# Supplementary material for: Complementary evolution of coding and noncoding sequence underlies mammalian hairlessness
Source: eLife. 2022 Nov 7;11:e76911. doi: 10.7554/eLife.76911 (PMC9803358; doi:10.7554/eLife.76911)
Supplement: Figure 1—source data 1. — Species phenotype information (weight, marine status, and hairless status), names, and genome codes. [file elife-76911-fig1-data1.csv]

	code	name	weight.grams	hairless	marine
1	vicPac2	Alpaca	62000	no	no
2	turTru2	Dolphin	2e+05	yes	yes
3	tupChi1	Chinese_tree_shrew	200	no	no
5	triMan1	Manatee	322000	yes	yes
6	susScr3	Pig	130000	yes	no
7	speTri2	Squirrel	136	no	no
8	sorAra2	Shrew	9	no	no
9	sarHar1	Tasmanian_devil	6500	no	no
10	saiBol1	Squirrel_monkey	615	no	no
11	rn5	Rat	300	no	no
12	rheMac3	Rhesus	8235	no	no
13	pteVam1	Megabat	872	no	no
14	pteAle1	Black_flying-fox	672.1	no	no
15	ponAbe2	Orangutan	64475	no	no
16	papHam1	Baboon	18000	no	no
17	panTro4	Chimp	44983.5	no	no
18	panHod1	Tibetan_antelope	32000	no	no
19	oviAri3	Sheep	160000	no	no
20	otoGar3	Bushbaby	1300	no	no
21	oryCun2	Rabbit	1800	no	no
22	oryAfe1	Aardvark	60000	no	no
23	ornAna1	Platypus	1250	no	no
24	orcOrc1	Killer_whale	3990000	yes	yes
25	odoRosDi	Pacific_walrus	1010000	yes	yes
26	octDeg1	Brush-tailed_rat	235	no	no
27	ochPri3	Pika	100	no	no
28	nomLeu3	Gibbon	6000	no	no
29	myoLuc2	Microbat	10	no	no
30	myoDav1	Davids_Myotis_bat	5.3	no	no
31	musFur1	Ferret	809	no	no
32	monDom5	Opossum	105	no	no
33	mm10	Mouse	20.5	no	no
34	micOch1	Prairie_vole	40	no	no
36	mesAur1	Golden_hamster	105	no	no
37	macFas5	Crab-eating_macaque	6362.5	no	no
38	macEug2	Wallaby	6500	no	no
39	loxAfr3	Elephant	4800000	yes	no
40	lepWed1	Weddell_seal	425000	no	yes
41	jacJac1	Lesser_Egyptian_jerboa	55	no	no
42	hg19	Human	62035	yes	no
43	hetGla2	Naked_mole-rat	35	yes	no
44	gorGor3	Gorilla	139842	no	no
45	felCat5	Cat	5500	no	no
46	eriEur2	Hedgehog	750	no	no
47	equCab2	Horse	3e+05	no	no
48	eptFus1	Big_brown_bat	23	no	no
49	eleEdw1	Cape_elephant_shrew	50	no	no
50	echTel2	Tenrec	180	no	no
51	dasNov3	Armadillo	5500	yes	no
52	criGri1	Chinese_hamster	37	no	no
53	conCri1	Star-nosed_mole	55.3	no	no
54	chrAsi1	Cape_golden_mole	42	no	no
56	chlSab1	Green_monkey	5150	no	no
57	chiLan1	Chinchilla	642.5	no	no
58	cerSim1	White_rhinoceros	2180000	no	no
59	cavPor3	Guinea_pig	728	no	no
60	capHir1	Domestic_goat	61000	no	no
61	canFam3	Dog	26625	no	no
62	camFer1	Bactrian_camel	475000	no	no
63	calJac3	Marmoset	255.2	no	no
64	bosTau7	Cow	750000	no	no
65	ailMel1	Panda	117500	no	no
