# Supplementary material for: Complementary evolution of coding and noncoding sequence underlies mammalian hairlessness
Source: eLife. 2022 Nov 7;11:e76911. doi: 10.7554/eLife.76911 (PMC9803358; doi:10.7554/eLife.76911)
Supplement: Figure 1—source data 2. — Full gene results, including gene name, UCID, RERconverge results, Bayes factor results, and enrichment statistics, for nearby noncoding regions. [file elife-76911-fig1-data2.xlsx]

## Sheet: fullgeneresults
									Bayes Factor			Noncoding Enrichment
ucid	gene	Rho	N	P	p.adj	ES	permPval	permPadj	hairlessvmarine	hairless	marine	ncEnrichStat	ncEnrichP	ncEnrichPadj	ncEnrichnumregions	ncEnrichpermP	ncEnrichpermPadj
uc001aal.1	OR4F5	0.154077	74	0.109263	0.63071	0.961527	0.157	0.793077	1.06094	0.26398	0.248818	-0.137017	0.087026	0.274962	13	0.296371	0.967325
uc001abw.1	SAMD11	-0.0773886	98	0.353013	0.808069	-0.452209	0.392	0.885066	0.212648	0.227408	1.06941	-0.00765583	0.901008	0.953911	22	0.939	0.999167
uc001abz.4	NOC2L	-0.0285833	109	0.717241	0.941177	-0.144335	0.755	0.971623	1.02102	0.258383	0.253063	-0.00765583	0.901008	0.953911	22	0.939	0.999167
uc001aca.2	KLHL17	0.021039	68	0.83415	0.96655	0.0787556	0.851	0.98295	1.00077	0.249176	0.248985	-0.00765583	0.901008	0.953911	22	0.939	0.999167
uc001acd.3	PLEKHN1	0.0178311	106	0.823746	0.964405	0.0842069	0.867	0.984374	0.919377	0.20767	0.225881	-0.00765583	0.901008	0.953911	22	0.939	0.999167
uc001ach.2	C1orf170	0.189033	110	0.0161193	0.448551	1.79265	0.044	0.645598	2.85636	1.3445	0.470704	NA	NA	NA	NA	NA	NA
uc001aci.2	HES4	0.0562704	50	0.632889	0.919	0.198673	NA	NA	1.02398	0.28958	0.2828	-0.00765583	0.901008	0.953911	22	0.939	0.999167
uc001acj.4	ISG15	-0.0690391	101	0.400125	0.828699	-0.397804	0.394	0.885384	1.29179	0.271729	0.210351	-0.0187596	0.765864	0.884048	21	0.828	0.997631
uc001ack.2	AGRN	-0.0816685	105	0.310002	0.784889	-0.508635	0.448	0.905436	1.02776	0.303328	0.295135	-0.0475745	0.450132	0.678397	21	0.673	0.98782
uc001acu.2	C1orf159	0.0310627	91	0.719634	0.941817	0.142889	0.744	0.970716	0.788881	0.224913	0.285104	-0.0656481	0.472063	0.696375	10	0.878652	0.999167
uc001acv.3	LOC254099	-0.329107	30	0.0327356	0.505233	-1.48498	NA	NA	1.41025	0.784866	0.556543	NA	NA	NA	NA	NA	NA
uc001acy.2	TTLL10	0.0321485	102	0.693747	0.933895	0.158799	0.774	0.972768	0.527513	0.225991	0.428409	NA	NA	NA	NA	NA	NA
uc001add.3	TNFRSF18	-0.106337	85	0.235358	0.739268	-0.628271	0.258	0.847307	0.91807	0.351986	0.383398	NA	NA	NA	NA	NA	NA
uc001ade.3	TNFRSF4	-0.175048	98	0.0356585	0.511258	-1.44784	0.08	0.710218	4.09861	1.19322	0.291127	NA	NA	NA	NA	NA	NA
uc001adh.4	SDF4	0.0231387	96	0.78348	0.956396	0.105972	0.768	0.972237	0.997967	0.215638	0.216077	NA	NA	NA	NA	NA	NA
uc001adk.3	B3GALT6	0.0408797	61	0.700476	0.935697	0.154607	NA	NA	0.2421	0.277957	1.14811	NA	NA	NA	NA	NA	NA
uc001adl.2	FAM132A	0.00431801	92	0.959982	0.990295	0.0177371	0.962	0.993876	0.992749	0.222762	0.224389	NA	NA	NA	NA	NA	NA
uc001ado.3	UBE2J2	0.0336718	64	0.745333	0.947058	0.12765	0.752	0.971562	0.771812	0.264045	0.34211	NA	NA	NA	NA	NA	NA
uc001adt.1	SCNN1D	-0.144025	89	0.0998654	0.619685	-1.00059	0.193	0.811955	2.96125	0.762356	0.257444	NA	NA	NA	NA	NA	NA
uc001aeb.2	ACAP3	0.154027	97	0.0659352	0.564373	1.18088	0.171	0.798465	2.91503	0.778265	0.266983	NA	NA	NA	NA	NA	NA
uc001aed.3	PUSL1	-0.171997	96	0.0410949	0.516104	-1.38621	0.277	0.84933	1.78314	0.57724	0.323722	NA	NA	NA	NA	NA	NA
uc001aee.2	CPSF3L	0.130028	77	0.167775	0.689277	0.775273	0.242	0.837442	8.14459	2.14172	0.262962	NA	NA	NA	NA	NA	NA
uc001aeo.3	GLTPD1	-0.201633	96	0.016642	0.449654	-1.77879	0.007	0.481133	3.91571	1.79595	0.458652	NA	NA	NA	NA	NA	NA
uc001aer.4	DVL1	-0.0375753	94	0.65888	0.924682	-0.181194	0.716	0.966394	1.06782	0.242472	0.227072	NA	NA	NA	NA	NA	NA
uc001aew.3	MXRA8	0.0846758	84	0.34761	0.804938	0.458908	0.397	0.886714	1.13075	0.259879	0.229829	NA	NA	NA	NA	NA	NA
uc001afi.2	CCNL2	-0.0524637	96	0.533258	0.884272	-0.273063	0.649	0.954339	1.21418	0.28542	0.235073	NA	NA	NA	NA	NA	NA
uc001afo.4	MRPL20	0.217814	67	0.0314581	0.502632	1.50227	0.019	0.568346	4.4308	1.11018	0.250559	NA	NA	NA	NA	NA	NA
uc001afs.3	VWA1	-0.0730822	72	0.453847	0.854215	-0.34309	0.404	0.889502	0.405669	0.255499	0.629823	NA	NA	NA	NA	NA	NA
uc001aft.2	ATAD3C	0.142632	86	0.109321	0.63071	0.961298	0.203	0.817764	1.10532	0.248972	0.225249	NA	NA	NA	NA	NA	NA
uc001afv.3	ATAD3B	0.133199	86	0.134819	0.656316	0.870248	0.162	0.793077	1.1269	0.33674	0.29882	NA	NA	NA	NA	NA	NA
uc001afz.2	ATAD3A	-0.0615463	99	0.457804	0.856273	-0.339321	0.468	0.909592	1.42338	0.314098	0.22067	NA	NA	NA	NA	NA	NA
uc001agd.3	SSU72	0.0751248	21	0.687673	0.932546	0.162618	NA	NA	NA	0.492503	NA	NA	NA	NA	NA	NA	NA
uc001agg.3	MIB2	0.0275999	86	0.756675	0.950714	0.121091	0.789	0.975371	1.1103	0.282383	0.254331	NA	NA	NA	NA	NA	NA
uc001agp.3	MMP23B	-0.0144895	76	0.878648	0.976446	-0.0561849	0.891	0.988023	1.06706	0.261693	0.245248	NA	NA	NA	NA	NA	NA
uc001agv.1	CDK11B	0.0781351	86	0.380387	0.820352	0.419775	0.49	0.914316	1.45346	0.327296	0.225184	NA	NA	NA	NA	NA	NA
uc001ahg.4	SLC35E2B	-0.0567177	93	0.507504	0.877764	-0.29456	0.596	0.941005	0.987491	0.24049	0.243536	NA	NA	NA	NA	NA	NA
uc001ahi.1	MMP23A	-0.141552	49	0.234424	0.739023	-0.629999	NA	NA	1.64911	0.528634	0.320557	NA	NA	NA	NA	NA	NA
uc001aia.2	SLC35E2	-0.024683	87	0.780439	0.95628	-0.107661	0.819	0.977377	0.932816	0.245936	0.263649	NA	NA	NA	NA	NA	NA
uc001aie.3	NADK	-0.0481271	99	0.56152	0.895377	-0.250634	0.648	0.953957	1.03124	0.242978	0.235617	NA	NA	NA	NA	NA	NA
uc001aif.3	GNB1	-0.0550482	12	0.829896	0.965578	-0.0809761	NA	NA	1.02499	0.480171	0.468463	-0.204467	0.025105	0.127422	10	0.131772	0.89373
uc001aih.1	CALML6	0.120292	73	0.21437	0.724458	0.668836	0.343	0.874031	0.971328	0.324122	0.333689	NA	NA	NA	NA	NA	NA
uc001aij.2	TMEM52	-0.121887	83	0.179039	0.696985	-0.747053	0.309	0.858241	0.885655	0.50247	0.567342	NA	NA	NA	NA	NA	NA
uc001aik.3	C1orf222	-0.0626111	92	0.466882	0.860185	-0.330793	0.465	0.909592	0.782609	0.278008	0.355233	NA	NA	NA	NA	NA	NA
uc001aim.1	KIAA1751	-0.0292884	96	0.727976	0.943727	-0.137883	0.821	0.978028	0.682311	0.224111	0.328458	NA	NA	NA	NA	NA	NA
uc001aip.2	GABRD	0.0570637	78	0.542276	0.887537	0.26578	0.618	0.947212	1.70872	0.401513	0.234978	NA	NA	NA	NA	NA	NA
uc001aiq.3	PRKCZ	0.0641621	80	0.487601	0.869687	0.311935	0.585	0.939686	1.29592	0.308054	0.237711	0.0561755	0.500253	0.716107	12	0.597107	0.984653
uc001aja.4	SKI	0.0450981	77	0.632352	0.918857	0.199041	0.701	0.96365	0.99608	0.237606	0.238542	-0.0612629	0.462255	0.688301	12	0.868922	0.999167
uc001ajb.1	MORN1	0.0115347	104	0.886535	0.978069	0.0523039	0.897	0.988138	0.913477	0.207882	0.227572	0.0837939	0.218145	0.455328	18	0.456456	0.971468
uc001aje.2	RER1	0.00401286	46	0.97398	0.99371	0.0114497	NA	NA	0.571135	0.293377	0.513673	0.164996	0.0393263	0.169548	13	0.140404	0.90025
uc001ajg.3	PEX10	0.100142	102	0.219971	0.727239	0.657634	0.29	0.85091	1.10153	0.258394	0.234577	0.186684	0.0250805	0.127338	12	0.107943	0.89294
uc001aji.1	PLCH2	0.0909172	104	0.260721	0.753697	0.583824	0.359	0.876252	0.988149	0.285039	0.288457	0.146239	0.0580358	0.214524	14	0.397192	0.971468
uc001ajm.1	PANK4	0.0402241	90	0.64394	0.920736	0.191155	0.702	0.96365	0.762872	0.300583	0.394014	0.146239	0.0580358	0.214524	14	0.397192	0.971468
uc001ajn.3	HES5	0.0330601	52	0.774559	0.954459	0.110945	NA	NA	0.89224	0.279138	0.312851	0.146239	0.0580358	0.214524	14	0.397192	0.971468
uc001ajr.3	TNFRSF14	0	61	1	1	0	NA	NA	0.947206	0.260566	0.275089	0.142618	0.118224	0.327314	10	0.437901	0.971468
uc001ajv.2	FAM213B	0.00244453	85	0.978237	0.994893	0.0095561	0.974	0.995895	0.93658	0.230401	0.246003	NA	NA	NA	NA	NA	NA
uc001ajy.2	MMEL1	0.0240759	100	0.770337	0.952926	0.113319	0.789	0.975371	0.99755	0.218744	0.219281	NA	NA	NA	NA	NA	NA
uc001ajz.3	ACTRT2	0.0705196	97	0.39984	0.82867	0.398113	0.425	0.897682	1.062	0.232091	0.21854	0.0358701	0.455969	0.683297	36	0.75	0.992102
uc001akf.3	PRDM16	0.0212491	107	0.789702	0.957892	0.102537	0.842	0.982535	1.18994	0.243913	0.204978	0.0113628	0.678415	0.833795	111	0.682	0.98782
uc001akg.4	ARHGEF16	0.0087082	106	0.913381	0.980115	0.0393481	0.905	0.988138	0.993226	0.205446	0.206847	0.0829484	0.300201	0.545513	13	0.372372	0.971468
uc001akl.3	MEGF6	0.0715411	107	0.369232	0.815167	0.432701	0.452	0.906638	0.789249	0.22814	0.28906	0.059267	0.397286	0.636093	17	0.358	0.971468
uc001akm.3	TPRG1L	0.0100348	64	0.922888	0.981379	0.034851	NA	NA	0.973766	0.257587	0.264527	0.000809735	0.991931	0.995761	13	0.851	0.999167
uc001ako.3	WRAP73	0.0728644	103	0.369751	0.815595	0.43209	0.423	0.897682	1.2631	0.300947	0.23826	0.000809735	0.991931	0.995761	13	0.851	0.999167
uc001akp.3	TP73	0.0709035	105	0.378103	0.819461	0.42239	0.401	0.888589	1.01342	0.247866	0.244584	0.000809735	0.991931	0.995761	13	0.851	0.999167
uc001akv.2	CCDC27	-0.0681062	101	0.406523	0.8316	-0.390915	0.475	0.911625	0.753536	0.311763	0.413733	NA	NA	NA	NA	NA	NA
uc001akw.4	SMIM1	0.070619	79	0.447809	0.850974	0.348907	0.542	0.927524	0.927097	0.236609	0.255215	NA	NA	NA	NA	NA	NA
uc001akx.1	LRRC47	0.114304	87	0.196756	0.711722	0.706072	0.222	0.830411	1.34447	0.335765	0.249738	NA	NA	NA	NA	NA	NA
uc001aky.2	CEP104	-0.0330225	111	0.672818	0.928204	-0.172103	0.702	0.96365	1.0422	0.221331	0.212369	NA	NA	NA	NA	NA	NA
uc001alc.3	DFFB	0.00943646	100	0.908903	0.979717	0.0414825	0.935	0.989861	0.98125	0.212381	0.216439	NA	NA	NA	NA	NA	NA
uc001alf.3	C1orf174	-0.0149274	101	0.855642	0.97116	-0.0677077	0.88	0.987008	0.83649	0.23586	0.281964	NA	NA	NA	NA	NA	NA
uc001aln.3	AJAP1	0.0295644	89	0.735532	0.945417	0.133399	0.813	0.976661	1.25964	0.304748	0.241932	0.0517656	0.318101	0.561273	31	0.598	0.984916
uc001alo.4	BC037321	-0.134512	77	0.153593	0.675707	-0.813629	NA	NA	1.60699	0.633719	0.394353	NA	NA	NA	NA	NA	NA
uc001alq.2	NPHP4	0.019857	112	0.798655	0.959409	0.097641	0.823	0.978226	0.894392	0.201174	0.224928	0.0447806	0.522448	0.731891	17	0.472	0.971541
uc001aly.2	KCNAB2	0.0841675	63	0.420637	0.837879	0.376092	0.444	0.905436	0.973788	0.259607	0.266594	0.00819493	0.912454	0.959789	15	0.679	0.98782
uc001amb.2	CHD5	-0.0358867	100	0.663456	0.925197	-0.178188	0.688	0.960022	0.927184	0.246913	0.266304	0.0261632	0.670774	0.828319	22	0.56	0.98175
uc001amd.3	RPL22	0.0751248	21	0.687673	0.932546	0.162618	NA	NA	1.00164	0.3952	0.394554	0.0360839	0.61709	0.796117	16	0.669	0.98782
uc001amg.3	RNF207	0.0409776	97	0.624689	0.917083	0.204336	0.69	0.960473	1.3073	0.279649	0.213912	0.0548487	0.433408	0.665638	17	0.474	0.972306
uc001amk.3	ICMT	-0.00558498	67	0.956011	0.989324	-0.019537	0.97	0.995491	1.06187	0.270353	0.254601	0.0596399	0.367847	0.610177	19	0.445	0.971468
uc001amp.2	GPR153	0.159231	91	0.0657655	0.563996	1.182	0.12	0.768766	1.1359	1.49632	1.31731	0.0596399	0.367847	0.610177	19	0.445	0.971468
uc001amt.3	ACOT7	0.17641	80	0.0563314	0.543901	1.24925	0.076	0.701696	1.41111	0.362882	0.25716	0.109318	0.0693628	0.240334	23	0.284	0.964475
uc001amx.3	HES2	0.0619659	74	0.519519	0.881196	0.284399	0.495	0.917777	1.145	0.275087	0.24025	0.139739	0.0459544	0.186274	17	0.244	0.957761
uc001amy.3	ESPN	-0.0152475	97	0.855556	0.97116	-0.0677515	0.854	0.984042	1.08425	0.246395	0.227249	0.139739	0.0459544	0.186274	17	0.244	0.957761
uc001anh.3	TNFRSF25	-0.103675	101	0.206403	0.72244	-0.685283	0.185	0.808938	1.37476	0.384716	0.279843	0.144988	0.0517545	0.200246	15	0.257	0.959755
uc001ans.3	NOL9	-0.0968208	103	0.233326	0.738384	-0.632037	0.378	0.881848	0.683752	0.435648	0.637144	0.11379	0.0944617	0.288681	18	0.253	0.959755
uc001ant.3	TAS1R1	0.0799645	105	0.320207	0.789719	0.49457	0.407	0.890151	0.233592	0.251955	1.07861	0.0593116	0.476636	0.699191	12	0.367367	0.971468
uc001anx.3	ZBTB48	-0.107895	102	0.18631	0.701698	-0.729763	0.189	0.808991	1.40529	0.371443	0.264317	0.0762239	0.323177	0.566509	14	0.341	0.971468
uc001aoa.3	KLHL21	-0.128272	67	0.205203	0.721402	-0.687817	0.21	0.825324	1.59105	0.468778	0.294635	0.0301928	0.695551	0.843917	14	0.589	0.983271
uc001aob.4	PHF13	-0.120371	83	0.184506	0.700609	-0.73399	0.228	0.833035	0.281724	0.463074	1.64371	NA	NA	NA	NA	NA	NA
uc001aod.3	THAP3	0.0298548	101	0.715972	0.940429	0.145104	0.758	0.971851	1.08296	0.227364	0.209946	-0.0385205	0.617589	0.796197	14	0.94995	0.999167
uc001aof.2	DNAJC11	-0.00835151	77	0.929403	0.98281	-0.031796	0.946	0.989978	0.562555	0.238238	0.423492	-0.048241	0.25708	0.500196	46	0.656	0.98782
uc001aoi.3	CAMTA1	0.0110106	103	0.892187	0.978669	0.0495442	0.906	0.988138	0.799568	0.208204	0.260396	0.0436975	0.00834054	0.0612805	304	0.508	0.977493
uc001aol.3	VAMP3	0.0475121	70	0.631265	0.918607	0.199789	0.631	0.950186	1.02571	0.299435	0.291931	-0.0651574	0.352057	0.594195	17	0.828	0.997631
uc001aoo.3	PER3	0.0849111	99	0.305678	0.781577	0.514735	0.434	0.902626	1.31946	0.287598	0.217967	-0.050616	0.483093	0.70411	16	0.916	0.999167
uc001aos.3	UTS2	-0.0726097	95	0.391064	0.825182	-0.407753	0.373	0.881364	0.0207037	0.248028	11.9799	NA	NA	NA	NA	NA	NA
uc001aot.3	TNFRSF9	-0.0226355	102	0.781585	0.956396	-0.107024	0.817	0.976875	0.682619	0.217716	0.318943	-0.0621701	0.455652	0.682954	12	0.689	0.988024
uc001aox.4	PARK7	0.0804215	72	0.409805	0.831666	0.387423	0.419	0.897236	0.202756	0.357618	1.76378	-0.0428258	0.517868	0.728768	19	0.843	0.999167
uc001aoz.3	ERRFI1	-0.0190794	92	0.82454	0.964812	-0.0837883	0.847	0.982807	1.01229	0.259689	0.256535	-0.0363407	0.529079	0.737777	25	0.882	0.999167
uc001apb.3	SLC45A1	0.0595284	99	0.47268	0.862918	0.325433	0.596	0.941005	1.05143	0.24889	0.236717	-0.0784788	0.20228	0.436572	22	0.784	0.994873
uc001apf.3	RERE	0.0928608	100	0.26017	0.753181	0.584744	0.302	0.855547	1.06909	0.241865	0.226234	0.0214828	0.46598	0.690913	96	0.689	0.988024
uc001apg.1	BC113958	-0.0330601	52	0.774559	0.954459	-0.110945	NA	NA	0.552483	0.292323	0.529107	NA	NA	NA	NA	NA	NA
uc001apj.2	ENO1	0.00374639	79	0.967878	0.991877	0.0141792	0.97	0.995491	0.741918	0.233592	0.314849	0.0816778	0.205763	0.440257	20	0.326	0.971468
uc001apo.3	SLC2A5	-0.0190022	103	0.815054	0.962152	-0.0888138	0.808	0.976381	0.888505	0.232113	0.26124	NA	NA	NA	NA	NA	NA
uc001apq.1	GPR157	0.162216	91	0.0608602	0.55143	1.21567	0.061	0.677218	2.74909	1.2364	0.449749	NA	NA	NA	NA	NA	NA
uc001apt.3	H6PD	-0.025417	112	0.744036	0.946567	-0.128406	0.77	0.972237	1.10073	0.23307	0.211742	0.0442347	0.504193	0.720013	19	0.455	0.971468
uc001apw.3	SLC25A33	-0.0830163	80	0.369132	0.815167	-0.432818	0.357	0.876072	0.397835	0.330365	0.830408	-0.0322142	0.724176	0.861217	10	0.895487	0.999167
uc001aqb.4	PIK3CD	-0.0983535	105	0.221471	0.728768	-0.654684	0.224	0.830535	0.38272	0.282811	0.738949	0.0905044	0.298435	0.543344	11	0.45992	0.971468
uc001aqh.3	CLSTN1	0.0951353	114	0.217505	0.725019	0.662531	0.318	0.859614	1.15352	0.421928	0.365776	0.0649406	0.280663	0.524251	23	0.338	0.971468
uc001aql.1	CTNNBIP1	0.0704295	36	0.614706	0.9134	0.211332	NA	NA	0.999633	0.321611	0.321729	0.058842	0.362008	0.604145	20	0.363	0.971468
uc001aqm.3	LZIC	-0.192194	48	0.110223	0.630968	-0.957728	NA	NA	NA	0.6516	NA	0.0470735	0.489053	0.707488	18	0.423	0.971468
uc001aqp.3	NMNAT1	-0.0518234	90	0.551523	0.891679	-0.258437	0.615	0.946618	1.48823	0.330908	0.22235	0.0335378	0.631937	0.804118	17	0.457	0.971468
uc001aqq.3	RBP7	0.0747039	64	0.471158	0.862516	0.326834	NA	NA	2.21052	0.825825	0.373589	0.0780817	0.348779	0.591153	12	0.123123	0.89294
uc001aqs.4	UBE4B	-0.0246134	109	0.755154	0.950085	-0.121964	0.794	0.975675	0.833358	0.216644	0.259965	-0.0282884	0.723853	0.861018	13	0.814	0.997631
uc001aqw.4	KIF1B	0.179001	104	0.0268061	0.481534	1.57177	0.034	0.620791	2.54631	0.658788	0.258723	-0.0407357	0.480479	0.70194	25	0.539	0.980846
uc001arc.3	PGD	-0.00740335	90	0.932207	0.983206	-0.0304877	0.944	0.989869	0.544158	0.221495	0.407041	-0.0751665	0.140784	0.360371	32	0.377	0.971468
uc001arj.3	DFFA	-0.149287	105	0.0634859	0.558828	-1.19732	0.057	0.665408	2.58207	0.710746	0.275262	-0.0352719	0.324632	0.568071	65	0.636	0.985384
uc001arn.3	PEX14	-0.0169091	87	0.84856	0.9702	-0.0713176	0.86	0.984084	0.759345	0.24275	0.319683	-0.0266402	0.230387	0.469657	169	0.826	0.997631
uc001aro.4	CASZ1	-0.0658315	112	0.397726	0.828062	-0.400415	0.536	0.927524	1.39627	0.281803	0.201825	-0.0122145	0.526709	0.735367	224	0.94	0.999167
uc001art.3	TARDBP	0.0479586	43	0.706687	0.937528	0.150773	NA	NA	NA	0.308144	NA	0.147771	0.0140941	0.0868158	23	0.263	0.959755
uc001aru.3	MASP2	0.0329024	113	0.671136	0.928204	0.173189	0.67	0.955853	0.983642	0.201937	0.205295	0.116177	0.0536068	0.204676	23	0.355	0.971468
uc001arz.1	SRM	0.252179	70	0.0108524	0.425255	1.96447	0.02	0.571719	2.1007	48.1342	22.9134	0.0896736	0.200279	0.434639	17	0.372	0.971468
uc001asa.3	EXOSC10	-0.10084	112	0.195176	0.710501	-0.709574	0.175	0.800229	1.49327	0.299368	0.200479	0.10664	0.152519	0.376625	15	0.405	0.971468
uc001asd.3	MTOR	-0.0438931	90	0.614011	0.9134	-0.211824	0.595	0.941005	1.31775	0.295751	0.224437	0.121824	0.0187969	0.104708	31	0.218	0.939422
uc001ase.4	ANGPTL7	0.0486923	97	0.561026	0.895377	0.251017	0.593	0.940921	0.641814	0.219699	0.34231	0.0593462	0.476379	0.699025	12	0.837	0.997995
uc001asg.3	UBIAD1	-0.0496383	86	0.577347	0.903341	-0.238563	0.585	0.939686	1.30568	0.297642	0.22796	0.108088	0.0725535	0.246899	23	0.317	0.971468
uc001ash.4	PTCHD2	0.101519	115	0.186237	0.701691	0.729934	0.284	0.849398	1.10775	0.264386	0.23867	0.0993074	0.0339646	0.156387	38	0.176	0.919505
uc001asj.3	FBXO2	0.00695604	97	0.933815	0.983206	0.029739	0.928	0.989275	0.877255	0.242372	0.276284	0.0853025	0.156455	0.381176	23	0.243	0.957761
uc001asm.3	FBXO44	0.115415	78	0.217761	0.725135	0.662019	0.245	0.839186	1.23152	0.30157	0.244875	0.0824993	0.180114	0.410381	22	0.216	0.936058
uc001aso.3	FBXO6	-0.0630361	108	0.426658	0.839387	-0.36992	0.46	0.909126	0.911917	0.274769	0.301309	0.0824993	0.180114	0.410381	22	0.216	0.936058
uc001asr.1	DRAXIN	-0.0463156	108	0.559175	0.895377	-0.252452	0.568	0.937573	0.414455	0.238444	0.575319	0.0664128	0.291777	0.535577	21	0.31	0.971468
uc001ass.2	AK125437	-0.0976466	54	0.388306	0.824222	-0.410825	NA	NA	0.920341	0.337902	0.367149	NA	NA	NA	NA	NA	NA
uc001asv.3	AGTRAP	0.0533842	95	0.528307	0.88265	0.277114	0.591	0.939827	1.05133	0.245931	0.233924	-0.0194865	0.815114	0.909821	12	0.838	0.997995
uc001asz.3	C1orf167	-0.00867433	103	0.914965	0.98036	-0.0385956	0.915	0.988138	0.933412	0.210129	0.225119	NA	NA	NA	NA	NA	NA
uc001atc.2	MTHFR	0.159551	104	0.0484138	0.532947	1.31503	0.044	0.645598	2.73935	0.572016	0.208814	NA	NA	NA	NA	NA	NA
uc001ate.5	CLCN6	0.0630178	95	0.456642	0.855269	0.340424	0.504	0.919363	0.998505	0.215801	0.216124	NA	NA	NA	NA	NA	NA
uc001ati.3	NPPA	0.10542	94	0.215515	0.724458	0.666522	0.241	0.836227	0.91952	0.283382	0.308185	NA	NA	NA	NA	NA	NA
uc001atj.3	NPPB	0.0238149	96	0.777317	0.95549	0.109402	0.78	0.973977	0.846978	0.216655	0.255797	NA	NA	NA	NA	NA	NA
uc001atk.3	KIAA2013	0.100201	94	0.239105	0.740202	0.621412	0.233	0.833167	1.39519	0.394312	0.282623	NA	NA	NA	NA	NA	NA
uc001atm.3	PLOD1	0.0855691	104	0.289814	0.770099	0.537881	0.284	0.849398	1.2125	0.474262	0.391144	NA	NA	NA	NA	NA	NA
uc001ato.2	MIIP	0.0221509	108	0.779987	0.956093	0.107913	0.794	0.975675	0.610872	0.206001	0.337225	NA	NA	NA	NA	NA	NA
uc001atq.3	TNFRSF8	-0.0222315	109	0.778195	0.955666	-0.108911	0.794	0.975675	0.521569	0.216768	0.415608	-0.0024777	0.978347	0.989204	10	0.992933	1
uc001att.3	TNFRSF1B	-0.104101	103	0.200037	0.716815	-0.69889	0.215	0.82752	1.86299	0.390369	0.209539	NA	NA	NA	NA	NA	NA
uc001atv.3	VPS13D	0.100413	119	0.183409	0.700609	0.736579	0.206	0.820446	2.03835	0.400574	0.196519	-0.0963954	0.00490268	0.0435697	71	0.245	0.957954
uc001auc.3	DHRS3	-0.0386757	62	0.713614	0.939612	-0.146537	0.741	0.970574	0.625288	0.267641	0.428028	-0.0287724	0.549849	0.751195	36	0.802	0.996958
uc001auf.3	AADACL4	0.159695	94	0.0606269	0.55143	1.21733	0.103	0.744343	1.10576	0.553219	0.500306	-0.00633644	0.923779	0.965989	19	0.988	0.999932
uc001auh.3	C1orf158	-0.144744	95	0.0873094	0.605714	-1.05894	0.099	0.738204	3.29757	0.73904	0.224116	NA	NA	NA	NA	NA	NA
uc001aui.3	PRAMEF12	-0.164784	76	0.0824917	0.59864	-1.08359	NA	NA	1.09089	0.52532	0.481552	NA	NA	NA	NA	NA	NA
uc001auj.2	PRAMEF1	-0.0788905	39	0.556453	0.89483	-0.254571	NA	NA	1.20429	0.412832	0.342802	NA	NA	NA	NA	NA	NA
uc001auk.2	PRAMEF11	-0.0738549	50	0.530702	0.883148	-0.27515	NA	NA	0.706756	0.284126	0.402014	NA	NA	NA	NA	NA	NA
uc001aum.1	PRAMEF2	-0.016269	31	0.914458	0.980336	-0.0388362	NA	NA	0.974051	0.392047	0.402491	NA	NA	NA	NA	NA	NA
uc001aun.2	PRAMEF4	-0.140676	50	0.232414	0.737309	-0.633737	NA	NA	1.18989	0.435388	0.365906	NA	NA	NA	NA	NA	NA
uc001auo.3	PRAMEF10	0.0383674	37	0.780853	0.95628	0.107431	NA	NA	0.987044	0.31824	0.322418	NA	NA	NA	NA	NA	NA
uc001aup.3	PRAMEF8	-0.1236	47	0.309656	0.784889	-0.509121	NA	NA	1.08919	0.372327	0.34184	NA	NA	NA	NA	NA	NA
uc001auq.2	PRAMEF6	0.0035169	50	0.976183	0.994111	0.0104686	NA	NA	0.836377	0.287483	0.343725	NA	NA	NA	NA	NA	NA
uc001aut.1	PRAMEF3	-0.0433766	41	0.739912	0.946309	-0.13082	NA	NA	0.716696	0.316501	0.441611	NA	NA	NA	NA	NA	NA
uc001auu.1	PRAMEF5	-0.0844084	37	0.5405	0.887537	-0.267204	NA	NA	1.10324	0.351353	0.318473	NA	NA	NA	NA	NA	NA
uc001auw.1	PRAMEF9	0.138123	37	0.316563	0.786989	0.49954	NA	NA	1.26986	0.425628	0.335178	NA	NA	NA	NA	NA	NA
uc001aux.3	PRAMEF16	0.0753145	35	0.595883	0.908691	0.224839	NA	NA	1.00545	0.335034	0.333219	NA	NA	NA	NA	NA	NA
uc001avb.3	LRRC38	0.20197	80	0.0288895	0.492435	1.53926	0.029	0.608528	1.63611	0.468332	0.286248	NA	NA	NA	NA	NA	NA
uc001avd.3	PDPN	0.0134677	105	0.867043	0.974346	0.0619596	0.888	0.987199	0.980768	0.206882	0.210938	-0.161241	0.0366288	0.163577	14	0.019	0.788781
uc001avi.3	PRDM2	0.000762341	115	0.99208	0.999328	0.0034531	0.991	0.999923	1.01039	0.200223	0.198164	-0.0987525	0.185214	0.416022	15	0.188	0.92064
uc001avm.4	KAZN	0.0149561	91	0.862787	0.973525	0.0640962	0.853	0.984011	0.958939	0.220216	0.229645	0.0316461	0.376841	0.618168	65	0.866	0.999167
uc001avx.3	TMEM51	0.0554375	95	0.512567	0.877828	0.29025	0.582	0.939686	1.17751	0.257164	0.218396	NA	NA	NA	NA	NA	NA
uc001awb.2	FHAD1	-0.0894243	112	0.250652	0.747372	-0.600929	0.357	0.876072	1.223	0.416135	0.340259	NA	NA	NA	NA	NA	NA
uc001awh.2	EFHD2	-0.115745	48	0.336113	0.796873	-0.473515	NA	NA	1.23128	0.38719	0.314461	NA	NA	NA	NA	NA	NA
uc001awi.1	CTRC	0.0781648	108	0.324278	0.790819	0.489083	0.283	0.84933	1.1915	0.381032	0.319792	NA	NA	NA	NA	NA	NA
uc001awk.3	CELA2A	0.147638	92	0.0862349	0.604181	1.06432	0.059	0.667473	0.457415	0.543296	1.18775	NA	NA	NA	NA	NA	NA
uc001awl.3	CELA2B	0.169087	92	0.0494313	0.533066	1.306	0.04	0.63642	1.08066	0.479611	0.443812	NA	NA	NA	NA	NA	NA
uc001awn.4	CASP9	-0.0272228	105	0.735058	0.945067	-0.133679	0.742	0.970716	1.02497	0.212764	0.207581	NA	NA	NA	NA	NA	NA
uc001aws.3	DNAJC16	-0.0277873	107	0.72727	0.943527	-0.138304	0.755	0.971623	1.01147	0.214335	0.211903	NA	NA	NA	NA	NA	NA
uc001awv.2	AGMAT	-0.0281403	107	0.723947	0.942904	-0.140293	0.758	0.971851	0.774647	0.212505	0.274325	NA	NA	NA	NA	NA	NA
uc001awx.2	DDI2	-0.130631	74	0.174525	0.693957	-0.758142	0.225	0.83165	1.45477	0.426454	0.293142	-0.137102	0.133135	0.349705	10	0.179671	0.919505
uc001axb.1	SLC25A34	-0.0307481	91	0.722354	0.942495	-0.14125	0.742	0.970716	1.09056	0.302849	0.277699	NA	NA	NA	NA	NA	NA
uc001axc.4	TMEM82	0.0908555	106	0.256423	0.750976	0.591043	0.264	0.848573	0.605484	0.321286	0.530627	NA	NA	NA	NA	NA	NA
uc001axe.1	FBLIM1	-0.00746369	101	0.927523	0.982016	-0.0326754	0.919	0.988547	0.683339	0.210036	0.307368	-0.120478	0.0619882	0.223496	20	0.103	0.89294
uc001axk.1	SPEN	-0.0774732	116	0.310979	0.785491	-0.507268	0.484	0.91259	1.59285	0.322677	0.202579	-0.0456698	0.402535	0.640307	28	0.348	0.971468
uc001axl.4	ZBTB17	-0.0340496	101	0.678163	0.929277	-0.168666	0.729	0.968056	1.13921	0.239113	0.209893	-0.0774528	0.188724	0.420778	24	0.143	0.90025
uc001axn.3	C1orf64	-0.0290478	95	0.731507	0.944379	-0.135782	0.75	0.971413	0.532088	0.232661	0.43726	0.0970391	0.208486	0.443502	14	0.159	0.907511
uc001axo.2	HSPB7	0.14155	61	0.182864	0.7003	0.737872	0.163	0.793077	1.19164	0.429094	0.360087	0.0999944	0.165892	0.39282	16	0.277	0.962758
uc001axu.3	CLCNKA	0.076689	108	0.333496	0.795148	0.476909	0.397	0.886714	0.958649	0.301217	0.31421	0.109886	0.106325	0.30914	18	0.181	0.919505
uc001axz.4	FAM131C	-0.0328518	95	0.697974	0.934574	-0.156161	0.755	0.971623	0.909407	0.239378	0.263224	0.0867999	0.118211	0.327314	27	0.126	0.89294
uc001aya.2	EPHA2	0.0594267	111	0.447294	0.850789	0.349407	0.524	0.926321	0.680886	0.20745	0.304677	0.0488855	0.378914	0.61927	27	0.293	0.966111
uc001ayc.1	ARHGEF19	-0.0972036	110	0.215975	0.724458	-0.665597	0.242	0.837442	0.966651	0.37925	0.392334	-0.0249573	0.691979	0.841291	21	0.868	0.999167
uc001ayd.3	RSG1	0.0735149	86	0.409192	0.831666	0.388073	0.423	0.897682	1.12875	0.26355	0.233489	-0.0672632	0.336712	0.579884	17	0.902	0.999167
uc001ayg.3	FBXO42	0.0341121	100	0.679146	0.929357	0.168037	0.674	0.955853	0.414636	0.250843	0.604972	-0.075631	0.266349	0.50912	18	0.855	0.999167
uc001aym.5	SZRD1	0.283654	29	0.0707011	0.576722	1.15057	NA	NA	1.30135	0.613745	0.47162	-0.155055	0.00999908	0.0688531	23	0.103	0.89294
uc001ayn.3	SPATA21	0.0442769	99	0.593246	0.908138	0.226765	0.58	0.939039	1.02408	0.219616	0.214452	-0.151716	0.0187585	0.104585	20	0.132	0.89373
uc001ayq.3	NECAP2	0.049686	97	0.553059	0.892433	0.257228	0.576	0.939039	1.00966	0.237802	0.235526	-0.125884	0.0643055	0.228781	18	0.191	0.924073
uc001azn.1	ESPNP	0.0743961	83	0.412121	0.832949	0.384975	0.365	0.877191	1.49313	0.351747	0.235577	-0.0757505	0.0404367	0.172724	61	0.679	0.98782
uc001azt.2	CROCC	-0.0099541	117	0.895976	0.978669	-0.0477035	0.895	0.988138	1.21424	0.239592	0.197319	NA	NA	NA	NA	NA	NA
uc001azw.3	MFAP2	0.0945071	81	0.303507	0.780067	0.517831	0.292	0.85091	0.987127	0.259039	0.262417	NA	NA	NA	NA	NA	NA
uc001baa.2	ATP13A2	0.109193	110	0.164554	0.686373	0.783693	0.265	0.848573	0.480324	0.471434	0.981493	NA	NA	NA	NA	NA	NA
uc001bae.3	SDHB	0.128483	91	0.137622	0.658498	0.861312	0.109	0.752874	3.09463	0.795518	0.257064	NA	NA	NA	NA	NA	NA
uc001baf.3	PADI2	0.035363	98	0.671274	0.928204	0.1731	0.709	0.966052	0.998738	0.212708	0.212977	NA	NA	NA	NA	NA	NA
uc001bah.1	PADI1	0.0627872	112	0.419908	0.837843	0.376846	0.426	0.897682	1.00054	0.247609	0.247476	NA	NA	NA	NA	NA	NA
uc001bai.3	PADI3	0.0927742	115	0.22707	0.733183	0.64384	0.307	0.858235	1.57275	0.595471	0.378618	NA	NA	NA	NA	NA	NA
uc001baj.2	PADI4	0.138646	117	0.0685909	0.570427	1.16373	0.107	0.751137	0.17595	0.477687	2.7149	NA	NA	NA	NA	NA	NA
uc001bak.1	PADI6	-0.100392	100	0.223487	0.728768	-0.650748	0.276	0.84933	1.63943	0.673267	0.410672	NA	NA	NA	NA	NA	NA
uc001bal.3	RCC2	-0.0376362	62	0.720985	0.942209	-0.142074	0.737	0.96944	1.2391	0.339908	0.274319	NA	NA	NA	NA	NA	NA
uc001ban.3	ARHGEF10L	0.0945639	117	0.214204	0.724458	0.669171	0.22	0.829829	1.15288	0.260361	0.225835	0.0665341	0.231088	0.470503	27	0.389	0.971468
uc001bat.3	ACTL8	-0.148812	90	0.0872793	0.605714	-1.05909	0.183	0.807215	1.81259	0.693256	0.382468	0.0591747	0.212466	0.447883	37	0.543	0.980846
uc001bau.2	IGSF21	0.224991	98	0.00693038	0.373495	2.15924	0.01	0.507049	1.45124	3.29589	2.27109	0.120985	0.0001347	0.0037632	83	0.197	0.925324
uc001bax.3	KLHDC7A	0.110683	114	0.151366	0.674369	0.819971	0.198	0.815031	0.778444	0.486718	0.625245	0.0785583	0.248282	0.49084	18	0.653	0.98782
uc001bay.3	PAX7	-0.105433	95	0.212983	0.724458	-0.671655	0.236	0.833655	1.30173	0.381106	0.292769	-0.000758424	0.979681	0.989204	94	0.928	0.999167
uc001bba.1	TAS1R2	0.16991	107	0.0329621	0.505457	1.48198	0.052	0.655938	0.204388	0.691439	3.38298	-0.0414133	0.417085	0.65133	32	0.591	0.983271
uc001bbc.3	ALDH4A1	0.0677586	104	0.401915	0.829447	0.395866	0.481	0.912484	1.19037	0.279244	0.234585	-0.0569988	0.279509	0.523193	30	0.601	0.984961
uc001bbd.2	IFFO2	0.0801895	66	0.43194	0.841579	0.364577	0.468	0.909592	0.643474	0.263061	0.408815	-0.00804009	0.893745	0.949994	23	1	1
uc001bbi.3	UBR4	0.0262113	112	0.73633	0.94586	0.132927	0.777	0.973374	0.631923	0.210273	0.332751	-0.0195917	0.786035	0.895659	16	0.876	0.999167
uc001bbo.4	EMC1	-0.0065347	110	0.933708	0.983206	-0.0297887	0.941	0.989869	1.06219	0.214776	0.202202	0.00775095	0.919978	0.963678	14	0.9	0.999167
uc001bbs.3	MRTO4	0.0296196	87	0.738005	0.946069	0.131941	0.737	0.96944	0.85463	0.2254	0.26374	NA	NA	NA	NA	NA	NA
uc001bbv.1	AKR7A3	0.0900929	87	0.30895	0.784486	0.510112	0.448	0.905436	0.853667	0.28801	0.33738	NA	NA	NA	NA	NA	NA
uc001bbw.3	AKR7A2	0.0964672	102	0.237368	0.740202	0.624578	0.383	0.8845	0.705552	0.363426	0.515095	-0.106965	0.199299	0.433362	12	0.392749	0.971468
uc001bby.3	PQLC2	0.0579908	111	0.458347	0.856494	0.338806	0.541	0.927524	0.923158	0.369271	0.400009	-0.0987348	0.200644	0.435026	14	0.372	0.971468
uc001bcf.2	AX748283	-0.30548	32	0.0402387	0.511764	-1.39536	NA	NA	2.54052	1.54181	0.606888	NA	NA	NA	NA	NA	NA
uc001bcj.2	NBL1	-0.0989269	89	0.25837	0.752836	-0.587757	0.288	0.85091	0.53657	0.452684	0.843662	-0.177073	0.00265659	0.0292715	24	0.02	0.788781
uc001bcl.3	HTR6	0.180898	99	0.0290894	0.492435	1.53627	0.048	0.650755	0.660473	0.459298	0.695408	-0.171725	0.00641172	0.0515519	21	0.038	0.848474
uc001bcn.3	TMCO4	-0.0293007	112	0.706616	0.937528	-0.150817	0.709	0.966052	0.884243	0.214015	0.242032	-0.169913	0.00848363	0.0618806	20	0.048	0.851274
uc001bcr.3	RNF186	0.052805	104	0.513613	0.878152	0.289364	0.652	0.954666	0.809774	0.270939	0.334586	NA	NA	NA	NA	NA	NA
uc001bcs.4	OTUD3	-0.0499192	95	0.555417	0.894238	-0.255381	0.643	0.953403	1.27086	0.280287	0.220549	NA	NA	NA	NA	NA	NA
uc001bct.1	PLA2G2E	0.208049	96	0.0134843	0.432546	1.87017	0.023	0.580253	1001.57	276.461	0.276026	NA	NA	NA	NA	NA	NA
uc001bcy.3	PLA2G5	0.163781	103	0.04379	0.525368	1.35862	0.09	0.727574	1.62177	0.695411	0.428797	NA	NA	NA	NA	NA	NA
uc001bcz.4	PLA2G2D	0.0261246	106	0.744178	0.946567	0.128323	0.748	0.971263	0.992061	0.205481	0.207125	NA	NA	NA	NA	NA	NA
uc001bdb.3	UBXN10	0.0252054	104	0.75519	0.950085	0.121944	0.78	0.973977	0.979475	0.207363	0.211708	-0.047983	0.564761	0.762603	12	0.661662	0.98782
uc001bdh.3	CAMK2N1	NA	NA	NA	NA	NA	NA	NA	NA	0.456111	NA	-0.0703944	0.189141	0.4213	29	0.217	0.938122
uc001bdi.4	MUL1	0.02679	96	0.750372	0.949116	0.124723	0.739	0.970086	0.154524	0.223852	1.44866	-0.0450404	0.426301	0.659435	26	0.381	0.971468
uc001bdj.3	FAM43B	0.0929246	56	0.402821	0.829986	0.394888	NA	NA	0.798455	0.289235	0.362243	-0.0816681	0.307723	0.553195	13	0.291	0.966111
uc001bdk.3	CDA	-0.0780051	82	0.392755	0.825666	-0.405878	0.422	0.897682	1.65505	0.386666	0.233628	NA	NA	NA	NA	NA	NA
uc001bdm.3	PINK1	0.0662815	109	0.401031	0.829009	0.396823	0.401	0.888589	1.04553	0.221648	0.211997	NA	NA	NA	NA	NA	NA
uc001bdo.1	DDOST	0.0164058	96	0.845526	0.969716	0.072873	0.828	0.979501	0.472735	0.215275	0.455381	NA	NA	NA	NA	NA	NA
uc001bdr.4	KIF17	0.031465	114	0.683373	0.930806	0.165342	0.75	0.971413	1.04156	0.213192	0.204686	NA	NA	NA	NA	NA	NA
uc001bdw.1	HP1BP3	-0.0937757	90	0.281241	0.762886	-0.550921	0.385	0.8845	0.599988	0.396499	0.660846	NA	NA	NA	NA	NA	NA
uc001bef.3	EIF4G3	-0.00828655	116	0.913703	0.980115	-0.0391949	0.935	0.989861	0.28443	0.209046	0.734964	-0.199636	4.29355e-05	0.00158018	35	0.003	0.66785
uc001bei.2	ECE1	0.0345196	101	0.673975	0.928204	0.171356	0.712	0.966394	0.962041	0.209947	0.218231	-0.117203	0.0628187	0.225431	21	0.188	0.92064
uc001bet.3	ALPL	0.0700285	100	0.395806	0.827165	0.402518	0.434	0.902626	1.22129	0.262118	0.214624	-0.00689478	0.899433	0.953245	28	0.887	0.999167
uc001bew.3	RAP1GAP	0.0863924	91	0.318125	0.787714	0.497402	0.366	0.877277	0.274278	0.307583	1.12143	-0.00299734	0.951726	0.979173	34	0.814	0.997631
uc001bfb.3	USP48	-0.0679411	95	0.422239	0.838544	-0.374442	0.479	0.912484	0.692753	0.282955	0.40845	0.00054704	0.992	0.995768	28	0.9	0.999167
uc001bfg.1	LDLRAD2	0.137196	93	0.108915	0.63071	0.962914	0.134	0.780531	0.767471	0.64136	0.835679	-0.0217194	0.749576	0.87495	18	0.996	1
uc001bfj.3	HSPG2	0.0877228	121	0.24116	0.740202	0.617694	0.308	0.858241	1.2304	0.244759	0.198926	-0.00355126	0.947183	0.977454	29	0.867	0.999167
uc001bfk.3	CELA3B	0.139914	98	0.0931229	0.612732	1.03094	0.098	0.738204	1.65685	0.549118	0.331423	-0.00498532	0.925907	0.967239	29	0.685	0.98782
uc001bfr.3	CDC42	NA	NA	NA	NA	NA	NA	NA	NA	NA	NA	-0.108343	0.0150103	0.0902523	42	0.299	0.967325
uc001bfs.4	WNT4	0.0119352	40	0.928155	0.982128	0.0323797	NA	NA	0.804057	0.308803	0.384056	-0.139102	0.000511876	0.00937664	52	0.112	0.89294
uc001bfu.2	ZBTB40	-0.126728	119	0.0931579	0.612732	-1.03078	0.123	0.772936	0.998847	0.477982	0.478534	0.10664	0.00900348	0.064243	50	0.353	0.971468
uc001bfx.1	EPHA8	0.175316	101	0.0326282	0.505233	1.48641	0.044	0.645598	0.247464	0.828337	3.3473	0.15312	0.000587557	0.0104541	42	0.103	0.89294
uc001bfy.3	C1QA	0.0397689	109	0.614353	0.9134	0.211582	0.571	0.938566	0.798295	0.222333	0.27851	0.0821704	0.0382583	0.167134	53	0.338	0.971468
uc001bga.4	C1QC	0.0992317	105	0.217373	0.724984	0.662794	0.178	0.803259	1.27012	0.291381	0.229412	0.0769	0.0482208	0.192461	55	0.358	0.971468
uc001bgd.3	C1QB	0.0336193	108	0.671595	0.928204	0.172892	0.674	0.955853	1.01938	0.21254	0.2085	0.0711429	0.0651739	0.230564	56	0.42	0.971468
uc001bge.3	EPHB2	-0.0285938	71	0.771084	0.95347	-0.112898	0.743	0.970716	0.820123	0.251189	0.306282	0.0546416	0.0828158	0.26748	84	0.659	0.98782
uc001bgh.1	LOC729059	-0.0636925	91	0.461726	0.858248	-0.335615	0.468	0.909592	0.992738	0.248697	0.250517	NA	NA	NA	NA	NA	NA
uc001bgj.2	KDM1A	-0.0487338	53	0.669815	0.928117	-0.174045	NA	NA	0.835828	0.276217	0.330471	-0.0375528	0.523952	0.732978	24	0.627	0.985384
uc001bgn.3	HTR1D	0.182656	105	0.0231723	0.47177	1.63503	0.047	0.649558	0.430201	4.07217	9.46574	0.0521495	0.366411	0.608683	25	0.423	0.971468
uc001bgp.4	HNRNPR	-0.172033	31	0.256015	0.750976	-0.591735	NA	NA	1.1149	0.480637	0.431104	-0.0743308	0.158464	0.384011	30	0.445	0.971468
uc001bgt.3	ZNF436	-0.0532409	74	0.579991	0.904264	-0.236579	0.687	0.959665	1.09243	0.262533	0.240319	-0.104986	0.0501835	0.19624	29	0.238	0.954427
uc001bgw.3	C1orf213	-0.0582018	91	0.501228	0.874917	-0.299964	0.473	0.911402	0.472262	0.247526	0.524128	NA	NA	NA	NA	NA	NA
uc001bha.2	ASAP3	-0.0872106	111	0.264753	0.755468	-0.57716	0.254	0.845664	0.703462	0.320783	0.456006	-0.0705249	0.0584653	0.215511	60	0.4	0.971468
uc001bhe.2	E2F2	0.0240456	106	0.763905	0.951788	0.116961	0.762	0.972237	1.00545	0.207947	0.20682	-0.0705889	0.0902657	0.281121	48	0.392	0.971468
uc001bhh.4	ID3	-0.133218	43	0.295883	0.775943	-0.52888	NA	NA	NA	0.325627	NA	-0.0754535	0.0762915	0.254726	46	0.358	0.971468
uc001bhk.3	RPL11	NA	NA	NA	NA	NA	NA	NA	NA	NA	NA	-0.181857	0.014695	0.0890538	15	0.169339	0.919471
uc001bho.3	TCEB3	-0.056392	107	0.479084	0.865244	-0.319588	0.596	0.941005	1.35223	0.319003	0.235909	NA	NA	NA	NA	NA	NA
uc001bhq.3	PITHD1	-0.250361	39	0.0619842	0.554875	-1.20772	NA	NA	4.7634	1.48555	0.311868	NA	NA	NA	NA	NA	NA
uc001bht.3	LYPLA2	-0.0818368	32	0.58264	0.904818	-0.234599	NA	NA	0.893723	0.386789	0.432784	NA	NA	NA	NA	NA	NA
uc001bib.3	HMGCL	0.127641	100	0.121691	0.643895	0.914742	0.19	0.809909	1.84907	0.451622	0.244243	NA	NA	NA	NA	NA	NA
uc001bie.3	FUCA1	-0.0810364	111	0.300074	0.779183	-0.522771	0.281	0.84933	1.25998	0.383528	0.304393	NA	NA	NA	NA	NA	NA
uc001bif.3	CNR2	-0.0664528	108	0.402025	0.829447	-0.395747	0.461	0.909126	1.14179	0.23802	0.208463	NA	NA	NA	NA	NA	NA
uc001big.3	PNRC2	-0.0139845	65	0.891839	0.978669	-0.0497137	0.915	0.988138	0.798021	0.259699	0.325428	NA	NA	NA	NA	NA	NA
uc001bin.4	MYOM3	0.15309	118	0.0434316	0.523771	1.36219	0.032	0.6186	2.00661	0.671232	0.334511	-0.0071357	0.937696	0.972921	10	0.577621	0.982843
uc001biq.2	IL22RA1	-0.151182	115	0.0490191	0.533066	-1.30963	0.051	0.650755	2.02506	0.875999	0.432579	NA	NA	NA	NA	NA	NA
uc001bis.3	IFNLR1	-0.180751	112	0.0202342	0.465231	-1.69391	0.016	0.558555	2.87963	1.73737	0.603331	NA	NA	NA	NA	NA	NA
uc001bjc.3	STPG1	-0.175834	114	0.0226527	0.47177	-1.64488	0.029	0.608528	7.49281	2.02692	0.270515	0.0218635	0.683392	0.836426	29	0.546	0.980846
uc001bjh.3	NIPAL3	-0.0754434	100	0.3603	0.812385	-0.443336	0.342	0.873642	1.06393	0.25519	0.239856	0.00184801	0.973961	0.986692	26	0.68	0.98782
uc001bjj.3	RCAN3	0.0551998	86	0.535455	0.884994	0.271277	0.552	0.93185	0.696079	0.231343	0.332352	NA	NA	NA	NA	NA	NA
uc001bjk.2	NCMAP	0.0275999	86	0.756675	0.950714	0.121091	0.782	0.974428	0.98445	0.229397	0.233021	-0.100892	0.138139	0.357547	18	0.184	0.919505
uc001bjm.3	SRRM1	-0.0935983	95	0.268893	0.756312	-0.57042	0.372	0.881364	0.1617	0.330412	2.04337	-0.0864362	0.180565	0.410884	20	0.152	0.90469
uc001bjo.2	CLIC4	0.00888968	38	0.947878	0.986218	0.0232477	NA	NA	NA	0.318668	NA	-0.0681335	0.162643	0.388965	35	0.357	0.971468
uc001bjq.3	RUNX3	0.026422	76	0.780689	0.95628	0.107522	0.804	0.97597	0.63173	0.237601	0.376111	0.00175088	0.968277	0.985142	43	0.922	0.999167
uc001bjt.1	SYF2	-0.0499232	82	0.584403	0.905847	-0.233287	0.626	0.949313	1.39244	0.320399	0.2301	-0.0032473	0.968917	0.985142	12	0.984	0.999932
uc001bjw.3	C1orf63	0.143019	90	0.100307	0.619685	0.99867	0.137	0.783545	1.39682	0.309314	0.221442	NA	NA	NA	NA	NA	NA
uc001bjz.3	RHD	0.0727224	102	0.373063	0.817831	0.428218	0.358	0.876252	1.29264	0.272093	0.210493	NA	NA	NA	NA	NA	NA
uc001bke.3	TMEM50A	0.0694582	51	0.551367	0.891679	0.25856	NA	NA	0.923121	0.280464	0.303822	0.135563	0.137545	0.356838	10	0.286359	0.965635
uc001bkf.3	RHCE	0.0058706	110	0.940432	0.984027	0.0266726	0.942	0.989869	0.883603	0.206033	0.233174	0.126626	0.145726	0.367161	11	0.311871	0.971468
uc001bkk.3	TMEM57	0.0579485	51	0.619189	0.915406	0.208177	NA	NA	0.00607734	0.680042	111.898	0.0628652	0.318319	0.561534	21	0.637	0.985384
uc001bkl.4	LDLRAP1	0.015473	98	0.852684	0.970418	0.069212	0.847	0.982807	0.808636	0.220397	0.272554	-0.034544	0.479008	0.701148	35	0.524	0.980846
uc001bkm.2	MAN1C1	-0.0841144	102	0.302875	0.779445	-0.518736	0.328	0.863996	1.8107	0.407495	0.225049	-0.0743418	0.0561716	0.210138	55	0.28	0.962858
uc001bkq.4	MTFR1L	-0.0744184	73	0.442407	0.84757	-0.354178	0.501	0.918549	0.668799	0.29778	0.445246	-0.0169915	0.787374	0.895823	21	0.616	0.984961
uc001bkw.1	AUNIP	-0.119625	111	0.126082	0.644739	-0.899348	0.09	0.727574	1.5803	0.529067	0.33479	-0.0398435	0.517401	0.728302	22	0.543	0.980846
uc001bkx.3	PAQR7	-0.087654	92	0.308408	0.783748	-0.510875	0.253	0.844881	1.16853	0.313742	0.268494	-0.0518298	0.44623	0.67512	18	0.405	0.971468
uc001bld.4	PAFAH2	0.0100858	108	0.898792	0.978669	0.0463409	0.892	0.988023	0.865744	0.205653	0.237545	0.00594183	0.918033	0.962517	25	0.998	1
uc001blf.3	EXTL1	-0.135527	113	0.0803078	0.595844	-1.09524	0.071	0.694068	1.25463	0.492499	0.392544	-0.0502449	0.436354	0.667492	20	0.876	0.999167
uc001blg.1	SLC30A2	0.0285825	106	0.721071	0.942209	0.142022	0.684	0.958852	0.781777	0.205692	0.263108	-0.0827763	0.251402	0.493777	16	0.551	0.980846
uc001bli.2	TRIM63	0.136732	94	0.108181	0.63071	0.965851	0.157	0.793077	0.00966882	21.8943	2264.42	-0.0663559	0.329462	0.573255	18	0.64	0.985384
uc001blk.3	FAM110D	0.0288529	80	0.754933	0.950085	0.122092	0.794	0.975675	0.856132	0.240276	0.280654	-0.0785593	0.182486	0.412889	24	0.36	0.971468
uc001bll.4	ZNF593	0.12955	78	0.166528	0.688646	0.778513	0.184	0.808857	0.564948	0.324286	0.57401	-0.11404	0.0702551	0.242093	21	0.164	0.910728
uc001blm.4	CNKSR1	-0.0848579	112	0.275666	0.75937	-0.559617	0.257	0.847081	1.00194	0.286298	0.285744	-0.125683	0.0411477	0.174003	22	0.13	0.89294
uc001bls.1	CEP85	-0.0635369	105	0.429631	0.840103	-0.366904	0.432	0.90136	1.19834	0.273643	0.228351	-0.107473	0.0959318	0.29184	20	0.206	0.927633
uc001blu.3	SH3BGRL3	-0.0914283	20	0.633839	0.919351	-0.198021	NA	NA	0.985622	0.414264	0.420307	-0.176837	0.0338382	0.155938	12	0.096	0.89294
uc001blw.3	UBXN11	-0.171327	106	0.032349	0.505233	-1.49014	0.033	0.6186	4.36734	1.05183	0.24084	-0.103476	0.0731048	0.248121	25	0.211	0.931671
uc001bmc.3	CD52	-0.225137	74	0.0192774	0.46094	-1.71495	0.015	0.549704	6.99693	2.93855	0.419977	-0.0917351	0.112098	0.317931	25	0.31	0.971468
uc001bmd.4	AIM1L	0.0467597	117	0.539094	0.887177	0.268336	0.595	0.941005	0.425051	0.209865	0.493741	-0.0916955	0.105319	0.307647	26	0.338	0.971468
uc001bmj.3	LIN28A	-0.0990904	71	0.313311	0.786897	-0.504024	0.302	0.855547	1.48542	0.461264	0.310529	-0.0540483	0.29723	0.541763	31	0.677	0.98782
uc001bmk.3	DHDDS	-0.0896567	84	0.319987	0.789613	-0.494867	0.275	0.84933	1.37954	0.314322	0.227846	-0.0686433	0.142722	0.362473	38	0.504	0.977324
uc001bmp.4	HMGN2	0.0503234	27	0.757621	0.950714	0.120548	NA	NA	0.846114	0.35797	0.423076	-0.0692239	0.162061	0.388671	34	0.462	0.971468
uc001bms.1	RPS6KA1	0.00325953	84	0.971159	0.99281	0.0127098	0.969	0.995491	0.579291	0.244765	0.422524	-0.0482484	0.290512	0.533802	40	0.603	0.984961
uc001bmv.1	ARID1A	0.0645732	97	0.440757	0.846131	0.355801	0.537	0.927524	0.871215	0.237858	0.273019	-0.0384515	0.230669	0.469967	81	0.362	0.971468
uc001bmz.3	PIGV	0.0155199	110	0.843395	0.969228	0.0739689	0.86	0.984084	0.94963	0.20227	0.212998	-0.0539536	0.158263	0.383698	57	0.225	0.943362
uc001bnb.3	ZDHHC18	0.0261232	75	0.784539	0.956396	0.105385	0.797	0.975675	0.696808	0.252571	0.362468	-0.084315	0.0718036	0.245421	38	0.092	0.89294
uc001bnc.1	SFN	0.132713	69	0.183278	0.700609	0.73689	0.202	0.817764	0.191961	0.405004	2.10982	-0.0309527	0.563678	0.762098	29	0.465	0.971468
uc001bnd.1	GPN2	0.00729131	76	0.938757	0.983871	0.0274468	0.943	0.989869	0.993706	0.243384	0.244926	-0.0342868	0.552619	0.753083	25	0.551	0.980846
uc001bne.3	GPATCH3	-0.0298008	111	0.70314	0.936468	-0.152958	0.708	0.966052	0.729719	0.220535	0.302219	-0.00544559	0.936213	0.971943	18	0.913	0.999167
uc001bnf.3	NR0B2	0.160703	105	0.0457508	0.527951	1.3396	0.075	0.700831	1.0255	0.849409	0.828292	0.0846482	0.201208	0.435478	19	0.368	0.971468
uc001bng.2	NUDC	0.14825	91	0.0866903	0.604181	1.06203	0.127	0.774157	1.64428	0.676349	0.411335	0.0897501	0.164421	0.391328	20	0.314	0.971468
uc001bni.2	C1orf172	0.0141393	96	0.866652	0.974346	0.0621553	0.903	0.988138	0.759208	0.216955	0.285765	NA	NA	NA	NA	NA	NA
uc001bnj.4	TRNP1	0.139131	42	0.280888	0.7627	0.551468	NA	NA	1.58544	0.487778	0.307661	0.0127885	0.855072	0.931968	17	0.859	0.999167
uc001bnm.4	SLC9A1	-0.0327927	97	0.695428	0.934437	-0.157748	0.73	0.96847	0.920391	0.222408	0.241646	0.0361386	0.539699	0.744844	24	0.528	0.980846
uc001bnr.4	TMEM222	0.0842121	78	0.368499	0.815167	0.433564	0.404	0.889502	0.447705	0.271182	0.605716	-0.0452042	0.263484	0.506148	51	0.674	0.98782
uc001bnw.2	SYTL1	0	111	1	1	0	1	1	0.746253	0.206875	0.277218	-0.0477333	0.204093	0.438606	59	0.702	0.988837
uc001bny.1	MAP3K6	0.0951353	114	0.217505	0.725019	0.662531	0.269	0.848862	0.666915	0.249504	0.374116	-0.0450567	0.22671	0.465253	60	0.587	0.983271
uc001boa.3	FCN3	0.0285518	91	0.74145	0.946539	0.129918	0.799	0.975675	0.605884	0.220718	0.364291	-0.0450567	0.22671	0.465253	60	0.587	0.983271
uc001boc.3	CD164L2	-0.175112	89	0.0454274	0.527951	-1.34268	0.038	0.627182	1.97091	0.733076	0.371949	-0.0493135	0.171791	0.400462	64	0.496	0.976674
uc001bod.4	GPR3	0.00412131	84	0.963538	0.99086	0.0161311	0.978	0.997808	0.870789	0.242302	0.278255	-0.061248	0.0848009	0.270682	66	0.35	0.971468
uc001bof.2	WASF2	-0.148729	92	0.0839377	0.600273	-1.07604	0.101	0.739917	2.27088	0.717093	0.315777	-0.0977088	7.46876e-05	0.00239094	137	0.299	0.967325
uc001bom.3	FGR	-0.00995354	103	0.902483	0.978669	-0.0445609	0.9	0.988138	0.849498	0.217636	0.256193	-0.0896506	0.00190229	0.0234083	100	0.576	0.982301
uc001bon.1	IFI6	-0.102782	63	0.325403	0.790819	-0.487578	NA	NA	1.37469	0.373977	0.272045	-0.0680112	0.0657843	0.231892	61	0.66	0.98782
uc001bor.3	FAM76A	0.224434	48	0.0621649	0.554875	1.20645	NA	NA	2.11941	0.609352	0.28751	-0.00871759	0.923922	0.965989	10	0.655462	0.98782
uc001bou.4	STX12	-0.0657841	83	0.468314	0.861312	-0.329463	0.477	0.912406	0.290474	0.316195	1.08855	NA	NA	NA	NA	NA	NA
uc001bov.2	PPP1R8	-0.152842	42	0.236177	0.739894	-0.626762	NA	NA	1.72848	0.532221	0.307913	NA	NA	NA	NA	NA	NA
uc001bpc.4	THEMIS2	0.0368193	113	0.63469	0.919367	0.197438	0.648	0.953957	0.741652	0.202115	0.27252	NA	NA	NA	NA	NA	NA
uc001bpe.1	RPA2	-0.0451854	95	0.593518	0.908138	-0.226566	0.594	0.940921	1.06692	0.233622	0.218968	NA	NA	NA	NA	NA	NA
uc001bpg.3	SMPDL3B	0.0176118	110	0.822617	0.96411	0.0848024	0.816	0.976661	0.844684	0.21284	0.251975	NA	NA	NA	NA	NA	NA
uc001bph.1	XKR8	-0.125237	104	0.121324	0.64349	-0.916054	0.149	0.787424	1.07335	0.722896	0.673496	NA	NA	NA	NA	NA	NA
uc001bpi.2	EYA3	-0.107958	87	0.222775	0.728768	-0.652134	0.313	0.859317	1.30871	0.322062	0.246091	NA	NA	NA	NA	NA	NA
uc001bpl.3	PTAFR	0.104331	113	0.178191	0.69683	0.749114	0.22	0.829829	0.220654	0.331369	1.50176	NA	NA	NA	NA	NA	NA
uc001bpn.3	DNAJC8	0.102151	25	0.547838	0.890908	0.261348	NA	NA	NA	0.389615	NA	NA	NA	NA	NA	NA	NA
uc001bpq.3	ATPIF1	-0.147152	91	0.0890499	0.609858	-1.05037	0.089	0.727574	2.32877	0.786691	0.337814	NA	NA	NA	NA	NA	NA
uc001bps.3	SESN2	-0.0989748	96	0.239839	0.740202	-0.62008	0.306	0.857299	2.94284	0.63178	0.214684	NA	NA	NA	NA	NA	NA
uc001bpy.3	PHACTR4	-0.175536	112	0.0241343	0.475734	-1.61737	0.017	0.567829	3.08041	0.745664	0.242066	-0.217399	0.00483619	0.043359	14	0.012	0.782772
uc001bqf.2	RCC1	-0.0585769	96	0.486655	0.869402	-0.312779	0.547	0.929395	1.16433	0.282679	0.242783	-0.231191	0.00388304	0.0376622	13	0.008	0.782772
uc001bqi.3	TRNAU1AP	-0.0507153	39	0.705374	0.937012	-0.15158	NA	NA	1.04428	0.342571	0.328046	-0.25572	0.000395218	0.00789456	16	0.001	0.419228
uc001bqv.3	RAB42	-0.167499	83	0.0648109	0.560814	-1.18835	0.069	0.687555	0.712076	0.90235	1.26721	-0.234537	0.00236679	0.0271356	14	0.001	0.419228
uc001bqy.3	TAF12	0.255841	25	0.132264	0.653533	0.87856	NA	NA	6.85369	2.52095	0.367824	-0.232801	0.000884281	0.0137064	17	0	0.419228
uc001bra.3	GMEB1	-0.204631	63	0.0502408	0.533346	-1.29894	NA	NA	2.61737	0.79822	0.30497	-0.163461	0.00946544	0.0664849	21	0.006	0.71668
uc001brf.1	OPRD1	0.0786115	89	0.369108	0.815167	0.432847	0.347	0.874666	1.03885	0.236091	0.227262	0.0411696	0.39885	0.637423	35	0.486	0.97649
uc001brm.2	EPB41	0.0495884	108	0.531748	0.883592	0.274294	0.535	0.927524	1.06889	0.229453	0.214665	-0.045551	0.177651	0.407474	73	0.693	0.98825
uc001brn.2	TMEM200B	0.114021	69	0.252913	0.748594	0.59703	0.298	0.85472	1.82102	0.451442	0.247907	-0.121598	0.00852865	0.0621527	39	0.311	0.971468
uc001bro.3	SRSF4	-0.0175704	91	0.839106	0.967886	-0.0761829	0.866	0.984178	0.817233	0.234797	0.287308	-0.108602	0.0107299	0.0723404	46	0.362	0.971468
uc001brq.1	MECR	-0.0927941	109	0.239717	0.740202	-0.620302	0.256	0.847081	0.629174	0.40729	0.64734	-0.148554	0.00647098	0.0518451	28	0.166	0.913652
uc001bru.3	PTPRU	0.168866	101	0.0395887	0.511764	1.40243	0.076	0.701696	1.10325	0.295758	0.268079	-0.0979116	0.103829	0.305206	23	0.425	0.971468
uc001brz.3	MATN1	0.155862	108	0.0493548	0.533066	1.30667	0.037	0.627182	1.54952	0.580336	0.374526	NA	NA	NA	NA	NA	NA
uc001bsc.2	LAPTM5	-0.0484298	99	0.559061	0.895377	-0.252541	0.576	0.939039	0.911821	0.262562	0.287954	-0.000612245	0.993899	0.99684	13	0.783	0.994873
uc001bse.2	SDC3	0.0976663	100	0.23631	0.739894	0.626518	0.293	0.851578	0.88505	0.301241	0.340366	-0.0197877	0.721718	0.860998	27	0.926	0.999167
uc001bsh.1	PUM1	0.165599	62	0.116083	0.637071	0.935231	NA	NA	0.643137	0.706014	1.09777	-0.137292	0.0225621	0.118353	23	0.067	0.871054
uc001bso.3	SNRNP40	-0.138523	47	0.254867	0.750272	-0.593687	0.315	0.859317	1.09371	0.451864	0.413146	0.0892277	0.108268	0.312719	27	0.155	0.90469
uc001bsp.1	ZCCHC17	-0.186871	55	0.0955638	0.615742	-1.01971	NA	NA	1.1387	0.580907	0.510149	0.0862732	0.1138	0.320935	28	0.142	0.90025
uc001bss.1	FABP3	0.198139	74	0.0394457	0.511764	1.404	0.033	0.6186	0.0186366	2.12838	114.204	-0.0887458	0.330979	0.575057	10	0.262361	0.959755
uc001bta.3	TINAGL1	-0.107432	96	0.202019	0.717527	-0.694609	0.334	0.865501	0.968799	0.429027	0.442844	-0.134438	0.0289413	0.141331	22	0.068	0.871064
uc001bth.2	PEF1	-0.156646	92	0.0687161	0.570427	-1.16294	0.073	0.695591	3.19583	0.719425	0.225114	-0.103575	0.0232651	0.121277	40	0.244	0.957761
uc001btk.1	COL16A1	0.0838988	117	0.270461	0.756312	0.567896	0.226	0.831966	0.213657	0.504761	2.36248	-0.0535963	0.103317	0.304474	77	0.535	0.980846
uc001btn.3	BAI2	-0.0681802	105	0.396692	0.827846	-0.401547	0.488	0.913228	1.39329	0.291876	0.209487	NA	NA	NA	NA	NA	NA
uc001bts.1	SPOCD1	-0.154875	112	0.0466385	0.531328	-1.33126	0.068	0.687333	2.0883	1.2229	0.585598	-0.00272275	0.938929	0.973471	66	0.954	0.999167
uc001bty.2	PTP4A2	-0.0857493	18	0.673417	0.928204	-0.171716	NA	NA	NA	0.469674	NA	-0.0197076	0.654414	0.81781	43	0.94	0.999167
uc001bub.4	KHDRBS1	-0.166303	45	0.181457	0.699122	-0.741227	NA	NA	1.27796	0.552867	0.432618	-0.0903191	0.0319695	0.150379	47	0.145	0.90025
uc001bug.3	KPNA6	-0.152146	39	0.256699	0.750976	-0.590575	NA	NA	NA	0.583565	NA	-0.124462	0.0250766	0.127338	27	0.094	0.89294
uc001bui.3	TXLNA	-0.12984	99	0.11727	0.63792	-0.930813	0.106	0.749561	1.61937	0.663507	0.409732	-0.181257	0.0188087	0.104708	14	0.049	0.853977
uc001bul.1	CCDC28B	0.00699227	65	0.945794	0.985645	0.0242032	0.952	0.9914	0.999725	0.258904	0.258975	-0.197161	0.017987	0.101808	12	0.0601202	0.863874
uc001bum.2	IQCC	-0.233431	109	0.00310094	0.319931	-2.50851	0.004	0.379509	3.28385	6.72147	2.04683	-0.197161	0.017987	0.101808	12	0.0601202	0.863874
uc001bun.2	DCDC2B	-0.00604116	108	0.939274	0.983871	-0.0272078	0.947	0.99022	0.415851	0.203892	0.4903	-0.228726	0.012227	0.0787691	10	0.069255	0.872234
uc001buq.4	TMEM234	-0.108528	84	0.228665	0.733275	-0.640801	0.175	0.800229	1.66259	0.389407	0.234217	-0.251109	0.0039146	0.0378701	11	0.0282828	0.825992
uc001buw.3	FAM167B	-0.0601855	83	0.507008	0.877576	-0.294986	0.503	0.919363	0.817368	0.297762	0.364294	-0.15908	0.0115625	0.0760233	21	0.172	0.919505
uc001buy.3	LCK	-0.0800514	80	0.386476	0.823265	-0.412877	0.442	0.905248	0.899885	0.310655	0.345216	-0.0787693	0.16414	0.390833	26	0.543	0.980846
uc001bvb.1	HDAC1	-0.0368079	55	0.742685	0.946539	-0.129195	0.767	0.972237	1.27301	0.372339	0.292487	-0.0897268	0.106309	0.30914	27	0.397	0.971468
uc001bvd.4	MARCKSL1	-0.20458	65	0.0466766	0.531439	-1.3309	NA	NA	2.1594	0.606772	0.280992	-0.0897268	0.106309	0.30914	27	0.397	0.971468
uc001bvf.3	TSSK3	-0.0526516	71	0.592126	0.908138	-0.227586	0.724	0.967063	1.10448	0.310458	0.281089	-0.0621499	0.335653	0.579121	20	0.763	0.993422
uc001bvl.4	ZBTB8B	0.123675	99	0.135709	0.657047	0.867391	0.224	0.830535	0.838635	0.348391	0.415427	NA	NA	NA	NA	NA	NA
uc001bvn.3	ZBTB8A	-0.140335	92	0.102945	0.622465	-0.987397	0.223	0.830411	1.30175	0.565477	0.434396	NA	NA	NA	NA	NA	NA
uc001bvp.3	ZBTB8OS	0.177747	78	0.0576787	0.546693	1.23898	0.045	0.64677	0.742662	0.699304	0.941619	-0.195325	0.011353	0.0753438	14	0.037	0.841293
uc001bvr.3	RBBP4	NA	NA	NA	NA	NA	NA	NA	NA	NA	NA	-0.109616	0.0528539	0.202377	26	0.148	0.900343
uc001bvt.2	SYNC	-0.0469265	117	0.537648	0.88598	-0.269502	0.588	0.939686	0.614924	0.243655	0.396236	-0.109616	0.0528539	0.202377	26	0.148	0.900343
uc001bvu.1	KIAA1522	-0.0611366	109	0.438578	0.845069	-0.357953	0.488	0.913228	1.27291	0.272185	0.21383	-0.0725106	0.143041	0.36293	34	0.272	0.962758
uc001bvy.1	YARS	0.0967948	94	0.25545	0.750735	0.592695	0.257	0.847081	1.53403	0.353182	0.230232	-0.078968	0.076278	0.254726	42	0.243	0.957761
uc001bwc.4	S100PBP	-0.199308	110	0.011181	0.425255	-1.95152	0.051	0.650755	3.10978	2.50619	0.805907	-0.0413948	0.330811	0.574951	46	0.459	0.971468
uc001bwg.3	FNDC5	-0.0789256	75	0.408779	0.831666	-0.388511	0.438	0.903291	1.2503	0.318046	0.254377	0.0284517	0.602016	0.787255	28	0.655	0.98782
uc001bwh.3	HPCA	NA	NA	NA	NA	NA	NA	NA	NA	NA	NA	0.0184776	0.734847	0.86676	28	0.891	0.999167
uc001bwi.1	TMEM54	-0.0662402	101	0.419501	0.83784	-0.377267	0.413	0.894043	1.28281	0.273148	0.21293	0.0271845	0.612088	0.793156	29	0.775	0.994873
uc001bwp.2	AK2	0.250572	76	0.00828072	0.395115	2.08193	0.007	0.481133	15.3043	4.04	0.263979	0.0800108	0.239644	0.480529	18	0.445	0.971468
uc001bwr.3	ADC	0.0285833	109	0.717241	0.941177	0.144335	0.833	0.980392	0.647233	0.202922	0.313522	NA	NA	NA	NA	NA	NA
uc001bxb.3	TRIM62	0.0363528	47	0.765087	0.951838	0.116289	0.769	0.972237	1.07879	0.313751	0.290837	-0.00775055	0.911857	0.959411	17	0.867	0.999167
uc001bxc.1	ZNF362	0.101827	32	0.494125	0.872074	0.306164	NA	NA	0.984618	0.342451	0.347801	-0.068294	0.150163	0.373134	37	0.208	0.929628
uc001bxg.1	PHC2	-0.102148	110	0.193516	0.709717	-0.713282	0.211	0.825478	1.80551	0.364942	0.202127	-0.0609715	0.17109	0.399648	42	0.29	0.966111
uc001bxj.4	ZSCAN20	-0.139278	118	0.0661598	0.565207	-1.17941	0.118	0.764824	2.72093	0.804603	0.295709	0.0198435	0.764466	0.883414	19	0.908	0.999167
uc001bxn.1	CSMD2	0.167798	117	0.0275241	0.486865	1.56029	0.098	0.738204	0.409436	1.22143	2.9832	0.0754073	0.00200108	0.024181	140	0.199	0.925324
uc001bxp.3	HMGB4	0.0191701	99	0.817112	0.963066	0.0877182	0.824	0.978737	1.01892	0.225582	0.221393	0.0583534	0.190216	0.422258	42	0.45	0.971468
uc001bxt.3	C1orf94	0.0968256	113	0.211487	0.724458	0.674716	0.342	0.873642	0.619969	0.394797	0.636801	0.0450874	0.222563	0.460555	61	0.464	0.971468
uc001bxu.4	GJB5	0.0939141	106	0.240759	0.740202	0.618417	0.181	0.805747	0.259001	0.327962	1.26626	0.0325378	0.517336	0.728273	33	0.703	0.988837
uc001bxv.1	GJB4	0.223052	105	0.0055586	0.356567	2.25503	0.009	0.507049	26.8842	26.0636	0.969476	0.0325378	0.517336	0.728273	33	0.703	0.988837
uc001bxy.3	GJB3	-0.0104782	100	0.898897	0.978669	-0.0462901	0.914	0.988138	1.01266	0.218588	0.215854	-0.00218556	0.964276	0.983619	35	0.92	0.999167
uc001bya.3	GJA4	0.104208	89	0.233817	0.738511	0.631124	0.217	0.828823	1.16264	0.391083	0.336374	-0.0198915	0.70588	0.85075	30	0.934	0.999167
uc001byb.3	SMIM12	-0.0158837	47	0.896125	0.978669	-0.0476315	NA	NA	0.702071	0.289774	0.412742	0.0232473	0.593243	0.782883	44	0.801	0.996958
uc001byc.3	DLGAP3	-0.0544935	93	0.524294	0.881287	-0.280425	0.598	0.941279	1.0973	0.359631	0.327742	0.018096	0.664093	0.825194	48	0.8	0.996958
uc001bye.3	ZMYM6NB	-0.157288	79	0.0909016	0.609922	-1.04143	NA	NA	1.0515	0.753968	0.717041	0.0566896	0.245348	0.48779	35	0.618	0.984961
uc001byh.3	ZMYM6	-0.251586	110	0.00136273	0.283041	-2.86559	0.005	0.422541	7.37226	8.24472	1.11834	0.0670577	0.175602	0.405148	34	0.59	0.983271
uc001bym.3	ZMYM1	-0.272668	106	0.000659384	0.252855	-3.18086	0.005	0.422541	2.26361	8.63412	3.81432	-0.135162	0.0116923	0.0765245	29	0.33	0.971468
uc001bys.3	SFPQ	-0.150845	56	0.174448	0.693957	-0.758334	NA	NA	1.60572	0.47378	0.295058	-0.135954	0.0127042	0.0806932	28	0.405	0.971468
uc001byt.3	ZMYM4	-0.146513	100	0.0756406	0.586722	-1.12125	0.066	0.685948	0.925758	0.688719	0.743951	-0.116323	0.00335396	0.0341325	53	0.211	0.931671
uc001byx.3	KIAA0319L	0	114	1	1	0	1	1	0.916386	0.199166	0.217339	0.00206639	0.948957	0.97823	80	0.865	0.999167
uc001bza.3	NCDN	0.045627	68	0.64977	0.922498	0.187241	0.628	0.949738	1.24678	0.310661	0.24917	0.021772	0.537054	0.742797	67	0.711	0.989556
uc001bzf.2	PSMB2	0.0312999	53	0.784191	0.956396	0.105578	NA	NA	0.958988	0.279301	0.291246	0.0299516	0.368952	0.611255	75	0.665	0.98782
uc001bzh.1	C1orf216	0.0412722	101	0.614967	0.9134	0.211148	0.588	0.939686	1.0392	0.219031	0.210768	0.0583036	0.213152	0.448916	38	0.322	0.971468
uc001bzi.3	CLSPN	-0.125137	117	0.100246	0.619685	-0.998934	0.114	0.756657	1.93094	0.926303	0.479716	0.0312842	0.533605	0.74095	33	0.726	0.990245
uc001bzj.2	AGO4	-0.210251	37	0.127369	0.645544	-0.894935	NA	NA	1.43283	0.47285	0.330011	-0.105596	0.0385337	0.16761	32	0.11	0.89294
uc001bzl.3	AGO1	NA	NA	NA	NA	NA	NA	NA	0.954694	0.427584	0.447875	-0.183679	0.00284205	0.0305222	22	0.012	0.782772
uc001bzp.3	AGO3	-0.0362977	24	0.834532	0.966593	-0.0785572	NA	NA	0.906308	0.397476	0.438567	-0.119316	0.00985033	0.0685019	39	0.164	0.910728
uc001bzr.3	TEKT2	-0.048693	102	0.550893	0.891618	-0.258933	0.612	0.946618	1.08035	0.269132	0.249115	-0.05954	0.197759	0.431727	39	0.662	0.98782
uc001bzt.3	ADPRHL2	0.0503103	88	0.567667	0.898031	0.245906	0.535	0.927524	1.18585	0.301606	0.254337	-0.0684658	0.143758	0.363968	38	0.623	0.985384
uc001bzv.2	COL8A2	0.0764193	93	0.371892	0.817168	0.429584	0.337	0.868618	1.23242	0.268705	0.21803	-0.0622604	0.167307	0.394528	41	0.681	0.98782
uc001bzz.3	MAP7D1	-0.0434895	107	0.585178	0.905847	-0.232712	0.651	0.954648	1.03963	0.21872	0.210382	-0.0471612	0.313923	0.558003	38	0.825	0.997631
uc001cae.4	THRAP3	-0.0178159	98	0.830693	0.965786	-0.0805597	0.835	0.981028	1.02887	0.22906	0.222632	-0.0516302	0.225152	0.463531	46	0.776	0.994873
uc001caj.1	EVA1B	-0.0589832	79	0.526081	0.882568	-0.278948	0.55	0.931117	1.21231	0.283277	0.233668	-0.127685	0.0538631	0.205363	19	0.428	0.971468
uc001cak.1	STK40	0.0417014	71	0.671322	0.928204	0.173069	0.663	0.955853	0.967742	0.245065	0.253234	-0.126705	0.0625863	0.224848	18	0.35	0.971468
uc001cao.1	LSM10	0.0175534	56	0.874431	0.975974	0.0582743	NA	NA	1.02002	0.278344	0.272882	-0.174245	0.0239199	0.122928	14	0.204	0.925868
uc001caq.3	OSCP1	0.0185725	101	0.820931	0.963984	0.0856934	0.827	0.979501	1.01276	0.215267	0.212555	-0.0656882	0.308867	0.554261	20	0.539	0.980846
uc001cas.2	MRPS15	-0.0310978	108	0.694938	0.934397	-0.158054	0.699	0.963032	0.404881	0.238548	0.589179	0.00322902	0.959121	0.982394	21	0.919	0.999167
uc001cax.2	CSF3R	-0.214723	115	0.00517819	0.355111	-2.28582	0.032	0.6186	5.02088	3.35264	0.667739	0.0241265	0.658326	0.820744	28	0.675	0.98782
uc001caz.2	GRIK3	-0.056076	69	0.573925	0.902507	-0.241145	0.625	0.949006	0.987335	0.286086	0.289755	0.139776	7.08897e-09	1.52366e-06	143	0.071	0.879994
uc001cbb.4	ZC3H12A	-0.012081	112	0.876667	0.976358	-0.0571653	0.875	0.986458	0.867767	0.204324	0.235459	0.0275802	0.600785	0.786348	30	0.617	0.984961
uc001cbe.2	MEAF6	0.088066	27	0.589154	0.907195	0.229771	NA	NA	0.137397	0.359376	2.6156	0.00753699	0.868853	0.938141	40	0.922	0.999167
uc001cbi.4	SNIP1	-0.104736	102	0.199537	0.715708	-0.699976	0.279	0.84933	0.875861	0.395371	0.451409	-0.0322011	0.486071	0.705507	39	0.495	0.976674
uc001cbj.3	DNALI1	0.00137377	84	0.987842	0.997847	0.0053124	0.997	1	0.992592	0.229586	0.231299	-0.0393945	0.394115	0.633287	39	0.496	0.976674
uc001cbk.3	GNL2	-0.0943949	114	0.221106	0.728768	-0.6554	0.201	0.817764	1.28481	0.306327	0.238422	-0.0666858	0.121256	0.332763	45	0.368	0.971468
uc001cbm.2	RSPO1	0.00605968	96	0.942632	0.984451	0.025658	0.966	0.99462	1.00427	0.215679	0.214762	-0.0908585	0.0493631	0.194607	39	0.228	0.946341
uc001cbp.3	C1orf109	-0.0473779	100	0.56564	0.898031	-0.24746	0.584	0.939686	0.476181	0.258224	0.542282	-0.0606861	0.173102	0.401901	42	0.358	0.971468
uc001cbs.4	CDCA8	-0.176852	97	0.0347409	0.50821	-1.45916	0.038	0.627182	1.51193	1.15037	0.760863	-0.0732401	0.117845	0.326965	38	0.373	0.971468
uc001cby.2	MANEAL	0.112979	69	0.257278	0.751278	0.589597	0.237	0.834139	1.09679	0.419143	0.382155	-0.0975214	0.163667	0.390572	17	0.235	0.953785
uc001cca.1	YRDC	0.0357991	74	0.709815	0.938508	0.148855	0.768	0.972237	0.0316792	0.244643	7.72253	-0.0880357	0.195729	0.429565	18	0.295	0.967325
uc001ccd.2	C1orf122	0.0189466	40	0.886183	0.978069	0.0524765	NA	NA	1.02756	0.330941	0.322064	-0.0724529	0.30076	0.546193	17	0.423	0.971468
uc001cce.1	MTF1	0.0743009	104	0.358024	0.811025	0.446088	0.369	0.879424	0.96971	0.216263	0.223018	-0.0603948	0.361815	0.603952	19	0.429	0.971468
uc001ccg.1	INPP5B	0.0572853	116	0.453762	0.854215	0.343172	0.404	0.889502	0.498034	0.237246	0.476364	-0.0353316	0.359764	0.601918	56	0.857	0.999167
uc001cci.3	SF3A3	-0.0607177	31	0.6885	0.932686	-0.162096	NA	NA	1.0081	0.397107	0.393917	-0.0194478	0.598806	0.785301	61	0.939	0.999167
uc001cck.3	FHL3	-0.172547	66	0.0908372	0.609922	-1.04174	0.153	0.790032	1.75061	0.580313	0.331492	0.00669857	0.85049	0.929533	66	0.948	0.999167
uc001ccn.4	UTP11L	0.0123415	87	0.889155	0.978579	0.0510226	0.907	0.988138	0.699644	0.225384	0.322141	0.00643018	0.846048	0.926839	76	0.963	0.999167
uc001ccp.1	POU3F1	-0.119286	23	0.502335	0.875445	-0.299007	NA	NA	1.39486	0.552136	0.395837	0.0116971	0.713713	0.85619	82	0.973	0.999601
uc001ccq.3	RRAGC	0.0971429	50	0.409587	0.831666	0.387654	0.38	0.882918	0.576608	0.293624	0.509227	-0.0946036	0.0382167	0.167043	40	0.315	0.971468
uc001ccs.3	MYCBP	0.0585779	35	0.679988	0.929357	0.167498	NA	NA	NA	0.330067	NA	-0.0791325	0.126967	0.340729	31	0.361	0.971468
uc001ccu.1	RHBDL2	-0.0151609	100	0.854143	0.97113	-0.0684695	0.872	0.985493	0.865604	0.224897	0.259816	-0.105737	0.0485635	0.193152	29	0.292	0.966111
uc001ccw.3	AKIRIN1	-0.243104	60	0.023319	0.47177	-1.63229	0.035	0.622155	3.72572	1.45472	0.390452	-0.107788	0.113169	0.319787	18	0.205	0.926002
uc001ccy.3	NDUFS5	-0.116034	85	0.195361	0.710501	-0.709162	0.157	0.793077	1.33935	0.632642	0.472348	-0.0546986	0.276406	0.519798	33	0.307	0.971468
uc001cdi.3	BMP8A	0.217307	68	0.0305679	0.497146	1.51473	0.078	0.705834	1.56308	0.584627	0.374023	-0.00703105	0.866008	0.936536	48	0.962	0.999167
uc001cdl.2	PABPC4	0.0520604	66	0.609908	0.911822	0.214736	NA	NA	0.0733816	0.312973	4.265	0.0315036	0.543461	0.746941	31	0.517	0.980127
uc001cdp.3	HEYL	-0.0681634	98	0.41333	0.833611	-0.383703	0.451	0.906396	1.23844	0.295477	0.238588	-0.00773453	0.895574	0.95147	24	0.931	0.999167
uc001cdq.1	NT5C1A	0.224084	82	0.014085	0.432546	1.85124	0.02	0.571719	0.542555	1.23482	2.27593	-0.0201666	0.760747	0.881536	19	0.778	0.994873
uc001cdr.3	HPCAL4	0	15	1	1	0	NA	NA	0.138535	0.574997	4.15055	0.0385189	0.605316	0.788861	15	0.446	0.971468
uc001cdw.3	PPIE	-0.0174829	72	0.857795	0.971984	-0.0666166	0.861	0.984178	0.987301	0.256626	0.259927	-0.00843045	0.893541	0.949874	21	0.919	0.999167
uc001cdz.1	BMP8B	-0.0937173	63	0.369885	0.815595	-0.431933	NA	NA	1.64737	0.42364	0.257161	-0.0225802	0.68443	0.8368	27	0.867	0.999167
uc001ceb.1	OXCT2	-0.0076709	76	0.935575	0.983438	-0.0289212	0.953	0.9914	0.946909	0.239328	0.252746	-0.0318002	0.640249	0.810069	18	0.691	0.98825
uc001cer.2	MYCL1	0.102005	96	0.225754	0.731783	0.646365	0.313	0.859317	1.33909	0.313455	0.234081	NA	NA	NA	NA	NA	NA
uc001cev.3	MFSD2A	-0.0208681	97	0.803255	0.959409	-0.0951464	0.8	0.975675	0.721217	0.22879	0.317228	-0.0127757	0.78501	0.895062	38	0.96	0.999167
uc001cey.4	CAP1	0.253571	89	0.00376652	0.328714	2.42406	0.001	0.200844	30.3149	28.7388	0.948009	-0.0254661	0.686031	0.83779	21	0.862	0.999167
uc001cfb.2	PPT1	-0.0533842	95	0.528307	0.88265	-0.277114	0.571	0.938566	0.622664	0.287623	0.461923	0.0178915	0.81662	0.910388	14	0.647	0.985384
uc001cfc.4	RLF	-0.27901	107	0.000462019	0.252855	-3.33534	0.007	0.481133	8.05202	20.323	2.52396	NA	NA	NA	NA	NA	NA
uc001cfe.2	TMCO2	-0.0874484	107	0.272394	0.757517	-0.564802	0.464	0.909592	1.88193	0.477542	0.253752	NA	NA	NA	NA	NA	NA
uc001cfg.4	ZMPSTE24	-0.0851563	87	0.336211	0.796873	-0.473388	0.365	0.877191	1.30735	0.319947	0.24473	-0.11409	0.103209	0.304212	17	0.008	0.782772
uc001cfh.1	COL9A2	0.229217	111	0.00337683	0.32237	2.47149	0.005	0.422541	0.00149703	108.459	72449.1	-0.126148	0.0568152	0.211613	19	0.003	0.66785
uc001cfj.3	SMAP2	-0.0610661	81	0.506144	0.877452	-0.295726	0.546	0.929395	1.03925	0.274508	0.26414	-0.128725	0.0841697	0.269407	15	0.032	0.828045
uc001cfn.2	ZFP69B	-0.105886	93	0.215995	0.724458	-0.665556	0.258	0.847307	1.17074	0.364832	0.311625	-0.153743	0.0462958	0.187087	14	0.04	0.850463
uc001cfo.3	ZFP69	-0.0749141	105	0.351723	0.806997	-0.453799	0.431	0.900732	0.9241	0.541489	0.585964	-0.11575	0.164843	0.391868	12	0.098	0.89294
uc001cfp.3	EXO5	0.163455	107	0.0402159	0.511764	1.3956	0.068	0.687333	0.745086	0.953992	1.28038	NA	NA	NA	NA	NA	NA
uc001cft.2	ZNF684	-0.228583	94	0.00724105	0.374215	-2.1402	0.015	0.549704	1.43449	1.09546	0.763661	NA	NA	NA	NA	NA	NA
uc001cfu.1	RIMS3	-0.0714011	72	0.464299	0.859304	-0.333202	NA	NA	1.1678	0.284374	0.243512	-0.0188431	0.66865	0.827281	43	0.766	0.994466
uc001cgh.2	KCNQ4	0.129267	85	0.149144	0.671522	0.826395	0.154	0.792022	0.486048	0.475705	0.978722	0.048791	0.151576	0.375548	72	0.502	0.977324
uc001cgj.3	CITED4	-0.0235409	56	0.832156	0.966289	-0.0797951	NA	NA	0.349998	0.297343	0.849554	0.0656408	0.11148	0.317165	49	0.408	0.971468
uc001cgk.4	CTPS1	0.0155666	73	0.872348	0.975278	0.05931	0.874	0.986458	0.731599	0.243801	0.333244	0.104023	0.211941	0.447207	12	0.238	0.954427
uc001cgm.2	SLFNL1	0.0235017	113	0.761678	0.951627	0.118229	0.809	0.976521	0.988215	0.200123	0.20251	NA	NA	NA	NA	NA	NA
uc001cgs.3	SCMH1	-0.00706963	96	0.933091	0.983206	-0.0300759	0.919	0.988547	1.08442	0.240988	0.222227	0.11406	0.0162499	0.0952194	37	0.055	0.863874
uc001cgx.3	EDN2	-0.00834726	92	0.922728	0.981379	-0.0349263	0.918	0.988365	0.95411	0.218676	0.229194	0.142685	0.00395248	0.0380836	34	0.282	0.96433
uc001cha.4	HIVEP3	-0.0448193	114	0.561261	0.895377	-0.250835	0.608	0.944902	0.677187	0.208256	0.307531	0.0871709	0.00266401	0.0293319	99	0.261	0.959755
uc001chc.1	GUCA2B	-0.0581456	99	0.483025	0.867761	-0.31603	0.493	0.915825	0.753741	0.212229	0.281567	NA	NA	NA	NA	NA	NA
uc001chd.1	GUCA2A	0.0697688	101	0.395163	0.82715	0.403223	0.393	0.885066	1.18215	0.249888	0.211384	NA	NA	NA	NA	NA	NA
uc001chf.3	FOXJ3	0.2325	82	0.0108563	0.425255	1.96432	0.009	0.507049	1.60158	12.0307	7.51177	0.0625497	0.288481	0.531403	24	0.56	0.98175
uc001chi.2	RIMKLA	-0.0380679	83	0.674725	0.928204	-0.170874	0.667	0.955853	1.01439	0.234051	0.230731	0.0841426	0.216236	0.452691	18	0.507	0.977493
uc001chj.3	ZMYND12	0.0615913	100	0.455166	0.85504	0.34183	0.475	0.911625	0.883636	0.247809	0.280442	0.0974705	0.242153	0.483826	12	0.324	0.971468
uc001chl.3	PPCS	-0.108144	91	0.211419	0.724458	-0.674856	0.267	0.848573	0.36277	0.426106	1.17459	NA	NA	NA	NA	NA	NA
uc001chq.3	PPIH	NA	NA	NA	NA	NA	NA	NA	0.813476	0.542449	0.666828	0.156981	0.0499195	0.195887	13	0.203203	0.925868
uc001chs.3	YBX1	-0.0404784	31	0.789268	0.957892	-0.102775	NA	NA	NA	0.362253	NA	0.156981	0.0499195	0.195887	13	0.203203	0.925868
uc001cht.1	CLDN19	0.0690144	81	0.452417	0.853519	0.344461	0.518	0.924402	0.720876	0.255222	0.354044	0.169178	0.0423465	0.177076	12	0.262262	0.959755
uc001chx.4	LEPRE1	-0.109569	109	0.165065	0.687194	-0.782346	0.217	0.828823	1.47199	0.623942	0.423875	NA	NA	NA	NA	NA	NA
uc001cia.4	C1orf50	0.0273818	98	0.742445	0.946539	0.129335	0.755	0.971623	0.885798	0.213389	0.240901	0.169178	0.0423465	0.177076	12	0.262262	0.959755
uc001cib.2	CCDC23	-0.0624726	31	0.679988	0.929357	-0.167498	NA	NA	1.04719	0.413952	0.3953	NA	NA	NA	NA	NA	NA
uc001cie.1	ERMAP	-0.0225176	113	0.771374	0.953629	-0.112735	0.853	0.984011	0.741052	0.20449	0.275945	NA	NA	NA	NA	NA	NA
uc001cik.2	SLC2A1	0.104357	95	0.217689	0.725135	0.662164	0.298	0.85472	1.28915	0.295512	0.22923	-0.0538645	0.485086	0.705257	14	0.782	0.994873
uc001cit.4	C1orf210	0.0351736	91	0.68441	0.93117	0.164684	0.686	0.959482	0.570546	0.219731	0.385124	0.0732006	0.400351	0.638429	11	0.613911	0.984961
uc001ciu.3	TIE1	-0.0327859	116	0.668095	0.927391	-0.175162	0.777	0.973374	0.836578	0.224446	0.26829	0.0774985	0.333077	0.576714	13	0.558	0.98175
uc001ciw.3	MPL	-0.0808062	105	0.315139	0.786928	-0.501498	0.351	0.874954	0.782612	0.236935	0.302749	0.0774985	0.333077	0.576714	13	0.558	0.98175
uc001cix.3	CDC20	-0.0590722	84	0.512316	0.877828	-0.290462	0.602	0.942396	1.24624	0.283662	0.227614	0.0908429	0.239024	0.479721	14	0.501	0.977324
uc001cje.2	MED8	-0.0258202	95	0.760368	0.951568	-0.118976	0.771	0.972237	1.06875	0.234669	0.219574	0.0928014	0.161147	0.387484	19	0.45	0.971468
uc001cjk.3	SZT2	0.0540459	115	0.481627	0.867076	0.317289	0.588	0.939686	0.933692	0.215784	0.231109	0.070128	0.129266	0.343805	39	0.403	0.971468
uc001cjo.3	HYI	0.0984653	95	0.244787	0.742877	0.611212	0.315	0.859317	0.827737	0.235408	0.284399	0.0693464	0.155289	0.380514	35	0.391	0.971468
uc001cjr.3	PTPRF	0.0468626	112	0.547168	0.890368	0.261879	0.626	0.949313	1.01961	0.22559	0.221251	0.0539496	0.144431	0.364756	61	0.618	0.984961
uc001cjx.3	KDM4A	-0.0455347	111	0.560373	0.895377	-0.251523	0.643	0.953403	1.16367	0.23886	0.205264	0.02494	0.580155	0.774373	41	0.893	0.999167
uc001cjy.4	KDM4A-AS1	0.0428711	45	0.730486	0.944379	0.136388	NA	NA	1.00121	0.297325	0.296967	-0.0113651	0.856832	0.933184	21	0.836	0.997995
uc001cjz.4	ST3GAL3	-0.126892	76	0.181181	0.699122	-0.741887	0.217	0.828823	1.84011	0.478614	0.2601	-0.0107104	0.77941	0.89234	57	0.729	0.990245
uc001ckt.3	ARTN	-0.07695	61	0.469004	0.861427	-0.328823	NA	NA	1.09541	0.308747	0.281856	-0.0104639	0.807896	0.906166	45	0.859	0.999167
uc001ckx.3	IPO13	-0.101074	72	0.300246	0.779183	-0.522522	0.348	0.874666	0.888998	0.369146	0.415238	0.0004479	0.991696	0.995761	45	0.989	0.999932
uc001ckz.3	DPH2	0.0389381	106	0.626698	0.918184	0.202942	0.571	0.938566	0.797177	0.237682	0.298155	-0.00819374	0.854064	0.931181	42	0.939	0.999167
uc001cld.3	ATP6V0B	0.0474535	48	0.69332	0.933895	0.159066	NA	NA	0.882565	0.287344	0.325578	-0.00819374	0.854064	0.931181	42	0.939	0.999167
uc001clj.3	CCDC24	0.0237182	103	0.770314	0.952926	0.113332	0.747	0.971263	0.983691	0.208074	0.211524	0.0108638	0.80959	0.90647	41	0.922	0.999167
uc001cll.4	SLC6A9	0.127063	97	0.129276	0.647599	0.888482	0.103	0.744343	1.57804	0.351296	0.222616	0.00595026	0.896286	0.9521	40	0.949	0.999167
uc001clp.3	KLF17	-0.225198	96	0.00748692	0.380474	-2.1257	0.03	0.614503	4.82039	4.39133	0.91099	0.0120328	0.831691	0.918278	26	0.897	0.999167
uc001clq.1	DMAP1	0.0514567	55	0.646265	0.921879	0.189589	NA	NA	0.875482	0.272248	0.310969	0.111989	0.0020779	0.0247933	63	0.698	0.988837
uc001clt.3	ERI3	-0.130128	47	0.284799	0.766118	-0.545462	NA	NA	1.65798	0.483226	0.291455	0.0732196	0.00269607	0.0295049	140	0.689	0.988024
uc001clv.1	RNF220	-0.0186285	57	0.865596	0.974055	-0.0626847	NA	NA	0.100667	0.296029	2.94068	0.0541829	0.00932346	0.0660924	192	0.742	0.990296
uc001cmc.3	TMEM53	-0.0422618	102	0.604703	0.91092	-0.218458	0.632	0.950212	1.09254	0.23026	0.210756	0.0862443	0.0137644	0.085372	68	0.707	0.988848
uc001cmf.2	C1orf228	-0.0457674	107	0.565679	0.898031	-0.24743	0.582	0.939686	1.66263	0.340915	0.205045	0.0761017	0.0411693	0.174003	60	0.76	0.993422
uc001cmg.4	KIF2C	-0.12586	107	0.114182	0.63287	-0.942404	0.141	0.785053	1.07597	0.555253	0.516046	0.046308	0.371798	0.61362	31	0.769	0.994868
uc001cmi.3	RPS8	0.154529	19	0.433848	0.841881	0.362662	NA	NA	1.00024	0.404553	0.404455	-0.0472791	0.512404	0.725129	16	0.664	0.98782
uc001cmm.3	BEST4	-0.00807957	96	0.92356	0.981379	-0.0345348	0.915	0.988138	0.778882	0.214672	0.275616	0.0357047	0.620794	0.79815	16	0.71	0.988848
uc001cmn.3	PLK3	0.122933	97	0.1422	0.663647	0.8471	0.148	0.787424	0.741127	0.264772	0.357256	0.0279181	0.727323	0.862827	13	0.814	0.997631
uc001cmp.3	TCTEX1D4	0.0412448	105	0.608153	0.911316	0.215987	0.575	0.939039	0.36822	0.23261	0.631716	0.0241645	0.771841	0.887492	12	0.932	0.999167
uc001cmt.3	EIF2B3	-0.0821006	101	0.317029	0.787049	-0.498901	0.315	0.859317	0.739569	0.260023	0.351587	0.0917604	0.127414	0.341126	23	0.348	0.971468
uc001cna.2	UROD	0.0321593	89	0.713303	0.939578	0.146726	0.696	0.96207	1.06298	0.238865	0.224713	0.0372065	0.60618	0.788993	16	0.782	0.994873
uc001cnd.2	ZSWIM5	0.061531	103	0.448793	0.851691	0.347953	0.617	0.946618	1.02429	0.218166	0.212994	0.0723708	0.156163	0.381012	32	0.382	0.971468
uc001cne.3	HPDL	-0.0593823	104	0.462591	0.858248	-0.334802	0.489	0.913663	1.02429	0.275236	0.26871	0.0229536	0.728906	0.863701	19	0.593	0.983716
uc001cns.1	TESK2	-0.0449911	101	0.583473	0.905586	-0.233979	0.584	0.939686	1.02325	0.230949	0.225702	-0.00893313	0.869936	0.938646	28	0.92	0.999167
uc001cnw.3	CCDC163P	-0.00431801	92	0.959982	0.990295	-0.0177371	0.963	0.993913	0.6196	0.219241	0.353843	0.0372177	0.642048	0.811044	13	0.639	0.985384
uc001coe.3	AKR1A1	0.0439223	90	0.613775	0.9134	0.211991	0.631	0.950186	1.01086	0.233484	0.230976	-0.104728	0.160011	0.386424	15	0.259	0.959755
uc001coi.2	NASP	-0.0889259	109	0.259875	0.753181	-0.585235	0.289	0.85091	1.10499	0.286615	0.259382	-0.178785	0.0255505	0.128993	13	0.0713568	0.879994
uc001coq.3	GPBP1L1	0.0517632	98	0.534452	0.884778	0.272091	0.59	0.939686	0.83688	0.217833	0.260292	-0.098853	0.256077	0.498787	11	0.179775	0.919505
uc001cor.1	TMEM69	0.0284618	103	0.726071	0.942904	0.139021	0.7	0.96338	1.01043	0.210769	0.208594	NA	NA	NA	NA	NA	NA
uc001cou.3	IPP	0.0249919	82	0.784227	0.956396	0.105558	0.811	0.976661	1.01547	0.237961	0.234335	NA	NA	NA	NA	NA	NA
uc001cov.3	MAST2	-0.0490882	112	0.528302	0.88265	-0.277118	0.585	0.939686	1.03341	0.21495	0.208001	-0.0364655	0.468075	0.692526	33	0.562	0.981893
uc001cpb.4	PIK3R3	-0.145806	65	0.156269	0.678636	-0.806128	0.267	0.848573	0.75392	0.540236	0.716569	0.0303184	0.511924	0.725042	39	0.763	0.993422
uc001cpd.3	TSPAN1	0.0539401	107	0.498404	0.873852	0.302419	0.506	0.920148	0.592191	0.219065	0.369923	0.0343399	0.481608	0.702836	35	0.724	0.990245
uc001cpg.3	POMGNT1	0.0123891	104	0.878194	0.976446	0.0564095	0.886	0.987199	0.89472	0.210271	0.235013	0.0228004	0.640328	0.810069	35	0.989	0.999932
uc001cpn.3	LRRC41	-0.279367	80	0.00250871	0.307472	-2.60055	0.041	0.637892	8.87334	4.19192	0.472418	NA	NA	NA	NA	NA	NA
uc001cpp.3	UQCRH	0.128223	64	0.216145	0.724458	0.665256	0.231	0.833035	0.64605	0.300067	0.464464	NA	NA	NA	NA	NA	NA
uc001cpr.2	NSUN4	-0.0201976	105	0.801756	0.959409	-0.0959578	0.764	0.972237	0.308921	0.211316	0.684045	0.067727	0.306487	0.55171	19	0.966	0.999167
uc001cpu.2	FAAH	0.100583	110	0.200433	0.717154	0.698031	0.181	0.805747	0.841243	0.299593	0.356132	0.0703791	0.109911	0.314981	43	0.81	0.997631
uc001cpx.3	DMBX1	-0.0245744	82	0.787745	0.957462	-0.103614	0.828	0.979501	1.07921	0.249099	0.230815	0.0729295	0.0386701	0.167841	67	0.628	0.985384
uc001cpy.2	KNCN	-0.206723	76	0.0293806	0.493481	-1.53194	NA	NA	2.37456	1.34484	0.566356	0.0754287	0.0299907	0.144486	69	0.593	0.983716
uc001cqb.4	MKNK1	0.00198744	97	0.98107	0.996248	0.00829994	0.991	0.999923	0.99785	0.214336	0.214798	0.0676953	0.0422947	0.177076	75	0.536	0.980846
uc001cqe.4	MOB3C	-0.0517711	91	0.549675	0.891421	-0.259894	0.561	0.935504	0.302352	0.2692	0.890352	0.0518324	0.233681	0.473828	44	0.498	0.976674
uc001cqh.4	ATPAF1	0.0623355	85	0.486658	0.869402	0.312776	0.502	0.91864	1.02937	0.234901	0.228198	0.0608287	0.20615	0.440656	36	0.384	0.971468
uc001cqj.3	TEX38	0.0322715	98	0.698535	0.934837	0.155812	0.685	0.959472	1.14857	0.245772	0.213981	0.0598492	0.264243	0.506729	29	0.528	0.980846
uc001cqk.4	EFCAB14	-0.0501758	106	0.530822	0.883148	-0.275051	0.554	0.933088	0.728376	0.262123	0.359873	0.0589601	0.279828	0.523429	28	0.505	0.977324
uc001cqn.4	CYP4B1	0.217997	107	0.00621767	0.370124	2.20637	0.032	0.6186	0.0180106	15.4816	859.582	NA	NA	NA	NA	NA	NA
uc001cqp.4	CYP4A11	0.15965	106	0.0461289	0.528257	1.33603	0.163	0.793077	1.30956	0.330362	0.25227	NA	NA	NA	NA	NA	NA
uc001cqt.3	CYP4X1	-0.0880411	109	0.264647	0.755468	-0.577333	0.47	0.909592	1.09315	0.284919	0.26064	NA	NA	NA	NA	NA	NA
uc001cqu.1	CYP4Z1	0.0125896	77	0.893754	0.978669	0.0487822	0.922	0.989159	1.03668	0.245715	0.237021	NA	NA	NA	NA	NA	NA
uc001cqv.1	CYP4A22	0.212832	78	0.0230379	0.47177	1.63756	0.054	0.663312	3.02499	0.977178	0.323035	-0.0594506	0.475603	0.698546	12	0.702703	0.988837
uc001cqw.3	PDZK1IP1	0.0921076	86	0.301114	0.779228	0.521269	0.326	0.86239	1.09715	0.613485	0.559165	-0.0778154	0.371315	0.613309	11	0.599398	0.984961
uc001cqx.2	TAL1	0.0260189	56	0.814794	0.962152	0.0889522	NA	NA	0.945244	0.270392	0.286055	-0.0984414	0.237495	0.478006	12	0.593594	0.983957
uc001crd.1	STIL	-0.10124	116	0.185508	0.701394	-0.731637	0.199	0.815889	0.367211	0.299524	0.815671	0.0261313	0.671152	0.828659	22	0.84	0.999167
uc001cri.3	CMPK1	-0.167515	80	0.0699494	0.574051	-1.15522	0.078	0.705834	0.780372	0.504344	0.646287	0.0723267	0.192977	0.426415	27	0.423	0.971468
uc001crk.3	FOXE3	0.0988826	45	0.426877	0.839387	0.369697	NA	NA	0.95773	0.295788	0.308843	0.0588819	0.214738	0.451068	37	0.61	0.984961
uc001crm.3	FOXD2	-0.00216113	61	0.983775	0.996633	-0.00710417	0.991	0.999923	0.993581	0.267687	0.269416	0.0592255	0.183678	0.414435	42	0.717	0.990043
uc001crn.2	SLC5A9	0.0575924	108	0.46767	0.860877	0.33006	0.527	0.926321	0.807184	0.253838	0.314474	NA	NA	NA	NA	NA	NA
uc001crr.2	SPATA6	-0.0269876	92	0.753821	0.950085	-0.122731	0.748	0.971263	1.00799	0.230797	0.228968	0.10404	0.0611183	0.221708	27	0.163	0.910192
uc001cru.2	AGBL4	-0.0757722	91	0.38125	0.820565	-0.41879	0.444	0.905436	1.01474	0.282883	0.278774	0.0552118	0.000627212	0.010874	320	0.123	0.89294
uc001crx.4	BEND5	0.0256667	53	0.822311	0.96411	0.084964	0.864	0.984178	0.766444	0.277338	0.36185	0.142838	5.12819e-05	0.00181286	67	0.067	0.871054
uc001csb.2	ELAVL4	-0.0262296	19	0.894318	0.978669	-0.048508	NA	NA	1.05143	0.430956	0.409876	0.0114342	0.639387	0.809719	140	0.637	0.985384
uc001cse.1	FAF1	0.042512	83	0.639308	0.920493	0.19429	0.625	0.949006	0.923523	0.229945	0.248987	-0.0176119	0.539854	0.744871	101	0.776	0.994873
uc001csg.3	CDKN2C	-0.2279	60	0.0334775	0.506092	-1.47525	NA	NA	4.03102	1.16855	0.289889	-0.106774	0.127259	0.340994	17	0.372	0.971468
uc001csh.3	C1orf185	-0.217217	87	0.0141649	0.43299	-1.84879	0.017	0.567829	7.28023	2.84929	0.391373	NA	NA	NA	NA	NA	NA
uc001csi.4	RNF11	NA	NA	NA	NA	NA	NA	NA	NA	0.615699	NA	-0.251601	0.00384483	0.0373816	11	0.0120724	0.782772
uc001csq.1	EPS15	0.028993	107	0.715939	0.940429	0.145124	0.77	0.972237	0.936161	0.204619	0.218573	0.00937027	0.839372	0.923079	39	0.825	0.997631
uc001csu.3	OSBPL9	0.0373239	79	0.688281	0.932686	0.162234	0.685	0.959472	0.950223	0.233801	0.246048	0.096827	0.0813673	0.265044	27	0.164	0.910728
uc001ctc.4	NRD1	-0.0714584	109	0.365268	0.813909	-0.437388	0.388	0.885066	1.13808	0.278645	0.244838	-0.0350735	0.606233	0.788993	18	0.703	0.988837
uc001cth.3	RAB3B	-0.0205136	59	0.849515	0.9702	-0.0708287	0.855	0.984042	0.641586	0.288347	0.449429	-0.107082	0.0891662	0.27899	21	0.335	0.971468
uc001cti.4	TXNDC12	-0.0586164	74	0.542344	0.887537	-0.265725	0.555	0.933305	0.47987	0.302122	0.629591	-0.0893565	0.137691	0.35696	23	0.519	0.980523
uc001ctj.1	KTI12	-0.097028	101	0.237005	0.740103	-0.625242	0.211	0.825478	1.10154	0.320565	0.291016	-0.097767	0.13989	0.358966	19	0.46	0.971468
uc001ctk.3	BTF3L4	NA	NA	NA	NA	NA	NA	NA	NA	NA	NA	-0.0612118	0.41152	0.64726	15	0.782	0.994873
uc001cto.4	ZFYVE9	-0.0399555	112	0.607756	0.911316	-0.216271	0.666	0.955853	0.668003	0.230978	0.345774	-0.117003	0.0519293	0.200657	23	0.112	0.89294
uc001ctq.2	CC2D1B	-0.0939906	112	0.227267	0.733183	-0.643463	0.186	0.808938	1.42449	0.315217	0.221284	-0.142188	0.0488207	0.193566	16	0.052	0.863304
uc001ctu.3	ORC1	-0.164378	113	0.0339032	0.506262	-1.46976	0.038	0.627182	3.59553	1.2126	0.337253	NA	NA	NA	NA	NA	NA
uc001ctv.4	PRPF38A	NA	NA	NA	NA	NA	NA	NA	NA	NA	NA	NA	NA	NA	NA	NA	NA
uc001cty.2	ZCCHC11	-0.176574	114	0.0220887	0.47177	-1.65583	0.057	0.665408	0.831689	1.07247	1.28951	-0.0662928	0.358328	0.600629	16	0.764	0.993422
uc001cue.3	GPX7	0.131192	75	0.169732	0.690932	0.770237	0.164	0.793077	0.71928	0.503038	0.699363	0.0174254	0.821316	0.912636	14	0.505	0.977324
uc001cuf.3	FAM159A	0.0217579	85	0.808154	0.960653	0.0925056	0.818	0.976938	1.01985	0.254976	0.250013	0.0174254	0.821316	0.912636	14	0.505	0.977324
uc001cui.2	SELRC1	0.0656134	82	0.472223	0.86267	0.325853	0.461	0.909126	1.01266	0.238334	0.235355	NA	NA	NA	NA	NA	NA
uc001cuj.3	ZYG11B	0.0358333	60	0.738134	0.946069	0.131865	NA	NA	1.02026	0.269005	0.263663	NA	NA	NA	NA	NA	NA
uc001cuk.2	ZYG11A	-0.144722	106	0.0706469	0.576722	-1.15091	0.193	0.811955	1.73302	0.922927	0.532553	NA	NA	NA	NA	NA	NA
uc001cup.4	ECHDC2	-0.115246	90	0.185422	0.701394	-0.73184	0.131	0.776485	0.352086	0.340679	0.967602	NA	NA	NA	NA	NA	NA
uc001cur.2	SCP2	0.104501	105	0.19393	0.709717	0.712355	0.352	0.87533	1.4424	0.354969	0.246096	0.0278119	0.691203	0.841012	17	0.726	0.990245
uc001cuy.3	SLC1A7	0.115038	105	0.152706	0.674714	0.816143	0.147	0.787424	1.329	0.345618	0.260059	0.0323935	0.634024	0.805269	18	0.799	0.996958
uc001cvb.4	CPT2	-0.0270229	114	0.726126	0.942904	-0.138988	0.742	0.970716	0.806478	0.202141	0.250647	-0.0066397	0.904872	0.955677	27	0.891	0.999167
uc001cvd.3	C1orf123	-0.155341	63	0.1372	0.658498	-0.862647	0.163	0.793077	2.14676	0.552566	0.257396	0.00118723	0.982638	0.990475	28	0.96	0.999167
uc001cvf.2	MAGOH	NA	NA	NA	NA	NA	NA	NA	1	0.652095	0.652095	0.00790809	0.88475	0.947171	28	0.938	0.999167
uc001cvi.2	LRP8	0.0841235	111	0.282039	0.763173	0.549691	0.297	0.85472	1.41598	0.380382	0.268635	0.0204811	0.657734	0.820385	39	0.938	0.999167
uc001cvq.1	DMRTB1	-0.0384514	87	0.664118	0.925289	-0.177755	0.64	0.953067	0.866499	0.225501	0.260243	-0.0802578	0.0621979	0.223951	45	0.211	0.931671
uc001cvr.1	GLIS1	-0.11389	110	0.147142	0.670035	-0.832263	0.235	0.833167	1.01339	0.430564	0.424874	-0.140573	3.01148e-06	0.000226775	92	0.097	0.89294
uc001cvs.3	NDC1	-0.0380044	103	0.639911	0.920493	-0.19388	0.68	0.956975	0.426108	0.216779	0.508742	-0.14117	0.0025751	0.0287072	38	0.146	0.90025
uc001cvu.3	YIPF1	-0.120965	87	0.171916	0.691729	-0.764683	0.186	0.808938	2.0061	0.576702	0.287475	-0.0723016	0.406162	0.643068	11	0.876289	0.999167
uc001cwb.3	DIO1	-0.164914	94	0.0526818	0.537577	-1.27834	0.069	0.687555	0.483384	0.676263	1.39902	NA	NA	NA	NA	NA	NA
uc001cwh.3	HSPB11	-0.0900398	82	0.323895	0.790819	-0.489596	0.32	0.859614	1.54864	0.357247	0.230685	NA	NA	NA	NA	NA	NA
uc001cwj.2	LRRC42	-0.0440129	92	0.609039	0.911436	-0.215355	0.717	0.966394	0.562073	0.276981	0.492784	-0.0565353	0.497512	0.713959	12	0.996	1
uc001cwm.2	LDLRAD1	0.099763	101	0.224047	0.729715	0.649661	0.194	0.812625	1.43977	0.353904	0.245806	-0.0395235	0.530402	0.73854	21	0.454	0.971468
uc001cwp.3	TMEM59	0.132533	82	0.146489	0.669896	0.834194	0.186	0.808938	0.461963	0.528091	1.14315	-0.0158882	0.796296	0.900589	22	0.569	0.981893
uc001cwt.1	TCEANC2	-0.125428	85	0.161599	0.682626	-0.791562	0.182	0.806022	0.842559	0.476524	0.565567	-0.0490615	0.41505	0.64985	23	0.355	0.971468
uc001cwv.2	CDCP2	-0.103418	111	0.186007	0.701394	-0.73047	0.132	0.776485	2.04886	0.546545	0.266756	-0.0769381	0.174166	0.403451	26	0.244	0.957761
uc001cxa.4	MRPL37	-0.0409313	107	0.607441	0.911316	-0.216496	0.596	0.941005	0.983835	0.214572	0.218097	-0.0425371	0.312438	0.557504	47	0.596	0.984337
uc001cxe.4	SSBP3	0.0912415	14	0.697092	0.934499	0.15671	NA	NA	1.03288	0.472394	0.457354	-0.066343	0.0105085	0.0713356	124	0.349	0.971468
uc001cxl.2	ACOT11	0.0466481	101	0.569687	0.89899	0.244364	0.592	0.940064	0.692764	0.223235	0.322238	0.00667987	0.909748	0.958371	24	0.971	0.999401
uc001cxn.3	FAM151A	-0.0443422	107	0.577842	0.903341	-0.238191	0.552	0.93185	1.01444	0.250731	0.247161	NA	NA	NA	NA	NA	NA
uc001cxx.4	TTC4	-0.0526639	106	0.510647	0.877828	-0.291879	0.494	0.916802	1.07853	0.225297	0.208893	-0.10505	0.249835	0.492054	10	0.469512	0.971468
uc001cxy.3	PARS2	0.125348	113	0.105759	0.627666	0.975682	0.141	0.785053	0.183989	3.36421	18.2849	-0.10505	0.249835	0.492054	10	0.469512	0.971468
uc001cyb.4	C1orf177	0.0334277	108	0.673358	0.928204	0.171754	0.67	0.955853	0.583057	0.210002	0.360174	-0.075031	0.411129	0.646908	10	0.503575	0.977324
uc001cyc.1	DHCR24	0.132069	79	0.155727	0.678247	0.807637	0.169	0.798041	1.80252	0.450267	0.249798	NA	NA	NA	NA	NA	NA
uc001cyd.3	TMEM61	0.0396915	96	0.637382	0.920415	0.1956	0.68	0.956975	1.0559	0.226657	0.214658	NA	NA	NA	NA	NA	NA
uc001cye.3	BSND	0.0136843	106	0.864277	0.973572	0.0633471	0.858	0.984084	0.904846	0.206383	0.228086	NA	NA	NA	NA	NA	NA
uc001cyf.2	PCSK9	-0.0685851	79	0.460995	0.858248	-0.336304	0.512	0.921993	0.93649	0.306322	0.327095	NA	NA	NA	NA	NA	NA
uc001cyj.2	PPAP2B	-0.0329208	79	0.723443	0.942904	-0.140596	0.796	0.975675	1.10893	0.259666	0.234158	-0.0563556	0.104922	0.306902	69	0.296	0.967325
uc001cyk.4	PRKAA2	-0.0198793	72	0.838555	0.967752	-0.0764686	0.864	0.984178	0.658508	0.25801	0.39181	-0.0176889	0.745766	0.873055	28	0.62	0.984961
uc001cym.4	C1orf168	-0.217641	111	0.00538363	0.355471	-2.26892	0.005	0.422541	8.08638	4.81714	0.595711	0.0753966	0.127796	0.341751	34	0.244	0.957761
uc001cyo.2	C8A	-0.00672385	108	0.932427	0.983206	-0.0303852	0.926	0.989275	0.843658	0.205339	0.243391	0.134284	0.000396627	0.00791291	58	0.045	0.850463
uc001cyp.3	C8B	-0.0630111	110	0.422514	0.838544	-0.374159	0.36	0.876431	1.24383	0.294374	0.236667	0.116799	0.000652373	0.0110603	71	0.065	0.867588
uc001cys.1	DAB1	0.0988577	78	0.291111	0.771143	0.535941	0.343	0.874031	0.8626	0.262156	0.303914	0.0315625	0.0122303	0.0787691	526	0.669	0.98782
uc001cyy.3	OMA1	-0.10283	113	0.184517	0.700609	-0.733963	0.206	0.820446	1.57791	0.386768	0.245114	0.135068	0.00812952	0.0604186	32	0.101	0.89294
uc001cyz.4	TACSTD2	0.167765	86	0.0596444	0.549753	1.22443	0.101	0.739917	1.26606	1.10296	0.871173	0.0394351	0.622343	0.798485	13	0.664	0.98782
uc001cze.3	JUN	-0.0709895	53	0.534514	0.884778	-0.272041	0.571	0.938566	1.28958	0.366709	0.284364	-0.067615	0.120289	0.330957	44	0.599	0.984961
uc001czo.3	HOOK1	-0.00508095	102	0.950376	0.987447	-0.0221046	0.965	0.99462	1.02602	0.214814	0.209367	-0.0467222	0.409234	0.64498	26	0.402	0.971468
uc001czq.3	CYP2J2	0.0655413	110	0.404127	0.830607	0.393482	0.5	0.918549	0.974698	0.217083	0.222718	-0.0206063	0.700692	0.847222	29	0.797	0.996958
uc001czs.2	C1orf87	-0.0416299	115	0.587798	0.906446	-0.230772	0.665	0.955853	0.953921	0.215242	0.22564	-0.0114631	0.766366	0.884248	56	0.967	0.999167
uc001czz.1	TM2D1	0.126327	79	0.174505	0.693957	0.758192	0.154	0.792022	1.33215	0.377085	0.283066	-0.028089	0.564873	0.762626	35	0.776	0.994873
uc001dab.3	INADL	-0.112015	121	0.134479	0.65518	-0.871345	0.156	0.793077	0.279877	0.198162	0.70803	-0.0358952	0.343695	0.586926	58	0.639	0.985384
uc001dae.4	L1TD1	-0.0718095	56	0.517958	0.880597	-0.285705	NA	NA	0.709745	0.291241	0.410346	-0.0136197	0.841355	0.924198	18	0.868	0.999167
uc001dah.4	KANK4	0.00771775	111	0.921382	0.981379	0.0355602	0.923	0.989275	0.444754	0.218499	0.491281	0.0113787	0.878668	0.943835	15	0.612	0.984961
uc001dak.2	USP1	-0.0871706	102	0.285646	0.766118	-0.544171	0.389	0.885066	0.812728	0.288769	0.355308	-0.116814	0.179574	0.409787	11	0.29	0.966111
uc001daq.4	DOCK7	0.0970578	98	0.244093	0.742877	0.612444	0.317	0.859317	0.941619	0.400783	0.425632	-0.0044529	0.945004	0.97606	20	0.781	0.994873
uc001das.2	ANGPTL3	-0.0246669	103	0.761401	0.951598	-0.118387	0.773	0.972768	0.245139	0.232141	0.946979	NA	NA	NA	NA	NA	NA
uc001dau.3	ATG4C	0.116467	99	0.160017	0.682626	0.795834	0.207	0.822945	1.32161	0.363571	0.275098	0.159122	1.67226e-05	0.000790521	61	0.295	0.967325
uc001dax.2	FOXD3	-0.0480015	36	0.731544	0.944379	-0.135759	NA	NA	1.06395	0.356771	0.335325	0.0214247	0.618605	0.796534	45	0.931	0.999167
uc001dbb.2	ITGB3BP	-0.171691	96	0.041456	0.51791	-1.38241	0.04	0.63642	1.06819	0.71832	0.672462	-0.0344525	0.433889	0.665807	43	0.477	0.973752
uc001dbf.3	EFCAB7	-0.123908	112	0.11144	0.63223	-0.952959	0.149	0.787424	0.293363	0.346921	1.18256	-0.0369525	0.395858	0.634948	44	0.51	0.977493
uc001dbj.3	ROR1	-0.012597	83	0.88955	0.978579	-0.0508294	0.909	0.988138	0.997955	0.228696	0.229165	-0.0608468	0.00544288	0.046276	174	0.561	0.98175
uc001dbn.1	UBE2U	-0.164979	105	0.0402817	0.511764	-1.39489	0.055	0.665031	0.33355	1.0945	3.28138	-0.174743	0.000231563	0.0054177	37	0.113	0.89294
uc001dbo.1	CACHD1	0.0241205	84	0.789048	0.957892	0.102897	0.822	0.978165	0.770673	0.266945	0.346379	-0.0319027	0.28403	0.526998	94	0.868	0.999167
uc001dbs.2	RAVER2	-0.0246968	111	0.752142	0.94975	-0.1237	0.769	0.972237	0.938503	0.231021	0.246159	-0.117211	0.0568595	0.211631	22	0.364	0.971468
uc001dbu.1	JAK1	0.0191701	99	0.817112	0.963066	0.0877182	0.81	0.976661	0.79427	0.218272	0.274808	-0.055931	0.386244	0.625943	20	0.568	0.981893
uc001dby.3	AK4	-0.0946688	74	0.325111	0.790819	-0.487968	0.351	0.874954	0.839826	0.430969	0.513165	-0.0134209	0.827386	0.91574	22	0.786	0.995686
uc001dce.2	DNAJC6	-0.0284808	102	0.727201	0.943527	-0.138345	0.726	0.967559	1.11724	0.244441	0.21879	-0.0457779	0.501091	0.716988	18	0.554	0.981217
uc001dcf.3	LEPROT	0.112194	45	0.367321	0.814728	0.434955	NA	NA	0.0111884	0.307682	27.5001	-0.16409	0.048948	0.193831	12	0.202202	0.925868
uc001dci.3	LEPR	-0.142521	120	0.0579277	0.546693	-1.23711	0.096	0.737893	0.219894	0.930339	4.23085	-0.147978	0.0471129	0.189425	15	0.241241	0.957761
uc001dco.3	PDE4B	0.015113	92	0.860594	0.973039	0.0652019	0.876	0.986458	0.944392	0.219237	0.232146	-0.120416	4.38122e-05	0.00160148	96	0.131	0.89373
uc001dcr.3	SGIP1	0.0968474	96	0.250092	0.747372	0.601899	0.309	0.858241	0.0149937	0.495622	33.0553	-0.101683	0.037183	0.164667	35	0.309	0.971468
uc001dcv.3	TCTEX1D1	0.0696748	103	0.391071	0.825182	0.407744	0.431	0.900732	0.752607	0.294227	0.390943	NA	NA	NA	NA	NA	NA
uc001dcw.3	INSL5	-0.0927161	86	0.297932	0.776163	-0.525883	0.289	0.85091	1.16687	0.316254	0.271028	NA	NA	NA	NA	NA	NA
uc001dcx.3	WDR78	-0.173378	110	0.0273188	0.486865	-1.56354	0.059	0.667473	1.73497	0.972001	0.560241	NA	NA	NA	NA	NA	NA
uc001dde.2	MIER1	-0.0148354	85	0.868507	0.974449	-0.0612268	0.901	0.988138	0.587029	0.238744	0.4067	NA	NA	NA	NA	NA	NA
uc001ddk.2	SLC35D1	-0.0628422	71	0.522528	0.881196	-0.28189	0.568	0.937573	0.920683	0.247271	0.268574	NA	NA	NA	NA	NA	NA
uc001ddm.2	C1orf141	-0.172166	104	0.0331904	0.505457	-1.47899	0.068	0.687333	1.83208	2.18053	1.1902	NA	NA	NA	NA	NA	NA
uc001ddo.3	IL23R	-0.107277	111	0.170117	0.690932	-0.769253	0.174	0.800229	0.193571	0.436534	2.25516	-0.106788	0.242087	0.483813	10	0.548353	0.980846
uc001ddu.3	IL12RB2	-0.157445	116	0.0394934	0.511764	-1.40348	0.039	0.632217	0.532682	0.551443	1.03522	0.051709	0.460192	0.686497	17	0.345	0.971468
uc001ddv.3	SERBP1	-0.00838198	61	0.937132	0.983587	-0.0281991	0.931	0.989275	0.996474	0.284747	0.285755	0.0788483	0.306797	0.552067	14	0.253	0.959755
uc001ddz.2	GADD45A	-0.0865043	49	0.467449	0.860807	-0.330266	NA	NA	0.873864	0.317351	0.363158	-0.130614	0.0148324	0.0896754	29	0.206	0.927633
uc001dea.2	GNG12	0.107916	34	0.45426	0.854563	0.342695	NA	NA	0.399451	0.408774	1.02334	-0.0920788	0.0492825	0.194553	38	0.483	0.97649
uc001ded.3	DIRAS3	-0.210494	72	0.0309789	0.502088	-1.50893	NA	NA	1.38834	2.36409	1.70282	NA	NA	NA	NA	NA	NA
uc001dee.3	WLS	-0.085392	92	0.321059	0.789934	-0.493415	0.282	0.84933	0.820047	0.292303	0.356446	-0.182214	1.22665e-05	0.000631744	48	0.065	0.867588
uc001dei.1	RPE65	-0.0409163	77	0.664247	0.925289	-0.177671	0.698	0.962426	0.558211	0.244507	0.438019	-0.0446854	0.591811	0.782416	12	0.608	0.984961
uc001dem.4	DEPDC1	-0.121365	112	0.118977	0.642485	-0.924537	0.188	0.808991	1.08036	0.528698	0.48937	-0.154994	0.0528878	0.202442	13	0.131	0.89373
uc001dep.3	LRRC7	-0.0918965	98	0.270082	0.756312	-0.568504	0.317	0.859317	0.896976	0.307598	0.342928	-0.107892	0.0249383	0.126946	36	0.07	0.877504
uc001der.2	LRRC40	-0.0684904	110	0.383311	0.822083	-0.416449	0.446	0.905436	0.161179	0.27625	1.71393	-0.146071	0.0318143	0.150101	18	0.262	0.959755
uc001des.3	SRSF11	-0.20041	62	0.0572023	0.54601	-1.24259	0.084	0.719302	2.4715	0.945862	0.382707	-0.145909	0.0586036	0.215831	14	0.224	0.943181
uc001dex.4	ANKRD13C	-0.0317749	72	0.744682	0.946731	-0.128029	0.777	0.973374	1.16772	0.287972	0.24661	NA	NA	NA	NA	NA	NA
uc001dfd.3	CTH	-0.00951819	106	0.90536	0.979188	-0.0431786	0.908	0.988138	0.442367	0.20545	0.464432	NA	NA	NA	NA	NA	NA
uc001dfo.3	PTGER3	0.0554573	101	0.499122	0.874008	0.301794	0.673	0.955853	1.07152	0.230963	0.215548	-0.0589802	0.349145	0.59148	21	0.298	0.967325
uc001dft.3	ZRANB2	0.0148906	45	0.904761	0.979127	0.0434662	NA	NA	NA	0.29899	NA	-0.0392431	0.533322	0.740686	21	0.515	0.979047
uc001dfw.3	NEGR1	0.0340805	66	0.738381	0.946069	0.131719	0.753	0.971562	0.822318	0.271096	0.329673	-0.0605743	0.00102662	0.0151826	245	0.263	0.959755
uc001dfy.4	LRRIQ3	-0.172322	114	0.0255011	0.476766	-1.59344	0.069	0.687555	0.27938	1.84188	6.59273	-0.118878	0.0198377	0.109067	32	0.084	0.89294
uc001dge.2	FPGT-TNNI3K	0.0520169	107	0.513844	0.878263	0.289169	0.612	0.946618	1.00944	0.206549	0.204619	-0.0426864	0.133494	0.35002	103	0.52	0.980752
uc001dgg.3	C1orf173	-0.079623	116	0.297744	0.776133	-0.526157	0.312	0.858861	1.70092	0.42329	0.248859	NA	NA	NA	NA	NA	NA
uc001dgj.3	CRYZ	-0.0671732	101	0.412982	0.833417	-0.384069	0.398	0.887537	0.243515	0.285378	1.17191	-0.0559738	0.123838	0.336071	63	0.523	0.980846
uc001dgn.3	TYW3	-0.0774607	95	0.360196	0.812385	-0.443461	0.346	0.874666	0.506046	0.332823	0.657694	-0.0492625	0.156375	0.381176	69	0.643	0.985384
uc001dgu.3	SLC44A5	-0.220728	111	0.00476341	0.349258	-2.32208	0.058	0.665408	4.19188	5.41424	1.2916	-0.0705706	0.0394324	0.169824	71	0.393	0.971468
uc001dgy.2	RABGGTB	-0.0409565	67	0.685842	0.931814	-0.163776	0.709	0.966052	1.08534	0.272108	0.250712	NA	NA	NA	NA	NA	NA
uc001dhd.2	MSH4	0.0314117	111	0.687916	0.932686	0.162465	0.683	0.958493	1.07017	0.217657	0.203386	-0.0352532	0.625217	0.800254	16	0.998	1
uc001dhe.2	ASB17	0.0778001	81	0.39697	0.827846	0.401242	0.379	0.882317	1.02473	0.298155	0.290959	-0.0686324	0.357167	0.599868	15	0.797	0.996958
uc001dhh.2	ST6GALNAC3	-0.159384	76	0.0930522	0.612732	-1.03127	0.191	0.810597	1.88714	0.693289	0.367376	-0.0342609	0.0617247	0.223044	248	0.641	0.985384
uc001dhi.3	ST6GALNAC5	-0.0359748	88	0.682798	0.930442	-0.165708	0.695	0.961978	0.807192	0.237177	0.293829	-0.00319263	0.915076	0.960728	93	0.818	0.997631
uc001dhk.3	PIGK	-0.123048	88	0.162191	0.682772	-0.789974	0.19	0.809909	2.25923	0.677013	0.299665	0.0106703	0.810693	0.907148	42	0.981	0.999932
uc001dhn.3	AK5	0.0974754	105	0.225623	0.731754	0.646616	0.23	0.833035	1.00865	0.305933	0.303311	-0.143667	0.0465194	0.187722	16	0.13	0.89294
uc001dhq.3	ZZZ3	-0.123006	104	0.1281	0.646237	-0.892451	0.294	0.851603	1.28079	0.417942	0.326316	NA	NA	NA	NA	NA	NA
uc001dht.4	USP33	-0.0490896	99	0.553719	0.892926	-0.256711	0.587	0.939686	1.09042	0.245406	0.225056	NA	NA	NA	NA	NA	NA
uc001dic.4	NEXN	-0.0790112	102	0.333154	0.795148	-0.477354	0.396	0.886272	1.80156	0.380204	0.211041	-0.2494	7.15618e-06	0.000432051	27	0.015	0.788781
uc001dii.3	FUBP1	-0.19247	35	0.175326	0.695432	-0.756154	NA	NA	1.54538	0.634997	0.410901	-0.260271	4.2842e-06	0.000286185	26	0.012	0.782772
uc001dij.3	DNAJB4	-0.241885	75	0.0113543	0.425255	-1.94484	NA	NA	9.89417	4.79231	0.484357	-0.262437	2.31654e-06	0.000191501	27	0.02	0.788781
uc001dik.3	GIPC2	-0.10297	106	0.198372	0.713575	-0.70252	0.27	0.848862	1.57524	0.348717	0.221375	-0.259316	3.04923e-06	0.000226775	27	0.011	0.782772
uc001din.3	PTGFR	-0.0279719	95	0.741087	0.946539	-0.130131	0.733	0.9692	0.781705	0.257925	0.329952	-0.0463907	0.577748	0.772301	12	0.963	0.999167
uc001dip.4	IFI44	-0.165341	90	0.0574508	0.546693	-1.2407	0.039	0.632217	0.645804	0.755239	1.16946	-0.103459	0.118255	0.327314	19	0.072	0.879994
uc001diq.4	ELTD1	-0.171856	116	0.0246096	0.475734	-1.6089	0.027	0.601664	0.896899	1.24226	1.38506	NA	NA	NA	NA	NA	NA
uc001diu.3	LPHN2	0.0401512	92	0.640807	0.920493	0.193273	0.725	0.967146	0.767684	0.219192	0.285523	NA	NA	NA	NA	NA	NA
uc001djc.3	TTLL7	-0.191373	107	0.0163094	0.448551	-1.78756	0.037	0.627182	4.25598	2.83624	0.666413	-0.0109335	0.784779	0.895062	52	0.734	0.990245
uc001djl.3	PRKACB	-0.0797262	63	0.44557	0.849723	-0.351084	NA	NA	1.34651	0.347135	0.257804	-0.178234	0.0109084	0.0732073	17	0.044	0.850463
uc001djs.3	SAMD13	-0.0402236	106	0.61536	0.9134	-0.210871	0.597	0.941279	1.07382	0.247631	0.230608	-0.0926052	0.0653701	0.230941	33	0.17	0.919505
uc001djt.1	DNASE2B	-0.0625985	107	0.432058	0.841579	-0.364458	0.499	0.918039	1.25158	0.276982	0.221306	-0.0756663	0.138162	0.357548	32	0.266	0.959755
uc001djv.4	RPF1	0.113892	86	0.201035	0.717183	0.696727	0.259	0.847891	1.30678	0.341204	0.261102	-0.0344727	0.666793	0.826035	13	0.48	0.975921
uc001djw.4	GNG5	NA	NA	NA	NA	NA	NA	NA	NA	NA	NA	NA	NA	NA	NA	NA	NA
uc001dka.2	CTBS	0.0341412	109	0.665329	0.925676	0.176963	0.722	0.966562	0.982525	0.210462	0.214205	NA	NA	NA	NA	NA	NA
uc001dkj.3	SSX2IP	0.0274515	102	0.736687	0.946069	0.132717	0.771	0.972237	0.996522	0.210364	0.211099	-0.0570582	0.443976	0.674061	15	0.402	0.971468
uc001dkm.3	MCOLN2	-0.0619876	102	0.447695	0.850974	-0.349018	0.495	0.917777	0.917292	0.235826	0.257089	-0.0136151	0.8757	0.942134	11	0.884885	0.999167
uc001dkp.3	MCOLN3	0.205329	101	0.0123354	0.43045	1.90885	0.02	0.571719	7.63499	1.69212	0.221627	NA	NA	NA	NA	NA	NA
uc001dkt.3	WDR63	-0.165239	118	0.0292711	0.492878	-1.53356	0.063	0.679425	0.339193	1.29934	3.83068	-0.0409074	0.609406	0.79108	13	0.687	0.98782
uc001dkv.3	C1orf52	-0.128956	74	0.180116	0.69856	-0.744448	0.293	0.851578	1.77445	0.529925	0.298642	-0.00907858	0.867838	0.937449	28	0.879	0.999167
uc001dlb.3	DDAH1	-0.0317489	79	0.732905	0.944617	-0.134953	0.779	0.97375	0.787863	0.234117	0.297155	0.020311	0.47741	0.699813	102	0.705	0.988848
uc001dle.3	CYR61	0.0286768	90	0.741768	0.946539	0.129732	0.777	0.973374	0.93011	0.225201	0.242123	0.0604109	0.114153	0.321703	57	0.427	0.971468
uc001dlh.3	ZNHIT6	-0.123551	108	0.119221	0.642485	-0.923647	0.132	0.776485	0.767027	0.430851	0.561715	0.0795481	0.0490974	0.194221	51	0.181	0.919505
uc001dlj.3	COL24A1	0.0691129	118	0.361912	0.812967	0.441397	0.481	0.912484	3.04983	0.602983	0.19771	0.0988901	0.00415989	0.0394688	70	0.066	0.86856
uc001dll.2	ODF2L	-0.00248556	109	0.974877	0.993948	-0.01105	0.971	0.995592	1.14666	0.275594	0.240344	0.0502914	0.374388	0.615761	26	0.331	0.971468
uc001dlr.4	CLCA2	-0.0660451	111	0.398352	0.828332	-0.399733	0.516	0.923284	0.870298	0.247506	0.284393	0.0642213	0.481746	0.70291	10	0.175101	0.919505
uc001dlt.3	CLCA1	-0.0898083	117	0.23815	0.740202	-0.623149	0.205	0.819205	0.557401	0.35722	0.640867	NA	NA	NA	NA	NA	NA
uc001dly.3	SH3GLB1	-0.0955673	82	0.295079	0.775721	-0.530062	0.289	0.85091	1.68082	0.390146	0.232116	-0.00344386	0.956403	0.981176	21	0.652	0.98782
uc001dmi.3	LMO4	NA	NA	NA	NA	NA	NA	NA	NA	NA	NA	0.159364	5.80972e-10	1.46332e-07	126	0.019	0.788781
uc001dmn.3	PKN2	0.192151	92	0.0255579	0.477315	1.59247	0.024	0.589143	2.09082	0.458055	0.219078	0.129644	0.0247426	0.126406	25	0.07	0.877504
uc001dmo.4	GTF2B	NA	NA	NA	NA	NA	NA	NA	NA	0.46608	NA	NA	NA	NA	NA	NA	NA
uc001dmp.2	CCBL2	-0.0187795	107	0.813664	0.962101	-0.0895551	0.847	0.982807	0.399973	0.205126	0.51285	NA	NA	NA	NA	NA	NA
uc001dmt.3	GBP3	0.0427519	105	0.595109	0.90831	0.225403	0.757	0.971778	0.961748	0.206409	0.214618	NA	NA	NA	NA	NA	NA
uc001dmx.2	GBP1	-0.0102662	95	0.903479	0.978944	-0.044082	0.925	0.989275	0.736182	0.220319	0.299272	NA	NA	NA	NA	NA	NA
uc001dmz.1	GBP2	0.0717395	77	0.446632	0.850364	0.35005	0.542	0.927524	0.994198	0.246394	0.247832	NA	NA	NA	NA	NA	NA
uc001dna.2	GBP7	0.0735617	96	0.38234	0.821391	0.41755	0.468	0.909592	0.651305	0.238875	0.366764	NA	NA	NA	NA	NA	NA
uc001dnb.3	GBP4	-0.0194499	99	0.814492	0.962101	-0.0891133	0.867	0.984374	0.989243	0.248386	0.251087	NA	NA	NA	NA	NA	NA
uc001dnd.3	GBP5	0.0595083	100	0.470557	0.862516	0.327387	0.499	0.918039	0.937449	0.211828	0.225962	NA	NA	NA	NA	NA	NA
uc001dnf.2	GBP6	0.0198331	90	0.819729	0.963613	0.0863296	0.863	0.984178	0.991966	0.225516	0.227342	NA	NA	NA	NA	NA	NA
uc001dni.3	LRRC8B	-0.038139	98	0.647156	0.921932	-0.188991	0.645	0.953554	0.688123	0.224166	0.325765	0.0408116	0.462598	0.688353	27	0.495	0.976674
uc001dnl.4	LRRC8C	0.159518	86	0.073321	0.580777	1.13477	0.128	0.774157	1.70728	1.22943	0.720113	0.0280664	0.582348	0.775759	32	0.594	0.983957
uc001dnn.3	LRRC8D	0.129184	97	0.123007	0.644739	0.910069	0.187	0.808938	1.91141	0.411182	0.21512	-0.0165323	0.710546	0.853884	42	0.874	0.999167
uc001dnq.2	ZNF326	-0.200134	100	0.0152349	0.442237	-1.81716	0.034	0.620791	0.779744	2.04118	2.61776	0.0374995	0.378333	0.61927	46	0.59	0.983271
uc001dns.3	BARHL2	0.0554119	84	0.538795	0.886971	0.268576	0.542	0.927524	0.983191	0.227526	0.231416	0.0986545	0.00043496	0.00835705	106	0.274	0.962758
uc001dnu.2	AK022898	0.0333504	89	0.70318	0.936468	0.152934	0.74	0.970086	1.04722	0.233797	0.223254	NA	NA	NA	NA	NA	NA
uc001dnw.3	ZNF644	-0.113107	110	0.149942	0.672176	-0.824077	0.26	0.848573	0.277254	0.351571	1.26804	0.0708883	0.0995228	0.2977	45	0.449	0.971468
uc001doa.4	HFM1	-0.133654	115	0.0818235	0.596598	-1.08712	0.134	0.780531	1.26122	0.426752	0.338366	-0.00618297	0.906616	0.956785	30	0.96	0.999167
uc001dof.3	CDC7	-0.0218404	114	0.777096	0.955417	-0.109525	0.77	0.972237	0.653003	0.213172	0.326449	-0.0699506	0.135269	0.353182	38	0.633	0.985384
uc001doh.3	TGFBR3	0.12646	116	0.0981675	0.618557	1.00803	0.096	0.737893	1.99285	0.478955	0.240337	-0.103246	0.000458771	0.00870046	96	0.259	0.959755
uc001don.2	EPHX4	-0.107288	88	0.22295	0.728768	-0.651792	0.236	0.833655	0.683293	0.334866	0.490077	-0.127043	0.164025	0.390678	10	0.319277	0.971468
uc001doo.3	BTBD8	-0.0241	100	0.770114	0.952926	-0.113445	0.792	0.975675	0.935135	0.245399	0.26242	-0.10856	0.0777621	0.257503	22	0.278	0.962758
uc001doq.3	C1orf146	0.0283632	95	0.737599	0.946069	0.13218	0.735	0.9692	1.02148	0.252975	0.247654	-0.0982278	0.128088	0.342044	20	0.386	0.971468
uc001dor.3	GLMN	0.0385869	102	0.636472	0.920069	0.19622	0.678	0.956975	0.892097	0.219813	0.246401	-0.0483469	0.375525	0.616693	28	0.676	0.98782
uc001dot.2	RPAP2	0.00396313	116	0.958665	0.989862	0.018333	0.959	0.993232	0.895964	0.19736	0.220276	-0.0800536	0.0916554	0.284241	37	0.455	0.971468
uc001dov.4	GFI1	-0.0163068	80	0.85997	0.972862	-0.0655168	0.845	0.982807	1.04532	0.242861	0.232331	-0.163424	0.000123384	0.00350587	46	0.016	0.788781
uc001dox.3	EVI5	-0.0224599	102	0.783237	0.956396	-0.106107	0.804	0.97597	0.891989	0.221973	0.248851	-0.157392	2.82019e-05	0.00116962	59	0.016	0.788781
uc001doz.3	RPL5	-0.0520579	41	0.690328	0.933273	-0.160944	NA	NA	1.11874	0.361339	0.322988	-0.151691	0.0965797	0.29314	10	0.191102	0.924073
uc001dpg.3	FAM69A	-0.0747039	64	0.471158	0.862516	-0.326834	0.521	0.926229	1.07741	0.363754	0.33762	-0.143892	0.0146129	0.0886565	24	0.126	0.89294
uc001dpn.3	TMED5	-0.0544685	83	0.548187	0.891089	-0.261071	0.594	0.940921	1.25434	0.286878	0.228708	NA	NA	NA	NA	NA	NA
uc001dpu.3	DR1	0.107211	30	0.486674	0.869402	0.312762	NA	NA	0.698967	0.344365	0.492676	NA	NA	NA	NA	NA	NA
uc001dpz.4	BCAR3	0.122992	113	0.112478	0.632861	0.948934	0.143	0.785053	3.11039	0.711597	0.228781	0.0415284	0.362938	0.605146	40	0.313	0.971468
uc001dqf.3	DNTTIP2	-0.14332	115	0.0620334	0.554875	-1.20737	0.082	0.713635	2.40629	1.04277	0.433354	NA	NA	NA	NA	NA	NA
uc001dqg.1	GCLM	-0.00932302	60	0.930684	0.982978	-0.0311976	0.943	0.989869	0.609459	0.274658	0.450659	NA	NA	NA	NA	NA	NA
uc001dqh.3	ABCA4	0.0568805	117	0.454991	0.85504	0.341997	0.47	0.909592	0.744801	0.220272	0.295746	-0.0406285	0.499711	0.715749	23	0.977	0.999932
uc001dqj.4	ARHGAP29	-0.0686969	120	0.360708	0.812385	-0.442845	0.589	0.939686	0.564762	0.33536	0.593808	-0.0188074	0.676577	0.832724	41	0.866	0.999167
uc001dqn.4	ABCD3	0.175518	92	0.0413923	0.51778	1.38308	0.075	0.700831	5.60713	1.48175	0.264261	-0.104336	0.253071	0.495687	10	0.307924	0.971468
uc001dqr.3	F3	-0.0475661	112	0.541169	0.887537	-0.266667	0.583	0.939686	1.13277	0.272928	0.240938	NA	NA	NA	NA	NA	NA
uc001dqv.5	SLC44A3	-0.0240614	114	0.755119	0.950085	-0.121984	0.806	0.976381	1.05903	0.253587	0.239452	-0.0864143	0.231167	0.470506	16	0.412	0.971468
uc001dqz.4	CNN3	0.0326783	49	0.783702	0.956396	0.105849	NA	NA	0.0499128	0.306705	6.14482	-0.0288156	0.617723	0.796233	25	0.993	1
uc001dra.2	ALG14	-0.121679	90	0.162066	0.682772	-0.790308	0.202	0.817764	0.738813	0.563259	0.762384	-0.019444	0.752066	0.876658	22	0.973	0.999601
uc001drb.3	TMEM56	-0.0578298	93	0.499216	0.874008	-0.301711	0.51	0.920643	1.35783	0.399384	0.294134	0.07642	0.107361	0.311325	37	0.203	0.925868
uc001drq.3	PTBP2	NA	NA	NA	NA	NA	NA	NA	NA	0.36351	NA	-0.0352667	0.423103	0.656378	43	0.56	0.98175
uc001drv.3	DPYD	0.0773243	108	0.329507	0.793367	0.482135	0.23	0.833035	0.991632	0.218618	0.220463	-0.0400434	0.0148036	0.089544	309	0.553	0.980846
uc001dsb.3	LPPR5	-0.196577	66	0.0540412	0.539072	-1.26728	0.062	0.679425	1.80948	0.694694	0.38392	-0.050875	0.283748	0.526708	37	0.659	0.98782
uc001dse.3	LPPR4	0.0445061	85	0.619424	0.915417	0.208012	0.634	0.951554	1.00348	0.229686	0.228889	NA	NA	NA	NA	NA	NA
uc001dsg.3	PALMD	-0.0345269	113	0.65592	0.923902	-0.183149	0.673	0.955853	1.05173	0.218293	0.207556	-0.0870946	0.0664934	0.233829	37	0.453	0.971468
uc001dsh.1	FRRS1	-0.0923221	113	0.233508	0.738452	-0.631698	0.261	0.848573	1.68709	0.373846	0.221592	-0.0733337	0.178895	0.409048	28	0.625	0.985384
uc001dsi.1	AGL	0.044051	114	0.567993	0.898031	0.245657	0.634	0.951554	0.956869	0.20166	0.21075	NA	NA	NA	NA	NA	NA
uc001dso.2	BC112312	-0.122714	51	0.292584	0.773282	-0.533749	NA	NA	0.965094	0.411587	0.426474	NA	NA	NA	NA	NA	NA
uc001dsr.2	SLC35A3	-0.0831299	92	0.334045	0.795148	-0.476195	0.339	0.870291	1.23643	0.415538	0.336078	NA	NA	NA	NA	NA	NA
uc001dst.3	HIAT1	-0.15377	30	0.318428	0.787802	-0.496989	NA	NA	0.971494	0.458496	0.471949	NA	NA	NA	NA	NA	NA
uc001dsu.3	SASS6	-0.0137564	109	0.861635	0.973072	-0.0646766	0.859	0.984084	1.06397	0.223452	0.210018	NA	NA	NA	NA	NA	NA
uc001dsv.3	TRMT13	-0.127568	100	0.121902	0.643899	-0.913988	0.114	0.756657	1.16003	0.646921	0.557678	NA	NA	NA	NA	NA	NA
uc001dsx.2	LRRC39	0.0932176	99	0.260785	0.753697	0.583718	0.209	0.825168	0.183672	0.267736	1.45769	NA	NA	NA	NA	NA	NA
uc001dta.3	DBT	0.128018	99	0.122502	0.644278	0.911856	0.131	0.776485	1.29105	0.457536	0.354392	NA	NA	NA	NA	NA	NA
uc001dtd.3	RTCA	0.00476484	97	0.954636	0.988561	0.020162	0.96	0.993507	0.978341	0.246883	0.252349	-0.101527	0.22311	0.461272	12	0.278	0.962758
uc001dtf.2	CDC14A	-0.0858566	105	0.285846	0.766118	-0.543867	0.31	0.858705	1.39372	0.319819	0.229471	-0.0731063	0.104918	0.306902	41	0.532	0.980846
uc001dth.3	GPR88	-0.0325645	46	0.791254	0.958378	-0.101684	NA	NA	1.08418	0.338479	0.312197	-0.0378568	0.487749	0.706616	28	0.966	0.999167
uc001dti.3	VCAM1	-0.0490882	112	0.528302	0.88265	-0.277118	0.556	0.933305	0.385016	0.200656	0.521161	0.125646	0.148869	0.371481	11	0.304435	0.970953
uc001dtk.2	EXTL2	0.0708223	97	0.397821	0.828062	0.400313	0.478	0.912484	0.707961	0.22811	0.322208	-0.156172	0.0727742	0.247441	11	0.0997984	0.89294
uc001dto.2	SLC30A7	-0.018307	78	0.845003	0.969596	-0.0731415	0.851	0.98295	0.626362	0.23711	0.37855	-0.0590707	0.360145	0.602235	20	0.432	0.971468
uc001dtt.2	DPH5	-0.141638	94	0.0961013	0.615997	-1.01727	0.087	0.723752	1.70659	0.601257	0.352315	-0.0816429	0.165909	0.39282	24	0.346	0.971468
uc001dud.2	S1PR1	-0.0753887	88	0.391797	0.825447	-0.406939	0.453	0.90782	0.648961	0.323695	0.498789	-0.0178621	0.730475	0.864874	31	0.824	0.997631
uc001dug.2	OLFM3	0.0510517	50	0.66475	0.925289	0.177342	NA	NA	1.03111	0.296077	0.287145	-0.0506634	0.228939	0.467813	47	0.517	0.980127
uc001dul.3	COL11A1	0.10506	108	0.185213	0.701394	0.732328	0.138	0.784457	0.826232	0.346507	0.419382	-0.141763	0.00281774	0.0303826	37	0.119	0.89294
uc001duq.3	AMY2B	0.187789	101	0.0221009	0.47177	1.65559	0.035	0.622155	3.14973	1.31669	0.418032	NA	NA	NA	NA	NA	NA
uc001dut.3	AMY2A	0.0944034	97	0.259723	0.753181	0.585489	0.255	0.846079	1.29002	0.441301	0.342089	0.0952854	0.296587	0.541222	10	0.285235	0.96537
uc001duv.3	AMY1A	0.131223	81	0.153094	0.674935	0.815043	0.143	0.785053	0.638467	0.567745	0.889231	0.186833	0.00603659	0.0493207	18	0.068	0.871064
uc001dvh.4	NTNG1	-0.0208822	75	0.826996	0.964812	-0.0824964	0.832	0.980259	0.728038	0.25772	0.353992	-0.0334509	0.0843641	0.269885	222	0.599	0.984961
uc001dvk.1	VAV3	0.147671	99	0.0748394	0.584502	1.12587	0.105	0.746586	2.23122	0.502715	0.225309	-0.0285607	0.282588	0.525593	118	0.786	0.995686
uc001dvn.5	SLC25A24	-0.150828	96	0.0732647	0.580777	-1.1351	0.097	0.738204	3.58846	0.845602	0.235645	-0.107767	0.162476	0.388824	14	0.212	0.93353
uc001dvt.4	HENMT1	0.0158792	106	0.842772	0.968896	0.0742898	0.851	0.98295	0.983346	0.247504	0.251696	NA	NA	NA	NA	NA	NA
uc001dvv.4	PRPF38B	-0.179854	89	0.0398935	0.511764	-1.3991	0.054	0.663312	2.92311	0.97236	0.332645	NA	NA	NA	NA	NA	NA
uc001dvx.3	FNDC7	0.101058	114	0.190208	0.70482	0.720771	0.249	0.839683	0.661958	0.367237	0.554774	NA	NA	NA	NA	NA	NA
uc001dvy.3	STXBP3	-0.0303156	98	0.715988	0.940429	-0.145094	0.707	0.965794	0.80867	0.218125	0.269733	-0.0922213	0.312392	0.557504	10	0.135789	0.89671
uc001dwa.4	AKNAD1	-0.1486	117	0.0509559	0.533702	-1.29281	0.071	0.694068	2.35511	1.30788	0.555336	NA	NA	NA	NA	NA	NA
uc001dwf.2	CLCC1	-0.0570445	113	0.461651	0.858248	-0.335686	0.458	0.909126	0.834653	0.25322	0.303384	-0.0104915	0.908504	0.957566	10	0.881048	0.999167
uc001dwl.3	WDR47	-0.0534746	99	0.518865	0.88109	-0.284945	0.55	0.931117	1.23888	0.265005	0.213907	-0.0710084	0.375147	0.616198	13	0.305	0.970953
uc001dwm.1	TAF13	-0.145095	20	0.449692	0.852038	-0.347085	NA	NA	1.30593	0.51906	0.397465	-0.0665083	0.466278	0.69096	10	0.348089	0.971468
uc001dwn.3	TMEM167B	-0.108556	22	0.551256	0.891679	-0.258647	NA	NA	1.04018	0.420064	0.40384	-0.0665083	0.466278	0.69096	10	0.357576	0.971468
uc001dwu.2	SARS	0.0876757	94	0.302975	0.779445	0.518593	0.314	0.859317	1.89027	0.414988	0.219539	0.0117552	0.855501	0.93226	20	0.677	0.98782
uc001dxa.4	CELSR2	0.177046	113	0.0223308	0.47177	1.6511	0.027	0.601664	1.82798	0.434404	0.237641	0.00899859	0.886414	0.947171	21	0.78	0.994873
uc001dxd.3	PSRC1	-0.145782	111	0.0622894	0.554875	-1.20559	0.059	0.667473	0.806257	0.856736	1.06261	0.00899859	0.886414	0.947171	21	0.78	0.994873
uc001dxk.1	MYBPHL	0.186819	97	0.0257233	0.477587	1.58967	0.061	0.677218	0.00205506	1.50499	732.334	0.0145369	0.793589	0.899054	27	0.799	0.996958
uc001dxm.2	SORT1	0.10337	99	0.212393	0.724458	0.67286	0.202	0.817764	1.43537	0.327983	0.228501	0.00849332	0.845278	0.926839	44	0.925	0.999167
uc001dxn.3	PSMA5	NA	NA	NA	NA	NA	NA	NA	NA	0.584121	NA	0.0171855	0.732375	0.865471	33	0.971	0.999401
uc001dxp.3	SYPL2	0.0393082	79	0.672647	0.928204	0.172213	0.617	0.946618	0.947869	0.234247	0.24713	0.00630996	0.888698	0.948541	41	0.964	0.999167
uc001dxr.3	ATXN7L2	-0.0104092	103	0.898043	0.978669	-0.046703	0.904	0.988138	0.172623	0.208159	1.20586	-0.011682	0.798011	0.901278	40	0.863	0.999167
uc001dxx.4	AMIGO1	-0.0856327	93	0.317025	0.787049	-0.498907	0.34	0.871701	1.70795	0.390918	0.228882	-0.0148684	0.760599	0.881505	35	0.86	0.999167
uc001dxy.2	GPR61	0.0958301	84	0.2878	0.768014	0.540909	0.343	0.874031	2.05869	0.499994	0.24287	-0.00180138	0.969723	0.985142	37	0.973	0.999601
uc001dxz.3	GNAI3	-0.0147731	51	0.899176	0.978669	-0.0461553	NA	NA	0.628724	0.909255	1.44619	-0.00180138	0.969723	0.985142	37	0.973	0.999601
uc001dya.3	GNAT2	0.188239	72	0.0536993	0.539072	1.27003	0.063	0.679425	42.4081	10.6298	0.250654	-0.00920956	0.886552	0.947171	20	0.994	1
uc001dyf.3	GSTM4	0.239686	92	0.00534903	0.355111	2.27173	0.007	0.481133	0.768497	65.2585	84.9171	NA	NA	NA	NA	NA	NA
uc001dyk.3	GSTM1	0.103798	94	0.222659	0.728768	0.652359	0.304	0.855882	0.442202	0.253313	0.572844	NA	NA	NA	NA	NA	NA
uc001dyn.3	GSTM5	0.0229627	94	0.787329	0.957449	0.103844	0.817	0.976875	0.917112	0.234059	0.255213	NA	NA	NA	NA	NA	NA
uc001dyo.2	GSTM3	0.130765	89	0.135173	0.656948	0.86911	0.22	0.829829	0.323328	0.803896	2.48631	NA	NA	NA	NA	NA	NA
uc001dyq.2	EPS8L3	-0.0211801	115	0.782725	0.956396	-0.106391	0.829	0.979619	0.112994	0.212688	1.88229	NA	NA	NA	NA	NA	NA
uc001dyw.4	CSF1	-0.00951322	112	0.902733	0.978805	-0.0444406	0.906	0.988138	0.980374	0.205642	0.209759	-0.116652	0.0357597	0.161379	27	0.311	0.971468
uc001dyx.3	AHCYL1	NA	NA	NA	NA	NA	NA	NA	NA	0.520032	NA	-0.0519358	0.227513	0.46613	45	0.8	0.996958
uc001dza.2	STRIP1	0.191511	85	0.032584	0.505233	1.487	0.058	0.665408	1.235	0.879348	0.712021	-0.0579199	0.164539	0.391552	48	0.72	0.990078
uc001dzb.3	ALX3	0.0503304	92	0.558645	0.895377	0.252864	0.641	0.953403	1.34245	0.315	0.234646	-0.0360542	0.377199	0.618434	50	0.804	0.996958
uc001dzc.3	UBL4B	0.0203048	99	0.806496	0.960653	0.0933978	0.783	0.974497	0.818579	0.214042	0.26148	0.00065875	0.989076	0.994195	36	0.897	0.999167
uc001dzh.3	KCNC4	0.0219916	86	0.804994	0.9602	0.0942074	0.816	0.976661	0.755254	0.230385	0.305044	0.0718179	0.12029	0.330957	39	0.4	0.971468
uc001dzl.1	RBM15	-0.0608604	96	0.46983	0.861984	-0.328059	0.559	0.934588	1.23117	0.312522	0.253841	-0.0292952	0.584744	0.777779	29	0.497	0.976674
uc001dzo.2	SLC16A4	0.0235265	103	0.772119	0.953868	0.112316	0.811	0.976661	1.00887	0.209927	0.208081	-0.0570915	0.322755	0.566043	25	0.27	0.962758
uc001dzr.3	LAMTOR5	0.00238217	89	0.978287	0.994893	0.00953371	0.986	0.999081	0.993139	0.222979	0.22452	-0.0761788	0.1961	0.429851	24	0.16	0.907511
uc001dzs.3	PROK1	0.10623	85	0.235831	0.739894	0.6274	0.24	0.835758	1.10708	0.316654	0.286027	-0.0384434	0.594261	0.78336	16	0.924	0.999167
uc001dzt.1	KCNA10	0.141042	106	0.0781071	0.592958	1.10731	0.184	0.808857	0.283593	0.491944	1.73468	0.0741897	0.238923	0.479701	21	0.393	0.971468
uc001dzv.1	KCNA3	-0.00473894	82	0.958592	0.989862	-0.0183661	0.956	0.992517	1.00193	0.240955	0.240492	0.0114248	0.771202	0.887434	54	0.8	0.996958
uc001dzw.3	CD53	0.067211	96	0.424769	0.838803	0.371847	0.446	0.905436	1.59878	0.345315	0.215986	NA	NA	NA	NA	NA	NA
uc001eaa.3	LRIF1	-0.268207	111	0.00060409	0.252855	-3.2189	0.011	0.518643	1.18062	8.26811	7.00318	NA	NA	NA	NA	NA	NA
uc001ead.4	DRAM2	-0.110485	89	0.206839	0.722762	-0.684368	0.213	0.827442	0.873408	0.439457	0.503152	NA	NA	NA	NA	NA	NA
uc001eah.1	CEPT1	0.0417014	71	0.671322	0.928204	0.173069	0.675	0.955853	0.744	0.244572	0.328725	0.0385407	0.617404	0.796141	14	0.524	0.980846
uc001eal.2	DENND2D	-0.0129736	98	0.87627	0.97634	-0.0573622	0.896	0.988138	0.940472	0.212698	0.226161	0.0385407	0.617404	0.796141	14	0.524	0.980846
uc001eam.3	CHI3L2	0.236907	62	0.0245705	0.475734	1.60959	NA	NA	0.612728	0.741175	1.20963	0.0385407	0.617404	0.796141	14	0.524	0.980846
uc001eas.4	CHIA	0.156014	97	0.0625198	0.555682	1.20398	0.127	0.774157	0.433226	0.682176	1.57464	0.0937992	0.28119	0.524693	11	0.306061	0.971468
uc001eaw.2	PIFO	-0.059705	106	0.455799	0.85504	-0.341227	0.4	0.888028	0.974948	0.217831	0.223428	NA	NA	NA	NA	NA	NA
uc001eba.3	OVGP1	-0.134171	101	0.102012	0.620838	-0.991347	0.153	0.790032	0.509126	0.669288	1.31458	NA	NA	NA	NA	NA	NA
uc001ebb.3	WDR77	0.00492177	94	0.953889	0.988561	0.0205024	0.965	0.99462	1.03288	0.223867	0.216741	NA	NA	NA	NA	NA	NA
uc001ebc.3	ATP5F1	0.0801571	107	0.31439	0.786914	0.502531	0.287	0.85091	1.55849	0.417801	0.26808	NA	NA	NA	NA	NA	NA
uc001ebe.3	C1orf162	0.0616952	105	0.443123	0.848008	0.353475	0.385	0.8845	1.08493	0.244122	0.225012	NA	NA	NA	NA	NA	NA
uc001ebf.3	ADORA3	-0.0689251	98	0.40813	0.8316	-0.389201	0.416	0.897147	0.99186	0.276343	0.278611	0.0337559	0.661738	0.823563	14	0.981	0.999932
uc001ebl.3	RAP1A	NA	NA	NA	NA	NA	NA	NA	NA	0.598245	NA	-0.112612	0.00581203	0.0482689	50	0.202	0.925868
uc001ebo.2	FAM212B	0.0175631	105	0.827175	0.964812	0.0824026	0.822	0.978165	0.916544	0.208936	0.22796	-0.0865047	0.0468579	0.188695	44	0.557	0.98175
uc001ebs.3	DDX20	0.00900159	110	0.908777	0.979717	0.0415426	0.902	0.988138	0.890279	0.205498	0.230825	-0.0521309	0.241899	0.483617	42	0.78	0.994873
uc001ebu.1	KCND3	0.0196768	58	0.856842	0.971547	0.067099	NA	NA	0.708645	0.268144	0.37839	0.0400539	0.130204	0.345155	119	0.609	0.984961
uc001ebw.4	LOC643355	0.02159	92	0.801904	0.959409	0.0958776	0.763	0.972237	0.562636	0.219011	0.389259	0.0993167	0.00351205	0.0353177	72	0.228	0.946341
uc001ebx.3	CTTNBP2NL	-0.12767	108	0.107399	0.630146	-0.969	0.126	0.774157	1.87677	0.441614	0.235306	-0.0786405	0.0280867	0.138501	65	0.151	0.90469
uc001ecb.3	WNT2B	-0.154857	72	0.112485	0.632861	-0.948904	0.187	0.808938	2.19096	0.534271	0.243853	-0.124816	0.00148797	0.0198396	54	0.009	0.782772
uc001ecd.3	ST7L	-0.0807904	105	0.315234	0.786928	-0.501367	0.415	0.89624	1.57435	0.331702	0.210692	-0.101954	0.0125194	0.0799574	50	0.047	0.851229
uc001ecj.1	CAPZA1	-0.0695749	57	0.527293	0.882627	-0.277948	0.511	0.921158	0.826406	0.340429	0.411939	-0.116503	0.0297635	0.143692	29	0.033	0.832569
uc001eck.3	MOV10	-0.0895643	101	0.275034	0.759322	-0.560614	0.508	0.920148	1.57504	0.477786	0.303349	-0.0137234	0.853924	0.931165	15	0.873	0.999167
uc001ecp.1	RHOC	NA	NA	NA	NA	NA	NA	NA	NA	0.456753	NA	0.0274286	0.731918	0.865311	13	0.851	0.999167
uc001ect.1	PPM1J	0.10723	104	0.18468	0.700609	0.733581	0.216	0.827866	1.02124	0.426818	0.417941	0.0274286	0.731918	0.865311	13	0.851	0.999167
uc001ecu.3	FAM19A3	-0.0188807	97	0.821661	0.964011	-0.0853073	0.85	0.98295	0.952768	0.218463	0.229293	0.0628002	0.470598	0.69482	11	0.56513	0.981893
uc001ecy.3	SLC16A1	-0.016685	105	0.83569	0.96688	-0.0779549	0.83	0.979619	0.975176	0.236733	0.242759	0.130991	0.0613629	0.222435	17	0.224	0.943181
uc001edf.1	LRIG2	-0.0235017	113	0.761678	0.951627	-0.118229	0.804	0.97597	0.521373	0.207185	0.397384	0.0188534	0.749014	0.874745	24	0.903	0.999167
uc001edk.3	MAGI3	-0.0863174	113	0.265329	0.755468	-0.576215	0.355	0.876072	1.47009	0.308208	0.209653	-0.00784121	0.852285	0.930461	47	0.986	0.999932
uc001edq.3	RSBN1	-0.120721	101	0.14122	0.661865	-0.850103	0.223	0.830411	0.729787	0.445928	0.611039	-0.152952	0.0938415	0.287754	10	0.180905	0.919505
uc001eds.3	PTPN22	-0.147698	118	0.0513656	0.533702	-1.28933	0.07	0.688207	4.36839	1.03254	0.236365	-0.11774	0.0835651	0.268347	18	0.159	0.907511
uc001edv.2	AP4B1-AS1	-0.0898852	96	0.285771	0.766118	-0.543982	0.258	0.847307	0.702074	0.363768	0.518133	-0.0859967	0.162345	0.388816	22	0.214	0.936058
uc001edw.3	BCL2L15	-0.0132822	103	0.870125	0.974613	-0.0604183	0.862	0.984178	0.776918	0.213078	0.27426	-0.0855256	0.185201	0.416022	20	0.229	0.947575
uc001eeb.3	AP4B1	0.204634	104	0.0113603	0.425255	1.94461	0.025	0.59117	6.93568	3.37075	0.486002	-0.0859967	0.162345	0.388816	22	0.214	0.936058
uc001eeg.3	DCLRE1B	-0.152226	111	0.0515795	0.533702	-1.28752	0.031	0.6186	2.23208	1.12797	0.505345	-0.0149631	0.835753	0.920934	16	0.796	0.996958
uc001eem.3	HIPK1	0.0654957	91	0.449143	0.851691	0.347615	0.44	0.904026	1.23734	0.272469	0.220206	0.0203654	0.752391	0.876702	20	0.772	0.994873
uc001eer.1	OLFML3	-0.115224	91	0.183029	0.7003	-0.737479	0.325	0.862114	1.36853	0.375702	0.27453	0.0305566	0.644526	0.812326	19	0.734	0.990245
uc001eew.3	TRIM33	-0.089916	92	0.29609	0.775943	-0.528576	0.246	0.839606	0.914948	0.301637	0.329677	NA	NA	NA	NA	NA	NA
uc001efa.3	BCAS2	0.29554	34	0.040424	0.512529	1.39336	NA	NA	1.26122	6.39278	5.06872	NA	NA	NA	NA	NA	NA
uc001efd.1	DENND2C	0.103123	112	0.185254	0.701394	0.732232	0.293	0.851578	0.779765	0.275861	0.353775	-0.22765	0.000301859	0.00651697	21	0.009	0.782772
uc001efe.2	AMPD1	0.00952778	109	0.903916	0.978944	0.0438721	0.933	0.989861	0.611592	0.219593	0.359051	-0.249545	0.00016461	0.00424695	19	0.006	0.71668
uc001efi.3	CSDE1	0.113818	82	0.212396	0.724458	0.672854	0.208	0.823322	1.08861	0.291058	0.267367	-0.190096	0.000622607	0.0108639	27	0.025	0.805308
uc001efp.4	SIKE1	-0.139493	74	0.147082	0.670035	-0.832442	0.192	0.810614	1.16085	0.48845	0.420769	-0.165241	0.00725853	0.0556119	22	0.126	0.89294
uc001efr.3	SYCP1	-0.0751182	107	0.345779	0.804072	-0.461202	0.385	0.8845	1.4576	0.448379	0.307614	-0.0978753	0.103957	0.3053	23	0.442	0.971468
uc001efs.2	TSHB	0.0247279	84	0.783866	0.956396	0.105758	0.814	0.976661	0.99976	0.22753	0.227584	0.014706	0.87202	0.939433	10	0.988787	0.999932
uc001eft.3	TSPAN2	0.0864531	81	0.346575	0.804357	0.460203	0.356	0.876072	1.49112	0.444489	0.298091	0.0534973	0.395763	0.634948	21	0.551	0.980846
uc001efu.1	NGF	-0.0241897	79	0.794855	0.958602	-0.0997119	0.813	0.976661	0.999487	0.233858	0.233978	0.0459669	0.195845	0.429701	66	0.118	0.89294
uc001efv.1	VANGL1	0.135515	87	0.125921	0.644739	0.899903	0.186	0.808938	0.0589506	17.6837	299.976	0.128831	0.0287974	0.14087	24	0.534	0.980846
uc001efx.4	CASQ2	0.0540108	100	0.512524	0.877828	0.290286	0.488	0.913228	0.690978	0.261483	0.378425	0.0895084	0.100872	0.299846	28	0.586	0.983271
uc001efy.3	NHLH2	-0.0356348	36	0.798966	0.959409	-0.0974718	NA	NA	1.03761	0.397791	0.383371	0.0506115	0.353574	0.595987	28	0.365	0.971468
uc001egb.4	SLC22A15	0.0295421	96	0.725715	0.942904	0.139234	0.734	0.9692	1.0274	0.243276	0.236787	0.0327478	0.594678	0.78338	22	0.476	0.973313
uc001egc.1	MAB21L3	-0.099318	112	0.202003	0.717527	-0.694642	0.225	0.83165	0.841197	0.278778	0.331407	-0.0448848	0.622946	0.79862	10	0.83822	0.99815
uc001ege.3	ATP1A1	-0.0419998	86	0.637276	0.920415	-0.195673	0.719	0.966562	0.952735	0.229856	0.241259	-0.0444522	0.432367	0.665186	26	0.82	0.997631
uc001egm.3	CD58	-0.172148	78	0.0660111	0.564708	-1.18038	NA	NA	0.297003	0.935254	3.14897	0.106615	0.0467256	0.18821	29	0.419	0.971468
uc001egu.4	CD2	-0.0942151	115	0.219935	0.727239	-0.657705	0.381	0.883251	1.25921	0.396703	0.315042	0.0526891	0.287235	0.530368	34	0.353	0.971468
uc001egv.1	PTGFRN	0.0110856	107	0.889344	0.978579	0.0509305	0.944	0.989869	0.680411	0.218112	0.320559	0.0782143	0.0445181	0.182464	55	0.181	0.919505
uc001egy.3	TTF2	-0.0533255	117	0.483662	0.867963	-0.315458	0.506	0.920148	1.00987	0.246435	0.244027	0.0515416	0.475127	0.698347	16	0.366	0.971468
uc001egz.2	TRIM45	0.0670165	107	0.400278	0.828699	0.397638	0.462	0.909127	0.192705	0.47376	2.45848	0.0209995	0.818065	0.911096	10	0.359918	0.971468
uc001ehb.3	VTCN1	0.180096	91	0.0374225	0.511258	1.42687	0.046	0.647307	1.38728	1.19755	0.863237	0.116739	0.161262	0.387645	12	0.0850851	0.89294
uc001ehd.1	MAN1A2	-0.100076	90	0.250172	0.747372	-0.601762	0.434	0.902626	0.303276	0.368313	1.21445	0.125619	0.0295785	0.143049	25	0.129	0.89294
uc001ehe.3	FAM46C	0.025663	73	0.791095	0.958378	0.101771	0.867	0.984374	1.16076	0.281348	0.242383	-0.0527522	0.544471	0.747477	11	0.829	0.997631
uc001ehf.3	GDAP2	0.211741	85	0.0181311	0.458499	1.74157	0.019	0.568346	3.43256	1.06701	0.310849	NA	NA	NA	NA	NA	NA
uc001ehk.2	SPAG17	-0.128806	119	0.0879162	0.607668	-1.05593	0.132	0.776485	2.20009	0.987765	0.448965	-0.0596105	0.103994	0.305301	62	0.439	0.971468
uc001ehl.1	TBX15	0.0807235	57	0.463291	0.858397	0.334146	0.526	0.926321	2.91486	0.833529	0.285958	0.0324137	0.289539	0.532623	89	0.742	0.990296
uc001ehn.3	WARS2	0.0406552	104	0.615018	0.9134	0.211112	0.61	0.945635	0.863287	0.227128	0.263096	0.073725	0.0215497	0.114572	81	0.394	0.971468
uc001ehr.1	HAO2	-0.165892	104	0.0401541	0.511764	-1.39627	0.06	0.669481	1.42648	0.836552	0.586445	-0.0134307	0.812484	0.908251	26	0.942	0.999167
uc001eht.3	HSD3B2	-0.137258	106	0.0864361	0.604181	-1.0633	0.068	0.687333	0.46042	0.565493	1.22821	0.0069227	0.921239	0.964623	17	0.792	0.996319
uc001ehv.1	HSD3B1	-0.0929499	102	0.254908	0.750272	-0.593617	0.29	0.85091	0.586536	0.3508	0.598088	NA	NA	NA	NA	NA	NA
uc001ehy.1	ZNF697	-0.0188807	97	0.821661	0.964011	-0.0853073	0.828	0.979501	0.862535	0.215339	0.249658	NA	NA	NA	NA	NA	NA
uc001ehz.3	PHGDH	0.109544	101	0.181864	0.699122	0.740253	0.249	0.839683	7.75182	167.279	21.5793	NA	NA	NA	NA	NA	NA
uc001eid.3	HMGCS2	0.161333	104	0.0459589	0.528257	1.33763	0.11	0.753054	0.0011001	15.3834	13983.6	NA	NA	NA	NA	NA	NA
uc001eif.3	REG4	0.13668	94	0.108315	0.63071	0.965312	0.165	0.794435	0.260489	0.49085	1.88434	NA	NA	NA	NA	NA	NA
uc001eij.3	ADAM30	-0.0928608	100	0.26017	0.753181	-0.584744	0.321	0.859762	1.46852	0.498038	0.339142	-0.142359	0.0875853	0.275929	12	0.507014	0.977493
uc001eik.3	NOTCH2	-0.0968658	109	0.219716	0.727037	-0.658138	0.29	0.85091	2.43634	0.508871	0.208867	-0.126595	0.000107695	0.00315073	78	0.275	0.962758
uc001eip.3	FCGR1B	0.062643	76	0.509189	0.877828	0.293121	NA	NA	0.595585	0.293601	0.492963	-0.00949566	0.871983	0.939433	24	0.882	0.999167
uc001ejc.4	BC071797	0.0411036	71	0.675764	0.92872	0.170205	0.687	0.959665	0.830033	0.246423	0.296883	NA	NA	NA	NA	NA	NA
uc001emn.4	NOTCH2NL	0.0426874	89	0.625756	0.917683	0.203595	0.644	0.953554	0.861383	0.224013	0.260062	-0.121771	0.00145043	0.0194487	57	0.338	0.971468
uc001eni.2	HFE2	-0.0372059	84	0.679832	0.929357	-0.167599	0.727	0.967559	1.10437	0.257648	0.233299	-0.0270801	0.674844	0.83147	20	0.724	0.990245
uc001enn.4	TXNIP	0.118072	75	0.216548	0.724458	0.664446	0.249	0.839683	1.08111	0.412998	0.382015	-0.0326526	0.587512	0.779995	23	0.695	0.988538
uc001enp.1	POLR3GL	0.0481673	57	0.661649	0.924718	0.179373	NA	NA	0.95924	0.270087	0.281564	-0.0536843	0.333907	0.577097	27	0.513	0.978293
uc001enq.1	ANKRD34A	0.0462853	84	0.60767	0.911316	0.216332	0.631	0.950186	1.03946	0.24015	0.231034	-0.0536843	0.333907	0.577097	27	0.513	0.978293
uc001enr.3	LIX1L	-0.0581565	57	0.597223	0.908872	-0.223864	NA	NA	0.970893	0.34299	0.353273	-0.0640246	0.240581	0.481701	28	0.401	0.971468
uc001ent.2	RBM8A	0.440386	12	0.0856734	0.604181	1.06715	NA	NA	2.01168	1.85673	0.922979	-0.0640246	0.240581	0.481701	28	0.401	0.971468
uc001eny.2	PEX11B	0.077854	82	0.393673	0.826239	0.404865	0.444	0.905436	1.31158	0.303408	0.231329	-0.0496344	0.371654	0.613569	27	0.546	0.980846
uc001eoa.3	ITGA10	-0.0547691	111	0.483694	0.867963	-0.315429	0.5	0.918549	1.05467	0.219411	0.208038	-0.0496344	0.371654	0.613569	27	0.546	0.980846
uc001eob.1	ANKRD35	0.0861812	115	0.261821	0.754057	0.581996	0.358	0.876252	0.0950057	0.276352	2.9088	-0.0913317	0.100198	0.29909	27	0.147	0.90025
uc001eoc.1	PIAS3	-0.150566	87	0.0890635	0.609858	-1.0503	0.104	0.746586	1.80017	0.69764	0.38754	-0.0665559	0.279535	0.523193	22	0.441	0.971468
uc001eoe.3	NUDT17	-0.0505587	94	0.552514	0.89209	-0.257657	0.583	0.939686	0.554349	0.270147	0.487323	-0.0423971	0.533226	0.740617	18	0.655	0.98782
uc001eoh.3	POLR3C	-0.139362	89	0.111334	0.63223	-0.953373	0.156	0.793077	1.53228	0.59724	0.389772	-0.0423971	0.533226	0.740617	18	0.655	0.98782
uc001eoj.3	RNF115	-0.0469298	81	0.609389	0.911443	-0.215106	0.617	0.946618	0.90933	0.302208	0.332341	-0.0342479	0.614736	0.794721	18	0.682	0.98782
uc001eol.1	CD160	-0.16546	82	0.0698634	0.574051	-1.15575	0.075	0.700831	0.439769	0.983534	2.23648	NA	NA	NA	NA	NA	NA
uc001eoo.2	PDZK1	-0.174957	105	0.0296394	0.495643	-1.52813	0.039	0.632217	3.70168	1.12511	0.303946	NA	NA	NA	NA	NA	NA
uc001eot.2	GPR89A	0.0716335	64	0.489578	0.870462	0.310178	0.557	0.933565	1.03065	0.264238	0.256379	NA	NA	NA	NA	NA	NA
uc001eou.4	GPR89C	0.136462	58	0.210907	0.724458	0.675909	0.248	0.839606	1.07007	0.285865	0.267145	NA	NA	NA	NA	NA	NA
uc001epd.3	LOC728989	0.0909935	78	0.331197	0.793759	0.479914	0.409	0.892128	1.41444	0.36609	0.258823	-0.100134	0.179141	0.40919	15	0.761523	0.993422
uc001epe.3	PRKAB2	-0.0119686	59	0.911853	0.980096	-0.0400753	0.932	0.989522	1.10181	0.30633	0.278024	NA	NA	NA	NA	NA	NA
uc001epi.2	FMO5	0.103505	108	0.191803	0.707175	0.717145	0.253	0.844881	1.7605	0.398725	0.226483	NA	NA	NA	NA	NA	NA
uc001epm.5	CHD1L	0.0817801	109	0.300133	0.779183	0.522687	0.376	0.881571	1.10381	0.223992	0.202927	0.101512	0.243509	0.485571	11	0.266	0.959755
uc001epq.3	BCL9	0.0742271	106	0.353834	0.808861	0.451201	0.435	0.902626	0.970942	0.221274	0.227897	-0.193885	3.97268e-07	4.60717e-05	57	0.049	0.853977
uc001epr.2	ACP6	-0.113644	114	0.140721	0.661595	-0.85164	0.187	0.808938	1.01241	0.625984	0.618314	-0.135548	0.00618536	0.050155	34	0.103	0.89294
uc001eps.1	GJA5	-0.0968258	95	0.252732	0.748594	-0.59734	0.293	0.851578	1.43693	0.359222	0.249992	-0.11987	0.0378822	0.166119	25	0.223	0.942576
uc001epu.2	GJA8	0.0880261	101	0.283362	0.764877	0.547659	0.343	0.874031	0.963577	0.222452	0.230861	-0.166615	0.00817316	0.060687	21	0.233	0.952382
uc001epv.4	GPR89B	0.0907358	64	0.381442	0.820565	0.418571	NA	NA	1.04804	0.268504	0.256198	-0.198495	0.00125953	0.0176578	22	0.072	0.879994
uc001esp.4	FCGR1A	0.0692061	95	0.413651	0.833867	0.383366	0.451	0.906396	0.477073	0.319508	0.669726	NA	NA	NA	NA	NA	NA
uc001ess.3	HIST2H4A	NA	NA	NA	NA	NA	NA	NA	NA	0.800009	NA	NA	NA	NA	NA	NA	NA
uc001esv.3	HIST2H3C	NA	NA	NA	NA	NA	NA	NA	NA	NA	NA	NA	NA	NA	NA	NA	NA
uc001esw.3	HIST2H2AA4	NA	NA	NA	NA	NA	NA	NA	1	0.586685	0.586685	NA	NA	NA	NA	NA	NA
uc001etc.3	HIST2H2BE	NA	NA	NA	NA	NA	NA	NA	1	0.485101	0.485101	NA	NA	NA	NA	NA	NA
uc001etd.3	HIST2H2AC	0	12	1	1	0	NA	NA	NA	0.492194	NA	-0.301634	0.000952556	0.014391	10	0.00610376	0.71668
uc001ete.3	HIST2H2AB	NA	NA	NA	NA	NA	NA	NA	0.826402	0.472237	0.571437	-0.301634	0.000952556	0.014391	10	0.00610376	0.71668
uc001etf.3	BOLA1	-0.0921472	84	0.30673	0.782296	-0.513244	0.48	0.912484	1.27647	0.380095	0.297771	-0.304922	0.000253211	0.00575707	12	0.003003	0.66785
uc001etg.3	SV2A	-0.0541598	76	0.568197	0.898031	-0.245501	0.64	0.953067	1.04571	0.248698	0.237827	-0.218999	0.000944015	0.0143022	19	0.047	0.851229
uc001etk.2	SF3B4	-0.0181489	24	0.916815	0.980613	-0.0377183	NA	NA	NA	0.410292	NA	-0.212259	0.000563368	0.010113	22	0.054	0.863625
uc001etl.4	MTMR11	-0.0857679	110	0.274948	0.759322	-0.560749	0.267	0.848573	1.68207	0.352161	0.209362	-0.203144	0.00073884	0.0120548	23	0.091	0.89294
uc001etn.3	OTUD7B	-0.0628695	100	0.445864	0.8501	-0.350798	0.374	0.881364	0.675337	0.264392	0.391497	-0.200875	0.000178894	0.00451295	29	0.064	0.867588
uc001etp.3	VPS45	0.0848244	78	0.365027	0.813909	0.437675	0.387	0.885066	0.659616	0.671545	1.01808	-0.155784	0.00102941	0.0151828	37	0.272	0.962758
uc001ett.3	PLEKHO1	-0.0410211	92	0.633591	0.919351	-0.198191	0.624	0.949006	1.19199	0.268763	0.225475	-0.0988353	0.0808625	0.264136	26	0.654	0.98782
uc001etw.3	ANP32E	-0.0435825	72	0.65511	0.923378	-0.183686	0.676	0.956656	1.16276	0.283333	0.243674	-0.0897331	0.0941565	0.288501	29	0.587	0.983271
uc001etx.3	CA14	-0.0234966	104	0.771309	0.953629	-0.112772	0.786	0.975315	0.624627	0.234368	0.375212	-0.0891776	0.138481	0.357994	23	0.377	0.971468
uc001ety.2	APH1A	0.0169051	39	0.899712	0.978669	0.0458965	NA	NA	0.172434	0.314164	1.82194	-0.124643	0.042853	0.178314	22	0.175	0.919505
uc001eud.3	C1orf54	-0.00971552	92	0.910112	0.979867	-0.0409053	0.911	0.988138	0.207086	0.249718	1.20586	-0.124643	0.042853	0.178314	22	0.175	0.919505
uc001euj.3	C1orf51	-0.0603409	106	0.451014	0.852496	-0.34581	0.413	0.894043	1.10457	0.272544	0.246742	NA	NA	NA	NA	NA	NA
uc001euk.3	MRPS21	-0.11571	52	0.316122	0.786928	-0.500145	NA	NA	0.851074	0.515256	0.605419	-0.0913865	0.156862	0.381908	20	0.279	0.962858
uc001eum.4	PRPF3	-0.0499148	38	0.713575	0.939612	-0.14656	NA	NA	1.1767	0.372577	0.316629	-0.10024	0.103389	0.304519	22	0.337	0.971468
uc001euq.4	TARS2	-0.0962738	112	0.216177	0.724458	-0.665191	0.199	0.815889	1.36146	0.306524	0.225144	0.0452059	0.506455	0.721585	18	0.443	0.971468
uc001eus.3	ECM1	0.035615	110	0.650302	0.922774	0.186885	0.653	0.95481	0.264689	0.243218	0.918879	0.0452059	0.506455	0.721585	18	0.443	0.971468
uc001eux.3	ADAMTSL4	-0.109552	115	0.153754	0.675856	-0.813173	0.252	0.844094	0.770526	0.413585	0.536756	0.0617801	0.363904	0.606089	18	0.446	0.971468
uc001euz.3	MCL1	0.0678918	89	0.437943	0.845061	0.358583	0.497	0.918039	0.87559	0.277219	0.316608	0.0659254	0.33261	0.576337	18	0.379	0.971468
uc001eve.3	ENSA	-0.034641	25	0.838502	0.967752	-0.0764959	NA	NA	1.00053	0.368346	0.368151	0.0243566	0.727937	0.863264	17	0.759	0.993422
uc001evj.2	GOLPH3L	0.0174111	65	0.865564	0.974055	0.0627007	0.874	0.986458	0.443887	0.254939	0.574334	0.0175882	0.807461	0.906007	16	0.963	0.999167
uc001evk.2	HORMAD1	-0.0909603	101	0.267621	0.756312	-0.57248	0.33	0.864113	1.0859	0.357467	0.329191	NA	NA	NA	NA	NA	NA
uc001evn.3	CTSS	0.0514492	102	0.528575	0.88265	0.276893	0.582	0.939686	0.476505	0.254251	0.533575	NA	NA	NA	NA	NA	NA
uc001evp.2	CTSK	0.118054	92	0.170117	0.690932	0.769252	0.165	0.794435	4.65829e-07	0.227249	487838	NA	NA	NA	NA	NA	NA
uc001evr.2	ARNT	0.0435877	100	0.597134	0.908872	0.223928	0.657	0.955204	1.05817	0.22374	0.21144	NA	NA	NA	NA	NA	NA
uc001evu.2	SETDB1	0.0134135	101	0.870146	0.974613	0.0604081	0.901	0.988138	0.378798	0.21372	0.564205	NA	NA	NA	NA	NA	NA
uc001evz.3	CERS2	-0.0253786	83	0.779645	0.955986	-0.108103	0.78	0.973977	0.936421	0.22891	0.244452	NA	NA	NA	NA	NA	NA
uc001ewa.2	ANXA9	-0.0203238	102	0.803408	0.959409	-0.0950639	0.793	0.975675	0.921633	0.213354	0.231496	NA	NA	NA	NA	NA	NA
uc001ewh.1	PRUNE	-0.0263228	100	0.749591	0.948983	-0.125176	0.741	0.970574	1.06468	0.227551	0.213726	-0.0814185	0.244888	0.487355	17	0.395	0.971468
uc001ewl.2	BNIPL	-0.00918735	102	0.910401	0.979871	-0.0407672	0.9	0.988138	0.982646	0.21308	0.216843	-0.0448773	0.394522	0.633671	30	0.67	0.98782
uc001ewn.3	C1orf56	-0.0426401	100	0.605131	0.911194	-0.218151	0.777	0.973374	0.776442	0.250603	0.322758	-0.054115	0.296635	0.541222	31	0.617	0.984961
uc001ewp.3	CDC42SE1	-0.173079	23	0.33039	0.793759	-0.480973	NA	NA	0.792126	0.461992	0.58323	-0.043032	0.391844	0.631085	33	0.65	0.986969
uc001ewq.3	MLLT11	-0.324133	71	0.00097295	0.260639	-3.01191	0.002	0.294571	9.92578	23.6994	2.38766	-0.043032	0.391844	0.631085	33	0.65	0.986969
uc001ewr.2	GABPB2	-0.0272418	99	0.742433	0.946539	-0.129343	0.753	0.971562	0.794596	0.229144	0.288378	-0.0860643	0.056279	0.210404	41	0.398	0.971468
uc001ewv.3	SEMA6C	-0.0196096	104	0.808331	0.960653	-0.0924108	0.81	0.976661	0.996717	0.209441	0.210131	-0.0942835	0.0388748	0.168367	40	0.332	0.971468
uc001ewx.2	TNFAIP8L2	-0.0102002	72	0.91674	0.980613	-0.0377538	0.916	0.988138	0.966455	0.261276	0.270345	-0.0856839	0.0638098	0.227469	39	0.385	0.971468
uc001ewy.3	LYSMD1	0.0445779	93	0.602451	0.910118	0.220078	0.582	0.939686	0.992074	0.220736	0.222499	-0.0856839	0.0638098	0.227469	39	0.385	0.971468
uc001ewz.3	SCNM1	-0.113568	93	0.184508	0.700609	-0.733984	0.195	0.81307	1.32412	0.362217	0.273552	-0.0924725	0.0483196	0.192643	38	0.364	0.971468
uc001exc.4	TMOD4	0.083261	79	0.370809	0.816492	0.43085	0.425	0.897682	0.304532	0.559396	1.8369	-0.0924725	0.0483196	0.192643	38	0.364	0.971468
uc001exe.2	VPS72	0.034208	74	0.722165	0.942495	0.141363	0.715	0.966394	1.02705	0.247576	0.241056	-0.0794613	0.0648378	0.229711	45	0.506	0.977493
uc001exj.3	PIP5K1A	-0.0555471	96	0.509474	0.877828	-0.292878	0.588	0.939686	1.08458	0.291944	0.269178	-0.0954315	0.0133745	0.0836258	56	0.379	0.971468
uc001exl.3	PSMD4	-0.0257364	61	0.808641	0.960818	-0.0922443	NA	NA	1.06665	0.282856	0.265182	-0.0934002	0.0630928	0.225962	33	0.323	0.971468
uc001exq.3	ZNF687	-0.0525467	114	0.495785	0.872609	-0.304706	0.602	0.942396	1.23813	0.316887	0.255939	-0.0829939	0.135222	0.353182	27	0.346	0.971468
uc001exu.3	PI4KB	0.125606	81	0.171459	0.691182	0.765841	0.205	0.819205	1.54536	0.38523	0.249281	-0.0721187	0.202729	0.437087	26	0.444	0.971468
uc001exw.1	RFX5	-0.128135	106	0.109477	0.63071	-0.960678	0.143	0.785053	0.505645	0.486017	0.961181	-0.0674762	0.284118	0.527041	21	0.661	0.98782
uc001eyc.1	PSMB4	0.0662162	86	0.457254	0.855731	0.339843	0.474	0.911402	0.976893	0.31968	0.327242	-0.0481738	0.504455	0.720203	16	0.738	0.990245
uc001eyd.2	POGZ	0.0711545	103	0.381089	0.820565	0.418973	0.459	0.909126	1.08038	0.286853	0.265512	0.0442484	0.417338	0.65133	28	0.46	0.971468
uc001eyl.3	TUFT1	0.0586549	111	0.453216	0.853883	0.343695	0.488	0.913228	1.06632	0.290065	0.272025	0.170114	0.00840628	0.0615445	20	0.03	0.828045
uc001eyn.1	SNX27	0.0280566	50	0.811753	0.961877	0.0905761	NA	NA	0.927522	0.28394	0.306128	0.115429	0.0898103	0.280516	18	0.286	0.96537
uc001eys.2	CELF3	0.0434665	39	0.74591	0.947328	0.127314	NA	NA	0.470064	0.311942	0.663615	NA	NA	NA	NA	NA	NA
uc001eyv.3	MRPL9	0.0365162	96	0.66454	0.925289	0.177479	0.644	0.953554	0.971864	0.218921	0.225259	0.0163044	0.7865	0.895808	23	0.841	0.999167
uc001eza.4	TDRKH	0.107063	107	0.17903	0.696985	0.747075	0.199	0.815889	1.21331	0.337762	0.278381	0.0163044	0.7865	0.895808	23	0.841	0.999167
uc001ezf.1	LINGO4	0.202777	106	0.0113121	0.425255	1.94646	0.019	0.568346	2.43546	3.49577	1.43536	0.0163044	0.7865	0.895808	23	0.841	0.999167
uc001ezh.3	RORC	-0.0597146	105	0.4579	0.856273	-0.339229	0.492	0.914847	1.21439	0.272336	0.224258	0.0247431	0.687675	0.83903	22	0.769	0.994868
uc001ezj.2	THEM4	0.0976663	100	0.23631	0.739894	0.626518	0.296	0.85356	0.963633	0.353372	0.366709	0.0664709	0.269483	0.512598	23	0.476	0.973313
uc001ezl.3	S100A10	-0.133962	31	0.37643	0.819461	-0.424316	NA	NA	1.15097	0.392064	0.340637	NA	NA	NA	NA	NA	NA
uc001ezn.3	S100A11	0.130019	79	0.162246	0.682772	0.789827	NA	NA	1.10642	0.383653	0.346752	0.0691921	0.406376	0.643238	12	0.520521	0.980752
uc001ezo.1	TCHHL1	-0.231967	99	0.00513649	0.355111	-2.28933	0.001	0.200844	0.265107	1.97876	7.464	0.0615602	0.479405	0.701248	11	0.54008	0.980846
uc001ezp.3	TCHH	0.11768	46	0.338819	0.798919	0.470032	NA	NA	NA	0.349122	NA	NA	NA	NA	NA	NA	NA
uc001ezs.1	RPTN	0.11324	103	0.163332	0.685595	0.786928	0.674	0.955853	0.529052	0.594643	1.12398	0.124068	0.154042	0.379049	11	0.189189	0.921426
uc001ezt.2	HRNR	0.159157	94	0.0615005	0.55377	1.21112	0.486	0.913132	1.27416	0.494643	0.388211	NA	NA	NA	NA	NA	NA
uc001ezu.1	FLG	0.220893	35	0.119844	0.643378	0.921383	NA	NA	NA	1.59801	NA	NA	NA	NA	NA	NA	NA
uc001ezw.4	FLG2	0.0726097	95	0.391064	0.825182	0.407753	0.762	0.972237	0.723229	0.242529	0.335341	NA	NA	NA	NA	NA	NA
uc001ezx.2	CRNN	0.0360576	112	0.643217	0.920736	0.191642	0.626	0.949313	0.990219	0.201303	0.203292	NA	NA	NA	NA	NA	NA
uc001ezy.3	LCE5A	0.180818	81	0.0489938	0.533066	1.30986	0.05	0.650755	1.82927	2.58247	1.41175	NA	NA	NA	NA	NA	NA
uc001ezz.3	CRCT1	0.110456	67	0.275311	0.759322	0.560177	0.267	0.848573	1.64216	0.633011	0.385474	NA	NA	NA	NA	NA	NA
uc001faa.4	LCE3E	-0.0148354	85	0.868507	0.974449	-0.0612268	0.894	0.988115	0.505941	0.227222	0.449107	NA	NA	NA	NA	NA	NA
uc001fab.3	LCE3D	-0.046454	89	0.595597	0.908537	-0.225047	0.668	0.955853	0.53712	0.232278	0.432451	NA	NA	NA	NA	NA	NA
uc001fac.2	LCE3C	0.102205	95	0.227324	0.733183	0.643354	0.308	0.858241	0.219866	0.480335	2.18468	NA	NA	NA	NA	NA	NA
uc001fag.4	LCE2D	0.0175124	73	0.856555	0.971476	0.0672446	0.876	0.986458	0.783903	0.241875	0.308552	NA	NA	NA	NA	NA	NA
uc001fah.4	LCE2C	0.217985	71	0.0265473	0.481534	1.57598	0.011	0.518643	1.81506	0.854572	0.470824	NA	NA	NA	NA	NA	NA
uc001fai.3	LCE2B	0.0856164	73	0.376848	0.819461	0.423834	0.353	0.875517	0.888195	0.284226	0.320004	NA	NA	NA	NA	NA	NA
uc001faj.3	LCE2A	-0.00681598	82	0.940472	0.984027	-0.0266541	0.952	0.9914	0.0417645	0.235708	5.64375	NA	NA	NA	NA	NA	NA
uc001fak.2	LCE4A	0.0505915	73	0.601533	0.909661	0.220741	0.669	0.955853	NA	0.243514	NA	NA	NA	NA	NA	NA	NA
uc001fal.1	KPRP	0.105695	107	0.184647	0.700609	0.733658	0.183	0.807215	1.60748	0.633312	0.393978	NA	NA	NA	NA	NA	NA
uc001fan.3	LCE1E	0.203972	82	0.0254345	0.476471	1.59458	0.051	0.650755	0.00674376	14.6002	2164.99	NA	NA	NA	NA	NA	NA
uc001fap.1	LCE1C	0.163153	65	0.112647	0.63287	0.948282	0.115	0.758412	0.49518	0.370421	0.748053	NA	NA	NA	NA	NA	NA
uc001faq.3	LCE1B	0.165954	73	0.0867216	0.604181	1.06187	0.12	0.768766	0.404369	0.387644	0.95864	NA	NA	NA	NA	NA	NA
uc001fas.4	LCE6A	0.0365302	87	0.679944	0.929357	0.167527	0.687	0.959665	0.288854	0.232309	0.804245	NA	NA	NA	NA	NA	NA
uc001fat.3	SMCP	0.109843	78	0.240795	0.740202	0.618352	0.206	0.820446	1.05247	0.250487	0.238	NA	NA	NA	NA	NA	NA
uc001fau.3	IVL	0.0565586	39	0.67329	0.928204	0.171798	NA	NA	0.857312	0.314591	0.36695	NA	NA	NA	NA	NA	NA
uc001fav.1	SPRR4	0.123162	86	0.166763	0.688646	0.7779	0.279	0.84933	1.88914	0.42728	0.226177	NA	NA	NA	NA	NA	NA
uc001faw.3	SPRR1A	0.0414537	87	0.639684	0.920493	0.194035	0.623	0.949006	0.9882	0.22476	0.227444	NA	NA	NA	NA	NA	NA
uc001faz.4	SPRR3	0.0551051	70	0.577767	0.903341	0.238248	NA	NA	0.992138	0.256679	0.258713	NA	NA	NA	NA	NA	NA
uc001fba.3	SPRR1B	0.0457007	76	0.63011	0.918606	0.200583	0.695	0.961978	1.05116	0.250702	0.238501	NA	NA	NA	NA	NA	NA
uc001fbb.2	SPRR2D	0.00159577	56	0.988538	0.998244	0.00500684	0.984	0.998331	1.89411	0.512074	0.270351	NA	NA	NA	NA	NA	NA
uc001fbd.3	SPRR2A	0.0457168	50	0.697958	0.934574	0.156171	NA	NA	NA	0.288635	NA	NA	NA	NA	NA	NA	NA
uc001fbg.3	SPRR2B	-0.0332426	55	0.766848	0.952152	-0.11529	NA	NA	NA	0.284263	NA	NA	NA	NA	NA	NA	NA
uc001fbh.3	SPRR2E	-0.091417	55	0.414858	0.834347	-0.3821	0.42	0.897682	0.117949	0.278926	2.3648	NA	NA	NA	NA	NA	NA
uc001fbi.3	SPRR2F	-0.0726438	61	0.494241	0.872074	-0.306062	0.532	0.927517	0.630124	0.293914	0.466438	NA	NA	NA	NA	NA	NA
uc001fbl.4	LELP1	-0.00941316	80	0.918888	0.981334	-0.0367376	0.926	0.989275	0.32685	0.25032	0.765856	NA	NA	NA	NA	NA	NA
uc001fbm.3	LOR	0.200643	59	0.0634809	0.558828	1.19736	NA	NA	0.631765	0.573232	0.907351	NA	NA	NA	NA	NA	NA
uc001fbn.1	PGLYRP3	0.0981792	99	0.236258	0.739894	0.626614	0.223	0.830411	1.41419	0.433013	0.306191	NA	NA	NA	NA	NA	NA
uc001fbo.3	PGLYRP4	0.0740818	92	0.389318	0.824222	0.409696	0.485	0.913132	0.709677	0.219784	0.309696	NA	NA	NA	NA	NA	NA
uc001fbq.3	S100A9	0.0419523	90	0.629767	0.918606	0.20082	0.591	0.939827	0.95936	0.229751	0.239483	NA	NA	NA	NA	NA	NA
uc001fbr.1	S100A12	-0.0442772	75	0.643071	0.920736	-0.191741	NA	NA	1.22419	0.294785	0.2408	NA	NA	NA	NA	NA	NA
uc001fbs.3	S100A8	-0.0226306	89	0.795977	0.958649	-0.0990996	0.777	0.973374	1.11804	0.264029	0.236153	NA	NA	NA	NA	NA	NA
uc001fbt.1	S100A7A	0.198917	53	0.0817805	0.596598	1.08735	NA	NA	1.79273	1.59151	0.887755	NA	NA	NA	NA	NA	NA
uc001fbv.1	S100A7	0.119016	52	0.302494	0.779445	0.519283	NA	NA	1.36071	0.407591	0.299542	NA	NA	NA	NA	NA	NA
uc001fbw.1	S100A6	0.0886147	65	0.388885	0.824222	0.410178	NA	NA	1.30943	0.334294	0.255298	NA	NA	NA	NA	NA	NA
uc001fbx.3	S100A5	0.23391	65	0.0229413	0.47177	1.63938	0.039	0.632217	0.154894	9.58124	61.8566	NA	NA	NA	NA	NA	NA
uc001fbz.3	S100A4	0.0184871	60	0.863056	0.973572	0.0639609	0.896	0.988138	0.421489	0.264565	0.62769	NA	NA	NA	NA	NA	NA
uc001fca.1	S100A3	0.104961	74	0.275279	0.759322	0.560227	NA	NA	0.964649	0.280975	0.291272	NA	NA	NA	NA	NA	NA
uc001fcb.3	S100A2	0.0711422	79	0.444453	0.848974	0.352174	0.547	0.929395	0.946503	0.269737	0.284983	NA	NA	NA	NA	NA	NA
uc001fcd.1	S100A16	-0.0661201	52	0.566758	0.898031	-0.246603	0.571	0.938566	0.927516	0.301403	0.324957	0.063281	0.429317	0.662596	13	0.455	0.971468
uc001fce.3	S100A14	0.112853	62	0.284215	0.765856	0.546353	0.257	0.847081	0.744202	0.285149	0.383161	0.063281	0.429317	0.662596	13	0.455	0.971468
uc001fch.3	S100A13	0.182863	63	0.0801812	0.595233	1.09593	0.108	0.752013	1.56082	0.409092	0.2621	0.0448971	0.560621	0.759818	14	0.606	0.984961
uc001fck.1	S100A1	0.229985	35	0.105351	0.627481	0.97736	NA	NA	3.04558	1.09883	0.360795	0.0448971	0.560621	0.759818	14	0.606	0.984961
uc001fcn.2	CHTOP	-0.0261071	39	0.845687	0.969809	-0.0727905	NA	NA	1.01728	0.322242	0.316767	0.0448971	0.560621	0.759818	14	0.606	0.984961
uc001fcq.4	SNAPIN	0.194783	42	0.131131	0.651035	0.882296	NA	NA	1.80341	0.711427	0.394489	0.0135091	0.842625	0.925029	18	0.861	0.999167
uc001fcr.4	ILF2	-0.0237826	17	0.90985	0.979867	-0.0410302	NA	NA	0.891077	0.448304	0.503104	0.00127155	0.984682	0.991272	19	0.99	0.999932
uc001fcs.4	NPR1	-0.0377613	97	0.65212	0.92318	-0.185672	0.673	0.955853	0.627705	0.238971	0.380706	0.00127155	0.984682	0.991272	19	0.99	0.999932
uc001fct.3	INTS3	0.0587335	67	0.561862	0.895476	0.25037	0.62	0.948023	1.0597	0.284247	0.268233	-0.00139357	0.98412	0.991168	17	0.91	0.999167
uc001fcz.3	SLC27A3	0.0559777	101	0.495103	0.872196	0.305304	0.503	0.919363	1.14153	0.239674	0.209959	NA	NA	NA	NA	NA	NA
uc001fdb.4	GATAD2B	0.279007	55	0.0128267	0.432546	1.89189	0.018	0.568102	0.654745	3.35492	5.12402	-0.0343786	0.551557	0.752271	25	0.92	0.999167
uc001fdd.1	DENND4B	0.0391945	112	0.614611	0.9134	0.2114	0.681	0.957511	0.0322192	1.66227	51.5926	-0.00320727	0.961376	0.982632	19	0.669	0.98782
uc001fdr.3	CREB3L4	-0.0732306	105	0.362651	0.813272	-0.440511	0.439	0.903291	1.20355	0.279888	0.232552	-0.00320727	0.961376	0.982632	19	0.669	0.98782
uc001fds.3	JTB	-0.0576984	84	0.522174	0.881196	-0.282185	0.526	0.926321	1.19464	0.276298	0.231282	-0.00320727	0.961376	0.982632	19	0.669	0.98782
uc001fdt.2	RAB13	0.0114289	63	0.912923	0.980115	0.0395658	NA	NA	1.03574	0.266619	0.257419	-0.0207505	0.76695	0.884794	17	0.761	0.993422
uc001fdv.3	RPS27	NA	NA	NA	NA	NA	NA	NA	NA	NA	NA	-0.0179559	0.815972	0.910212	14	0.709	0.988848
uc001fdw.3	NUP210L	-0.0711007	117	0.350356	0.806718	-0.455491	0.376	0.881571	0.898947	0.208545	0.231988	-0.0333731	0.48793	0.706751	36	0.883	0.999167
uc001fec.2	TPM3	0.0662266	19	0.737316	0.946069	0.132347	NA	NA	1.00592	0.410797	0.408381	-0.0385716	0.512755	0.725249	24	0.922	0.999167
uc001fee.2	C1orf189	-0.0831919	85	0.353209	0.808321	-0.451968	0.343	0.874031	0.883427	0.30063	0.340299	-0.0385716	0.512755	0.725249	24	0.922	0.999167
uc001fei.2	C1orf43	0.0718206	65	0.484962	0.86863	0.314292	0.535	0.927524	0.833988	0.374679	0.449262	-0.0312209	0.588688	0.780977	25	0.84	0.999167
uc001fep.4	UBAP2L	0.121181	82	0.184285	0.700609	0.734509	0.201	0.817764	0.599003	0.340881	0.569081	-0.0443876	0.369968	0.612121	34	0.892	0.999167
uc001fes.3	HAX1	-0.0223495	100	0.78639	0.957449	-0.104362	0.753	0.971562	0.85521	0.210869	0.24657	-0.0390449	0.451431	0.679705	31	0.912	0.999167
uc001feu.3	AQP10	0.0797105	102	0.328893	0.793367	0.482945	0.316	0.859317	0.0168018	0.379392	22.5805	-0.0296108	0.630445	0.803509	22	0.889	0.999167
uc001fex.3	ATP8B2	0.028523	104	0.724206	0.942904	0.140138	0.778	0.973444	0.571823	0.207991	0.363733	-0.0300788	0.676845	0.832783	16	0.88	0.999167
uc001fez.2	IL6R	-0.153369	104	0.0577961	0.546693	-1.2381	0.09	0.727574	2.83071	0.861042	0.304179	-0.0582478	0.379134	0.61927	19	0.747	0.991551
uc001ffb.3	SHE	-0.0422603	93	0.621449	0.916337	-0.206595	0.713	0.966394	1.09877	0.261519	0.23801	NA	NA	NA	NA	NA	NA
uc001fff.1	UBE2Q1	0.121593	33	0.406571	0.8316	0.390863	NA	NA	1.00612	0.347655	0.345541	NA	NA	NA	NA	NA	NA
uc001ffg.3	CHRNB2	0.21211	88	0.0159776	0.447536	1.79649	0.031	0.6186	0.723797	0.545283	0.753364	NA	NA	NA	NA	NA	NA
uc001ffh.3	ADAR	-0.0877916	111	0.261583	0.753895	-0.582391	0.47	0.909592	1.27089	0.442265	0.347995	-0.163878	0.0336658	0.155455	14	0.406814	0.971468
uc001ffq.3	PMVK	-0.0289149	93	0.735467	0.945399	-0.133437	0.722	0.966562	0.983404	0.261174	0.265581	-0.0640616	0.0806045	0.263719	62	0.713	0.98985
uc001ffr.3	PBXIP1	-0.024027	109	0.760807	0.951598	-0.118725	0.784	0.97527	1.07414	0.236244	0.219938	-0.0725048	0.0498258	0.19571	61	0.631	0.985384
uc001fft.3	PYGO2	0.0615911	73	0.52495	0.88175	0.279882	0.586	0.939686	0.965208	0.244484	0.253297	-0.0870727	0.0205241	0.111322	59	0.54	0.980846
uc001ffw.3	SHC1	-0.0614962	91	0.477315	0.864536	-0.321195	0.475	0.911625	1.0703	0.23693	0.221368	-0.0579439	0.100422	0.299113	67	0.721	0.990078
uc001fgb.3	CKS1B	NA	NA	NA	NA	NA	NA	NA	NA	NA	NA	-0.0402192	0.254168	0.496823	67	0.871	0.999167
uc001fgf.2	FLAD1	-0.045386	108	0.567088	0.898031	-0.246349	0.571	0.938566	0.438873	0.204904	0.466886	-0.0295163	0.375952	0.617143	75	0.919	0.999167
uc001fgi.3	LENEP	-0.172278	75	0.0713753	0.577906	-1.14645	0.096	0.737893	2.98527	0.713661	0.239061	-0.0334483	0.318952	0.562405	74	0.885	0.999167
uc001fgm.3	DCST2	-0.114466	107	0.150814	0.673421	-0.821558	0.223	0.830411	2.31382	0.507572	0.219365	-0.0264945	0.405981	0.642995	82	0.925	0.999167
uc001fgn.2	DCST1	-0.0446532	113	0.564461	0.897623	-0.248366	0.64	0.953067	1.27369	0.255297	0.20044	-0.0294764	0.358169	0.600612	81	0.905	0.999167
uc001fgr.2	ADAM15	-0.0684826	114	0.3747	0.81921	-0.426317	0.385	0.8845	1.69357	0.346707	0.204719	-0.0294764	0.358169	0.600612	81	0.905	0.999167
uc001fhf.3	EFNA3	0.00387837	47	0.974569	0.993819	0.0111876	NA	NA	0.839451	0.296724	0.353474	-0.0237475	0.453643	0.681585	83	0.953	0.999167
uc001fhh.3	EFNA1	-0.0633875	85	0.479334	0.865244	-0.319362	0.501	0.918549	0.577156	0.32079	0.555811	-0.051258	0.114564	0.322242	79	0.844	0.999167
uc001fhj.4	SLC50A1	-0.0156117	88	0.859243	0.972509	-0.0658841	0.875	0.986458	0.345987	0.247777	0.716146	-0.051258	0.114564	0.322242	79	0.844	0.999167
uc001fhm.3	DPM3	-0.11567	78	0.216749	0.724458	-0.664044	0.28	0.84933	1.80842	0.434587	0.240313	-0.0529419	0.105339	0.307647	78	0.827	0.997631
uc001fho.3	KRTCAP2	0.0781281	71	0.426616	0.839387	0.369963	0.443	0.905436	0.727759	0.247454	0.340022	-0.0615831	0.0647088	0.229456	75	0.802	0.996958
uc001fhs.2	TRIM46	0.0684662	82	0.453181	0.853883	0.343728	0.501	0.918549	0.719023	0.253433	0.352469	-0.0786089	0.0227243	0.118972	70	0.547	0.980846
uc001fix.3	THBS3	0.137419	92	0.110298	0.630968	0.957431	0.152	0.790032	0.712174	0.537786	0.755134	-0.0965768	0.0131059	0.0823655	55	0.403	0.971468
uc001fjb.3	MTX1	-0.124332	101	0.129706	0.64795	-0.88704	0.138	0.784457	1.11986	0.464342	0.414641	-0.102925	0.00944689	0.0664693	53	0.367	0.971468
uc001fjd.3	GBAP1	0.120228	106	0.133153	0.654277	0.875649	0.22	0.829829	1.1315	0.286028	0.252785	-0.0968519	0.0145941	0.0886229	53	0.42	0.971468
uc001fjl.3	GBA	0.129146	99	0.119241	0.642485	0.923574	0.09	0.727574	0.987223	0.371017	0.375818	-0.110676	0.00858388	0.0623496	47	0.305	0.970953
uc001fjm.3	FAM189B	0.233104	89	0.00773931	0.384657	2.1113	0.027	0.601664	6.81975	12.5215	1.83606	-0.110676	0.00858388	0.0623496	47	0.305	0.970953
uc001fjs.3	SCAMP3	0.0932224	84	0.30112	0.779228	0.521261	0.301	0.855547	1.24891	0.295897	0.236924	-0.110676	0.00858388	0.0623496	47	0.311	0.971468
uc001fjw.3	CLK2	0.108819	65	0.290011	0.770514	0.537585	0.335	0.86693	0.208851	0.259039	1.24031	-0.110676	0.00858388	0.0623496	47	0.311	0.971468
uc001fjz.2	HCN3	-0.0415131	98	0.618337	0.915206	-0.208775	0.659	0.955328	0.755915	0.216902	0.28694	-0.137019	0.00164261	0.0214231	44	0.158	0.907511
uc001fkb.4	PKLR	0.203502	96	0.0156614	0.44564	1.80517	0.026	0.593929	0.205912	0.651986	3.16634	-0.139231	0.00177492	0.0224581	42	0.18	0.919505
uc001fkc.2	FDPS	0.107679	103	0.185006	0.701137	0.732815	0.189	0.808991	1.446	0.30149	0.2085	-0.153271	0.00144514	0.019413	36	0.154	0.90469
uc001fki.3	RUSC1-AS1	-0.00334875	96	0.968278	0.991877	-0.0140001	0.967	0.995186	1.0916	0.241296	0.221047	-0.185508	0.00405602	0.0387111	20	0.038	0.848474
uc001fkj.2	RUSC1	-0.0150857	109	0.84842	0.9702	-0.0713889	0.844	0.982718	1.02371	0.210004	0.205141	-0.185508	0.00405602	0.0387111	20	0.038	0.848474
uc001fkt.3	ASH1L	-0.0489217	110	0.533466	0.884272	-0.272893	0.55	0.931117	0.883602	0.319215	0.361266	-0.165813	0.00489561	0.0435697	24	0.28	0.962858
uc001fkv.3	BC017347	-0.160635	84	0.0747845	0.584502	-1.12619	0.08	0.710218	0.619359	0.737334	1.19048	NA	NA	NA	NA	NA	NA
uc001fky.4	MSTO1	0.00807164	99	0.92243	0.981379	0.0350665	0.927	0.989275	0.800912	0.212115	0.264842	-0.12343	0.109643	0.314898	14	0.979	0.999932
uc001flr.3	DAP3	-0.055152	106	0.49088	0.870891	-0.309025	0.525	0.926321	1.39227	0.296033	0.212626	-0.205529	0.000639291	0.0109367	23	0.329	0.971468
uc001fly.1	GON4L	-0.134374	114	0.0815399	0.596598	-1.08863	0.176	0.801956	0.830932	0.847991	1.02053	-0.244413	0.000152903	0.00408532	20	0.102	0.89294
uc001fmg.3	SYT11	-0.0153585	85	0.863914	0.973572	-0.0635293	0.889	0.987459	0.573935	0.227817	0.396939	-0.142799	0.0153813	0.0917407	24	0.535	0.980846
uc001fmi.1	KIAA0907	-0.0297285	83	0.743111	0.946539	-0.128946	0.765	0.972237	1.09145	0.253201	0.231985	-0.169994	0.00183391	0.0228636	28	0.428	0.971468
uc001fmt.2	ARHGEF2	0.0197458	102	0.808889	0.960845	0.0921111	0.814	0.976661	1.117	0.235078	0.210455	-0.151145	0.00305975	0.0320488	32	0.499	0.977324
uc001fmx.3	SSR2	-0.196896	62	0.0617046	0.554625	-1.20968	0.063	0.679425	3.36595	0.931774	0.276823	-0.140419	0.000662368	0.0111107	49	0.414	0.971468
uc001fna.3	UBQLN4	-0.107371	87	0.225302	0.731197	-0.647236	0.298	0.85472	1.05087	0.416078	0.395936	-0.116022	0.00202293	0.0243355	59	0.552	0.980846
uc001fnb.3	LAMTOR2	NA	NA	NA	NA	NA	NA	NA	NA	0.479302	NA	-0.116022	0.00202293	0.0243355	59	0.552	0.980846
uc001fnc.3	RAB25	0.0151641	71	0.877371	0.976358	0.0568169	0.888	0.987199	0.982092	0.246333	0.250824	-0.120012	0.00154643	0.0204668	58	0.538	0.980846
uc001fnd.4	MEX3A	0.0845666	60	0.430107	0.840442	0.366423	0.511	0.921158	0.94876	0.271053	0.285692	-0.114198	0.00365201	0.0360947	54	0.484	0.97649
uc001fni.3	LMNA	0.0666301	90	0.443904	0.848531	0.352711	0.501	0.918549	0.0807064	0.250541	3.10435	-0.126016	0.00276721	0.0298822	47	0.422	0.971468
uc001fnp.3	SLC25A44	-0.151148	72	0.121356	0.64349	-0.915938	NA	NA	2.42805	0.788938	0.324927	-0.0394199	0.494768	0.71154	25	0.921	0.999167
uc001fnt.3	BGLAP	-0.0138397	94	0.870835	0.974937	-0.0600642	0.851	0.98295	1.03432	0.23969	0.231736	NA	NA	NA	NA	NA	NA
uc001foc.4	SMG5	0.083306	104	0.302759	0.779445	0.518903	0.301	0.855547	1.45713	0.321937	0.220939	NA	NA	NA	NA	NA	NA
uc001foh.4	C1orf85	0.0749141	105	0.351723	0.806997	0.453799	0.391	0.885066	0.200971	0.304106	1.51319	NA	NA	NA	NA	NA	NA
uc001fol.2	CCT3	0.107784	73	0.265908	0.755468	0.575268	0.333	0.865229	0.66974	0.270801	0.404337	-0.0494543	0.317858	0.561102	34	0.812	0.997631
uc001foo.3	TSACC	0.0301861	72	0.757035	0.950714	0.120884	NA	NA	0.254524	0.243301	0.955903	-0.0458036	0.347916	0.590318	35	0.832	0.997631
uc001fot.1	BC016978	0.0331269	81	0.718348	0.941817	0.143665	0.746	0.970955	0.95206	0.238338	0.250339	NA	NA	NA	NA	NA	NA
uc001fou.1	C1orf61	-0.171721	84	0.0568118	0.544928	-1.24556	0.061	0.677218	1.49796	0.845436	0.564393	-0.0902759	0.0110754	0.0738971	66	0.595	0.984337
uc001fpb.4	MEF2D	0.0389444	75	0.68357	0.930886	0.165217	0.686	0.959482	1.08834	0.270158	0.248231	-0.0896215	0.0110559	0.0738585	67	0.621	0.984961
uc001fpf.3	IQGAP3	0.0569672	115	0.458254	0.856405	0.338894	0.511	0.921158	0.23199	0.214438	0.924338	-0.122945	0.00260161	0.028917	50	0.448	0.971468
uc001fph.3	APOA1BP	-0.0889499	91	0.30401	0.780396	-0.517112	0.312	0.858861	0.617358	0.348703	0.564831	-0.173802	0.000660108	0.0111107	32	0.293	0.966111
uc001fpl.3	GPATCH4	-0.0100331	111	0.897911	0.978669	-0.0467667	0.913	0.988138	0.677709	0.203555	0.300357	-0.164543	0.00214518	0.0252796	29	0.335	0.971468
uc001fpn.1	HAPLN2	-0.039989	90	0.645878	0.921868	-0.189849	0.648	0.953957	0.650187	0.245567	0.377687	-0.125007	0.0472172	0.189622	21	0.426	0.971468
uc001fpp.3	BCAN	-0.0111199	112	0.886409	0.978069	-0.0523659	0.918	0.988365	1.06061	0.214946	0.202662	-0.16366	0.00159727	0.0209503	31	0.119	0.89294
uc001fpq.3	NES	-0.119449	117	0.116659	0.637071	-0.933081	0.221	0.830411	2.00349	0.447991	0.223605	-0.175943	0.000463453	0.00873201	33	0.072	0.879994
uc001fpr.3	CRABP2	-0.0463255	61	0.662892	0.924743	-0.178557	NA	NA	1.1347	0.325957	0.287262	-0.164514	0.000527646	0.00962178	37	0.11	0.89294
uc001fps.1	ISG20L2	-0.196062	94	0.0212521	0.469285	-1.6726	0.025	0.59117	8.98445	2.07832	0.231324	-0.165549	0.000407877	0.00799643	38	0.111	0.89294
uc001fpu.3	RRNAD1	-0.161066	103	0.0474033	0.531837	-1.32419	0.06	0.669481	2.34081	1.00119	0.427709	-0.165549	0.000407877	0.00799643	38	0.111	0.89294
uc001fpx.1	MRPL24	-0.0357828	90	0.680952	0.929644	-0.166884	0.728	0.967559	0.941983	0.242963	0.257927	-0.168234	0.000273465	0.00612258	39	0.094	0.89294
uc001fpy.4	HDGF	0.116041	81	0.206449	0.72244	0.685187	0.202	0.817764	2.3659	0.85793	0.362622	-0.165364	0.000291543	0.00636162	40	0.12	0.89294
uc001fqa.3	PRCC	0.0501129	85	0.576001	0.903341	0.239577	0.594	0.940921	0.879013	0.229714	0.261331	-0.0895198	0.0214711	0.114517	55	0.532	0.980846
uc001fqh.1	NTRK1	0.0545133	106	0.495915	0.872609	0.304593	0.584	0.939686	0.998507	0.205449	0.205756	-0.107688	0.0114097	0.0755686	46	0.334	0.971468
uc001fqj.1	PEAR1	-0.0360281	113	0.641985	0.920493	-0.192475	0.677	0.956975	1.07558	0.22008	0.204616	-0.0702421	0.144327	0.364606	36	0.694	0.98825
uc001fqm.2	LRRC71	-0.0531788	101	0.516918	0.879946	-0.286579	0.445	0.905436	0.954692	0.232966	0.244023	-0.0798768	0.117542	0.326742	32	0.607	0.984961
uc001fqn.3	ARHGEF11	0.0610791	114	0.428514	0.839655	0.368035	0.474	0.911402	0.873637	0.199227	0.228043	-0.0755898	0.0641106	0.228369	50	0.656	0.98782
uc001fqq.2	ETV3L	0.0841793	106	0.293032	0.773282	0.533085	0.352	0.87533	0.549774	0.29363	0.534093	-0.0639339	0.298914	0.544025	22	0.94	0.999167
uc001fqr.2	ETV3	0.069221	99	0.403688	0.830562	0.393954	0.459	0.909126	1.01808	0.215842	0.212009	-0.0435328	0.500067	0.716095	20	0.958	0.999167
uc001fqw.3	FCRL4	-0.138252	92	0.108155	0.63071	-0.965952	0.127	0.774157	2.92774	0.736337	0.251504	NA	NA	NA	NA	NA	NA
uc001frb.3	FCRL3	-0.106904	93	0.211612	0.724458	-0.674459	0.246	0.839606	0.926549	0.309445	0.333976	NA	NA	NA	NA	NA	NA
uc001fre.2	FCRL2	-0.00328215	98	0.96858	0.991877	-0.0138647	0.973	0.995794	0.818394	0.216789	0.264896	NA	NA	NA	NA	NA	NA
uc001frg.3	FCRL1	-0.0479265	108	0.545589	0.889101	-0.263134	0.597	0.941279	1.42581	0.290506	0.203748	NA	NA	NA	NA	NA	NA
uc001frk.4	CD5L	-0.00505039	105	0.949941	0.987373	-0.0223034	0.95	0.991279	0.845737	0.208515	0.246549	NA	NA	NA	NA	NA	NA
uc001frn.4	KIRREL	-0.0944174	82	0.300927	0.779228	-0.521538	0.406	0.889977	2.13648	0.497602	0.232908	-0.0723442	0.0563413	0.210431	58	0.717	0.990043
uc001frp.2	hCG_1995134	-0.0238378	86	0.788995	0.957892	-0.102926	0.79	0.975675	0.253308	0.234268	0.924834	NA	NA	NA	NA	NA	NA
uc001frr.3	CD1D	-0.0694713	81	0.44943	0.851801	-0.347337	0.463	0.909592	0.0505156	0.24926	4.93432	NA	NA	NA	NA	NA	NA
uc001frt.3	CD1A	-0.0122916	78	0.895569	0.978669	-0.0479007	0.918	0.988365	1.00652	0.267284	0.265552	NA	NA	NA	NA	NA	NA
uc001fru.3	CD1C	-0.0331726	82	0.716275	0.940587	-0.14492	0.823	0.978226	1.23181	0.28351	0.230158	NA	NA	NA	NA	NA	NA
uc001frx.3	CD1B	-0.0159035	72	0.870523	0.974803	-0.0602197	NA	NA	1.02231	0.24845	0.243028	NA	NA	NA	NA	NA	NA
uc001fse.3	CD1E	-0.0128374	82	0.888148	0.978378	-0.0515146	0.889	0.987459	0.654866	0.234642	0.358306	NA	NA	NA	NA	NA	NA
uc001fst.1	SPTA1	0.0872555	119	0.247676	0.744807	0.606116	0.295	0.852424	1.41786	0.288491	0.20347	NA	NA	NA	NA	NA	NA
uc001fsu.1	OR6K2	0.196588	99	0.0177136	0.457897	1.75169	0.038	0.627182	0.724664	0.486271	0.671029	NA	NA	NA	NA	NA	NA
uc001fsw.1	OR6K6	0.0745868	105	0.353831	0.808861	0.451204	0.419	0.897236	2.64637e-05	0.767613	29006.3	NA	NA	NA	NA	NA	NA
uc001fsz.1	MNDA	-0.0583631	89	0.504896	0.87631	-0.296798	0.575	0.939039	1.38783	0.358809	0.25854	NA	NA	NA	NA	NA	NA
uc001ftb.3	PYHIN1	-0.0793523	85	0.375869	0.819422	-0.424964	0.462	0.909127	1.61794	0.397212	0.245504	NA	NA	NA	NA	NA	NA
uc001ftj.1	AIM2	0.0693728	69	0.486674	0.869402	0.312762	NA	NA	0.845792	0.268583	0.317552	-0.01734	0.783121	0.89399	21	0.968	0.999312
uc001ftk.2	CADM3	0.0563145	85	0.529714	0.883009	0.275959	0.655	0.95481	0.994049	0.227942	0.229307	-0.0234854	0.598049	0.785182	42	0.807	0.997213
uc001ftp.4	DARC	-0.0135028	112	0.86229	0.973196	-0.0643469	0.866	0.984178	1.07267	0.21841	0.203614	NA	NA	NA	NA	NA	NA
uc001ftq.3	FCER1A	-0.00267403	104	0.973612	0.993587	-0.0116143	0.981	0.998299	1.16129	0.242312	0.208657	0.0789192	0.233412	0.473343	19	0.774	0.994873
uc001ftv.3	APCS	0.059102	100	0.473592	0.863136	0.324595	0.488	0.913228	1.7717	0.626217	0.353456	NA	NA	NA	NA	NA	NA
uc001ftw.3	CRP	0.113524	97	0.175316	0.695432	0.756179	0.288	0.85091	0.0395919	7.82164	197.557	0.0157806	0.802201	0.903352	21	0.553	0.980846
uc001ftz.1	DUSP23	0.101963	62	0.333263	0.795148	0.477213	NA	NA	5.248	1.73175	0.329983	0.0698461	0.235907	0.476007	24	0.508	0.977493
uc001fud.4	FCRL6	0.0356645	91	0.680247	0.929357	0.167333	0.628	0.949738	0.993305	0.220712	0.2222	0.0502946	0.374358	0.615761	26	0.714	0.98985
uc001fue.4	SLAMF8	-0.0636544	104	0.431028	0.840977	-0.365495	0.41	0.892798	1.18792	0.257146	0.216468	0.0695422	0.237951	0.478515	24	0.656	0.98782
uc001fuh.3	VSIG8	0.12791	107	0.108405	0.63071	0.96495	0.189	0.808991	0.000901427	44.0449	48861.3	0.0192876	0.728471	0.863497	27	0.887	0.999167
uc001fui.3	CCDC19	-0.0528419	102	0.517476	0.880368	-0.28611	0.556	0.933305	0.658288	0.220733	0.335313	NA	NA	NA	NA	NA	NA
uc001fur.2	IGSF9	0.0848953	111	0.277647	0.762289	0.556507	0.262	0.848573	0.927985	0.225299	0.242783	-0.00329414	0.959301	0.982461	20	0.935	0.999167
uc001fus.3	SLAMF9	-0.0030871	111	0.96851	0.991877	-0.0138959	0.978	0.997808	0.976937	0.204942	0.209781	-0.00596894	0.921011	0.964448	23	0.917	0.999167
uc001fuv.1	PIGM	-0.0821577	101	0.316692	0.786989	-0.499362	0.35	0.874954	2.12577	0.450309	0.211834	0.0657896	0.177592	0.407397	35	0.63	0.985384
uc001fuw.2	KCNJ10	0.0690403	63	0.508883	0.877828	0.293382	NA	NA	0.106886	0.439812	4.11476	0.0735432	0.126394	0.339636	36	0.569	0.981893
uc001fuy.1	KCNJ9	-0.162139	61	0.127077	0.645084	-0.895935	0.205	0.819205	1.85887	0.584508	0.314443	0.124602	0.0146241	0.0886908	32	0.39	0.971468
uc001fvc.3	ATP1A2	-0.0347204	70	0.72579	0.942904	-0.139189	0.735	0.9692	1.02431	0.254689	0.248644	0.00344569	0.934098	0.971334	48	0.851	0.999167
uc001fve.4	ATP1A4	0.0635404	115	0.408062	0.8316	0.389274	0.462	0.909127	0.437495	0.226175	0.516976	-0.034222	0.406668	0.643325	49	0.913	0.999167
uc001fvk.3	PEA15	NA	NA	NA	NA	NA	NA	NA	NA	NA	NA	-0.0785232	0.107583	0.311689	35	0.645	0.985384
uc001fvv.4	COPA	-0.00872373	81	0.924331	0.981379	-0.0341723	0.932	0.989522	0.968919	0.231536	0.238963	-0.0855081	0.0266629	0.133062	56	0.518	0.980127
uc001fvx.3	NCSTN	-0.050693	100	0.538764	0.886971	-0.268601	0.546	0.929395	1.41404	0.313656	0.221815	-0.0210538	0.65303	0.816985	38	0.872	0.999167
uc001fwa.2	NHLH1	-0.122236	52	0.289601	0.769856	-0.538199	NA	NA	1.03276	0.380891	0.36881	-0.00552378	0.911166	0.959006	34	1	1
uc001fwc.2	VANGL2	0.00848555	32	0.954561	0.988561	0.0201964	NA	NA	1.09393	0.404532	0.369798	-0.0129274	0.796995	0.900762	33	0.957	0.999167
uc001fwe.2	SLAMF6	-0.0284618	103	0.726071	0.942904	-0.139021	0.726	0.967559	0.642448	0.226825	0.353063	0.106677	0.166771	0.393781	14	0.344	0.971468
uc001fwh.4	CD84	-0.0882596	106	0.270261	0.756312	-0.568216	0.344	0.874562	1.3864	0.417001	0.30078	NA	NA	NA	NA	NA	NA
uc001fwl.4	SLAMF1	-0.266652	100	0.00122367	0.283041	-2.91234	0.001	0.200844	8.81446	12.7012	1.44095	NA	NA	NA	NA	NA	NA
uc001fwo.2	CD48	0.059084	97	0.480573	0.866209	0.31824	0.579	0.939039	0.490036	0.23531	0.480189	NA	NA	NA	NA	NA	NA
uc001fwq.3	SLAMF7	-0.121709	110	0.121327	0.64349	-0.916043	0.105	0.746586	0.607264	0.600332	0.988585	NA	NA	NA	NA	NA	NA
uc001fwu.4	LY9	-0.0937719	78	0.316645	0.786989	-0.499428	NA	NA	0.243822	0.31846	1.30612	NA	NA	NA	NA	NA	NA
uc001fxc.3	ITLN1	0.201687	74	0.0360487	0.511258	1.44311	NA	NA	3.73401	0.945112	0.253109	NA	NA	NA	NA	NA	NA
uc001fxd.3	ITLN2	0.111206	73	0.251029	0.747372	0.600276	NA	NA	0.886927	0.306034	0.34505	NA	NA	NA	NA	NA	NA
uc001fxl.3	ARHGAP30	-0.233056	117	0.00220474	0.299334	-2.65664	0.002	0.294571	2.43309	4.46009	1.8331	-0.0701611	0.215258	0.451406	26	0.737	0.990245
uc001fxo.2	PVRL4	-0.0291071	96	0.729594	0.943956	-0.136919	0.779	0.97375	0.418325	0.223602	0.534517	-0.0701611	0.215258	0.451406	26	0.737	0.990245
uc001fxr.3	KLHDC9	-0.0798684	90	0.358759	0.811219	-0.445198	0.365	0.877191	1.40256	0.32541	0.232011	-0.0857586	0.103722	0.305206	30	0.669	0.98782
uc001fxu.3	PFDN2	0.0971429	50	0.409587	0.831666	0.387654	NA	NA	0.911758	0.304487	0.333956	-0.0689305	0.15197	0.376134	36	0.718	0.990067
uc001fxv.2	NIT1	-0.0274537	91	0.751058	0.949285	-0.124327	0.733	0.9692	0.887838	0.237566	0.267578	-0.0677087	0.165279	0.392328	35	0.718	0.990067
uc001fxz.3	DEDD	-0.0588509	59	0.586214	0.905847	-0.231944	0.633	0.951161	1.08475	0.326655	0.301134	-0.0677087	0.165279	0.392328	35	0.718	0.990067
uc001fyd.4	UFC1	NA	NA	NA	NA	NA	NA	NA	1.1992	0.450673	0.375813	-0.0552377	0.250958	0.493401	36	0.777	0.994873
uc001fyg.2	PPOX	-0.0724316	104	0.370245	0.815654	-0.43151	0.415	0.89624	1.07152	0.263095	0.245534	-0.0537994	0.211266	0.446977	45	0.797	0.996958
uc001fys.2	B4GALT3	0.0886057	78	0.344042	0.803538	0.463388	0.382	0.884243	1.25541	0.307501	0.244939	-0.0426887	0.337916	0.581593	42	0.856	0.999167
uc001fyt.4	ADAMTS4	-0.0285703	110	0.716104	0.940429	-0.145024	0.759	0.972237	1.18936	0.24194	0.203419	-0.0367229	0.464941	0.690133	33	0.86	0.999167
uc001fyw.3	NDUFS2	-0.000512507	98	0.995092	1	-0.00213657	0.993	1	1.08624	0.232299	0.213856	-0.0490371	0.344279	0.587465	31	0.782	0.994873
uc001fyz.1	FCER1G	-0.0685968	62	0.515086	0.87896	-0.28812	0.471	0.910502	1.29753	0.340407	0.262349	-0.0607001	0.234278	0.474503	32	0.716	0.98985
uc001fzc.1	APOA2	-0.0398062	95	0.638209	0.920493	-0.195037	0.667	0.955853	0.93373	0.258577	0.276929	-0.0459026	0.346874	0.589149	35	0.777	0.994873
uc001fzd.3	TOMM40L	-0.097473	58	0.371523	0.81674	-0.430015	NA	NA	1.34732	0.362552	0.269091	-0.0459026	0.346874	0.589149	35	0.777	0.994873
uc001fzp.3	NR1I3	0.135877	109	0.0851504	0.604181	1.06981	0.139	0.784457	0.366911	0.536425	1.462	-0.059308	0.211439	0.447119	37	0.692	0.98825
uc001gad.3	PCP4L1	0.0645259	45	0.604122	0.91092	0.218875	NA	NA	0.961769	0.309973	0.322294	-0.0607516	0.219803	0.45754	34	0.687	0.98782
uc001gaf.4	MPZ	0.132635	78	0.156663	0.67938	0.805035	0.187	0.808938	1.1484	0.328082	0.285687	-0.0318376	0.596872	0.784643	23	0.805	0.996958
uc001gag.3	SDHC	0.0780421	87	0.378135	0.819461	0.422353	0.447	0.905436	1.88247	0.504181	0.26783	0.00171438	0.976312	0.98785	25	0.945	0.999167
uc001gal.4	C1orf192	-0.0144517	86	0.871116	0.974937	-0.0599242	0.874	0.986458	1.0071	0.235711	0.234049	NA	NA	NA	NA	NA	NA
uc001gan.3	FCGR2A	0.00716553	77	0.939407	0.98388	0.0271461	0.939	0.989861	0.997276	0.239433	0.240087	0.0769093	0.318845	0.562278	14	0.572527	0.982174
uc001gaq.3	HSPA6	0.136242	70	0.168742	0.689774	0.772777	NA	NA	0.467996	0.330549	0.706306	0.0884499	0.251624	0.493934	14	0.470264	0.971468
uc001gar.3	FCGR3A	-0.0193194	105	0.810207	0.961157	-0.0914039	0.837	0.981347	0.954613	0.213921	0.224091	0.0597574	0.455454	0.682906	13	0.517634	0.980127
uc001gaz.2	FCGR2B	0.0457429	110	0.560391	0.895377	0.251509	0.54	0.927524	0.940173	0.209892	0.223248	0.0900991	0.323658	0.566891	10	0.476323	0.973726
uc001gbe.3	FCRLA	-0.0798457	108	0.313981	0.786897	-0.503097	0.349	0.874954	0.884033	0.354658	0.401181	NA	NA	NA	NA	NA	NA
uc001gbi.3	FCRLB	0.0226217	103	0.780655	0.95628	0.107541	0.804	0.97597	0.717494	0.210256	0.293042	NA	NA	NA	NA	NA	NA
uc001gbo.3	DUSP12	-0.0427299	97	0.609956	0.911822	-0.214702	0.594	0.940921	1.06439	0.236394	0.222094	-0.123632	0.175641	0.405148	10	0.391348	0.971468
uc001gbs.3	ATF6	0.0140848	109	0.858367	0.972353	0.0663272	0.859	0.984084	0.887121	0.206643	0.232937	-0.206548	6.78966e-05	0.00222007	31	0.075	0.890991
uc001gbu.3	OLFML2B	0.0578831	111	0.459181	0.857455	0.338016	0.442	0.905248	0.933767	0.201325	0.215605	-0.161436	0.00435267	0.0405663	26	0.206	0.927633
uc001gbv.2	NOS1AP	0.0108	86	0.903496	0.978944	0.0440736	0.923	0.989275	1.10885	0.249985	0.225446	-0.147264	0.00094691	0.0143326	42	0.318	0.971468
uc001gbx.2	C1orf111	-0.0294144	104	0.715955	0.940429	-0.145114	0.761	0.972237	1.1101	0.238618	0.214951	NA	NA	NA	NA	NA	NA
uc001gbz.1	SH2D1B	-0.091327	87	0.30237	0.779445	-0.519462	0.224	0.830535	1.64923	0.370393	0.224586	NA	NA	NA	NA	NA	NA
uc001gcc.2	UHMK1	NA	NA	NA	NA	NA	NA	NA	NA	0.327818	NA	NA	NA	NA	NA	NA	NA
uc001gce.4	UAP1	-0.0795963	89	0.36314	0.813272	-0.439926	0.366	0.877277	1.66478	0.421029	0.252904	NA	NA	NA	NA	NA	NA
uc001gcg.3	DDR2	-0.137552	84	0.127074	0.645084	-0.895945	0.175	0.800229	1.81612	0.591025	0.325432	-0.1566	0.0180529	0.101966	19	0.132	0.89373
uc001gci.3	HSD17B7	0.0327264	99	0.692992	0.933895	0.159272	0.709	0.966052	1.22346	0.359256	0.29364	-0.0743838	0.302699	0.547735	16	0.741	0.990245
uc001gck.2	C1orf110	-0.0488962	98	0.557328	0.895377	-0.25389	0.5	0.918549	0.977175	0.255272	0.261235	-0.083492	0.247327	0.489965	16	0.391	0.971468
uc001gcl.4	RGS4	-0.0269876	92	0.753821	0.950085	-0.122731	0.776	0.973374	0.927242	0.261146	0.281637	-0.160997	0.0777996	0.257574	10	0.361746	0.971468
uc001gcr.1	NUF2	-0.266576	87	0.00260843	0.311498	-2.58362	0.008	0.496867	10.8238	5.4287	0.501553	-0.0498178	0.263427	0.506148	42	0.835	0.997631
uc001gct.3	PBX1	NA	NA	NA	NA	NA	NA	NA	NA	NA	NA	-0.103701	1.26697e-06	0.000119436	182	0.684	0.98782
uc001gcz.2	LMX1A	0.0906154	63	0.385937	0.822754	0.413483	NA	NA	1.07035	0.279157	0.26081	-0.0919668	0.00370757	0.0364504	83	0.661	0.98782
uc001gda.3	RXRG	-0.0621312	70	0.53025	0.883009	-0.275519	0.565	0.936921	1.3613	0.340568	0.250179	-0.0374447	0.323268	0.566596	58	0.979	0.999932
uc001gde.2	LRRC52	-0.135066	96	0.108715	0.63071	-0.963712	0.129	0.775354	2.6722	0.588026	0.220053	-0.0541367	0.348432	0.590952	25	0.708	0.988848
uc001gdf.3	MGST3	-0.05485	80	0.552922	0.892433	-0.257336	0.547	0.929395	0.862457	0.250696	0.290676	-0.078354	0.293166	0.537088	15	0.524	0.980846
uc001gdh.1	ALDH9A1	-0.0381671	103	0.63848	0.920493	-0.194853	0.657	0.955204	1.16701	0.245514	0.210379	NA	NA	NA	NA	NA	NA
uc001gdj.5	TMCO1	0.0397793	79	0.668956	0.92783	0.174603	0.662	0.955853	0.995355	0.234086	0.235178	NA	NA	NA	NA	NA	NA
uc001gdp.3	UCK2	0.0108548	46	0.929696	0.982837	0.0316592	NA	NA	1.00386	0.293547	0.292419	NA	NA	NA	NA	NA	NA
uc001gdt.1	POGK	-0.167152	89	0.0561673	0.543472	-1.25052	0.109	0.752874	2.53003	1.08547	0.429032	-0.147214	0.0482645	0.192548	15	0.346	0.971468
uc001gdw.3	TADA1	-0.122169	60	0.254353	0.749993	-0.594563	0.265	0.848573	2.04466	0.537446	0.262853	-0.153762	0.012481	0.0798073	22	0.259	0.959755
uc001gdx.2	ILDR2	-0.016188	84	0.857498	0.971766	-0.0667667	0.915	0.988138	0.791954	0.257671	0.325361	-0.143082	0.0132063	0.0827706	25	0.259	0.959755
uc001gdy.1	MAEL	0.134152	97	0.109246	0.63071	0.961594	0.148	0.787424	1.99734	0.435722	0.218151	-0.143082	0.0132063	0.0827706	25	0.259	0.959755
uc001gea.1	GPA33	0.0491292	104	0.543352	0.888007	0.264918	0.549	0.930646	1.16545	0.245817	0.21092	-0.087717	0.273272	0.516562	13	0.666667	0.98782
uc001geb.1	DUSP27	-0.0671444	111	0.390546	0.825145	-0.408327	0.47	0.909592	1.37192	0.296717	0.216279	-0.0324725	0.633197	0.804726	18	0.958	0.999167
uc001gee.3	POU2F1	-0.0494203	82	0.588195	0.906685	-0.230479	0.594	0.940921	0.636805	0.265493	0.416915	-0.0233838	0.626971	0.801362	36	0.945	0.999167
uc001gei.4	CD247	0.0444845	93	0.603212	0.910338	0.21953	0.635	0.951761	0.900594	0.243615	0.270505	0.0295034	0.692238	0.841291	15	0.749	0.992102
uc001gel.3	CREG1	-0.0522998	84	0.561837	0.895476	-0.25039	0.542	0.927524	0.820851	0.276729	0.337125	0.0147106	0.859883	0.934744	12	0.827828	0.997631
uc001gem.3	RCSD1	0.0932961	101	0.255528	0.750735	0.592561	0.249	0.839683	1.29802	0.309072	0.23811	0.00421	0.961423	0.982632	11	0.92551	0.999167
uc001geo.3	MPZL1	-0.117949	71	0.230062	0.734066	-0.638155	0.307	0.858235	0.738212	0.449807	0.609319	NA	NA	NA	NA	NA	NA
uc001ger.3	ADCY10	-0.191931	113	0.0132577	0.432546	-1.87753	0.052	0.655938	0.278281	3.55361	12.7699	NA	NA	NA	NA	NA	NA
uc001get.3	MPC2	0.0341523	57	0.756332	0.950714	0.121287	NA	NA	0.754952	0.268087	0.355105	NA	NA	NA	NA	NA	NA
uc001gex.3	DCAF6	-0.0836804	109	0.289042	0.769466	-0.539039	0.297	0.85472	0.567452	0.328866	0.579548	-0.1912	0.0280432	0.138328	11	0.217347	0.93937
uc001gfg.3	TIPRL	0.0714011	72	0.464299	0.859304	0.333202	0.481	0.912484	1.00034	0.243165	0.243083	-0.0765122	0.379379	0.619426	11	0.786359	0.995716
uc001gfi.4	SFT2D2	0.0380679	83	0.674725	0.928204	0.170874	0.71	0.966052	0.994309	0.231021	0.232343	-0.101743	0.265055	0.507566	10	0.65368	0.98782
uc001gfl.3	TBX19	-0.104539	93	0.221897	0.728768	-0.653849	0.349	0.874954	1.65427	0.373166	0.225577	NA	NA	NA	NA	NA	NA
uc001gfn.4	XCL2	-0.101226	92	0.239482	0.740202	-0.620728	0.205	0.819205	1.58532	0.383449	0.241874	NA	NA	NA	NA	NA	NA
uc001gfo.2	XCL1	-0.17169	98	0.0393512	0.511764	-1.40504	0.027	0.601664	3.334	0.913528	0.274004	NA	NA	NA	NA	NA	NA
uc001gfp.3	DPT	-0.00200474	66	0.984325	0.996633	-0.00686147	NA	NA	0.968426	0.252332	0.260559	NA	NA	NA	NA	NA	NA
uc001gfr.1	ATP1B1	-0.0989775	95	0.242341	0.741396	-0.615573	0.232	0.833035	0.17618	0.373051	2.11744	0.110298	0.205082	0.44004	11	0.437563	0.971468
uc001gfu.3	NME7	-0.111441	97	0.18337	0.700609	-0.736672	0.203	0.817764	2.02133	0.480283	0.237607	0.0697339	0.402711	0.640351	12	0.701103	0.988837
uc001gfy.3	BLZF1	-0.016613	99	0.841158	0.968649	-0.0751225	0.848	0.98295	1.02669	0.235436	0.229316	NA	NA	NA	NA	NA	NA
uc001gfz.1	CCDC181	-0.131115	108	0.098241	0.618557	-1.00771	0.087	0.723752	1.45433	0.695151	0.477987	NA	NA	NA	NA	NA	NA
uc001gge.4	SLC19A2	-0.0680912	96	0.41873	0.837683	-0.378066	0.449	0.905436	0.897454	0.250537	0.279165	NA	NA	NA	NA	NA	NA
uc001ggg.1	F5	-0.0775604	119	0.304154	0.780445	-0.516907	0.489	0.913663	0.867822	0.328854	0.378942	NA	NA	NA	NA	NA	NA
uc001ggi.4	SELP	-0.109942	114	0.154121	0.67589	-0.812139	0.197	0.815031	0.867346	0.277167	0.319558	NA	NA	NA	NA	NA	NA
uc001ggk.3	SELL	0.030223	110	0.700454	0.935697	0.15462	0.734	0.9692	1.07214	0.217927	0.203263	NA	NA	NA	NA	NA	NA
uc001ggm.4	SELE	-0.148077	116	0.0528059	0.537577	-1.27732	0.05	0.650755	1.69739	0.705645	0.415724	NA	NA	NA	NA	NA	NA
uc001ggn.4	METTL18	-0.145369	106	0.0693982	0.573032	-1.15865	0.068	0.687333	1.29076	0.547653	0.424287	NA	NA	NA	NA	NA	NA
uc001ggq.3	C1orf112	-0.11305	117	0.13757	0.658498	-0.861476	0.227	0.832082	1.15739	0.431507	0.372827	-0.0306424	0.701931	0.847583	13	0.492	0.97649
uc001ggs.3	SCYL3	-0.0412734	105	0.607905	0.911316	-0.216164	0.666	0.955853	1.06327	0.26348	0.247802	-0.0182251	0.783175	0.89399	19	0.651	0.987279
uc001ggv.3	KIFAP3	0.11863	68	0.237756	0.740202	0.623868	0.281	0.84933	0.986059	0.24904	0.252561	-0.0282113	0.476837	0.699294	53	0.681	0.98782
uc001gha.2	GORAB	-0.00665335	110	0.932508	0.983206	-0.0303476	0.931	0.989275	1.01786	0.205775	0.202163	-0.0355269	0.398864	0.637423	47	0.694	0.98825
uc001ghf.3	PRRX1	0.0754851	27	0.643429	0.920736	0.191499	NA	NA	NA	0.359728	NA	-0.0174825	0.599993	0.785949	75	0.682	0.98782
uc001ghh.3	FMO3	0.0555787	109	0.481321	0.866693	0.317565	0.568	0.937573	1.0049	0.215408	0.214357	0.208971	0.0220723	0.116411	10	0.493	0.97649
uc001ghj.1	FMO6P	0.16106	106	0.0442385	0.525697	1.3542	0.105	0.746586	0.861425	0.477353	0.554144	0.208971	0.0220723	0.116411	10	0.493	0.97649
uc001ghk.1	FMO2	0.130213	109	0.0989858	0.618557	1.00443	0.149	0.787424	0.045447	0.599764	13.197	0.208971	0.0220723	0.116411	10	0.493	0.97649
uc001ghl.3	FMO1	0.100678	111	0.197937	0.713242	0.703473	0.267	0.848573	0.121673	0.443899	3.6483	NA	NA	NA	NA	NA	NA
uc001gho.3	FMO4	-0.125647	106	0.116538	0.637071	-0.933531	0.165	0.794435	1.37331	0.583464	0.424859	NA	NA	NA	NA	NA	NA
uc001ghu.3	MYOC	-0.0224975	106	0.778695	0.955666	-0.108632	0.806	0.976381	1.12821	0.2319	0.205547	NA	NA	NA	NA	NA	NA
uc001ghx.2	VAMP4	0.0765107	53	0.503216	0.875998	0.298246	NA	NA	0.790046	0.298878	0.378305	NA	NA	NA	NA	NA	NA
uc001ghz.3	METTL13	0.0077737	114	0.919736	0.981379	0.0363369	0.938	0.989861	0.986726	0.207536	0.210327	-0.107404	0.197459	0.431248	12	0.159	0.907511
uc001gie.4	DNM3	-0.0616905	78	0.510034	0.877828	-0.2924	0.542	0.927524	0.794556	0.34245	0.430995	-0.0990852	4.60494e-05	0.00166274	141	0.103	0.89294
uc001gik.3	C1orf105	-0.0761944	94	0.370689	0.816343	-0.43099	0.39	0.885066	0.339352	0.320284	0.943809	-0.1525	3.6986e-05	0.00141956	61	0.043	0.850463
uc001gio.3	PIGC	-0.0277566	82	0.761048	0.951598	-0.118588	0.788	0.975371	1.02317	0.239825	0.234393	-0.163352	7.47166e-05	0.00239094	49	0.015	0.788781
uc001giq.4	SUCO	-0.116605	114	0.130662	0.65043	-0.883851	0.132	0.776485	0.132495	0.470576	3.55164	NA	NA	NA	NA	NA	NA
uc001gis.3	FASLG	-0.164285	99	0.0474949	0.531837	-1.32335	0.049	0.650755	2.52013	1.3479	0.534855	-0.0566496	0.496643	0.713146	12	0.64783	0.985975
uc001giu.2	TNFSF18	-0.150278	98	0.0713062	0.577596	-1.14687	0.09	0.727574	1.29884	0.722365	0.556163	NA	NA	NA	NA	NA	NA
uc001giw.3	TNFSF4	-0.233205	90	0.00736968	0.377585	-2.13255	0.02	0.571719	1.21759	2.22236	1.82521	NA	NA	NA	NA	NA	NA
uc001giy.1	PRDX6	-0.0618499	68	0.538202	0.88654	-0.269055	0.607	0.944297	1.12826	0.318004	0.281852	NA	NA	NA	NA	NA	NA
uc001giz.2	SLC9C2	-0.186011	115	0.0154395	0.444301	-1.81137	0.049	0.650755	1.15774	0.947522	0.818423	NA	NA	NA	NA	NA	NA
uc001gja.1	ANKRD45	-0.157008	97	0.0608677	0.55143	-1.21561	0.072	0.695056	0.877393	1.09048	1.24286	NA	NA	NA	NA	NA	NA
uc001gjc.3	KLHL20	0.179109	21	0.337827	0.798503	0.471306	NA	NA	1.00346	0.392237	0.390886	NA	NA	NA	NA	NA	NA
uc001gje.4	CENPL	-0.190234	102	0.0198003	0.46207	-1.70333	0.054	0.663312	1.27677	0.925113	0.72457	NA	NA	NA	NA	NA	NA
uc001gjh.2	DARS2	0.0155199	110	0.843395	0.969228	0.0739689	0.84	0.982035	0.926323	0.202097	0.218171	NA	NA	NA	NA	NA	NA
uc001gjt.3	SERPINC1	-0.132024	106	0.0991212	0.618557	-1.00383	0.1	0.739245	3.24059	0.722496	0.222952	NA	NA	NA	NA	NA	NA
uc001gju.4	RC3H1	-0.0446118	105	0.579192	0.903728	-0.237178	0.624	0.949006	0.998599	0.234907	0.235236	-0.118023	0.196062	0.429851	10	0.557816	0.98175
uc001gjx.3	RABGAP1L	0.0530633	100	0.51995	0.881196	0.284039	0.577	0.939039	1.0152	0.214764	0.211549	-0.0522327	0.101369	0.300546	82	0.425	0.971468
uc001gka.1	GPR52	0.0215917	78	0.817645	0.963156	0.087435	0.812	0.976661	0.926836	0.234946	0.253493	-0.0384219	0.437726	0.668623	34	0.605	0.984961
uc001gkj.1	CACYBP	-0.13398	74	0.163734	0.685804	-0.78586	0.097	0.738204	1.47132	0.462497	0.314342	NA	NA	NA	NA	NA	NA
uc001gkk.3	MRPS14	0.0347618	68	0.72938	0.943956	0.137046	0.72	0.966562	0.538847	0.249209	0.462485	NA	NA	NA	NA	NA	NA
uc001gkl.1	TNN	0.101058	114	0.190208	0.70482	0.720771	0.282	0.84933	0.633857	0.355373	0.560651	0.0700377	0.303335	0.548179	18	0.443	0.971468
uc001gkn.3	KIAA0040	-0.0613332	88	0.485989	0.869402	-0.313373	0.481	0.912484	0.545857	0.284448	0.521103	0.0299484	0.659839	0.82193	18	0.778	0.994873
uc001gku.1	RFWD2	-0.0363016	73	0.707884	0.937777	-0.150038	0.747	0.971263	1.01454	0.275991	0.272036	0.00448126	0.958939	0.982378	11	0.962963	0.999167
uc001gkz.3	PAPPA2	-0.247588	115	0.00126567	0.283041	-2.89768	0.007	0.481133	4.31966	25.0895	5.80822	-0.0520015	0.0514005	0.199389	117	0.514	0.978299
uc001glc.3	ASTN1	0.188719	94	0.0266095	0.481534	1.57496	0.047	0.649558	0.650124	0.642538	0.98833	0.0145382	0.502969	0.718789	177	0.854	0.999167
uc001glf.3	FAM5B	0.0322825	96	0.701442	0.936053	0.154008	0.751	0.971413	0.214715	0.22625	1.05372	NA	NA	NA	NA	NA	NA
uc001gli.1	SEC16B	0.018052	116	0.813372	0.962101	0.0897108	0.806	0.976381	0.744336	0.197587	0.265454	0.0366825	0.287765	0.530812	70	0.675	0.98782
uc001gln.1	RASAL2-AS1	0.00636828	93	0.940683	0.984083	0.0265567	0.942	0.989869	0.477009	0.221137	0.463591	-0.0550424	0.216603	0.453223	42	0.292	0.966111
uc001glq.3	RASAL2	-0.0145254	90	0.867445	0.974346	-0.061758	0.899	0.988138	0.981798	0.221924	0.226039	-0.0848455	0.00380066	0.0371313	97	0.133	0.89671
uc001glt.2	TEX35	-0.0604072	97	0.470799	0.862516	-0.327164	0.447	0.905436	1.28626	0.274813	0.213653	-0.112041	0.068701	0.238728	22	0.316	0.971468
uc001glz.3	RALGPS2	-0.134932	66	0.186046	0.701394	-0.73038	0.23	0.833035	0.890059	0.617976	0.694309	-0.15489	0.0062232	0.0504111	26	0.072	0.879994
uc001gma.3	ANGPTL1	0.0756236	93	0.376891	0.819461	0.423784	0.526	0.926321	1.72666	0.389985	0.225862	-0.208674	0.0122785	0.0789193	12	0.126253	0.89294
uc001gmc.3	FAM20B	0.0143752	65	0.888837	0.978425	0.0511781	NA	NA	0.903182	0.259878	0.287736	-0.0204062	0.798825	0.901735	13	0.935	0.999167
uc001gmd.3	TOR3A	-0.128594	108	0.104879	0.627481	-0.97931	0.18	0.805747	1.57151	0.419272	0.266796	NA	NA	NA	NA	NA	NA
uc001gmi.4	ABL2	-0.0715578	101	0.383158	0.822083	-0.416623	0.393	0.885066	1.30415	0.274404	0.210408	-0.0400383	0.617028	0.796101	13	0.952	0.999167
uc001gml.3	SOAT1	0.0515318	102	0.527913	0.88265	0.277437	0.58	0.939039	0.406288	3.44787	8.48628	NA	NA	NA	NA	NA	NA
uc001gmo.3	AXDND1	-0.110757	106	0.166518	0.688646	-0.77854	0.263	0.848573	0.718118	0.205446	0.286089	NA	NA	NA	NA	NA	NA
uc001gmq.4	NPHS2	-0.129682	101	0.114001	0.63287	-0.943093	0.182	0.806022	0.0278536	0.453476	16.2807	NA	NA	NA	NA	NA	NA
uc001gnj.3	FAM163A	0.0940956	89	0.282351	0.763356	0.549211	0.315	0.859317	0.967759	0.391316	0.404353	-0.00483163	0.95188	0.979173	13	0.807	0.997213
uc001gnk.3	TOR1AIP2	-0.115236	107	0.148086	0.670681	-0.829486	0.152	0.790032	2.22384	0.538955	0.242354	-0.110823	0.124646	0.337526	16	0.226	0.944851
uc001gnp.2	TOR1AIP1	-0.094321	110	0.229902	0.734066	-0.638457	0.257	0.847081	2.49573	0.545823	0.218703	-0.0993676	0.214579	0.450803	13	0.285571	0.96537
uc001gnt.3	CEP350	-0.2348	120	0.00178393	0.295388	-2.74862	0.005	0.422541	1.62885	6.28801	3.86041	-0.165968	0.0147223	0.0891859	18	0.034	0.832569
uc001gnz.3	QSOX1	0.00342476	112	0.964908	0.991222	0.015514	0.968	0.995491	0.344244	0.200736	0.583119	-0.115687	0.0177522	0.10094	35	0.128	0.89294
uc001god.4	FLJ23867	-0.0136905	74	0.886841	0.978069	-0.0521542	NA	NA	0.984435	0.243134	0.246979	-0.0954586	0.0614147	0.222473	32	0.238	0.954427
uc001goe.2	LHX4	-0.00867296	56	0.937763	0.983664	-0.027907	0.945	0.989869	0.910062	0.285092	0.313267	-0.0826735	0.0547299	0.207003	45	0.259	0.959755
uc001gog.3	ACBD6	-0.00987113	90	0.909694	0.979867	-0.0411048	0.913	0.988138	0.827072	0.222501	0.269023	-0.0611407	0.0495472	0.195043	86	0.248	0.959755
uc001goi.3	XPR1	-0.131568	83	0.146933	0.669896	-0.832882	0.159	0.793077	1.04945	0.384306	0.366197	-0.0748733	0.0395459	0.170221	63	0.289	0.966111
uc001gok.2	KIAA1614	-0.135049	109	0.0870707	0.605171	-1.06013	0.078	0.705834	0.613901	0.782322	1.27435	-0.111482	0.0700949	0.241877	22	0.219	0.940463
uc001goq.2	MR1	0.0534582	102	0.512603	0.877828	0.290219	0.607	0.944297	0.5991	0.236676	0.395052	-0.00206527	0.963912	0.983372	40	0.76	0.993422
uc001got.4	IER5	0.021487	65	0.834505	0.966593	0.0785712	NA	NA	0.392918	0.40203	1.02319	0.00829229	0.863169	0.936476	36	0.807	0.997213
uc001goz.3	ZNF648	0.117749	85	0.18884	0.704003	0.723905	0.159	0.793077	1.29751	0.321416	0.247718	-0.0173506	0.828439	0.916382	13	0.767839	0.994466
uc001gpa.2	GLUL	-0.124128	60	0.246818	0.744678	-0.607624	NA	NA	0.4548	0.39823	0.875617	-0.106909	0.116138	0.324892	18	0.133	0.89671
uc001gpe.3	TEDDM1	-0.0723889	105	0.368194	0.814728	-0.433924	0.369	0.879424	1.31817	0.273594	0.207556	-0.0961459	0.197086	0.43085	15	0.135	0.89671
uc001gpl.4	RGS16	0.141039	97	0.0922179	0.611545	1.03518	0.07	0.688207	1.56496	0.754528	0.482138	-0.0468605	0.45696	0.68421	21	0.596	0.984337
uc001gpm.1	RGS8	0.0499252	60	0.641357	0.920493	0.1929	0.632	0.950212	0.96941	0.262409	0.270689	-0.090904	0.0748712	0.2516	32	0.464	0.971468
uc001gpr.3	DHX9	0.017813	100	0.828993	0.965066	0.0814491	0.873	0.98619	0.827382	0.212932	0.257356	-0.141672	0.103598	0.305024	11	0.537613	0.980846
uc001gpu.3	SHCBP1L	0.102263	94	0.229572	0.734005	0.63908	0.312	0.858861	1.72994	0.374953	0.216744	-0.0869209	0.189374	0.421644	19	0.368	0.971468
uc001gpy.4	LAMC1	0.0935383	110	0.233792	0.738511	0.63117	0.398	0.887537	1.76411	0.393088	0.222825	-0.114635	0.0143742	0.08777	38	0.117	0.89294
uc001gqa.2	LAMC2	0.0953244	113	0.218654	0.726086	0.660242	0.28	0.84933	1.54738	0.366916	0.237121	-0.127711	0.0338699	0.15604	23	0.095	0.89294
uc001gqc.2	NMNAT2	0.127619	50	0.278664	0.762474	0.554919	NA	NA	0.828832	0.288748	0.34838	-0.0793325	0.161145	0.387484	26	0.391	0.971468
uc001gqf.3	SMG7	-0.0269556	110	0.73151	0.944379	-0.13578	0.73	0.96847	0.483336	0.22919	0.474183	-0.0814353	0.244791	0.487285	17	0.376	0.971468
uc001gqk.4	NCF2	0.0858693	104	0.288125	0.768332	0.540419	0.377	0.881848	0.928534	0.242053	0.260683	-0.0789218	0.306347	0.551581	14	0.461	0.971468
uc001gqm.3	RGL1	-0.0410148	94	0.629899	0.918606	-0.200729	0.635	0.951761	0.708236	0.245444	0.346557	-0.132196	0.000684097	0.0113687	55	0.044	0.850463
uc001gqn.3	APOBEC4	-0.00579963	109	0.941423	0.984417	-0.026215	0.954	0.991839	0.922762	0.202999	0.219991	-0.109525	0.171333	0.399867	13	0.314314	0.971468
uc001gqr.3	COLGALT2	-0.099157	94	0.244033	0.742877	-0.612551	0.174	0.800229	1.39748	0.303235	0.216987	-0.104385	0.0440929	0.18109	31	0.114	0.89294
uc001gqt.4	TSEN15	-0.106192	69	0.286969	0.766848	-0.542165	0.317	0.859317	1.62994	0.40855	0.250653	-0.147967	0.0551328	0.207749	14	0.046	0.851229
uc001gqv.1	C1orf21	NA	NA	NA	NA	NA	NA	NA	NA	0.411197	NA	-0.024189	0.620107	0.797521	35	0.779	0.994873
uc001gra.4	FAM129A	-0.140682	118	0.0634747	0.558828	-1.1974	0.12	0.768766	1.65414	0.539733	0.326291	-0.0608087	0.371496	0.613452	18	0.371	0.971468
uc001grc.1	RNF2	0.208514	24	0.230139	0.734066	0.638009	NA	NA	1.01062	0.377434	0.373467	-0.154586	0.0635978	0.227257	12	0.112112	0.89294
uc001grf.4	TRMT1L	0.0811124	104	0.315669	0.786928	0.500769	0.355	0.876072	1.01981	0.221306	0.217007	NA	NA	NA	NA	NA	NA
uc001grg.4	SWT1	-0.201908	113	0.00917355	0.407028	-2.03746	0.01	0.507049	6.99679	2.0054	0.286617	-0.231913	0.0110716	0.0738971	10	0.0281974	0.824991
uc001grl.3	IVNS1ABP	0.0218093	81	0.812309	0.961947	0.0902786	0.79	0.975675	1.009	0.233687	0.231603	NA	NA	NA	NA	NA	NA
uc001grq.1	HMCN1	0.148454	121	0.0473073	0.531837	1.32507	0.213	0.827442	1.03078	0.230411	0.22353	0.0138793	0.716636	0.85785	57	0.945	0.999167
uc001gru.4	PRG4	0.227135	96	0.00698879	0.373495	2.1556	0.117	0.76314	0.615487	1.56188	2.53764	NA	NA	NA	NA	NA	NA
uc001grv.3	TPR	-0.0269954	109	0.732329	0.944419	-0.135294	0.738	0.969601	0.789511	0.21847	0.276715	-0.0581175	0.485555	0.705339	12	0.287575	0.966111
uc001gry.3	OCLM	-0.0332955	55	0.766488	0.952152	-0.115495	NA	NA	0.200889	0.300152	1.49412	-0.205966	0.0179657	0.101759	11	0.012	0.782772
uc001gsa.4	PDC	0.0735759	91	0.395205	0.82715	0.403177	0.439	0.903291	1.66056	0.381301	0.229622	-0.24029	0.00268958	0.0294738	13	0.001	0.419228
uc001gsb.3	PTGS2	-0.0173058	106	0.828856	0.965066	-0.0815208	0.831	0.980259	0.320035	0.232934	0.727839	-0.0811915	0.350923	0.59315	11	0.190716	0.924073
uc001gsc.3	PLA2G4A	0.0469403	98	0.573201	0.901885	0.241693	0.548	0.929664	0.912225	0.212755	0.233226	0.0801738	0.17366	0.402829	24	0.155	0.90469
uc001gse.1	FAM5C	0.0148243	80	0.872586	0.975307	0.0591919	0.886	0.987199	0.962748	0.233568	0.242606	NA	NA	NA	NA	NA	NA
uc001gsg.3	RGS18	0.00864908	98	0.917328	0.980692	0.0374753	0.91	0.988138	0.562909	0.213	0.378392	0.0446219	0.381922	0.621257	32	0.612	0.984961
uc001gsh.3	RGS21	0.196332	80	0.0336712	0.506262	1.47274	0.016	0.558555	1.84077	3.50159	1.90224	0.0444751	0.312396	0.557504	43	0.462	0.971468
uc001gsi.1	RGS1	-0.0209239	92	0.807895	0.960653	-0.092645	0.78	0.973977	0.551024	0.221513	0.402003	0.0229527	0.79201	0.898106	11	0.715863	0.98985
uc001gsk.3	RGS13	0.10727	86	0.228485	0.733275	0.641142	0.264	0.848573	7.82802	1.99633	0.255023	-0.0143839	0.862963	0.936476	12	0.834337	0.997631
uc001gsl.3	RGS2	-0.0272134	79	0.769895	0.952926	-0.113568	0.794	0.975675	0.737622	0.240113	0.325523	NA	NA	NA	NA	NA	NA
uc001gsm.3	UCHL5	-0.152934	40	0.24794	0.745068	-0.605653	NA	NA	1.63766	0.53753	0.32823	NA	NA	NA	NA	NA	NA
uc001gss.3	TROVE2	-0.0860305	90	0.322889	0.790819	-0.490947	0.353	0.875517	2.05146	0.477364	0.232695	NA	NA	NA	NA	NA	NA
uc001gsz.2	GLRX2	0.0225992	89	0.796253	0.958735	0.0989487	0.802	0.975675	1.06269	0.240487	0.2263	NA	NA	NA	NA	NA	NA
uc001gtb.3	CDC73	-0.159256	24	0.359397	0.811848	-0.444426	NA	NA	NA	0.436616	NA	0.112718	0.0976095	0.294822	18	0.198	0.925324
uc001gtc.4	B3GALT2	0.00849219	71	0.931138	0.983038	0.0309858	0.929	0.989275	0.687377	0.244814	0.356157	NA	NA	NA	NA	NA	NA
uc001gtd.1	KCNT2	-0.019558	91	0.821198	0.964011	-0.0855522	0.866	0.984178	1.15244	0.26424	0.229286	0.0078953	0.884935	0.947171	28	0.745	0.9911
uc001gtj.4	CFH	-0.0588211	103	0.469023	0.861427	-0.328806	0.502	0.91864	1.19551	0.267717	0.223935	NA	NA	NA	NA	NA	NA
uc001gtl.3	CFHR3	0.0147127	59	0.891756	0.978669	0.049754	NA	NA	0.729811	0.29505	0.404283	NA	NA	NA	NA	NA	NA
uc001gtq.1	CFHR2	0.141754	59	0.189816	0.70482	0.721668	NA	NA	NA	0.567536	NA	NA	NA	NA	NA	NA	NA
uc001gts.4	CFHR5	0.0626983	77	0.505967	0.877292	0.295878	0.518	0.924402	0.645663	0.298533	0.462367	NA	NA	NA	NA	NA	NA
uc001gtt.1	F13B	-0.121595	113	0.116619	0.637071	-0.933229	0.106	0.749561	1.11847	0.465261	0.41598	NA	NA	NA	NA	NA	NA
uc001gtu.3	ASPM	-0.0890661	117	0.242052	0.741296	-0.616092	0.373	0.881364	1.4882	0.394065	0.264793	NA	NA	NA	NA	NA	NA
uc001gtx.1	ZBTB41	-0.0273859	101	0.738561	0.946069	-0.131614	0.752	0.971562	0.684604	0.253079	0.369672	NA	NA	NA	NA	NA	NA
uc001gtz.3	CRB1	-0.0162073	111	0.835811	0.96688	-0.077892	0.824	0.978737	0.281401	0.253896	0.902255	-0.0421991	0.380465	0.620068	36	0.926	0.999167
uc001guh.3	C1orf53	-0.0952307	61	0.370187	0.815654	-0.431579	NA	NA	0.908828	0.308975	0.339971	-0.0349281	0.487041	0.706161	33	0.901	0.999167
uc001guk.1	LHX9	-0.00681747	51	0.953374	0.988561	-0.0207368	NA	NA	1.08781	0.324214	0.298044	-0.0457655	0.334906	0.57845	37	0.787	0.995716
uc001gun.4	NEK7	-0.111055	43	0.383538	0.822083	-0.416191	NA	NA	0.788865	0.411754	0.521958	0.0976793	0.0167365	0.0972318	50	0.292	0.966111
uc001gup.3	ATP6V1G3	0.123162	86	0.166763	0.688646	0.7779	0.154	0.792022	1.18244	0.266623	0.225485	0.0456475	0.514428	0.726552	17	0.736	0.990245
uc001gur.2	PTPRC	-0.00300234	113	0.969095	0.99197	-0.0136338	0.987	0.999081	1.02467	0.212163	0.207056	-0.00569763	0.926244	0.967307	22	0.965	0.999167
uc001gvb.4	NR5A2	0.0122782	78	0.895682	0.978669	0.0478459	0.926	0.989275	0.913878	0.262595	0.287342	0.0688974	0.032808	0.152638	80	0.307	0.971468
uc001gve.3	ZNF281	0	91	1	1	0	1	1	1.09483	0.2408	0.219944	0.0544747	0.278377	0.52222	33	0.322	0.971468
uc001gvk.3	CAMSAP2	0.0957001	111	0.221031	0.728768	0.655546	0.299	0.85472	1.15127	0.240156	0.2086	NA	NA	NA	NA	NA	NA
uc001gvn.2	GPR25	0.00977336	74	0.919085	0.981334	0.0366444	NA	NA	0.872659	0.245096	0.280861	NA	NA	NA	NA	NA	NA
uc001gvo.4	C1orf106	0.0985555	95	0.244355	0.742877	0.611979	0.398	0.887537	0.959616	0.254288	0.264989	NA	NA	NA	NA	NA	NA
uc001gvs.2	KIF21B	0.123111	102	0.131571	0.651669	0.88084	0.21	0.825324	0.601052	0.427489	0.711234	-0.0573573	0.509914	0.723838	11	0.91483	0.999167
uc001gvv.3	CACNA1S	0.105279	110	0.180213	0.698645	0.744215	0.215	0.82752	1.63019	0.383992	0.235551	-0.0560355	0.452186	0.680474	15	0.859	0.999167
uc001gvy.3	TMEM9	0.0639559	75	0.50326	0.875998	0.298208	0.566	0.937273	1.04497	0.249663	0.23892	NA	NA	NA	NA	NA	NA
uc001gwc.3	IGFN1	0.176668	99	0.0330691	0.505457	1.48058	0.098	0.738204	0.907854	0.78764	0.867585	0.102889	0.182346	0.412869	14	0.47	0.971468
uc001gwd.3	PKP1	0.323323	100	8.83736e-05	0.179321	4.05368	0	0	5.57367	2669.04	478.866	0.11671	0.179963	0.410381	11	0.344	0.971468
uc001gwf.4	TNNT2	0.0178371	83	0.844108	0.969317	0.0736022	0.847	0.982807	0.0436469	0.34409	7.88349	0.119278	0.109545	0.314772	15	0.306	0.971468
uc001gwm.3	LAD1	0.000402744	108	0.995948	1	0.00176347	0.999	1	0.771125	0.205645	0.266682	0.057913	0.469486	0.693749	13	0.445	0.971468
uc001gwu.3	NAV1	0.108013	105	0.179367	0.696985	0.746257	0.265	0.848573	0.940686	0.314926	0.334784	0.0274369	0.5632	0.761643	37	0.674	0.98782
uc001gwz.3	IPO9	0.0934309	85	0.297113	0.77597	0.527078	0.375	0.881364	1.15502	0.327134	0.283229	0.0782516	0.20359	0.438062	22	0.501	0.977324
uc001gxa.3	SHISA4	0.168208	68	0.0941267	0.613128	1.02629	0.18	0.805747	1.7352	0.45167	0.260298	0.0689925	0.407731	0.644202	12	0.560682	0.98175
uc001gxc.3	TIMM17A	0.153278	54	0.175677	0.695811	0.755285	NA	NA	0.459519	0.428713	0.932961	NA	NA	NA	NA	NA	NA
uc001gxd.3	RNPEP	0.0653073	101	0.42608	0.839317	0.370509	0.459	0.909126	3.02532	0.664548	0.219662	0.242492	0.00361616	0.0358735	12	0.0853414	0.89294
uc001gxh.4	ELF3	-0.150052	97	0.0732276	0.580777	-1.13533	0.071	0.694068	2.0942	0.74917	0.357735	0.302432	0.000158549	0.00414231	13	0.0250501	0.805308
uc001gxj.3	GPR37L1	0.0748032	91	0.387369	0.823786	0.411875	0.538	0.927524	0.99793	0.221353	0.221812	0.168893	0.00344254	0.0348142	25	0.153	0.90469
uc001gxk.2	ARL8A	NA	NA	NA	NA	NA	NA	NA	0.994597	0.541468	0.54441	0.182885	0.00123682	0.0174737	26	0.129	0.89294
uc001gxs.3	PTPRVP	0.0446618	83	0.622461	0.916487	0.205888	0.631	0.950186	0.219346	0.260176	1.18614	0.197088	4.20084e-05	0.0015496	36	0.109	0.89294
uc001gxu.3	LGR6	0.191417	101	0.019656	0.46207	1.7065	0.053	0.659409	2.86578	0.999646	0.348821	0.191004	1.83444e-06	0.000159844	52	0.083	0.89294
uc001gxx.4	UBE2T	-0.102263	94	0.229572	0.734005	-0.63908	0.248	0.839606	0.954295	0.403488	0.422812	0.213778	4.99304e-05	0.00176998	30	0.064	0.867588
uc001gya.2	PPP1R12B	0.0404931	109	0.60792	0.911316	0.216153	0.671	0.955853	1.13728	0.23124	0.203327	0.171883	8.37773e-06	0.000484329	56	0.109	0.89294
uc001gyf.3	KDM5B	0.0344181	106	0.667253	0.927161	0.175709	0.658	0.955311	0.988851	0.205509	0.207826	0.0823852	0.180717	0.410926	22	0.298	0.967325
uc001gyj.3	BC049825	0.100047	59	0.354777	0.809832	0.450044	NA	NA	1.07225	0.337273	0.314547	NA	NA	NA	NA	NA	NA
uc001gyl.3	RABIF	0.102084	53	0.371754	0.816962	0.429744	0.36	0.876431	1.04673	0.298414	0.285091	NA	NA	NA	NA	NA	NA
uc001gyo.1	KLHL12	0.102667	53	0.369028	0.815167	0.432941	0.411	0.893004	0.885118	0.284282	0.321179	NA	NA	NA	NA	NA	NA
uc001gyq.5	ADIPOR1	0.032893	70	0.739684	0.946309	0.130954	0.746	0.970955	0.570913	0.320766	0.561848	NA	NA	NA	NA	NA	NA
uc001gyt.2	CYB5R1	0.0244665	93	0.774968	0.954459	0.110716	0.823	0.978226	1.0088	0.226049	0.224077	NA	NA	NA	NA	NA	NA
uc001gyu.1	TMEM183A	-0.0016399	75	0.986306	0.997262	-0.00598818	0.983	0.998299	0.702542	0.245697	0.349726	-0.106061	0.10928	0.314367	19	0.617	0.984961
uc001gzd.4	MYOG	-0.0853265	71	0.385261	0.822534	-0.414245	0.466	0.909592	0.876272	0.32496	0.370844	-0.117921	0.0337979	0.155797	27	0.488	0.97649
uc001gzf.1	ADORA1	0.183305	89	0.0362351	0.511258	1.44087	0.032	0.6186	2.27819	0.5183	0.227505	-0.0892124	0.115087	0.323036	26	0.641	0.985384
uc001gzh.1	MYBPH	0.0255821	107	0.748149	0.948182	0.126012	0.793	0.975675	0.813981	0.208211	0.255794	-0.119704	0.0517883	0.200246	22	0.469	0.971468
uc001gzi.2	CHI3L1	0.0535649	108	0.499367	0.874008	0.301581	0.534	0.927524	0.406813	0.230843	0.567442	-0.151613	0.0188395	0.104794	20	0.28	0.962858
uc001gzn.2	CHIT1	0.188719	94	0.0266095	0.481534	1.57496	0.081	0.710934	0.863246	0.845586	0.979542	0.0197112	0.772057	0.887574	18	0.852	0.999167
uc001gzq.3	BTG2	-0.0302687	55	0.78718	0.957449	-0.103926	NA	NA	0.688332	0.292475	0.424904	0.0557307	0.454649	0.682334	15	0.544	0.980846
uc001gzr.3	FMOD	-0.00849018	91	0.921845	0.981379	-0.0353419	0.911	0.988138	0.80557	0.244387	0.303371	0.00629656	0.932679	0.97129	15	0.868	0.999167
uc001gzt.3	PRELP	0.0227565	96	0.78697	0.957449	0.104042	0.813	0.976661	0.860793	0.214639	0.24935	-0.0216141	0.795355	0.89998	12	0.836837	0.997995
uc001gzu.1	OPTC	0.0497646	94	0.558771	0.895377	0.252766	0.614	0.946618	1.00464	0.221942	0.220916	-0.0298578	0.709211	0.853197	13	0.769	0.994868
uc001gzw.3	ATP2B4	-0.280481	111	0.000334854	0.252855	-3.47514	0.003	0.34114	41.0058	46.7076	1.13905	-0.109246	0.0584766	0.215511	25	0.262	0.959755
uc001haa.3	LAX1	-0.22081	112	0.00455986	0.347587	-2.34105	0.001	0.200844	3.8867	4.55346	1.17155	-0.199546	0.00742567	0.0563833	15	0.049	0.853977
uc001hac.3	ZC3H11A	-0.045274	112	0.560835	0.895377	-0.251165	0.572	0.938566	1.02604	0.209848	0.204522	NA	NA	NA	NA	NA	NA
uc001hai.3	SNRPE	NA	NA	NA	NA	NA	NA	NA	NA	NA	NA	NA	NA	NA	NA	NA	NA
uc001ham.3	SOX13	-0.0164405	106	0.837291	0.967339	-0.0771238	0.833	0.980392	0.501178	0.213595	0.426187	-0.0622121	0.237868	0.478467	30	0.593	0.983716
uc001hao.4	ETNK2	-0.0380592	94	0.65477	0.92318	-0.183911	0.654	0.95481	0.111146	0.234865	2.11312	-0.0513621	0.403997	0.641114	22	0.633	0.985384
uc001haq.2	REN	-0.030296	100	0.713353	0.939578	-0.146695	0.728	0.967559	1.1689	0.24759	0.211814	-0.0123818	0.855607	0.932288	18	0.923	0.999167
uc001har.3	KISS1	-0.128124	85	0.152775	0.674714	-0.815948	0.14	0.784457	1.69897	0.440899	0.25951	-0.127017	0.127465	0.341164	12	0.332	0.971468
uc001has.1	GOLT1A	0.133238	83	0.141872	0.663108	0.848103	0.135	0.781645	0.396479	0.371835	0.937841	-0.121864	0.0817682	0.2658	17	0.341	0.971468
uc001hau.4	PLEKHA6	0.0524226	112	0.500671	0.87474	0.300448	0.523	0.926321	1.04177	0.224218	0.215228	-0.0293461	0.571409	0.767209	31	0.786	0.995686
uc001hav.4	PPP1R15B	0.0269954	109	0.732329	0.944419	0.135294	0.776	0.973374	1.01812	0.210058	0.206319	-0.0331408	0.550837	0.751607	27	0.914	0.999167
uc001haw.3	PIK3C2B	0.0878185	113	0.257107	0.751278	0.589886	0.29	0.85091	1.64854	0.352045	0.21355	-0.00699397	0.897994	0.952848	28	0.912	0.999167
uc001hba.3	MDM4	-0.133606	100	0.105222	0.627481	-0.977893	0.128	0.774157	1.04749	0.456069	0.435391	0.0120416	0.819287	0.911827	30	1	1
uc001hbf.1	LRRN2	0.00744194	108	0.92523	0.981605	0.0337501	0.945	0.989869	0.838588	0.204185	0.243487	0.0814239	0.050699	0.19763	48	0.382	0.971468
uc001hbj.3	NFASC	0.141108	97	0.0920587	0.610858	1.03594	0.171	0.798465	1.88479	0.5482	0.290855	0.00350067	0.930322	0.969662	52	0.802	0.996958
uc001hbr.3	CNTN2	-0.0650514	111	0.405487	0.8313	-0.392023	0.434	0.902626	0.887256	0.253128	0.285293	-0.08589	0.153621	0.378419	23	0.667	0.98782
uc001hbt.3	TMEM81	-0.112741	100	0.17161	0.691182	-0.765457	0.205	0.819205	1.3613	0.534402	0.392567	-0.103796	0.107846	0.31202	20	0.465	0.971468
uc001hbu.2	RBBP5	0.0325735	34	0.821297	0.964011	0.0854997	NA	NA	0.409261	0.392719	0.95958	-0.118397	0.0543973	0.20622	22	0.285	0.965228
uc001hbw.3	DSTYK	0.0398717	108	0.615101	0.9134	0.211054	0.624	0.949006	1.01361	0.216422	0.213516	-0.0432578	0.4629	0.688484	24	0.572	0.982174
uc001hce.3	NUAK2	0.0228837	107	0.773949	0.954459	0.111288	0.791	0.975675	1.00747	0.207648	0.206108	0.0202253	0.67423	0.830868	36	0.926	0.999167
uc001hcj.2	LEMD1	-0.0953971	97	0.254741	0.750272	-0.593901	0.287	0.85091	0.922606	0.402037	0.435762	-0.0203818	0.621171	0.79822	49	0.646	0.985384
uc001hco.2	AK095633	0.067004	43	0.599062	0.90945	0.222528	NA	NA	1.11379	0.339963	0.30523	NA	NA	NA	NA	NA	NA
uc001hcr.3	CDK18	-0.0471974	104	0.559319	0.895377	-0.252341	0.575	0.939039	0.759601	0.244557	0.321955	-0.0297996	0.5532	0.753748	33	0.637	0.985384
uc001hcv.4	MFSD4	-0.0464876	103	0.567153	0.898031	-0.246299	0.617	0.946618	0.937176	0.239691	0.255759	0.0283868	0.596442	0.784485	29	0.511	0.977493
uc001hda.1	SLC45A3	0.122114	104	0.130888	0.650462	0.883101	0.121	0.771338	2.05622	0.568314	0.276387	-0.0171524	0.736796	0.867834	32	0.864	0.999167
uc001hdb.3	NUCKS1	0.0160315	54	0.887367	0.97816	0.0518965	NA	NA	0.828162	0.277545	0.335134	-0.0666765	0.121308	0.33285	45	0.402	0.971468
uc001hde.4	RAB7L1	0.0531652	64	0.608067	0.911316	0.216048	NA	NA	0.860162	0.260318	0.302638	NA	NA	NA	NA	NA	NA
uc001hdh.1	SLC41A1	0.0708027	74	0.461768	0.858248	0.335577	0.485	0.913132	1.0325	0.24951	0.241657	-0.195658	0.000335401	0.00700344	28	0.005	0.694488
uc001hdj.3	PM20D1	0.0519035	117	0.495399	0.872196	0.305045	0.541	0.927524	0.334182	0.201703	0.603573	-0.135936	0.00874901	0.0629898	31	0.088	0.89294
uc001hdp.3	SLC26A9	0.0594626	115	0.438804	0.84533	0.35773	0.426	0.897682	0.966849	0.227042	0.234827	-0.0660207	0.294634	0.538676	21	0.43	0.971468
uc001hdr.4	FAM72A	0.0429916	69	0.666409	0.926628	0.176259	NA	NA	0.871029	0.26922	0.309083	0.0335415	0.38041	0.620065	57	0.661	0.98782
uc001hds.2	AVPR1B	0.151462	110	0.0538611	0.539072	1.26872	0.098	0.738204	2.53098	1.27442	0.503529	-0.0482571	0.403266	0.640837	25	0.21	0.931671
uc001hdt.2	C1orf186	0.0215999	86	0.808399	0.960653	0.0923741	0.797	0.975675	0.98376	0.225917	0.229646	-0.0986319	0.236588	0.476666	12	0.259519	0.959755
uc001hdu.3	CTSE	0.0301992	86	0.734586	0.944807	0.133957	0.73	0.96847	1.00781	0.227187	0.225426	NA	NA	NA	NA	NA	NA
uc001hdy.3	SRGAP2	0.0689998	88	0.433164	0.84182	0.363348	0.481	0.912484	0.563272	0.331021	0.587676	0.0197412	0.553741	0.753978	75	0.723	0.990245
uc001hdz.2	IKBKE	-0.103738	110	0.186674	0.70249	-0.728917	0.198	0.815031	1.07126	0.361089	0.33707	-0.00357321	0.93026	0.969662	50	0.887	0.999167
uc001hed.3	RASSF5	0.165682	83	0.0677702	0.569091	1.16896	0.095	0.73422	2.74199	0.798569	0.291237	0.0162917	0.742113	0.871202	34	0.523	0.980846
uc001heh.2	EIF2D	0.112679	111	0.149609	0.671522	0.825043	0.175	0.800229	1.16027	0.384732	0.331587	-0.164621	0.0225491	0.118346	16	0.031	0.828045
uc001hej.3	DYRK3	0.115271	97	0.168765	0.689774	0.772717	0.157	0.793077	1.55884	0.370163	0.237461	-0.169847	0.0415382	0.175149	12	0.024024	0.788781
uc001hem.2	MAPKAPK2	-0.0561951	57	0.609647	0.911505	-0.214922	NA	NA	0.749371	0.331973	0.443002	-0.0818952	0.140469	0.359888	27	0.229	0.947575
uc001hen.1	IL10	0.0769816	100	0.350589	0.806718	0.455201	0.348	0.874666	1.18596	0.253856	0.214051	-0.0784381	0.183161	0.413755	24	0.266	0.959755
uc001heo.3	IL19	0.106257	105	0.186544	0.702181	0.72922	0.125	0.772941	1.62207	0.336858	0.207672	-0.0560443	0.397429	0.636202	19	0.443	0.971468
uc001her.3	IL20	0.131206	103	0.106288	0.628347	0.973515	0.113	0.756657	0.4775	0.627921	1.31502	-0.0680623	0.345644	0.588485	16	0.44	0.971468
uc001heu.2	IL24	-0.106732	97	0.20258	0.71824	-0.693404	0.152	0.790032	0.583536	0.529271	0.907006	NA	NA	NA	NA	NA	NA
uc001hey.3	FAIM3	-0.120236	107	0.131279	0.651366	-0.881806	0.132	0.776485	0.672636	0.854427	1.27027	NA	NA	NA	NA	NA	NA
uc001hez.3	PIGR	0.0597246	117	0.432761	0.841591	0.363752	0.47	0.909592	0.977456	0.2122	0.217094	NA	NA	NA	NA	NA	NA
uc001hfa.4	FCAMR	-0.179229	112	0.0213113	0.469285	-1.67139	0.034	0.620791	0.718513	2.05896	2.86558	NA	NA	NA	NA	NA	NA
uc001hfd.2	C1orf116	0.154549	114	0.0451406	0.527728	1.34543	0.068	0.687333	1.08059	0.427124	0.395271	NA	NA	NA	NA	NA	NA
uc001hfe.1	YOD1	0.0420914	95	0.619049	0.915284	0.208275	0.658	0.955311	1.0698	0.241389	0.225638	NA	NA	NA	NA	NA	NA
uc001hfg.3	PFKFB2	-0.105946	86	0.234281	0.738982	-0.630262	0.25	0.841221	1.15281	0.311392	0.270116	NA	NA	NA	NA	NA	NA
uc001hfj.3	C4BPB	-0.133276	101	0.104317	0.626372	-0.981643	0.124	0.772938	0.376677	0.595575	1.58113	NA	NA	NA	NA	NA	NA
uc001hfo.3	C4BPA	0.0385649	106	0.630006	0.918606	0.200655	0.587	0.939686	0.992679	0.20636	0.207882	NA	NA	NA	NA	NA	NA
uc001hfr.4	CD55	-0.15967	99	0.0540807	0.539072	-1.26696	0.058	0.665408	0.267809	0.955615	3.56827	NA	NA	NA	NA	NA	NA
uc001hfv.3	CR2	-0.116538	111	0.136156	0.657192	-0.865964	0.116	0.760466	0.0864629	0.576889	6.6721	NA	NA	NA	NA	NA	NA
uc001hfx.3	CR1	-0.104902	81	0.253406	0.749271	-0.596183	NA	NA	1.57605	0.368538	0.233836	NA	NA	NA	NA	NA	NA
uc001hga.4	CR1L	0.0236472	76	0.803219	0.959409	0.0951659	NA	NA	0.938711	0.238686	0.25427	NA	NA	NA	NA	NA	NA
uc001hgj.3	CD46	0.156468	98	0.0604071	0.55143	1.21891	0.151	0.790032	0.00350921	0.893178	254.524	0.0190631	0.691961	0.841291	36	0.941	0.999167
uc001hgw.1	CD34	0.0510052	106	0.524052	0.881287	0.280626	0.586	0.939686	1.08651	0.251383	0.231367	0.074124	0.0505432	0.19723	58	0.325	0.971468
uc001hgz.3	PLXNA2	0.114356	97	0.172173	0.692053	0.764034	0.203	0.817764	2.71927	0.774236	0.284722	0.192499	2.53358e-20	2.14954e-17	192	0.003	0.66785
uc001hhd.3	CAMK1G	-0.0208648	91	0.809473	0.960879	-0.0917976	0.823	0.978226	0.734999	0.219887	0.299167	0.168833	0.000374655	0.00758723	37	0.018	0.788781
uc001hhh.3	LAMB3	0.202977	111	0.00944206	0.412721	2.02493	0.026	0.593929	9.84245	2.64878	0.269118	0.167072	0.000885753	0.013716	33	0.027	0.811364
uc001hhi.4	G0S2	0.176691	83	0.0514275	0.533702	1.2888	0.052	0.655938	2.64611	0.670522	0.2534	0.122657	0.0798	0.261977	17	0.0550551	0.863874
uc001hhk.3	HSD11B1	-0.150398	91	0.0822217	0.597142	-1.08501	0.121	0.771338	1.71839	0.750372	0.436671	0.133824	0.0296829	0.143432	22	0.047047	0.851229
uc001hho.3	TRAF3IP3	0.0429162	101	0.600952	0.90945	0.22116	0.635	0.951761	1.06034	0.223757	0.211023	0.0697464	0.236576	0.476666	24	0.265	0.959755
uc001hhp.1	C1orf74	-0.0473567	98	0.569804	0.89899	-0.244275	0.592	0.940064	1.14198	0.243135	0.212905	0.0688055	0.24296	0.484837	24	0.263	0.959755
uc001hhq.2	IRF6	0.0142638	64	0.890565	0.978669	0.0503345	NA	NA	0.175653	0.257411	1.46545	0.0742754	0.181256	0.411703	27	0.237	0.953977
uc001hhr.2	DIEXF	0.023925	111	0.759645	0.951568	0.11939	0.741	0.970574	0.94557	0.34954	0.36966	0.0960396	0.0962356	0.29237	25	0.286	0.96537
uc001hhs.5	SYT14	0.16656	83	0.0663266	0.565275	1.17831	0.08	0.710218	31.1209	7.3507	0.236198	0.0450291	0.191922	0.424784	70	0.809	0.997631
uc001hhx.4	SERTAD4-AS1	-0.0886439	39	0.508723	0.877828	-0.293519	NA	NA	1.25317	0.394217	0.314576	0.0769054	0.0443099	0.181696	57	0.462	0.971468
uc001hhy.3	SERTAD4	-0.0420724	89	0.630743	0.918606	-0.200148	0.735	0.9692	0.89839	0.245982	0.273803	0.0769054	0.0443099	0.181696	57	0.462	0.971468
uc001hib.2	KCNH1	0.256401	83	0.00470385	0.349258	2.32755	0.003	0.34114	75.6492	24.3229	0.321522	0.158554	0.000371858	0.0075782	42	0.134	0.89671
uc001hii.3	TRAF5	0.100104	99	0.227195	0.733183	0.643601	0.24	0.835758	1.98392	0.42027	0.211839	NA	NA	NA	NA	NA	NA
uc001hin.2	RD3	0.115473	83	0.203015	0.718698	0.692471	0.192	0.810614	2.59551	0.597462	0.23019	NA	NA	NA	NA	NA	NA
uc001hio.1	SLC30A1	0.0188266	78	0.840662	0.968649	0.0753785	0.853	0.984011	0.302922	0.237904	0.785364	0.0467123	0.591493	0.782304	11	0.656535	0.98782
uc001hir.2	NEK2	-0.0393997	88	0.654476	0.92318	-0.184106	0.666	0.955853	0.927538	0.248581	0.268001	NA	NA	NA	NA	NA	NA
uc001hiv.3	LPGAT1	0.0389209	89	0.656554	0.924094	0.18273	0.695	0.961978	1.10307	0.259994	0.2357	NA	NA	NA	NA	NA	NA
uc001hiw.2	INTS7	0.18966	78	0.042831	0.523123	1.36824	0.079	0.706614	19.0668	5.63741	0.295666	NA	NA	NA	NA	NA	NA
uc001hjb.3	PPP2R5A	-0.195435	60	0.0682409	0.569985	-1.16595	NA	NA	1.74204	0.834683	0.479142	-0.0375797	0.515129	0.726817	25	0.609	0.984961
uc001hjd.3	NENF	0.16138	41	0.216805	0.724458	0.663931	NA	NA	0.302728	0.529829	1.75018	0.0651659	0.475324	0.698407	10	0.442675	0.971468
uc001hjk.3	FAM71A	0.0151359	98	0.855858	0.971256	0.0675985	0.841	0.982035	1.08257	0.23213	0.214425	0.0184072	0.749872	0.875049	25	0.676	0.98782
uc001hjl.2	BATF3	0.0234466	60	0.826839	0.964812	0.0825789	NA	NA	0.422899	0.264041	0.624359	-0.0660333	0.360213	0.602238	16	0.358	0.971468
uc001hjn.3	NSL1	0.00358755	98	0.965658	0.991351	0.0151768	0.96	0.993507	0.985342	0.214546	0.217738	NA	NA	NA	NA	NA	NA
uc001hjo.2	TATDN3	0.067864	90	0.435511	0.843102	0.361001	0.45	0.905799	0.933422	0.242475	0.25977	NA	NA	NA	NA	NA	NA
uc001hjq.3	C1orf227	-0.0432821	80	0.639612	0.920493	-0.194084	0.653	0.95481	0.717225	0.286332	0.399222	NA	NA	NA	NA	NA	NA
uc001hjt.3	FLVCR1	-0.128135	106	0.109477	0.63071	-0.960678	0.118	0.764824	2.11679	0.627705	0.296536	NA	NA	NA	NA	NA	NA
uc001hjw.3	VASH2	0.0149533	70	0.879934	0.976786	0.0555498	0.917	0.988365	0.930173	0.256935	0.276223	NA	NA	NA	NA	NA	NA
uc001hjz.3	ANGEL2	-0.0778479	93	0.363019	0.813272	-0.440071	0.405	0.88955	0.818976	0.369204	0.450811	NA	NA	NA	NA	NA	NA
uc001hkg.2	PROX1	0.0800904	65	0.436124	0.84382	0.36039	NA	NA	0.956615	0.254133	0.265659	0.0303891	0.230133	0.469232	130	0.953	0.999167
uc001hkk.2	PTPN14	0.0561547	104	0.487268	0.869687	0.312232	0.581	0.939686	1.57116	0.326883	0.208053	0.10997	0.00213371	0.0251981	65	0.226	0.944851
uc001hkm.3	CENPF	-0.0645766	110	0.41108	0.832417	-0.386074	0.468	0.909592	1.14811	0.260737	0.227101	0.131235	0.0329875	0.153333	22	0.338	0.971468
uc001hkr.4	KCNK2	0.0271139	59	0.80198	0.959409	0.0958362	NA	NA	0.348463	0.309213	0.887364	-0.117777	0.00271897	0.0296348	54	0.122	0.89294
uc001hks.3	KCTD3	0.0205416	98	0.805276	0.960265	0.0940552	0.858	0.984084	1.14435	0.245748	0.214749	0.224794	1.05874e-05	0.000570797	32	0.019	0.788781
uc001hku.1	USH2A	0.0457053	119	0.544827	0.888843	0.263741	0.646	0.953554	0.761469	0.195363	0.256561	0.0992323	3.40688e-08	6.10209e-06	258	0.234	0.953568
uc001hkw.2	ESRRG	0.374513	22	0.0398071	0.511764	1.40004	NA	NA	13.4231	5.30117	0.39493	0.123787	1.36026e-17	1.04416e-14	397	0.204	0.925868
uc001hlf.1	GPATCH2	-0.0313044	102	0.701397	0.936053	-0.154036	0.754	0.971623	0.773121	0.27255	0.352532	0.159553	1.15429e-07	1.5506e-05	92	0.087	0.89294
uc001hlh.1	SPATA17	-0.0784164	110	0.318202	0.787714	-0.497298	0.288	0.85091	1.04118	0.242736	0.233137	0.148669	2.71521e-06	0.000212472	83	0.175	0.919505
uc001hlj.3	RRP15	0.0714845	103	0.378885	0.819715	0.421493	0.357	0.876072	1.28279	0.266937	0.208091	0.173133	1.04886e-05	0.000570797	54	0.081	0.89294
uc001hln.3	TGFB2	-0.0555821	67	0.583037	0.9052	-0.234304	0.589	0.939686	1.16992	0.312523	0.267132	0.107606	0.00168636	0.0217473	71	0.213	0.934869
uc001hlq.4	LYPLAL1	-0.0435165	93	0.611119	0.912686	-0.213874	0.608	0.944902	0.953228	0.25692	0.269526	0.0479618	0.2058	0.440279	58	0.798	0.996958
uc001hlw.3	SLC30A10	0.136451	89	0.119004	0.642485	0.924438	0.184	0.808857	1.20736	0.268763	0.222603	NA	NA	NA	NA	NA	NA
uc001hly.1	EPRS	0.101507	120	0.176836	0.695811	0.752431	0.222	0.830411	2.97145	0.586736	0.197458	NA	NA	NA	NA	NA	NA
uc001hma.3	BPNT1	0.0800484	75	0.402145	0.829544	0.395617	0.422	0.897682	1.06492	0.332921	0.312624	NA	NA	NA	NA	NA	NA
uc001hmc.3	IARS2	-0.00730349	115	0.924241	0.981379	-0.0342148	0.909	0.988138	0.686808	0.200666	0.292172	NA	NA	NA	NA	NA	NA
uc001hmn.4	MARK1	0.217125	90	0.0125999	0.431228	1.89963	0.021	0.576847	4.20898	1.43857	0.341785	0.0784925	0.367167	0.609676	11	0.428571	0.971468
uc001hmp.1	C1orf115	-0.0541853	66	0.595399	0.908418	-0.225192	0.656	0.955204	0.0894972	0.252355	2.8197	NA	NA	NA	NA	NA	NA
uc001hmq.3	43892	0.0711307	105	0.376577	0.819461	0.424146	0.411	0.893004	0.741842	0.245254	0.330602	0.153427	0.0779498	0.258019	11	0.0940941	0.89294
uc001hms.3	43891	0.0113847	103	0.888547	0.978378	0.0513194	0.93	0.989275	0.621732	0.221332	0.355993	0.120392	0.106271	0.30914	15	0.124	0.89294
uc001hmv.4	HLX	-0.0320158	89	0.714526	0.940429	-0.145982	0.737	0.96944	1.01078	0.309302	0.306002	0.120805	0.0179257	0.101609	32	0.123	0.89294
uc001hmw.1	C1orf140	-0.145108	72	0.136959	0.658103	-0.863408	NA	NA	1.43568	0.65759	0.458033	0.108767	0.0114933	0.0758022	45	0.121	0.89294
uc001hmy.2	DUSP10	0.142759	91	0.0990101	0.618557	1.00432	0.177	0.8032	2.40096	0.57924	0.241253	-0.0156408	0.794992	0.899696	23	0.954	0.999167
uc001hnh.1	HHIPL2	0.113773	85	0.204209	0.720372	0.689924	0.282	0.84933	1.0406	0.248156	0.238474	NA	NA	NA	NA	NA	NA
uc001hnl.3	MIA3	-0.118684	105	0.140117	0.661461	-0.853509	0.206	0.820446	0.158474	0.279037	1.76078	0.106119	0.245049	0.487376	10	0.055668	0.863874
uc001hnn.3	AIDA	0.0442375	44	0.725356	0.942904	0.139449	NA	NA	0.959345	0.310393	0.323547	0.0913992	0.316725	0.560099	10	0.0587045	0.863874
uc001hnq.1	BROX	0.11377	94	0.181339	0.699122	0.741509	0.266	0.848573	1.87389	0.431972	0.230522	NA	NA	NA	NA	NA	NA
uc001hnt.3	FAM177B	0.102288	80	0.268472	0.756312	0.571101	0.29	0.85091	1.00871	0.359981	0.356873	0.19496	0.0327084	0.152519	10	0.00100604	0.419228
uc001hnu.2	DISP1	0.105965	115	0.167682	0.689253	0.775514	0.25	0.841221	1.02318	0.211971	0.20717	0.104031	0.083949	0.268984	23	0.33	0.971468
uc001hnw.2	TLR5	-0.0467424	115	0.542793	0.887568	-0.265366	0.577	0.939039	1.15474	0.228934	0.198256	NA	NA	NA	NA	NA	NA
uc001hny.4	SUSD4	0.0205394	101	0.80234	0.959409	0.0956414	0.814	0.976661	0.98855	0.216276	0.218781	0.155909	0.0219449	0.116004	18	0.281	0.963625
uc001hoa.2	C1orf65	0.11229	97	0.180053	0.69846	0.744599	0.142	0.785053	1.25518	0.27684	0.220558	NA	NA	NA	NA	NA	NA
uc001hob.4	CAPN2	0.0723894	103	0.37288	0.817831	0.428431	0.402	0.888768	0.958802	0.208128	0.217071	NA	NA	NA	NA	NA	NA
uc001hoh.3	FBXO28	-0.0901963	77	0.338648	0.798919	-0.470251	0.325	0.862114	0.709117	0.318653	0.449366	NA	NA	NA	NA	NA	NA
uc001hoj.3	DEGS1	-0.0494388	99	0.550902	0.891618	-0.258926	0.555	0.933305	0.994821	0.232232	0.233441	NA	NA	NA	NA	NA	NA
uc001hok.3	NVL	-0.0391695	113	0.613234	0.9134	-0.212374	0.639	0.952679	1.03493	0.240328	0.232216	NA	NA	NA	NA	NA	NA
uc001hom.2	CNIH4	-0.147199	54	0.193438	0.709712	-0.713459	0.232	0.833035	1.64289	0.6208	0.377872	NA	NA	NA	NA	NA	NA
uc001hop.4	WDR26	0.0382554	53	0.737837	0.946069	0.13204	NA	NA	1.00187	0.281711	0.281185	-0.150683	0.0988158	0.296742	10	0.70063	0.988837
uc001hos.1	CNIH3	-0.0579207	24	0.738883	0.946309	-0.131425	NA	NA	0.701384	0.382762	0.545724	-0.01871	0.815231	0.909889	13	0.990991	0.999932
uc001how.2	DNAH14	-0.114384	103	0.159122	0.682372	-0.798271	0.316	0.859317	1.70012	0.887399	0.521964	NA	NA	NA	NA	NA	NA
uc001hoy.3	LBR	0.0722285	111	0.355673	0.809846	0.448949	0.384	0.8845	1.27722	0.257327	0.201474	NA	NA	NA	NA	NA	NA
uc001hpc.1	ENAH	0.0965648	90	0.267178	0.756246	0.573199	0.359	0.876252	2.09764	0.480493	0.229063	0.0187585	0.7264	0.862383	29	0.755	0.993422
uc001hpg.3	SRP9	-0.179399	30	0.244434	0.742877	-0.611838	NA	NA	1.25625	0.484407	0.385599	0.111487	0.180957	0.411272	12	0.46493	0.971468
uc001hpk.3	EPHX1	0.0526639	106	0.510647	0.877828	0.291879	0.522	0.926321	1.15113	0.237023	0.205905	0.0148644	0.870653	0.939007	10	0.782258	0.994873
uc001hpm.2	TMEM63A	0.167136	107	0.0359293	0.511258	1.44455	0.034	0.620791	23.4872	6.25008	0.266106	NA	NA	NA	NA	NA	NA
uc001hpo.3	LEFTY1	0.0140335	92	0.87046	0.97479	0.0602512	0.897	0.988138	0.899509	0.219297	0.243796	NA	NA	NA	NA	NA	NA
uc001hpq.4	PYCR2	0.171156	81	0.0623989	0.555078	1.20482	0.131	0.776485	1.99377	0.516404	0.259009	NA	NA	NA	NA	NA	NA
uc001hpt.2	LEFTY2	-0.0647701	92	0.45166	0.85332	-0.345189	0.454	0.907824	0.920539	0.253568	0.275456	NA	NA	NA	NA	NA	NA
uc001hpu.4	SDE2	-0.0981189	117	0.197474	0.71247	-0.70449	0.295	0.852424	1.71989	0.590042	0.343069	-0.0355677	0.644799	0.812552	14	0.99	0.999932
uc001hpw.3	H3F3A	NA	NA	NA	NA	NA	NA	NA	NA	0.826514	NA	-0.0583725	0.433552	0.665668	15	0.835	0.997631
uc001hpy.3	ACBD3	0.0606629	99	0.464283	0.859304	0.333217	0.48	0.912484	3.25313	0.894278	0.274898	-0.125546	0.0921165	0.284535	15	0.536	0.980846
uc001hqa.3	LIN9	0.166806	66	0.102104	0.620838	0.990956	NA	NA	2.20611	0.607906	0.275555	-0.0575664	0.528304	0.73702	10	0.878378	0.999167
uc001hqd.4	PARP1	0.0662815	109	0.401031	0.829009	0.396823	0.4	0.888028	1.13401	0.247407	0.218169	NA	NA	NA	NA	NA	NA
uc001hqn.1	ADCK3	0.0563123	108	0.477622	0.864932	0.320915	0.558	0.933723	0.900869	0.237916	0.264097	NA	NA	NA	NA	NA	NA
uc001hqr.3	CDC42BPA	0.0955064	107	0.230644	0.735051	0.637057	0.271	0.84933	1.78637	0.366434	0.205128	-0.0192248	0.734186	0.866637	26	0.845	0.999167
uc001hrb.3	JMJD4	-0.0935961	80	0.311272	0.785647	-0.50686	0.365	0.877191	0.547606	0.390602	0.71329	NA	NA	NA	NA	NA	NA
uc001hrf.2	SNAP47	-0.00849018	91	0.921845	0.981379	-0.0353419	0.934	0.989861	0.724439	0.228303	0.315144	NA	NA	NA	NA	NA	NA
uc001hrh.3	PRSS38	-0.196668	79	0.034519	0.507302	-1.46194	NA	NA	1.21282	1.54566	1.27443	-0.0451539	0.572782	0.768348	13	0.891348	0.999167
uc001hri.2	WNT9A	-0.155955	59	0.149168	0.671522	-0.826325	0.281	0.84933	1.4606	0.38628	0.264468	-0.0290697	0.644475	0.812326	21	0.989	0.999932
uc001hrq.2	WNT3A	0.0495028	70	0.617034	0.914398	0.209691	NA	NA	0.937387	0.247314	0.263833	0.051431	0.403367	0.640871	22	0.536	0.980846
uc001hrr.3	ARF1	NA	NA	NA	NA	NA	NA	NA	NA	1.00074	NA	0.0715714	0.371372	0.613309	13	0.413065	0.971468
uc001hrx.3	C1orf35	0.0701	75	0.463147	0.858397	0.334281	0.512	0.921993	1.03447	0.252167	0.243764	0.0715714	0.371372	0.613309	13	0.413065	0.971468
uc001hrz.4	MRPL55	-0.00328215	98	0.96858	0.991877	-0.0138647	0.964	0.994547	1.00051	0.213381	0.213273	0.0540719	0.468187	0.692526	15	0.533534	0.980846
uc001hsk.3	GJC2	-0.0192748	76	0.839051	0.967881	-0.0762118	0.866	0.984178	1.09745	0.269289	0.245377	NA	NA	NA	NA	NA	NA
uc001hsl.4	IBA57	-0.034149	99	0.680369	0.929357	-0.167255	0.673	0.955853	0.354116	0.277739	0.784317	NA	NA	NA	NA	NA	NA
uc001hsq.2	OBSCN	0.160625	113	0.0381917	0.511258	1.41803	0.148	0.787424	0.730735	0.897995	1.22889	NA	NA	NA	NA	NA	NA
uc001hss.3	TRIM11	-0.114637	85	0.200794	0.717154	-0.697249	0.365	0.877191	1.21042	0.438436	0.362218	NA	NA	NA	NA	NA	NA
uc001hsv.3	TRIM17	0.0492327	95	0.560868	0.895377	0.251139	0.679	0.956975	0.302893	0.235403	0.777181	NA	NA	NA	NA	NA	NA
uc001hsx.1	HIST3H3	0.164762	44	0.190721	0.705671	0.719601	NA	NA	1.27562	0.559502	0.438611	NA	NA	NA	NA	NA	NA
uc001hsy.3	HIST3H2A	NA	NA	NA	NA	NA	NA	NA	NA	NA	NA	NA	NA	NA	NA	NA	NA
uc001hsz.3	HIST3H2BB	NA	NA	NA	NA	NA	NA	NA	NA	0.481415	NA	NA	NA	NA	NA	NA	NA
uc001htb.3	RNF187	0.137332	46	0.264324	0.755308	0.577863	NA	NA	0.532794	0.417536	0.783673	NA	NA	NA	NA	NA	NA
uc001htf.3	RHOU	0.0965694	43	0.44861	0.851691	0.348132	NA	NA	0.906001	0.301673	0.332972	NA	NA	NA	NA	NA	NA
uc001htg.2	AX748369	-0.101212	41	0.438578	0.845069	-0.357953	NA	NA	0.606072	0.419185	0.691642	NA	NA	NA	NA	NA	NA
uc001hth.4	RAB4A	0.224776	29	0.152078	0.674714	0.817933	NA	NA	1.26941	0.497381	0.39182	NA	NA	NA	NA	NA	NA
uc001htk.4	SPHAR	-0.0527797	80	0.568006	0.898031	-0.245647	0.581	0.939686	1.3286	0.346122	0.260517	NA	NA	NA	NA	NA	NA
uc001htl.4	CCSAP	-0.132941	51	0.254213	0.749883	-0.594802	NA	NA	1.28339	0.433901	0.33809	NA	NA	NA	NA	NA	NA
uc001htm.3	ACTA1	NA	NA	NA	NA	NA	NA	NA	NA	0.5962	NA	NA	NA	NA	NA	NA	NA
uc001htn.3	NUP133	-0.0970348	112	0.212568	0.724458	-0.672502	0.232	0.833035	0.566096	0.375219	0.662818	NA	NA	NA	NA	NA	NA
uc001htp.4	ABCB10	0.00841731	105	0.916665	0.980613	0.0377892	0.928	0.989275	0.985377	0.207997	0.211084	NA	NA	NA	NA	NA	NA
uc001htq.3	TAF5L	0.0231571	81	0.800947	0.959409	0.0963962	0.815	0.976661	1.01286	0.247888	0.244741	NA	NA	NA	NA	NA	NA
uc001hts.1	URB2	0.0349352	109	0.658036	0.924306	0.18175	0.739	0.970086	1.17183	0.250882	0.214094	NA	NA	NA	NA	NA	NA
uc001htw.3	COG2	-0.0124278	109	0.874883	0.976026	-0.05805	0.894	0.988115	1.03354	0.215409	0.208418	NA	NA	NA	NA	NA	NA
uc001hty.4	AGT	-0.0551969	103	0.496848	0.872954	-0.303776	0.565	0.936921	0.965018	0.235899	0.24445	NA	NA	NA	NA	NA	NA
uc001htz.1	CAPN9	-0.0251296	94	0.767811	0.952324	-0.114746	0.798	0.975675	0.964169	0.231556	0.240161	NA	NA	NA	NA	NA	NA
uc001hub.3	C1orf198	-0.0276252	81	0.763592	0.951788	-0.117139	0.769	0.972237	1.0431	0.252212	0.241791	NA	NA	NA	NA	NA	NA
uc001huf.4	TTC13	0.0760283	86	0.393364	0.826097	0.405205	0.471	0.910502	0.99164	0.245386	0.247454	NA	NA	NA	NA	NA	NA
uc001huh.3	ARV1	-0.0882893	95	0.296993	0.775943	-0.527254	0.365	0.877191	1.39946	0.384841	0.274993	NA	NA	NA	NA	NA	NA
uc001hui.2	FAM89A	0.213703	52	0.0641096	0.559705	1.19308	NA	NA	1.01928	0.362668	0.355807	NA	NA	NA	NA	NA	NA
uc001hul.3	C1orf131	-0.0580795	105	0.470305	0.862505	-0.32762	0.488	0.913228	1.04617	0.254465	0.243235	NA	NA	NA	NA	NA	NA
uc001hup.4	GNPAT	0.0648291	111	0.407094	0.8316	0.390306	0.461	0.909126	1.19092	0.24048	0.201927	NA	NA	NA	NA	NA	NA
uc001huq.3	EXOC8	0.054072	91	0.532078	0.883828	0.274024	0.554	0.933088	1.01824	0.223889	0.219877	NA	NA	NA	NA	NA	NA
uc001hur.4	SPRTN	0.0190628	112	0.806545	0.960653	0.0933712	0.851	0.98295	0.685121	0.202898	0.296149	NA	NA	NA	NA	NA	NA
uc001huv.2	EGLN1	-0.0400665	57	0.715831	0.940429	-0.145189	NA	NA	0.892809	0.292888	0.328053	NA	NA	NA	NA	NA	NA
uc001huw.3	TSNAX	-0.196706	70	0.0469172	0.53162	-1.32867	0.063	0.679425	2.24826	1.49489	0.66491	NA	NA	NA	NA	NA	NA
uc001hvg.3	SIPA1L2	0.0414776	112	0.594149	0.908138	0.226104	0.698	0.962426	0.997376	0.202628	0.203161	-0.0236307	0.714311	0.85619	20	0.936	0.999167
uc001hvh.2	MAP10	-0.181642	113	0.0190783	0.460662	-1.71946	0.014	0.548127	3.50658	1.42143	0.40536	NA	NA	NA	NA	NA	NA
uc001hvj.1	NTPCR	-0.0136143	95	0.872238	0.975278	-0.0593652	0.865	0.984178	1.03953	0.225715	0.217131	NA	NA	NA	NA	NA	NA
uc001hvl.2	PCNXL2	0.0312843	117	0.681134	0.929644	0.166767	0.768	0.972237	1.08407	0.218159	0.201242	-0.0546712	0.549252	0.750904	10	0.44586	0.971468
uc001hvt.4	KIAA1804	-0.0526639	106	0.510647	0.877828	-0.291879	0.546	0.929395	1.39951	0.368539	0.263335	NA	NA	NA	NA	NA	NA
uc001hvy.1	SLC35F3	0.124024	90	0.154126	0.67589	0.812124	0.27	0.848862	0.881999	0.307145	0.348237	-0.04681	0.544042	0.747461	14	0.885427	0.999167
uc001hwc.3	COA6	-0.0131167	54	0.907744	0.979572	-0.0420364	NA	NA	0.852499	0.307637	0.360864	NA	NA	NA	NA	NA	NA
uc001hwd.3	TARBP1	-0.0955127	112	0.219829	0.727239	-0.657914	0.241	0.836227	2.0148	0.435992	0.216395	-0.0421878	0.423469	0.656882	30	0.899	0.999167
uc001hwg.3	IRF2BP2	0	39	1	1	0	NA	NA	0.992206	0.313679	0.316143	-0.0425531	0.328211	0.572179	44	0.803	0.996958
uc001hwl.3	TOMM20	NA	NA	NA	NA	NA	NA	NA	NA	NA	NA	NA	NA	NA	NA	NA	NA
uc001hwn.3	RBM34	-0.0848886	108	0.284395	0.766013	-0.546077	0.223	0.830411	0.796621	0.329953	0.414191	NA	NA	NA	NA	NA	NA
uc001hwq.3	ARID4B	-0.0645766	110	0.41108	0.832417	-0.386074	0.437	0.90302	0.747827	0.28675	0.383445	-0.0617264	0.458874	0.685846	12	0.675703	0.98782
uc001hwv.3	GGPS1	0.00777172	73	0.936063	0.983438	0.0286947	0.943	0.989869	0.156707	0.533836	3.40658	NA	NA	NA	NA	NA	NA
uc001hxa.1	TBCE	-0.168606	105	0.0360883	0.511258	-1.44263	0.026	0.593929	2.64619	1.176	0.444414	NA	NA	NA	NA	NA	NA
uc001hxc.3	B3GALNT2	-0.0605442	107	0.44732	0.850789	-0.349382	0.459	0.909126	1.09326	0.279138	0.255325	NA	NA	NA	NA	NA	NA
uc001hxh.4	GNG4	-0.121462	38	0.371751	0.816962	-0.429748	NA	NA	1.4392	0.460271	0.31981	NA	NA	NA	NA	NA	NA
uc001hxj.3	LYST	-0.0190951	116	0.802804	0.959409	-0.0953904	0.821	0.978028	0.31128	0.293195	0.9419	NA	NA	NA	NA	NA	NA
uc001hxo.3	NID1	-0.0469265	117	0.537648	0.88598	-0.269502	0.608	0.944902	0.633949	0.254008	0.400675	NA	NA	NA	NA	NA	NA
uc001hxp.1	AX747246	-0.0513994	76	0.588079	0.906685	-0.230564	NA	NA	0.643147	0.29381	0.456833	NA	NA	NA	NA	NA	NA
uc001hxq.3	GPR137B	0.0724842	80	0.432946	0.84172	0.363566	0.464	0.909592	0.995084	0.234731	0.235891	NA	NA	NA	NA	NA	NA
uc001hxt.3	ERO1LB	-0.0115168	88	0.895915	0.978669	-0.0477331	0.918	0.988365	0.884415	0.251728	0.284626	NA	NA	NA	NA	NA	NA
uc001hxu.1	EDARADD	-0.03078	93	0.719105	0.941817	-0.143207	0.733	0.9692	0.591012	0.241903	0.409303	NA	NA	NA	NA	NA	NA
uc001hxx.3	LGALS8-AS1	0.0117097	34	0.935283	0.983371	0.0290569	NA	NA	0.998297	0.328974	0.329535	NA	NA	NA	NA	NA	NA
uc001hxy.2	LGALS8	0.0286185	100	0.72858	0.943956	0.137523	0.791	0.975675	0.993593	0.212866	0.214239	NA	NA	NA	NA	NA	NA
uc001hyd.2	HEATR1	-0.0864693	120	0.249946	0.747372	-0.602153	0.267	0.848573	1.40142	0.378447	0.270046	NA	NA	NA	NA	NA	NA
uc001hyf.2	ACTN2	-0.0911894	70	0.356967	0.810698	-0.447371	0.417	0.897236	1.34221	0.33967	0.253068	NA	NA	NA	NA	NA	NA
uc001hyi.4	MTR	-0.0423603	115	0.581264	0.904264	-0.235627	0.613	0.946618	1.38279	0.293236	0.212062	NA	NA	NA	NA	NA	NA
uc001hyl.1	RYR2	-0.026222	110	0.738546	0.946069	-0.131623	0.818	0.976938	1.35106	0.273055	0.202104	-0.104893	0.036867	0.163989	33	0.563	0.981893
uc001hym.3	ZP4	-0.196907	103	0.015356	0.444301	-1.81372	0.026	0.593929	0.488549	4.4389	9.08589	NA	NA	NA	NA	NA	NA
uc001hyp.3	CHRM3	-0.0746627	99	0.367748	0.814728	-0.434449	0.434	0.902626	1.98915	0.430238	0.216292	-0.0856576	0.0673952	0.235766	38	0.603	0.984961
uc001hys.3	GREM2	0.0429781	52	0.709639	0.938508	0.148963	NA	NA	0.784733	0.283825	0.361684	-0.0646528	0.10303	0.303796	53	0.704	0.988848
uc001hyv.2	RGS7	0.300517	62	0.00434851	0.346579	2.36166	0	0	5.70166	3.70049	0.649019	-0.0416667	0.400024	0.638212	34	0.646	0.985384
uc001hyx.3	FH	0.101524	99	0.220671	0.728398	0.656254	0.278	0.84933	0.959786	0.341681	0.355997	NA	NA	NA	NA	NA	NA
uc001hza.3	OPN3	0.0939736	67	0.353343	0.80833	0.451804	0.437	0.90302	1.54823	0.464577	0.300071	NA	NA	NA	NA	NA	NA
uc001hzd.3	CHML	-0.0645301	110	0.411417	0.832417	-0.385718	0.418	0.897236	0.348059	0.217459	0.624775	NA	NA	NA	NA	NA	NA
uc001hzg.2	WDR64	-0.0853895	113	0.270501	0.756312	-0.567831	0.305	0.856514	1.40629	0.318861	0.226739	NA	NA	NA	NA	NA	NA
uc001hzh.3	EXO1	-0.0529619	116	0.488549	0.870099	-0.311092	0.492	0.914847	0.607719	0.237568	0.390917	NA	NA	NA	NA	NA	NA
uc001hzk.2	MAP1LC3C	0.0582689	60	0.586683	0.905847	0.231597	NA	NA	0.669136	0.320308	0.478689	NA	NA	NA	NA	NA	NA
uc001hzn.2	PLD5	0.0895961	93	0.295145	0.775721	0.529965	0.3	0.855207	1.12767	0.266326	0.236173	0.0282457	0.611173	0.792544	27	0.323	0.971468
uc001hzw.3	SDCCAG8	-0.0871411	112	0.262954	0.754401	-0.580121	0.304	0.855882	0.95363	0.355255	0.372529	-0.00991753	0.773803	0.888567	70	0.919	0.999167
uc001iab.2	AKT3	-0.0134595	24	0.938258	0.983723	-0.0276778	NA	NA	1.04088	0.398505	0.382853	0.0228109	0.415981	0.650459	106	0.823	0.997631
uc001iah.4	C1orf100	-0.160379	98	0.05426	0.539072	-1.26552	0.047	0.649558	1.61273	3.52952	2.18854	NA	NA	NA	NA	NA	NA
uc001iaj.3	ADSS	0.189535	76	0.0458003	0.528197	1.33913	0.08	0.710218	5.84549	1.73068	0.296071	NA	NA	NA	NA	NA	NA
uc001iam.3	C1orf101	-0.290187	111	0.000206566	0.204553	-3.68494	0	0	1.42824	56.3397	39.4468	NA	NA	NA	NA	NA	NA
uc001iao.3	DESI2	0.0379136	50	0.747574	0.948094	0.126346	NA	NA	NA	0.283364	NA	NA	NA	NA	NA	NA	NA
uc001iar.3	COX20	-0.108066	81	0.239368	0.740202	-0.620934	0.201	0.817764	1.02647	0.405069	0.394622	NA	NA	NA	NA	NA	NA
uc001iaz.1	HNRNPU	-0.0670422	71	0.495118	0.872196	-0.305291	0.645	0.953554	1.1003	0.269825	0.245228	NA	NA	NA	NA	NA	NA
uc001ibc.2	EFCAB2	-0.121838	86	0.171371	0.691182	-0.766063	0.231	0.833035	1.1101	0.335641	0.302352	0.199285	9.42411e-05	0.00283956	32	0.003	0.66785
uc001ibf.1	KIF26B	0.0933138	116	0.222341	0.728768	0.652981	0.322	0.8608	13.0853	2.60331	0.198949	0.157749	4.65684e-09	1.04261e-06	115	0.028	0.8222
uc001ibl.3	SMYD3	0.0161376	95	0.848821	0.9702	0.071184	0.881	0.987008	1.15605	0.25565	0.221141	0.0856551	0.00186177	0.0230822	110	0.149	0.902941
uc001ibn.3	TFB2M	-0.202098	107	0.0111955	0.425255	-1.95096	0.034	0.620791	0.695426	2.62876	3.78007	0.098228	0.238513	0.479286	12	0.381	0.971468
uc001ibp.3	CNST	-0.0698976	106	0.382609	0.821466	-0.417245	0.45	0.905799	1.26649	0.27465	0.216859	NA	NA	NA	NA	NA	NA
uc001ibr.3	SCCPDH	0.0240663	104	0.765923	0.951933	0.115815	0.734	0.9692	0.747952	0.208943	0.279353	-0.0246734	0.740629	0.870118	15	0.756	0.993422
uc001ibv.2	AHCTF1	-0.203767	115	0.00797574	0.388947	-2.09823	0.009	0.507049	1.23333	1.60631	1.30241	0.0234819	0.769306	0.886291	13	0.812	0.997631
uc001ico.3	ZNF496	-0.0661646	92	0.441979	0.847097	-0.354598	0.524	0.926321	1.47786	0.33179	0.224507	NA	NA	NA	NA	NA	NA
uc001icr.3	NLRP3	-0.131229	93	0.125184	0.644739	-0.902451	0.284	0.849398	1.79698	0.751746	0.418338	NA	NA	NA	NA	NA	NA
uc001icz.2	OR2W5	-0.0769149	65	0.454534	0.854563	-0.342434	0.456	0.909002	1.2376	0.314134	0.253824	NA	NA	NA	NA	NA	NA
uc001idf.3	GCSAML	-0.0770305	52	0.504545	0.876221	-0.2971	NA	NA	0.101727	0.368654	3.62396	NA	NA	NA	NA	NA	NA
uc001idi.1	OR13G1	0.0228187	59	0.832842	0.966307	0.0794374	NA	NA	0.996502	0.27035	0.271299	NA	NA	NA	NA	NA	NA
uc001idj.1	OR6F1	0.0399709	55	0.721457	0.942209	0.141789	NA	NA	5.74379e-07	0.275116	478980	NA	NA	NA	NA	NA	NA
uc001idm.1	OR14A16	-0.217786	24	0.210075	0.724458	-0.677626	NA	NA	1.20612	0.469575	0.389328	NA	NA	NA	NA	NA	NA
uc001idn.1	OR11L1	0.266492	72	0.00630923	0.370124	2.20002	NA	NA	7.83292	1.94256	0.247999	NA	NA	NA	NA	NA	NA
uc001ido.3	TRIM58	-0.0670884	89	0.443383	0.848008	-0.353221	0.56	0.934945	0.482646	0.24502	0.50766	NA	NA	NA	NA	NA	NA
uc001ids.3	OR2L13	-0.104773	44	0.405381	0.8313	-0.392137	NA	NA	1.19724	0.380578	0.317879	NA	NA	NA	NA	NA	NA
uc001idt.1	OR2L8	-0.0373838	40	0.777619	0.95549	-0.109233	NA	NA	1.10056	0.339881	0.308826	NA	NA	NA	NA	NA	NA
uc001idv.1	OR2L1P	0.0205532	38	0.879864	0.976786	0.0555845	NA	NA	0.167114	0.317336	1.89892	NA	NA	NA	NA	NA	NA
uc001idw.3	OR2L2	0.0569142	34	0.69309	0.933895	0.15921	NA	NA	1.00386	0.330725	0.329454	NA	NA	NA	NA	NA	NA
uc001idx.1	OR2L3	0.0669462	35	0.637352	0.920415	0.195621	NA	NA	1.00897	0.328676	0.325755	NA	NA	NA	NA	NA	NA
uc001ieh.1	OR2T4	-0.0133333	50	0.909885	0.979867	-0.0410134	NA	NA	0.937338	0.292761	0.312332	NA	NA	NA	NA	NA	NA
uc001iei.1	OR2T6	0.0635389	64	0.539943	0.887537	0.267652	NA	NA	1.25482	0.329372	0.262486	NA	NA	NA	NA	NA	NA
uc001iek.1	OR2T2	0.198051	65	0.0541372	0.539072	1.2665	0.1	0.739245	1.93423	1.19621	0.618442	NA	NA	NA	NA	NA	NA
uc001iel.1	OR2T3	0.266292	53	0.0198086	0.46207	1.70315	NA	NA	6.01287	1.65997	0.27607	NA	NA	NA	NA	NA	NA
uc001iem.1	OR2T5	0.0158178	48	0.895418	0.978669	0.0479739	NA	NA	1.03623	0.302252	0.291683	NA	NA	NA	NA	NA	NA
uc001ien.1	OR2G6	NA	NA	NA	NA	NA	NA	NA	1.04295	0.427147	0.409557	NA	NA	NA	NA	NA	NA
uc001ieo.2	OR2T29	0.00681747	51	0.953374	0.988561	0.0207368	NA	NA	0.963362	0.280861	0.291543	NA	NA	NA	NA	NA	NA
uc001iep.1	OR2T34	-0.0133892	35	0.924886	0.981472	-0.0339118	NA	NA	NA	0.330592	NA	NA	NA	NA	NA	NA	NA
uc001ier.1	OR2T11	0.118663	63	0.256221	0.750976	0.591386	0.348	0.874666	0.044355	0.635369	14.3246	NA	NA	NA	NA	NA	NA
uc001ies.1	OR2T35	0.204963	63	0.0498683	0.533066	1.30218	0.088	0.727574	2.31888	2.37284	1.02327	NA	NA	NA	NA	NA	NA
uc001iew.1	SH3BP5L	-0.0124523	84	0.890143	0.978603	-0.05054	0.885	0.987128	0.761734	0.227952	0.299254	NA	NA	NA	NA	NA	NA
uc001iex.3	ZNF672	-0.0461336	78	0.622257	0.916337	-0.20603	0.71	0.966052	0.799913	0.296669	0.370877	NA	NA	NA	NA	NA	NA
uc001ifc.2	ZNF692	-0.0578609	95	0.494309	0.872074	-0.306002	0.571	0.938566	0.312567	0.316289	1.01191	NA	NA	NA	NA	NA	NA
uc001ifh.3	PGBD2	-0.0579452	69	0.561225	0.895377	-0.250863	NA	NA	1.00431	0.253717	0.252627	NA	NA	NA	NA	NA	NA
uc001ifp.3	DIP2C	0.0664142	67	0.511865	0.877828	0.290844	0.536	0.927524	0.929039	0.253243	0.272586	-0.0726625	0.403823	0.640964	11	0.483483	0.97649
uc001ift.3	GTPBP4	0.0821006	101	0.317029	0.787049	0.498901	0.35	0.874954	1.12454	0.305854	0.271982	NA	NA	NA	NA	NA	NA
uc001ifv.1	IDI2	0.107722	66	0.291103	0.771143	0.535954	NA	NA	0.921991	0.253754	0.275224	NA	NA	NA	NA	NA	NA
uc001iga.3	IDI1	0.0806322	85	0.368218	0.814728	0.433895	0.372	0.881364	1.29017	0.298963	0.231724	NA	NA	NA	NA	NA	NA
uc001igf.1	WDR37	-0.00786852	77	0.933476	0.983206	-0.0298969	0.952	0.9914	0.742584	0.238964	0.321801	0.0235978	0.751556	0.876317	15	0.463	0.971468
uc001igp.3	PFKP	-0.0238195	109	0.762811	0.951788	-0.117583	0.775	0.973155	0.925731	0.241796	0.261195	NA	NA	NA	NA	NA	NA
uc001iha.3	KLF6	0.0985021	72	0.312714	0.786799	0.504853	0.386	0.8845	1.4036	0.456227	0.325041	-0.00994993	0.871573	0.939217	22	0.958	0.999167
uc001ihi.4	AKR1E2	-0.0272178	85	0.761328	0.951598	-0.118428	0.753	0.971562	0.633607	0.228776	0.36107	NA	NA	NA	NA	NA	NA
uc001iht.3	AKR1C2	0.0603206	73	0.533534	0.884272	0.272838	NA	NA	0.914977	0.303609	0.331822	NA	NA	NA	NA	NA	NA
uc001ihw.2	AKR1C4	0.113112	75	0.236476	0.739894	0.626214	NA	NA	0.600047	0.364798	0.607949	NA	NA	NA	NA	NA	NA
uc001ihx.1	UCN3	0.0186604	106	0.815692	0.962548	0.0884739	0.832	0.980259	1.01766	0.209821	0.20618	NA	NA	NA	NA	NA	NA
uc001ihy.3	TUBAL3	0.17887	97	0.0327238	0.505233	1.48514	0.052	0.655938	3.46833	0.935901	0.269842	NA	NA	NA	NA	NA	NA
uc001iia.4	NET1	0.0201976	105	0.801756	0.959409	0.0959578	0.818	0.976938	1.00913	0.208311	0.206426	NA	NA	NA	NA	NA	NA
uc001iic.2	CALML5	0.0261246	106	0.744178	0.946567	0.128323	0.764	0.972237	1.06868	0.231267	0.216405	NA	NA	NA	NA	NA	NA
uc001iie.1	CALML3	0.216841	76	0.0223149	0.47177	1.65141	0.034	0.620791	0.894545	0.874769	0.977892	NA	NA	NA	NA	NA	NA
uc001iig.2	ASB13	0.0332125	83	0.714256	0.940306	0.146146	0.75	0.971413	0.944223	0.231803	0.245496	NA	NA	NA	NA	NA	NA
uc001iij.3	FAM208B	-0.0860318	117	0.258468	0.752836	-0.587593	0.323	0.861092	0.517189	0.28471	0.550495	NA	NA	NA	NA	NA	NA
uc001iil.4	GDI2	-0.0180388	75	0.850252	0.97033	-0.0704522	0.868	0.984642	0.304223	0.247705	0.81422	NA	NA	NA	NA	NA	NA
uc001iit.4	FBXO18	-0.106583	113	0.169006	0.690078	-0.772097	0.312	0.858861	0.952696	0.469326	0.492629	NA	NA	NA	NA	NA	NA
uc001iiz.2	IL2RA	-0.0777659	96	0.355736	0.809846	-0.448872	0.465	0.909592	0.450874	0.272931	0.605338	0.0848787	0.32948	0.573255	11	0.189691	0.922865
uc001ijb.3	RBM17	-0.140956	30	0.360427	0.812385	-0.443183	NA	NA	NA	0.411214	NA	0.0212974	0.79024	0.897322	13	0.53575	0.980846
uc001ije.3	PFKFB3	-0.114147	80	0.216872	0.724458	-0.663796	0.314	0.859317	0.930432	0.389868	0.419019	0.037976	0.622568	0.798584	14	0.464393	0.971468
uc001ijj.2	PRKCQ	-0.0625726	94	0.462251	0.858248	-0.335122	0.546	0.929395	1.07191	0.232833	0.217214	-0.118484	0.111927	0.317541	15	0.158	0.907511
uc001ijs.3	ITIH2	-0.00667996	117	0.930083	0.982837	-0.0314783	0.937	0.989861	1.04899	0.206673	0.197021	NA	NA	NA	NA	NA	NA
uc001ijt.3	KIN	-0.0959786	85	0.284136	0.765754	-0.546474	0.374	0.881364	1.3482	0.322912	0.239514	-0.0956834	0.199249	0.433337	15	0.26	0.959755
uc001iju.3	ATP5C1	0.0962636	87	0.276986	0.761367	0.557542	0.27	0.848862	0.84327	0.254419	0.301705	-0.0523722	0.454459	0.682238	17	0.502	0.977324
uc001ijz.3	GATA3	-0.0502426	74	0.601508	0.909661	-0.220758	0.68	0.956975	0.372985	0.276995	0.742644	0.0660876	0.0609717	0.221366	67	0.323	0.971468
uc001ikl.4	CELF2	0.202786	29	0.196317	0.71149	0.707043	NA	NA	1.46841	0.549712	0.374358	0.0568177	0.015267	0.0913735	152	0.29	0.966111
uc001iks.1	USP6NL	0.0613493	115	0.424417	0.838793	0.372207	0.39	0.885066	1.16263	0.231133	0.198802	-0.0543587	0.366505	0.608764	23	0.461	0.971468
uc001ikw.4	ECHDC3	0.150496	111	0.0542909	0.539072	1.26527	0.046	0.647307	3.06954	2.24976	0.732933	NA	NA	NA	NA	NA	NA
uc001ikx.3	PROSER2	0.0396991	109	0.614975	0.9134	0.211143	0.63	0.950161	1.01945	0.207089	0.203137	NA	NA	NA	NA	NA	NA
uc001ilb.3	UPF2	0.0100441	89	0.908639	0.979717	0.0416085	0.915	0.988138	1.00208	0.222312	0.221851	NA	NA	NA	NA	NA	NA
uc001ild.5	DHTKD1	0.107487	104	0.183629	0.700609	0.736059	0.21	0.825324	5.4789	1.18288	0.215898	NA	NA	NA	NA	NA	NA
uc001ile.2	SEC61A2	NA	NA	NA	NA	NA	NA	NA	NA	0.449114	NA	NA	NA	NA	NA	NA	NA
uc001ilj.3	NUDT5	0.157385	87	0.0755085	0.586552	1.122	0.111	0.753562	2.09012	0.482268	0.230737	NA	NA	NA	NA	NA	NA
uc001ill.3	CDC123	0.104856	80	0.25664	0.750976	0.590675	0.293	0.851578	1.02511	0.290448	0.283333	NA	NA	NA	NA	NA	NA
uc001ilo.3	CAMK1D	0.0947736	64	0.360617	0.812385	0.442954	0.413	0.894043	0.917563	0.420843	0.458652	0.151982	0.00990532	0.0685884	24	0.032	0.828045
uc001ilq.1	CCDC3	0.133888	81	0.144923	0.668546	0.838861	0.189	0.808991	2.05594	0.982973	0.478113	NA	NA	NA	NA	NA	NA
uc001ilx.1	OPTN	-0.00508786	110	0.948363	0.986284	-0.0230256	0.952	0.9914	0.855195	0.20402	0.238565	NA	NA	NA	NA	NA	NA
uc001ima.3	MCM10	0.00929305	111	0.905404	0.979188	0.0431575	0.893	0.988115	0.521405	0.201932	0.387284	NA	NA	NA	NA	NA	NA
uc001imd.3	UCMA	0.224922	98	0.00694746	0.373495	2.15817	0.028	0.606471	19.3181	11.8078	0.611232	NA	NA	NA	NA	NA	NA
uc001imf.3	PHYH	0.153742	104	0.0571893	0.54601	1.24269	0.139	0.784457	3.53103	1.06225	0.300832	NA	NA	NA	NA	NA	NA
uc001imk.3	SEPHS1	0.144115	26	0.386476	0.823265	0.412877	NA	NA	NA	0.368731	NA	NA	NA	NA	NA	NA	NA
uc001imm.2	BEND7	-0.0920954	107	0.247726	0.744807	-0.606028	0.33	0.864113	1.07903	0.51222	0.474705	0.132824	0.0132238	0.082848	29	0.146	0.90025
uc001imp.3	PRPF18	-0.14045	46	0.253631	0.749488	-0.595798	NA	NA	1.38768	0.478998	0.345179	0.141471	0.0187631	0.104585	23	0.242	0.957761
uc001ims.3	FRMD4A	0.0569743	86	0.522418	0.881196	0.281982	0.569	0.938522	13.7941	3.21471	0.23305	0.149508	3.62605e-06	0.000255248	80	0.04	0.850463
uc001ina.1	FAM107B	0.016202	107	0.838861	0.967781	0.0763102	0.855	0.984042	0.143946	0.222703	1.54713	0.0607391	0.415141	0.64985	15	0.301	0.968161
uc001inb.1	CDNF	-0.0814862	96	0.333194	0.795148	-0.477303	0.339	0.870291	0.903943	0.250872	0.27753	NA	NA	NA	NA	NA	NA
uc001inf.4	HSPA14	0.111124	98	0.182325	0.699317	0.739154	0.25	0.841221	1.76145	0.375925	0.213417	NA	NA	NA	NA	NA	NA
uc001inn.3	DCLRE1C	0.0177508	111	0.820429	0.963786	0.085959	0.838	0.981347	0.934502	0.201299	0.215408	NA	NA	NA	NA	NA	NA
uc001inu.2	OLAH	0.0201989	96	0.810427	0.961357	0.0912861	0.804	0.97597	0.993691	0.214665	0.216028	NA	NA	NA	NA	NA	NA
uc001inw.3	C10orf111	-0.161168	64	0.120034	0.643454	-0.920696	NA	NA	1.00854	0.645395	0.63993	NA	NA	NA	NA	NA	NA
uc001inx.5	RPP38	-0.0028725	106	0.971377	0.99281	-0.012612	0.963	0.993913	0.9174	0.215712	0.235134	NA	NA	NA	NA	NA	NA
uc001inz.1	NMT2	0.0674617	76	0.47716	0.86451	0.321336	0.501	0.918549	1.05337	0.323408	0.307022	NA	NA	NA	NA	NA	NA
uc001iob.3	FAM171A1	0.0931194	110	0.235893	0.739894	0.627285	0.292	0.85091	3.83779	0.776037	0.202209	0.0194661	0.800807	0.902803	14	0.706	0.988848
uc001ioc.1	ITGA8	0.0248597	116	0.7451	0.94694	0.127785	0.787	0.975315	0.464731	0.39635	0.852859	0.0597079	0.180133	0.410381	42	0.154	0.90469
uc001iod.1	FAM188A	0.108996	82	0.232413	0.737309	0.63374	0.247	0.839606	0.306051	0.607221	1.98405	0.0979647	0.0549078	0.207335	32	0.213	0.934869
uc001ioi.2	PTER	0.0957085	101	0.243443	0.742524	0.613603	0.234	0.833167	1.01167	0.485232	0.479636	0.140345	6.91977e-05	0.00224892	67	0.027	0.811364
uc001ioj.1	C1QL3	-0.0313112	17	0.881497	0.976941	-0.0547789	NA	NA	1	0.446322	0.446322	0.156051	0.00021079	0.00511736	47	0.037	0.841293
uc001iol.3	RSU1	0.0127661	51	0.912814	0.980115	0.0396177	NA	NA	0.936187	0.282056	0.301281	0.138674	6.61441e-06	0.000402356	88	0.022	0.788781
uc001ioo.3	CUBN	-0.0159276	119	0.832873	0.966307	-0.0794211	0.874	0.986458	0.112122	0.199925	1.78311	0.083025	0.0486576	0.193335	47	0.13	0.89294
uc001iop.3	TRDMT1	0.0187182	104	0.816885	0.963066	0.0878392	0.777	0.973374	0.995816	0.207309	0.20818	0.113497	0.0593644	0.217721	23	0.017	0.788781
uc001iou.2	VIM	0.0961562	72	0.324378	0.790819	0.488948	0.35	0.874954	0.830733	0.249315	0.300115	0.129402	0.0507175	0.19763	19	0.023	0.788781
uc001ipd.3	ST8SIA6	0.023324	101	0.776214	0.955081	0.110018	0.795	0.975675	0.93296	0.228339	0.244747	0.115275	0.0218007	0.115449	33	0.043	0.850463
uc001ipg.3	PTPLA	0.230687	50	0.050201	0.533346	1.29929	NA	NA	9.25822	3.0958	0.334384	NA	NA	NA	NA	NA	NA
uc001ipj.2	STAM	0.180277	92	0.0361819	0.511258	1.44151	0.034	0.620791	7.74011	1.69964	0.219588	0.252638	0.00564952	0.0474324	10	0.0599793	0.863874
uc001ipo.2	SLC39A12	0.0936546	114	0.224749	0.7307	0.648302	0.239	0.835285	4.38687	0.885954	0.201956	0.0675637	0.381191	0.620558	14	0.183	0.919505
uc001ipr.2	CACNB2	0.140114	97	0.0943719	0.613827	1.02516	0.214	0.82752	0.739212	5.73809	7.76244	0.17603	0.000115087	0.00331287	40	0.016	0.788781
uc001iqd.1	ARL5B	-0.104919	19	0.595163	0.908318	-0.225364	NA	NA	NA	0.457645	NA	NA	NA	NA	NA	NA	NA
uc001iqg.1	PLXDC2	0.0771077	94	0.364981	0.813909	0.43773	0.455	0.908531	3.46651	1.12792	0.325377	0.000153188	0.997289	0.998632	41	0.574	0.982174
uc001iqi.3	NEBL	0.105406	112	0.175711	0.695811	0.755201	0.211	0.825478	6.03233	1.33354	0.221066	0.0811472	0.00643083	0.051626	94	0.123	0.89294
uc001iqm.3	C10orf113	-0.0712521	100	0.387603	0.823794	-0.411613	0.415	0.89624	0.0581442	0.324615	5.58292	0.0577584	0.194775	0.428142	42	0.19	0.922865
uc001iqn.4	C10orf114	0.0181932	91	0.833485	0.966307	0.0791024	0.834	0.980747	0.994732	0.221136	0.222307	NA	NA	NA	NA	NA	NA
uc001irc.3	DNAJC1	-0.0370497	111	0.635655	0.920069	-0.196778	0.661	0.955853	0.501159	0.211717	0.422455	0.0916975	0.0419707	0.176312	41	0.338	0.971468
uc001iri.3	SPAG6	0.111654	76	0.239372	0.740202	0.620926	0.294	0.851603	1.61768	0.403136	0.249206	0.0458891	0.265854	0.508377	49	0.571	0.982174
uc001irl.4	PIP4K2A	0.163451	48	0.17436	0.693957	0.758554	NA	NA	1.71372	0.550893	0.321461	0.120203	0.00845487	0.0617804	40	0.089	0.89294
uc001irm.4	ARMC3	-0.0936898	109	0.23521	0.739268	-0.628544	0.286	0.850575	0.916428	0.386923	0.422208	-0.0195776	0.719709	0.859705	28	0.884	0.999167
uc001iro.3	MSRB2	0.0369548	100	0.654082	0.92318	0.184368	0.671	0.955853	0.999652	0.210912	0.210986	0.103811	0.0247273	0.126406	39	0.244	0.957761
uc001irp.3	PTF1A	0.0630656	64	0.542966	0.887758	0.265227	0.562	0.93586	1.08866	0.290197	0.266564	0.112488	0.0115638	0.0760233	42	0.264	0.959755
uc001irr.2	OTUD1	0.138475	43	0.277236	0.761719	0.55715	NA	NA	0.848675	0.350891	0.413457	0.194078	0.00716336	0.0550962	16	0.011	0.782772
uc001iru.4	KIAA1217	0.0616087	116	0.420416	0.837843	0.37632	0.464	0.909592	1.54304	0.43304	0.280641	0.0464423	0.0945981	0.288879	108	0.393	0.971468
uc001isb.2	ARHGAP21	0.0343264	115	0.65492	0.92318	0.183811	0.675	0.955853	0.827794	0.275442	0.332742	0.060842	0.199863	0.434204	37	0.456	0.971468
uc001ise.1	PRTFDC1	0.129472	85	0.1485	0.670851	0.828272	0.312	0.858861	2.35602	0.538788	0.228686	0.0219037	0.677723	0.833431	30	0.724	0.990245
uc001isg.2	ENKUR	0.00312451	97	0.970244	0.992365	0.0131191	0.974	0.995895	0.975465	0.213669	0.219044	0.0195535	0.734864	0.86676	25	0.821	0.997631
uc001isi.4	THNSL1	-0.0365232	109	0.643546	0.920736	-0.19142	0.674	0.955853	1.04108	0.216569	0.208023	-0.00306465	0.966129	0.984388	16	0.936	0.999167
uc001isj.3	GPR158	0.0789024	116	0.302138	0.779445	0.519795	0.313	0.859317	1.65501	0.342287	0.206819	0.0159173	0.751446	0.876292	33	0.841	0.999167
uc001isn.2	MYO3A	0.0488908	116	0.522577	0.881196	0.28185	0.54	0.927524	1.6135	0.406822	0.252137	0.11835	0.0492869	0.194553	23	0.146	0.90025
uc001isp.2	GAD2	0.0911462	91	0.292226	0.773282	0.534282	0.274	0.84933	3.44997	1.35128	0.391678	0.114552	0.20954	0.445147	10	0.155532	0.906157
uc001iss.3	APBB1IP	0.0605041	112	0.43701	0.844581	0.359508	0.412	0.893004	0.939212	0.243735	0.25951	0.0228748	0.802142	0.903352	10	0.504525	0.977324
uc001isv.3	PDSS1	0.149452	100	0.0699564	0.574051	1.15517	0.03	0.614503	2.23226	0.476256	0.213351	-0.00361533	0.953159	0.979228	22	0.549	0.980846
uc001isx.3	ABI1	-0.0657152	65	0.522837	0.88128	-0.281634	0.534	0.927524	1.20977	0.320366	0.264817	0.062396	0.372839	0.614662	17	0.325325	0.971468
uc001itj.3	YME1L1	0.0104056	87	0.906455	0.979358	0.0426539	0.915	0.988138	0.980837	0.227785	0.232236	NA	NA	NA	NA	NA	NA
uc001itm.3	MASTL	-0.123355	116	0.106701	0.628606	-0.971833	0.143	0.785053	1.33337	0.571608	0.428694	NA	NA	NA	NA	NA	NA
uc001itu.2	PTCHD3	-0.126273	70	0.202113	0.717527	-0.694407	NA	NA	1.32859	0.326777	0.245958	NA	NA	NA	NA	NA	NA
uc001itw.4	RAB18	0.104675	69	0.293907	0.774236	0.531791	NA	NA	1.12986	0.332385	0.294182	0.0991282	0.0799672	0.262273	26	0.332	0.971468
uc001itx.4	MKX	0.0525148	90	0.546226	0.889753	0.262627	0.615	0.946618	0.899446	0.23102	0.256847	0.0611527	0.109776	0.31493	57	0.307	0.971468
uc001itz.3	ARMC4	0.0246134	109	0.755154	0.950085	0.121964	0.787	0.975315	0.528875	0.20953	0.396181	0.0899708	0.0232818	0.121277	53	0.083	0.89294
uc001iua.1	MPP7	0.241472	98	0.00375583	0.328714	2.42529	0.01	0.507049	35.8506	43.511	1.21368	0.143932	0.00063097	0.0109004	47	0.012	0.782772
uc001iuf.3	WAC	0.222216	79	0.0169146	0.451826	1.77174	0.029	0.608528	0.509371	5.3602	10.5232	0.174781	0.00677723	0.0534225	20	0.161	0.907511
uc001iuj.1	BAMBI	0.159194	71	0.105256	0.627481	0.977754	0.106	0.749561	1.5503	0.477005	0.307685	0.217336	0.000123662	0.00350587	26	0.098	0.89294
uc001iul.3	LYZL1	-0.164734	83	0.0693577	0.573032	-1.15891	0.088	0.727574	2.48766	0.650514	0.261496	0.203061	0.000197661	0.00488695	28	0.01	0.782772
uc001iut.1	SVIL	0.13438	117	0.0775519	0.590439	1.11041	0.122	0.771984	2.68527	0.535471	0.19941	0.151025	0.0103807	0.0706958	24	0.062	0.863874
uc001iux.3	KIAA1462	0.0825052	116	0.280598	0.762505	0.551915	0.379	0.882317	0.596659	0.259149	0.434334	0.194655	0.0253272	0.128187	11	0.0170341	0.788781
uc001iva.4	MTPAP	0.0643125	109	0.415167	0.834606	0.381778	0.457	0.909121	1.48935	0.303512	0.203788	NA	NA	NA	NA	NA	NA
uc001ivk.3	LYZL2	-0.168887	77	0.0731938	0.580777	-1.13553	0.116	0.760466	2.2282	0.607305	0.272554	0.108906	0.0544077	0.20622	26	0.31	0.971468
uc001ivu.4	ZEB1	0.27904	108	0.0004334	0.252855	3.36311	0	0	2.21387	48.9382	22.1052	0.12357	0.0211634	0.113529	29	0.082	0.89294
uc001ivz.2	ARHGAP12	0.116714	100	0.157002	0.680089	0.804094	0.161	0.793077	1.87493	0.398767	0.212684	0.0729199	0.247058	0.489861	21	0.374	0.971468
uc001iwe.4	KIF5B	0.200129	80	0.0303828	0.497146	1.51737	0.034	0.620791	0.0711771	1.91347	26.8832	0.0826004	0.284351	0.527108	14	0.424273	0.971468
uc001iwg.2	EPC1	0.123389	90	0.156246	0.678636	0.80619	0.185	0.808938	0.431061	0.602497	1.39771	0.0267936	0.693749	0.842556	18	0.804	0.996958
uc001iwk.3	CCDC7	-0.0865165	86	0.33141	0.793759	-0.479635	NA	NA	1.16229	0.357757	0.307803	0.0757415	0.309557	0.554991	15	0.487487	0.97649
uc001iwn.4	C10orf68	0.00978892	67	0.922981	0.981379	0.0348073	NA	NA	0.60424	0.251546	0.416301	NA	NA	NA	NA	NA	NA
uc001iwt.4	ITGB1	-0.0472776	88	0.591239	0.908138	-0.228237	0.585	0.939686	1.004	0.225486	0.224587	-0.0298365	0.731757	0.865311	11	0.878636	0.999167
uc001iwx.4	NRP1	0.0698328	102	0.392354	0.825666	0.406322	0.374	0.881364	0.947024	0.217216	0.229367	0.0294542	0.271894	0.515518	116	0.697	0.988837
uc001iyb.3	CREM	0.0442772	75	0.643071	0.920736	0.191741	0.645	0.953554	0.913408	0.283292	0.310149	NA	NA	NA	NA	NA	NA
uc001iyw.4	CCNY	-0.00988758	42	0.938915	0.983871	-0.0273736	NA	NA	0.0795471	0.367895	4.62488	0.00458205	0.952642	0.979228	14	0.916	0.999167
uc001iyy.1	GJD4	-0.100546	98	0.227558	0.733275	-0.642908	0.232	0.833035	1.41983	0.410192	0.288901	-0.0092214	0.880903	0.945315	22	0.966	0.999167
uc001iyz.1	FZD8	-0.0486055	43	0.702918	0.936468	-0.153096	NA	NA	1.12583	0.338493	0.30066	0.00951425	0.874412	0.941082	23	0.918	0.999167
uc001iza.1	ANKRD30A	-0.111884	35	0.430791	0.840919	-0.365733	NA	NA	1.30935	0.479743	0.366399	-0.00883997	0.896632	0.952218	18	0.934	0.999167
uc001ize.1	ZNF25	-0.053921	98	0.517554	0.880368	-0.286044	0.566	0.937273	0.996253	0.212697	0.213497	NA	NA	NA	NA	NA	NA
uc001izl.3	ZNF37A	-0.095746	51	0.411548	0.832417	-0.38558	NA	NA	1.05649	0.417046	0.394745	NA	NA	NA	NA	NA	NA
uc001jaf.1	ZNF33B	-0.236892	67	0.0193019	0.46094	-1.7144	NA	NA	1.21269	0.839081	0.691919	-0.0114178	0.882352	0.946153	14	0.891	0.999167
uc001jaj.3	BMS1	-0.00750586	113	0.922838	0.981379	-0.0348745	0.922	0.989159	1.04736	0.213998	0.204321	0.0265057	0.731189	0.865084	14	0.734	0.990245
uc001jal.3	RET	0.032119	113	0.678523	0.929277	0.168436	0.733	0.9692	0.965267	0.214944	0.222679	0.104714	0.0819342	0.266018	23	0.315	0.971468
uc001jan.4	CSGALNACT2	0.0662113	90	0.446774	0.850445	0.349912	0.497	0.918039	1.13368	0.252576	0.222794	0.110831	0.0785234	0.259119	21	0.326	0.971468
uc001jap.1	RASGEF1A	0.0574883	85	0.52117	0.881196	0.28302	0.614	0.946618	0.894607	0.229279	0.25629	NA	NA	NA	NA	NA	NA
uc001jaq.1	FXYD4	-0.100626	65	0.327859	0.792921	-0.484313	0.34	0.871701	0.589324	0.386418	0.655697	NA	NA	NA	NA	NA	NA
uc001jas.2	HNRNPF	0.127128	45	0.307014	0.782431	0.512842	NA	NA	0.503507	0.32638	0.648214	NA	NA	NA	NA	NA	NA
uc001jbc.3	ZNF32	-0.0527592	46	0.668051	0.927391	-0.17519	NA	NA	0.835759	0.323272	0.386801	NA	NA	NA	NA	NA	NA
uc001jbn.2	TMEM72	0.135587	100	0.100161	0.619685	0.999299	0.081	0.710934	2.09813	0.473817	0.225829	NA	NA	NA	NA	NA	NA
uc001jbo.3	RASSF4	0.0335343	102	0.681256	0.929644	0.16669	0.714	0.966394	0.425105	0.220803	0.519407	NA	NA	NA	NA	NA	NA
uc001jbr.4	C10orf10	0.0113423	106	0.887335	0.97816	0.0519126	0.879	0.986841	0.93049	0.205504	0.220856	NA	NA	NA	NA	NA	NA
uc001jbv.2	C10orf25	-0.102225	53	0.371093	0.816492	-0.430517	NA	NA	0.943424	0.418669	0.443776	NA	NA	NA	NA	NA	NA
uc001jbw.3	ZNF22	-0.156902	82	0.0856089	0.604181	-1.06748	0.125	0.772941	0.795518	0.554304	0.696784	NA	NA	NA	NA	NA	NA
uc001jcc.1	OR13A1	0.16546	82	0.0698634	0.574051	1.15575	0.125	0.772941	2.99381	0.691977	0.231136	NA	NA	NA	NA	NA	NA
uc001jce.4	ALOX5	0.133835	105	0.0961728	0.615997	1.01695	0.125	0.772941	0.311763	1.20475	3.86432	NA	NA	NA	NA	NA	NA
uc001jch.2	43898	0.122621	109	0.120281	0.643454	0.919805	0.178	0.803259	3.05084	0.631301	0.206927	NA	NA	NA	NA	NA	NA
uc001jcp.4	ZFAND4	0.0170547	107	0.830505	0.965786	0.0806577	0.844	0.982718	0.919199	0.210342	0.228832	NA	NA	NA	NA	NA	NA
uc001jcu.3	FAM21C	0.0488326	106	0.541879	0.887537	0.266097	0.61	0.945635	1.15891	0.273332	0.235852	NA	NA	NA	NA	NA	NA
uc001jdc.1	PTPN20B	-0.197431	89	0.0240914	0.475734	-1.61814	0.023	0.580253	5.40237	2.11648	0.391769	NA	NA	NA	NA	NA	NA
uc001jea.3	SYT15	0.115857	94	0.17346	0.69393	0.7608	0.3	0.855207	0.840551	0.26209	0.311807	-0.0564636	0.480677	0.702109	13	0.977978	0.999932
uc001jec.3	GPRIN2	0.159442	112	0.0405376	0.513205	1.39214	0.05	0.650755	1.88239	0.563681	0.299449	-0.0804639	0.378089	0.61927	10	0.792391	0.996489
uc001jee.3	NPY4R	-0.137056	98	0.100001	0.619685	-0.999997	0.101	0.739917	3.11149	0.676309	0.217359	NA	NA	NA	NA	NA	NA
uc001jeh.4	ANXA8	0.21253	82	0.0198854	0.46207	1.70147	0.023	0.580253	0.569574	52.2647	91.761	-0.0761548	0.263051	0.505832	18	0.533	0.980846
uc001jem.3	ANXA8L2	0.246111	74	0.0105235	0.425255	1.97784	0.02	0.571719	1.2287	3.86681	3.14706	NA	NA	NA	NA	NA	NA
uc001jex.3	ZNF488	-0.117293	104	0.14679	0.669896	-0.833304	0.171	0.798465	1.33378	0.514553	0.385785	NA	NA	NA	NA	NA	NA
uc001jez.3	RBP3	-0.106609	101	0.193849	0.709717	-0.712537	0.225	0.83165	1.04995	0.412491	0.392868	-0.00494668	0.952666	0.979228	12	0.810811	0.997631
uc001jfa.1	GDF2	-0.0594335	106	0.45785	0.856273	-0.339277	0.517	0.923684	0.120609	0.205526	1.70407	0.0746006	0.301292	0.546892	16	0.382	0.971468
uc001jfb.3	GDF10	0.0224975	106	0.778695	0.955666	0.108632	0.797	0.975675	0.9196	0.205446	0.223408	0.0993652	0.133528	0.350046	19	0.292	0.966111
uc001jfy.4	FRMPD2P1	0.121393	89	0.165463	0.687675	0.7813	0.144	0.785801	2.44384	0.731471	0.299312	NA	NA	NA	NA	NA	NA
uc001jgi.3	FRMPD2	0.0558274	99	0.500643	0.87474	0.300472	0.53	0.927305	2.41374	0.519371	0.215173	-0.153246	0.0783012	0.258545	11	0.272251	0.962758
uc001jgp.3	MAPK8	0.12122	33	0.408013	0.8316	0.389326	NA	NA	NA	0.371905	NA	-0.139094	0.0823448	0.266599	13	0.195	0.925324
uc001jha.4	WDFY4	-0.00761754	119	0.919613	0.981379	-0.0363951	0.924	0.989275	0.588172	0.201975	0.343394	0.179355	2.05238e-05	0.000929337	47	0.111	0.89294
uc001jhd.3	LRRC18	0.06156	93	0.47195	0.86267	0.326104	0.373	0.881364	1.72595	0.376862	0.21835	0.224655	0.000137646	0.00380593	24	0.062	0.863874
uc001jhf.2	VSTM4	-0.0355648	103	0.661537	0.924718	-0.179446	0.693	0.961978	0.760189	0.236947	0.311695	0.192819	0.000408924	0.00799643	28	0.045	0.850463
uc001jhj.3	FAM170B	0.0506103	112	0.515593	0.879002	0.287693	0.555	0.933305	0.917272	0.204139	0.22255	0.147958	0.0551481	0.207756	14	0.094	0.89294
uc001jhn.4	C10orf128	0.0200552	85	0.822908	0.964207	0.0846489	0.8	0.975675	1.07531	0.244769	0.227626	0.120217	0.0694975	0.240598	19	0.254	0.959755
uc001jhs.5	ERCC6	-0.00972769	116	0.89877	0.978669	-0.0463516	0.909	0.988138	0.65062	0.202403	0.311092	0.101563	0.0301083	0.144836	38	0.286	0.96537
uc001jhw.3	SLC18A3	0.0667629	106	0.404313	0.830607	0.393282	0.482	0.912484	0.972186	0.228489	0.235026	0.122243	0.0422776	0.177076	23	0.217	0.938122
uc001jhz.2	CHAT	0.0923026	110	0.240028	0.740202	0.619739	0.227	0.832082	1.44248	0.292455	0.202744	0.12269	0.0335897	0.155282	25	0.208	0.929628
uc001jid.1	C10orf53	0.154972	47	0.20273	0.718396	0.693082	NA	NA	1.25778	0.367435	0.292129	0.0688822	0.35542	0.597816	15	0.376	0.971468
uc001jie.3	OGDHL	0.0120256	106	0.880596	0.976941	0.0552232	0.9	0.988138	0.651794	0.20547	0.315238	-0.0886378	0.192689	0.426084	18	0.545	0.980846
uc001jif.3	PARG	0.0180258	103	0.824398	0.964812	0.0838632	0.849	0.98295	1.77682	0.372424	0.209601	-0.0811741	0.0652139	0.230587	43	0.376	0.971468
uc001jiq.3	MSMB	-0.0980144	73	0.311686	0.785647	-0.506282	0.357	0.876072	0.33484	0.29779	0.889348	-0.173411	0.0246014	0.126014	14	0.028	0.8222
uc001jiu.4	TIMM23	-0.063389	54	0.575457	0.903341	-0.239987	NA	NA	1.06803	0.292925	0.274266	-0.119205	0.0261736	0.131109	29	0.245	0.957954
uc001jjb.3	FAM21A	-0.0420241	108	0.596147	0.908769	-0.224647	0.647	0.953665	0.131462	0.236398	1.79822	NA	NA	NA	NA	NA	NA
uc001jjd.3	ASAH2	-0.00511245	115	0.946928	0.985786	-0.0236831	0.951	0.9914	0.771009	0.200879	0.26054	NA	NA	NA	NA	NA	NA
uc001jje.3	SGMS1	0.13408	82	0.141836	0.663102	0.848214	0.147	0.787424	0.375208	0.264471	0.704865	-0.108236	0.0935954	0.287331	20	0.456	0.971468
uc001jjg.4	ASAH2B	0.0542912	90	0.532735	0.884272	0.273489	0.538	0.927524	0.900044	0.234697	0.260762	0.0112859	0.901609	0.954359	10	0.964637	0.999167
uc001jjj.3	A1CF	0.0470703	99	0.570146	0.899267	0.244014	0.541	0.927524	1.06925	0.230923	0.215967	-0.0322241	0.645345	0.812985	17	0.604	0.984961
uc001jjo.3	PRKG1	-0.139621	47	0.251118	0.747372	-0.600122	NA	NA	1.16837	0.364904	0.312319	-0.132322	2.16085e-10	5.90389e-08	192	0.039	0.850463
uc001jjp.3	CSTF2T	-0.0308013	99	0.71021	0.938604	-0.148613	0.777	0.973374	0.999574	0.211744	0.211834	-0.117476	0.0379918	0.166421	26	0.11	0.89294
uc001jjr.3	DKK1	-0.0410631	85	0.646777	0.921932	-0.189246	0.663	0.955853	1.04609	0.252469	0.241344	-0.195807	3.69666e-05	0.00141956	37	0.026	0.805308
uc001jjt.3	MBL2	-0.0679283	93	0.427358	0.839397	-0.369208	0.482	0.912484	1.39051	0.302944	0.217866	-0.208001	0.0125619	0.0801335	12	0.048	0.851274
uc001jka.1	ZWINT	-0.138127	97	0.0991382	0.618557	-1.00376	0.077	0.705036	1.79348	0.630907	0.351778	NA	NA	NA	NA	NA	NA
uc001jkb.3	IPMK	0.0268961	95	0.750708	0.949116	0.124529	0.749	0.971263	0.944283	0.215779	0.228511	-0.0551719	0.490772	0.708501	13	0.934	0.999167
uc001jkc.5	CISD1	-0.138049	69	0.166287	0.688301	-0.779141	0.201	0.817764	0.88661	0.516122	0.582129	-0.085756	0.303456	0.548213	12	0.677031	0.98782
uc001jke.2	UBE2D1	NA	NA	NA	NA	NA	NA	NA	NA	NA	1.01712	-0.166173	0.00480329	0.0432402	24	0.15	0.904319
uc001jkf.4	TFAM	-0.071151	95	0.400651	0.828884	-0.397234	0.57	0.938566	0.469241	0.322857	0.688041	-0.136186	0.012553	0.0801084	28	0.155	0.90469
uc001jki.1	BICC1	-0.108411	102	0.184216	0.700609	-0.734672	0.254	0.845664	0.657783	0.495688	0.753573	-0.125487	8.29073e-05	0.00258504	82	0.019	0.788781
uc001jkk.4	PHYHIPL	0.138501	61	0.192475	0.708614	0.715625	0.215	0.82752	1.05754	0.299625	0.283322	-0.155826	0.00164753	0.0214338	34	0.006	0.71668
uc001jkn.3	FAM13C	0.00898521	110	0.908942	0.979717	0.0414636	0.906	0.988138	0.46155	0.202548	0.438842	-0.152897	0.00318998	0.0329421	31	0.027	0.811364
uc001jks.4	CCDC6	-0.00718119	59	0.947043	0.985786	-0.0236305	0.953	0.9914	1.10507	0.292622	0.264801	-0.114317	0.102526	0.302655	17	0.141	0.90025
uc001jky.3	ANK3	-0.00649374	120	0.931149	0.983038	-0.0309809	0.946	0.989978	0.729911	0.194622	0.266637	-0.108392	2.51018e-05	0.00108706	126	0.047	0.851229
uc001jld.3	CDK1	0.00992706	45	0.936423	0.983438	0.0285279	NA	NA	1.02108	0.325792	0.319065	-0.0816688	0.109535	0.314772	32	0.188	0.92064
uc001jlh.3	RHOBTB1	0.0380044	103	0.639911	0.920493	0.19388	0.638	0.952381	0.732133	0.214268	0.292662	-0.0586179	0.0554455	0.208389	89	0.286	0.96537
uc001jlo.2	TMEM26	0.0406552	104	0.615018	0.9134	0.211112	0.659	0.955328	0.982827	0.207215	0.210836	-0.0483819	0.170153	0.398441	67	0.301	0.968161
uc001jlt.2	ARID5B	-0.0666527	116	0.383392	0.822083	-0.416356	0.423	0.897682	1.396	0.275651	0.197458	-0.0567309	0.00174367	0.0223079	254	0.39	0.971468
uc001jlw.3	RTKN2	-0.0983267	113	0.204492	0.720413	-0.689324	0.253	0.844881	0.763203	0.556591	0.729283	-0.131566	0.00314243	0.0326391	42	0.214	0.936058
uc001jmc.2	ZNF365	-0.0122942	105	0.878534	0.976446	-0.0562416	0.877	0.986458	0.388341	0.222132	0.572003	-0.122322	3.15947e-06	0.000228388	121	0.019	0.788781
uc001jmg.3	ADO	-0.0755574	84	0.401979	0.829447	-0.395797	0.426	0.897682	1.34063	0.307117	0.229084	-0.0752712	0.0221517	0.116679	77	0.182	0.919505
uc001jmi.3	EGR2	-0.170952	90	0.0494908	0.533066	-1.30548	0.04	0.63642	5.26736	1.16293	0.22078	-0.1006	0.00182967	0.0228636	80	0.089	0.89294
uc001jmj.4	NRBF2	0.00916324	93	0.914734	0.98036	0.0387053	0.908	0.988138	0.9636	0.227704	0.236306	-0.0760434	0.206489	0.441109	23	0.312	0.971468
uc001jmn.3	JMJD1C	-0.148798	116	0.0516634	0.533702	-1.28682	0.1	0.739245	1.33856	0.809994	0.605123	-0.0934037	0.0282122	0.1388	46	0.34	0.971468
uc001jmt.3	REEP3	-0.141034	81	0.124662	0.644739	-0.904267	0.15	0.787424	1.48439	0.51398	0.346255	-0.0804412	0.0488113	0.193566	50	0.205	0.926002
uc001jmw.2	CTNNA3	0.00132117	102	0.987089	0.997569	0.00564379	0.994	1	0.97993	0.212256	0.216603	-0.0501094	0.0050608	0.044337	261	0.204	0.925868
uc001jmz.1	LRRTM3	0.0508432	57	0.644116	0.920763	0.191036	0.662	0.955853	0.875862	0.267975	0.305956	-0.0617922	0.0446731	0.182914	88	0.228	0.946341
uc001jnb.3	DNAJC12	-0.0313083	96	0.710037	0.938508	-0.148719	0.707	0.965794	0.972486	0.223518	0.229841	NA	NA	NA	NA	NA	NA
uc001jnd.3	SIRT1	-0.0972557	107	0.222216	0.728768	-0.653225	0.222	0.830411	0.455943	0.340855	0.747583	NA	NA	NA	NA	NA	NA
uc001jng.4	HERC4	0.0298473	90	0.731627	0.944379	0.13571	0.757	0.971778	0.533405	0.259354	0.486223	-0.113279	0.0959523	0.29184	18	0.094	0.89294
uc001jnm.5	MYPN	0.033686	114	0.662362	0.924718	0.178905	0.655	0.95481	0.728138	0.199565	0.274075	-0.142901	0.00446171	0.0411693	33	0.075	0.890991
uc001jnq.3	ATOH7	-0.0164604	79	0.859563	0.972672	-0.0657222	0.882	0.987128	1.04634	0.289213	0.276404	-0.142164	0.0138067	0.0855686	25	0.085	0.89294
uc001jns.1	PBLD	0.0490365	107	0.538253	0.886545	0.269014	0.576	0.939039	1.02312	0.213507	0.208683	-0.139453	0.0157227	0.0932143	25	0.117	0.89294
uc001jnw.4	HNRNPH3	-0.0075836	24	0.965189	0.991222	-0.0153879	NA	NA	0.989776	0.385118	0.389097	-0.112483	0.0983108	0.296005	18	0.242	0.957761
uc001job.3	RUFY2	0.0123639	84	0.890918	0.978669	0.0501622	0.881	0.987008	1.00372	0.228997	0.228149	-0.115281	0.110191	0.315528	16	0.29	0.966111
uc001joi.3	SLC25A16	-0.0951139	75	0.319506	0.789067	-0.495521	NA	NA	1.46045	0.363342	0.248788	-0.125602	0.0919724	0.284336	15	0.371	0.971468
uc001jok.4	TET1	-0.277864	120	0.000218166	0.204553	-3.66121	0.003	0.34114	20.2192	28.6161	1.41529	-0.178824	0.00560157	0.047172	20	0.125	0.89294
uc001joo.3	CCAR1	-0.0408416	86	0.646587	0.921932	-0.189373	0.701	0.96365	0.991099	0.248815	0.25105	-0.171693	0.0600037	0.219134	10	0.0443599	0.850463
uc001joq.3	STOX1	-0.231788	117	0.00233057	0.299334	-2.63254	0.01	0.507049	4.58736	8.28064	1.8051	NA	NA	NA	NA	NA	NA
uc001jou.3	DDX50	-0.0118745	92	0.890252	0.978603	-0.0504873	0.939	0.989861	1.06103	0.234231	0.220759	0.00331461	0.971036	0.985636	10	0.840654	0.999167
uc001jov.2	DDX21	-0.0407363	113	0.599109	0.90945	-0.222494	0.675	0.955853	1.59039	0.332866	0.209298	NA	NA	NA	NA	NA	NA
uc001joy.3	KIAA1279	-0.0548534	92	0.523854	0.881287	-0.280789	0.58	0.939039	0.771576	0.282568	0.366222	NA	NA	NA	NA	NA	NA
uc001joz.3	SRGN	-0.0821296	95	0.331975	0.793759	-0.478894	0.347	0.874666	0.41966	0.313108	0.746098	NA	NA	NA	NA	NA	NA
uc001jpb.3	VPS26A	0.0424278	32	0.77572	0.954795	0.110295	NA	NA	0.937335	0.342323	0.365209	NA	NA	NA	NA	NA	NA
uc001jpe.1	SUPV3L1	-0.0504289	108	0.524816	0.88175	-0.279993	0.529	0.926919	1.34954	0.274966	0.203747	NA	NA	NA	NA	NA	NA
uc001jpf.4	HKDC1	-0.0350387	108	0.658591	0.92467	-0.181384	0.72	0.966562	1.16107	0.236659	0.203828	NA	NA	NA	NA	NA	NA
uc001jpi.4	HK1	-0.000453691	106	0.995478	1	-0.00196819	0.993	1	0.707191	0.206442	0.291918	NA	NA	NA	NA	NA	NA
uc001jpn.2	TACR2	0.165907	107	0.0373153	0.511258	1.42811	0.085	0.719499	0.0159551	3.71357	232.752	NA	NA	NA	NA	NA	NA
uc001jpo.1	TSPAN15	0.031103	92	0.71778	0.94164	0.144009	0.72	0.966562	1.04654	0.233432	0.223051	-0.0811454	0.168504	0.396306	24	0.574	0.982174
uc001jpp.3	NEUROG3	-0.0136716	94	0.87239	0.975278	-0.0592892	0.876	0.986458	0.999791	0.216848	0.216893	-0.0182564	0.742458	0.871445	27	0.948	0.999167
uc001jpq.4	C10orf35	-0.105988	70	0.284326	0.765935	-0.546184	0.361	0.876431	1.45988	0.37187	0.254727	0.0175123	0.735554	0.86713	31	0.481	0.97649
uc001jql.3	COL13A1	0.0795378	109	0.31358	0.786897	0.503652	0.278	0.84933	1.62814	0.331044	0.203327	-0.0327152	0.462702	0.688395	42	0.763	0.993422
uc001jqm.3	H2AFY2	0.0653606	51	0.575091	0.903266	0.240264	0.58	0.939039	0.510411	0.307279	0.602023	-0.0242928	0.713767	0.85619	19	0.865	0.999167
uc001jqp.2	AIFM2	0.120901	104	0.134759	0.656192	0.870443	0.148	0.787424	0.810998	0.402994	0.496911	-0.0229048	0.78343	0.894075	12	0.722	0.990078
uc001jqr.4	TYSND1	0.132337	84	0.142132	0.663647	0.847307	0.163	0.793077	1.5298	0.419346	0.274118	0.0128216	0.888304	0.948245	10	0.971631	0.999401
uc001jqv.1	PPA1	0.0225845	83	0.803377	0.959409	0.0950806	0.811	0.976661	1.01699	0.232951	0.229059	NA	NA	NA	NA	NA	NA
uc001jrb.3	EIF4EBP2	0.172235	28	0.281466	0.762953	0.550575	NA	NA	0.894884	0.358079	0.40014	-0.027381	0.753082	0.877018	11	0.787575	0.995716
uc001jrc.2	NODAL	-0.0989173	107	0.214417	0.724458	-0.668741	0.267	0.848573	1.42853	0.326987	0.228897	-0.027381	0.753082	0.877018	11	0.787575	0.995716
uc001jrd.4	PALD1	-0.00745667	109	0.924731	0.981412	-0.0339844	0.929	0.989275	0.707424	0.203138	0.287152	0.000799793	0.992343	0.995802	12	0.876	0.999167
uc001jrf.4	PRF1	-0.0293643	114	0.703474	0.936468	-0.152752	0.72	0.966562	1.35173	0.282943	0.209319	NA	NA	NA	NA	NA	NA
uc001jrg.3	ADAMTS14	-0.0342271	116	0.654434	0.92318	-0.184134	0.708	0.966052	1.00905	0.237239	0.235112	0.0859813	0.346264	0.588981	10	0.988421	0.999932
uc001jrj.1	TBATA	-0.0689195	108	0.384783	0.822534	-0.414784	0.421	0.897682	1.22659	0.260842	0.212656	NA	NA	NA	NA	NA	NA
uc001jrm.3	SGPL1	-0.0336193	108	0.671595	0.928204	-0.172892	0.65	0.95463	1.16103	0.966347	0.832317	0.0563507	0.481555	0.702836	13	0.893	0.999167
uc001jrn.1	PCBD1	0.0266369	30	0.862789	0.973525	0.0640955	NA	NA	4.3043e-09	5.03112	1.16886e+09	0.0319367	0.689981	0.84017	13	0.901	0.999167
uc001jro.3	UNC5B	0.0504872	110	0.520451	0.881196	0.28362	0.524	0.926321	0.859491	0.208654	0.242764	-0.0155878	0.702618	0.847897	50	0.647	0.985384
uc001jrr.4	SLC29A3	0.0043821	115	0.954501	0.988561	0.0202237	0.971	0.995592	0.916912	0.205164	0.223756	-0.0275977	0.507784	0.722475	48	0.648	0.985975
uc001jrx.4	CDH23	0.242925	121	0.00117125	0.283041	2.93135	0.037	0.627182	7.28377	28.2702	3.88125	0.0756713	0.00947105	0.0664953	98	0.388	0.971468
uc001jsa.2	C10orf105	0.0482748	104	0.550386	0.891618	0.259333	0.558	0.933723	0.38337	0.241012	0.628666	0.122163	0.030948	0.147642	26	0.156	0.906915
uc001jsd.3	C10orf54	-0.0498815	101	0.543241	0.888007	-0.265007	0.586	0.939686	0.695066	0.236028	0.339576	0.1631	0.00962454	0.0673467	21	0.069	0.871064
uc001jsm.3	PSAP	-0.041877	110	0.593998	0.908138	-0.226215	0.648	0.953957	1.32502	0.271577	0.204961	NA	NA	NA	NA	NA	NA
uc001jsn.3	CHST3	-0.0181047	99	0.827112	0.964812	-0.0824359	0.8	0.975675	1.02659	0.223293	0.21751	0.121558	0.0921209	0.284535	16	0.175	0.919505
uc001jso.2	SPOCK2	0.0491628	90	0.572136	0.90089	0.2425	0.588	0.939686	0.512903	0.222907	0.434599	0.154561	0.0102386	0.0699348	23	0.056	0.863874
uc001jst.2	ASCC1	-0.114655	100	0.164452	0.686373	-0.783961	0.13	0.776485	2.08577	0.490403	0.235119	0.0306517	0.486289	0.705629	43	0.826	0.997631
uc001jsx.1	DDIT4	-0.00623111	75	0.948002	0.986284	-0.0231905	0.961	0.993507	1.06104	0.254542	0.239899	-0.0540043	0.331034	0.575091	27	0.377	0.971468
uc001jta.2	DNAJB12	0.0782819	94	0.357725	0.811025	0.446451	0.342	0.873642	0.392038	0.345009	0.88004	0.018703	0.74599	0.873055	25	0.675	0.98782
uc001jtb.2	MICU1	-0.0141377	92	0.869507	0.974449	-0.0607272	0.87	0.984888	1.392	0.304393	0.218673	-0.0245914	0.599517	0.785581	38	0.447	0.971468
uc001jtc.3	MCU	0.0881787	70	0.373066	0.817831	0.428215	0.454	0.907824	0.999048	0.246404	0.246639	-0.0800668	0.128741	0.343083	30	0.063	0.865208
uc001jte.1	OIT3	-0.127101	105	0.114109	0.63287	-0.94268	0.137	0.783545	1.1673	0.459206	0.39339	-0.047994	0.59907	0.785378	10	0.915306	0.999167
uc001jtf.1	PLA2G12B	0.0265066	82	0.771503	0.953629	0.112662	0.744	0.970716	0.886055	0.255866	0.28877	-0.0740491	0.417278	0.65133	10	0.574037	0.982174
uc001jtg.3	P4HA1	-0.0039855	83	0.964954	0.991222	-0.0154933	0.958	0.993232	0.998705	0.228694	0.228991	-0.0959168	0.198155	0.432124	15	0.12	0.89294
uc001jtj.3	NUDT13	0.0367952	100	0.655479	0.923552	0.183441	0.669	0.955853	0.227999	0.245554	1.07699	-0.145013	0.0701146	0.241877	13	0.034	0.832569
uc001jtn.3	ECD	-0.0526894	105	0.512482	0.877828	-0.290322	0.443	0.905436	0.809187	0.237176	0.293105	-0.145013	0.0701146	0.241877	13	0.034	0.832569
uc001jtr.3	DNAJC9	-0.040843	95	0.629486	0.918606	-0.201014	0.607	0.944297	1.03139	0.238688	0.231423	NA	NA	NA	NA	NA	NA
uc001jts.1	MRPS16	-0.0589623	79	0.526227	0.882568	-0.278827	0.444	0.905436	1.12021	0.278009	0.248177	NA	NA	NA	NA	NA	NA
uc001jtz.2	ANXA7	0.126678	107	0.11185	0.632315	0.951363	0.126	0.774157	0.20233	0.757863	3.74568	-0.215626	0.000340831	0.00707605	23	0.013	0.782772
uc001jud.3	MSS51	0.140886	105	0.0798861	0.594854	1.09753	0.05	0.650755	10.695	5.8099	0.543237	-0.215626	0.000340831	0.00707605	23	0.013	0.782772
uc001juf.3	PPP3CB	-0.020185	35	0.886974	0.978069	-0.052089	NA	NA	NA	0.349003	NA	-0.167763	0.000408121	0.00799643	37	0.014	0.788781
uc001juo.3	USP54	-0.0227071	118	0.764522	0.951788	-0.11661	0.788	0.975371	0.805017	0.214859	0.266899	-0.1608	0.00036182	0.00743493	41	0.011	0.782772
uc001jur.4	MYOZ1	0.123722	95	0.143893	0.666738	0.841959	0.112	0.756037	0.112621	0.505342	4.48711	-0.0967712	0.14397	0.364305	19	0.154	0.90469
uc001jut.4	SYNPO2L	-0.108957	114	0.157845	0.680723	-0.801769	0.203	0.817764	1.73458	0.376134	0.216844	-0.119231	0.0718145	0.245421	19	0.072	0.879994
uc001jux.3	SEC24C	0.127196	110	0.10543	0.627481	0.977036	0.138	0.784457	1.27504	0.643073	0.504355	-0.0625877	0.181411	0.411896	38	0.526	0.980846
uc001jva.3	FUT11	-0.119442	103	0.14148	0.662143	-0.849305	0.15	0.787424	0.124871	0.924587	7.40435	-0.0572574	0.198675	0.432614	42	0.624	0.985384
uc001jvc.4	CHCHD1	-0.140476	87	0.112647	0.63287	-0.94828	0.189	0.808991	0.550094	0.537306	0.976754	-0.0522635	0.235183	0.475379	43	0.678	0.98782
uc001jvj.3	ZSWIM8	-0.131379	102	0.107569	0.630411	-0.968312	0.15	0.787424	1.31099	0.694242	0.529555	-0.0253227	0.535109	0.741648	50	0.857	0.999167
uc001jvk.2	NDST2	0.0572227	99	0.489999	0.870462	0.309805	0.512	0.921993	0.820074	0.250408	0.305348	-0.00352604	0.928486	0.968499	54	0.923	0.999167
uc001jvm.2	CAMK2G	-0.00596762	40	0.964041	0.991061	-0.0159046	NA	NA	0.00909295	0.398111	43.7824	0.0306245	0.403583	0.640897	62	0.545	0.980846
uc001jvz.2	C10orf55	-0.102209	100	0.215219	0.724458	-0.66712	0.195	0.81307	0.459608	0.321505	0.699521	0.0379669	0.285355	0.527938	66	0.428	0.971468
uc001jwa.3	PLAU	0.0939363	110	0.231809	0.736758	0.634871	0.228	0.833035	1.1012	0.268875	0.244165	0.0379669	0.285355	0.527938	66	0.428	0.971468
uc001jwd.3	VCL	-0.0398474	84	0.658494	0.924604	-0.181448	0.689	0.960118	0.786356	0.235356	0.2993	-0.0260981	0.522681	0.732153	50	0.621	0.984961
uc001jwh.3	AP3M1	0.0491363	43	0.69983	0.935525	0.155007	NA	NA	0.586233	0.303323	0.517411	-0.146912	0.010944	0.0733542	25	0.029	0.826814
uc001jwi.3	ADK	0.0731573	95	0.387501	0.823786	0.411727	0.417	0.897236	1.33701	0.319482	0.238952	-0.0678282	0.0114012	0.0755686	116	0.127	0.89294
uc001jwn.2	KAT6B	-0.132945	116	0.0821028	0.596598	-1.08564	0.169	0.798041	2.0913	0.530256	0.253553	-0.149254	4.96553e-09	1.0965e-06	128	0.01	0.782772
uc001jwq.1	DUPD1	-0.0249961	97	0.765384	0.951838	-0.116121	0.757	0.971778	0.415388	0.23063	0.555216	-0.148548	1.45459e-05	0.000697857	71	0.013	0.782772
uc001jwu.3	DUSP13	-0.0740904	111	0.343409	0.803538	-0.464188	0.406	0.889977	0.168104	0.271316	1.61398	-0.0961175	0.0375985	0.165643	39	0.119	0.89294
uc001jwx.2	SAMD8	0.0437545	74	0.649257	0.922257	0.187583	0.665	0.955853	0.750034	0.247677	0.330222	-0.0703923	0.13803	0.357436	37	0.199	0.925324
uc001jxb.3	COMTD1	-0.1482	94	0.0816564	0.596598	-1.08801	0.063	0.679425	2.29647	0.73139	0.318484	0.0850515	0.253846	0.496422	15	0.368	0.971468
uc001jxg.3	ZNF503	0.0327133	75	0.732064	0.944391	0.135451	0.738	0.969601	1.05501	0.288969	0.273901	0.0654627	0.0765694	0.255187	61	0.356	0.971468
uc001jxi.3	C10orf11	-0.117052	84	0.194166	0.709736	-0.711828	0.18	0.805747	0.867259	0.489561	0.564492	0.0558687	1.79524e-06	0.000157279	610	0.489	0.97649
uc001jxn.3	KCNMA1	0.169844	71	0.0839429	0.600273	1.07602	0.116	0.760466	0.600347	0.644185	1.07302	0.0656149	0.000160372	0.00417641	276	0.379	0.971468
uc001jzk.3	DLG5	-0.0455317	114	0.555054	0.893806	-0.255665	0.582	0.939686	0.961158	0.225455	0.234566	-0.102023	0.186055	0.41712	14	0.235	0.953785
uc001jzm.1	AK125684	-0.0798636	73	0.409746	0.831666	-0.387485	NA	NA	1.35509	0.330696	0.24404	NA	NA	NA	NA	NA	NA
uc001jzn.3	POLR3A	-0.00715479	92	0.933739	0.983206	-0.0297743	0.943	0.989869	0.474916	0.241202	0.507883	-0.0104214	0.862552	0.936476	23	0.671	0.98782
uc001jzs.3	RPS24	-0.177187	73	0.0674146	0.569056	-1.17125	NA	NA	1.1605	1.00002	0.861711	0.0778272	0.206052	0.440584	22	0.636	0.985384
uc001kaf.2	ZMIZ1	-0.0171165	82	0.851245	0.970418	-0.0699456	0.862	0.984178	0.822695	0.250037	0.303924	0.0278901	0.30237	0.54754	114	0.605	0.984961
uc001kai.3	PPIF	0.107665	79	0.24716	0.744807	0.607022	0.271	0.84933	0.943059	0.313364	0.332285	-0.0825513	0.0954428	0.290729	34	0.522	0.980846
uc001kak.3	ZCCHC24	-0.0217752	38	0.87278	0.97535	-0.0590952	NA	NA	1.00127	0.315399	0.314999	-0.0685364	0.209031	0.444243	28	0.624	0.985384
uc001kal.4	SFTPA2	0.0459542	55	0.681895	0.929957	0.166282	NA	NA	0.449696	0.272638	0.606272	NA	NA	NA	NA	NA	NA
uc001kbh.3	SFTPD	-0.0145137	106	0.856138	0.971329	-0.067456	0.876	0.986458	0.90543	0.207561	0.22924	NA	NA	NA	NA	NA	NA
uc001kbp.1	PLAC9	0.0229686	79	0.804997	0.9602	0.0942058	0.825	0.979323	0.761454	0.246271	0.323422	NA	NA	NA	NA	NA	NA
uc001kbt.1	ANXA11	0.328289	100	6.87126e-05	0.179321	4.16296	0	0	25.495	45.1965	1.77276	NA	NA	NA	NA	NA	NA
uc001kbw.3	MAT1A	0.151694	95	0.0731557	0.580777	1.13575	0.072	0.695056	4.94602	1.75059	0.35394	NA	NA	NA	NA	NA	NA
uc001kce.4	FAM213A	0.157008	97	0.0608677	0.55143	1.21561	0.048	0.650755	2.09824	0.473432	0.225632	NA	NA	NA	NA	NA	NA
uc001kcj.4	TSPAN14	0.0488941	44	0.697801	0.934574	0.156268	NA	NA	0.808076	0.297489	0.368144	0.196905	0.0236839	0.122484	11	0.0735887	0.886296
uc001kck.1	SH2D4B	0.180958	99	0.0290359	0.492435	1.53706	0.033	0.6186	2.57444	0.550972	0.214016	0.161441	0.0176629	0.10061	18	0.087	0.89294
uc001kco.2	NRG3	0.0202339	94	0.812097	0.961877	0.0903923	0.848	0.98295	0.892838	0.226847	0.254074	0.0889186	0.000146684	0.00398744	152	0.258	0.959755
uc001kcs.1	GHITM	0.0497677	103	0.540124	0.887537	0.267507	0.563	0.936315	0.293541	0.221934	0.756059	-0.0549277	0.547379	0.74949	10	0.736419	0.990245
uc001kcu.3	C10orf99	-0.0339641	93	0.691471	0.933299	-0.160226	0.688	0.960022	0.62422	0.242362	0.388264	NA	NA	NA	NA	NA	NA
uc001kcv.3	CDHR1	0.160854	115	0.0362287	0.511258	1.44095	0.054	0.663312	2.88447	1.0263	0.355801	NA	NA	NA	NA	NA	NA
uc001kcy.3	LRIT2	0.0998866	99	0.228207	0.733275	0.64167	0.253	0.844881	1.88805	0.436239	0.231053	NA	NA	NA	NA	NA	NA
uc001kcz.1	LRIT1	0.0434425	110	0.580278	0.904264	0.236364	0.636	0.951877	1.18731	0.247906	0.208797	NA	NA	NA	NA	NA	NA
uc001kdd.1	RGR	0.0942291	101	0.250806	0.747372	0.600663	0.291	0.85091	0.95758	0.303459	0.316902	NA	NA	NA	NA	NA	NA
uc001kdh.1	CCSER2	-0.0074361	110	0.92459	0.981395	-0.034051	0.926	0.989275	0.911872	0.20226	0.221807	-0.0154416	0.81564	0.910153	19	0.749	0.992102
uc001kdl.1	GRID1	0.143999	86	0.105962	0.628203	0.974848	0.133	0.778813	1.53895	0.392378	0.254964	0.1536	2.71986e-09	6.44767e-07	125	0.105	0.89294
uc001kdo.3	WAPAL	0.0292439	114	0.704633	0.936951	0.152037	0.719	0.966562	0.716292	0.199456	0.278456	NA	NA	NA	NA	NA	NA
uc001kdp.3	OPN4	0.0236883	110	0.763012	0.951788	0.117469	0.801	0.975675	0.996779	0.269549	0.27042	0.208172	0.00522452	0.0451683	15	0.049	0.853977
uc001kdv.3	LDB3	0.00156678	113	0.983869	0.996633	0.0070627	0.987	0.999081	0.987662	0.199684	0.202179	0.174034	0.0195511	0.10797	15	0.071	0.879994
uc001kdy.3	BMPR1A	-0.0327133	75	0.732064	0.944391	-0.135451	0.732	0.969128	1.14851	0.302022	0.262969	0.119902	0.0780458	0.258177	18	0.201	0.925324
uc001kea.3	MMRN2	-0.0757252	112	0.33066	0.793759	-0.480619	0.429	0.899104	0.295208	0.213579	0.723486	NA	NA	NA	NA	NA	NA
uc001keb.2	SNCG	0.233453	85	0.00918157	0.407028	2.03708	0.006	0.459356	22.6913	22.0858	0.973316	NA	NA	NA	NA	NA	NA
uc001kec.1	AL157440	-0.095561	60	0.372615	0.817704	-0.428739	NA	NA	1.32921	0.467559	0.351757	NA	NA	NA	NA	NA	NA
uc001ked.2	ADIRF	-0.0479443	64	0.643742	0.920736	-0.191288	NA	NA	1.07987	0.285058	0.263975	NA	NA	NA	NA	NA	NA
uc001keh.3	GLUD1	-0.0879662	80	0.341274	0.802155	-0.466897	0.306	0.857299	0.619496	0.325419	0.525296	NA	NA	NA	NA	NA	NA
uc001kei.4	FAM35A	-0.0818195	110	0.297653	0.776133	-0.526289	0.347	0.874666	0.214099	0.279416	1.30508	NA	NA	NA	NA	NA	NA
uc001keu.3	MINPP1	-0.162439	99	0.0500435	0.533066	-1.30065	0.046	0.647307	2.56865	0.661227	0.257422	NA	NA	NA	NA	NA	NA
uc001kex.3	PAPSS2	0.228184	104	0.00476141	0.349258	2.32226	0.013	0.531865	5.73875	8.41054	1.46557	NA	NA	NA	NA	NA	NA
uc001kez.1	ATAD1	-0.231249	34	0.108809	0.63071	-0.963333	NA	NA	1.67545	0.629103	0.375482	-0.139022	0.0621643	0.22388	15	0.106	0.89294
uc001kfb.3	PTEN	-0.0331618	33	0.820931	0.963984	-0.0856934	NA	NA	0.351777	0.337323	0.958911	-0.133845	0.00984104	0.0684668	31	0.113	0.89294
uc001kfe.3	RNLS	0.00245051	110	0.975116	0.993948	0.0109437	0.978	0.997808	0.99869	0.202147	0.202412	-0.135487	7.65646e-07	8.27961e-05	111	0.116	0.89294
uc001kff.3	LIPJ	-0.00327111	104	0.967722	0.991877	-0.0142492	0.977	0.997182	1.40859	0.291938	0.207255	-0.134514	0.0711305	0.243911	15	0.189	0.921061
uc001kfj.4	ANKRD22	0.156464	91	0.0706007	0.576722	1.15119	0.118	0.764824	2.04081	0.499781	0.244894	NA	NA	NA	NA	NA	NA
uc001kfk.4	STAMBPL1	-0.0242387	96	0.773461	0.954459	-0.111561	0.818	0.976938	1.04444	0.226904	0.217249	NA	NA	NA	NA	NA	NA
uc001kfp.3	ACTA2	NA	NA	NA	NA	NA	NA	NA	NA	0.586644	NA	-0.0891657	0.328696	0.57251	10	0.947475	0.999167
uc001kfr.3	FAS	-0.128804	101	0.116469	0.637071	-0.933789	0.219	0.829829	1.34053	0.587771	0.438461	NA	NA	NA	NA	NA	NA
uc001kfz.3	CH25H	-0.210101	96	0.0125929	0.431228	-1.89987	0.02	0.571719	4.8117	2.3548	0.489391	NA	NA	NA	NA	NA	NA
uc001kgg.3	IFIT3	-0.100241	105	0.212734	0.724458	-0.672164	0.225	0.83165	0.0492117	0.228813	4.64958	NA	NA	NA	NA	NA	NA
uc001kgh.3	IFIT1B	-0.00100896	99	0.990289	0.998522	-0.00423818	0.987	0.999081	0.989921	0.21744	0.219654	NA	NA	NA	NA	NA	NA
uc001kgi.4	IFIT1	-0.0530291	105	0.509767	0.877828	-0.292629	0.593	0.940921	1.34172	0.284061	0.211715	NA	NA	NA	NA	NA	NA
uc001kgm.3	SLC16A12	-0.163203	110	0.0377642	0.511258	-1.42292	0.047	0.649558	4.77106	1.00891	0.211464	-0.325505	0.000362936	0.00744342	10	0.0010142	0.419228
uc001kgp.2	PANK1	0.109309	97	0.191893	0.707366	0.716942	0.195	0.81307	2.50396	0.535643	0.213918	-0.128433	0.0666044	0.234067	17	0.233	0.952382
[truncated: 17,151 more rows]
