# Supplementary material for: Complementary evolution of coding and noncoding sequence underlies mammalian hairlessness
Source: eLife. 2022 Nov 7;11:e76911. doi: 10.7554/eLife.76911 (PMC9803358; doi:10.7554/eLife.76911)
Supplement: Figure 1—source data 3. — Conserved noncoding element RERconverge results. [file elife-76911-fig1-data3.csv]

	Rho	N	P	p.adj	permPval	permPadj
chr1cre8	0.0584818490760868	57	0.665656693899634	0.957561510549199	0.628256513026052	0.891421364792808
chr1cre10	-0.200378429855898	54	0.146278997814292	0.807252927183443	0.0793969849246231	0.449774810120612
chr1cre14	0.172285171796927	36	0.315008465821382	0.886524761466403	0.204353083434099	0.632465689218903
chr1cre18	0.155188057959797	31	0.40450038069785	0.913839197891527	0.312295973884657	0.726058112091681
chr1cre22	0.0594528021997357	60	0.651822752599829	0.954365625755465	0.801801801801802	0.949399572135032
chr1cre24	-0.0777946621322104	46	0.607330045755234	0.949207978124704	0.547642928786359	0.859418167359413
chr1cre25	-0.277557279634783	47	0.0589054856515449	0.753478616984927	0.0221105527638191	0.265409573168411
chr1cre50	-0.27277236279499	29	0.152251498791046	0.811179623881527	0.124223602484472	0.530150051918371
chr1cre52	0.196741015805813	47	0.185016631414608	0.835698334092435	0.176884422110553	0.600195477447217
chr1cre57	-0.277885007188364	41	0.0785542204053116	0.769946194941427	0.0304878048780488	0.306460939109317
chr1cre61	-0.204159154947519	54	0.138660014174939	0.804430477608438	0.242728184553661	0.669488506960802
chr1cre79	-0.0919097842855071	36	0.593945375886425	0.948462634122207	0.583516483516484	0.873954258285392
chr1cre84	-0.0237467845072989	39	0.885900246298427	0.98808946439769	0.882892057026477	0.972319897935996
chr1cre88	0.101454460802991	58	0.4485749993997	0.92088242312396	0.407407407407407	0.78780905106165
chr1cre92	0.114013475741524	72	0.340276451116073	0.89696246842236	0.325	0.73476622121505
chr1cre99	0.129111648819808	42	0.415125796853276	0.915510797387374	0.407482305358948	0.78780905106165
chr1cre100	-0.187654164979767	50	0.191898999046548	0.838161300292811	0.195586760280843	0.622418124795207
chr1cre102	-0.202156147080893	61	0.118192442170584	0.789029528886147	0.046	0.361172642176226
chr1cre106	-0.1571679178012	56	0.247347333412679	0.865845722841647	0.219	0.647315138681933
chr1cre110	0.182606692589668	53	0.190625031112103	0.838161300292811	0.107	0.503057797859955
chr1cre117	0.139286847377772	38	0.40427189468565	0.913535318671315	0.401215805471125	0.784159326818991
chr1cre121	0.232007855148353	52	0.0979181493324658	0.780345632291252	0.0871743486973948	0.465305723565339
chr1cre136	-0.112358923338234	81	0.317949877921715	0.888245693856186	0.313	0.726278019482296
chr1cre144	-0.0421974736284861	53	0.764169084585143	0.971987322939362	0.678427419354839	0.910542795695524
chr1cre145	-0.0441169768376013	52	0.756142889601818	0.970876763517905	0.742742742742743	0.931508534214475
chr1cre146	-0.168642005592972	33	0.348160466439992	0.898087081252259	0.322515212981744	0.733063777114641
chr1cre158	-0.182409860946146	54	0.186776277068462	0.835698334092435	0.105846774193548	0.501358302191979
chr1cre164	-0.0334589784526671	42	0.833391504754477	0.981512244326894	0.81025641025641	0.95202342598763
chr1cre165	0	42	1	1	0.987891019172553	0.99655824603243
chr1cre202	0.073581750421405	54	0.59695885719867	0.948809296771882	0.595	0.878222495877047
chr1cre204	0.147216462589822	60	0.261660651988005	0.870538929276585	0.263263263263263	0.686728533935318
chr1cre210	0.126416325964842	46	0.402498517625806	0.913259363111495	0.286144578313253	0.705727184836598
chr1cre212	0.00872151986308061	59	0.947728829955247	0.99375255217882	0.951	0.989330497454456
chr1cre216	-0.118822521006797	56	0.383084513343441	0.908268411301612	0.381	0.771991218952726
chr1cre220	0.200004162460847	43	0.198475577302117	0.844904919376913	0.151668351870576	0.568967578185349
chr1cre223	0.170239480128388	38	0.306850088314222	0.884744716878711	0.186925434116445	0.611970805595755
chr1cre229	0.022066131998507	61	0.865956225428345	0.985433538958438	0.851	0.963468361781807
chr1cre237	0.294555716423675	30	0.114088524619298	0.787514588520329	0.080042689434365	0.450746284176415
chr1cre238	0.0735499178081826	51	0.608003447136328	0.949457590935186	0.597597597597598	0.879458891369854
chr1cre243	-0.135640950427775	59	0.305679763151604	0.884326887076544	0.319639278557114	0.731058487567014
chr1cre247	-0.18592520490289	49	0.20087424721872	0.845864621192062	0.104208416833667	0.498163698726163
chr1cre254	-0.266122066989293	60	0.0398565774666625	0.742698467893471	0.032	0.311042309402171
chr1cre257	-0.190364722543465	60	0.145144014475241	0.807252927183443	0.065	0.415532924146635
chr1cre264	-0.103967731690821	57	0.441514465799132	0.919869139707958	0.402402402402402	0.785032027011793
chr1cre272	0.102232349618876	34	0.565071111702174	0.941589055333259	0.478128179043744	0.826599022384844
chr1cre280	-0.185727922153215	50	0.196583419417899	0.842561755892671	0.140280561122244	0.553546921205984
chr1cre282	0.013979521022285	50	0.92323896099059	0.991170229163365	0.915747241725176	0.981064558296969
chr1cre289	0.176430006678511	38	0.2893282118614	0.880158966929115	0.243927125506073	0.67028910647327
chr1cre292	-0.0519524333466131	25	0.805194909080785	0.977198617234624	0.765418502202643	0.938796146953405
chr1cre305	0	56	1	1	0.996996996996997	0.997867833948546
chr1cre307	-0.030778702596689	59	0.816994658294455	0.979781700587972	0.798792756539235	0.948499667527595
chr1cre308	-0.218010645545567	51	0.124327210848864	0.7946924033036	0.0913654618473896	0.474221866041716
chr1cre312	0.0465948623609602	48	0.753156407615524	0.970318477468278	0.748230535894843	0.933302850333131
chr1cre328	-0.0745263610174904	64	0.558362883310852	0.939722520589907	0.584	0.873954258285392
chr1cre333	0.0496821855319253	76	0.669958889131999	0.958318175518916	0.668	0.906235593731318
chr1cre340	0.066335008462363	75	0.571766009998427	0.943469471599968	0.465	0.819209350881384
chr1cre342	-0.166890914010867	44	0.278908104689898	0.876166592576773	0.245983935742972	0.672287820559302
chr1cre351	0.202753600600312	39	0.215751072600731	0.851184974060369	0.146733668341709	0.562048491816583
chr1cre360	-0.0799897284945877	61	0.540009641896803	0.935444017563829	0.54	0.855806308431956
chr1cre367	-0.0707910159723847	59	0.594178233477745	0.948462634122207	0.522	0.847700509874327
chr1cre369	-0.0649734312987875	55	0.637436010399357	0.951598092055782	0.619	0.887576726510287
chr1cre370	0.0734536692376479	36	0.670294311063721	0.958318175518916	0.643666323377961	0.897216046264237
chr1cre386	-0.063973010788557	50	0.65894611727087	0.955850838675659	0.61961961961962	0.888027091963196
chr1cre389	0.127946021577114	50	0.37589822091038	0.905763231042789	0.274096385542169	0.695210993148201
chr1cre390	-0.350931203171798	57	0.00744000933141142	0.722088729034198	0.00100603621730382	0.0476979678985569
chr1cre399	-0.0831688194896371	50	0.565822910128013	0.941785557293846	0.507507507507508	0.841416740181954
chr1cre415	-0.0659906979195937	43	0.674165893565285	0.958871336806568	0.626880641925777	0.890722756437103
chr1cre426	0.188540563510944	72	0.112720843970404	0.786759670424498	0.037	0.330597537881557
chr1cre437	0.098015006615493	46	0.516960048583957	0.928688240495249	0.548841893252769	0.85977006856114
chr1cre440	0.16571776232929	46	0.271047953843366	0.872976881797906	0.156941649899396	0.575477782580506
chr1cre441	0.00990957479752576	51	0.944977096059209	0.993578779097698	0.951	0.989330497454456
chr1cre444	-0.00808452083454443	35	0.963236650833533	0.995490299255694	0.963389121338912	0.992369548261787
chr1cre454	-0.128169225742182	51	0.370079593649116	0.903755119487032	0.29029029029029	0.70910512704825
chr1cre458	-0.159744612766174	65	0.203695431539031	0.848307679928957	0.12	0.523533936127796
chr1cre462	-0.0831759520156559	54	0.549872112388919	0.938601658517586	0.491	0.832940815795791
chr1cre473	0.284380703143972	64	0.022759331467472	0.729726480868395	0.005	0.129352147858396
chr1cre492	0.0434457150132607	72	0.717076753445524	0.964746236135092	0.684	0.912256391302638
chr1cre503	-0.0392474871812536	71	0.745211020417645	0.968979648773334	0.693	0.915105602697819
chr1cre504	0.0659545662226792	80	0.56106211100705	0.939722520589907	0.52	0.846771481927769
chr1cre507	0.0800246267513914	59	0.54684365155971	0.937861083214204	0.439	0.805426556254496
chr1cre508	0.0180775381515547	69	0.882791043702461	0.987514862363118	0.885	0.972889366377257
chr1cre519	-0.00972802445489107	74	0.934439274316321	0.992404340283046	0.909	0.979303283140279
chr1cre524	-0.134133874215415	62	0.298626627262163	0.880594022156248	0.293	0.710942351300118
chr1cre532	0.0412911781185433	52	0.771326090482716	0.97305985504536	0.746733668341709	0.932741506690471
chr1cre534	-0.0464912029169604	46	0.75899037475993	0.971408658907065	0.725529767911201	0.926098303198051
chr1cre541	-0.268793601114312	49	0.06182981456333	0.755474869297024	0.039	0.337473435105893
chr1cre547	-0.210239699248057	58	0.113183713771771	0.787091576019502	0.042042042042042	0.347636505893051
chr1cre556	0.0206032814687203	82	0.854228484139001	0.983963147953699	0.809	0.951371053352332
chr1cre560	-0.311903195072463	57	0.0181815218639682	0.729726480868395	0.00200803212851406	0.0755549873125392
chr1cre561	-0.155210668096043	62	0.228367631482707	0.858334387923903	0.198396793587174	0.625502743599256
chr1cre579	-0.112501300179714	56	0.409076500851703	0.914428266272763	0.335	0.741632043785752
chr1cre583	0.0296611873672656	73	0.803278773905325	0.976939881207257	0.79	0.945762748952661
chr1cre589	0.128306605574357	41	0.424018790701596	0.916802852439053	0.380904522613065	0.771991218952726
chr1cre592	-0.343013269082697	45	0.0210700846614147	0.729726480868395	0.00604229607250755	0.143064803714096
chr1cre593	-0.173205080756888	49	0.233984695505104	0.86102533186605	0.156	0.57430091492202
chr1cre595	0.074473195494961	61	0.568396838911465	0.943007917751668	0.512512512512513	0.843685732765049
chr1cre604	-0.110731942087209	56	0.416530390085506	0.915510797387374	0.328	0.73687796219517
chr1cre608	-0.13639933783233	72	0.253254614080457	0.868749416893769	0.183	0.60735358694376
chr1cre610	0.0667423812471915	49	0.64864563339314	0.954365625755465	0.593528816986855	0.877816016137254
chr1cre617	0.126731646427044	62	0.326325116713273	0.889735508076312	0.31	0.724116792342389
chr1cre624	-0.00487379826189029	66	0.969019058444312	0.996434095510562	0.971830985915493	0.99385770870134
chr1cre625	0.0934605951298498	71	0.43820160483605	0.918269845712312	0.443	0.807563044810129
chr1cre633	0.107411493465705	45	0.48249335760878	0.924850498140027	0.4	0.783240778156209
chr1cre636	-0.104687462370843	76	0.368122906954464	0.903252631505299	0.274	0.695044481005085
chr1cre644	0.0881733428354811	55	0.522081547865745	0.92991612567555	0.496	0.835356755575857
chr1cre654	0.0747194459936057	55	0.587704664971852	0.947453382262888	0.579	0.872081374386118
chr1cre657	0.134267719304289	71	0.264275737721736	0.870538929276585	0.2	0.627083487391851
chr1cre659	-0.0465593983811394	62	0.719338370560899	0.964746236135092	0.649	0.899019875933663
chr1cre666	0.134393973566843	80	0.234621335354059	0.86102533186605	0.142	0.555607022562635
chr1cre668	-0.00370298417220503	48	0.980071846777881	0.997145087519942	0.971887550200803	0.99385770870134
chr1cre676	0.0377964473009227	41	0.814507814547218	0.979276054385889	0.783484390735146	0.944044018928139
chr1cre681	0.001997074431755	50	0.989018039798363	0.99855074379642	0.983983983983984	0.995771879997136
chr1cre682	0.160049253502783	59	0.225940574072517	0.856921223069666	0.127	0.53439505284573
chr1cre686	-0.316977655061311	53	0.0207450364955829	0.729726480868395	0.00600600600600601	0.143064803714096
chr1cre693	0.163025377988507	75	0.162264241553595	0.814774348212282	0.157	0.575477782580506
chr1cre694	0.0230354206781334	64	0.856622512793541	0.984284360765521	0.852	0.963764161325392
chr1cre698	-0.113574921964591	43	0.46835012442339	0.922698435889669	0.385155466399198	0.774590336488762
chr1cre708	-0.15626040475901	52	0.268626810683549	0.872161148542849	0.293587174348697	0.711485663325366
chr1cre718	-0.333570328267882	75	0.00344963624534951	0.718813047186448	0	0.0476979678985569
chr1cre721	0.129728767580169	86	0.233854181520548	0.86102533186605	0.229	0.656385006041862
chr1cre723	0.273809172657098	76	0.0166937177987086	0.729726480868395	0.003	0.0967357026216019
chr1cre726	-0.105648207605427	53	0.451509279124975	0.92088242312396	0.363363363363363	0.761266287719909
chr1cre728	-0.280558453999131	52	0.0439448051971498	0.746894511208895	0.015	0.223633667006159
chr1cre734	0.0406790905392035	54	0.770244306595025	0.97305985504536	0.813	0.952587163177331
chr1cre736	-0.347796881502119	50	0.0133275191387781	0.722088729034198	0.001001001001001	0.0476979678985569
chr1cre737	0.124118874928054	86	0.254871198333263	0.869096420328868	0.171	0.593295576126426
chr1cre739	-0.177781289541638	70	0.140912841460728	0.807185183042306	0.132	0.541830001452152
chr1cre742	-0.045785077175052	47	0.759913220724826	0.971408658907065	0.773508594539939	0.941200914878972
chr1cre746	-0.158084002278112	55	0.249025383042933	0.866536176172516	0.166	0.586946431363556
chr1cre747	0.131267417427912	67	0.289672831626445	0.880158966929115	0.315	0.72764847692402
chr1cre748	-0.287297941085333	76	0.0118564011842558	0.722088729034198	0.004	0.114389060801204
chr1cre753	-0.0452973731045606	60	0.731096370323473	0.967304858345329	0.652	0.900113568469121
chr1cre759	-0.116131449170815	51	0.41705839051149	0.915510797387374	0.349	0.751332795978726
chr1cre772	0.0755482047400607	46	0.617775395484372	0.95088654182396	0.58876629889669	0.875891512018904
chr1cre774	-0.0910401461494259	75	0.437274719188577	0.917482513984689	0.449	0.810594010293311
chr1cre775	-0.113703504772878	55	0.408483777812414	0.914428266272763	0.253507014028056	0.678788825160721
chr1cre778	-0.0812032549796193	78	0.479717242657768	0.924768452130379	0.511	0.842894755964102
chr1cre779	-0.294420213325246	63	0.0191669574187467	0.729726480868395	0.019	0.248270097536197
chr1cre788	0.00510856099894394	50	0.97191266142972	0.996632929694835	0.957915831663327	0.990947646405875
chr1cre801	-0.12458356352887	43	0.426041189384479	0.917139842847067	0.412714429868819	0.790850270126849
chr1cre809	0.0222256240166887	70	0.855090522305414	0.983963147953699	0.826826826826827	0.956410746492559
chr1cre810	0.00304849714125943	62	0.981239129383007	0.997368075714829	0.976	0.994640604485571
chr1cre821	-0.013490413408592	60	0.918516396766552	0.990975979256493	0.887887887887888	0.973669178327951
chr1cre828	0.113933463968572	58	0.394446875039237	0.911833573431552	0.331331331331331	0.739386654453561
chr1cre832	-0.156270460585236	66	0.210203885251568	0.850971585991502	0.299	0.715414119041237
chr1cre843	-0.0241178650590128	53	0.863894468964987	0.984887921787682	0.845845845845846	0.961913913256259
chr1cre847	-0.124034734589208	51	0.38584280586609	0.908268411301612	0.349699398797595	0.752025109585223
chr1cre854	-0.0831268371888072	54	0.550108560757704	0.938742172022234	0.448	0.810146907353898
chr1cre856	-0.198892718628169	60	0.127640312030188	0.796389559462074	0.0820820820820821	0.454971017818263
chr1cre860	0.181385539176069	68	0.138787179078748	0.804430477608438	0.128	0.535870752749219
chr1cre861	0.0554016646740402	59	0.676851380152357	0.958975982920198	0.62	0.888027091963196
chr1cre876	0.0506811069300107	52	0.721232575004439	0.965194772701505	0.692	0.914875526176296
chr1cre888	0.100767363886577	57	0.455773967486709	0.92088242312396	0.41	0.78903878449528
chr1cre889	-0.0308194406123374	68	0.802980938123205	0.976939881207257	0.771	0.940388064853669
chr1cre896	0.129127624974398	77	0.263033298512159	0.870538929276585	0.3	0.71621539825874
chr1cre905	-0.286456656874897	43	0.0625594605445581	0.755474869297024	0.0184804928131417	0.246766922143183
chr1cre907	-0.046903466042121	83	0.673709569484176	0.958829424904608	0.676	0.909370707467292
chr1cre914	0.0181887718308352	48	0.902341619232258	0.989937830252645	0.881	0.971862284504486
chr1cre922	0.0151261438840251	73	0.898928964597416	0.989804826144612	0.907	0.97876821811472
chr1cre926	0.0233419570418421	88	0.829092580590379	0.980757101922383	0.79	0.945762748952661
chr1cre947	-0.145517978957038	54	0.293757455774749	0.880158966929115	0.183734939759036	0.6084578068944
chr1cre951	-0.0654402760848057	54	0.638256304267675	0.951808600030298	0.649	0.899019875933663
chr1cre954	0.105355995394669	80	0.352322582504898	0.899195904225377	0.293	0.710942351300118
chr1cre959	-0.0326466460362231	48	0.825653770834988	0.980757101922383	0.831831831831832	0.957976564515472
chr1cre974	-0.312151606122062	51	0.0257481377911874	0.729726480868395	0.00100401606425703	0.0476979678985569
chr1cre986	-0.151632158103344	40	0.350297696012652	0.898226125131839	0.217125382262997	0.645673241056696
chr1cre1009	-0.180648920932378	43	0.246352045579914	0.865161065758068	0.173869346733668	0.596842399053484
chr1cre1014	-0.0136373028768949	69	0.911445390394808	0.99048348457516	0.913	0.980315361970181
chr1cre1018	0.0384953648957745	60	0.77027174270131	0.97305985504536	0.72	0.924147712007749
chr1cre1021	-0.196338363124651	50	0.171766242701988	0.823701924279794	0.0775427995971803	0.446125498867013
chr1cre1026	-0.0142619739879877	74	0.904005059058646	0.990356564595878	0.894	0.975414416674708
chr1cre1028	-0.0692459998412547	82	0.536466261298161	0.935136325507866	0.458	0.815299560742906
chr1cre1039	0.0136293255127276	39	0.934368730885982	0.992396700231245	0.919678714859438	0.981870193941377
chr1cre1041	-0.238714645517785	43	0.123167645148427	0.791946663201797	0.0945674044265594	0.48120269297337
chr1cre1043	0.0240613329764879	78	0.834367607443181	0.981512244326894	0.837	0.95947035028134
chr1cre1051	0.0333339917890572	70	0.784125611059218	0.974405511737079	0.757	0.936219237318108
chr1cre1059	-0.204623683096895	48	0.162980552090663	0.814774348212282	0.124248496993988	0.530150051918371
chr1cre1074	-0.0856832044746765	67	0.4905602084045	0.925553680730264	0.454	0.813202099571214
chr1cre1084	-0.108735600455792	64	0.392396151110129	0.911031737119503	0.354	0.754720292642456
chr1cre1097	0.0241797844836881	72	0.840220920051483	0.982192684205186	0.834	0.958585166879426
chr1cre1098	-0.0555340922545473	62	0.668135749663161	0.958152690000879	0.6	0.880228705874212
chr1cre1107	-0.170143512483612	81	0.12886648878798	0.796654970287031	0.086	0.462920083788244
chr1cre1126	0.106668773724983	70	0.37945715890353	0.906697593596537	0.312	0.725580698903721
chr1cre1134	-0.144257446521154	52	0.307578238334408	0.884872583091633	0.249498997995992	0.675415959793872
chr1cre1140	-0.0669104212884994	64	0.599358893464704	0.949003440632612	0.759	0.936824340649744
chr1cre1150	-0.218592829263468	68	0.0733142282367712	0.766626811304386	0.057	0.394357191105159
chr1cre1160	0.00614864699818471	54	0.964803728448763	0.99557566375048	0.964894684052157	0.992528457158105
chr1cre1162	-0.170132629122933	54	0.218715392877447	0.851184974060369	0.19	0.615165034457744
chr1cre1167	0.0476731294622796	49	0.744967601025771	0.968979648773334	0.717717717717718	0.923572667528754
chr1cre1177	0.236627421219862	52	0.091230067403935	0.776012231181963	0.0240480961923848	0.276167597408312
chr1cre1181	-0.123183005736374	86	0.25849907896818	0.869770741015067	0.256	0.680205481705454
chr1cre1182	0.102390775794219	61	0.432324327072241	0.917367933278805	0.385	0.774401643767382
chr1cre1184	-0.0128068185507015	94	0.902494829571488	0.989937830252645	0.946	0.98810490595785
chr1cre1191	-0.2041469517052	72	0.0854155066279565	0.77446825804086	0.089	0.46907887131359
chr1cre1193	-0.202111949211667	47	0.173069622116847	0.825530389646284	0.153153153153153	0.570620444149953
chr1cre1200	0.024291177720874	70	0.841789819567694	0.982313807358005	0.813	0.952587163177331
chr1cre1202	0.0785146760962233	77	0.497300427829204	0.927455042974312	0.421	0.795313142901697
chr1cre1212	0.111555311144685	73	0.347414913578226	0.898087081252259	0.274	0.695044481005085
chr1cre1238	-0.0193470375685777	85	0.860493280306744	0.984467058471301	0.852	0.963764161325392
chr1cre1243	0.0978075995544939	71	0.417100870983728	0.915510797387374	0.294	0.711485663325366
chr1cre1246	0.165602416488092	79	0.144692586781582	0.807252927183443	0.063	0.410593825427408
chr1cre1248	0.101655611134063	38	0.543658081914888	0.937718067120593	0.48118006103764	0.828320488942123
chr1cre1256	0.0430405289872929	54	0.757302810731949	0.971170250694208	0.700700700700701	0.917958406683344
chr1cre1262	0.0449281723404865	65	0.722309611288421	0.965742969696851	0.694	0.915428840305809
chr1cre1273	0.0409208499451105	64	0.748173124163468	0.969436284926299	0.688	0.913575271679559
chr1cre1279	-0.0545351002690139	60	0.678984617690816	0.959160635212095	0.619859578736209	0.888027091963196
chr1cre1286	0.0602261612148007	42	0.704780419973667	0.962764124013494	0.607142857142857	0.883212986879316
chr1cre1287	-0.194638141332682	62	0.129536640724234	0.797661569904329	0.084	0.458705776289523
chr1cre1288	-0.186403720035629	61	0.150325708157361	0.810071491449508	0.219	0.647315138681933
chr1cre1307	0.0747109086240701	53	0.594948944949625	0.948462634122207	0.613613613613614	0.885618546662188
chr1cre1308	0.351378444083884	65	0.00410385595469641	0.718813047186448	0	0.0476979678985569
chr1cre1311	-0.0146064022791561	61	0.911041057278594	0.99048348457516	0.893	0.975160841277046
chr1cre1313	0.0391918951539823	83	0.725006722981051	0.965799833708334	0.676	0.909370707467292
chr1cre1317	0.194600786933247	77	0.0898973624449065	0.776012231181963	0.047	0.364622945425833
chr1cre1328	-0.209468922444283	44	0.172361826826213	0.82514332278652	0.0940940940940941	0.479427168745661
chr1cre1329	0.142574707763544	82	0.201324352410992	0.845864621192062	0.327	0.736152581069063
chr1cre1333	0.0840395337868662	76	0.470432364560818	0.922698435889669	0.486	0.830372400870406
chr1cre1336	0.0108033953925361	69	0.929794937371135	0.992300362135056	0.93	0.984203406329071
chr1cre1338	0.0507176390574781	71	0.674456677971575	0.958871336806568	0.568	0.867598521180354
chr1cre1341	-0.181385539176069	68	0.138787179078748	0.804430477608438	0.074	0.437169270425135
chr1cre1348	-0.0454794026827098	51	0.751319443531797	0.970176017331619	0.707955689828802	0.920254040756267
chr1cre1373	-0.128674774496326	57	0.34012211335949	0.896893479410596	0.278836509528586	0.69941141083438
chr1cre1377	0.226206964179432	37	0.178217655848718	0.83061302633007	0.132056451612903	0.542015808961437
chr1cre1383	-0.00580581488102546	32	0.974841942229316	0.996632929694835	0.968463886063072	0.993293376366702
chr1cre1390	0.118212759454686	72	0.32266975859467	0.888966464740321	0.225	0.653020372541134
chr1cre1397	0.125419617119638	93	0.230963181135119	0.86102533186605	0.226	0.653808086924632
chr1cre1402	-0.0395314448731456	42	0.803702248280479	0.976945878841362	0.766220391349125	0.939025540813663
chr1cre1403	0.275	65	0.0266205303148075	0.729726480868395	0.003	0.0967357026216019
chr1cre1405	0.304709155707221	59	0.0189486585923929	0.729726480868395	0.003	0.0967357026216019
chr1cre1406	0.0454256762579498	51	0.751603826671776	0.970176017331619	0.723618090452261	0.925394990598423
chr1cre1418	-0.0116073756385295	64	0.927467274705017	0.991990657804029	0.927	0.98343712938174
chr1cre1420	-0.187395455804529	27	0.349279412820303	0.898087081252259	0.358510638297872	0.758071154660226
chr1cre1426	NA	NA	NA	NA	NA	NA
chr1cre1432	-0.3548460946886	43	0.01955042259811	0.729726480868395	0.00303336703741153	0.0967357026216019
chr1cre1438	-0.195244207985486	39	0.233600869004647	0.86102533186605	0.255533199195171	0.680205481705454
chr1cre1459	-0.368322088688868	57	0.00481725602974003	0.718813047186448	0.003	0.0967357026216019
chr1cre1469	-0.298889922692134	64	0.0164347932144782	0.729726480868395	0.025	0.280458266104775
chr1cre1470	0.0813008289070672	95	0.433492078170748	0.917367933278805	0.523	0.848211782030992
chr1cre1477	-0.0778126452034043	75	0.506968089872814	0.928365497708471	0.559	0.864210886617109
chr1cre1480	-0.0386084789717153	56	0.777553759720931	0.973123730551194	0.752763819095477	0.934775915766668
chr1cre1487	0.00868215537761577	93	0.934172126563374	0.992396700231245	0.93	0.984203406329071
chr1cre1489	-0.0985035729299754	80	0.384686805087976	0.908268411301612	0.439	0.805426556254496
chr1cre1496	-0.00584256091166243	61	0.964355842505093	0.995490299255694	0.962	0.991912175163311
chr1cre1503	0.0582726642234881	73	0.624342664677986	0.95088654182396	0.578	0.87171318560148
chr1cre1504	-0.016042537031855	52	0.910126163100532	0.99048348457516	0.918099089989889	0.981555466499671
chr1cre1528	0.0566533762477459	45	0.711646967951389	0.964042733362394	0.641775983854692	0.896432607326481
chr1cre1533	0.136575804264734	47	0.359979985030332	0.902350825239491	0.243460764587525	0.67028910647327
chr1cre1542	0.0949238770859991	68	0.441305183615814	0.919869139707958	0.407	0.787312312517821
chr1cre1590	-0.299602062762251	53	0.0292974261388011	0.73780483339285	0.009	0.175867419974833
chr1cre1595	0.130586584144892	48	0.376329949540778	0.905763231042789	0.337337337337337	0.743280960048884
chr1cre1597	0.0579358450102347	83	0.60288707957163	0.949003440632612	0.547	0.858981750337957
chr1cre1604	0	55	1	1	0.996	0.99755573074913
chr1cre1608	-0.169972353412251	65	0.175849774097264	0.828197307666853	0.104	0.497735562610229
chr1cre1621	-0.257130514745059	57	0.0534970580715626	0.752521174222688	0.054	0.385988868747489
chr1cre1624	-0.00952035605274183	67	0.939051016710852	0.992631044901309	0.916833667334669	0.981241426666107
chr1cre1632	-0.0117130321416455	49	0.936334857565687	0.992631044901309	0.936	0.98558705639854
chr1cre1636	0.0319103265855623	52	0.82231220625585	0.980100412970776	0.794383149448345	0.947305641017341
chr1cre1640	0.00328428921336931	85	0.976201522202366	0.996794986393814	0.97	0.99347480426466
chr1cre1644	-0.174336970349345	87	0.106314789400538	0.782906583002721	0.129	0.537437151489843
chr1cre1647	0.0912043158371255	76	0.433299245348622	0.917367933278805	0.342	0.746303921348876
chr1cre1661	-0.0381385035698237	49	0.794730905741622	0.975748376007797	0.775427995971803	0.941995111459441
chr1cre1667	0.300634491635567	49	0.0358221155039552	0.742698467893471	0.0130260521042084	0.210173668696643
chr1cre1672	-0.0101524150645529	43	0.948481573886067	0.993839281910615	0.923232323232323	0.982633192358417
chr1cre1677	0.100647255948039	51	0.482221752474164	0.924850498140027	0.4004004004004	0.783806076597115
chr1cre1678	NA	NA	NA	NA	NA	NA
chr1cre1680	-0.435697757493847	39	0.00556404300085109	0.722088729034198	0	0.0476979678985569
chr1cre1693	0.157392812644651	47	0.290704268361182	0.880158966929115	0.203219315895372	0.631006374749108
chr1cre1702	-0.129372486600009	81	0.249691017139346	0.866536176172516	0.203	0.630625570107153
chr1cre1708	-0.368273432393211	65	0.00254148417189482	0.718813047186448	0	0.0476979678985569
chr1cre1711	0.0502355831555985	68	0.684132790183743	0.960228032444965	0.648	0.898552017627412
chr1cre1713	0.0419502183336864	42	0.791949487351158	0.975748376007797	0.797174571140262	0.948048284799847
chr1cre1714	-0.00738440798324851	48	0.960271615247563	0.994879885064093	0.943943943943944	0.987572903687438
chr1cre1716	-0.245016190852999	58	0.0637772723882644	0.755474869297024	0.029	0.299064601683493
chr1cre1726	-0.0505339428794912	40	0.756813462669117	0.971170250694208	0.667673716012085	0.906235593731318
chr1cre1744	-0.0244449273119753	70	0.840801496080083	0.982192684205186	0.799	0.948499667527595
chr1cre1755	-0.145780527929456	64	0.250386370240553	0.867493096823951	0.167	0.588290096135913
chr1cre1756	0.0790964996460416	73	0.50593542207781	0.927864859596085	0.376	0.769010433938488
chr1cre1757	-0.193534014993083	75	0.0961778952268739	0.779251572096576	0.07	0.4278840193181
chr1cre1766	0.0714688348969374	76	0.539539046079184	0.935444017563829	0.416	0.792416772896509
chr1cre1767	-0.179028718509858	64	0.156931817566006	0.811807140796492	0.12	0.523533936127796
chr1cre1773	0.0495079078058087	72	0.679614102139603	0.959160635212095	0.657	0.902103764572539
chr1cre1775	-0.124576986942515	73	0.293666370814483	0.880158966929115	0.162	0.582080462692259
chr1cre1790	0.166988878211278	40	0.303059599578262	0.882695273238653	0.244150559511699	0.670670117242756
chr1cre1807	0.0723535951770383	53	0.60665262337359	0.949207978124704	0.547094188376753	0.859093864192301
chr1cre1811	-0.185708891592016	54	0.178795445328446	0.831298660668765	0.109	0.506292439782546
chr1cre1814	-0.232149037160873	60	0.0742835191668578	0.767284899473745	0.017	0.236227142463168
chr1cre1838	0.0312347523777212	49	0.831287307874619	0.981435214976018	0.762917933130699	0.938010351013899
chr1cre1844	-0.215234748028117	40	0.182271730197749	0.8338984412557	0.0756811301715439	0.441729814941741
chr1cre1853	-0.143279365639193	62	0.266582551413137	0.870792612303716	0.199	0.625868764603345
chr1cre1855	0.232724902509028	45	0.123939978166631	0.793777664884826	0.051307847082495	0.378168738329335
chr1cre1861	-0.19715184357891	52	0.16123940354425	0.814774348212282	0.121121121121121	0.525330552591539
chr1cre1878	-0.028772070684272	80	0.799999750202976	0.976711979984279	0.791	0.946118439008565
chr1cre1879	0.176889543501744	28	0.367871975534708	0.903252631505299	0.301414581066376	0.717889794315866
chr1cre1880	-0.123672001393378	62	0.338234431338514	0.896181111032333	0.273	0.694291224371079
chr1cre1889	0.190687361697919	68	0.119322030075921	0.789029528886147	0.064	0.413086369950336
chr1cre1891	-0.161287370684219	72	0.175896898632919	0.828197307666853	0.101	0.492530003737888
chr1cre1895	0.209081425967784	87	0.0519541867514489	0.750292020374991	0.012	0.202292736896648
chr1cre1897	0.17476956205675	82	0.116316859559015	0.789029528886147	0.09	0.47110661872502
chr1cre1899	-0.0469380695655563	44	0.762228693607461	0.971987322939362	0.732931726907631	0.928470316292617
chr1cre1908	0.117231335957262	70	0.333791468384958	0.894097608599367	0.289	0.707956914232891
chr1cre1915	-0.05087230797228	47	0.734164088332375	0.967542588062556	0.680360721442886	0.911131997775385
chr1cre1927	-0.166189134131713	72	0.16295399551124	0.814774348212282	0.1001001001001	0.490925291749895
chr1cre1938	0.141739038456202	68	0.248921635917384	0.866536176172516	0.176	0.599002177293935
chr1cre1950	-0.274931914487363	61	0.0320028119132641	0.742698467893471	0.00901803607214429	0.175867419974833
chr1cre1965	0.198182960387904	44	0.19719402051299	0.842561755892671	0.161453077699294	0.582046877011189
chr1cre1972	0.163762730751612	40	0.312628990890272	0.886006966369143	0.21852970795569	0.647315138681933
chr1cre1974	-0.0295382315399403	53	0.833699202563548	0.981512244326894	0.81444332998997	0.953011686431329
chr1cre1975	0.0486463136004166	57	0.719334972414788	0.964746236135092	0.729	0.927118473888054
chr1cre1979	0.241059015439111	84	0.0271800676862468	0.735030918433373	0.009	0.175867419974833
chr1cre1983	-0.218582498493987	53	0.115848377460015	0.789029528886147	0.051	0.377145129448298
chr1cre1987	-0.140780852583363	52	0.319504854401124	0.888894525044822	0.236236236236236	0.663584449665473
chr1cre1988	-0.0937042571331636	49	0.52190723865416	0.92991612567555	0.489468405215647	0.832447574162464
chr1cre2005	0.0622917817644352	43	0.691497438586185	0.961564111913937	0.648185483870968	0.898772477915537
chr1cre2012	0.287310467327837	50	0.0430646346566218	0.746773701831409	0.014014014014014	0.217374833518445
chr1cre2014	-0.0217786202592188	45	0.8870792014743	0.988536919334663	0.860721442885772	0.96621481812317
chr1cre2017	-0.191423881562819	75	0.0999310489130527	0.780492258060468	0.087	0.465011723551101
chr1cre2019	-0.0507272304014955	58	0.705311110064547	0.963047814730274	0.662	0.904090718395317
chr1cre2035	-0.255337667441989	51	0.0705479884340745	0.7628157992923	0.0541082164328657	0.386148016630779
chr1cre2043	-0.202262627868447	66	0.103381717509828	0.780492258060468	0.061	0.405236329440512
chr1cre2055	-0.0113314902274834	65	0.928614931485923	0.992278546864708	0.935	0.985378332194122
chr1cre2060	0.0377689174984972	45	0.805434693993553	0.977198617234624	0.769539078156313	0.940198330814976
chr1cre2072	0	50	1	1	0.997993981945838	0.998338467708877
chr1cre2075	-0.342286231019564	49	0.016068162064938	0.729726480868395	0.011	0.194228614455715
chr1cre2090	0.195836921486749	61	0.130386137753488	0.798977882728281	0.061	0.405236329440512
chr1cre2094	-0.218528788436492	59	0.0963522137063424	0.779251572096576	0.034034034034034	0.318879993713571
chr1cre2098	0.0276300765833104	57	0.83833795297368	0.981786661329304	0.832	0.957976564515472
chr1cre2105	-0.0717149289951476	61	0.582846248037709	0.946642361429292	0.553	0.861646436806953
chr1cre2115	-0.0385448763639034	80	0.734266167746994	0.967542588062556	0.707	0.91990599779053
chr1cre2116	-0.177438407982167	53	0.203699262045323	0.848307679928957	0.135406218655968	0.54713816239656
chr1cre2117	0.0145721665662658	53	0.917516354017015	0.990743830425531	0.901901901901902	0.977405589825993
chr1cre2130	-0.00395482498230208	73	0.973509555893354	0.996632929694835	0.958	0.990947646405875
chr1cre2147	-0.0478668313264367	73	0.687576414123442	0.960960258015032	0.616	0.886539233739234
chr1cre2155	-0.154361593028357	85	0.158379768961232	0.814160792236036	0.107	0.503057797859955
chr1cre2157	-0.121802202510556	88	0.258272453000836	0.869770741015067	0.211	0.639243517947893
chr1cre2162	0.00616388812246747	68	0.960212577350873	0.994879885064093	0.949	0.988851166705577
chr1cre2169	-0.166652950938818	63	0.191746818314542	0.838161300292811	0.128128128128128	0.536030060647722
chr1cre2177	0.0762782131288352	68	0.536412971001177	0.935094331410736	0.514	0.844150785230592
chr1cre2181	-0.05926955847702	71	0.623439481308299	0.95088654182396	0.617	0.886924753146586
chr1cre2184	-0.136469890480472	49	0.34978179474162	0.898087081252259	0.25777331995988	0.682078765441721
chr1cre2190	-0.144290399935065	57	0.284236874032819	0.878428076828887	0.151151151151151	0.567858107088127
chr1cre2192	-0.114095791903902	74	0.333071776557266	0.893755752539173	0.442	0.807132503916491
chr1cre2195	0.10506658626071	70	0.386697750183899	0.908268411301612	0.336	0.742257380039411
chr1cre2196	-0.119811168769631	82	0.283653545161287	0.878428076828887	0.199	0.625868764603345
chr1cre2205	0.0106522834535814	48	0.942715080981135	0.992929480258464	0.91851106639839	0.981658498949775
chr1cre2216	-0.132440172040436	67	0.285347647536566	0.878474127774014	0.305	0.720234261328432
chr1cre2219	-0.143819059428443	62	0.264766556702254	0.870538929276585	0.146292585170341	0.561349534213621
chr1cre2222	-0.14073716569176	75	0.228453021004676	0.858491621533265	0.122	0.526724588244279
chr1cre2225	-0.318937557158601	67	0.00852413249305516	0.722088729034198	0.001	0.0476979678985569
chr1cre2228	-0.0682288239221013	57	0.614055887693643	0.950871470834583	0.558	0.863806623858487
chr1cre2230	-0.254940193114856	45	0.0910048837706617	0.776012231181963	0.120240480961924	0.524165113200531
chr1cre2233	-0.1408721450121	49	0.334307296293769	0.894097608599367	0.233805668016194	0.661129863314925
chr1cre2242	0.0816419418277558	38	0.626061626517652	0.95088654182396	0.512639029322548	0.843685732765049
chr1cre2243	-0.127398861856577	60	0.332032292728165	0.893285594805698	0.235235235235235	0.662577846016776
chr1cre2256	0.0183733132689438	56	0.893083517046738	0.988872943088085	0.913827655310621	0.980575851119011
chr1cre2257	-0.15531039968327	58	0.244367003473364	0.864237345326302	0.226680040120361	0.654729890139791
chr1cre2264	-0.114833850352643	41	0.474654472562814	0.923876750202617	0.441836734693878	0.807132503916491
chr1cre2267	-0.280157762864111	44	0.0654844589460397	0.755474869297024	0.0365482233502538	0.329994422296976
chr1cre2273	0.12835776589189	74	0.275760336935111	0.875718441475358	0.199	0.625868764603345
chr1cre2284	-0.04546644594411	72	0.704509782441515	0.962764124013494	0.633	0.893030378399062
chr1cre2291	-0.288070798784682	53	0.0364612002216539	0.742698467893471	0.006	0.143064803714096
chr1cre2295	-0.36809197029431	59	0.00412651736844857	0.718813047186448	0	0.0476979678985569
chr1cre2296	0.0104058328970515	73	0.930373208821555	0.992367427167827	0.923	0.982401334203557
chr1cre2302	-0.28964979850158	65	0.0192666450907553	0.729726480868395	0.001	0.0476979678985569
chr1cre2311	-0.142525364843681	59	0.281550201791017	0.877488414738283	0.201402805611222	0.629328381260619
chr1cre2312	-0.118587089880928	67	0.339179254457785	0.896893479410596	0.309	0.723325061247024
chr1cre2313	0.064516163961719	73	0.587627171299083	0.947453382262888	0.446	0.809209223708633
chr1cre2318	0.185832461216632	81	0.0967136195767032	0.780211242006016	0.115	0.515634029953338
chr1cre2320	0.0828992487737274	46	0.583883577764715	0.946642361429292	0.481444332998997	0.828512607937731
chr1cre2322	-0.0550104710965242	74	0.641563178682004	0.953098900775137	0.54	0.855806308431956
chr1cre2341	-0.0175276827349873	61	0.893344252352903	0.988872943088085	0.897	0.976047277941559
chr1cre2351	0.160049253502783	59	0.225940574072517	0.856921223069666	0.217	0.645334332807294
chr1cre2355	NA	NA	NA	NA	NA	NA
chr1cre2368	-0.0238008901318546	67	0.848385012995996	0.983047374520988	0.848	0.96250379288537
chr1cre2370	-0.226047195432122	58	0.0879688527847584	0.77446825804086	0.035	0.322695901786211
chr1cre2386	0.171988477865709	63	0.177707337898598	0.83001394808304	0.123	0.528251680783986
chr1cre2399	0.034116587833232	66	0.785662044602121	0.974769549029572	0.707	0.91990599779053
chr1cre2405	0.0217987567913145	77	0.850737945099796	0.983129299397297	0.834	0.958585166879426
chr1cre2411	0.045920295811845	87	0.672774033322956	0.958808215962947	0.652	0.900113568469121
chr1cre2413	-0.0024614693277495	48	0.986752497826666	0.997940631076499	0.988988988988989	0.996772546700856
chr1cre2422	0.139475415167513	57	0.300783092579495	0.882398809342923	0.222	0.649890774143437
chr1cre2424	0.0169090768004985	58	0.899746679677945	0.989804826144612	0.903614457831325	0.977991918070798
chr1cre2430	-0.00976681731121865	79	0.931921360625648	0.992367427167827	0.911	0.979768232750148
chr1cre2431	-0.174704719828729	51	0.220135848888376	0.852430011485446	0.158475426278837	0.578143253257552
chr1cre2443	-0.00187688516348531	78	0.986988207421936	0.998014746781281	0.977	0.994709358482184
chr1cre2454	0.226335421772434	36	0.184380474511897	0.834817448059245	0.129363449691992	0.538406253649806
chr1cre2460	0.0406798025523404	46	0.788374584326943	0.975163127680799	0.733733733733734	0.928865346024462
chr1cre2463	-0.0359636366232155	68	0.770929185090465	0.97305985504536	0.754	0.935158278852764
chr1cre2465	0.0525080901508813	61	0.687761573848056	0.960960258015032	0.740740740740741	0.931027940244991
chr1cre2476	0.107068731048535	42	0.499746756891553	0.927455042974312	0.451063829787234	0.811654553125573
chr1cre2490	0.19805999108741	57	0.139711477112466	0.805897592989827	0.0402414486921529	0.341702252466409
chr1cre2495	-0.162503258939413	64	0.199509379374112	0.845794260125644	0.157157157157157	0.575780070228355
chr1cre2500	0.17920430732685	58	0.178304180974663	0.83061302633007	0.0940940940940941	0.479427168745661
chr1cre2503	-0.134049446993552	77	0.245116048980589	0.865046351597657	0.187	0.611970805595755
chr1cre2504	0.0307432349909235	54	0.825340315276027	0.980643613999607	0.857575757575758	0.965371705167931
chr1cre2506	0.0451090140598355	80	0.691131749336014	0.961339875713325	0.66	0.903392544408306
chr1cre2516	-0.0314900111813964	82	0.77882839501421	0.973123730551194	0.857	0.965126540504648
chr1cre2519	-0.0655880338157186	60	0.618560026687707	0.95088654182396	0.615	0.886077517733509
chr1cre2520	-0.147690803515345	45	0.332952692342278	0.893755752539173	0.287726358148893	0.70709025897885
chr1cre2521	-0.169106263000426	74	0.149771992498505	0.809644969791719	0.122	0.526724588244279
chr1cre2538	-0.0263872407073673	57	0.845518564626619	0.982531219642758	0.812625250501002	0.952587163177331
chr1cre2539	0.0378867615212041	56	0.781608497256654	0.973847538286198	0.797	0.947870335049016
chr1cre2548	-0.109098423015159	69	0.372204720693894	0.905228681897857	0.34	0.744916905337209
chr1cre2549	-0.0580984555699172	66	0.643100899686531	0.953370246777767	0.57	0.868326896130493
chr1cre2554	0.0551653299962674	61	0.672832807314579	0.958808215962947	0.602	0.881188132466801
chr1cre2579	-0.0293161164372789	76	0.801512336761937	0.976939881207257	0.775	0.941586553959669
chr1cre2582	-0.0734206776218803	90	0.491627667061321	0.926237349013429	0.46	0.816362095305862
chr1cre2595	-0.0551075195674438	82	0.622908224637594	0.95088654182396	0.569	0.867957340984314
chr1cre2600	-0.180087063125853	42	0.253771445575319	0.868749416893769	0.0901554404145078	0.471461402506625
chr1cre2602	-0.110810250268763	41	0.490371559484263	0.925468462354607	0.337728194726166	0.743443674209064
chr1cre2604	-0.38892948396956	62	0.00178346305673891	0.718813047186448	0	0.0476979678985569
chr1cre2607	0.00611227456628046	74	0.958779620785288	0.994789086403262	0.951	0.989330497454456
chr1cre2609	0.0329296747423663	59	0.804449431268639	0.977198617234624	0.787	0.944905878230337
chr1cre2610	0.109753929721916	45	0.472938531508513	0.923009864578143	0.484	0.829441113912283
chr1cre2611	-0.134332098851893	37	0.427971594180053	0.917367933278805	0.452947259565667	0.812676877674175
chr1cre2613	-0.0486190250079663	82	0.664461444796314	0.957243584767327	0.626	0.890383559346198
chr1cre2624	-0.00129149140979534	66	0.991788590868307	0.999537894558572	0.99	0.996933230021108
chr1cre2630	-0.0581953564074417	65	0.645176872396969	0.95368926285817	0.563	0.865644623341538
chr1cre2639	-0.123112115703411	85	0.261646419303393	0.870538929276585	0.214	0.64248489139863
chr1cre2665	0.0369344431160268	59	0.781224587933701	0.973847538286198	0.773319959879639	0.941200914878972
chr1cre2676	0.0544110767270385	48	0.713390445400146	0.964387229698157	0.671	0.907509696492265
chr1cre2687	-0.0788745723074428	61	0.545691869538142	0.937861083214204	0.542	0.856690450228796
chr1cre2706	-0.0329321955779164	56	0.809594679445392	0.978006043570085	0.765	0.93855004626283
chr1cre2711	-0.434845893604602	42	0.00400473406893779	0.718813047186448	0	0.0476979678985569
chr1cre2714	-0.134378900968236	61	0.301832150922814	0.882695273238653	0.224	0.651852644944321
chr1cre2722	-0.101512945227594	49	0.487655480685131	0.925029378317644	0.521521521521522	0.847700509874327
chr1cre2727	-0.214962301831719	71	0.0718190641841111	0.76513647145095	0.0690690690690691	0.425475199156733
chr1cre2728	0.0831688194896371	50	0.565822910128014	0.941785557293846	0.49498997995992	0.834804132629977
chr1cre2730	0.0749858094861764	70	0.537268038438682	0.935444017563829	0.426	0.798148803605753
chr1cre2736	-0.213337547449966	70	0.0761877847095345	0.768211870251391	0.056	0.39187020993212
chr1cre2747	-0.0857327050302208	56	0.529838161825067	0.93345280968557	0.466867469879518	0.820287366916608
chr1cre2753	0.25764894473567	51	0.0679529486013322	0.758563416127503	0.035	0.322695901786211
chr1cre2757	0.0321479831866092	56	0.8140471083824	0.979050958530361	0.757271815446339	0.936476872613963
chr1cre2766	-0.138645912581764	69	0.255899280175811	0.869536403254114	0.243	0.669488506960802
chr1cre2778	-0.148082150035564	74	0.20798740460897	0.850728078164118	0.158	0.576979728056671
chr1cre2793	NA	NA	NA	NA	NA	NA
chr1cre2797	-0.157977239246904	55	0.249349250373435	0.866536176172516	0.217	0.645334332807294
chr1cre2801	-0.0674520670429599	60	0.608598963961517	0.950036879761544	0.57	0.868326896130493
chr1cre2805	-0.020815640478054	63	0.871362539640758	0.986139813798368	0.846231155778895	0.962126303140483
chr1cre2806	-0.149336922772375	58	0.263205816526778	0.870538929276585	0.219095477386935	0.64752399645038
chr1cre2807	-0.435884764276163	51	0.00138768230817708	0.718813047186448	0	0.0476979678985569
chr1cre2823	-0.0508167806048439	76	0.662872894700722	0.956884456729695	0.567	0.867199630264226
chr1cre2825	-0.155961544380489	66	0.211117963732814	0.850971585991502	0.258258258258258	0.6825168305484
chr1cre2829	0.128718886305932	74	0.27440042239385	0.875004171694928	0.218	0.646302340622651
chr1cre2834	0.0118708933812123	65	0.925226354828199	0.991789108333769	0.914744232698094	0.980842108257066
chr1cre2839	-0.139303871567765	68	0.257228354391135	0.869770741015067	0.217	0.645334332807294
chr1cre2840	-0.0412042821715165	37	0.808674680063653	0.978006043570085	0.77079107505071	0.940388064853669
chr1cre2851	0.0652580570865512	83	0.557782722833551	0.939722520589907	0.499	0.836989116191211
chr1cre2860	-0.0809344648274097	44	0.601488379221454	0.949003440632612	0.565392354124749	0.866764478555305
chr1cre2863	0.0324867156493938	55	0.813854673379369	0.979050958530361	0.810810810810811	0.952079234717363
chr1cre2865	0.0340932571922372	69	0.78093024496977	0.973847538286198	0.716	0.922840816946898
chr1cre2867	-0.0116131449170815	51	0.935536529874465	0.992631044901309	0.930792377131394	0.984444700065776
chr1cre2868	-0.457957899038858	42	0.00229109221288187	0.718813047186448	0	0.0476979678985569
chr1cre2874	-0.230302838838805	50	0.107614229763686	0.784237914542741	0.0490981963927856	0.37112437688748
chr1cre2879	-0.142054913417281	52	0.315100522106379	0.886524761466403	0.238	0.664893804872424
chr1cre2906	0.250503028671543	69	0.0378896404914952	0.742698467893471	0.041	0.344175316534889
chr1cre2907	-0.0560331814680526	53	0.690251388508308	0.961083586429361	0.602	0.881188132466801
chr1cre2909	0.0893052798842248	47	0.550537709056937	0.938742172022234	0.517102615694165	0.845629882310903
chr1cre2914	0.0882704491325595	62	0.495092941054118	0.927455042974312	0.379379379379379	0.771347660500286
chr1cre2918	-0.195425241133312	56	0.148906901365245	0.808204470570226	0.145145145145145	0.5596753765406
chr1cre2923	0.0354570546427539	91	0.738630158229268	0.968123850108395	0.771	0.940388064853669
chr1cre2939	0.0612797471970524	77	0.596506974232296	0.94851229679958	0.525	0.849189821989729
chr1cre2940	-0.129099444873581	71	0.283270898777261	0.878428076828887	0.238	0.664893804872424
chr1cre2956	0.0252444793633981	83	0.82078431906565	0.980100412970776	0.773	0.940976658891082
chr1cre2961	-0.133335967156229	70	0.271155993579373	0.872976881797906	0.205	0.632948999189885
chr1cre2962	0.0291363321117441	73	0.806691676989698	0.977198617234624	0.815	0.953011686431329
chr1cre2963	-0.30236314125462	80	0.00641118561553929	0.722088729034198	0.004	0.114389060801204
chr1cre2977	0.132872767765984	59	0.315747464981737	0.886881055708065	0.363363363363363	0.761266287719909
chr1cre2987	-0.187920354683317	81	0.092957514826718	0.778523737982501	0.054	0.385988868747489
chr1cre2989	-0.084259652395947	77	0.466259192793093	0.922698435889669	0.338	0.743443674209064
chr1cre2993	-0.124237737563976	38	0.457387315101959	0.92088242312396	0.477064220183486	0.825946742145746
chr1cre2997	-0.221477757073896	45	0.143703482419059	0.807252927183443	0.063	0.410593825427408
chr1cre3000	-0.115765752283261	51	0.418536830910106	0.915700944600554	0.462462462462462	0.81813341182109
chr1cre3016	-0.215923962217502	69	0.0747627345937746	0.767284899473745	0.075	0.439570626349892
chr1cre3017	-0.204672785106661	65	0.101950272719942	0.780492258060468	0.044044044044044	0.354427496389918
chr1cre3019	-0.030701885631268	32	0.867523232807057	0.985718608737474	0.84156378600823	0.961002711996716
chr1cre3024	0.0138418874380573	73	0.907470701813874	0.99048348457516	0.89	0.974270177513599
chr1cre3028	0.1222121640218	63	0.339988872310126	0.896893479410596	0.191	0.616267461880166
chr1cre3039	0.265340033849452	75	0.0214072651545936	0.729726480868395	0.001	0.0476979678985569
chr1cre3042	0.0511698093854466	32	0.780915744265756	0.973847538286198	0.761780104712042	0.937745316059375
chr1cre3056	NA	NA	NA	NA	NA	NA
chr1cre3058	0.371043462573631	50	0.00798403490130038	0.722088729034198	0	0.0476979678985569
chr1cre3068	0.187098910742314	50	0.193241086456681	0.840101471650273	0.168857431749242	0.590688504657489
chr1cre3084	-0.102046912007891	72	0.393674775415693	0.911367886844694	0.376	0.769010433938488
chr1cre3095	-0.077919060571779	85	0.478435941869632	0.924768452130379	0.413	0.790850270126849
chr1cre3096	0.019054914310345	75	0.8710984151567	0.986139813798368	0.893	0.975160841277046
chr1cre3107	-0.157851016853217	87	0.144231666123282	0.807252927183443	0.116	0.517035452419122
chr1cre3109	-0.0694947337148808	57	0.607481654183946	0.949207978124704	0.601609657947686	0.881188132466801
chr1cre3116	-0.189584881478929	52	0.178261398616377	0.83061302633007	0.164164164164164	0.584777081542603
chr1cre3121	-0.0704788317079133	88	0.514072945623741	0.928688240495249	0.487	0.830863116704138
chr1cre3126	-0.134321960040341	79	0.237917724794768	0.861103067683736	0.155	0.572945131586117
chr1cre3147	0.0771244820138409	69	0.528773445392354	0.932969272147601	0.463	0.81813341182109
chr1cre3152	-0.241289004588394	77	0.0345140270501429	0.742698467893471	0.038	0.333978168368457
chr1cre3156	0.027265175638283	87	0.802060816703666	0.976939881207257	0.812	0.952346788191443
chr1cre3162	0.0505127818561107	70	0.677939893208924	0.959160635212095	0.732	0.928080467374606
chr1cre3168	-0.237778177170365	51	0.0929239958256201	0.778523737982501	0.101202404809619	0.492964244302264
chr1cre3176	0.0764274600880815	42	0.630471333999543	0.95088654182396	0.533199195171026	0.852954760851164
chr1cre3185	-0.142879925273819	56	0.293487623758205	0.880158966929115	0.235	0.662190202447311
chr1cre3189	-0.197699504325294	76	0.0869186046441327	0.77446825804086	0.02	0.254638625854361
chr1cre3194	0.079075952431863	64	0.534525130294421	0.934256792828574	0.448	0.810146907353898
chr1cre3198	-0.104201445246047	92	0.322910806047915	0.889064114613366	0.21	0.637997492163009
chr1cre3205	-0.0968618557346506	66	0.439110548008286	0.918669467776977	0.256	0.680205481705454
chr1cre3222	0.0657616660552086	82	0.557209658576281	0.939722520589907	0.544	0.857522076352906
chr1cre3223	-0.270160748814591	57	0.0421086393225116	0.744093479806719	0.016	0.230210720124511
chr1cre3226	0.109980541064284	83	0.322280974744519	0.888953028913872	0.419	0.794206512324465
chr1cre3236	-0.078621585888105	28	0.69086951927106	0.961339875713325	0.694648478488982	0.915818386651905
chr1cre3258	-0.190791811017966	65	0.127911684331374	0.796576661854043	0.137	0.549039154064272
chr1cre3274	-0.219096034187341	61	0.0897961528675409	0.776012231181963	0.061122244488978	0.405372716299742
chr1cre3279	-0.168620005977641	50	0.241771352158678	0.862795841560311	0.155935613682093	0.57430091492202
chr1cre3294	0.262290174187801	48	0.071706720337095	0.764808741554568	0.0442655935613682	0.355442981492868
chr1cre3296	0.132872767765984	59	0.315747464981737	0.886881055708065	0.275	0.695858665731699
chr1cre3301	-0.125368031717491	46	0.406442908149583	0.914428266272763	0.319234642497482	0.730891613369986
chr1cre3308	-0.0414272852260675	66	0.741197305906748	0.968578214999024	0.703	0.918531352919198
chr1cre3311	-0.00176865611040015	54	0.989872879314736	0.998714239468075	0.990963855421687	0.997010834714985
chr1cre3320	-0.13141649203969	58	0.325447884291055	0.889735508076312	0.247	0.673090130548303
chr1cre3336	-0.0435827495855076	66	0.728239713089807	0.967060317908666	0.665665665665666	0.905423244330798
chr1cre3339	-0.101214064437861	53	0.470826968164906	0.922698435889669	0.412	0.790233556500498
chr1cre3341	-0.100790526135794	41	0.530648913286848	0.933756886556557	0.447821681864235	0.810146907353898
chr1cre3359	-0.0970858893431011	71	0.42056297019602	0.915996549435525	0.495	0.834804132629977
chr1cre3361	-0.0488601940621315	76	0.675110628048118	0.958871336806568	0.669	0.906634723026828
chr1cre3362	-0.0625115601591667	52	0.659755808698852	0.956067857739232	0.601805416248746	0.881188132466801
chr1cre3376	-0.339970425909052	42	0.0276056306805331	0.735169079495275	0.00605449041372351	0.143064803714096
chr1cre3381	0.141739038456202	68	0.248921635917384	0.866536176172516	0.219	0.647315138681933
chr1cre3392	0.126905188306911	43	0.41740146511105	0.915510797387374	0.361139369277721	0.759717918531295
chr1cre3403	0.153007748945791	53	0.274039294038494	0.875004171694928	0.176	0.599002177293935
chr1cre3408	0.377407431203601	87	0.000313917181083569	0.718813047186448	0	0.0476979678985569
chr1cre3421	-0.0322587358807818	43	0.837295003737194	0.981786661329304	0.825428859737639	0.956140953407978
chr1cre3422	-0.051280560503078	51	0.7208127401363	0.96502816278054	0.645	0.897540172546059
chr1cre3431	0.0306513659936636	50	0.832648857698513	0.981512244326894	0.810810810810811	0.952079234717363
chr1cre3439	0.195529297181478	48	0.182907754327754	0.834224738739357	0.166836215666328	0.588290096135913
chr1cre3454	-0.042581531362632	51	0.766704170553675	0.972443499654808	0.74222668004012	0.931508534214475
chr1cre3460	0.102224241486442	70	0.399743893446104	0.912256310849402	0.348	0.750642561444787
chr1cre3478	0.00944222937462431	45	0.950913782543832	0.994139653878292	0.923847695390782	0.982654756940634
chr1cre3486	-0.043623834287741	76	0.708271059043643	0.963469524663326	0.639	0.89522496468664
chr1cre3487	-0.263215561764031	47	0.0738416306493077	0.766626811304386	0.0151057401812689	0.223966136942336
chr1cre3490	-0.258573906487641	47	0.0792694173213501	0.769946194941427	0.0480081716036772	0.368041776618431
chr1cre3513	0.00786402689375972	34	0.964792645711043	0.99557566375048	0.957731958762887	0.990947646405875
chr1cre3516	0.423785343179796	53	0.00156633974354329	0.718813047186448	0	0.0476979678985569
chr1cre3522	-0.032556378826474	68	0.792119523670482	0.975748376007797	0.72	0.924147712007749
chr1cre3527	0.0790654914357225	68	0.521582812187883	0.92991612567555	0.436	0.803704477401053
chr1cre3539	0.161133945531188	68	0.189281848577521	0.836736294849748	0.136	0.547535067000582
chr1cre3545	0.118644749469062	73	0.317435592986502	0.888245693856186	0.367	0.763453090311423
chr1cre3549	-0.170132629122933	54	0.218715392877447	0.851184974060369	0.24024024024024	0.667113947017019
chr1cre3554	-0.0691105598454522	77	0.550348309993524	0.938742172022234	0.611	0.884465686546463
chr1cre3557	0.078086880944303	49	0.593817062587007	0.948462634122207	0.525731584258325	0.849539339110561
chr1cre3571	-0.0559804470620228	59	0.673664330646037	0.958829424904608	0.549	0.85977006856114
chr1cre3575	-0.140802853720995	80	0.212846937547157	0.851077552224791	0.194	0.619990653765345
chr1cre3584	-0.180492435796753	49	0.21458598358182	0.851184974060369	0.14070351758794	0.55427090359142
chr1cre3591	-0.0284150711409031	56	0.835318837740308	0.981512244326894	0.808704453441296	0.951371053352332
chr1cre3592	-0.0319568503607441	48	0.829282082592852	0.980757101922383	0.785	0.944326280623608
chr1cre3594	0.0829111012269948	68	0.501465629414166	0.927455042974312	0.523	0.848211782030992
chr1cre3599	-0.0866683786515487	70	0.475593674502868	0.924044623224138	0.338	0.743443674209064
chr1cre3606	-0.165027361421742	62	0.199915874755747	0.845794260125644	0.115	0.515634029953338
chr1cre3608	0.221103619574484	46	0.139763197726484	0.805897592989827	0.0730730730730731	0.435004080950027
chr1cre3611	-0.118152926159761	53	0.399445172454473	0.912084617212121	0.384	0.773789701304565
chr1cre3627	0.0357208915195238	52	0.801500600453163	0.976939881207257	0.759	0.936824340649744
chr1cre3638	0.182620533228634	38	0.272465137202259	0.873720851954453	0.276422764227642	0.697466076078557
chr1cre3639	0.126144717698829	67	0.309068778354374	0.884872583091633	0.293	0.710942351300118
chr1cre3641	0.0668925003830954	54	0.630804725321986	0.95088654182396	0.541624874623872	0.856690450228796
chr1cre3650	NA	NA	NA	NA	NA	NA
chr1cre3655	-0.120232201647168	50	0.405583970552307	0.914428266272763	0.322	0.732480142709605
chr1cre3661	-0.119087797117966	80	0.292735628324368	0.880158966929115	0.229	0.656385006041862
chr1cre3662	-0.115180654751726	52	0.416160593367808	0.915510797387374	0.368367346938775	0.764588138066779
chr1cre3671	-0.0706101957129044	57	0.601714194136024	0.949003440632612	0.601	0.880670742991305
chr1cre3675	-0.0885818451773226	59	0.504666546555778	0.927775648972044	0.597	0.879085914471885
chr1cre3682	0.0897838213885434	75	0.443652506595847	0.92088242312396	0.394	0.7795609349207
chr1cre3685	0.0869933439769343	42	0.583824088926837	0.946642361429292	0.534288638689867	0.853586482638685
chr1cre3692	-0.0608650486922942	66	0.627340976761082	0.95088654182396	0.648	0.898552017627412
chr1cre3694	-0.133803986927585	50	0.354247799524109	0.899845035856364	0.27	0.691752256505155
chr1cre3696	-0.146515887151651	51	0.304918676486665	0.883789573138401	0.22	0.648158564442862
chr1cre3707	-0.0233702436466497	61	0.858113822116509	0.984332764767006	0.786	0.944567833089468
chr1cre3708	-0.125429029620626	51	0.380483057846309	0.907631830358872	0.409227683049147	0.788827980437895
chr1cre3709	-0.197497836252324	70	0.101250986818455	0.780492258060468	0.037	0.330597537881557
chr1cre3711	0.18801031804873	56	0.165253575129985	0.817413318653431	0.112	0.511027509655307
chr1cre3721	0.0366996159649947	44	0.813037614302578	0.979050958530361	0.795131845841785	0.947468989310995
chr1cre3751	0.0504895331493543	60	0.701639861062438	0.962552803407408	0.677	0.909666120010775
chr1cre3753	0.0149052722034981	64	0.906940516101736	0.99048348457516	0.86258776328987	0.966709793535263
chr1cre3755	0.030523384783368	47	0.838611123194538	0.981786661329304	0.804804804804805	0.950244853926328
chr1cre3768	0.30281331944409	39	0.0609574860864004	0.755474869297024	0.0190954773869347	0.24852181715854
chr1cre3772	0.0918472321202928	55	0.504820839408222	0.927790032178515	0.415831663326653	0.792416772896509
chr1cre3777	0.249920288612236	52	0.0739592033208432	0.766626811304386	0.0250501002004008	0.280458266104775
chr1cre3783	-0.0416734500068283	82	0.710088408728273	0.963928325804165	0.677	0.909666120010775
chr1cre3789	0.0974575021321874	76	0.402294607670419	0.913259363111495	0.439	0.805426556254496
chr1cre3790	0.251181784913103	56	0.0618544215119697	0.755474869297024	0.017	0.236227142463168
chr1cre3793	0.0673668885676055	60	0.609052622938399	0.950226099743137	0.621	0.888345318825911
chr1cre3819	-0.0493945121135495	59	0.710253582668599	0.963928325804165	0.7	0.917584090768565
chr1cre3820	-0.232669510271761	65	0.0621631380978893	0.755474869297024	0.0450901803607214	0.357979622205206
chr1cre3835	0.0527004502329611	73	0.657903776976312	0.955836994604783	0.591	0.876709446339543
chr1cre3840	-0.189443857528502	47	0.202176629158727	0.846352967602192	0.106425702811245	0.502607883675321
chr1cre3849	0.125486335779308	76	0.280093075115377	0.876948108330973	0.169	0.590688504657489
chr1cre3861	0.0911453748502575	83	0.412507815618021	0.914523398872104	0.371	0.765893384456211
chr1cre3875	0.205538639491209	63	0.106083580846652	0.782906583002721	0.111	0.509381216516045
chr1cre3892	0.0894191297940292	92	0.396632237718161	0.912073402715042	0.335	0.741632043785752
chr1cre3900	0.0609224782736286	66	0.627015549032475	0.95088654182396	0.583	0.873587014237689
chr1cre3909	0.0217139156814791	56	0.873790345076681	0.986353639620148	0.840242669362993	0.960609890607201
chr1cre3922	0.00595293463648544	85	0.956878445727021	0.994432841721336	0.945	0.987842158950479
chr1cre3925	0.293456764222062	72	0.0123553162065615	0.722088729034198	0.001	0.0476979678985569
chr1cre3933	0.178799634963038	50	0.214101284253111	0.851184974060369	0.142142142142142	0.55585541732648
chr1cre3937	0.128591932746437	56	0.344904417631972	0.897592004604428	0.239239239239239	0.666303438882919
chr1cre3949	-0.0675561339220792	64	0.595831971811421	0.948462634122207	0.538	0.854853360565122
chr1cre3970	-0.136440502985062	76	0.239893498286191	0.862118496445549	0.213	0.641492577334233
chr1cre3975	0.0864425666192341	78	0.451735723670456	0.92088242312396	0.391	0.777676036682616
chr1cre3985	0.0375708373318697	73	0.752324104812212	0.970279700427022	0.695	0.915818386651905
chr1cre3987	-0.00896021536634248	58	0.946776909742199	0.993719118102916	0.921921921921922	0.982261627176562
chr1cre3988	-0.0453742606486515	69	0.711224513452895	0.964042733362394	0.691	0.914590782629733
chr1cre3989	0.175662013130736	76	0.129055994620763	0.796750394077655	0.15	0.566293072745081
chr1cre3991	0.0619435751366798	52	0.662660841954877	0.956884456729695	0.64964964964965	0.899406056106486
chr1cre3998	0.0812167891234844	55	0.555552501090669	0.939722520589907	0.511511511511512	0.843305354974361
chr1cre4000	0.0884024435494763	39	0.592538675267197	0.948313809252221	0.46875	0.821426849796045
chr1cre4011	0.0340817436359536	63	0.790874333067572	0.975553006120204	0.753	0.934775915766668
chr1cre4014	0.2182820625327	35	0.207766280590505	0.850728078164118	0.0974093264248705	0.486611954786659
chr1cre4025	-0.0907357300930575	70	0.45504938588114	0.92088242312396	0.562	0.865330863962161
chr1cre4026	-0.0938413693432523	79	0.410733687778318	0.914428266272763	0.292	0.710151670932725
chr1cre4032	-0.0484122918275927	71	0.688476292984795	0.960967274968521	0.608608608608609	0.883773142067502
chr1cre4034	0.052769009587102	76	0.650749639811469	0.954365625755465	0.573	0.86973315016512
chr1cre4035	-0.0303218887344794	84	0.784235580626425	0.974405511737079	0.756	0.935937070862447
chr1cre4051	-0.0567600737316153	67	0.648227459170479	0.954224180778527	0.587	0.875227251348369
chr1cre4058	-0.112097360023477	66	0.370192948335446	0.903755119487032	0.388	0.775945098547871
chr1cre4068	-0.0197578048454198	59	0.881924595901637	0.987514862363118	0.846	0.961913913256259
chr1cre4077	-0.163430112615153	53	0.242282733358727	0.862795841560311	0.175	0.597956624224353
chr1cre4078	0.0618510769565521	75	0.598086293416434	0.949003440632612	0.661	0.903725632612919
chr1cre4080	-0.0786956299222346	78	0.493430344297765	0.927333093119194	0.377	0.76964697597997
chr1cre4096	-0.207948045301596	94	0.0443045410885548	0.747441136781713	0.016	0.230210720124511
chr1cre4102	-0.0428085771650762	59	0.747504891981261	0.969311343307646	0.660320641282565	0.903725632612919
chr1cre4116	-0.11481209945741	59	0.386551684483461	0.908268411301612	0.307307307307307	0.722278639504249
chr1cre4118	0.10906178326357	90	0.306192417256308	0.884326887076544	0.323	0.733063777114641
chr1cre4120	0.26235391768738	77	0.0211650856818419	0.729726480868395	0.032	0.311042309402171
chr1cre4121	0.0203090598614981	89	0.850166292649311	0.983129299397297	0.866	0.967511048604638
chr1cre4123	-0.00734777856962342	55	0.957539378309942	0.994475540258441	0.949	0.988851166705577
chr1cre4143	-0.168446638834478	52	0.232591208506771	0.86102533186605	0.192384769539078	0.618411911955521
chr1cre4144	-0.216606287435367	68	0.0760309736338738	0.768085788562943	0.0520520520520521	0.380037455824709
chr1cre4146	-0.0844994535506694	55	0.539632043847128	0.935444017563829	0.626	0.890383559346198
chr1cre4152	0.152702605920893	57	0.256793042564514	0.869770741015067	0.145	0.559446403385049
chr1cre4154	-0.224271979731073	33	0.209578713748342	0.850971585991502	0.149269311064718	0.56565339460433
chr1cre4162	-0.0512387249848725	54	0.712904719078106	0.964387229698157	0.626626626626627	0.890722756437103
chr1cre4164	0.0203454680699145	94	0.845676761831728	0.982531219642758	0.819	0.954012177281437
chr1cre4186	0.122798336666668	75	0.293910578508454	0.880158966929115	0.309	0.723325061247024
chr1cre4188	-0.0710320275387437	66	0.570878755740922	0.943469471599968	0.53	0.851293724340731
chr1cre4191	-0.282586526315649	51	0.0445161770650171	0.748137929864844	0.021105527638191	0.260035494022362
chr1cre4194	-0.0120898922418441	72	0.919713684007885	0.991110047525296	0.92	0.981870193941377
chr1cre4207	-0.0517194297400568	93	0.622473217834038	0.95088654182396	0.615	0.886077517733509
chr1cre4213	-0.208351940421587	60	0.110148910792369	0.784711707993542	0.116	0.517035452419122
chr1cre4220	-0.0794858875399043	73	0.503836846950098	0.927455042974312	0.463	0.81813341182109
chr1cre4224	0.0422327303442119	55	0.759491246513456	0.971408658907065	0.722613065326633	0.925092874036688
chr1cre4227	-0.057676796922383	63	0.653430107655483	0.954778301086756	0.604604604604605	0.882278986582058
chr1cre4252	0.0155713945289017	53	0.911882017220206	0.99048348457516	0.88855421686747	0.974005121050318
chr1cre4256	0.167658218138206	43	0.282535325458213	0.878394307654025	0.240890688259109	0.667567795779709
chr1cre4257	-0.0311458908822176	83	0.779848026944701	0.973613148946091	0.79	0.945762748952661
chr1cre4268	0.0288675134594813	49	0.843908150027827	0.982531219642758	0.825301204819277	0.956092278951873
chr1cre4274	-0.152181691204487	58	0.254115963454737	0.868749416893769	0.18	0.604004115307758
chr1cre4276	-0.271307202995017	60	0.0360083594753784	0.742698467893471	0.022	0.265080785507487
chr1cre4279	-0.139443337755679	55	0.309935300070226	0.885172664138684	0.225	0.653020372541134
chr1cre4282	-0.0199667497691917	44	0.897639108989634	0.989458735213553	0.879	0.971292265393148
chr1cre4300	0.0611060820109001	63	0.634254568219618	0.951395502212748	0.654	0.901044707373244
chr1cre4307	0.118905604399471	60	0.3655290744467	0.902447256283414	0.35506519558676	0.755386505728928
chr1cre4312	-0.307705122707536	44	0.0421618270798228	0.744093479806719	0.0201612903225806	0.255262961442275
chr1cre4313	-0.0568585786820254	75	0.628008686933441	0.95088654182396	0.748	0.933059347028236
chr1cre4324	0.053611096424751	49	0.714474715083857	0.964387229698157	0.682779456193353	0.911844099924038
chr1cre4341	-0.0325982985146394	52	0.818545386175915	0.98006059884944	0.788577154308617	0.945570097090123
chr1cre4356	0.216692209295166	81	0.0520074820105695	0.750292020374991	0.024	0.276167597408312
chr1cre4358	-0.0116286931507741	59	0.930342866052644	0.992367427167827	0.911911911911912	0.980048230635197
chr1cre4360	0.124090341534178	62	0.336590231529305	0.894716132037755	0.216	0.644462317922736
chr1cre4362	0.201849559273388	74	0.0845969732987923	0.774377743553616	0.064	0.413086369950336
chr1cre4369	0.219668657778486	79	0.051754856576191	0.750292020374991	0.037	0.330597537881557
chr1cre4378	0.134129546545696	70	0.268288161026527	0.8718864610281	0.215	0.643567539424104
chr1cre4384	0.0871831539791056	75	0.457018823133035	0.92088242312396	0.427	0.798698903740956
chr1cre4391	-0.126740954757984	67	0.306769133637769	0.884721234873919	0.257	0.681176414511983
chr1cre4392	-0.147199077927032	65	0.241953917253854	0.862795841560311	0.172	0.5944848583656
chr1cre4393	0.14638501094228	29	0.448614000747342	0.92088242312396	0.367597765363128	0.764057316692477
chr1cre4403	0.329304531722264	80	0.00285716367207984	0.718813047186448	0.001	0.0476979678985569
chr1cre4409	-0.0550551243350019	63	0.668242612541486	0.958152690000879	0.605	0.882278986582058
chr1cre4418	0.0336044660976029	54	0.809375830466316	0.978006043570085	0.788	0.945226593111253
chr1cre4439	0.244343912075626	37	0.144986748986163	0.807252927183443	0.0682730923694779	0.423850973277053
chr1cre4445	0.184654539074733	88	0.0850170599725153	0.77446825804086	0.074	0.437169270425135
chr1cre4447	0.3297166531265	47	0.0236198861774534	0.729726480868395	0.025	0.280458266104775
chr1cre4452	-0.136094431892133	50	0.345994402832658	0.897774881131729	0.401606425702811	0.784480609362505
chr1cre4453	0.177702675079418	68	0.147121910009558	0.807252927183443	0.086	0.462920083788244
chr1cre4466	0.0891129072758785	66	0.476748572897106	0.924656330290939	0.372	0.766418513119533
chr1cre4472	0.225462505678146	50	0.115422000521292	0.788952436335365	0.043	0.35096842034342
chr1cre4473	0.149336922772375	58	0.263205816526778	0.870538929276585	0.272	0.693440440131979
chr1cre4480	0.00872151986308061	59	0.947728829955247	0.99375255217882	0.937	0.98581988436868
chr1cre4481	0.331574568791045	76	0.00343406079062293	0.718813047186448	0.002	0.0755549873125392
chr1cre4485	-0.037793252740016	59	0.776267985202386	0.973123730551194	0.763289869608826	0.938285093267183
chr1cre4512	0.158168660035182	73	0.181386191991597	0.833693567555522	0.091	0.473088457341553
chr1cre4515	-0.0711342994029579	35	0.684692897850217	0.960326057797309	0.655555555555556	0.901727183942748
chr1cre4527	-0.1532880668895	85	0.161329562543829	0.814774348212282	0.085	0.461130267892843
chr1cre4530	0.0716817229307399	58	0.592845850505754	0.948313809252221	0.672	0.907936221654843
chr1cre4534	0.0714388334171925	97	0.48683035264202	0.925029378317644	0.582	0.87323040583877
chr1cre4538	-0.10870825866371	75	0.353208445940948	0.899845035856364	0.282	0.702214551567696
chr1cre4544	0.00540832961736147	43	0.972542265412631	0.996632929694835	0.975903614457831	0.994640604485571
chr1cre4559	0.128430338616996	78	0.262457591343984	0.870538929276585	0.212	0.640419852698888
chr1cre4560	0.0710218981411243	46	0.639047818329518	0.951951702895914	0.608216432865731	0.883649203380784
chr1cre4568	-0.111101967292546	63	0.386011193501246	0.908268411301612	0.289	0.707956914232891
chr1cre4573	-0.111499476729979	81	0.321689262130652	0.888953028913872	0.289	0.707956914232891
chr1cre4575	-0.0317897938592414	94	0.761001050944644	0.971987322939362	0.711	0.921272746025319
chr1cre4584	-0.185167043114587	65	0.139755733426434	0.805897592989827	0.133	0.54325910672784
chr1cre4589	0.0677131457127158	59	0.610351618974378	0.950577824844073	0.631	0.892175461851407
chr1cre4592	-0.0259919329227053	57	0.847805143244993	0.982867529690629	0.864	0.966980539663057
chr1cre4599	-0.0506671004415594	79	0.657443175257572	0.955735964622908	0.695	0.915818386651905
chr1cre4600	-0.197047479405554	86	0.0689912638115035	0.759101032601243	0.033	0.314952774244434
chr1cre4602	-0.0668550696666756	71	0.579611644485473	0.946332584529477	0.484	0.829441113912283
chr1cre4605	-0.152110979876737	87	0.159583201058716	0.814774348212282	0.163	0.583091750859505
chr1cre4608	-0.266183901887196	77	0.0192870753919585	0.729726480868395	0.002	0.0755549873125392
chr1cre4634	-0.233248723292175	67	0.0574875097311215	0.753478616984927	0.007	0.15455140261861
chr1cre4639	0.0164882830549458	60	0.900492302069212	0.989879630210833	0.88	0.971596489857563
chr1cre4651	0.125680441251479	70	0.299874631484702	0.881931203604502	0.303	0.718678456052024
chr1cre4655	0.0659545662226792	80	0.56106211100705	0.939722520589907	0.547	0.858981750337957
chr1cre4657	-0.136437300163872	91	0.197197744832243	0.842561755892671	0.261	0.68464246211479
chr1cre4660	-0.022411673409695	74	0.849674276895434	0.983129299397297	0.828	0.956741958999584
chr1cre4667	-0.206320977507948	53	0.138281065414033	0.803756625613929	0.112	0.511027509655307
chr1cre4679	-0.180625254672437	41	0.25842373677894	0.869770741015067	0.248746238716148	0.67464872636649
chr1cre4685	0.0770980858097306	70	0.525833112953969	0.932006546669786	0.524	0.848738826405186
chr1cre4690	-0.109392806267924	82	0.327912892772578	0.890497582457933	0.415	0.79201524741891
chr1cre4696	-0.189025952035271	77	0.0996720963660993	0.780492258060468	0.161	0.58089948091733
chr1cre4700	-0.140372199028732	52	0.320925770346759	0.888953028913872	0.39518555667001	0.780518051458471
chr1cre4705	-0.242857192025218	68	0.0459876654862645	0.748137929864844	0.101101101101101	0.492697196938332
chr1cre4721	-0.158712980533447	51	0.265963202935494	0.870538929276585	0.24	0.666779805392655
chr1cre4723	0.0603283681459093	76	0.604677321615099	0.949003440632612	0.694	0.915428840305809
chr1cre4731	-0.103354917625113	69	0.398047980453102	0.912073402715042	0.405	0.786164882141202
chr1cre4732	0.218364792521902	72	0.0653632782334843	0.755474869297024	0.014	0.217374833518445
chr1cre4739	0.087297549278466	77	0.450281192952008	0.92088242312396	0.559	0.864210886617109
chr1cre4742	0.00510856099894394	50	0.97191266142972	0.996632929694835	0.96996996996997	0.99347480426466
chr1cre4744	-0.130767450891392	82	0.241595988844441	0.862795841560311	0.231	0.658323702141603
chr1cre4745	-0.2503363710163	44	0.101222940297517	0.780492258060468	0.0575757575757576	0.396995814961421
chr1cre4749	0.285566839579911	87	0.00733717982326933	0.722088729034198	0.001	0.0476979678985569
chr1cre4754	0.078680436784176	72	0.511206110338405	0.928688240495249	0.556	0.862872479045423
chr1cre4770	0.263518690661927	80	0.0181866207655435	0.729726480868395	0.019	0.248270097536197
chr1cre4780	0.0486695303623425	77	0.674239082901706	0.958871336806568	0.632	0.892581092953055
chr1cre4781	0.115588547451819	58	0.387568962198843	0.908614790599679	0.323232323232323	0.733551781040842
chr1cre4782	0.115486094687324	60	0.379575508723106	0.906891216928568	0.21021021021021	0.63843027526927
chr1cre4791	-0.0861803672707292	59	0.516332144654726	0.928688240495249	0.424	0.797060784748393
chr1cre4793	0.112623783939648	67	0.364190885213557	0.902447256283414	0.24	0.666779805392655
chr1cre4797	0.102519591144104	70	0.398376337086983	0.912073402715042	0.466	0.819676896111843
chr1cre4798	-0.258223297639615	42	0.0987158516771195	0.780345632291252	0.0512048192771084	0.377688849205944
chr1cre4805	-0.107565411644661	59	0.417420675152164	0.915510797387374	0.38	0.771490408499177
chr1cre4806	0.1196017452414	79	0.293776233320536	0.880158966929115	0.293	0.710942351300118
chr1cre4811	-0.0582660640682198	64	0.647433607126282	0.954224180778527	0.691	0.914590782629733
chr1cre4818	-0.200531712898188	52	0.154033527434027	0.811179623881527	0.0480961923847695	0.368169449568934
chr1cre4834	-0.11922149321759	93	0.255017866351441	0.869096420328868	0.459	0.815791029604401
chr1cre4847	0.102519591144104	70	0.398376337086983	0.912073402715042	0.384	0.773789701304565
chr1cre4853	-0.0871831539791056	75	0.457018823133035	0.92088242312396	0.463	0.81813341182109
chr1cre4854	0.128718886305932	74	0.27440042239385	0.875004171694928	0.214	0.64248489139863
chr1cre4858	-0.021324336929519	50	0.883140969959837	0.987514862363118	0.877877877877878	0.971057190181809
chr1cre4875	0.0140102313987298	82	0.900581754736213	0.989883351852832	0.887	0.973428584369995
chr1cre4877	-0.179687260925714	48	0.221680940794003	0.85383789891051	0.189134808853119	0.614387004841895
chr1cre4878	-0.151368211366639	38	0.364317607579563	0.902447256283414	0.278306878306878	0.699218950570322
chr1cre4883	0.0491143759444935	40	0.763446302321923	0.971987322939362	0.807422266800401	0.951032544840676
chr1cre4887	0	37	1	1	0.989473684210526	0.996933230021108
chr1cre4889	-0.0847171332191052	61	0.516246508695318	0.928688240495249	0.615	0.886077517733509
chr1cre4891	-0.0328006844351503	67	0.792162566086189	0.975748376007797	0.773	0.940976658891082
chr1cre4909	-0.0555640600417218	70	0.647768097905173	0.954224180778527	0.553	0.861646436806953
chr1cre4918	0.00571412245597634	85	0.958606784415842	0.994789086403262	0.963	0.992141046473838
chr1cre4919	-0.0778726504145885	81	0.489558622822232	0.925136364838715	0.387	0.775481453475664
chr1cre4920	-0.141655008297996	63	0.268107098469805	0.8718864610281	0.275551102204409	0.696710315983747
chr1cre4921	-0.0905902155530915	75	0.439552849342876	0.919022022438055	0.559	0.864210886617109
chr1cre4923	-0.23111567640413	70	0.0542312216861111	0.752521174222688	0.015	0.223633667006159
chr1cre4926	0.0146064022791561	61	0.911041057278593	0.99048348457516	0.901901901901902	0.977405589825993
chr1cre4932	-0.189381660165583	58	0.154500863442104	0.811179623881527	0.117	0.518704944387082
chr1cre4934	-0.0314561075750389	34	0.85982110620713	0.984332764767006	0.825102880658436	0.95590496615322
chr1cre4935	-0.130440375747036	54	0.347149140434493	0.898087081252259	0.318	0.729678854336488
chr1cre4954	-0.0584877358810385	58	0.662759424113138	0.956884456729695	0.688376753507014	0.913971792149924
chr1cre4956	0.0330257527458753	77	0.775538790303275	0.973123730551194	0.754	0.935158278852764
chr1cre4957	0.0418300756959316	77	0.717941074402922	0.964746236135092	0.661	0.903725632612919
chr1cre4960	0.0856426699089595	53	0.542032233502017	0.936472194280859	0.472	0.823153439588689
chr1cre4961	0.057122136316451	67	0.646132948909318	0.954084070639213	0.513	0.843685732765049
chr1cre4966	-0.122487051556404	80	0.279076216728319	0.876524745580822	0.159	0.578309221531203
chr1cre4971	-0.136099909933368	63	0.287516343810115	0.879449563822182	0.234	0.661129863314925
chr1cre4972	0.0314337198287946	72	0.79322841989651	0.975748376007797	0.728	0.926749980476528
chr1cre4975	-0.0928690118473082	75	0.428083450512045	0.917367933278805	0.31	0.724116792342389
chr1cre4977	0.126710672998188	57	0.347605669790118	0.898087081252259	0.273	0.694291224371079
chr1cre5000	-0.156987357535451	59	0.235061207144394	0.86102533186605	0.232	0.659262649956437
chr1cre5004	-0.114534259154422	66	0.359813427435109	0.902350825239491	0.313313313313313	0.726746509084647
chr1cre5008	-0.185403433895706	56	0.171301523120914	0.823616503093174	0.098	0.487209192572074
chr1cre5010	NA	NA	NA	NA	NA	NA
chr1cre5013	-0.0953959055089829	65	0.449703417002954	0.92088242312396	0.355355355355355	0.755837888366498
chr1cre5023	-0.0520918125085354	82	0.642085057169428	0.953370246777767	0.535	0.853729776774163
chr1cre5034	0.218001429444359	70	0.069837605990801	0.7628157992923	0.017	0.236227142463168
chr1cre5036	-0.152296964228831	80	0.177456320909347	0.829957598734659	0.268	0.690162515089168
chr1cre5062	0.0453687010994487	54	0.744607948956928	0.968979648773334	0.666666666666667	0.905865233232216
chr1cre5084	NA	NA	NA	NA	NA	NA
chr1cre5102	-0.142735820420942	63	0.26443533682351	0.870538929276585	0.256	0.680205481705454
chr1cre5107	-0.0180775381515547	69	0.882791043702459	0.987514862363118	0.853	0.96396309252522
chr1cre5116	0.0316623793430652	41	0.844205096535868	0.982531219642758	0.83298755186722	0.958275732725583
chr1cre5117	-0.25174069775905	57	0.0588863960405304	0.753478616984927	0.0160320641282565	0.230210720124511
chr1cre5130	0.069438729557841	63	0.588666493313432	0.947453382262888	0.545	0.857970046596246
chr1cre5132	-0.166688349704118	62	0.195363281241841	0.842354615042379	0.112	0.511027509655307
chr1cre5143	-0.302940637694423	52	0.0290348363814651	0.736840994681093	0.0130784708249497	0.21028837034341
chr1cre5153	0.00826262888026393	71	0.945477170805489	0.993641575457194	0.952	0.989566548686126
chr1cre5164	0	55	1	1	0.995	0.99742297076051
chr1cre5166	-0.145180175548748	62	0.260223567432426	0.870538929276585	0.298	0.714690112065613
chr1cre5175	-0.16289594138375	37	0.335395353482213	0.894704164689112	0.233739837398374	0.661129863314925
chr1cre5182	-0.022411673409695	74	0.849674276895434	0.983129299397297	0.822	0.954922646976225
chr1cre5184	-0.0272639270636399	83	0.806716045669924	0.977198617234624	0.79	0.945762748952661
chr1cre5188	-0.00598558809256956	75	0.959352207718109	0.99486557647765	0.954	0.990013271615325
chr1cre5192	0.135294397707677	56	0.320127434943558	0.888894525044822	0.228228228228228	0.656091118025946
chr1cre5193	0.01131615667482	67	0.927582797947481	0.991990657804029	0.910910910910911	0.979768232750148
chr1cre5201	-0.246467871097337	56	0.0670768297633076	0.755474869297024	0.0460921843687375	0.361275559715419
chr1cre5204	0.0522727272727273	65	0.679209629192429	0.959160635212095	0.632	0.892581092953055
chr1cre5208	0.05926955847702	71	0.623439481308299	0.95088654182396	0.478	0.826394271151886
chr1cre5211	-0.0203502130138547	59	0.878410695551583	0.986812136642905	0.843530591775326	0.961577047352263
chr1cre5214	0.0388813338081528	46	0.797529525402448	0.976163986209718	0.762	0.937745316059375
chr1cre5225	-0.0877227736141303	57	0.516420933738742	0.928688240495249	0.51	0.842340138451994
chr1cre5226	-0.0489187163986694	75	0.676837416968141	0.958975982920198	0.679	0.910542795695524
chr1cre5234	-0.0595280279292238	84	0.590655883963835	0.948047555585759	0.609	0.883773142067502
chr1cre5242	-0.153037850038553	56	0.26014480949852	0.870538929276585	0.167	0.588290096135913
chr1cre5251	-0.0517030567750775	47	0.729985693352031	0.967060317908666	0.635721493440969	0.894131500853794
chr1cre5264	0.197948663722157	49	0.172754962035818	0.825460300313496	0.111111111111111	0.509539539404209
chr1cre5278	-0.064470178694391	57	0.633752507061616	0.951323600272485	0.68	0.910821549433149
chr1cre5283	0.0312786495797116	38	0.85211618002763	0.983332549590405	0.848331648129424	0.962820493274892
chr1cre5292	0.0439874647320598	72	0.71370007628633	0.964387229698157	0.773	0.940976658891082
chr1cre5306	-0.00716618657773789	63	0.955547723819005	0.994413547283421	0.97	0.99347480426466
chr1cre5317	-0.0852452134227093	56	0.53218923900607	0.933825152845192	0.449	0.810594010293311
chr1cre5326	-0.00774209661138764	51	0.956999136805184	0.994432841721336	0.934673366834171	0.985378332194122
chr1cre5327	0.102809765521474	68	0.404119244476108	0.913535318671315	0.600600600600601	0.880670742991305
chr1cre5328	0.00611646536181312	89	0.954634872358476	0.994386490863872	0.961	0.991607516152976
chr1cre5335	0.204018024015904	38	0.219217411031037	0.851207291772597	0.122718052738337	0.528251680783986
chr1cre5358	0.0309294787065871	55	0.822629573394604	0.980100412970776	0.832	0.957976564515472
chr1cre5365	-0.0265298416560023	54	0.848975729763112	0.983095615761145	0.773319959879639	0.941200914878972
chr1cre5366	-0.046926950861121	52	0.741134702984752	0.968578214999024	0.719315895372233	0.924147712007749
chr1cre5368	0.00227941875849984	46	0.988004803893555	0.998340898796988	0.986986986986987	0.996322848095992
chr1cre5389	0.0327873747740981	53	0.815709733010686	0.979668107478792	0.761	0.937399806079798
chr1cre5414	0.270918484782462	55	0.0454330377672858	0.748137929864844	0.013	0.210173668696643
chr1cre5417	-0.115765752283261	51	0.418536830910106	0.915700944600554	0.333667334669339	0.740928356413039
chr1cre5432	-0.144232436127838	56	0.288894234021977	0.880158966929115	0.211907164480323	0.640419852698888
chr1cre5451	-0.0945181272905181	54	0.496608345006201	0.927455042974312	0.337337337337337	0.743280960048884
chr1cre5452	0.182767434820886	66	0.141875219670241	0.807252927183443	0.119	0.521849230769231
chr1cre5464	0.0978060467236853	70	0.42052898834357	0.915996549435525	0.373373373373373	0.767527801483525
chr1cre5472	-0.130395190747317	74	0.268146552985005	0.8718864610281	0.176	0.599002177293935
chr1cre5473	0.0365073874398771	44	0.813999564023756	0.979050958530361	0.799184505606524	0.948680153538979
chr1cre5486	0.301046926077448	49	0.0355566303747048	0.742698467893471	0.0170340681362725	0.236227142463168
chr1cre5488	-0.0409247366193791	48	0.782412368990586	0.974198484890047	0.744209466263847	0.932003336221547
chr1cre5491	-0.0490018955832424	45	0.749228567961402	0.969697267606522	0.720440881763527	0.924420328091926
chr1cre5492	0.119951260753092	67	0.333612606402134	0.894097608599367	0.315	0.72764847692402
chr1cre5495	-0.109132630985011	48	0.460288258388774	0.921327984336084	0.45045045045045	0.811552611894771
chr1cre5498	-0.0605551097264313	67	0.626411301292076	0.95088654182396	0.523	0.848211782030992
chr1cre5500	0.00836296595249248	84	0.939816362393673	0.992714621349951	0.957	0.99076526818906
chr1cre5507	-0.170408718179768	63	0.181784033506297	0.8338984412557	0.0787878787878788	0.448289581102784
chr1cre5513	-0.118591385645001	56	0.384017223100889	0.908268411301612	0.301301301301301	0.717650226132657
chr1cre5514	-0.10092383415602	39	0.540983017869415	0.935827262715773	0.475076297049847	0.824989403230921
chr1cre5518	-0.0340478960256776	38	0.839187572409625	0.982037240005048	0.806646525679758	0.950775990941551
chr1cre5519	0.00530596833120046	54	0.96962497250181	0.996482686249376	0.967967967967968	0.993168714421396
chr1cre5527	-0.206455890592716	52	0.141980236945708	0.807252927183443	0.065	0.415532924146635
chr1cre5537	-0.148782489964319	66	0.233155538215668	0.86102533186605	0.213	0.641492577334233
chr1cre5538	0.18754934643794	68	0.125640023258486	0.794975084723921	0.095	0.481259744914723
chr1cre5541	-0.20094275279244	68	0.100361775178721	0.780492258060468	0.191	0.616267461880166
chr1cre5556	-0.202620561610943	57	0.13063860913531	0.799191632273052	0.167	0.588290096135913
chr1cre5557	-0.30224722241676	37	0.069035919425189	0.759101032601243	0.0515247108307045	0.379577902944936
chr1cre5563	-0.0858742005654648	50	0.553207296334925	0.939453108943178	0.516	0.845097397278105
chr1cre5570	-0.185177784237745	58	0.164031087919866	0.814774348212282	0.077	0.443972423418429
chr1cre5572	-0.123871306804882	78	0.279916538588868	0.876948108330973	0.214	0.64248489139863
chr1cre5574	-0.171440255188442	83	0.121212161279952	0.790202418982706	0.081	0.45289555929186
chr1cre5580	-0.216212782877597	47	0.144373905815475	0.807252927183443	0.0982948846539619	0.488024318858214
chr1cre5584	0.25568369064112	49	0.0761978196600865	0.768211870251391	0.0521564694082247	0.380447695501454
chr1cre5603	0.162520901665788	49	0.264544131854476	0.870538929276585	0.18932527693857	0.614770226095067
chr1cre5607	0.104586664471982	92	0.321115377455308	0.888953028913872	0.251	0.676291840090233
chr1cre5613	0.0812897019324939	61	0.533422315460536	0.933947633902437	0.424424424424424	0.797580171042108
chr1cre5617	0.104814126992908	61	0.42145082757567	0.916231874736676	0.334334334334334	0.741456769154165
chr1cre5623	0.0449083995894983	42	0.777637593976009	0.973123730551194	0.782077393075356	0.943765910035423
chr1cre5627	NA	NA	NA	NA	NA	NA
chr1cre5628	NA	NA	NA	NA	NA	NA
chr1cre5629	NA	NA	NA	NA	NA	NA
chr1cre5646	0.00751452458402351	87	0.94492752665887	0.993578779097698	0.958	0.990947646405875
chr1cre5648	-0.12787765607847	64	0.31393472516984	0.886524761466403	0.249	0.67464872636649
chr1cre5663	-0.0145613977374746	80	0.897992228396943	0.989458735213553	0.929	0.983928216710797
chr1cre5667	0.142856345387184	81	0.203280640956905	0.847641264742617	0.172	0.5944848583656
chr1cre5677	0.051528638736658	72	0.667291286933015	0.957817084120793	0.727	0.926450647501475
chr1cre5696	-0.133195534162514	55	0.332323573666736	0.893492137939268	0.259	0.683119901093262
chr1cre5710	-0.044086015653955	82	0.694113850911696	0.961979216235585	0.62	0.888027091963196
chr1cre5722	0.0693714055585304	32	0.705975916838345	0.963233120793053	0.633946830265849	0.893371058731649
chr1cre5726	0.018902004429463	50	0.896338303046923	0.989273194718204	0.871871871871872	0.969243844414589
chr1cre5733	-0.0355819397560918	83	0.749459724698479	0.969697267606522	0.794	0.946945277340234
chr1cre5734	-0.0860662965823871	31	0.645257492988693	0.95368926285817	0.592746113989637	0.87743533527595
chr1cre5748	-0.0754336509141357	89	0.482316620218757	0.924850498140027	0.512	0.843305354974361
chr1cre5749	-0.0166493326352823	73	0.888812973797261	0.988691010091683	0.907	0.97876821811472
chr1cre5751	-0.309686051975077	78	0.00579618155742183	0.722088729034198	0.002	0.0755549873125392
chr1cre5759	0.0529415035940877	73	0.656437247021615	0.955735964622908	0.753	0.934775915766668
chr1cre5795	0.0197092276774116	84	0.858763295276871	0.984332764767006	0.855	0.964584322803376
chr1cre5801	-0.169138646503069	68	0.167940472504398	0.820442127410169	0.222	0.649890774143437
chr1cre5811	-0.0311676242287116	85	0.777050002510882	0.973123730551194	0.763	0.938010351013899
chr1cre5813	0.102868899974728	55	0.454846697371921	0.92088242312396	0.408817635270541	0.788487675405941
chr1cre5816	0.0759832877626153	86	0.486845277172059	0.925029378317644	0.482	0.828512607937731
chr1cre5821	-0.159380553595305	50	0.268912167148036	0.872161148542849	0.165	0.585663325101503
chr1cre5823	-0.0399361531915436	65	0.752113154830952	0.970279700427022	0.781	0.943479441712045
chr1cre5824	-0.125304970776644	64	0.323849622282231	0.889086479970941	0.238	0.664893804872424
chr1cre5830	0.262237289384017	56	0.0508834202250355	0.750292020374991	0.00401203610832497	0.114389060801204
chr1cre5834	-0.0690225813823783	67	0.578891555553176	0.945909828275342	0.531	0.851714207353115
chr1cre5843	0.127847016273136	56	0.347729645997471	0.898087081252259	0.31	0.724116792342389
chr1cre5846	-0.10612625794313	67	0.392689204368378	0.911090656306438	0.326	0.735385063510009
chr1cre5865	-0.17486599879519	53	0.21043751052452	0.850971585991502	0.144869215291751	0.559446403385049
chr1cre5868	-0.049789794597605	77	0.667177892923054	0.957817084120793	0.633	0.893030378399062
chr1cre5869	-0.132424438394346	91	0.210823325644365	0.850971585991502	0.224	0.651852644944321
chr1cre5871	0.15212162663769	90	0.152337314386823	0.811179623881527	0.107	0.503057797859955
chr1cre5878	-0.070125580374498	75	0.549945503926573	0.938636488142964	0.581	0.872892193078034
chr1cre5885	0.0750700048987985	73	0.527896927638444	0.932769359680636	0.484	0.829441113912283
chr1cre5898	0.067972821922226	83	0.541479541392658	0.936281681002407	0.484	0.829441113912283
chr1cre5909	-0.086396666196467	48	0.5592950367234	0.939722520589907	0.521	0.847187285057225
chr1cre5917	0.116063960308993	67	0.349627514639247	0.898087081252259	0.244	0.67028910647327
chr1cre5928	-0.0465147726030966	59	0.726465044669862	0.966710664781217	0.663991975927783	0.904763949256441
chr1cre5932	0.115403519661362	61	0.375807332296353	0.905763231042789	0.312	0.725580698903721
chr1cre5936	0.105166096409924	61	0.419884660027473	0.915996549435525	0.326	0.735385063510009
chr1cre5950	-0.120115267912003	56	0.377892753880328	0.906088837342618	0.324	0.733889684278006
chr1cre5952	0.0300671538768026	54	0.829123088489131	0.980757101922383	0.785425101214575	0.944567833089468
chr1cre5960	-0.0165252577605279	71	0.891203098978558	0.988872943088085	0.903	0.977708353150347
chr1cre5975	-0.107492426936689	76	0.355357118836933	0.900068703974386	0.29	0.708722666916432
chr1cre5992	0.0077919060571779	85	0.943576648678862	0.993200697828367	0.929	0.983928216710797
chr1cre5999	0.193486368486041	76	0.0939959257824066	0.779251572096576	0.121	0.525154398311048
chr1cre6001	-0.0136293255127276	39	0.934368730885982	0.992396700231245	0.920523138832998	0.982010517779007
chr1cre6005	-0.142464204115506	57	0.290440453432504	0.880158966929115	0.197	0.62348654549526
chr1cre6024	0.113233907502211	74	0.336760569612932	0.894716132037755	0.192	0.617532063377677
chr1cre6049	-0.0431587761145194	85	0.694913718331477	0.962053931154953	0.798	0.94817200564665
chr1cre6058	0.271250832261481	46	0.0682372309506269	0.759101032601243	0.0291457286432161	0.299611766137412
chr1cre6105	-0.0837164026966474	68	0.497304375476666	0.927455042974312	0.526	0.849539339110561
chr1cre6113	0.127595158197248	90	0.23073834634048	0.861021618850879	0.188	0.613019591256032
chr1cre6121	0.0448432677211556	91	0.672969249857304	0.958808215962947	0.679	0.910542795695524
chr1cre6128	0.075	65	0.552663260926513	0.939310279954555	0.561	0.865035875662554
chr1cre6131	0.111371306827975	69	0.36226519054822	0.902447256283414	0.246	0.672287820559302
chr1cre6159	-0.0568220953203952	69	0.642825530084739	0.953370246777767	0.685	0.912581820895405
chr1cre6180	-0.152424857062971	62	0.236929991227267	0.86102533186605	0.241	0.667567795779709
chr1cre6190	-0.113574921964591	43	0.46835012442339	0.922698435889669	0.40320962888666	0.78537269037252
chr1cre6193	-0.0609356434561173	60	0.643718102303948	0.953370246777767	0.634634634634635	0.893755425356227
chr1cre6207	-0.0812167891234844	55	0.555552501090669	0.939722520589907	0.58391959798995	0.873954258285392
chr1cre6214	-0.106657449025058	42	0.501404902155297	0.927455042974312	0.426113360323887	0.798345087676376
chr1cre6215	0	53	1	1	0.983	0.995624277025151
chr1cre6217	0.0892274723309612	66	0.476179840105867	0.9244941630001	0.394	0.7795609349207
chr1cre6221	0.140425251777942	67	0.257035392802154	0.869770741015067	0.18	0.604004115307758
chr1cre6224	0.0340338237390564	36	0.843785918824341	0.982531219642758	0.813508064516129	0.952814606741573
chr1cre6229	-0.0620336041093151	72	0.604696001971064	0.949003440632612	0.611	0.884465686546463
chr1cre6233	0.0269130517076627	44	0.862326832410915	0.984887921787682	0.848637739656912	0.962820493274892
chr1cre6234	-0.154390286787219	60	0.238867235307245	0.861421044760118	0.171342685370741	0.594004553811437
chr1cre6239	-0.177783119577865	51	0.211986784607843	0.850971585991502	0.0981963927855711	0.487656659673093
chr1cre6246	0.0656013688703006	67	0.597892359346312	0.949003440632612	0.527	0.849952471745033
chr1cre6247	0.0875944757852841	60	0.505723161097994	0.927864859596085	0.414	0.791420356176736
chr1cre6249	-0.15531039968327	58	0.244367003473364	0.864237345326302	0.184	0.6084578068944
chr1cre6251	-0.0664596718492366	48	0.653571858894424	0.954778301086756	0.527054108216433	0.849991240462468
chr1cre6270	0.0374532508840649	66	0.765273648438586	0.972224382056278	0.717717717717718	0.923572667528754
chr1cre6282	0.175292397864722	79	0.122300359829365	0.790779667342949	0.053	0.383180770413544
chr1cre6288	0.0925568204242456	62	0.47430043848404	0.923741725920751	0.406	0.786750828363154
chr1cre6296	0.0706918795863224	56	0.604649051398848	0.949003440632612	0.621865596790371	0.888838707503054
chr1cre6306	-0.258454279413698	48	0.0761134473259925	0.768211870251391	0.0651955867602808	0.416029675300263
chr1cre6308	0.0865332738777835	43	0.581117843110676	0.946642361429292	0.496482412060302	0.835981259361171
chr1cre6309	-0.0649734312987875	55	0.637436010399357	0.951598092055782	0.605210420841683	0.882460646731063
chr1cre6312	-0.123717914826348	55	0.368170125425045	0.903252631505299	0.276	0.696710315983747
chr1cre6323	0.273557774940739	90	0.00908376521830719	0.722088729034198	0.003	0.0967357026216019
chr1cre6336	-0.00984427448753823	96	0.924161853309515	0.991325786635821	0.946	0.98810490595785
chr1cre6340	-0.0706502157919775	74	0.549734870649711	0.938601658517586	0.494	0.834287390029326
chr1cre6349	0.186081038348013	91	0.0773924335118695	0.769869389768912	0.022	0.265080785507487
chr1cre6361	-0.0166652950938818	63	0.89685378503545	0.989273194718204	0.903	0.977708353150347
chr1cre6363	-0.147519495316037	82	0.185972741007191	0.835698334092435	0.244	0.67028910647327
chr1cre6391	0.0511600238701734	68	0.678635113550588	0.959160635212095	0.594594594594595	0.878222495877047
chr1cre6394	0.277112098396289	82	0.0117221126645276	0.722088729034198	0.014	0.217374833518445
chr1cre6397	0.216746521050937	82	0.0504757347159483	0.750292020374991	0.007	0.15455140261861
chr1cre6419	0.125443015128795	58	0.348109714621463	0.898087081252259	0.293293293293293	0.711282578371548
chr1cre6435	0.0571255135636404	81	0.612468797032311	0.950871470834583	0.613	0.885233924253261
chr1cre6436	0.0555770014376728	41	0.729998079908179	0.967060317908666	0.700102354145343	0.917677091607881
chr1cre6440	-0.262801589821971	52	0.0598013634430604	0.755474869297024	0.0380761523046092	0.334062050955151
chr1cre6452	0.0457048700801615	62	0.724282616353602	0.965742969696851	0.671671671671672	0.907936221654843
chr1cre6454	0.0626735273718832	75	0.593218412414519	0.948462634122207	0.542	0.856690450228796
chr1cre6457	0.22831777398962	70	0.0572966338063277	0.753478616984927	0.04	0.340896799029679
chr1cre6460	0.0341731970480346	70	0.778827417597726	0.973123730551194	0.746	0.932515807589264
chr1cre6462	0.248456644676482	46	0.0959204166377431	0.779251572096576	0.073293172690763	0.435847736944517
chr1cre6464	-0.0132067635948844	49	0.928235834140839	0.992247317947225	0.919273461150353	0.981870193941377
chr1cre6471	0.134725198768495	42	0.39495963319125	0.911846979295751	0.277217741935484	0.698105837084208
chr1cre6481	0.0778642533338223	84	0.481423724985868	0.924850498140027	0.345	0.748579534187515
chr1cre6488	-0.0324541202986011	96	0.753595922340359	0.970318477468278	0.766	0.938796146953405
chr1cre6493	0.204327654476016	62	0.111161984803882	0.78516055586574	0.121	0.525154398311048
chr1cre6503	0.0148087219439773	37	0.930678751058612	0.992367427167827	0.90146750524109	0.977405589825993
chr1cre6505	-0.0447395905050418	48	0.762693528533071	0.971987322939362	0.700100300902708	0.917677091607881
chr1cre6508	0.178524336949151	81	0.110805140156347	0.784711707993542	0.028	0.29441558528516
chr1cre6517	0.061374490935058	45	0.688784687995315	0.961026223258833	0.648946840521565	0.899019875933663
chr1cre6521	-0.138150382916552	57	0.30544373828383	0.884204136721101	0.134	0.544680799050917
chr1cre6522	0.00843949472569722	53	0.95217441685439	0.99418872946919	0.946946946946947	0.988397649194603
chr1cre6535	-0.00681818181818182	65	0.957011689809799	0.994432841721336	0.964	0.992369548261787
chr1cre6538	0.0824786098842322	55	0.549406565863344	0.938441635115866	0.517	0.84554360131532
chr1cre6540	0.0703154529618877	87	0.517519018857223	0.928751573354056	0.537	0.854501278340456
chr1cre6553	-0.0988157425802336	69	0.419200267815622	0.915996549435525	0.355	0.755304651629576
chr1cre6560	0.17121985666458	79	0.131364220361042	0.799248061619356	0.076	0.441729814941741
chr1cre6577	0.129926869234491	46	0.389451841557472	0.909858048419999	0.329317269076305	0.737992370744123
chr1cre6579	-0.151997409770354	56	0.263437707536424	0.870538929276585	0.156312625250501	0.574990024293976
chr1cre6583	-0.075163554282043	56	0.581931141185775	0.946642361429292	0.524	0.848738826405186
chr1cre6590	-0.0551985330138224	73	0.642769285489028	0.953370246777767	0.54	0.855806308431956
chr1cre6596	-0.0513543524238425	67	0.679815149589397	0.959160635212095	0.637	0.894446295004216
chr1cre6621	0.0909153525126324	69	0.457515824987911	0.92088242312396	0.394	0.7795609349207
chr1cre6626	-0.0288715236718309	60	0.826666393709618	0.980757101922383	0.82	0.954302025972244
chr1cre6634	0.104652912618818	80	0.355563202207613	0.900140313563145	0.242	0.668470854574179
chr1cre6640	-0.100038245069593	48	0.498713167955568	0.927455042974312	0.456	0.814277655234134
chr1cre6652	0.0153893512983445	59	0.907901826927269	0.99048348457516	0.882	0.972149733384891
chr1cre6657	-0.139857731946379	31	0.453016974103435	0.92088242312396	0.322085889570552	0.732670609355936
chr1cre6660	-0.161846052896611	67	0.190709882835401	0.838161300292811	0.103103103103103	0.496074820618431
chr1cre6662	0.0932954370666449	80	0.410437478012799	0.914428266272763	0.32	0.731058487567014
chr1cre6669	0.12103466546367	49	0.407431141986203	0.914428266272763	0.295295295295295	0.712784500766796
chr1cre6682	-0.309683864455505	51	0.0270057219440668	0.733190683244852	0.0100401606425703	0.184959076954955
chr1cre6687	0.0689081858828936	53	0.623935466984648	0.95088654182396	0.613613613613614	0.885618546662188
chr1cre6730	0.0414272852260675	66	0.741197305906748	0.968578214999024	0.71	0.920965579481532
chr1cre6732	-0.0962384122394364	60	0.46448696192693	0.921708471401675	0.383	0.773230759158408
chr1cre6742	-0.103409573395026	77	0.370799992544175	0.904284646466644	0.426	0.798148803605753
chr1cre6750	0.0609387221022798	64	0.632403731462608	0.950899427553925	0.591	0.876709446339543
chr1cre6769	NA	NA	NA	NA	NA	NA
chr1cre6770	0.0622838880187708	60	0.63638472273067	0.951598092055782	0.6	0.880228705874212
chr1cre6771	-0.175071127782659	87	0.10482715166638	0.782823515976968	0.1	0.490750734240947
chr1cre6773	0.0358368656058932	51	0.80284886659258	0.976939881207257	0.802	0.949399572135032
chr1cre6774	0.150815642723776	59	0.25420841548845	0.868749416893769	0.111	0.509381216516045
chr1cre6776	-0.15180258279683	66	0.223698224914557	0.856427507817601	0.121	0.525154398311048
chr1cre6778	0.035664482654452	52	0.801807724609282	0.976939881207257	0.727	0.926450647501475
chr1cre6784	-0.126762423326259	33	0.482080441837979	0.924850498140027	0.486716259298619	0.830863116704138
chr1cre6787	-0.120766946378027	86	0.268026804994397	0.8718864610281	0.225	0.653020372541134
chr1cre6792	-0.136448499305157	84	0.215853057301474	0.851184974060369	0.192	0.617532063377677
chr1cre6803	0.114942735471785	66	0.358091232046045	0.901515914346109	0.344723618090452	0.748579534187515
chr1cre6816	0.197942494182122	95	0.05450069519551	0.752521174222688	0.063	0.410593825427408
chr1cre6822	0.0384371106798037	79	0.736633028282602	0.968026987589392	0.685	0.912581820895405
chr1cre6826	0.0594903236942879	65	0.637828336687774	0.951598092055782	0.517	0.84554360131532
chr1cre6845	0.360041149911548	55	0.00693376767858757	0.722088729034198	0	0.0476979678985569
chr1cre6847	-0.0889705731354497	87	0.412509027667226	0.914523398872104	0.398	0.781996987916913
chr1cre6850	-0.252927428212456	98	0.0119802344376569	0.722088729034198	0.007	0.15455140261861
chr1cre6851	-0.23007828531583	81	0.0387973945612729	0.742698467893471	0.007	0.15455140261861
chr1cre6863	0.128473656191717	46	0.394822187343858	0.911846979295751	0.31425702811245	0.727503710418627
chr1cre6872	-0.141431621642632	83	0.202173291868154	0.846352967602192	0.113	0.512615864015086
chr1cre6886	0.0283951205065496	56	0.835432854527184	0.981512244326894	0.816	0.95326745603703
chr1cre6887	-0.214736449312796	64	0.0883859879194964	0.77446825804086	0.024	0.276167597408312
chr1cre6889	-0.0972607877569204	88	0.367332497119335	0.903210842472524	0.435	0.803209892000174
chr1cre6891	0.127744594087896	51	0.37168044301646	0.904705341164464	0.261569416498994	0.685446835423512
chr1cre6896	-0.221847177294466	80	0.0479567709519298	0.748137929864844	0.01	0.184959076954955
chr1cre6903	-0.138002013740077	79	0.22518686033093	0.856921223069666	0.204	0.63167837874846
chr1cre6905	-0.133832547520935	82	0.230644076560321	0.860802019284177	0.184	0.6084578068944
chr1cre6920	-0.0420883097430268	45	0.783689974702583	0.974405511737079	0.761224489795918	0.937638877587334
chr1cre6926	0.0264650756413451	54	0.84934012717205	0.983129299397297	0.809428284854564	0.951765011535344
chr1cre6936	0.0360957083216738	52	0.799460627383596	0.976625137189342	0.753	0.934775915766668
chr1cre6977	0.320369581955036	56	0.0160764374718872	0.729726480868395	0.003	0.0967357026216019
chr1cre6980	0.0454804872964739	73	0.702404724793542	0.962552803407408	0.662	0.904090718395317
chr1cre6982	-0.0501693752873216	54	0.718646195786385	0.964746236135092	0.638916750250752	0.89522496468664
chr1cre6984	NA	NA	NA	NA	NA	NA
chr1cre6987	NA	NA	NA	NA	NA	NA
chr1cre6996	0.107364819670199	51	0.453314085030783	0.92088242312396	0.381048387096774	0.772075426052363
chr1cre7029	-0.235950532864294	63	0.0626486528235084	0.755474869297024	0.022022022022022	0.265080785507487
chr1cre7049	-0.0902896904248313	60	0.492667681392958	0.926667527078453	0.464	0.818646637816245
chr1cre7054	0.0454925065270389	42	0.774820040136024	0.973123730551194	0.751020408163265	0.934031035014284
chr1cre7074	-0.184723691582957	52	0.189859246327448	0.83798754163633	0.193969849246231	0.619990653765345
chr1cre7082	-0.0851853615196487	56	0.532478246583528	0.933825152845192	0.558	0.863806623858487
chr1cre7085	-0.22484569521057	65	0.0717462929394908	0.765062927167839	0.065	0.415532924146635
chr1cre7103	-0.120142475562203	38	0.47246343141392	0.923009864578143	0.378787878787879	0.770890522591671
chr1cre7115	-0.145464564020212	69	0.233025849118544	0.86102533186605	0.354	0.754720292642456
chr1cre7118	-0.194386715817196	89	0.067945172931158	0.758563416127503	0.148	0.563363625141677
chr1cre7128	0.100113571870787	49	0.493705985073944	0.927455042974312	0.417417417417417	0.793605939190317
chr1cre7135	0.0264924805944049	85	0.809807485586367	0.978006043570085	0.79	0.945762748952661
chr1cre7138	-0.241362247931036	75	0.0369695508894273	0.742698467893471	0.053	0.383180770413544
chr1cre7145	-0.0218243873196165	77	0.850564469872356	0.983129299397297	0.833	0.958275732725583
chr1cre7151	-0.0554432760167494	50	0.702148627754968	0.962552803407408	0.663	0.90442953489775
chr1cre7153	-0.0983878401227004	68	0.424740257135816	0.91701623457784	0.345	0.748579534187515
chr1cre7161	0.0315723012676701	39	0.848681192679977	0.983095615761145	0.817171717171717	0.953654241281238
chr1cre7173	-0.00581434657538707	59	0.965139056911902	0.995702968267613	0.974	0.994248310231301
chr1cre7183	-0.158568293537303	64	0.210759487341049	0.850971585991502	0.101	0.492530003737888
chr1cre7185	0.0487348742300724	57	0.718845113549759	0.964746236135092	0.668	0.906235593731318
chr1cre7193	0.112573580647983	32	0.539591300581665	0.935444017563829	0.496913580246914	0.836003223342954
chr1cre7195	-0.0859602382591879	57	0.524915896610678	0.931530321393282	0.424	0.797060784748393
chr1cre7231	0.163305788996701	52	0.247364814652297	0.865845722841647	0.14543630892678	0.560460422633028
chr1cre7240	0.00944222937462431	45	0.950913782543832	0.994139653878292	0.942713567839196	0.987397703349282
chr1cre7248	-0.396131342793738	67	0.000905594166295037	0.718813047186448	0	0.0476979678985569
chr1cre7251	-0.309329602530822	40	0.052104648333445	0.750292020374991	0.0168776371308017	0.236227142463168
chr1cre7267	0.0200643088476282	91	0.85026964917517	0.983129299397297	0.817	0.95348664875261
chr1cre7268	-0.0517555487361335	83	0.642163298877776	0.953370246777767	0.647	0.898175089218479
chr1cre7276	-0.0104058328970515	73	0.930373208821553	0.992367427167827	0.890890890890891	0.97453295585357
chr1cre7288	-0.0464861802223266	44	0.764452199644314	0.971987322939362	0.739217652958877	0.930646573577393
chr1cre7294	-0.0180436056239342	80	0.87377931144668	0.986353639620148	0.874	0.96990001406778
chr1cre7300	0.00262167258738104	63	0.983730497808393	0.997693545253131	0.983983983983984	0.995771879997136
chr1cre7318	-0.302302091659732	57	0.0222818819968418	0.729726480868395	0.002002002002002	0.0755549873125392
chr1cre7321	0.0740668172458348	65	0.557629909857034	0.939722520589907	0.49	0.832447574162464
chr1cre7323	0.0519202693011751	82	0.64318312647393	0.953370246777767	0.609	0.883773142067502
chr1cre7328	-0.139278182728549	82	0.212050027164254	0.850971585991502	0.119	0.521849230769231
chr1cre7329	0.111631261130288	51	0.435458483219372	0.917367933278805	0.353707414829659	0.754720292642456
chr1cre7336	-0.0378400491544102	67	0.761117093926918	0.971987322939362	0.726	0.926098303198051
chr1cre7338	0.0400668337976507	79	0.725898709200984	0.966248038067717	0.688	0.913575271679559
chr1cre7348	0.201630911501133	77	0.078666932304942	0.769946194941427	0.116	0.517035452419122
chr1cre7366	-0.13302361520892	66	0.286974880038586	0.879397709437957	0.23	0.65724084479752
chr1cre7376	0.00504625914386928	67	0.967671922269493	0.996055922337161	0.961	0.991607516152976
chr1cre7390	0.17646128084819	79	0.119789500733497	0.789029528886147	0.049	0.371050548306955
chr1cre7408	0.0159284966757113	81	0.887761529779121	0.988658230531225	0.856	0.964842847506289
chr1cre7415	-0.230507723196564	59	0.0790170990552547	0.769946194941427	0.024	0.276167597408312
chr1cre7419	-0.0638836311932137	63	0.618896198601259	0.95088654182396	0.608	0.883452060897354
chr1cre7421	-0.0188011115545736	47	0.90017987676056	0.989804826144612	0.8687374749499	0.968425794327429
chr1cre7431	-0.218528788436492	59	0.0963522137063424	0.779251572096576	0.039	0.337473435105893
chr1cre7446	-0.0204604249725552	64	0.872507635190135	0.986153123597864	0.866	0.967511048604638
chr1cre7449	-0.113290660162952	30	0.551124497007783	0.938802616358823	0.461382113821138	0.817467362913362
chr1cre7452	-0.161245154965971	51	0.258312290566907	0.869770741015067	0.172344689378758	0.595245576632488
chr1cre7455	0.0234528931498231	76	0.840622971163624	0.982192684205186	0.861	0.96621481812317
chr1cre7461	0.00446470097736408	85	0.967652066417414	0.996055922337161	0.961	0.991607516152976
chr1cre7465	-0.239756831316339	57	0.0724432912771766	0.765735412030455	0.047	0.364622945425833
chr1cre7471	-0.00555509836462728	63	0.965534455368511	0.995724127576472	0.963927855711423	0.992369548261787
chr1cre7475	-0.0628970902033151	79	0.581855399128001	0.946642361429292	0.477	0.825839772153062
chr1cre7490	-0.0121057003471293	48	0.934914801025994	0.992631044901309	0.929	0.983928216710797
chr1cre7493	-0.0509354665044142	88	0.63743280427663	0.951598092055782	0.649	0.899019875933663
chr1cre7500	0.0786964063223254	47	0.599024279293989	0.949003440632612	0.512537612838516	0.843685732765049
chr1cre7504	-0.244630982486095	46	0.101315535658271	0.780492258060468	0.04004004004004	0.340896799029679
chr1cre7509	-0.0818030372651174	75	0.485360516681341	0.925029378317644	0.49	0.832447574162464
chr1cre7511	0.048834568239711	68	0.69249585615012	0.961935558488961	0.7	0.917584090768565
chr1cre7512	0.117020889989304	73	0.324151362929102	0.889221862539132	0.187	0.611970805595755
chr1cre7514	0.0931268322386156	82	0.40531660484877	0.914340218308282	0.372	0.766418513119533
chr1cre7518	0.0222069963059282	74	0.851031341206451	0.98330070146908	0.856	0.964842847506289
chr1cre7529	-0.0915596736762433	56	0.50213893159683	0.927455042974312	0.47	0.822023800930175
chr1cre7539	-0.121920179942888	63	0.341152601101146	0.897163782270324	0.196196196196196	0.622802108839393
chr1cre7544	0.0116977067723933	57	0.931178605052167	0.992367427167827	0.937	0.98581988436868
chr1cre7556	-0.228802157661215	53	0.0993676481943984	0.780362768272829	0.0433467741935484	0.352512886597938
chr1cre7581	0.162327137284786	58	0.223441052476578	0.856427507817601	0.185	0.609654720152335
chr1cre7588	-0.255245838917634	76	0.0260609019301111	0.729726480868395	0.019	0.248270097536197
chr1cre7592	-0.0783546793900206	49	0.592547904145714	0.948313809252221	0.537298387096774	0.854839740432737
chr1cre7603	0.118860872353959	49	0.415967757650686	0.915510797387374	0.35383064516129	0.754720292642456
chr1cre7611	0.0232573863015483	59	0.861201667759418	0.984467058471301	0.866	0.967511048604638
chr1cre7613	-0.0131083629369052	63	0.918784247714202	0.990975979256493	0.904	0.977991918070798
chr1cre7624	0.0852452134227093	56	0.532189239006071	0.933825152845192	0.530530530530531	0.851714207353115
chr1cre7628	-0.153873081604813	54	0.266609021144177	0.870792612303716	0.248746238716148	0.67464872636649
chr1cre7640	0.154973284514689	86	0.154227587857685	0.811179623881527	0.113	0.512615864015086
chr1cre7645	0.0247435829652697	49	0.865985817716494	0.985433538958438	0.86	0.965929874868793
chr1cre7647	-0.0480783273552463	68	0.697025423516671	0.962053931154953	0.612	0.884953998439758
chr1cre7662	0.0497466607361969	68	0.687047075462987	0.960960258015032	0.701701701701702	0.918275297710866
chr1cre7670	0.171523223973919	59	0.193958907915559	0.840961530805338	0.109109109109109	0.506507931243455
chr1cre7677	0.235421223812171	91	0.0246781622557013	0.729726480868395	0.003	0.0967357026216019
chr1cre7686	0.0934283671734103	53	0.505789735891117	0.927864859596085	0.475	0.824865356064097
chr1cre7687	-0.0254797723713153	60	0.846767091770139	0.982531219642758	0.818	0.95368246013824
chr1cre7689	0.061836000696689	62	0.633044815161208	0.951045362851692	0.54	0.855806308431956
chr1cre7696	0.0278886675511359	55	0.839825612092874	0.982192684205186	0.781	0.943479441712045
chr1cre7701	-0.199825728737502	66	0.107694087376171	0.784237914542741	0.055	0.388815006970327
chr1cre7702	-0.0277631243748017	86	0.79969176581206	0.976711979984279	0.794	0.946945277340234
chr1cre7706	-0.0382998419981577	77	0.740868022691168	0.968578214999024	0.709	0.920633081572732
chr1cre7722	-0.0208481455167427	75	0.859086613609702	0.984332764767006	0.852	0.963764161325392
chr1cre7723	0.0551653299962674	61	0.672832807314579	0.958808215962947	0.679	0.910542795695524
chr1cre7726	0.136308058770659	47	0.36093144394372	0.902447256283414	0.333333333333333	0.740851887282846
chr1cre7739	-0.108782230663045	70	0.370031734528945	0.903755119487032	0.267	0.689387728071978
chr1cre7741	-0.157729572731027	69	0.195532850205724	0.842354615042379	0.124	0.529569379918162
chr1cre7750	0.0576929744511353	56	0.67277009646283	0.958808215962947	0.672690763052209	0.908278369521698
chr1cre7756	0.037209237332639	93	0.723262112907749	0.965742969696851	0.719	0.923877998795368
chr1cre7780	0	81	1	1	0.995	0.99742297076051
chr1cre7795	0.0166652950938818	63	0.896853785035451	0.989273194718204	0.894	0.975414416674708
chr1cre7814	0.211619477845242	65	0.0905981848711249	0.776012231181963	0.053	0.383180770413544
chr1cre7822	0.2112033494969	63	0.0965915661878601	0.77968393373309	0.03	0.303258272783857
chr1cre7825	0.00808204509697772	70	0.947057162867793	0.99375255217882	0.941	0.986732086274001
chr1cre7846	-0.000755881219025387	82	0.994622526868899	1	0.99	0.996933230021108
chr1cre7857	-0.0851853615196487	56	0.532478246583528	0.933825152845192	0.643574297188755	0.897216046264237
chr1cre7874	-0.145274399543728	49	0.319267145983813	0.888754889083462	0.242728184553661	0.669488506960802
chr1cre7884	-0.0619697166019794	71	0.60767746373402	0.949207978124704	0.603	0.881469408687183
chr1cre7892	0.0204389463877367	78	0.859024535383692	0.984332764767006	0.868	0.96814791821488
chr1cre7893	0.17757244674623	75	0.127475256363492	0.796389559462074	0.071	0.430075038394228
chr1cre7905	0.168616050686225	59	0.201737772382075	0.845864621192062	0.143	0.556867836746522
chr1cre7918	-0.0467548046235865	77	0.686372935967715	0.960960258015032	0.668	0.906235593731318
chr1cre7920	0.0857118853895868	62	0.507726546650079	0.928688240495249	0.467	0.820287366916608
chr1cre7925	-0.090995041520371	80	0.42212365902715	0.916342356638566	0.377	0.76964697597997
chr1cre7928	-0.0177781289541638	70	0.883861554404139	0.987684811964625	0.86258776328987	0.966709793535263
chr1cre7931	-0.0353624122491669	35	0.840173214922838	0.982192684205186	0.803861788617886	0.949897451437289
chr1cre7937	-0.238538263488204	69	0.048399625402404	0.748137929864844	0.017	0.236227142463168
chr1cre7942	0.0743636599223753	71	0.537675763551976	0.935444017563829	0.5	0.837428280813328
chr1cre7951	0.0191741102164465	48	0.897078921243438	0.989273194718204	0.872	0.969243844414589
chr1cre7953	-0.0555463775218316	93	0.596920855233231	0.948809296771882	0.577	0.871269555967143
chr1cre7957	0.082365410229733	87	0.448192655513375	0.92088242312396	0.363	0.760796359457255
chr1cre7962	-0.0742097399745175	64	0.560040401103817	0.939722520589907	0.57	0.868326896130493
chr1cre7965	0.172355546894042	61	0.184093561617698	0.834783983025262	0.133	0.54325910672784
chr1cre7978	-0.0581138819948546	68	0.637831508579402	0.951598092055782	0.681	0.911131997775385
chr1cre7994	-0.151906583703223	61	0.242532269862175	0.862795841560311	0.179	0.602819225194099
chr1cre8003	0.0859266974435969	97	0.402672260528248	0.913259363111495	0.429	0.799700917751646
chr1cre8004	0.235707551309024	85	0.029883010780938	0.742074673354399	0.025	0.280458266104775
chr1cre8009	-0.164639688733389	38	0.32326728610482	0.889086479970941	0.277157360406091	0.697985247451329
chr1cre8016	-0.132303716895156	51	0.35471050156345	0.900068703974386	0.23023023023023	0.65759959037829
chr1cre8020	-0.282889474930502	55	0.0363729722837242	0.742698467893471	0.033	0.314952774244434
chr1cre8033	-0.268712495283572	52	0.0540793003557241	0.752521174222688	0.016	0.230210720124511
chr1cre8039	0.24446277220311	63	0.0534935151606558	0.752521174222688	0.018	0.242241232375959
chr1cre8043	-0.151925160296951	73	0.199454281381639	0.845794260125644	0.132	0.541830001452152
chr1cre8046	0.0556141270272758	83	0.617517618099618	0.95088654182396	0.625	0.889856742304044
chr1cre8047	-0.00584885338619664	57	0.965558110947167	0.995724127576472	0.954954954954955	0.990217920266065
chr1cre8051	-0.236480692669507	48	0.105609924353865	0.782823515976968	0.0450901803607214	0.357979622205206
chr1cre8056	-0.0357199813184547	56	0.793816156170623	0.975748376007797	0.723	0.925092874036688
chr1cre8057	0.0522497212932913	80	0.645304369958375	0.95368926285817	0.579	0.872081374386118
chr1cre8064	0.132782745984776	79	0.243387533105125	0.863159989714811	0.229	0.656385006041862
chr1cre8069	NA	NA	NA	NA	NA	NA
chr1cre8071	-0.072445284433206	59	0.585565101709731	0.947375471503966	0.520040080160321	0.846775771995416
chr1cre8074	-0.0193552415284691	51	0.892762186861392	0.988872943088085	0.868868868868869	0.968425794327429
chr1cre8076	-0.286187716526949	65	0.0208263279650512	0.729726480868395	0.019	0.248270097536197
chr1cre8081	0.0176918513767338	90	0.868545388207467	0.985834701006642	0.854	0.964296440793065
chr1cre8098	0.165314691960741	80	0.142797626179134	0.807252927183443	0.092	0.475166867148839
chr1cre8109	-0.0252591366356167	72	0.833188993717077	0.981512244326894	0.816	0.95326745603703
chr1cre8111	-0.152976172660024	51	0.283851121140203	0.878428076828887	0.192192192192192	0.617921707417641
chr1cre8116	0.0571582890632937	90	0.592574421877992	0.948313809252221	0.577	0.871269555967143
chr1cre8141	0.0812284878157336	48	0.583114313730638	0.946642361429292	0.56312625250501	0.865764180311854
chr1cre8149	-0.0779671313132166	62	0.546949123544561	0.937861083214204	0.457457457457457	0.815299560742906
chr1cre8164	-0.0811635686423928	58	0.544735156937611	0.937861083214204	0.539	0.855344458479532
chr1cre8170	0.112930376226538	87	0.297669012261897	0.880289144072071	0.307	0.721771411936761
chr1cre8189	0.0243995071253091	78	0.832073458949662	0.981512244326894	0.823	0.955207613924874
chr1cre8200	-0.161409337961723	48	0.273076547724653	0.874840440839408	0.207831325301205	0.6362063878519
chr1cre8202	-0.0704360725060499	49	0.630571733457146	0.95088654182396	0.569138276553106	0.868074578597102
chr1cre8206	-0.102005165963861	53	0.467348386141049	0.922698435889669	0.347432024169184	0.75054858336137
chr1cre8210	-0.0251216132989799	72	0.834084238172715	0.981512244326894	0.816	0.95326745603703
chr1cre8212	0.00968593987585777	56	0.94351733373681	0.993200697828367	0.930583501006036	0.984444700065776
chr1cre8224	-0.145274399543728	49	0.319267145983813	0.888754889083462	0.230460921843687	0.6580701030484
chr1cre8230	-0.114546622180756	60	0.383490470393317	0.908268411301612	0.341	0.745597390321081
chr1cre8237	-0.300792603759119	41	0.0560088083522862	0.753478616984927	0.0294117647058824	0.301852573651772
chr1cre8240	-0.095769409481113	75	0.41373521554903	0.914523398872104	0.426	0.798148803605753
chr1cre8243	-0.00551653299962674	61	0.9663436820713	0.995828955248902	0.969909729187563	0.99347480426466
chr1cre8244	0.0529857210106274	67	0.670221331972517	0.958318175518916	0.616	0.886539233739234
chr1cre8248	-0.0308643227911519	65	0.807179690504483	0.977261469106486	0.770770770770771	0.940388064853669
chr1cre8276	-0.0387104830569382	51	0.787394343446903	0.974886956030377	0.757788944723618	0.936503329108207
chr1cre8282	-0.14593894080125	57	0.278712236836488	0.876004239472367	0.16566265060241	0.586946431363556
chr1cre8289	-0.245571879722468	40	0.126666728870976	0.794975084723921	0.0536980749746707	0.385988868747489
chr1cre8304	0.00445580240305331	78	0.969115691150581	0.996443888487295	0.969	0.993293376366702
chr1cre8319	0.155589324264421	46	0.301827867745495	0.882695273238653	0.223115577889447	0.651094318085087
chr1cre8335	-0.237363463632932	79	0.035177583404165	0.742698467893471	0.012	0.202292736896648
chr1cre8343	-0.0259413253548045	72	0.828751255629783	0.980757101922383	0.827	0.956410746492559
chr1cre8357	-0.190692517849118	49	0.189361815873508	0.836736294849748	0.149149149149149	0.565270275862455
chr1cre8369	0	88	1	1	0.997	0.997867833948546
chr1cre8377	-0.282187852415792	56	0.0351086364669013	0.742698467893471	0.00200400801603206	0.0755549873125392
chr1cre8380	-0.0153085298648764	65	0.903664428099338	0.990356564595878	0.913	0.980315361970181
chr1cre8402	0.0318164248378253	70	0.793731268716562	0.975748376007797	0.794	0.946945277340234
chr1cre8404	0.239023296263202	40	0.1374361713284	0.803325210444088	0.0955734406438632	0.483294131615661
chr1cre8410	0.106621684647595	50	0.46114378056453	0.921653137387473	0.382914572864322	0.773230759158408
chr1cre8413	-0.063914072732878	92	0.544993181576775	0.937861083214204	0.579	0.872081374386118
chr1cre8419	-0.0585057338428887	33	0.746386306787435	0.968979648773334	0.704239917269907	0.919008003700149
chr1cre8435	0.0895355185411849	53	0.52375500151502	0.931384022158497	0.432	0.801514382763657
chr1cre8462	-0.116390712814883	65	0.35584688062936	0.900234609888052	0.326	0.735385063510009
chr1cre8463	0.0823190967622718	63	0.521267066111602	0.929885652253113	0.454	0.813202099571214
chr1cre8474	0.184933740100122	84	0.0921605997388369	0.777939178483228	0.049	0.371050548306955
chr1cre8483	-0.0805488987502182	90	0.450429160072897	0.92088242312396	0.425	0.79759246452184
chr1cre8484	0.0499268607938749	50	0.730604309771187	0.967144816559802	0.639558232931727	0.895523727806745
chr1cre8497	0.0996023841111995	55	0.469368649215037	0.922698435889669	0.463	0.81813341182109
chr1cre8507	0.11430345219515	70	0.346087831906698	0.897774881131729	0.321	0.731721662578542
chr1cre8520	0.220683707376187	43	0.155003345658059	0.811179623881527	0.127254509018036	0.535001412557149
chr1cre8531	-0.0716114874039433	64	0.57389569031778	0.943609372090783	0.49	0.832447574162464
chr1cre8534	0.186561504081616	76	0.106602842998487	0.783295866111183	0.06	0.402713933986172
chr1cre8535	0.112704409447603	72	0.345885933389001	0.897774881131729	0.359	0.758071154660226
chr1cre8539	0.0413449115297361	51	0.77329697062763	0.973123730551194	0.72351160443996	0.925394990598423
chr1cre8545	0.0276259748989305	78	0.810258446842006	0.978006043570085	0.782	0.94368594553249
chr1cre8546	-0.129766296396977	83	0.24230310564395	0.862795841560311	0.162	0.582080462692259
chr1cre8547	0.0937742134502565	75	0.423575266757419	0.916802852439053	0.445	0.808714714239027
chr1cre8548	-0.0268659846972263	92	0.799331742178488	0.976625137189342	0.771	0.940388064853669
chr1cre8554	0.0487177351846223	80	0.667820131395654	0.957993319944347	0.657	0.902103764572539
chr1cre8555	-0.0116286931507741	59	0.930342866052644	0.992367427167827	0.929	0.983928216710797
chr1cre8557	0.127409459970035	60	0.331991741095228	0.893275386635988	0.188188188188188	0.613356103982876
chr1cre8565	0.0433308569347956	82	0.699100131218068	0.962552803407408	0.655	0.901386337449895
chr1cre8569	0.103967731690821	57	0.441514465799132	0.919869139707958	0.334	0.740928356413039
chr1cre8575	0.189650111108945	55	0.165502776009441	0.817738835535516	0.0812437311935807	0.453540635731625
chr1cre8577	-0.0157450055906982	82	0.888346379924648	0.988691010091683	0.869	0.968425794327429
chr1cre8586	-0.0357599269926076	50	0.805261070871023	0.977198617234624	0.783567134268537	0.944044018928139
chr1cre8587	0.101667152786337	52	0.473267961568206	0.923032244500164	0.424849699398798	0.79759246452184
chr1cre8601	0.240086721266692	45	0.112159165176154	0.786759670424498	0.047047047047047	0.364622945425833
chr1cre8602	-0.0384466792531482	62	0.766712118865805	0.972443499654808	0.727	0.926450647501475
chr1cre8605	-0.129155653940093	66	0.301344610633696	0.882398809342923	0.233	0.660234791906839
chr1cre8608	0.0154841932227753	51	0.914119226921041	0.99048348457516	0.896586345381526	0.976047277941559
chr1cre8611	0.0574064743343753	73	0.629512105065678	0.95088654182396	0.641	0.89602110772274
chr1cre8617	0.0116785458966763	53	0.933854298777652	0.992367427167827	0.936810431293882	0.98581988436868
chr1cre8650	-0.012787765607847	64	0.920114178953355	0.991110047525296	0.901	0.977199192970788
chr1cre8653	-0.134907417126342	65	0.283961902198408	0.878428076828887	0.286	0.705442518806749
chr1cre8657	0.0993785236239951	72	0.406224872454311	0.914428266272763	0.342	0.746303921348876
chr1cre8658	-0.121436031370828	48	0.410959974302631	0.914523398872104	0.308467741935484	0.723325061247024
chr1cre8687	-0.120627386090822	57	0.371423511129238	0.904498447090733	0.255	0.679395117583298
chr1cre8689	-0.0282662426668625	80	0.803444595927778	0.976945878841362	0.808	0.951032544840676
chr1cre8690	0.0469135412449418	50	0.746303995425784	0.968979648773334	0.7374749498998	0.930187300041989
chr1cre8715	0.0799407320986346	82	0.475273744791272	0.924044623224138	0.363	0.760796359457255
chr1cre8716	0.0566346548469735	81	0.61553183094159	0.950871470834583	0.661	0.903725632612919
chr1cre8725	-0.235481036303176	59	0.0725893052993446	0.765735412030455	0.039	0.337473435105893
chr1cre8726	-0.29307410520706	59	0.0242784324475065	0.729726480868395	0.011	0.194228614455715
chr1cre8751	-0.170595170561004	82	0.125437163602082	0.794975084723921	0.093	0.477265019592417
chr1cre8756	-0.140766387261399	78	0.218968788595857	0.851184974060369	0.284	0.703774577918046
chr1cre8767	-0.0183778315528085	61	0.88820345775124	0.988691010091683	0.876	0.970500181270066
chr1cre8769	0.0610075825917553	86	0.576842732059909	0.944851770370916	0.439	0.805426556254496
chr1cre8782	-0.0109886915363738	51	0.938996072368238	0.992631044901309	0.922768304914744	0.982401334203557
chr1cre8783	0.00756145018324145	54	0.956723501605657	0.994432841721336	0.955911823647295	0.990440375434856
chr1cre8788	-0.0157242725508288	79	0.890603032751092	0.988691010091683	0.883	0.972319897935996
chr1cre8794	-0.241891438971652	86	0.0248441522598016	0.729726480868395	0.004	0.114389060801204
chr1cre8800	0.1755586146803	78	0.124189000397259	0.7946924033036	0.069	0.425466969641883
chr1cre8805	-0.0515777189029079	90	0.62924416772882	0.95088654182396	0.577	0.871269555967143
chr1cre8818	-0.0182909828475566	62	0.887787720547158	0.988658230531225	0.85871743486974	0.96562203560587
chr1cre8827	-0.251759974136308	66	0.0414298408736282	0.744093479806719	0.031	0.307477592708398
chr1cre8832	-0.204861905349265	69	0.091299373173017	0.776095939096053	0.1001001001001	0.490925291749895
chr1cre8843	0.0217948983306689	97	0.832187157778605	0.981512244326894	0.844	0.961577047352263
chr1cre8849	-0.0807060620298685	78	0.48241987182791	0.924850498140027	0.434	0.802599854978438
chr1cre8858	-0.141277643800936	71	0.239913957870478	0.862118496445549	0.171	0.593295576126426
chr1cre8861	-0.211619477845242	65	0.0905981848711246	0.776012231181963	0.05	0.374191089064397
chr1cre8865	-0.170038244046118	70	0.159339048648816	0.814774348212282	0.199	0.625868764603345
chr1cre8875	-0.174365854649683	45	0.251973685645342	0.868749416893769	0.165330661322645	0.586407459501474
chr1cre8881	-0.140372199028732	52	0.320925770346759	0.888953028913872	0.301	0.717118890254609
chr1cre8891	-0.0016607805575296	100	0.986916067019067	0.998014746781281	0.993	0.997227608626141
chr1cre8898	0.249746397572689	76	0.0295732706177464	0.739661734096907	0.011	0.194228614455715
chr1cre8904	-0.288331538564143	65	0.0198483623989846	0.729726480868395	0.018	0.242241232375959
chr1cre8915	0.0757166146430606	43	0.629400965131298	0.95088654182396	0.577889447236181	0.87171318560148
chr1cre8921	-0.123612846514549	37	0.466061075287884	0.922698435889669	0.392315470171891	0.778840187480222
chr1cre8926	0.0186036450436994	68	0.880308308944054	0.987277791478222	0.862	0.966416211374536
chr1cre8929	-0.145857075023899	82	0.191036134618713	0.838161300292811	0.16	0.579683841749979
chr1cre8943	-0.13391214215508	83	0.227455104921118	0.857712418981507	0.186	0.610719234901798
chr1cre8945	0.0599042297873154	65	0.635486811636642	0.951598092055782	0.609	0.883773142067502
chr1cre8951	0.0506070322189306	53	0.718944119098763	0.964746236135092	0.680080482897384	0.910863793307611
chr1cre8975	0.0179567642777087	75	0.878468857178275	0.986812136642905	0.88	0.971596489857563
chr1cre8984	-0.126320341036463	74	0.283517160086571	0.878428076828887	0.161	0.58089948091733
chr1cre8998	-0.0943802131457176	63	0.461874744980734	0.921653137387473	0.419	0.794206512324465
chr1cre9006	-0.0903819120478766	80	0.425270373690808	0.91701623457784	0.473	0.823724289828881
chr1cre9007	0.0770378350187767	76	0.508321387639891	0.928688240495249	0.421	0.795313142901697
chr1cre9010	0.168947563997584	57	0.208999551045565	0.850971585991502	0.139278557114228	0.552285019408718
chr1cre9013	0.0341189390872304	50	0.814035134235854	0.979050958530361	0.774619289340101	0.941586553959669
chr1cre9019	-0.298729414608449	53	0.0297949287924797	0.741501648248686	0.00611620795107034	0.143951566015748
chr1cre9020	-0.155548014911345	102	0.11849668869408	0.789029528886147	0.049	0.371050548306955
chr1cre9058	0.0765038744728955	53	0.586114744484579	0.947375471503966	0.493987975951904	0.834287390029326
chr1cre9065	-0.0967762076423455	51	0.49931047756907	0.927455042974312	0.45045045045045	0.811552611894771
chr1cre9081	0.291779257547782	41	0.0641654469394162	0.755474869297024	0.0200400801603206	0.254638625854361
chr1cre9096	-0.195559418495802	70	0.104714670014751	0.782823515976968	0.107	0.503057797859955
chr1cre9099	-0.144337567297406	55	0.29309006682481	0.880158966929115	0.227	0.654729890139791
chr1cre9103	0.0964479431132523	43	0.538388323282991	0.935444017563829	0.440763052208835	0.806517797642796
chr1cre9110	0.0280677497434364	42	0.859944379853901	0.984332764767006	0.833500501504513	0.958585166879426
chr1cre9115	-0.078067086829745	61	0.549824329565604	0.938601658517586	0.478478478478478	0.826921943150877
chr1cre9116	-0.234794751066916	64	0.0618266526228443	0.755474869297024	0.061	0.405236329440512
chr1cre9135	0.0644457174588439	70	0.596087976501555	0.948462634122207	0.527	0.849952471745033
chr1cre9144	0.0917895295028981	78	0.424137202036564	0.916802852439053	0.453	0.812676877674175
chr1cre9175	0.0628094179663421	67	0.613600194768806	0.950871470834583	0.546	0.858516321630216
chr1cre9176	-0.12121040261346	72	0.310463657903841	0.885172664138684	0.201	0.628493487338797
chr1cre9200	-0.0900219129590433	80	0.427124209252332	0.917242304003024	0.408	0.78780905106165
chr1cre9215	0.139912195455874	78	0.221805644573778	0.853979843858041	0.288	0.70709025897885
chr1cre9226	-0.146756149196008	75	0.208965831009951	0.850971585991502	0.204	0.63167837874846
chr1cre9227	-0.24989724879713	56	0.0632439797983973	0.755474869297024	0.034	0.318879993713571
chr1cre9228	0.103975622116378	84	0.346588152773532	0.89792211462325	0.252	0.677194848363341
chr1cre9229	0.00491028616140236	80	0.965519812905045	0.995724127576472	0.962	0.991912175163311
chr1cre9235	NA	NA	NA	NA	NA	NA
chr1cre9242	-0.30372272353133	77	0.007246118780789	0.722088729034198	0.004	0.114389060801204
chr1cre9244	-0.0816105062633721	82	0.466071165877529	0.922698435889669	0.435	0.803209892000174
chr1cre9245	-0.0277797463669711	84	0.801938584774566	0.976939881207257	0.76	0.937117473427072
chr1cre9258	-0.00343660874517634	55	0.980133742803112	0.997145087519942	0.974	0.994248310231301
chr1cre9268	0.00529048694613106	65	0.966637460866382	0.995828955248902	0.96	0.991371823130412
chr1cre9273	-0.0781966239492789	38	0.640750620333098	0.952616965335466	0.612449799196787	0.885233924253261
chr1cre9285	-0.110520306333242	57	0.413108507800522	0.914523398872104	0.297786720321932	0.714690112065613
chr1cre9295	0.186537591931941	62	0.146589757299451	0.807252927183443	0.167	0.588290096135913
chr1cre9296	0.212128253195988	56	0.116522100404903	0.789029528886147	0.074	0.437169270425135
chr1cre9306	0.0526861900876475	62	0.684234583073387	0.960228032444965	0.609	0.883773142067502
chr1cre9310	0.0327326835353989	29	0.866141099903651	0.985433538958438	0.849367088607595	0.963168830821755
chr1cre9311	-0.0660104252295272	87	0.543544358032244	0.937718067120593	0.512	0.843305354974361
chr1cre9323	-0.144720133659421	88	0.178535496742219	0.831022723966561	0.076	0.441729814941741
chr1cre9326	-0.160908165287357	75	0.167862261541284	0.820271397024378	0.083	0.45695263909628
chr1cre9334	-0.178279425411702	90	0.09273143821509	0.778253489610177	0.051	0.377145129448298
chr1cre9358	0.0638405660119122	64	0.616251279106506	0.95088654182396	0.52	0.846771481927769
chr1cre9370	0.232128890425847	65	0.0627902254093664	0.755474869297024	0.017017017017017	0.236227142463168
chr1cre9380	-0.0477537149808041	54	0.731672649967929	0.967374502498128	0.72	0.924147712007749
chr1cre9384	-0.158853443404827	66	0.202670191935488	0.846903987205195	0.166	0.586946431363556
chr1cre9393	-0.110085842486251	66	0.378895957346065	0.906693865927239	0.315947843530592	0.728346438715464
chr1cre9394	0.0102477449969745	54	0.941372378937181	0.992920361834606	0.932	0.984697862320082
chr1cre9395	-0.13506529734439	42	0.393756466464188	0.911426769026831	0.31850353892821	0.730421949359057
chr1cre9403	-0.198259861770142	71	0.0974362247623495	0.780345632291252	0.05	0.374191089064397
chr1cre9413	-0.0934484557419663	52	0.509940988160825	0.928688240495249	0.409638554216867	0.78903878449528
chr1cre9431	0.00834919641460112	57	0.950849859388342	0.994139653878292	0.937	0.98581988436868
chr1cre9433	0.0333711906235957	49	0.819932911814561	0.980100412970776	0.804020100502513	0.94991458222829
chr1cre9444	-0.14562464822558	71	0.225609332994442	0.856921223069666	0.132	0.541830001452152
chr1cre9446	0.0632455532033676	49	0.665943012500699	0.957561510549199	0.6	0.880228705874212
chr1cre9449	0.0991299308850708	71	0.410800370217795	0.914428266272763	0.428	0.799273588125833
chr1cre9459	0.000921933126272247	82	0.993441227887916	1	0.991	0.997010834714985
chr1cre9461	-0.142475385528103	72	0.232522021818333	0.86102533186605	0.118	0.520248466257669
chr1cre9462	0.106860530282845	39	0.517315189801829	0.928688240495249	0.472672064777328	0.823724289828881
chr1cre9467	-0.300416377715996	49	0.0359631758996378	0.742698467893471	0	0.0476979678985569
chr1cre9478	-0.393556577745538	43	0.00902826175646851	0.722088729034198	0.00402414486921529	0.114389060801204
chr1cre9484	-0.0858742005654648	50	0.553207296334925	0.939453108943178	0.510510510510511	0.842894755964102
chr1cre9495	-0.270495803534911	66	0.0280448767701369	0.736840994681093	0.017017017017017	0.236227142463168
chr1cre9496	0.0996023841111995	55	0.469368649215037	0.922698435889669	0.404	0.785527379867357
chr1cre9505	0.140372481268719	57	0.297654065434578	0.880289144072071	0.206	0.634143262939132
chr1cre9510	0.0703050707936371	48	0.634903427649856	0.951510845857946	0.589	0.875891512018904
chr1cre9511	-0.0560405219746475	72	0.640095672199147	0.952594032437741	0.61	0.884127401925386
chr1cre9521	-0.259125813353643	64	0.0386767545354514	0.742698467893471	0.032	0.311042309402171
chr1cre9525	0.0295973125358284	60	0.822378986136189	0.980100412970776	0.798597194388778	0.948499667527595
chr1cre9529	-0.0524118568378755	88	0.627697367162128	0.95088654182396	0.633	0.893030378399062
chr1cre9531	-0.202135771517965	40	0.210992827905674	0.850971585991502	0.124744376278119	0.531051952606398
chr1cre9541	0.336971559670658	46	0.0220223010803668	0.729726480868395	0.00506585612968592	0.12954979877124
chr1cre9542	0.102950033087574	70	0.396388205039654	0.911954397577182	0.377	0.76964697597997
chr1cre9545	-0.0956182887467515	55	0.48741253719853	0.925029378317644	0.491967871485944	0.833357721750333
chr1cre9568	-0.160456880985503	46	0.286766102336363	0.879397709437957	0.176884422110553	0.600195477447217
chr1cre9577	0.103030988616943	51	0.471854181537344	0.922698435889669	0.339339339339339	0.744651997946515
chr1cre9598	0.263198402378849	57	0.0479163232396729	0.748137929864844	0.016	0.230210720124511
chr1cre9608	-0.145418060484287	58	0.276081252947497	0.875718441475358	0.247	0.673090130548303
chr1cre9613	0.315301767642306	37	0.0573170806632114	0.753478616984927	0.0163432073544433	0.233073307590577
chr1cre9623	-0.0707910159723847	59	0.594178233477745	0.948462634122207	0.475951903807615	0.825397602433351
chr1cre9630	-0.228593979533775	66	0.0648703488685099	0.755474869297024	0.04	0.340896799029679
chr1cre9631	-0.0546456246234968	53	0.697549501655137	0.962053931154953	0.669	0.906634723026828
chr1cre9632	-0.105873274846854	69	0.386588915678295	0.908268411301612	0.343	0.747016244189332
chr1cre9648	0.0268727435129096	58	0.841294681003569	0.982192684205186	0.805805805805806	0.950522244009624
chr1cre9657	0.0272955039162233	42	0.863761060093913	0.984887921787682	0.839357429718876	0.96039072269542
chr1cre9662	0.1684509149717	60	0.198239530950079	0.844455228948085	0.116465863453815	0.518342239916828
chr1cre9667	-0.172001673338044	44	0.264238184794744	0.870538929276585	0.206931702344546	0.635203991351469
chr1cre9669	0.112233222906858	58	0.401586712010597	0.913065822658272	0.298492462311558	0.715414119041237
chr1cre9677	-0.143848215274987	58	0.281354259873409	0.877488414738283	0.265531062124248	0.688735025380711
chr1cre9680	-0.0801751998941236	53	0.56821241044194	0.943003374993856	0.568686868686869	0.867957340984314
chr1cre9682	0.145274399543728	49	0.319267145983813	0.888754889083462	0.208625877632899	0.637150773821293
chr1cre9685	-0.145274399543728	49	0.319267145983813	0.888754889083462	0.265265265265265	0.688298490801436
chr1cre9691	-0.0428085771650762	59	0.747504891981261	0.969311343307646	0.71	0.920965579481532
chr1cre9698	-0.257159690718943	52	0.065707658708988	0.755474869297024	0.0232323232323232	0.271945976432138
chr1cre9701	0	67	1	1	0.992992992992993	0.997227608626141
chr1cre9702	-0.0104925437622382	60	0.93658136424773	0.992631044901309	0.93	0.984203406329071
chr1cre9710	-0.128801879490738	79	0.257933720330949	0.869770741015067	0.229	0.656385006041862
chr1cre9711	-0.103026502254027	76	0.375812297815364	0.905763231042789	0.342	0.746303921348876
chr1cre9719	-0.157279894336489	46	0.296540144352845	0.880289144072071	0.164812942366026	0.585663325101503
chr1cre9720	-0.0174720670213003	65	0.890128520345306	0.988691010091683	0.872	0.969243844414589
chr1cre9723	-0.0784936787677254	59	0.554564558319994	0.939722520589907	0.504	0.839344091452342
chr1cre9730	-0.247969528476377	77	0.0296738618720063	0.740384179890655	0.02	0.254638625854361
chr1cre9738	0.0858630232688311	89	0.423677104803381	0.916802852439053	0.441	0.806517797642796
chr1cre9741	-0.0670669371077074	62	0.604512502944524	0.949003440632612	0.581	0.872892193078034
chr1cre9747	-0.21501661360094	62	0.0932924499296106	0.778702771145251	0.072	0.432655612244898
chr1cre9749	0.0454256762579498	79	0.690982522146847	0.961339875713325	0.629	0.891465725722212
chr1cre9759	-0.10309826235529	49	0.480848084562613	0.924850498140027	0.513513513513513	0.844150785230592
chr1cre9769	-0.192654875781712	93	0.0642931593079268	0.755474869297024	0.064	0.413086369950336
chr1cre9779	-0.172219423003126	73	0.145128213389157	0.807252927183443	0.07	0.4278840193181
chr1cre9788	-0.0646058282469799	24	0.764238248376343	0.971987322939362	0.752631578947368	0.934775915766668
chr1cre9790	-0.0832466631764116	73	0.483802173020383	0.925029378317644	0.408	0.78780905106165
chr1cre9815	-0.143804677708857	44	0.351706567391225	0.898756361802477	0.314	0.727016887141473
chr1cre9827	-0.0110701860692512	33	0.951245257066226	0.994139653878292	0.937888198757764	0.986122616217624
chr1cre9838	-0.371043462573631	50	0.00798403490130035	0.722088729034198	0.00100300902708124	0.0476979678985569
chr1cre9842	0.196160540467665	47	0.186342269974226	0.835698334092435	0.0882647943831495	0.467492072269461
chr1cre9858	-0.00868196875142256	82	0.938294946619006	0.992631044901309	0.935	0.985378332194122
chr1cre9860	-0.163795668609545	70	0.175446756332688	0.827502585618048	0.125	0.531051952606398
chr1cre9861	0.274406242970416	69	0.0225048078327281	0.729726480868395	0.003	0.0967357026216019
chr1cre9866	-0.368175869550578	40	0.0194139661661563	0.729726480868395	0.0121212121212121	0.202848655283408
chr1cre9872	-0.37298898599063	52	0.00646296490009744	0.722088729034198	0.001001001001001	0.0476979678985569
chr1cre9896	-0.311226093891228	88	0.00316246427753343	0.718813047186448	0.001	0.0476979678985569
chr1cre9905	-0.0484161293824354	84	0.661858382207537	0.956884456729695	0.668	0.906235593731318
chr1cre9913	0.0954139780497359	59	0.472233223212616	0.923009864578143	0.389	0.7764517419409
chr1cre9918	-0.17870365474917	55	0.191757440838595	0.838161300292811	0.248	0.673860873465987
chr1cre9919	-0.17628720030257	68	0.150422859109325	0.810071491449508	0.181	0.605162607315703
chr1cre9921	-0.0755378349969945	45	0.621892807631022	0.95088654182396	0.562374245472837	0.865644623341538
chr1cre9941	0.0572737243690821	47	0.70217216257773	0.962552803407408	0.661646586345382	0.904090718395317
chr1cre9947	-0.0500079738458365	56	0.714354527716461	0.964387229698157	0.66966966966967	0.906970796658473
chr1cre9950	-0.121852829201192	77	0.29110294730988	0.880158966929115	0.294	0.711485663325366
chr1cre9961	-0.0736082312949109	60	0.576208132810013	0.944365548781616	0.52	0.846771481927769
chr1cre9962	-0.154996065560921	92	0.140138719650278	0.806182303227258	0.178	0.601469915524386
chr1cre9967	-0.130410132739325	71	0.278370222047648	0.876004239472367	0.18	0.604004115307758
chr1cre9968	-0.0156634619179492	62	0.903824408000601	0.990356564595878	0.89	0.974270177513599
chr1cre9973	-0.118027867182804	45	0.440008004648019	0.919022022438055	0.352818371607516	0.754019559193955
chr1cre9980	0.130229531271338	82	0.243554464558202	0.863246935946401	0.186	0.610719234901798
chr1cre9985	0.051366950680084	71	0.670527605577028	0.958426177551637	0.584	0.873954258285392
chr1cre9991	0.10207957747376	54	0.462645032885717	0.921708471401675	0.383383383383383	0.77371464683308
chr1cre10011	0.050003543460548	84	0.651480910514422	0.954365625755465	0.589	0.875891512018904
chr1cre10012	-0.081749821276734	53	0.560612725771248	0.939722520589907	0.538	0.854853360565122
chr1cre10014	-0.232171867671199	56	0.0850978340317476	0.77446825804086	0.053	0.383180770413544
chr1cre10027	-0.0270551655323338	73	0.820259490141245	0.980100412970776	0.801	0.949075663880944
chr1cre10035	-0.150832323080544	73	0.202744724169987	0.846903987205195	0.211	0.639243517947893
chr1cre10036	-0.104198416281747	72	0.383725034796646	0.908268411301612	0.28	0.700360295256285
chr1cre10052	-0.0238071912575898	65	0.850686873948587	0.983129299397297	0.814	0.952814606741573
chr1cre10053	-0.135208240434037	43	0.38732804943071	0.908614790599679	0.250755287009063	0.676291840090233
chr1cre10071	-0.0785041566945782	56	0.565216901456735	0.941589055333259	0.478	0.826394271151886
chr1cre10077	-0.0528680532637681	47	0.724139188854675	0.965742969696851	0.713713713713714	0.922102524271845
chr1cre10081	-0.0831937913621379	73	0.484080872292391	0.925029378317644	0.479	0.826921943150877
chr1cre10087	0	63	1	1	0.993	0.997227608626141
chr1cre10096	-0.148935762175467	94	0.151952395770152	0.811179623881527	0.327	0.736152581069063
chr1cre10109	0.0385448763639034	80	0.734266167746993	0.967542588062556	0.624	0.889597982599924
chr1cre10126	0.0478713553878169	89	0.655966620457484	0.955735964622908	0.547	0.858981750337957
chr1cre10129	0.0561794616691172	81	0.618378191846204	0.95088654182396	0.576	0.870900148433425
chr1cre10131	0.00454719295770879	48	0.975529862948948	0.996632929694835	0.972945891783567	0.994068141910106
chr1cre10150	-0.189445690246666	100	0.0590565812287487	0.753478616984927	0.039	0.337473435105893
chr1cre10155	-0.0691062620344002	64	0.587403003941858	0.947453382262888	0.514	0.844150785230592
chr1cre10156	-0.0408684879915515	50	0.778102741461723	0.973123730551194	0.756	0.935937070862447
chr1cre10157	-0.172682905150372	75	0.138469574598478	0.804179137744586	0.052	0.380037455824709
chr1cre10172	-0.260417162241381	75	0.0240402160144916	0.729726480868395	0.018	0.242241232375959
chr1cre10174	0.0226430525720584	83	0.838989999196342	0.981993688795911	0.834	0.958585166879426
chr1cre10175	-0.0224808697623347	94	0.829711972133396	0.980970188108713	0.842	0.961002711996716
chr1cre10181	-0.107051865315706	63	0.403669170955077	0.913365382587619	0.432	0.801514382763657
chr1cre10184	-0.23824956157248	77	0.0369256511904517	0.742698467893471	0.036	0.326604379188144
chr1cre10185	-0.165186168136479	71	0.168618818540496	0.821241072876052	0.116	0.517035452419122
chr1cre10189	0.021143649512374	88	0.844977379206388	0.982531219642758	0.861	0.96621481812317
chr1cre10201	-0.104786098081947	68	0.395095596431956	0.911846979295751	0.344	0.747873634015498
chr1cre10208	-0.123218611606909	63	0.335996631805014	0.894716132037755	0.25	0.675415959793872
chr1cre10220	0.130509224415969	73	0.271096737438132	0.872976881797906	0.156	0.57430091492202
chr1cre10223	-0.104809887169709	81	0.351752357181451	0.898812293247638	0.297	0.713866584468868
chr1cre10240	-0.126907502993372	47	0.395296941262232	0.911846979295751	0.37374749498998	0.7676389490627
chr1cre10241	-0.134440660888355	61	0.301607980516811	0.88269039503248	0.22	0.648158564442862
chr1cre10253	-0.244630982486095	46	0.101315535658271	0.780492258060468	0.0791583166332665	0.448745037497072
chr1cre10262	0.106210494812235	90	0.319085878005413	0.888723761790801	0.354	0.754720292642456
chr1cre10324	-0.0420306941961893	82	0.707714853756346	0.963292093676093	0.672	0.907936221654843
chr1cre10326	-0.1318866612506	79	0.246611488507197	0.865161065758068	0.153	0.570344264456997
chr1cre10328	0.207653373569288	53	0.13569695079559	0.801798384903441	0.0970970970970971	0.485488348017829
chr1cre10330	0.0531624572866054	72	0.657391542809129	0.955735964622908	0.63	0.891798685446009
chr1cre10340	-0.10862609696793	54	0.434287772627861	0.917367933278805	0.35448136958711	0.755304651629576
chr1cre10356	0.165379646118945	51	0.246140604902898	0.865161065758068	0.151	0.567642322014363
chr1cre10362	0.145284704987136	68	0.23715765661329	0.86102533186605	0.102	0.494265771428571
chr1cre10364	-0.151622876485401	75	0.194094893760058	0.841062340925938	0.178	0.601469915524386
chr1cre10369	-0.0276983999365019	82	0.804895459702471	0.977198617234624	0.848	0.96250379288537
chr1cre10394	-0.149303637614594	48	0.311141165975378	0.885429639210258	0.194164989939638	0.620301520444657
chr1cre10412	0.0140135211628611	91	0.895111682053512	0.989273194718204	0.893	0.975160841277046
chr1cre10414	0.14884168150705	51	0.297221177776623	0.880289144072071	0.217	0.645334332807294
chr1cre10427	-0.00474224885521934	58	0.971816702250119	0.996632929694835	0.970970970970971	0.993643933725926
chr1cre10446	-0.158513012904885	58	0.234655611479993	0.86102533186605	0.133	0.54325910672784
chr1cre10447	-0.0155053429757409	88	0.885988590769379	0.98808946439769	0.903	0.977708353150347
chr1cre10455	0.0082487027357325	70	0.945967059903615	0.993641575457194	0.948	0.988644352004722
chr1cre10457	0.137317603522323	77	0.23369305439899	0.86102533186605	0.186	0.610719234901798
chr1cre10465	0.0546456246234968	53	0.697549501655137	0.962053931154953	0.647	0.898175089218479
chr1cre10483	0.0551955752864504	84	0.618007475261528	0.95088654182396	0.506	0.840529323871415
chr1cre10493	-0.0181887718308352	48	0.902341619232259	0.989937830252645	0.893617021276596	0.975414416674708
chr1cre10497	-0.0428639775821456	56	0.753768503032586	0.970318477468278	0.691	0.914590782629733
chr1cre10505	-0.148183635799006	80	0.189590899091589	0.837259318503323	0.102	0.494265771428571
chr1cre10511	-0.401236196284975	65	0.000924758609399824	0.718813047186448	0	0.0476979678985569
chr1cre10522	-0.295596300875804	71	0.0123240177142216	0.722088729034198	0.014	0.217374833518445
chr1cre10524	-0.151151126652132	91	0.1526628707131	0.811179623881527	0.12	0.523533936127796
chr1cre10542	0.0485071250072666	35	0.782000631343701	0.973948973371666	0.775862068965517	0.941995111459441
chr1cre10550	-0.0916096377007999	48	0.535742268020784	0.934869318106425	0.483450351053159	0.829441113912283
chr1cre10558	-0.272179412617966	49	0.0584959944347039	0.753478616984927	0.0212335692618807	0.261025229615064
chr1cre10567	0.0112358923338234	81	0.920698085668148	0.991110047525296	0.889	0.974005121050318
chr1cre10574	0.044485653952087	76	0.702773993973426	0.962552803407408	0.723	0.925092874036688
chr1cre10580	-0.145488391018604	65	0.247529551454298	0.865845722841647	0.182	0.60621231710603
chr1cre10586	-0.169533172561123	71	0.157535161686707	0.812631141504825	0.103	0.495902317857295
chr1cre10593	-0.186360209683783	87	0.0839369432734691	0.773334957080856	0.05	0.374191089064397
chr1cre10599	0.137931261641719	76	0.234747728180175	0.86102533186605	0.139	0.551664127675009
chr1cre10604	0.170434296891802	77	0.138351121562348	0.803779334498728	0.078	0.446125498867013
chr1cre10606	-0.0233914812061064	72	0.845364604871163	0.982531219642758	0.841	0.960698601396246
chr1cre10611	-0.118805614828484	64	0.34977303080313	0.898087081252259	0.255255255255255	0.679760177534431
chr1cre10614	-0.0664437893414416	89	0.536145330024397	0.934988674240729	0.567	0.867199630264226
chr1cre10615	0.240263357248326	83	0.028679585364831	0.736840994681093	0.014	0.217374833518445
chr1cre10625	-0.202543931735799	46	0.177030600872448	0.829513511331069	0.169	0.590688504657489
chr1cre10643	0.215909090909091	65	0.0840998631694296	0.773334957080856	0.034	0.318879993713571
chr1cre10651	-0.110784961933239	59	0.403535331441849	0.913365382587619	0.374	0.7676389490627
chr1cre10657	-0.0961768774233139	68	0.435271911012424	0.917367933278805	0.356	0.756042799631858
chr1cre10659	-0.10432810619146	71	0.386574255902461	0.908268411301612	0.371	0.765893384456211
chr1cre10683	-0.160722875086369	44	0.297310674855521	0.880289144072071	0.181	0.605162607315703
chr1cre10684	0.0799324109764012	54	0.565590657695874	0.941759791937317	0.495495495495495	0.835356755575857
chr1cre10687	0.0166493326352823	73	0.888812973797262	0.988691010091683	0.896	0.975841925965407
chr1cre10689	-0.104380289314728	57	0.439694541900433	0.919022022438055	0.316633266533066	0.72910064483757
chr1cre10693	0.0122299897617557	79	0.914809709612724	0.99048348457516	0.919	0.981658498949775
chr1cre10703	-0.0754411008445754	79	0.508747009288463	0.928688240495249	0.492	0.833357721750333
chr1cre10710	-0.0950390661068607	66	0.447811089324048	0.92088242312396	0.345345345345345	0.74907011524163
chr1cre10713	-0.149676654075356	49	0.304662703632207	0.883789573138401	0.226034308779011	0.65388503352913
chr1cre10714	-0.185308623692599	58	0.163728123469131	0.814774348212282	0.113340020060181	0.513581381627014
chr1cre10727	-0.0669104212884994	64	0.599358893464704	0.949003440632612	0.556	0.862872479045423
chr1cre10732	0.103583611411719	76	0.373222410865693	0.905263470728869	0.351	0.752643369640114
chr1cre10733	0.00217350221232209	71	0.985647475130601	0.997883891877348	0.98	0.995033959236942
chr1cre10737	-0.0746204806942482	87	0.492142509289065	0.9264531748513	0.536	0.85412811056877
chr1cre10764	-0.0638461622181863	81	0.571215318218869	0.943469471599968	0.536	0.85412811056877
chr1cre10769	0.153981459583098	60	0.240128311485356	0.862118496445549	0.169169169169169	0.590950964146161
chr1cre10770	-0.228586364831364	67	0.0628055870130838	0.755474869297024	0.045	0.357839044693538
chr1cre10780	-0.29672016513856	86	0.00553420407552589	0.722088729034198	0.001	0.0476979678985569
chr1cre10782	0.115250783232466	56	0.397647983528289	0.912073402715042	0.299299299299299	0.715867667862478
chr1cre10812	-0.27684719634237	45	0.065613472636965	0.755474869297024	0.0320962888665998	0.311176304802595
chr1cre10819	-0.0249340993829693	85	0.820802813266818	0.980100412970776	0.759	0.936824340649744
chr1cre10829	-0.0265115406922578	69	0.82880365441355	0.980757101922383	0.818	0.95368246013824
chr1cre10833	0.0123114810386756	59	0.926263931197702	0.991805594846126	0.918	0.981461901414888
chr1cre10837	0.0377239708252208	64	0.767268993858204	0.972773268861274	0.772	0.940647171024509
chr1cre10844	-0.132356853495665	53	0.344780870023338	0.897592004604428	0.32032032032032	0.731529151164374
chr1cre10846	0.140985463884807	72	0.2374933268984	0.86102533186605	0.203	0.630625570107153
chr1cre10860	-0.155523338422288	48	0.291181169686205	0.880158966929115	0.178	0.601469915524386
chr1cre10862	-0.0618223569754811	73	0.603348605456489	0.949003440632612	0.552	0.861199924568916
chr1cre10868	0.0288697689982947	80	0.799334831586848	0.976625137189342	0.77	0.940198330814976
chr1cre10884	-0.0264524347306553	65	0.834319551082273	0.981512244326894	0.846	0.961913913256259
chr1cre10888	-0.191317814279524	74	0.102494055510166	0.780492258060468	0.04	0.340896799029679
chr1cre10894	-0.16278189413237	68	0.184736029836755	0.835014414041261	0.151	0.567642322014363
chr1cre10908	-0.172772494587618	72	0.14669505737181	0.807252927183443	0.043	0.35096842034342
chr1cre10911	-0.106151108260403	90	0.319358082283278	0.888811524783552	0.336	0.742257380039411
chr1cre10917	0.0594732585087258	63	0.643355981057002	0.953370246777767	0.526	0.849539339110561
chr1cre10919	0.0604864141742815	50	0.676482305151838	0.958975982920198	0.635	0.893755425356227
chr1cre10922	-0.0384953648957745	60	0.77027174270131	0.97305985504536	0.774	0.941200914878972
chr1cre10929	0.211829636434081	27	0.28882091291738	0.880158966929115	0.196483971044467	0.62348654549526
chr1cre10931	-0.125008451370822	59	0.345491232181915	0.897741558351766	0.281	0.701212109173839
chr1cre10933	-0.101334200883119	79	0.374211474412838	0.905263470728869	0.319	0.730421949359057
chr1cre10934	-0.0675401872036477	57	0.617644930228365	0.95088654182396	0.599	0.879853797953466
chr1cre10937	-0.0179184328029466	51	0.90068125791111	0.989883351852832	0.880880880880881	0.971862284504486
chr1cre10940	0.00222226611927048	70	0.985432991361352	0.997845550761765	0.983	0.995624277025151
chr1cre10942	-0.11498172224339	58	0.390082400899632	0.910278186690793	0.242	0.668470854574179
chr1cre10958	NA	NA	NA	NA	NA	NA
chr1cre10961	0.0740662785713366	64	0.560801270399387	0.939722520589907	0.491491491491492	0.833357721750333
chr1cre10962	0.0135272614403988	58	0.919723126961199	0.991110047525296	0.922	0.982261627176562
chr1cre10964	0.0552008054960307	79	0.62896521733369	0.95088654182396	0.596	0.878677631064248
chr1cre10969	-0.0132476479233174	73	0.911426663699931	0.99048348457516	0.915	0.980842108257066
chr1cre10970	-0.283122063369845	45	0.0594895285163618	0.753478616984927	0.0240963855421687	0.276245172660359
chr1cre10976	-0.216894008106928	71	0.0692422744157272	0.76003873209169	0.011	0.194228614455715
chr1cre10979	-0.277525902272907	76	0.0152157713599311	0.729726480868395	0.015	0.223633667006159
chr1cre10987	0.0220544518647502	62	0.864897299760712	0.985353843001974	0.865461847389558	0.967511048604638
chr1cre10990	-0.0292243414471597	86	0.789387039305626	0.975309222361136	0.735	0.929213174509702
chr1cre10998	-0.0218582498493987	53	0.876541894978933	0.98648765284822	0.837837837837838	0.959805763873647
chr1cre11006	-0.286149005022354	66	0.0198483367592055	0.729726480868395	0.005	0.129352147858396
chr1cre11010	0.049827287912244	59	0.707828064626147	0.963292093676093	0.683	0.911844099924038
chr1cre11016	-0.00378072509162072	54	0.978354018733277	0.996999335445122	0.976976976976977	0.994709358482184
chr1cre11024	-0.0507176390574781	71	0.674456677971575	0.958871336806568	0.607	0.883050616733286
chr1cre11029	-0.0581171134407903	66	0.64299407776964	0.953370246777767	0.598	0.879458891369854
chr1cre11032	0.0578828761416306	51	0.686611955069082	0.960960258015032	0.601208459214502	0.880892904181237
chr1cre11035	-0.0870983452393047	90	0.414334233569805	0.914961430641835	0.423	0.796487509992006
chr1cre11043	0.109232862188163	41	0.496605719998411	0.927455042974312	0.427704752275025	0.799273588125833
chr1cre11072	-0.240401695805514	55	0.0770701787186067	0.768236047259877	0.0370741482965932	0.330668260496771
chr1cre11075	0.0291443331325316	53	0.835886038803886	0.981512244326894	0.799	0.948499667527595
chr1cre11078	-0.146139487460118	74	0.214081757129471	0.851184974060369	0.163	0.583091750859505
chr1cre11086	0.221444263896713	84	0.0429324318001901	0.746556056704078	0.023	0.270615867384022
chr1cre11092	0.0675401872036477	57	0.617644930228366	0.95088654182396	0.491	0.832940815795791
chr1cre11094	0.021217674773918	72	0.859581523973028	0.984332764767006	0.848	0.96250379288537
chr1cre11095	0.00470027788864341	47	0.97498568891554	0.996632929694835	0.976	0.994640604485571
chr1cre11101	-0.147565565433802	60	0.26051868539389	0.870538929276585	0.191	0.616267461880166
chr1cre11102	-0.0221882432692848	86	0.839307557425698	0.982037240005048	0.847	0.962238114535852
chr1cre11108	0.0525566854711705	60	0.690029998762081	0.961083586429361	0.639278557114228	0.89550056011076
chr1cre11112	-0.0365375797050371	78	0.750797969113305	0.970118560406112	0.751	0.934029381893113
chr1cre11119	-0.238816114832624	66	0.053467655138255	0.752521174222688	0.016	0.230210720124511
chr1cre11129	0.0399111675398482	76	0.732119510042031	0.967374502498128	0.687	0.91329495404754
chr1cre11133	-0.152152917172434	71	0.205263833545456	0.848646578015023	0.231	0.658323702141603
chr1cre11135	0.0379087245862739	75	0.746770077716777	0.96902997816705	0.726	0.926098303198051
chr1cre11139	0.193414202090697	77	0.0919118490016707	0.777939178483228	0.053	0.383180770413544
chr1cre11146	-0.227958865906642	48	0.11915959827564	0.789029528886147	0.0374873353596758	0.333537381404699
chr1cre11155	-0.0072860832831329	53	0.958704543973127	0.994789086403262	0.95190380761523	0.989566548686126
chr1cre11156	0.0556141270272758	83	0.617517618099618	0.95088654182396	0.641	0.89602110772274
chr1cre11163	-0.225588788453198	62	0.0779104153836465	0.769946194941427	0.044	0.354427496389918
chr1cre11174	0.0925984939104361	79	0.416986260592915	0.915510797387374	0.301	0.717118890254609
chr1cre11180	-0.122690888185117	46	0.416616626134551	0.915510797387374	0.319277108433735	0.730891613369986
chr1cre11182	-0.248177690089812	58	0.0603230059429381	0.755474869297024	0.03	0.303258272783857
chr1cre11188	-0.0594369209824521	54	0.669431583398445	0.958318175518916	0.575	0.870466828821994
chr1cre11200	0.225141729927289	81	0.0432998660179509	0.746773701831409	0.015	0.223633667006159
chr1cre11206	0.0723009419097834	72	0.546144522764557	0.937861083214204	0.482	0.828512607937731
chr1cre11212	-0.0614129605550647	57	0.649962484092901	0.954365625755465	0.637	0.894446295004216
chr1cre11222	-0.0698856557814612	64	0.583185421498715	0.946642361429292	0.603	0.881469408687183
chr1cre11228	-0.200871015928435	59	0.127133799403471	0.795969102273637	0.0750750750750751	0.43969914385689
chr1cre11239	0.00495478739876288	51	0.972472676981627	0.996632929694835	0.958	0.990947646405875
chr1cre11246	0.0725900877743741	62	0.575013434415663	0.944091915222746	0.47	0.822023800930175
chr1cre11247	-0.0723009419097834	72	0.546144522764557	0.937861083214204	0.592	0.877111163526133
chr1cre11256	-0.131842894070781	72	0.2696052042332	0.872455563729034	0.192	0.617532063377677
chr1cre11258	0.0113088174460146	57	0.93346131286289	0.992367427167827	0.938693467336683	0.986305760018332
chr1cre11265	-0.144041732661131	75	0.217602826630685	0.851184974060369	0.229	0.656385006041862
chr1cre11276	0.0785839589006002	56	0.56482038115454	0.94145451293893	0.484	0.829441113912283
chr1cre11278	-0.0278111602070529	77	0.810255274997254	0.978006043570085	0.785	0.944326280623608
chr1cre11281	0.182119078019457	96	0.0757487337433707	0.767284899473745	0.027	0.289811194666917
chr1cre11296	0.0356839551052355	63	0.781281574288784	0.973847538286198	0.703219315895372	0.918747129135582
chr1cre11299	-0.121247081205507	44	0.433035608811698	0.917367933278805	0.327603640040445	0.73687796219517
chr1cre11301	-0.0385622410069204	69	0.753075135920349	0.970318477468278	0.75	0.933720546135212
chr1cre11303	0.223235048868204	85	0.0400100404083054	0.743921775202934	0.012	0.202292736896648
chr1cre11306	0.0612701988386432	88	0.570659514944371	0.943469471599968	0.569	0.867957340984314
chr1cre11313	-0.103773242065986	73	0.382282795989146	0.908062549947735	0.419	0.794206512324465
chr1cre11314	-0.0198714718849761	73	0.867473934857609	0.985718608737474	0.85	0.963168830821755
chr1cre11316	-0.284072490248375	58	0.0306896791334924	0.742698467893471	0.00700700700700701	0.15455140261861
chr1cre11319	NA	NA	NA	NA	NA	NA
chr1cre11332	0.0799047241069379	47	0.593408498683824	0.948462634122207	0.58316430020284	0.873728180657801
chr1cre11334	-0.120204996713762	64	0.344085710560386	0.897592004604428	0.329	0.737458999385437
chr1cre11347	-0.22996344448678	58	0.0824609287593115	0.773334957080856	0.0273279352226721	0.29191277856718
chr1cre11348	-0.118436972069104	85	0.280332629110839	0.876948108330973	0.223	0.650829828606828
chr1cre11360	-0.104786662630641	66	0.402404740215214	0.913259363111495	0.431	0.800947038552778
chr1cre11363	-0.170557628360366	82	0.125521597647523	0.794975084723921	0.108	0.504792702419666
chr1cre11381	0.212787776366261	77	0.0631683861685371	0.755474869297024	0.001	0.0476979678985569
chr1cre11383	-0.240425379535024	57	0.0716267430510687	0.764800510623344	0.0251256281407035	0.280729382278168
chr1cre11384	NA	NA	NA	NA	NA	NA
chr1cre11388	-0.0165449079882882	56	0.903670040117601	0.990356564595878	0.895895895895896	0.975841925965407
chr1cre11401	-0.294217936328674	58	0.0249747480906786	0.729726480868395	0	0.0476979678985569
chr1cre11406	-0.0777713771047819	63	0.544615251520902	0.937861083214204	0.508	0.841416740181954
chr1cre11421	NA	NA	NA	NA	NA	NA
chr1cre11422	0.281800930988317	19	0.242472692999308	0.862795841560311	0.154195011337868	0.572026644455927
chr1cre11445	0.129304202250262	80	0.252981959889593	0.868749416893769	0.153	0.570344264456997
chr1cre11447	0.156941650998649	65	0.21184555023473	0.850971585991502	0.145	0.559446403385049
chr1cre11449	0.0619198013972614	55	0.653364291824873	0.954778301086756	0.563	0.865644623341538
chr1cre11460	-0.00408016643066296	96	0.968528604536329	0.996177426619061	0.96	0.991371823130412
chr1cre11463	-0.0257063623849635	73	0.829081253490864	0.980757101922383	0.824	0.955544323877117
chr1cre11465	-0.0723009419097834	72	0.546144522764557	0.937861083214204	0.448	0.810146907353898
chr1cre11477	0.238218451172747	88	0.0254163317378242	0.729726480868395	0.013	0.210173668696643
chr1cre11481	-0.182225821780179	70	0.131086400611837	0.799248061619356	0.094	0.479278909315015
chr1cre11489	0.055975322574188	70	0.645335490209496	0.95368926285817	0.572	0.869292795154057
chr1cre11491	0.0959847192153434	72	0.422519721723045	0.916342356638566	0.309	0.723325061247024
chr1cre11492	-0.157749144614886	61	0.224674758719182	0.856921223069666	0.159	0.578309221531203
chr1cre11500	-0.00110548134969326	68	0.99286140413379	1	0.989	0.996772546700856
chr1cre11516	-0.10336227882434	53	0.461413313735249	0.921653137387473	0.446	0.809209223708633
chr1cre11521	0.00959653716749834	88	0.929289857155965	0.992300362135056	0.923	0.982401334203557
chr1cre11523	0.0912870929175277	71	0.448972990540316	0.92088242312396	0.393	0.779027378607869
chr1cre11528	0.0129959664613526	57	0.923562150915629	0.991170229163365	0.920920920920921	0.982010517779007
chr1cre11531	0.0888918624425444	72	0.457758189499089	0.92088242312396	0.397	0.78138549022566
chr1cre11541	0.0155274653888099	66	0.901518823630565	0.989937830252645	0.881	0.971862284504486
chr1cre11542	0.0707248244983339	35	0.686415490687113	0.960960258015032	0.647887323943662	0.898552017627412
chr1cre11546	0.00594732585087258	63	0.963102591546729	0.995490299255694	0.956827309236948	0.99076526818906
chr1cre11547	0.0312804564477508	79	0.784344220580557	0.974405511737079	0.727	0.926450647501475
chr1cre11557	0.114464161867566	73	0.33490729165653	0.894704164689112	0.252	0.677194848363341
chr1cre11572	0.0290184390963237	64	0.819941692800125	0.980100412970776	0.788	0.945226593111253
chr1cre11587	0.0515777189029079	90	0.62924416772882	0.95088654182396	0.597	0.879085914471885
chr1cre11591	-0.165501603840425	77	0.15030429136843	0.810071491449508	0.114	0.514167936495273
chr1cre11592	0.0591276830322349	84	0.593160286449117	0.948462634122207	0.526	0.849539339110561
chr1cre11600	0.0513794623509925	44	0.740478132515412	0.968578214999024	0.643724696356275	0.897216046264237
chr1cre11605	0.0958133063480243	74	0.416759601662807	0.915510797387374	0.412	0.790233556500498
chr1cre11610	-0.0454163322948235	67	0.715155314789126	0.964387229698157	0.649	0.899019875933663
chr1cre11611	-0.0174714139453653	79	0.878535675349254	0.986812136642905	0.858	0.965371705167931
chr1cre11623	-0.209639247108765	86	0.0527146073032286	0.751693758557364	0.024	0.276167597408312
chr1cre11626	-0.141902143926125	84	0.197887338233137	0.844138685929732	0.231	0.658323702141603
chr1cre11632	0.126794097643695	71	0.292028529083825	0.880158966929115	0.303	0.718678456052024
chr1cre11634	0.0772418430934386	83	0.487636752769185	0.925029378317644	0.514	0.844150785230592
chr1cre11638	-0.0928719514279821	56	0.496005279032756	0.927455042974312	0.491	0.832940815795791
chr1cre11643	-0.0238559361806849	83	0.830490681838278	0.98130911411649	0.82	0.954302025972244
chr1cre11654	0.0717592924887569	89	0.503962540222833	0.927455042974312	0.533	0.852736648476301
chr1cre11660	0.120232393344376	87	0.267317030514172	0.871306081633271	0.205	0.632948999189885
chr1cre11663	0.146926177338491	69	0.228313385342719	0.858334387923903	0.195	0.621184906227402
chr1cre11666	0.338383182679796	62	0.00714379782365566	0.722088729034198	0.002	0.0755549873125392
chr1cre11680	-0.264618873378578	55	0.0508969701761307	0.750292020374991	0.029	0.299064601683493
chr1cre11681	-0.0599042297873154	65	0.635486811636642	0.951598092055782	0.589	0.875891512018904
chr1cre11687	-0.151468599448063	60	0.247979858100472	0.866527843812429	0.24024024024024	0.667113947017019
chr1cre11690	-0.103448446231289	45	0.498886286383396	0.927455042974312	0.487462387161484	0.831373275407448
chr1cre11698	-0.00202901635303738	88	0.985031187510677	0.997845550761765	0.986	0.996232468917365
chr1cre11699	-0.0311458908822176	83	0.779848026944701	0.973613148946091	0.776	0.941995111459441
chr1cre11712	-0.106838040430911	65	0.39695560037239	0.912073402715042	0.352	0.753396962411898
chr1cre11718	0.216551996788391	78	0.0568684235733569	0.753478616984927	0.057	0.394357191105159
chr1cre11719	0.0100450647088411	87	0.926426896694947	0.991805594846126	0.929	0.983928216710797
chr1cre11720	-0.0558461707323022	53	0.691233396077194	0.961339875713325	0.640640640640641	0.89602110772274
chr1cre11732	-0.111910180819931	56	0.411558122573846	0.914523398872104	0.373	0.76703918180771
chr1cre11749	-0.0109566426978196	41	0.945794318715419	0.993641575457194	0.936	0.98558705639854
chr1cre11750	-0.0365534869641772	66	0.770756599656201	0.97305985504536	0.731462925851703	0.928080467374606
chr1cre11759	-0.0692991453158116	91	0.513937767479928	0.928688240495249	0.414	0.791420356176736
chr1cre11762	-0.177993885431241	62	0.166332950736944	0.818421334936771	0.112	0.511027509655307
chr1cre11770	0.154810520941857	86	0.154666060008255	0.811179623881527	0.137	0.549039154064272
chr1cre11772	0.0173736834287202	57	0.897933663930147	0.989458735213553	0.909	0.979303283140279
chr1cre11782	0.122919428248317	83	0.268263477701675	0.8718864610281	0.175	0.597956624224353
chr1cre11788	0.0659411342935911	90	0.536904573858803	0.935444017563829	0.487	0.830863116704138
chr1cre11799	0.00563123410333452	52	0.968395628816293	0.996177426619061	0.962776659959759	0.992141046473838
chr1cre11809	-0.110465714921497	57	0.413340727696009	0.914523398872104	0.382	0.772513080390146
chr1cre11816	-0.0613678629460269	69	0.616427723570951	0.95088654182396	0.669	0.906634723026828
chr1cre11818	-0.0283951205065496	56	0.835432854527185	0.981512244326894	0.816	0.95326745603703
chr1cre11822	-0.0419385630668549	50	0.772445896293916	0.973123730551194	0.809	0.951371053352332
chr1cre11831	0.074411682956068	85	0.498518101475128	0.927455042974312	0.563	0.865644623341538
chr1cre11841	0.307535041945809	53	0.0250846876548572	0.729726480868395	0.012	0.202292736896648
chr1cre11844	0.0187688516348531	78	0.870439619259359	0.986139813798368	0.861	0.96621481812317
chr1cre11845	-0.145722169854795	76	0.209101768825264	0.850971585991502	0.092	0.475166867148839
chr1cre11851	0.0222596570303491	74	0.85068214498865	0.983129299397297	0.81	0.951765011535344
chr1cre11852	-0.173925271309261	49	0.232015754653545	0.86102533186605	0.0812182741116751	0.453540635731625
chr1cre11853	-0.145078706902129	72	0.224010063736413	0.856901081209241	0.196	0.622418124795207
chr1cre11870	0	59	1	1	0.994	0.997307678428287
chr1cre11871	-0.132227212629995	59	0.318125436346395	0.888245693856186	0.281	0.701212109173839
chr1cre11876	-0.10654278925954	55	0.438811803235094	0.918509500187331	0.371457489878542	0.766418513119533
chr1cre11884	0.0760554899383683	87	0.483831812873089	0.925029378317644	0.42	0.794756326148079
chr1cre11885	0.00790445917514974	98	0.938426771094415	0.992631044901309	0.951	0.989330497454456
chr1cre11886	-0.0249739989529235	73	0.833880156167816	0.981512244326894	0.79	0.945762748952661
chr1cre11898	-0.119974744817146	39	0.466920245575832	0.922698435889669	0.370854271356784	0.765893384456211
chr1cre11902	-0.202393385618046	48	0.167714153098277	0.820243378666598	0.140562248995984	0.55427090359142
chr1cre11906	0.00447960820073665	51	0.975111757199093	0.996632929694835	0.968812877263581	0.993293376366702
chr1cre11916	-0.129184154177862	88	0.230309749547649	0.860231723183376	0.203	0.630625570107153
chr1cre11920	0.0549857399228215	55	0.690099021187212	0.961083586429361	0.668	0.906235593731318
chr1cre11927	-0.248177690089812	58	0.0603230059429381	0.755474869297024	0.015015015015015	0.223633667006159
chr1cre11936	0.195089716174238	93	0.0609330102754413	0.755474869297024	0.027	0.289811194666917
chr1cre11945	-0.069438729557841	63	0.588666493313431	0.947453382262888	0.55	0.860212193030183
chr1cre11946	0.0211619477845242	65	0.867117226981429	0.98555680612224	0.866	0.967511048604638
chr1cre11948	-0.390803368367358	34	0.0222980269898502	0.729726480868395	0.0082135523613963	0.167966081153334
chr1cre11952	-0.19580308769597	86	0.0707990008956806	0.763165810497596	0.042	0.347636505893051
chr1cre11954	-0.193676068632625	60	0.138146344718803	0.803627786065111	0.125	0.531051952606398
chr1cre11962	-0.156434033459948	67	0.206168925774996	0.849515536354552	0.113	0.512615864015086
chr1cre11967	-0.0601595138694564	52	0.671817538327476	0.958667561281804	0.662662662662663	0.90442953489775
chr1cre11968	0.0182611471773365	88	0.865899334241075	0.985433538958438	0.875	0.970213033728433
chr1cre11971	0.104242100572321	57	0.440303669897778	0.919108382224343	0.391	0.777676036682616
chr1cre11973	0.165254293602913	84	0.133036270885998	0.801020793451996	0.117	0.518704944387082
chr1cre11976	0.0993241131101173	50	0.492546908594314	0.926667527078453	0.435	0.803209892000174
chr1cre11980	0.106324914573211	72	0.374040453944577	0.905263470728869	0.367	0.763453090311423
chr1cre11985	-0.130871502863223	76	0.259802847815332	0.870538929276585	0.138	0.550367727978178
chr1cre12008	-0.220584884188007	52	0.116085504147648	0.789029528886147	0.0600600600600601	0.402713933986172
chr1cre12010	-0.123764628685644	67	0.318359191085538	0.888245693856186	0.278	0.698686000074093
chr1cre12014	-0.0856832044746765	67	0.4905602084045	0.925553680730264	0.429429429429429	0.800265118160354
chr1cre12030	0.0696938086559279	87	0.521237548285429	0.929885652253113	0.431	0.800947038552778
chr1cre12038	-0.0410529024916371	69	0.737683639125589	0.968123850108395	0.713	0.921839424905758
chr1cre12044	-0.121920179942888	63	0.341152601101146	0.897163782270324	0.232	0.659262649956437
chr1cre12056	-0.0440567110531401	47	0.768721816198498	0.972773268861274	0.74248496993988	0.931508534214475
chr1cre12062	-0.121854359168988	89	0.255301826814041	0.869510146598459	0.199	0.625868764603345
chr1cre12074	-0.00467514363430674	85	0.966128233325342	0.995752505461319	0.973	0.994068141910106
chr1cre12084	-0.189928059778976	70	0.115299932060721	0.788952436335365	0.1	0.490750734240947
chr1cre12087	-0.430282299360382	55	0.00104211037149285	0.718813047186448	0	0.0476979678985569
chr1cre12089	0.0469057862996463	76	0.687419319294872	0.960960258015032	0.587	0.875227251348369
chr1cre12099	0.0110729275009596	88	0.918446183406809	0.990975979256493	0.902	0.977405589825993
chr1cre12101	0.04146566396872	57	0.759410539205068	0.971408658907065	0.729	0.927118473888054
chr1cre12103	0.118651012884639	83	0.28536358705022	0.878474127774014	0.266	0.688735025380711
chr1cre12109	-0.216894008106928	71	0.0692422744157272	0.76003873209169	0.016	0.230210720124511
chr1cre12120	-0.0333212461845964	67	0.78893973672252	0.975163127680799	0.777	0.942352427569784
chr1cre12125	-0.16666777666408	64	0.188076307013486	0.835698334092435	0.195	0.621184906227402
chr1cre12133	-0.118882372522821	76	0.306379278724384	0.884326887076544	0.254	0.678788825160721
chr1cre12143	-0.125486335779308	76	0.280093075115376	0.876948108330973	0.204	0.63167837874846
chr1cre12146	-0.332910154289668	51	0.0169845107211409	0.729726480868395	0.012012012012012	0.202292736896648
chr1cre12152	-0.10752258439611	58	0.421758128520523	0.916342356638566	0.392	0.778336898176603
chr1cre12160	-0.0555560145766747	64	0.662818284196956	0.956884456729695	0.626	0.890383559346198
chr1cre12161	0.0568220953203952	69	0.642825530084739	0.953370246777767	0.545	0.857970046596246
chr1cre12163	-0.0663962125428551	64	0.602174113460836	0.949003440632612	0.638	0.894884758364312
chr1cre12180	-0.046926950861121	52	0.741134702984752	0.968578214999024	0.720440881763527	0.924420328091926
chr1cre12187	0.095529244576965	77	0.408550475356274	0.914428266272763	0.274	0.695044481005085
chr1cre12197	-0.0117081523334895	84	0.915818223877056	0.990551860456204	0.915	0.980842108257066
chr1cre12212	-0.0749938279224683	63	0.559120168743914	0.939722520589907	0.517	0.84554360131532
chr1cre12227	-0.123717914826348	49	0.397034531626492	0.912073402715042	0.294416243654822	0.712279548668776
chr1cre12229	-0.10051925197649	65	0.425620440697464	0.91701623457784	0.401	0.783806076597115
chr1cre12247	-0.187439498562524	83	0.0897283955980484	0.776012231181963	0.068	0.422945137157107
chr1cre12254	0.125019934614591	56	0.358581480863245	0.901862576759492	0.264529058116232	0.687831180557681
chr1cre12263	-0.135760895450981	56	0.318446134542165	0.888245693856186	0.344	0.747873634015498
chr1cre12281	0.147644506283383	75	0.206192730939821	0.849515536354552	0.154	0.571603269611652
chr1cre12288	0.0642057883124102	91	0.545417127518907	0.937861083214204	0.545	0.857970046596246
chr1cre12306	-0.109121936598082	77	0.344809899703607	0.897592004604428	0.364	0.761358623666523
chr1cre12331	0.0255476154010634	64	0.841179174800706	0.982192684205186	0.822	0.954922646976225
chr1cre12333	0.0544352629989004	52	0.701511834748259	0.962552803407408	0.740480961923848	0.931027940244991
chr1cre12335	0.172566207795004	72	0.147185365336918	0.807252927183443	0.098	0.487209192572074
chr1cre12344	0.0522466931138982	86	0.632826389382738	0.951045362851692	0.551	0.860740364467001
chr1cre12375	0.0202296961029298	88	0.851600188323717	0.983332549590405	0.855	0.964584322803376
chr1cre12376	-0.180625254672437	41	0.25842373677894	0.869770741015067	0.208040201005025	0.636294924090263
chr1cre12383	-0.0265298416560023	54	0.848975729763112	0.983095615761145	0.827655310621243	0.956741958999584
chr1cre12391	0.13609589065371	72	0.254322039451354	0.868749416893769	0.168	0.589316422406501
chr1cre12395	0.0661031439964953	46	0.662493655208438	0.956884456729695	0.62962962962963	0.891798685446009
chr1cre12398	-0.158723746883719	56	0.242639467484583	0.862795841560311	0.16	0.579683841749979
chr1cre12416	0.0104176356138495	85	0.924611648588125	0.991651864019431	0.907	0.97876821811472
chr1cre12420	0.0265474944595188	81	0.814010596060578	0.979050958530361	0.779	0.942937233476907
chr1cre12427	-0.0395421650087955	73	0.739778143886611	0.968578214999024	0.672	0.907936221654843
chr1cre12444	-0.0803458681470212	88	0.456792675458695	0.92088242312396	0.443	0.807563044810129
chr1cre12457	-0.0857118853895868	62	0.507726546650079	0.928688240495249	0.46	0.816362095305862
chr1cre12465	0.0609224782736286	66	0.627015549032475	0.95088654182396	0.566	0.866764478555305
chr1cre12470	-0.142079570262523	76	0.22083335461943	0.853352847763546	0.203	0.630625570107153
chr1cre12477	0.0937215433496337	74	0.427051136008741	0.917242304003024	0.326	0.735385063510009
chr1cre12479	-0.14285298997286	51	0.317299009734077	0.888245693856186	0.277	0.697635571197339
chr1cre12501	-0.11188697236011	45	0.464326003714587	0.921708471401675	0.376376376376376	0.769489968294154
chr1cre12503	-0.0107228079159456	92	0.919196236546219	0.991110047525296	0.901	0.977199192970788
chr1cre12519	0.045785077175052	47	0.759913220724827	0.971408658907065	0.701	0.917958406683344
chr1cre12521	0.0449077931085287	90	0.674273909604171	0.958871336806568	0.713	0.921839424905758
chr1cre12531	-0.0064649287175071	93	0.950958671975488	0.994139653878292	0.951	0.989330497454456
chr1cre12542	0.164617522180933	88	0.125363203566292	0.794975084723921	0.068	0.422945137157107
chr1cre12547	-0.118905604399471	60	0.365529074446701	0.902447256283414	0.283283283283283	0.703421980734505
chr1cre12551	-0.145545434106865	55	0.289026415990659	0.880158966929115	0.223	0.650829828606828
chr1cre12557	-0.0378915718102618	80	0.738607148621403	0.968123850108395	0.673	0.908278369521698
chr1cre12561	-0.0694224215699284	86	0.525334946891936	0.931682598354127	0.474	0.824301970756516
chr1cre12566	-0.108737864350716	84	0.32482580961642	0.889529409420143	0.379	0.770890522591671
chr1cre12568	-0.122735725892054	69	0.315041844277146	0.886524761466403	0.363	0.760796359457255
chr1cre12574	0.0140082953670131	53	0.920697641796971	0.991110047525296	0.905	0.978296843728887
chr1cre12575	0.108021222822078	89	0.313638793046781	0.886027311667871	0.322	0.732480142709605
chr1cre12580	0.0856171543301525	59	0.519087611482599	0.929296722793657	0.457	0.814866501256347
chr1cre12584	-0.265844083859463	53	0.0543542194740182	0.752521174222688	0.031	0.307477592708398
chr1cre12599	-0.217970604157227	57	0.103348038487897	0.780492258060468	0.0641925777331996	0.413581726794119
chr1cre12603	0.119416286805306	50	0.408801234405238	0.914428266272763	0.322322322322322	0.732938099995819
chr1cre12607	0.137816371765787	53	0.325066312990152	0.889735508076312	0.226	0.653808086924632
chr1cre12609	-0.0706541222576927	73	0.552516821890654	0.939302720180695	0.449	0.810594010293311
chr1cre12623	-0.0292445263024887	89	0.785583323060815	0.974769549029572	0.782	0.94368594553249
chr1cre12644	-0.0357199813184547	56	0.793816156170623	0.975748376007797	0.772	0.940647171024509
chr1cre12646	-0.0116921084438734	56	0.931843866066016	0.992367427167827	0.917	0.981241426666107
chr1cre12649	0.202428251619626	52	0.150095535116148	0.810071491449508	0.0710710710710711	0.430136842048486
chr1cre12650	0.0950267799955016	87	0.381294094864644	0.908062549947735	0.353	0.754019559193955
chr1cre12666	0.0837982332959739	75	0.474742781790965	0.923876750202617	0.432	0.801514382763657
chr1cre12670	-0.109612739115111	78	0.339412636921184	0.896893479410596	0.272	0.693440440131979
chr1cre12676	-0.0249340993829693	85	0.820802813266818	0.980100412970776	0.819	0.954012177281437
chr1cre12679	0.108021222822078	89	0.313638793046781	0.886027311667871	0.228	0.65571288312349
chr1cre12681	-0.10508804812591	35	0.547974640434432	0.937861083214204	0.484135107471853	0.829651692573772
chr1cre12696	-0.0818369929058412	88	0.448453986583013	0.92088242312396	0.391	0.777676036682616
chr1cre12697	-0.113717250651262	54	0.412926021814517	0.914523398872104	0.335	0.741632043785752
chr1cre12713	0.162801704110838	59	0.217954131218865	0.851184974060369	0.111	0.509381216516045
chr1cre12722	0.0631601705182314	74	0.592920507558344	0.948313809252221	0.648	0.898552017627412
chr1cre12724	0.0239045721866879	55	0.862467657841488	0.984887921787682	0.865055387713998	0.967354202581878
chr1cre12741	0.172121747775659	63	0.177366485448589	0.829957598734659	0.078	0.446125498867013
chr1cre12743	-0.13302361520892	66	0.286974880038586	0.879397709437957	0.29	0.708722666916432
chr1cre12744	-0.140962981688972	48	0.339244080621189	0.896893479410596	0.334008097165992	0.740928356413039
chr1cre12750	-0.20689662489864	67	0.0929803812794199	0.778523737982501	0.043	0.35096842034342
chr1cre12763	-0.0133335967156229	70	0.912763844428723	0.99048348457516	0.91	0.979525078857346
chr1cre12782	0.0367315443346227	69	0.764450130808814	0.971987322939362	0.755	0.935574117844761
chr1cre12794	-0.162775079467732	61	0.210063057110751	0.850971585991502	0.18	0.604004115307758
chr1cre12798	0.0784757185120223	91	0.459662124095493	0.921158174470689	0.444	0.808156860219901
chr1cre12799	-0.193032448650776	73	0.101790883253359	0.780492258060468	0.08	0.450699397100101
chr1cre12803	0.0709745507598933	76	0.542354551830357	0.936766191796826	0.518	0.845975801287452
chr1cre12806	-0.0109886915363738	51	0.938996072368238	0.992631044901309	0.932	0.984697862320082
chr1cre12807	-0.146328524345177	73	0.216713432684929	0.851184974060369	0.13	0.539047723827686
chr1cre12810	-0.332389940047257	56	0.0123184400247005	0.722088729034198	0.001	0.0476979678985569
chr1cre12814	0.180378470327258	45	0.235732330407885	0.86102533186605	0.187187187187187	0.612270312992568
chr1cre12820	-0.156130652425399	53	0.264247593973774	0.870538929276585	0.248	0.673860873465987
chr1cre12824	-0.215710472049778	49	0.13659785812709	0.802932309069944	0.0981963927855711	0.487656659673093
chr1cre12826	-0.17791856317489	82	0.109781804440752	0.784711707993542	0.147	0.562048491816583
chr1cre12850	-0.126156478596732	67	0.3090233100798	0.884872583091633	0.269	0.690954194022278
chr1cre12855	-0.0563830653663306	88	0.60182855191102	0.949003440632612	0.603	0.881469408687183
chr1cre12870	0.0899380448491079	80	0.427556755019466	0.917367933278805	0.351	0.752643369640114
chr1cre12872	0.0733380430840643	79	0.520666258584595	0.929627817604368	0.473	0.823724289828881
chr1cre12877	-0.0547657856948859	84	0.620750226309511	0.95088654182396	0.579	0.872081374386118
chr1cre12882	-0.105546868927918	63	0.410349060579109	0.914428266272763	0.34	0.744916905337209
chr1cre12883	0.0657082460198449	58	0.624094439354543	0.95088654182396	0.625	0.889856742304044
chr1cre12889	-0.129049044932221	62	0.317483986875002	0.888245693856186	0.285285285285285	0.705125726584954
chr1cre12893	0.0654491927982665	91	0.537646359645703	0.935444017563829	0.614	0.885618546662188
chr1cre12896	0.169046693181317	88	0.115376819697818	0.788952436335365	0.063	0.410593825427408
chr1cre12897	0.0870061496106457	73	0.464205214637579	0.921708471401675	0.403	0.78506586801809
chr1cre12902	0.079075952431863	64	0.534525130294421	0.934256792828574	0.519	0.846333532041729
chr1cre12904	0.049879900771413	75	0.6708498432306	0.958616842869364	0.703	0.918531352919198
chr1cre12907	-0.181266414036117	64	0.151727650140569	0.811179623881527	0.065	0.415532924146635
chr1cre12912	-0.0340351646828421	46	0.822329430930945	0.980100412970776	0.795386158475426	0.947574750037727
chr1cre12914	0.0871684851746727	87	0.422076759279941	0.916342356638566	0.303	0.718678456052024
chr1cre12922	-0.0944366721986637	63	0.461605680207748	0.921653137387473	0.413	0.790850270126849
chr1cre12936	-0.179287322487869	61	0.166805527389418	0.819013622914969	0.068	0.422945137157107
chr1cre12940	-0.0827479949944011	61	0.526080149944153	0.932006546669786	0.482	0.828512607937731
chr1cre12941	0.189469362891553	102	0.056484691440207	0.753478616984927	0.018	0.242241232375959
chr1cre12945	-0.181559949194516	65	0.147773295127688	0.807456931154202	0.113	0.512615864015086
chr1cre12949	0.241254772181644	57	0.0706239532924763	0.7628157992923	0.038	0.333978168368457
chr1cre12950	-0.0314485451016576	79	0.783213683543432	0.974405511737079	0.748	0.933059347028236
chr1cre12955	-0.132685132658558	82	0.234702636996418	0.86102533186605	0.169	0.590688504657489
chr1cre12961	0.16428102060932	85	0.13299429512839	0.801020793451996	0.168	0.589316422406501
chr1cre12963	0.0611227456628046	74	0.604925601735142	0.949003440632612	0.551	0.860740364467001
chr1cre12973	0.20727509006864	59	0.115209005488836	0.788952436335365	0.064	0.413086369950336
chr1cre12984	0.0570392435360493	76	0.62454847915599	0.95088654182396	0.563	0.865644623341538
chr1cre12991	-0.128040719090922	58	0.338137424030164	0.896070626332374	0.265	0.687831180557681
chr1cre12995	-0.100338750574643	54	0.470350862758042	0.922698435889669	0.495486459378134	0.835356755575857
chr1cre12997	0.0846319305418032	39	0.608475348130879	0.949935304036015	0.493387589013225	0.834287390029326
chr1cre13021	-0.0142019094330649	73	0.905075055106929	0.99048348457516	0.891	0.97453295585357
chr1cre13023	0.159363814577919	55	0.245165284611508	0.865046351597657	0.185483870967742	0.610719234901798
chr1cre13028	-0.0499201914894295	65	0.69291180719893	0.96197585901595	0.742	0.931279704090961
chr1cre13035	-0.111008657321586	61	0.394377519661104	0.911833573431552	0.25	0.675415959793872
chr1cre13041	-0.166204994022121	59	0.208355100755221	0.850729339529492	0.194	0.619990653765345
chr1cre13042	-0.0642416074439621	71	0.594551839495798	0.948462634122207	0.577	0.871269555967143
chr1cre13057	-0.248069469178417	51	0.0792248689203991	0.769946194941427	0.051567239635996	0.379849960238205
chr1cre13058	0.022237479499833	71	0.853956085465135	0.98378008006512	0.875	0.970213033728433
chr1cre13070	0.0263437397938931	59	0.843002094734637	0.982478270968788	0.796	0.947574750037727
chr1cre13092	-0.125764228307804	52	0.374332374622269	0.905263470728869	0.281	0.701212109173839
chr1cre13101	0.178232496443535	77	0.120937957729593	0.790202418982706	0.044	0.354427496389918
chr1cre13106	0.234791673429527	94	0.0227341007435365	0.729726480868395	0.009	0.175867419974833
chr1cre13118	-0.124646392502318	65	0.322517688989341	0.888966464740321	0.305	0.720234261328432
chr1cre13126	-0.0909153525126324	69	0.457515824987911	0.92088242312396	0.420841683366733	0.795313142901697
chr1cre13130	0.065196514324722	71	0.589073049949486	0.947621122673629	0.511	0.842894755964102
chr1cre13131	-0.0889175996034685	36	0.606063474051665	0.949003440632612	0.525150905432596	0.849304313573285
chr1cre13133	-0.020082879204294	83	0.856989968566274	0.984284360765521	0.842	0.961002711996716
chr1cre13142	-0.265565491969553	79	0.0180097496078985	0.729726480868395	0.006	0.143064803714096
chr1cre13144	0.124800478723574	65	0.321915160356837	0.888953028913872	0.224	0.651852644944321
chr1cre13146	-0.0404593922058596	88	0.708204005236062	0.963469524663326	0.668	0.906235593731318
chr1cre13153	0.0212779066994102	80	0.85139305717283	0.983332549590405	0.823	0.955207613924874
chr1cre13155	-0.0694841693984601	76	0.550887145619543	0.938760214069571	0.567	0.867199630264226
chr1cre13166	0.20835749577211	75	0.0728346410311313	0.766131634654613	0.045	0.357839044693538
chr1cre13176	0.0245514308070118	80	0.828854350128976	0.980757101922383	0.792	0.946336801910653
chr1cre13177	-0.0557278212575353	55	0.686131748050423	0.960960258015032	0.612612612612613	0.885233924253261
chr1cre13196	0.0644773150598267	64	0.612730728619397	0.950871470834583	0.526	0.849539339110561
chr1cre13197	0.181209073969552	45	0.233546214516757	0.86102533186605	0.148073022312373	0.563597312713499
chr1cre13202	-0.0999945921098844	68	0.417178855728097	0.915510797387374	0.318	0.729678854336488
chr1cre13204	-0.086511833616761	80	0.445439958459153	0.92088242312396	0.393	0.779027378607869
chr1cre13213	-0.019054914310345	75	0.8710984151567	0.986139813798368	0.856	0.964842847506289
chr1cre13214	-0.301631285447552	59	0.0202511781840403	0.729726480868395	0.00700700700700701	0.15455140261861
chr1cre13223	-0.0243951571500427	87	0.822535450373406	0.980100412970776	0.813	0.952587163177331
chr1cre13227	0.014549591546411	77	0.900056071850217	0.989804826144612	0.874	0.96990001406778
chr1cre13257	-0.121844956547257	66	0.329760005115598	0.890913728005275	0.206	0.634143262939132
chr1cre13267	NA	NA	NA	NA	NA	NA
chr1cre13268	NA	NA	NA	NA	NA	NA
chr1cre13270	0.123263126885587	49	0.398785682800766	0.912073402715042	0.285571142284569	0.705442518806749
chr1cre13292	0.0919444914746992	85	0.402643203324635	0.913259363111495	0.245	0.671318168232453
chr1cre13295	-0.151906583703223	61	0.242532269862175	0.862795841560311	0.182	0.60621231710603
chr1cre13296	0.0033818153600997	58	0.979899791822766	0.997145087519942	0.965	0.992528457158105
chr1cre13302	0.158297138138717	58	0.235301731744468	0.86102533186605	0.179	0.602819225194099
chr1cre13310	-0.133278497495796	37	0.431636725273443	0.917367933278805	0.373360242179617	0.767527801483525
chr1cre13322	-0.0396802581845353	74	0.737124654377069	0.968123850108395	0.703	0.918531352919198
chr1cre13333	0.05926955847702	71	0.623439481308299	0.95088654182396	0.549	0.85977006856114
chr1cre13351	-0.218968189213062	67	0.0750309068482155	0.767284899473745	0.02	0.254638625854361
chr1cre13352	-0.257088986170562	65	0.0386974628737667	0.742698467893471	0.012	0.202292736896648
chr1cre13356	-0.103864523120867	45	0.497151902322222	0.927455042974312	0.471	0.822602137803911
chr1cre13362	0.175306283165113	41	0.272942740854477	0.874581730853876	0.176530612244898	0.600195477447217
chr1cre13364	0.22237479499833	71	0.0623334761449608	0.755474869297024	0.02	0.254638625854361
chr1cre13365	-0.0936745898038992	64	0.461579858574611	0.921653137387473	0.386386386386386	0.775355752828007
chr1cre13368	-0.220628820773855	59	0.0931160763603158	0.778523737982501	0.063	0.410593825427408
chr1cre13372	0.120134150545697	83	0.279341705641588	0.876948108330973	0.194	0.619990653765345
chr1cre13379	0.0129540811784581	74	0.912772106851782	0.99048348457516	0.9	0.976870500143995
chr1cre13383	-0.214397292379339	71	0.0725871063931218	0.765735412030455	0.055	0.388815006970327
chr1cre13391	0.0581894190677901	52	0.68198415336855	0.960068271747981	0.614	0.885618546662188
chr1cre13393	-0.0527734344639591	63	0.68123779957781	0.959772753047621	0.624	0.889597982599924
chr1cre13398	-0.111691519166492	46	0.459908147356174	0.921158174470689	0.367101303911735	0.763621679981041
chr1cre13403	-0.132899727848998	76	0.252426048921049	0.868749416893769	0.203	0.630625570107153
chr1cre13425	0.00758114382427005	75	0.948530058690373	0.993839281910615	0.948	0.988644352004722
chr1cre13428	0.0690539342823739	64	0.587686661047903	0.947453382262888	0.536	0.85412811056877
chr1cre13435	-0.264820448851425	43	0.086132310342434	0.77446825804086	0.041123370110331	0.344448462556844
chr1cre13437	-0.209036608507466	51	0.140985862421591	0.807185183042306	0.081	0.45289555929186
chr1cre13438	-0.0191499209990789	77	0.868702758250866	0.985834701006642	0.875	0.970213033728433
chr1cre13452	-0.12349809887112	42	0.435864713905157	0.917367933278805	0.474371859296482	0.824834469200095
chr1cre13453	0.150867301828271	89	0.158170665380527	0.81393017735667	0.187	0.611970805595755
chr1cre13459	0.0349605101474861	79	0.759698722493162	0.971408658907065	0.724	0.925394990598423
chr1cre13473	0.182290749700515	83	0.0990630451613173	0.780345632291252	0.121	0.525154398311048
chr1cre13491	-0.0407004260277095	59	0.759556091610456	0.971408658907065	0.737737737737738	0.930187300041989
chr1cre13502	0.0577409191501275	70	0.634934393541905	0.951510845857946	0.53	0.851293724340731
chr1cre13514	0.0663962125428551	64	0.602174113460835	0.949003440632612	0.605	0.882278986582058
chr1cre13534	-0.175085511854602	61	0.177136897352339	0.829517464005502	0.122	0.526724588244279
chr1cre13548	0.214243739949846	81	0.0547835735252776	0.752521174222688	0.035	0.322695901786211
chr1cre13550	NA	NA	NA	NA	NA	NA
chr1cre13558	-0.0138877459115682	63	0.913973185575395	0.99048348457516	0.876	0.970500181270066
chr1cre13568	-0.15724317177621	59	0.234289629124348	0.86102533186605	0.165829145728643	0.586946431363556
chr1cre13576	0.166329828050248	50	0.248317739549621	0.866527843812429	0.170511534603811	0.593141835902432
chr1cre13577	-0.025717224993682	55	0.852151407060074	0.983332549590405	0.837675350701403	0.959805763873647
chr1cre13586	0.164226141909797	67	0.184182011294097	0.834783983025262	0.178	0.601469915524386
chr1cre13595	0.21989395492869	88	0.0395361261048097	0.742698467893471	0.059	0.400066919977452
chr1cre13599	0.223744562462495	74	0.0553234994358873	0.753478616984927	0.016	0.230210720124511
chr1cre13601	-0.0576556660197055	79	0.613764780265492	0.950871470834583	0.656	0.901727183942748
chr1cre13603	-0.0906519218198673	65	0.472659395387229	0.923009864578143	0.351351351351351	0.753130153123834
chr1cre13617	0.295629112409483	55	0.0284284772859323	0.736840994681093	0.012	0.202292736896648
chr1cre13619	-0.0420040540909121	81	0.70965079212864	0.963809961735279	0.668	0.906235593731318
chr1cre13626	0.178097189345467	81	0.111675510746067	0.786066483163982	0.143	0.556867836746522
chr1cre13630	0.20244749698857	99	0.0444730081529239	0.748137929864844	0.078	0.446125498867013
chr1cre13640	0.0786213627541439	79	0.490992676305178	0.925776685769155	0.449	0.810594010293311
chr1cre13647	0.0311676242287116	85	0.777050002510881	0.973123730551194	0.765	0.93855004626283
chr1cre13662	0.17409594046349	67	0.158833747288453	0.814447246377875	0.188	0.613019591256032
chr1cre13667	0.0470445405818215	81	0.676641056237299	0.958975982920198	0.719	0.923877998795368
chr1cre13680	0.0149760574468288	65	0.905747024015703	0.99048348457516	0.904904904904905	0.978296843728887
chr1cre13687	0.128613192882607	43	0.411109279998321	0.914523398872104	0.322289156626506	0.732938099995819
chr1cre13691	0.124713893995559	100	0.216349883806444	0.851184974060369	0.105	0.499554112432675
chr1cre13702	0.0729694704006249	57	0.589595528796456	0.947673569946854	0.534	0.853261988656705
chr1cre13706	0.157811443814662	86	0.146730187660254	0.807252927183443	0.075	0.439570626349892
chr1cre13715	-0.171449549265476	71	0.15282417285041	0.811179623881527	0.113	0.512615864015086
chr1cre13724	0.133522681617113	80	0.237696887733574	0.86102533186605	0.249	0.67464872636649
chr1cre13725	-0.0075142671699151	66	0.952250706858276	0.994247027048606	0.957957957957958	0.990947646405875
chr1cre13727	-0.0518163247138324	74	0.661062273361377	0.956482657253398	0.62	0.888027091963196
chr1cre13739	0.142146446705064	75	0.223780539652776	0.856427507817601	0.16	0.579683841749979
chr1cre13741	0.184803855487496	61	0.15392078751953	0.811179623881527	0.121	0.525154398311048
chr1cre13746	-0.127506457454826	53	0.362902836515333	0.902447256283414	0.288288288288288	0.707557352946449
chr1cre13752	0.13253515110494	90	0.213034394414434	0.851077552224791	0.202	0.629585647025613
chr1cre13754	-0.182171904724119	56	0.179020205466625	0.831579075644632	0.0981963927855711	0.487656659673093
chr1cre13758	0.133284984738386	67	0.282258494032851	0.878249047200807	0.193	0.618788680208324
chr1cre13764	0.228229375758651	71	0.055580790255309	0.753478616984927	0.017	0.236227142463168
chr1cre13765	0.0587038007510133	83	0.598081653019422	0.949003440632612	0.554108216432866	0.862161314611021
chr1cre13769	0.0997116551611311	85	0.363904602825139	0.902447256283414	0.307	0.721771411936761
chr1cre13771	-0.0909737258912406	75	0.437610605000948	0.917721473708968	0.461	0.816969891068676
chr1cre13773	-0.0191969438430687	72	0.872837477242092	0.986153123597864	0.875	0.970213033728433
chr1cre13779	-0.042513499429043	72	0.722899820752625	0.965742969696851	0.633	0.893030378399062
chr1cre13793	-0.0283538853633504	68	0.818462129829333	0.98006059884944	0.802	0.949399572135032
chr1cre13794	0.0203742485542682	74	0.863201752151724	0.984887921787682	0.864	0.966980539663057
chr1cre13816	0.00964039797055813	87	0.929383025268022	0.992300362135056	0.912	0.980048230635197
chr1cre13822	0.0790654914357225	68	0.521582812187883	0.92991612567555	0.542	0.856690450228796
chr1cre13825	-0.0266671934312458	70	0.82654459827931	0.980757101922383	0.818	0.95368246013824
chr1cre13829	0.126238771473924	92	0.230493636705664	0.860637068329271	0.17	0.592012032360067
chr1cre13832	0.0199972022198306	98	0.845047127966168	0.982531219642758	0.846	0.961913913256259
chr1cre13836	-0.0338648014560313	86	0.756908846298492	0.971170250694208	0.776	0.941995111459441
chr1cre13844	0.0556223204141057	77	0.630891206826547	0.95088654182396	0.645	0.897540172546059
chr1cre13860	0.111817049250338	51	0.434689980495508	0.917367933278805	0.384924623115578	0.774401643767382
chr1cre13877	0.0488006055076882	66	0.69719108063805	0.962053931154953	0.674	0.908623383085327
chr1cre13885	0.0740085083863771	103	0.457507473599102	0.92088242312396	0.415	0.79201524741891
chr1cre13889	0.109663057604653	80	0.332872861837171	0.893755752539173	0.253	0.677986102280575
chr1cre13913	0.0335026393031881	90	0.753916674391696	0.970428126115837	0.711	0.921272746025319
chr1cre13914	-0.136176194850481	55	0.321519137667327	0.888953028913872	0.324649298597194	0.73476622121505
chr1cre13918	0.0490138264335864	78	0.670001597822145	0.958318175518916	0.636	0.894131500853794
chr1cre13925	0.0321340850141434	61	0.80580101908172	0.977198617234624	0.757028112449799	0.936240351034177
chr1cre13928	-0.193849528633816	47	0.191687186826463	0.838161300292811	0.16016016016016	0.580010106727664
chr1cre13929	0.0958133063480243	74	0.416759601662807	0.915510797387374	0.379	0.770890522591671
chr1cre13930	0.0786512463367641	81	0.48521386968595	0.925029378317644	0.399	0.782615421979357
chr1cre13932	0.0321479831866092	56	0.8140471083824	0.979050958530361	0.787575150300601	0.945226593111253
chr1cre13937	-0.169049681319621	67	0.171451026387585	0.823701924279794	0.144	0.558050343815664
chr1cre13938	0.0750051658229217	69	0.540192952313206	0.935444017563829	0.526	0.849539339110561
chr1cre13942	0.174798192204659	64	0.167129409522089	0.819791813597625	0.095	0.481259744914723
chr1cre13962	-0.0206196524710581	55	0.881219964301049	0.987277791478222	0.896896896896897	0.976047277941559
chr1cre13965	0.148823365912136	85	0.174035239055147	0.825839992179345	0.168	0.589316422406501
chr1cre13971	0.00119965147989165	95	0.99079423859489	0.99907098293183	0.987	0.996322848095992
chr1cre13976	0.0120319027738913	52	0.93253394904978	0.992367427167827	0.914658634538153	0.980842108257066
[truncated: 341,599 more rows]
