# Supplementary material for: Complementary evolution of coding and noncoding sequence underlies mammalian hairlessness
Source: eLife. 2022 Nov 7;11:e76911. doi: 10.7554/eLife.76911 (PMC9803358; doi:10.7554/eLife.76911)
Supplement: Figure 1—source data 4. — Results from branch-site models to test for positive selection on KRTs, KRTAPs, and genes under accelerated evolution in hairless species. [file elife-76911-fig1-data4.csv]

	X	m1.x	bs1	bs2	LRTbs1m1	LRTbs2bs1	AccPval	PosSelPval	AccPvaladj	PosSelPvaladj	m1.y	m2	m8	m8a	LRTm2m1	LRTm8m8a	pvalm2m1	pvalm8m8a	pvalm2m1adj	pvalm8m8adj
155	KRTAP5-5	-3445.301122	-3439.597578	-3416.35563	5.703544	23.241948	0.000731644	9.24E-12	0.001532602	1.84E-09	-2797.466017	-2720.249821	-2721.477675	-2797.494235	77.216196	76.01656	1.86E-35	6.23E-35	1.85E-33	1.24E-32
111	KRTAP19-1	-3111.254487	-3111.090553	-3090.40712	0.163934	20.683433	0.566917192	1.26E-10	0.641002961	1.11E-08	-2066.763649	-2055.764881	-2055.989614	-2066.792783	10.998768	10.803169	2.73E-06	3.35E-06	1.04E-05	1.67E-05
153	KRTAP5-3	-2890.357757	-2890.232719	-2869.826695	0.125038	20.406024	0.617021569	1.68E-10	0.693713515	1.11E-08	-2192.565805	-2166.264564	-2165.22598	-2192.498048	26.301241	27.272068	4.08E-13	1.52E-13	4.28E-12	2.33E-12
156	KRTAP5-6	-2450.500837	-2448.564385	-2433.198672	1.936452	15.365713	0.049071546	2.96E-08	0.075227208	1.47E-06	-1724.121943	-1702.102002	-1702.94448	-1724.284426	22.019941	21.339946	3.22E-11	6.45E-11	2.78E-10	8.55E-10
165	KRTAP9-4	-4693.262097	-4693.094081	-4678.89449	0.168016	14.199591	0.562128631	9.87E-08	0.641002961	3.93E-06	-3571.071436	-3559.683455	-3561.654994	-3569.045746	11.387981	7.390752	1.82E-06	0.000120714	7.39E-06	0.000358538
136	KRTAP29-1	-14418.13004	-14418.11883	-14405.17084	0.01121	12.947998	0.880975196	3.60E-07	0.963264088	1.20E-05	-12051.73475	-11993.8074	-11993.38377	-12050.81477	57.92735	57.430999	5.11E-27	8.44E-27	2.54E-25	8.39E-25
94	KRTAP10-5	-6902.085198	-6902.085197	-6889.479541	1.00E-06	12.605656	0.998871622	5.14E-07	1	1.46E-05	-5129.701229	-5117.69273	-5107.993912	-5117.264695	12.008499	9.270783	9.55E-07	1.66E-05	4.32E-06	6.49E-05
133	KRTAP25-1	-4867.73396	-4877.76712	-4866.202281	-10.03316	11.564839	1	1.51E-06	1	3.77E-05	-3513.448619	-3516.02713	-3512.488278	-3516.83194	-2.578511	4.343662	1	0.003204307	1	0.007246104
118	KRTAP19-8	-2450.788964	-2450.788623	-2441.591046	0.000341	9.197577	0.979165509	1.80E-05	1	0.000396925	-1954.217752	-1943.248385	-1942.94923	-1954.064615	10.969367	11.115385	2.81E-06	2.42E-06	1.06E-05	1.23E-05
146	KRTAP4-5	-6927.510873	-6925.908184	-6917.101425	1.602689	8.806759	0.073396547	2.71E-05	0.105839948	0.000538609	-5262.582906	-5236.644014	-5233.634895	-5239.159839	25.938892	5.524944	5.91E-13	0.000886926	5.88E-12	0.002262797
140	KRTAP4-1	-4332.318854	-4325.078921	-4316.450482	7.239933	8.628439	0.000141666	3.27E-05	0.000335613	0.000575754	-3641.309405	-3621.974618	-3615.91705	-3633.284756	19.334787	17.367706	5.02E-10	3.78E-09	3.84E-09	3.13E-08
167	KRTAP9-7	-4985.844347	-4985.754651	-4977.184529	0.089696	8.570122	0.671896268	3.47E-05	0.738714681	0.000575754	-3633.731261	-3626.590046	-3626.626962	-3632.924463	7.141215	6.297501	0.000157327	0.00038678	0.000413697	0.001040124
151	KRTAP5-1	-3886.671505	-3874.231587	-3866.438538	12.439918	7.793049	6.10E-07	7.88E-05	1.95E-06	0.001206737	-2772.317379	-2719.668122	-2721.833197	-2740.312041	52.649257	18.478844	1.05E-24	1.21E-09	3.48E-23	1.33E-08
83	KRTAP1-1	-4647.825403	-4641.29049	-4634.494214	6.534913	6.796276	0.000300091	0.000227085	0.000678615	0.003227847	-3633.512326	-3622.151628	-3608.730021	-3618.511945	11.360698	9.781924	1.87E-06	9.73E-06	7.45E-06	4.50E-05
159	KRTAP6-3	-2542.638008	-2542.542257	-2535.990583	0.095751	6.551674	0.661669445	0.000294768	0.735598992	0.003910595	-2086.865558	-2055.366195	-2055.487643	-2086.622396	31.499363	31.134753	2.07E-15	3.00E-15	2.57E-14	7.45E-14
166	KRTAP9-6	-4017.748791	-4017.342535	-4011.356959	0.406256	5.985576	0.367378618	0.000540305	0.443080878	0.006720047	-3269.189059	-3251.006801	-3256.840753	-3269.339327	18.182258	12.498574	1.64E-09	5.74E-07	1.16E-08	3.46E-06
107	KRTAP13-4	-7451.057602	-7450.331042	-7444.520603	0.72656	5.810439	0.228027981	0.000652156	0.289029097	0.007209948	-5612.419425	-5566.556589	-5568.421929	-5607.500013	45.862836	39.078084	9.96E-22	9.52E-19	2.20E-20	2.71E-17
143	KRTAP4-2	-5009.63385	-5008.826117	-5002.989316	0.807733	5.836801	0.20372515	0.000633932	0.259880159	0.007209948	-3752.697056	-3707.416919	-3689.360917	-3707.761414	45.280137	18.400497	1.79E-21	1.31E-09	3.57E-20	1.37E-08
168	KRTAP9-8	-4387.368543	-4384.043876	-4378.440706	3.324667	5.60317	0.009919289	0.000815183	0.017315251	0.008537974	-3234.586645	-3228.636855	-3226.682691	-3231.670276	5.94979	4.987585	0.000561466	0.001586653	0.001346166	0.003850537
116	KRTAP19-6	-2309.487141	-2308.631991	-2303.196033	0.85515	5.435958	0.190946452	0.000976335	0.245150606	0.00971453	-1636.182529	-1627.760935	-1627.727489	-1636.224431	8.421594	8.496942	4.06E-05	3.75E-05	0.000126237	0.000130923
152	KRTAP5-2	-3618.27708	-3608.340751	-3603.39888	9.936329	4.941871	8.28E-06	0.001667455	2.20E-05	0.01580112	-2525.89734	-2474.503192	-2477.388843	-2524.734173	51.394148	47.34533	3.73E-24	2.23E-22	1.06E-22	1.11E-20
105	KRTAP13-2	-8583.310648	-8581.857131	-8576.983612	1.453517	4.873519	0.088193932	0.001796119	0.122160934	0.016246712	-6658.872221	-6643.791992	-6647.050252	-6658.881916	15.080229	11.831664	3.98E-08	1.15E-06	2.14E-07	6.17E-06
163	KRTAP9-2	-5462.898671	-5461.085008	-5456.270234	1.813663	4.814774	0.056838069	0.001914717	0.083783524	0.016566467	-3893.910119	-3860.056168	-3855.546141	-3883.369395	33.853951	27.823254	1.90E-16	8.67E-14	2.70E-15	1.44E-12
97	KRTAP10-8	-9162.230669	-9157.992271	-9153.422446	4.238398	4.569825	0.003597051	0.002501289	0.006627899	0.020739858	-6899.144912	-6895.393296	-6871.249751	-6874.52818	3.751616	3.278429	0.006158837	0.010448069	0.013178587	0.021001673
96	KRTAP10-7	-8731.242741	-8729.957211	-8725.856406	1.28553	4.100805	0.108834783	0.004185323	0.145356522	0.033315174	-6178.315159	-6161.655853	-6154.873482	-6164.162912	16.659306	9.28943	7.82E-09	1.63E-05	4.72E-08	6.49E-05
157	KRTAP6-1	-1793.437113	-1784.68138	-1780.872093	8.755733	3.809287	2.86E-05	0.005777015	7.19E-05	0.044216385	-1331.803723	-1325.853152	-1327.179975	-1331.799107	5.950571	4.619132	0.000560995	0.002370095	0.001346166	0.005421253
123	KRTAP20-1	-2254.225328	-2254.225666	-2251.01757	-0.000338	3.208096	1	0.011308439	1	0.083347386	-1642.559583	-1635.988489	-1636.086385	-1642.580036	6.571094	6.493651	0.000288721	0.000313611	0.000727283	0.000866785
154	KRTAP5-4	-2438.559489	-2436.163885	-2433.613405	2.395604	2.55048	0.028605358	0.023912606	0.046280213	0.169950304	-2114.943721	-2086.137686	-2086.301991	-2114.839994	28.806035	28.538003	3.19E-14	4.19E-14	3.74E-13	7.59E-13
113	KRTAP19-3	-3466.753049	-3466.753049	-3464.631556	0	2.121493	1	0.039412791	1	0.270453287	-2533.439119	-2527.968371	-2528.037555	-2540.954188	5.470748	12.916633	0.000940342	3.72E-07	0.002150898	2.41E-06
112	KRTAP19-2	-2233.438013	-2232.201451	-2230.198464	1.236562	2.002987	0.115807546	0.045339294	0.153638011	0.300750647	-1596.213809	-1582.350761	-1582.02027	-1596.176968	13.863048	14.156698	1.40E-07	1.03E-07	6.95E-07	7.60E-07
114	KRTAP19-4	-4102.4374	-4100.600183	-4098.658453	1.837217	1.94173	0.055253011	0.048763965	0.082054844	0.303250905	-3042.783156	-3025.772922	-3025.689976	-3042.811229	17.010234	17.121253	5.45E-09	4.87E-09	3.62E-08	3.87E-08
164	KRTAP9-3	-4844.616748	-4838.13132	-4836.168701	6.485428	1.962619	0.000316377	0.047566457	0.000707406	0.303250905	-3675.804012	-3668.402581	-3669.416093	-3674.468286	7.401431	5.052193	0.000119354	0.001479169	0.000325363	0.003634007
27	KRT1	-21378.02569	-21352.77784	-21350.93095	25.247848	1.846887	1.19E-12	0.054615906	7.87E-12	0.310530438	-18094.52664	-18082.47988	-17988.09497	-18001.46641	12.046762	13.37144	9.18E-07	2.32E-07	4.25E-06	1.65E-06
135	KRTAP27-1	-9163.575384	-9161.910887	-9160.059096	1.664497	1.851791	0.068068497	0.054295788	0.099600227	0.310530438	-7496.972533	-7486.795574	-7488.326738	-7496.984401	10.176959	8.657663	6.44E-06	3.17E-05	2.29E-05	0.00011456
144	KRTAP4-3	-7521.622643	-7520.440686	-7518.546357	1.181957	1.894329	0.124170298	0.051601005	0.162565062	0.310530438	-5515.088575	-5498.290177	-5472.870793	-5473.538132	16.798398	0.667339	6.78E-09	0.247974699	4.35E-08	0.397959396
117	KRTAP19-7	-2336.857242	-2336.857242	-2335.066905	0	1.790337	1	0.058455429	1	0.323128624	-1770.932038	-1759.263448	-1759.525826	-1770.989211	11.66859	11.463385	1.36E-06	1.68E-06	5.64E-06	8.81E-06
128	KRTAP21-3	-2286.435141	-2284.804106	-2283.066903	1.631035	1.737203	0.070899574	0.062325095	0.102985512	0.335207942	-1843.120515	-1830.516938	-1830.520488	-1842.948529	12.603577	12.428041	5.15E-07	6.18E-07	2.50E-06	3.62E-06
91	KRTAP10-2	-8422.072478	-8416.585999	-8414.992472	5.486479	1.593527	0.000924511	0.074223661	0.001885036	0.388697595	-7192.647936	-7182.999937	-7161.877601	-7170.279034	9.647999	8.401433	1.12E-05	4.15E-05	3.71E-05	0.000142287
130	KRTAP22-2	-1879.48478	-1877.298262	-1875.88586	2.186518	1.412402	0.036511884	0.092818223	0.05676457	0.473610931	-1547.755675	-1540.671751	-1540.579244	-1547.756875	7.083924	7.177631	0.000167203	0.000151356	0.000432123	0.00043652
158	KRTAP6-2	-1829.322439	-1824.948477	-1823.683399	4.373962	1.265078	0.003099547	0.111689174	0.005764578	0.555653639	-1429.967726	-1423.67654	-1424.401295	-1429.991437	6.291186	5.590142	0.000389402	0.000826711	0.000968638	0.002136565
108	KRTAP15-1	-6592.72849	-6592.530157	-6591.444204	0.198333	1.085953	0.528816116	0.140551936	0.60829137	0.682191106	-5128.875897	-5120.567228	-5120.113871	-5128.724682	8.308669	8.610811	4.57E-05	3.33E-05	0.000137886	0.000118202
132	KRTAP24-1	-10801.19605	-10801.19599	-10800.29101	5.70E-05	0.904981	0.991481086	0.178512788	1	0.845810593	-9074.646152	-9074.646189	-9067.925543	-9071.3996	-3.70E-05	3.474057	1	0.008390765	1	0.017576444
115	KRTAP19-5	-3001.557558	-2990.58025	-2989.718196	10.977308	0.862054	2.79E-06	0.189165113	7.72E-06	0.855542215	-2287.430339	-2279.418904	-2279.209553	-2287.326116	8.011435	8.116563	6.26E-05	5.60E-05	0.000185878	0.000182709
129	KRTAP22-1	-2078.882926	-2077.674586	-2076.80114	1.20834	0.873446	0.120049118	0.186267929	0.158210427	0.855542215	-1682.378007	-1675.240782	-1675.299985	-1682.530567	7.137225	7.230582	0.000157995	0.000143079	0.000413697	0.000418717
1	ACADM	-10394.91583	-10378.32335	-10378.32119	16.592477	0.002161	8.38E-09	0.947583298	3.40E-08	1	-8434.199437	-8429.063949	-8388.821429	-8393.506306	5.135488	4.684877	0.001351393	0.002205951	0.003055991	0.005104469
2	ANXA11	-12462.00658	-12459.75624	-12459.75624	2.250335	0	0.033881576	1	0.053511377	1	-9843.456522	-9843.45657	-9804.698896	-9801.27335	-4.80E-05	-3.425546	1	1	1	1
3	AP1M1	-7539.209216	-7537.746543	-7537.746543	1.462673	0	0.08719853	1	0.122160934	1	-6242.853165	-6242.853162	-6242.764235	-6242.764229	3.00E-06	-6.00E-06	0.998045592	1	1	1
4	ATP2A1	-22187.42918	-22171.40064	-22171.40064	16.028534	0	1.50E-08	1	5.73E-08	1	-17733.90579	-17733.9058	-17614.92089	-17615.42716	-4.00E-06	0.506277	1	0.314291756	1	0.48483767
5	C1orf95	-2403.912494	-2397.627307	-2397.627307	6.285187	0	0.00039191	1	0.000847719	1	-1856.865011	-1856.865011	-1846.244535	-1846.244535	0	0	1	1	1	1
6	CAMK2A	-7891.079506	-7891.079518	-7891.079512	-1.20E-05	6.00E-06	1	0.997236052	1	1	-6580.787407	-6580.782551	-6579.140692	-6579.140767	0.004856	7.50E-05	0.921495984	0.990228194	1	1
7	CDH23	-79335.50748	-79283.39354	-79283.39354	52.113938	0	1.80E-24	1	3.59E-23	1	-64016.06444	-64016.06472	-63439.48931	-63416.00213	-0.000274	-23.487175	1	1	1	1
8	CNOT7	-3711.994039	-3711.994039	-3711.99404	0	-1.00E-06	1	1	1	1	-3030.116377	-3028.06505	-3026.867728	-3026.86782	2.051327	9.20E-05	0.042815954	0.989177299	0.084360146	1
9	COL17A1	-48740.4371	-48727.8597	-48727.8597	12.577403	0	5.29E-07	1	1.73E-06	1	-39534.75661	-39500.79384	-39400.26249	-39440.78239	33.962778	40.519891	1.70E-16	2.21E-19	2.60E-15	7.34E-18
10	DSP	-75522.22184	-75423.66128	-75423.66128	98.560555	0	8.87E-45	1	3.53E-43	1	-59863.59069	-59863.59069	-59270.99225	-59270.99225	0	0	1	1	1	1
11	EDAR	-13182.10209	-13176.55112	-13176.55112	5.550967	0	0.000862377	1	0.001787636	1	-10587.94437	-10587.94445	-10465.51635	-10465.51635	-8.00E-05	0	1	1	1	1
12	ESRRG	-7310.269985	-7307.02397	-7307.023963	3.246015	7.00E-06	0.010835917	0.997014596	0.018750848	1	-6002.324861	-6002.324864	-5993.727278	-5993.72744	-3.00E-06	0.000162	1	0.985638853	1	1
13	FAM78B	-3210.742212	-3184.271943	-3184.271943	26.470269	0	3.44E-13	1	2.36E-12	1	-2543.770907	-2543.768429	-2543.904652	-2543.904652	0.002478	0	0.943876196	1	1	1
14	FBXL20	-5943.554503	-5939.345627	-5939.331094	4.208876	0.014533	0.003715749	0.864626736	0.006783799	1	-5107.087572	-5107.087575	-5102.657817	-5102.655466	-3.00E-06	-0.002351	1	1	1	1
15	FGF11	-3668.48237	-3654.675494	-3654.675494	13.806876	0	1.48E-07	1	5.20E-07	1	-2852.70326	-2852.70326	-2846.27886	-2846.27886	0	0	1	1	1	1
16	FOXN1	-16696.74842	-16693.89708	-16693.89708	2.851335	0	0.016939126	1	0.028326773	1	-13652.86252	-13652.86256	-13599.70996	-13599.72557	-4.50E-05	0.015608	1	0.859759357	1	1
17	GID8	-4674.181838	-4674.181838	-4674.181838	0	0	1	1	1	1	-3849.183027	-3849.183027	-3841.224146	-3841.224146	0	0	1	1	1	1
18	GLRA4	-8616.614116	-8601.452885	-8601.452885	15.161231	0	3.66E-08	1	1.37E-07	1	-6965.279052	-6965.279052	-6925.989748	-6927.087478	0	1.09773	1	0.138417882	1	0.23147192
19	HIST1H2BG	-2832.33646	-2832.814652	-2832.814652	-0.478192	0	1	1	1	1	-2075.714726	-2075.713467	-2076.011893	-2076.011893	0.001259	0	0.959979206	1	1	1
20	HMGCL	-8926.015001	-8921.902565	-8921.902565	4.112436	0	0.004132012	1	0.007475185	1	-7053.903396	-7047.037212	-7022.483511	-7032.751808	6.866184	10.268297	0.00021079	5.85E-06	0.000537785	2.77E-05
21	HOXA13	-3347.191087	-3333.390281	-3333.390281	13.800806	0	1.49E-07	1	5.20E-07	1	-2317.336849	-2317.336849	-2317.158841	-2317.345054	0	0.186213	1	0.541684851	1	0.810490867
22	HR	-38495.20098	-38473.10862	-38473.10862	22.092358	0	2.99E-11	1	1.52E-10	1	-30976.11361	-30976.11514	-30883.39136	-30885.66979	-0.001526	2.278436	1	0.032786903	1	0.058780124
23	IGSF22	-34734.99012	-34693.08125	-34693.08125	41.908867	0	5.43E-20	1	6.00E-19	1	-24965.14963	-24965.14963	-24936.17175	-24926.73346	0	-9.438299	1	1	1	1
24	ING4	-3566.664202	-3555.589329	-3555.589329	11.074873	0	2.52E-06	1	7.07E-06	1	-2879.631045	-2879.631057	-2872.613592	-2872.612547	-1.20E-05	-0.001045	1	1	1	1
25	JAZF1	-3702.135254	-3647.629244	-3647.286237	54.50601	0.343007	1.61E-25	0.407523485	4.01E-24	1	-2870.375183	-2870.375186	-2869.38245	-2869.381741	-3.00E-06	-0.000709	1	1	1	1
26	KCNJ11	-8668.675164	-8656.248152	-8656.248152	12.427012	0	6.18E-07	1	1.95E-06	1	-6970.734379	-6964.920518	-6906.340785	-6910.297714	5.813861	3.956929	0.000649761	0.004905754	0.001521205	0.010727967
28	KRT10	-16381.86562	-16343.67279	-16343.14778	38.19283	0.525009	2.33E-18	0.305502941	2.21E-17	1	-12725.26581	-12706.04144	-12671.58696	-12691.62968	19.224368	20.042727	5.62E-10	2.43E-10	4.14E-09	2.85E-09
29	KRT12	-16752.8984	-16746.95073	-16746.95073	5.947666	0	0.000562748	1	0.001191349	1	-13183.82452	-13183.82452	-13130.19015	-13133.54085	0	3.350701	1	0.009633713	1	0.019969884
30	KRT121P	-8183.737782	-8173.172231	-8173.172231	10.565551	0	4.29E-06	1	1.17E-05	1	-6088.428192	-6088.428192	-6057.19623	-6057.19623	0	0	1	1	1	1
31	KRT13	-13692.84535	-13688.38229	-13688.38229	4.463064	0	0.002811197	1	0.005327887	1	-10488.56464	-10488.56464	-10375.58662	-10379.60189	0	4.015269	1	0.004599518	1	0.010170044
32	KRT14	-11573.19082	-11561.97423	-11561.97423	11.216588	0	2.18E-06	1	6.28E-06	1	-9085.849781	-9077.492415	-8992.838903	-8999.876484	8.357366	7.037581	4.34E-05	0.000175648	0.000133	0.000499342
33	KRT15	-13934.70948	-13894.11368	-13894.11368	40.595807	0	2.05E-19	1	2.04E-18	1	-10684.34256	-10683.21989	-10550.77238	-10552.03409	1.122668	1.261711	0.134017795	0.112166938	0.256437896	0.189162887
34	KRT16	-15447.71661	-15438.92037	-15438.92037	8.796246	0	2.74E-05	1	6.98E-05	1	-11666.2007	-11662.54947	-11612.39511	-11612.62367	3.651232	0.22856	0.006886012	0.49897303	0.014577833	0.752239643
35	KRT16P2	-5747.374643	-5740.20604	-5740.20604	7.168603	0	0.000152815	1	0.000353606	1	-4308.583249	-4308.583249	-4281.606022	-4281.606022	0	0	1	1	1	1
36	KRT17	-10367.32736	-10365.47996	-10365.47996	1.847396	0	0.054582587	1	0.081668683	1	-7817.183197	-7817.183229	-7717.701107	-7717.701107	-3.20E-05	0	1	1	1	1
37	KRT18	-12067.49641	-12067.12458	-12067.12458	0.371838	0	0.388485863	1	0.462926268	1	-10019.42095	-10019.42095	-9925.202161	-9925.989917	0	0.787756	1	0.20940834	1	0.341575899
38	KRT2	-22714.10786	-22638.10915	-22637.61994	75.998707	0.489207	6.34E-35	0.322590678	2.10E-33	1	-17826.16085	-17826.16085	-17749.3291	-17757.63658	0	8.307483	1	4.58E-05	1	0.000154438
39	KRT20	-16521.65218	-16520.30837	-16520.30837	1.343813	0	0.101130385	1	0.136731525	1	-13674.68478	-13654.16965	-13637.74046	-13655.28714	20.515125	17.546681	1.50E-10	3.14E-09	1.24E-09	2.84E-08
40	KRT222	-6816.224054	-6814.777976	-6814.603321	1.446078	0.174655	0.089011736	0.554503982	0.122160934	1	-5819.361882	-5819.361882	-5776.413845	-5776.799764	0	0.385919	1	0.379649052	1	0.581155088
41	KRT23	-15521.05732	-15504.10213	-15504.10213	16.955189	0	5.77E-09	1	2.44E-08	1	-11695.85672	-11695.85672	-11610.39251	-11611.95749	0	1.564986	1	0.076865061	1	0.134176729
42	KRT24	-18659.35644	-18647.09996	-18647.0939	12.256482	0.006059	7.38E-07	0.912344512	2.30E-06	1	-15064.15829	-15064.15829	-15013.0864	-15013.13129	0	0.044887	1	0.764464665	1	1
43	KRT25	-12054.57496	-12044.14121	-12044.14121	10.433754	0	4.92E-06	1	1.32E-05	1	-9918.438062	-9918.438063	-9848.141904	-9848.22821	-1.00E-06	0.086306	1	0.677800797	1	0.991782049
44	KRT26	-18834.31922	-18785.238	-18785.238	49.081219	0	3.85E-23	1	5.48E-22	1	-14770.96235	-14770.96235	-14683.26251	-14684.10132	0	0.838801	1	0.195243395	1	0.321102774
45	KRT27	-14909.08768	-14886.55497	-14886.55497	22.532703	0	1.91E-11	1	1.02E-10	1	-11285.33306	-11285.33306	-11170.20162	-11168.93839	-1.00E-06	-1.263234	1	1	1	1
46	KRT28	-15613.55209	-15562.6854	-15562.6854	50.866687	0	6.35E-24	1	1.05E-22	1	-11706.57524	-11706.57534	-11633.30874	-11633.30874	-0.000104	0	1	1	1	1
47	KRT3	-18913.62528	-18912.7555	-18913.62528	0.869779	-0.869779	0.187194841	1	0.241894632	1	-15620.83009	-15605.72558	-15535.20557	-15552.66878	15.104504	17.46321	3.88E-08	3.42E-09	2.14E-07	2.96E-08
48	KRT31	-12158.59451	-12142.1512	-12142.1512	16.443311	0	9.77E-09	1	3.89E-08	1	-9297.983877	-9297.983877	-9153.74184	-9153.74184	0	0	1	1	1	1
49	KRT32	-15942.36764	-15933.64997	-15933.64997	8.717665	0	2.97E-05	1	7.30E-05	1	-12379.08699	-12374.55974	-12202.56569	-12206.49842	4.52725	3.932739	0.002620491	0.00503875	0.005794196	0.010899036
50	KRT33A	-10325.29351	-10293.14553	-10293.14552	32.147979	4.00E-06	1.07E-15	0.997743244	9.26E-15	1	-7800.539696	-7797.932276	-7658.66969	-7661.775896	2.60742	3.106206	0.022394908	0.012685767	0.045475374	0.024749682
51	KRT33B	-11227.27504	-11203.41267	-11203.41267	23.86237	0	4.90E-12	1	2.96E-11	1	-8476.76033	-8476.760522	-8335.100047	-8335.343756	-0.000192	0.243709	1	0.485081342	1	0.73687929
52	KRT34	-13004.41685	-12979.1943	-12979.1943	25.222552	0	1.23E-12	1	7.87E-12	1	-9575.858833	-9575.859045	-9446.861406	-9450.754575	-0.000212	3.893169	1	0.005264279	1	0.011264425
53	KRT35	-13648.30281	-13637.19095	-13637.19095	11.111862	0	2.43E-06	1	6.90E-06	1	-10536.56391	-10536.56394	-10423.42351	-10423.42493	-3.10E-05	0.001423	1	0.957454704	1	1
54	KRT36	-15039.6443	-15033.27972	-15033.27972	6.364579	0	0.000359999	1	0.00078725	1	-11701.48267	-11701.48267	-11574.87027	-11576.27739	0	1.407118	1	0.093431371	1	0.161676894
55	KRT37	-19389.43891	-19361.52615	-19361.52615	27.912767	0	7.92E-14	1	5.84E-13	1	-15522.77959	-15515.11073	-15436.49098	-15439.39208	7.668859	2.901097	8.99E-05	0.01600619	0.000257341	0.030335541
56	KRT38	-18758.97549	-18712.99495	-18712.99495	45.980534	0	8.84E-22	1	1.17E-20	1	-13776.97256	-13776.97259	-13601.35099	-13604.4306	-2.40E-05	3.079615	1	0.01307281	1	0.025257177
57	KRT39	-18244.98851	-18232.79161	-18232.79161	12.196901	0	7.85E-07	1	2.40E-06	1	-14721.1367	-14707.09155	-14683.07792	-14696.35644	14.045151	13.278519	1.16E-07	2.56E-07	5.91E-07	1.76E-06
58	KRT4	-15892.33427	-15883.76115	-15883.76115	8.573123	0	3.46E-05	1	8.40E-05	1	-12576.26918	-12576.26918	-12462.33699	-12462.91144	0	0.574452	1	0.283778698	1	0.44466111
59	KRT40	-14820.12618	-14808.2981	-14808.2981	11.828076	0	1.15E-06	1	3.37E-06	1	-11798.54461	-11795.14962	-11753.2906	-11757.42501	3.394988	4.134407	0.009167114	0.004033184	0.019202692	0.009018019
60	KRT5	-16674.68155	-16639.30996	-16639.30996	35.371591	0	4.07E-17	1	3.68E-16	1	-12627.73386	-12627.73393	-12501.64262	-12501.64262	-6.50E-05	0	1	1	1	1
61	KRT6A	-15454.78314	-15441.2108	-15441.2108	13.572341	0	1.89E-07	1	6.48E-07	1	-12797.59377	-12797.59377	-12690.08235	-12696.41613	0	6.333781	1	0.000372054	1	0.00101423
62	KRT6B	-21920.30314	-21910.90694	-21910.90694	9.396207	0	1.46E-05	1	3.77E-05	1	-16441.98518	-16441.98518	-16354.54979	-16362.22301	0	7.673216	1	8.95E-05	1	0.000278257
63	KRT6C	-18156.94857	-18101.98141	-18101.98141	54.967158	0	1.01E-25	1	2.88E-24	1	-13275.011	-13270.28776	-13181.11062	-13186.22123	4.723234	5.11061	0.002115561	0.00138834	0.004730299	0.003453495
64	KRT7	-16856.30216	-16854.85595	-16854.85595	1.446213	0	0.088996821	1	0.122160934	1	-13054.05227	-13052.83491	-12874.51654	-12877.28606	1.21736	2.769516	0.118675084	0.018596867	0.229284871	0.034912985
65	KRT71	-13187.89787	-13166.69459	-13166.69459	21.203281	0	7.41E-11	1	3.60E-10	1	-10557.61324	-10557.61331	-10452.96212	-10452.96212	-6.40E-05	0	1	1	1	1
66	KRT72	-18342.6354	-18311.65555	-18311.65555	30.979844	0	3.51E-15	1	2.91E-14	1	-13604.18868	-13604.18877	-13396.34404	-13396.34404	-8.50E-05	0	1	1	1	1
67	KRT73	-16239.09644	-16188.1245	-16188.1245	50.971942	0	5.71E-24	1	1.03E-22	1	-12649.99205	-12649.99205	-12548.75431	-12548.79563	0	0.041322	1	0.773745813	1	1
68	KRT74	-19003.00081	-18980.78187	-18980.78187	22.218933	0	2.63E-11	1	1.37E-10	1	-14623.82458	-14623.64241	-14526.82529	-14526.83538	0.182171	0.010092	0.546104633	0.887024394	1	1
69	KRT75	-18163.72049	-18121.41729	-18121.41729	42.3032	0	3.64E-20	1	4.26E-19	1	-13866.19705	-13866.19705	-13710.92247	-13710.98866	-1.00E-06	0.066195	1	0.715966763	1	1
70	KRT76	-21460.49749	-21459.14524	-21459.14524	1.352256	-7.00E-06	0.100064697	1	0.136389553	1	-17530.75446	-17522.27935	-17451.80959	-17454.96765	8.475112	3.158054	3.84E-05	0.011964596	0.000121209	0.023573807
71	KRT77	-20705.53971	-20655.11786	-20655.11786	50.421851	0	9.95E-24	1	1.52E-22	1	-16641.63969	-16641.63969	-16543.59972	-16549.00413	0	5.404413	1	0.001010173	1	0.002544614
72	KRT78	-19401.59644	-19399.72186	-19399.72186	1.874585	0	0.052833741	1	0.079822521	1	-15516.25784	-15516.25795	-15403.7602	-15405.84087	-0.000113	2.080669	1	0.041356722	1	0.073482033
73	KRT79	-17030.59601	-17008.72801	-17008.72801	21.867998	0	3.76E-11	1	1.87E-10	1	-13638.09341	-13631.8374	-13530.88562	-13531.04346	6.256013	0.157834	0.000404341	0.574222723	0.000993381	0.846446829
74	KRT8	-15242.12863	-15240.1934	-15240.1934	1.935224	0	0.049143402	1	0.075227208	1	-12283.75379	-12283.75379	-12084.92963	-12084.92963	0	0	1	1	1	1
75	KRT80	-13460.94348	-13438.18991	-13438.18991	22.75357	0	1.52E-11	1	8.65E-11	1	-10621.80255	-10621.80256	-10510.23984	-10510.23984	-2.00E-06	0	1	1	1	1
76	KRT81	-15480.16826	-15457.52816	-15457.52816	22.640106	0	1.71E-11	1	9.44E-11	1	-11797.11804	-11797.11804	-11625.76747	-11625.76747	0	0	1	1	1	1
77	KRT82	-15975.94503	-15963.87757	-15963.87757	12.067455	0	8.98E-07	1	2.67E-06	1	-13042.07323	-13042.07352	-12863.9966	-12863.9966	-0.000289	0	1	1	1	1
78	KRT83	-13526.5904	-13497.85983	-13497.85983	28.730567	0	3.45E-14	1	2.71E-13	1	-10173.24972	-10173.24972	-9986.162262	-9986.162262	0	0	1	1	1	1
79	KRT84	-19416.56768	-19393.50711	-19393.50711	23.060567	1.00E-06	1.11E-11	0.998871621	6.51E-11	1	-15337.11786	-15334.73553	-15233.46533	-15234.4154	2.382339	0.950071	0.029049493	0.168062426	0.058392415	0.278703522
80	KRT85	-13361.62719	-13356.50613	-13356.50613	5.121061	0	0.001372696	1	0.002678103	1	-10546.88192	-10546.36871	-10437.10243	-10437.10243	0.513213	0	0.310999578	1	0.583857699	1
81	KRT86	-13025.39025	-13006.10878	-13006.10878	19.281471	0	5.30E-10	1	2.40E-09	1	-9861.184985	-9861.184985	-9728.149045	-9728.149045	0	0	1	1	1	1
82	KRT9	-18463.09044	-18453.31617	-18452.88145	9.774272	0.434716	9.81E-06	0.351112603	2.57E-05	1	-16758.07198	-16714.56593	-16702.17807	-16748.87222	43.506043	46.694143	1.08E-20	4.30E-22	1.95E-19	1.71E-20
84	KRTAP1-3	-5194.460164	-5192.206972	-5192.194604	2.253192	0.012368	0.033768558	0.875026683	0.053511377	1	-4176.469195	-4168.963008	-4146.439419	-4155.735759	7.506187	9.29634	0.000106809	1.62E-05	0.000295207	6.49E-05
85	KRTAP1-4	-3913.890792	-3913.360789	-3913.360789	0.530003	0	0.303213816	1	0.37477981	1	-3139.508673	-3127.063787	-3122.456663	-3131.896651	12.444886	9.439988	6.07E-07	1.39E-05	2.88E-06	5.90E-05
86	KRTAP1-5	-5366.708897	-5364.14625	-5363.654802	2.562647	0.491448	0.023579576	0.321484875	0.038779633	1	-4150.81912	-4141.769721	-4140.554319	-4145.240184	9.049399	4.685865	2.10E-05	0.002203575	6.73E-05	0.005104469
87	KRTAP10-1	-8846.14212	-8845.887113	-8845.886907	0.255007	0.000206	0.475132796	0.983805824	0.556184861	1	-6251.172786	-6241.767487	-6233.056998	-6240.036731	9.405299	6.979733	1.44E-05	0.000186795	4.71E-05	0.000523551
88	KRTAP10-10	-8011.080868	-8010.13124	-8010.13124	0.949628	0	0.16816162	1	0.218720015	1	-6394.903846	-6389.138638	-6376.404815	-6381.090818	5.765208	4.686003	0.000684667	0.002203243	0.001584287	0.005104469
89	KRTAP10-11	-7219.416777	-7216.291642	-7216.291642	3.125135	0	0.012417438	1	0.021120257	1	-5434.345259	-5426.494776	-5418.6877	-5426.322758	7.850483	7.635058	7.42E-05	9.32E-05	0.000217104	0.000285271
90	KRTAP10-12	-8008.212545	-8007.952438	-8007.952425	0.260107	1.30E-05	0.47075041	0.995931589	0.555515764	1	-5793.309007	-5781.522373	-5772.732861	-5782.269605	11.786634	9.536744	1.20E-06	1.26E-05	5.09E-06	5.56E-05
92	KRTAP10-3	-8273.308309	-8272.615153	-8272.615153	0.693156	0	0.239028903	1	0.299161961	1	-6054.03601	-6037.833692	-6025.057397	-6031.273571	16.202318	6.216174	1.25E-08	0.000421961	7.12E-08	0.001104872
93	KRTAP10-4	-8940.745932	-8940.286585	-8940.286585	0.459347	0	0.337818119	1	0.409913449	1	-6703.605281	-6686.908576	-6681.69567	-6694.344179	16.696705	12.648509	7.53E-09	4.91E-07	4.68E-08	3.06E-06
95	KRTAP10-6	-9736.75618	-9735.41676	-9735.41676	1.33942	0	0.101689777	1	0.136731525	1	-7626.030646	-7609.63633	-7590.603024	-7604.773448	16.394316	14.170424	1.03E-08	1.02E-07	6.01E-08	7.60E-07
98	KRTAP10-9	-9696.088106	-9692.983037	-9692.983037	3.105069	0	0.012702073	1	0.021421292	1	-7099.246326	-7084.202119	-7068.146071	-7080.369268	15.044207	12.223197	4.13E-08	7.64E-07	2.16E-07	4.22E-06
99	KRTAP11-1	-5385.963875	-5385.268832	-5385.268832	0.695043	0	0.238390577	1	0.299161961	1	-4340.824381	-4340.824405	-4335.50431	-4338.426929	-2.40E-05	2.922619	1	0.015619261	1	0.029886856
100	KRTAP12-1	-3084.893822	-3084.634908	-3084.634908	0.258914	0	0.471769669	1	0.555515764	1	-2487.724284	-2481.878175	-2479.160306	-2482.463846	5.846109	3.30354	0.00062762	0.010157408	0.001486863	0.020635768
101	KRTAP12-2	-4422.048087	-4421.817079	-4421.817079	0.231008	0	0.496683297	1	0.578011556	1	-3413.488413	-3406.154276	-3402.579196	-3410.66745	7.334137	8.088254	0.000128186	5.77E-05	0.000344716	0.000185215
102	KRTAP12-3	-3497.679196	-3488.93831	-3488.934685	8.740886	0.003625	2.90E-05	0.93214458	7.22E-05	1	-2602.924311	-2592.923992	-2582.607073	-2592.270074	10.000319	9.663001	7.74E-06	1.10E-05	2.61E-05	4.98E-05
103	KRTAP12-4	-2762.557079	-2762.55708	-2762.557079	-1.00E-06	1.00E-06	1	0.998871621	1	1	-2330.115261	-2326.330647	-2326.342996	-2330.196177	3.784614	3.853181	0.005937321	0.005502654	0.012842683	0.011649235
104	KRTAP13-1	-8866.64186	-8863.250785	-8863.097511	3.391075	0.153274	0.009207392	0.579806236	0.016214788	1	-6712.175811	-6692.344108	-6691.664147	-6709.762677	19.831703	18.09853	3.02E-10	1.78E-09	2.40E-09	1.69E-08
106	KRTAP13-3	-8011.062495	-8010.602142	-8010.026789	0.460353	0.575353	0.337289668	0.283401408	0.409913449	1	-6084.806752	-6051.923519	-6052.054056	-6081.597593	32.883233	29.543537	5.08E-16	1.51E-14	6.73E-15	3.00E-13
109	KRTAP16-1	-18967.31174	-18950.59527	-18949.91619	16.716465	0.679076	7.38E-09	0.243858013	3.06E-08	1	-15770.44877	-15766.33489	-15732.30045	-15740.96249	4.113884	8.662043	0.004125424	3.15E-05	0.009021531	0.00011456
110	KRTAP17-1	-2704.865912	-2703.362	-2702.747174	1.503912	0.614826	0.082863461	0.267474726	0.117784491	1	-2088.938897	-2078.842888	-2076.773636	-2085.888874	10.096009	9.115238	7.00E-06	1.96E-05	2.45E-05	7.49E-05
119	KRTAP2-1	-3588.115306	-3585.742837	-3585.742837	2.372469	0	0.029384612	1	0.047157564	1	-2850.101579	-2850.101579	-2827.167215	-2827.167215	0	0	1	1	1	1
120	KRTAP2-2	-3383.750734	-3379.681808	-3379.681808	4.068926	0	0.004335061	1	0.007771866	1	-2654.409627	-2654.409627	-2633.571786	-2633.571786	0	0	1	1	1	1
121	KRTAP2-3	-3556.146533	-3553.379456	-3553.379456	2.767077	0	0.018648779	1	0.030925893	1	-2707.074911	-2707.074911	-2679.247879	-2679.904011	0	0.656132	1	0.251985155	1	0.401160366
122	KRTAP2-4	-3384.058036	-3376.489624	-3376.489624	7.568412	0	1.00E-04	1	0.000239744	1	-2556.438974	-2556.438974	-2523.623856	-2523.796428	0	0.172572	1	0.55687495	1	0.827000859
124	KRTAP20-2	-2360.764351	-2360.673594	-2360.311738	0.090757	0.361856	0.670075348	0.394928999	0.738714681	1	-1638.414056	-1620.664758	-1620.256538	-1638.39011	17.749298	18.133572	2.55E-09	1.72E-09	1.75E-08	1.69E-08
125	KRTAP20-3	-2002.315084	-2002.315084	-2002.315084	0	0	1	1	1	1	-1666.936741	-1664.20899	-1664.20899	-1666.937191	2.727751	2.728201	0.019506799	0.019496753	0.040019102	0.036260317
126	KRTAP21-1	-3146.315739	-3146.11322	-3146.101393	0.202519	0.011827	0.524498826	0.877768562	0.606832944	1	-2347.245896	-2344.928159	-2344.681113	-2347.268684	2.317737	2.587571	0.031317492	0.022912299	0.062321809	0.041830711
127	KRTAP21-2	-2832.534024	-2832.534037	-2832.534024	-1.30E-05	1.30E-05	1	0.995931589	1	1	-2020.0853	-2012.422918	-2012.36	-2020.103098	7.662382	7.743098	9.05E-05	8.31E-05	0.000257341	0.000262522
131	KRTAP23-1	-3076.699951	-3076.577519	-3076.57561	0.122432	0.001909	0.620714939	0.950730094	0.693945354	1	-2359.001745	-2348.076629	-2348.371412	-2359.036838	10.925116	10.665426	2.95E-06	3.86E-06	1.09E-05	1.88E-05
134	KRTAP26-1	-9308.544328	-9308.168366	-9308.168366	0.375962	0	0.385867764	1	0.462576416	1	-7522.42458	-7514.836074	-7511.991036	-7518.262771	7.588506	6.271735	9.79E-05	0.000397593	0.000274362	0.001054947
137	KRTAP3-1	-2827.297073	-2825.828398	-2825.828398	1.468675	0	0.086552624	1	0.122155831	1	-2315.95056	-2313.086307	-2300.819971	-2304.074901	2.864253	3.25493	0.016691677	0.010727795	0.034600456	0.021348313
138	KRTAP3-2	-3005.404664	-2986.892817	-2986.892817	18.511847	0	1.17E-09	1	5.05E-09	1	-2189.316693	-2187.610347	-2186.296298	-2188.115293	1.706346	1.818995	0.064696824	0.056475077	0.126222234	0.099456109
139	KRTAP3-3	-2751.49038	-2744.301631	-2744.301631	7.188749	0	0.000149579	1	0.000350191	1	-2091.264269	-2091.264269	-2088.679912	-2089.215079	0	0.535167	1	0.300870015	1	0.467758852
141	KRTAP4-11	-7073.944682	-7073.943895	-7073.943892	0.000787	3.00E-06	0.968353294	0.998045592	1	1	-5537.478927	-5483.221945	-5453.231413	-5473.637294	54.256982	20.405881	2.07E-25	1.68E-10	8.25E-24	2.08E-09
142	KRTAP4-12	-6674.414053	-6674.249727	-6674.249727	0.164326	0	0.566453919	1	0.641002961	1	-5136.97335	-5113.23916	-5085.25581	-5090.098915	23.73419	4.843105	5.59E-12	0.001856561	5.30E-11	0.004451272
145	KRTAP4-4	-4325.757236	-4321.063965	-4321.063965	4.693271	0	0.002185841	1	0.00422313	1	-3120.873609	-3110.530819	-3078.14394	-3078.842916	10.34279	0.698976	5.41E-06	0.237066774	1.96E-05	0.383547057
147	KRTAP4-6	-7156.585094	-7144.463942	-7144.463942	12.121152	0	8.49E-07	1	2.56E-06	1	-5370.067479	-5333.340239	-5292.44246	-5304.716382	36.72724	12.273922	1.03E-17	7.25E-07	1.71E-16	4.12E-06
148	KRTAP4-7	-5899.848337	-5894.421309	-5894.421309	5.427028	0	0.000985796	1	0.00198155	1	-4614.20302	-4526.732776	-4522.242761	-4575.484077	87.470244	53.241316	6.17E-40	5.78E-25	1.23E-37	3.83E-23
149	KRTAP4-8	-6102.987774	-6089.740691	-6089.016735	13.247083	0.723956	2.64E-07	0.228863285	8.92E-07	1	-5083.587733	-5023.259398	-5015.672405	-5042.866528	60.328335	27.194123	4.54E-28	1.65E-13	3.01E-26	2.34E-12
150	KRTAP4-9	-6529.949884	-6527.401519	-6527.401519	2.548365	0	0.023970992	1	0.039100225	1	-4949.651441	-4901.660772	-4889.77332	-4919.701423	47.990669	29.928103	1.16E-22	1.02E-14	2.88E-21	2.26E-13
160	KRTAP7-1	-2672.794845	-2658.24108	-2658.24108	14.553765	0	6.85E-08	1	2.48E-07	1	-2025.824286	-2025.824286	-2015.876838	-2017.172391	0	1.295553	1	0.107465271	1	0.182782811
161	KRTAP8-1	-2160.088787	-2143.819066	-2143.195772	16.269721	0.623294	1.17E-08	0.264205153	4.56E-08	1	-1531.069413	-1531.069413	-1527.565554	-1527.565554	0	0	1	1	1	1
162	KRTAP9-1	-7606.314473	-7601.043137	-7601.043137	5.271336	0	0.001166497	1	0.002298345	1	-6023.19253	-6011.992674	-6005.749207	-6014.768748	11.199856	9.019541	2.21E-06	2.16E-05	8.64E-06	8.13E-05
169	KRTAP9-9	-3724.388104	-3723.909404	-3723.909404	0.4787	0	0.327842816	1	0.402720497	1	-2422.397113	-2410.513915	-2412.987504	-2422.425854	11.883198	9.43835	1.09E-06	1.39E-05	4.81E-06	5.90E-05
170	MOB1B	-3314.209553	-3307.841362	-3307.841362	6.368191	0	0.000358611	1	0.00078725	1	-2791.337131	-2791.336374	-2791.385576	-2791.385576	0.000757	0	0.968962022	1	1	1
171	MYBPC1	-29601.10858	-29572.40517	-29572.40517	28.703411	4.00E-06	3.54E-14	0.997743245	2.71E-13	1	-23450.8021	-23440.73981	-23276.16865	-23285.5749	10.062284	9.406253	7.26E-06	1.44E-05	2.49E-05	5.98E-05
172	MYH1	-41583.89933	-41467.03847	-41467.03847	116.860865	0	9.20E-53	1	6.10E-51	1	-30609.89388	-30609.89443	-30512.68337	-30515.98648	-0.000551	3.303108	1	0.010162338	1	0.020635768
173	MYH13	-47821.41845	-47619.2126	-47619.2126	202.205845	0	6.03E-90	1	6.00E-88	1	-36892.72829	-36892.72829	-36689.87214	-36689.87214	0	0	1	1	1	1
174	MYH4	-43799.04078	-43689.40603	-43689.40612	109.634752	-9.70E-05	1.31E-49	1	6.49E-48	1	-33259.9942	-33260.03196	-33168.2991	-33168.2991	-0.037764	0	1	1	1	1
175	MYO6	-25269.12319	-25264.52289	-25264.52289	4.600306	0	0.002419342	1	0.004629318	1	-20925.32189	-20925.32202	-20861.03369	-20861.03369	-0.000121	0	1	1	1	1
176	PFKL	-17590.1739	-17577.00006	-17577.00006	13.173833	0	2.85E-07	1	9.46E-07	1	-14324.48632	-14324.48632	-14118.96831	-14114.64807	0	-4.320238	1	1	1	1
177	PFN1	-1888.738174	-1883.408255	-1883.374164	5.329919	0.034091	0.00109487	0.794002412	0.002178791	1	-1373.912829	-1373.912829	-1373.140327	-1373.158347	0	0.01802	1	0.849432912	1	1
178	PKP1	-16990.98399	-16970.36985	-16970.36985	20.614139	0	1.35E-10	1	6.42E-10	1	-13043.79498	-13043.79506	-12917.96955	-12917.96955	-7.90E-05	0	1	1	1	1
179	PKP3	-19508.54225	-19504.83757	-19504.83758	3.704675	-9.00E-06	0.006488576	1	0.01152881	1	-15740.77771	-15740.77772	-15614.85329	-15614.85329	-9.00E-06	0	1	1	1	1
180	PLS1	-13247.9882	-13232.89977	-13232.89977	15.088436	0	3.94E-08	1	1.45E-07	1	-10943.69327	-10943.69327	-10912.67702	-10912.67702	0	0	1	1	1	1
181	PORCN	-7695.973474	-7694.100688	-7694.100688	1.872786	0	0.052947602	1	0.079822521	1	-6239.918587	-6239.918893	-6224.41657	-6225.749823	-0.000306	1.333253	1	0.102480782	1	0.175807548
182	PTPRM	-32592.62687	-32547.84478	-32547.84486	44.782095	-8.00E-05	2.97E-21	1	3.69E-20	1	-26052.55017	-26052.55017	-25945.78116	-25945.1936	0	-0.587563	1	1	1	1
183	RBM22	-7582.097864	-7582.096889	-7582.096893	0.000975	-4.00E-06	0.964777819	1	1	1	-6229.56848	-6229.564709	-6226.063771	-6226.063638	0.003771	-0.000133	0.930794965	1	1	1
184	RBM8A	-3705.856166	-3665.022238	-3665.022238	40.833928	0	1.61E-19	1	1.69E-18	1	-2876.294252	-2876.292783	-2876.069954	-2876.069731	0.001469	-0.000223	0.956773175	1	1	1
185	SDHAP1	-2613.392562	-2608.993355	-2608.993355	4.399207	0	0.003014925	1	0.005660096	1	-1890.50149	-1890.50149	-1874.527854	-1874.527114	0	-0.00074	1	1	1	1
186	SLC2A4	-11966.43194	-11947.17652	-11947.17652	19.25542	0	5.45E-10	1	2.41E-09	1	-9853.994965	-9853.994965	-9814.204347	-9814.204347	0	0	1	1	1	1
187	SPTSSA	-1063.408574	-1063.408574	-1063.408574	0	0	1	1	1	1	-815.931862	-815.931862	-818.384659	-818.384659	0	0	1	1	1	1
188	TGM3	-25780.78795	-25727.82509	-25727.82509	52.962854	0	7.66E-25	1	1.69E-23	1	-20955.48553	-20932.4349	-20789.61754	-20802.52418	23.050628	12.906648	1.12E-11	3.76E-07	1.02E-10	2.41E-06
189	TMC1	-15342.18851	-15335.22077	-15335.22077	6.967736	0	0.000189194	1	0.000432754	1	-12601.28624	-12601.28625	-12557.62059	-12557.62059	-6.00E-06	-1.00E-06	1	1	1	1
190	TMEM27	-6333.121005	-6327.16486	-6327.16486	5.956145	0	0.000557648	1	0.001191349	1	-4983.279787	-4983.279787	-4968.330521	-4970.902277	0	2.571756	1	0.023333399	1	0.042212241
191	TPP2	-27227.67032	-27203.51768	-27203.51768	24.152635	0	3.65E-12	1	2.27E-11	1	-22274.21562	-22274.21562	-22176.1778	-22162.38128	0	-13.796521	1	1	1	1
192	TRPV3	-19175.13175	-19148.17228	-19148.17228	26.959464	0	2.09E-13	1	1.48E-12	1	-15149.28495	-15149.28502	-15039.8555	-15029.90748	-7.10E-05	-9.948021	1	1	1	1
193	TSPAN5	-3896.885432	-3895.292898	-3895.292898	1.592534	0	0.074313905	1	0.10639185	1	-3307.216232	-3306.62752	-3306.686248	-3307.274625	0.588712	0.588377	0.277881043	0.278017809	0.526650738	0.439091618
194	TTN	-830667.9395	-828005.3063	-828005.3063	2662.633113	0	0	1	0	1	-672690.2718	-672662.3879	-669858.2322	-669865.644	27.883945	7.411869	8.16E-14	0.00011804	9.02E-13	0.000355909
195	UBL3	-1958.474292	-1957.897672	-1958.217554	0.57662	-0.319882	0.28287193	1	0.351821963	1	-1606.381522	-1606.380393	-1604.70082	-1604.700816	0.001129	-4.00E-06	0.962100052	1	1	1
196	VAMP2	-1754.718513	-1749.235833	-1749.235833	5.48268	0	0.000928309	1	0.001885036	1	-1410.198416	-1410.19738	-1410.316062	-1410.316062	0.001036	0	0.96369345	1	1	1
197	WDR45B	-6412.538172	-6410.345904	-6410.345904	2.192268	0	0.036266362	1	0.05676457	1	-5104.057182	-5104.057182	-5092.118417	-5092.118244	0	-0.000173	1	1	1	1
198	ZDHHC13	-14707.05451	-14703.84982	-14703.84982	3.204685	0	0.011351969	1	0.019474498	1	-11976.11961	-11976.11961	-11933.99962	-11936.6432	0	2.64358	1	0.021483227	1	0.039584836
199	ZEB1	-27989.02948	-27969.50109	-27969.50109	19.528387	1.00E-06	4.12E-10	0.998871621	1.91E-09	1	-21947.58657	-21935.73829	-21850.88976	-21859.03659	11.848284	8.146824	1.13E-06	5.42E-05	4.88E-06	0.000179914
