# Supplementary material for: Complementary evolution of coding and noncoding sequence underlies mammalian hairlessness
Source: eLife. 2022 Nov 7;11:e76911. doi: 10.7554/eLife.76911 (PMC9803358; doi:10.7554/eLife.76911)
Supplement: Figure 1—source data 6. — Pathway enrichment results from coding regions after removing all KRT and KRTAP proteins. [file elife-76911-fig1-data6.xlsx]

## Sheet: Canonical
	stat	pval	p.adj	num.genes
KEGG_GLYCOLYSIS_GLUCONEOGENESIS	0.143822	0.000137518	0.00245402	59
KEGG_CITRATE_CYCLE_TCA_CYCLE	0.223235	2.36371e-05	0.000623921	30
KEGG_PENTOSE_PHOSPHATE_PATHWAY	0.147142	0.00946747	0.0540328	26
KEGG_PENTOSE_AND_GLUCURONATE_INTERCONVERSIONS	0.171714	0.00960872	0.0545931	19
KEGG_FRUCTOSE_AND_MANNOSE_METABOLISM	0.0524717	0.297426	0.499899	33
KEGG_GALACTOSE_METABOLISM	0.0046599	0.93451	0.972105	26
KEGG_ASCORBATE_AND_ALDARATE_METABOLISM	0.218372	0.00183634	0.0167384	17
KEGG_FATTY_ACID_METABOLISM	0.163996	0.000240784	0.00376634	42
KEGG_STEROID_BIOSYNTHESIS	0.0769694	0.286698	0.490873	16
KEGG_PRIMARY_BILE_ACID_BIOSYNTHESIS	0.00751243	0.917181	0.969158	16
KEGG_STEROID_HORMONE_BIOSYNTHESIS	0.00846213	0.846253	0.924805	44
KEGG_OXIDATIVE_PHOSPHORYLATION	0.0328019	0.234514	0.432572	111
KEGG_PURINE_METABOLISM	0.0301313	0.209898	0.404781	147
KEGG_PYRIMIDINE_METABOLISM	-0.0428123	0.168903	0.353196	87
KEGG_ALANINE_ASPARTATE_AND_GLUTAMATE_METABOLISM	0.0971237	0.0615488	0.18392	31
KEGG_GLYCINE_SERINE_AND_THREONINE_METABOLISM	0.0841662	0.105208	0.258005	31
KEGG_CYSTEINE_AND_METHIONINE_METABOLISM	0.0984303	0.0542443	0.168157	32
KEGG_VALINE_LEUCINE_AND_ISOLEUCINE_DEGRADATION	0.196554	6.67356e-06	0.000241583	44
KEGG_VALINE_LEUCINE_AND_ISOLEUCINE_BIOSYNTHESIS	0.0956635	0.272086	0.474839	11
KEGG_LYSINE_DEGRADATION	-0.05377	0.223193	0.42147	43
KEGG_ARGININE_AND_PROLINE_METABOLISM	0.106686	0.00732958	0.0463384	53
KEGG_HISTIDINE_METABOLISM	0.0337529	0.52969	0.730268	29
KEGG_TYROSINE_METABOLISM	0.0025181	0.955574	0.982024	41
KEGG_PHENYLALANINE_METABOLISM	0.0911092	0.193654	0.383405	17
KEGG_TRYPTOPHAN_METABOLISM	0.0662121	0.147913	0.325924	40
KEGG_BETA_ALANINE_METABOLISM	0.106184	0.0849204	0.226514	22
KEGG_TAURINE_AND_HYPOTAURINE_METABOLISM	0.0417339	0.647771	0.818271	10
KEGG_SELENOAMINO_ACID_METABOLISM	0.091548	0.113399	0.273149	25
KEGG_GLUTATHIONE_METABOLISM	0.107657	0.00925616	0.0530659	49
KEGG_STARCH_AND_SUCROSE_METABOLISM	0.120005	0.00721153	0.0461465	42
KEGG_N_GLYCAN_BIOSYNTHESIS	-0.0115706	0.79091	0.894954	44
KEGG_OTHER_GLYCAN_DEGRADATION	-0.178679	0.0133898	0.0681319	16
KEGG_O_GLYCAN_BIOSYNTHESIS	-0.110936	0.0462203	0.149562	27
KEGG_AMINO_SUGAR_AND_NUCLEOTIDE_SUGAR_METABOLISM	0.0127808	0.772175	0.887981	43
KEGG_GLYCOSAMINOGLYCAN_DEGRADATION	-0.0439647	0.485825	0.690067	21
KEGG_GLYCOSAMINOGLYCAN_BIOSYNTHESIS_CHONDROITIN_SULFATE	0.0785348	0.202586	0.394888	22
KEGG_GLYCOSAMINOGLYCAN_BIOSYNTHESIS_KERATAN_SULFATE	-0.0399743	0.592111	0.779839	15
KEGG_GLYCOSAMINOGLYCAN_BIOSYNTHESIS_HEPARAN_SULFATE	0.0751041	0.185377	0.372272	26
KEGG_GLYCEROLIPID_METABOLISM	0.0420734	0.309127	0.509978	49
KEGG_INOSITOL_PHOSPHATE_METABOLISM	-0.017398	0.658947	0.824987	54
KEGG_GLYCOSYLPHOSPHATIDYLINOSITOL_GPI_ANCHOR_BIOSYNTHESIS	-0.146262	0.011431	0.0616299	25
KEGG_GLYCEROPHOSPHOLIPID_METABOLISM	0.0407355	0.223875	0.42147	75
KEGG_ETHER_LIPID_METABOLISM	0.0816182	0.110465	0.267098	32
KEGG_ARACHIDONIC_ACID_METABOLISM	0.124295	0.00132418	0.0135302	56
KEGG_LINOLEIC_ACID_METABOLISM	0.17771	0.00211872	0.0183864	25
KEGG_ALPHA_LINOLENIC_ACID_METABOLISM	0.140036	0.0398147	0.137079	18
KEGG_SPHINGOLIPID_METABOLISM	-0.0554581	0.2314	0.429008	39
KEGG_GLYCOSPHINGOLIPID_BIOSYNTHESIS_LACTO_AND_NEOLACTO_SERIES	-0.157513	0.00547674	0.0373066	26
KEGG_GLYCOSPHINGOLIPID_BIOSYNTHESIS_GLOBO_SERIES	-0.11667	0.145408	0.322148	13
KEGG_GLYCOSPHINGOLIPID_BIOSYNTHESIS_GANGLIO_SERIES	-0.0775168	0.298821	0.500357	15
KEGG_PYRUVATE_METABOLISM	0.148476	0.00156204	0.0149245	38
KEGG_GLYOXYLATE_AND_DICARBOXYLATE_METABOLISM	0.0817433	0.257856	0.455653	16
KEGG_PROPANOATE_METABOLISM	0.153547	0.00312034	0.0241065	31
KEGG_BUTANOATE_METABOLISM	0.188366	0.000146729	0.00258203	34
KEGG_ONE_CARBON_POOL_BY_FOLATE	0.0926741	0.186111	0.372272	17
KEGG_RIBOFLAVIN_METABOLISM	-0.0323415	0.654395	0.822536	16
KEGG_NICOTINATE_AND_NICOTINAMIDE_METABOLISM	0.020244	0.748267	0.873413	21
KEGG_PANTOTHENATE_AND_COA_BIOSYNTHESIS	-0.0215273	0.765721	0.884383	16
KEGG_FOLATE_BIOSYNTHESIS	0.0152456	0.861057	0.934041	11
KEGG_RETINOL_METABOLISM	0.159839	5.8828e-05	0.00122189	53
KEGG_PORPHYRIN_AND_CHLOROPHYLL_METABOLISM	0.114506	0.0229757	0.0961402	33
KEGG_TERPENOID_BACKBONE_BIOSYNTHESIS	0.130773	0.0796427	0.218224	15
KEGG_NITROGEN_METABOLISM	-0.0176978	0.774001	0.888279	22
KEGG_SULFUR_METABOLISM	0.0599671	0.454256	0.655515	13
KEGG_AMINOACYL_TRNA_BIOSYNTHESIS	0.131504	0.0036226	0.0263103	41
KEGG_METABOLISM_OF_XENOBIOTICS_BY_CYTOCHROME_P450	0.202906	1.23957e-07	8.26595e-06	57
KEGG_DRUG_METABOLISM_CYTOCHROME_P450	0.185815	6.79792e-07	3.58874e-05	60
KEGG_DRUG_METABOLISM_OTHER_ENZYMES	0.109435	0.0154753	0.0735177	41
KEGG_BIOSYNTHESIS_OF_UNSATURATED_FATTY_ACIDS	0.167158	0.0080508	0.0490402	21
KEGG_ABC_TRANSPORTERS	0.139982	0.00133866	0.0135687	44
KEGG_RIBOSOME	-0.0379248	0.390267	0.5936	43
KEGG_RNA_DEGRADATION	0.0610974	0.152352	0.333385	46
KEGG_RNA_POLYMERASE	-0.00641518	0.915251	0.969158	23
KEGG_BASAL_TRANSCRIPTION_FACTORS	-0.12043	0.0249351	0.101584	29
KEGG_DNA_REPLICATION	-0.102075	0.0342838	0.125906	36
KEGG_SPLICEOSOME	-0.0618772	0.0480375	0.154085	86
KEGG_PROTEASOME	-0.0684102	0.174314	0.3597	33
KEGG_PROTEIN_EXPORT	-0.169547	0.00871125	0.0515755	20
KEGG_PPAR_SIGNALING_PATHWAY	0.0956591	0.00613248	0.0408939	69
KEGG_BASE_EXCISION_REPAIR	-0.0520107	0.309102	0.509978	32
KEGG_NUCLEOTIDE_EXCISION_REPAIR	-0.104373	0.0209396	0.0907186	41
KEGG_MISMATCH_REPAIR	-0.143219	0.0175114	0.0803873	23
KEGG_HOMOLOGOUS_RECOMBINATION	-0.101596	0.0679182	0.198425	27
KEGG_NON_HOMOLOGOUS_END_JOINING	0.0252428	0.752755	0.8766	13
KEGG_MAPK_SIGNALING_PATHWAY	-0.0122082	0.505554	0.706995	256
KEGG_ERBB_SIGNALING_PATHWAY	-0.0332284	0.291172	0.494249	85
KEGG_CALCIUM_SIGNALING_PATHWAY	0.0460339	0.0391196	0.135793	171
KEGG_CYTOKINE_CYTOKINE_RECEPTOR_INTERACTION	-0.202088	6.0701e-28	1.53816e-25	253
KEGG_CHEMOKINE_SIGNALING_PATHWAY	-0.0609011	0.0057765	0.0389299	175
KEGG_PHOSPHATIDYLINOSITOL_SIGNALING_SYSTEM	-0.0187302	0.581077	0.773346	73
KEGG_NEUROACTIVE_LIGAND_RECEPTOR_INTERACTION	0.0657072	0.000248747	0.00384344	268
KEGG_CELL_CYCLE	-0.177729	6.73163e-11	6.09212e-09	114
KEGG_OOCYTE_MEIOSIS	-0.105371	0.00046612	0.0061393	93
KEGG_P53_SIGNALING_PATHWAY	-0.132139	0.000190753	0.00318005	67
KEGG_UBIQUITIN_MEDIATED_PROTEOLYSIS	-0.128365	2.68762e-06	0.000121615	113
KEGG_SNARE_INTERACTIONS_IN_VESICULAR_TRANSPORT	0.0988093	0.0404627	0.138184	36
KEGG_REGULATION_OF_AUTOPHAGY	0.0960818	0.0688327	0.198658	30
KEGG_LYSOSOME	-0.031501	0.241329	0.442495	117
KEGG_ENDOCYTOSIS	-0.00482215	0.828913	0.913246	171
KEGG_PEROXISOME	0.156225	2.66187e-06	0.000121615	76
KEGG_MTOR_SIGNALING_PATHWAY	-0.066918	0.102268	0.253812	50
KEGG_APOPTOSIS	-0.143418	7.61909e-06	0.000260902	82
KEGG_CARDIAC_MUSCLE_CONTRACTION	-0.00375919	0.914234	0.969158	69
KEGG_VASCULAR_SMOOTH_MUSCLE_CONTRACTION	0.071722	0.01183	0.0632433	104
KEGG_WNT_SIGNALING_PATHWAY	-0.029055	0.244526	0.444333	136
KEGG_DORSO_VENTRAL_AXIS_FORMATION	-0.0271672	0.652233	0.820994	23
KEGG_NOTCH_SIGNALING_PATHWAY	-0.0805757	0.0564089	0.172217	47
KEGG_HEDGEHOG_SIGNALING_PATHWAY	-0.0870097	0.0287469	0.111429	53
KEGG_TGF_BETA_SIGNALING_PATHWAY	-0.0512829	0.118465	0.282135	78
KEGG_AXON_GUIDANCE	0.0383364	0.148794	0.326571	120
KEGG_VEGF_SIGNALING_PATHWAY	-0.00863001	0.804716	0.90226	69
KEGG_FOCAL_ADHESION	0.0240226	0.25705	0.45503	190
KEGG_ECM_RECEPTOR_INTERACTION	0.111527	0.000462934	0.0061393	83
KEGG_CELL_ADHESION_MOLECULES_CAMS	-0.0129213	0.611385	0.794487	131
KEGG_ADHERENS_JUNCTION	-0.0878766	0.0145176	0.0715026	65
KEGG_TIGHT_JUNCTION	0.0556224	0.0346916	0.127035	122
KEGG_GAP_JUNCTION	0.0121501	0.70287	0.854642	83
KEGG_COMPLEMENT_AND_COAGULATION_CASCADES	-0.102923	0.0034175	0.0253214	68
KEGG_ANTIGEN_PROCESSING_AND_PRESENTATION	0.0157701	0.637735	0.814303	75
KEGG_RENIN_ANGIOTENSIN_SYSTEM	-0.0182708	0.794348	0.896206	17
KEGG_TOLL_LIKE_RECEPTOR_SIGNALING_PATHWAY	-0.124637	1.78334e-05	0.000491195	100
KEGG_NOD_LIKE_RECEPTOR_SIGNALING_PATHWAY	-0.116413	0.0017041	0.0156456	61
KEGG_RIG_I_LIKE_RECEPTOR_SIGNALING_PATHWAY	-0.0833974	0.0153762	0.0735177	71
KEGG_CYTOSOLIC_DNA_SENSING_PATHWAY	-0.100035	0.0104368	0.0572445	55
KEGG_JAK_STAT_SIGNALING_PATHWAY	-0.15699	5.58146e-11	5.43978e-09	148
KEGG_HEMATOPOIETIC_CELL_LINEAGE	-0.149493	2.04525e-06	9.96668e-05	85
KEGG_NATURAL_KILLER_CELL_MEDIATED_CYTOTOXICITY	-0.0230458	0.387386	0.589925	119
KEGG_T_CELL_RECEPTOR_SIGNALING_PATHWAY	-0.0681119	0.0179003	0.0807514	102
KEGG_B_CELL_RECEPTOR_SIGNALING_PATHWAY	-0.0738509	0.0330926	0.122598	70
KEGG_FC_EPSILON_RI_SIGNALING_PATHWAY	-0.00480758	0.885859	0.951507	75
KEGG_FC_GAMMA_R_MEDIATED_PHAGOCYTOSIS	0.00145805	0.962208	0.98318	89
KEGG_LEUKOCYTE_TRANSENDOTHELIAL_MIGRATION	0.0411921	0.138989	0.313902	109
KEGG_INTESTINAL_IMMUNE_NETWORK_FOR_IGA_PRODUCTION	-0.135584	0.00149215	0.0144317	46
KEGG_CIRCADIAN_RHYTHM_MAMMAL	-0.00950547	0.905576	0.964921	13
KEGG_LONG_TERM_POTENTIATION	0.0318502	0.394552	0.597647	60
KEGG_NEUROTROPHIN_SIGNALING_PATHWAY	-0.061122	0.0247998	0.101491	114
KEGG_LONG_TERM_DEPRESSION	0.0198694	0.577632	0.771191	66
KEGG_OLFACTORY_TRANSDUCTION	0.270248	9.14161e-70	1.15824e-66	373
KEGG_TASTE_TRANSDUCTION	0.0288685	0.489733	0.693196	48
KEGG_REGULATION_OF_ACTIN_CYTOSKELETON	-0.011499	0.5827	0.774026	195
KEGG_INSULIN_SIGNALING_PATHWAY	-0.00738447	0.773203	0.888167	129
KEGG_GNRH_SIGNALING_PATHWAY	0.0445046	0.139393	0.314189	93
KEGG_PROGESTERONE_MEDIATED_OOCYTE_MATURATION	-0.102894	0.0013228	0.0135302	82
KEGG_MELANOGENESIS	-0.0489262	0.104184	0.256312	93
KEGG_ADIPOCYTOKINE_SIGNALING_PATHWAY	0.00896008	0.800277	0.90018	67
KEGG_TYPE_II_DIABETES_MELLITUS	-0.0175735	0.687185	0.842034	44
KEGG_TYPE_I_DIABETES_MELLITUS	-0.00440363	0.922391	0.969158	41
KEGG_MATURITY_ONSET_DIABETES_OF_THE_YOUNG	0.0550216	0.351183	0.553937	24
KEGG_ALDOSTERONE_REGULATED_SODIUM_REABSORPTION	-0.0931765	0.0443563	0.147119	39
KEGG_VASOPRESSIN_REGULATED_WATER_REABSORPTION	0.0152111	0.749149	0.873413	37
KEGG_PROXIMAL_TUBULE_BICARBONATE_RECLAMATION	-0.0569861	0.377953	0.579041	20
KEGG_ALZHEIMERS_DISEASE	0.0557012	0.0200399	0.0878564	148
KEGG_PARKINSONS_DISEASE	0.020796	0.459195	0.661136	107
KEGG_AMYOTROPHIC_LATERAL_SCLEROSIS_ALS	0.02597	0.521921	0.722704	51
KEGG_HUNTINGTONS_DISEASE	-0.008857	0.702581	0.854642	158
KEGG_PRION_DISEASES	-0.0733135	0.145437	0.322148	33
KEGG_VIBRIO_CHOLERAE_INFECTION	0.0408265	0.323684	0.528688	49
KEGG_EPITHELIAL_CELL_SIGNALING_IN_HELICOBACTER_PYLORI_INFECTION	-0.0368681	0.297888	0.499899	67
KEGG_PATHOGENIC_ESCHERICHIA_COLI_INFECTION	0.0602628	0.1626	0.347655	45
KEGG_LEISHMANIA_INFECTION	-0.0742146	0.0334838	0.123685	69
KEGG_PATHWAYS_IN_CANCER	-0.0697036	2.73757e-05	0.000693567	314
KEGG_COLORECTAL_CANCER	-0.0835986	0.0293683	0.112416	57
KEGG_RENAL_CELL_CARCINOMA	-0.0500129	0.167464	0.351286	64
KEGG_PANCREATIC_CANCER	-0.0853465	0.018491	0.0827848	64
KEGG_ENDOMETRIAL_CANCER	-0.0886381	0.0304411	0.115476	50
KEGG_GLIOMA	-0.0720462	0.05412	0.168157	60
KEGG_PROSTATE_CANCER	-0.126021	6.24771e-05	0.00127675	85
KEGG_THYROID_CANCER	-0.0458215	0.410307	0.615218	27
KEGG_BASAL_CELL_CARCINOMA	-0.082395	0.0349099	0.127466	55
KEGG_MELANOMA	-0.0867054	0.0129883	0.0674432	69
KEGG_BLADDER_CANCER	-0.0886143	0.0528067	0.16602	40
KEGG_CHRONIC_MYELOID_LEUKEMIA	-0.0894774	0.00982699	0.0550217	70
KEGG_ACUTE_MYELOID_LEUKEMIA	-0.0381441	0.328801	0.532726	55
KEGG_SMALL_CELL_LUNG_CANCER	-0.0935079	0.00332855	0.0251028	83
KEGG_NON_SMALL_CELL_LUNG_CANCER	-0.065867	0.101018	0.252227	52
KEGG_ASTHMA	-0.0268024	0.623843	0.80654	28
KEGG_AUTOIMMUNE_THYROID_DISEASE	0.00280776	0.944802	0.975602	51
KEGG_SYSTEMIC_LUPUS_ERYTHEMATOSUS	-0.00728962	0.811722	0.906125	90
KEGG_ALLOGRAFT_REJECTION	-0.0462478	0.337541	0.540351	36
KEGG_GRAFT_VERSUS_HOST_DISEASE	0.00700936	0.886031	0.951507	35
KEGG_PRIMARY_IMMUNODEFICIENCY	-0.143409	0.00336311	0.0251272	35
KEGG_HYPERTROPHIC_CARDIOMYOPATHY_HCM	0.0449317	0.166008	0.350514	80
KEGG_ARRHYTHMOGENIC_RIGHT_VENTRICULAR_CARDIOMYOPATHY_ARVC	0.068337	0.0455462	0.148729	72
KEGG_DILATED_CARDIOMYOPATHY	0.0393417	0.208752	0.403184	86
KEGG_VIRAL_MYOCARDITIS	0.0772949	0.0290781	0.111847	67
BIOCARTA_RELA_PATHWAY	-0.227405	0.00230425	0.0192071	15
BIOCARTA_NO1_PATHWAY	-0.119629	0.0385748	0.13464	25
BIOCARTA_CSK_PATHWAY	-0.0604468	0.32672	0.53071	22
BIOCARTA_SRCRPTP_PATHWAY	-0.228831	0.00861128	0.0515755	11
BIOCARTA_AMI_PATHWAY	-0.074002	0.252234	0.448981	20
BIOCARTA_GRANULOCYTES_PATHWAY	-0.12056	0.132455	0.305462	13
BIOCARTA_LYM_PATHWAY	-0.080046	0.380888	0.581428	10
BIOCARTA_ARAP_PATHWAY	0.0520393	0.47133	0.675024	16
BIOCARTA_AGR_PATHWAY	0.0118449	0.814043	0.907118	33
BIOCARTA_AKAP95_PATHWAY	-0.169314	0.0638136	0.188466	10
BIOCARTA_AKT_PATHWAY	-0.16457	0.00908335	0.0523238	21
BIOCARTA_ALK_PATHWAY	-0.0611005	0.198992	0.390283	37
BIOCARTA_AT1R_PATHWAY	-0.0256175	0.639261	0.814303	28
BIOCARTA_ACE2_PATHWAY	-0.182162	0.0230127	0.0961402	13
BIOCARTA_ASBCELL_PATHWAY	-0.238653	0.00421609	0.0300101	12
BIOCARTA_CHEMICAL_PATHWAY	0.00510296	0.934015	0.972105	22
BIOCARTA_SPPA_PATHWAY	-0.00460199	0.941842	0.974134	21
BIOCARTA_ATM_PATHWAY	-0.14177	0.0282761	0.110668	20
BIOCARTA_AGPCR_PATHWAY	-0.0292738	0.725586	0.864631	12
BIOCARTA_BCELLSURVIVAL_PATHWAY	-0.100567	0.163914	0.349145	16
BIOCARTA_BLYMPHOCYTE_PATHWAY	-0.130881	0.132946	0.305462	11
BIOCARTA_BCR_PATHWAY	-0.059119	0.255128	0.453363	31
BIOCARTA_BIOPEPTIDES_PATHWAY	0.0016023	0.972771	0.98679	38
BIOCARTA_RANKL_PATHWAY	-0.25213	0.00109487	0.0117608	14
BIOCARTA_CDMAC_PATHWAY	-0.0945161	0.220979	0.419761	14
BIOCARTA_CARM_ER_PATHWAY	-0.109526	0.029635	0.113095	33
BIOCARTA_CASPASE_PATHWAY	-0.0808767	0.179718	0.364909	23
BIOCARTA_CBL_PATHWAY	-0.14284	0.0746641	0.209755	13
BIOCARTA_CCR3_PATHWAY	0.0152037	0.809538	0.904541	21
BIOCARTA_CD40_PATHWAY	-0.175168	0.0188852	0.0839563	15
BIOCARTA_MCM_PATHWAY	-0.222405	0.00109533	0.0117608	18
BIOCARTA_G1_PATHWAY	-0.148724	0.00753139	0.0470062	27
BIOCARTA_G2_PATHWAY	-0.230554	0.000131011	0.0023713	23
BIOCARTA_CELL2CELL_PATHWAY	-0.060402	0.45099	0.653956	13
BIOCARTA_LAIR_PATHWAY	-0.195034	0.00539368	0.0371402	17
BIOCARTA_CERAMIDE_PATHWAY	-0.105088	0.0957259	0.243056	21
BIOCARTA_TID_PATHWAY	-0.126846	0.0625961	0.18661	18
BIOCARTA_CLASSIC_PATHWAY	-0.075671	0.345012	0.549647	13
BIOCARTA_COMP_PATHWAY	-0.102335	0.133034	0.305462	18
BIOCARTA_VDR_PATHWAY	-0.0742225	0.373492	0.576528	12
BIOCARTA_HDAC_PATHWAY	-0.108444	0.0661367	0.19397	24
BIOCARTA_GCR_PATHWAY	-0.0294632	0.683404	0.839024	16
BIOCARTA_CTCF_PATHWAY	-0.089521	0.146372	0.3236	22
BIOCARTA_CTL_PATHWAY	-0.103033	0.182132	0.368629	14
BIOCARTA_CXCR4_PATHWAY	-0.0132469	0.826069	0.912493	23
BIOCARTA_CELLCYCLE_PATHWAY	-0.139154	0.0209791	0.0907186	23
BIOCARTA_CFTR_PATHWAY	-0.0231959	0.790006	0.894954	11
BIOCARTA_CYTOKINE_PATHWAY	-0.229457	0.000275253	0.00410288	21
BIOCARTA_INFLAM_PATHWAY	-0.162121	0.00253867	0.020756	29
BIOCARTA_D4GDI_PATHWAY	-0.0824381	0.303594	0.505458	13
BIOCARTA_DC_PATHWAY	-0.241852	8.7082e-05	0.00169743	22
BIOCARTA_P35ALZHEIMERS_PATHWAY	0.00904857	0.921095	0.969158	10
BIOCARTA_RNA_PATHWAY	-0.226605	0.0131145	0.0675452	10
BIOCARTA_MTA3_PATHWAY	0.0205009	0.75719	0.879276	19
BIOCARTA_CALCINEURIN_PATHWAY	-0.0349449	0.63952	0.814303	15
BIOCARTA_EGF_PATHWAY	-0.0567047	0.275049	0.476727	31
BIOCARTA_ETC_PATHWAY	0.110034	0.206499	0.400869	11
BIOCARTA_NDKDYNAMIN_PATHWAY	0.0261471	0.753891	0.877117	12
BIOCARTA_EPO_PATHWAY	-0.0512114	0.439928	0.642152	19
BIOCARTA_ECM_PATHWAY	0.0737286	0.231603	0.429008	22
BIOCARTA_ERK_PATHWAY	-0.103257	0.0686323	0.198532	26
BIOCARTA_ERYTH_PATHWAY	-0.18197	0.0147294	0.0715026	15
BIOCARTA_EPONFKB_PATHWAY	-0.173958	0.04581	0.149206	11
BIOCARTA_EIF_PATHWAY	0.030568	0.713977	0.860009	12
BIOCARTA_EXTRINSIC_PATHWAY	-0.0789972	0.324223	0.528688	13
BIOCARTA_FAS_PATHWAY	-0.0921699	0.080909	0.220455	30
BIOCARTA_FCER1_PATHWAY	-0.0742439	0.134551	0.307274	34
BIOCARTA_FIBRINOLYSIS_PATHWAY	0.143382	0.0855782	0.226836	12
BIOCARTA_FMLP_PATHWAY	-0.0417238	0.414534	0.6179	32
BIOCARTA_FREE_PATHWAY	-0.0404484	0.657919	0.824514	10
BIOCARTA_GATA3_PATHWAY	-0.147912	0.0474258	0.152509	15
BIOCARTA_GLYCOLYSIS_PATHWAY	0.116147	0.203565	0.396186	10
BIOCARTA_SET_PATHWAY	-0.179574	0.0493227	0.157015	10
BIOCARTA_GH_PATHWAY	-0.0277177	0.625004	0.807217	26
BIOCARTA_AHSP_PATHWAY	-0.0281054	0.72579	0.864631	13
BIOCARTA_TCAPOPTOSIS_PATHWAY	-0.171923	0.0598314	0.179211	10
BIOCARTA_HIVNEF_PATHWAY	-0.128732	0.000883241	0.0102667	56
BIOCARTA_MPR_PATHWAY	-0.0496301	0.363827	0.566301	28
BIOCARTA_HCMV_PATHWAY	-0.170279	0.0224736	0.0952307	15
BIOCARTA_P53HYPOXIA_PATHWAY	-0.182839	0.00301173	0.0235547	22
BIOCARTA_HIF_PATHWAY	-0.017668	0.825496	0.912493	13
BIOCARTA_IGF1_PATHWAY	-0.114863	0.068621	0.198532	21
BIOCARTA_IL17_PATHWAY	-0.189345	0.00877044	0.0516844	16
BIOCARTA_IL2_PATHWAY	-0.0995714	0.106195	0.259747	22
BIOCARTA_IL3_PATHWAY	-0.0418257	0.588081	0.777667	14
BIOCARTA_IL4_PATHWAY	-0.206217	0.0179093	0.0807514	11
BIOCARTA_IL5_PATHWAY	-0.182946	0.0452087	0.148392	10
BIOCARTA_IL6_PATHWAY	-0.158127	0.0103001	0.0567399	22
BIOCARTA_IL10_PATHWAY	-0.0737181	0.307543	0.508691	16
BIOCARTA_IL12_PATHWAY	-0.203822	0.000943065	0.0106684	22
BIOCARTA_IL2RB_PATHWAY	-0.120817	0.0110929	0.0600631	37
BIOCARTA_IL22BP_PATHWAY	-0.137721	0.0566099	0.172415	16
BIOCARTA_IL7_PATHWAY	-0.102868	0.142211	0.319338	17
BIOCARTA_GSK3_PATHWAY	-0.137195	0.0155507	0.0735177	26
BIOCARTA_DEATH_PATHWAY	-0.154154	0.00257317	0.0208987	32
BIOCARTA_RACCYCD_PATHWAY	-0.129956	0.0276647	0.110572	24
BIOCARTA_GLEEVEC_PATHWAY	0.00664777	0.91219	0.969158	23
BIOCARTA_INSULIN_PATHWAY	-0.0733268	0.245058	0.444333	21
BIOCARTA_INTEGRIN_PATHWAY	0.0250625	0.613463	0.79637	34
BIOCARTA_INTRINSIC_PATHWAY	-0.103481	0.0860524	0.227142	23
BIOCARTA_KERATINOCYTE_PATHWAY	-0.13372	0.0021835	0.0186882	44
BIOCARTA_TCRA_PATHWAY	0.0305576	0.71407	0.860009	12
BIOCARTA_LECTIN_PATHWAY	-0.116866	0.179696	0.364909	11
BIOCARTA_PYK2_PATHWAY	0.0214088	0.716787	0.860009	24
BIOCARTA_EGFR_SMRTE_PATHWAY	-0.0278317	0.749329	0.873413	11
BIOCARTA_MAPK_PATHWAY	-0.0427084	0.177407	0.361957	84
BIOCARTA_MCALPAIN_PATHWAY	0.00244264	0.968387	0.986088	22
BIOCARTA_PPARA_PATHWAY	0.00305635	0.938197	0.973016	54
BIOCARTA_ETS_PATHWAY	-0.120685	0.0764604	0.212913	18
BIOCARTA_MONOCYTE_PATHWAY	-0.129027	0.157814	0.341796	10
BIOCARTA_MTOR_PATHWAY	-4.90844e-05	0.999409	0.999409	19
BIOCARTA_IGF1R_PATHWAY	-0.0865494	0.170047	0.353196	21
BIOCARTA_PITX2_PATHWAY	-0.13296	0.0851141	0.226554	14
BIOCARTA_NGF_PATHWAY	-0.0906413	0.183328	0.370456	18
BIOCARTA_VIP_PATHWAY	-0.135094	0.0283876	0.110668	22
BIOCARTA_NFAT_PATHWAY	-0.0377268	0.376809	0.577986	46
BIOCARTA_NTHI_PATHWAY	-0.147154	0.0146439	0.0715026	23
BIOCARTA_NFKB_PATHWAY	-0.234335	0.000101378	0.00193214	23
BIOCARTA_NOS1_PATHWAY	0.0297043	0.67172	0.832057	17
BIOCARTA_NO2IL12_PATHWAY	-0.260106	0.000206516	0.00338044	17
BIOCARTA_RARRXR_PATHWAY	-0.00764165	0.924028	0.969158	13
BIOCARTA_NUCLEARRS_PATHWAY	0.165661	0.0319361	0.120068	14
BIOCARTA_ARENRF2_PATHWAY	0.039405	0.666202	0.829424	10
BIOCARTA_P38MAPK_PATHWAY	-0.0120079	0.800713	0.90018	37
BIOCARTA_P53_PATHWAY	-0.146535	0.0425288	0.142974	16
BIOCARTA_PDGF_PATHWAY	-0.047163	0.356367	0.558809	32
BIOCARTA_CCR5_PATHWAY	0.0183165	0.812511	0.906207	14
BIOCARTA_PTDINS_PATHWAY	-0.0354566	0.574056	0.767224	21
BIOCARTA_PLCE_PATHWAY	-0.123718	0.17563	0.360366	10
BIOCARTA_EDG1_PATHWAY	-0.0472623	0.413765	0.617479	25
BIOCARTA_CDK5_PATHWAY	-0.112744	0.217127	0.413469	10
BIOCARTA_MYOSIN_PATHWAY	0.000954083	0.985348	0.99203	31
BIOCARTA_PLATELETAPP_PATHWAY	-0.0751478	0.330494	0.532923	14
BIOCARTA_PS1_PATHWAY	-0.114466	0.138269	0.313126	14
BIOCARTA_PROTEASOME_PATHWAY	0.00104386	0.98744	0.99203	19
BIOCARTA_AKAPCENTROSOME_PATHWAY	-0.130953	0.116376	0.278203	12
BIOCARTA_PTEN_PATHWAY	-0.135103	0.053918	0.168157	17
BIOCARTA_RAC1_PATHWAY	0.0256634	0.670314	0.832057	23
BIOCARTA_RAS_PATHWAY	-0.0538024	0.405174	0.608241	20
BIOCARTA_NKCELLS_PATHWAY	0.0412276	0.534106	0.733961	19
BIOCARTA_RB_PATHWAY	-0.141817	0.0767672	0.213298	13
BIOCARTA_CHREBP2_PATHWAY	0.0336211	0.491776	0.694456	35
BIOCARTA_BAD_PATHWAY	-0.197113	0.00107622	0.0117608	23
BIOCARTA_CK1_PATHWAY	-0.00319828	0.965808	0.985248	15
BIOCARTA_EIF2_PATHWAY	0.0252005	0.77234	0.887981	11
BIOCARTA_EIF4_PATHWAY	-0.0398543	0.527515	0.728857	21
BIOCARTA_STEM_PATHWAY	-0.208891	0.00511377	0.0354052	15
BIOCARTA_PGC1A_PATHWAY	0.022857	0.730317	0.865586	19
BIOCARTA_PML_PATHWAY	-0.27113	0.000109648	0.00204299	17
BIOCARTA_DREAM_PATHWAY	-0.0860407	0.302233	0.503855	12
BIOCARTA_LEPTIN_PATHWAY	0.126443	0.146603	0.3236	11
BIOCARTA_RHO_PATHWAY	0.0839861	0.124362	0.292331	28
BIOCARTA_AKAP13_PATHWAY	-0.118675	0.1939	0.383405	10
BIOCARTA_ATRBRCA_PATHWAY	-0.225498	0.00035053	0.00499013	21
BIOCARTA_CARDIACEGF_PATHWAY	-0.127124	0.0697284	0.200331	17
BIOCARTA_HER2_PATHWAY	-0.0954276	0.130331	0.301331	21
BIOCARTA_ERK5_PATHWAY	-0.0588325	0.430382	0.634063	15
BIOCARTA_MAL_PATHWAY	-0.044345	0.552271	0.748238	15
BIOCARTA_MEF2D_PATHWAY	-0.0521597	0.470304	0.675024	16
BIOCARTA_MITOCHONDRIA_PATHWAY	-0.0561271	0.373587	0.576528	21
BIOCARTA_ACH_PATHWAY	-0.0351072	0.627005	0.807333	16
BIOCARTA_PARKIN_PATHWAY	-0.126425	0.166366	0.350514	10
BIOCARTA_CDC42RAC_PATHWAY	0.034568	0.69147	0.845649	11
BIOCARTA_BARR_MAPK_PATHWAY	-0.0130604	0.880811	0.951396	11
BIOCARTA_TOB1_PATHWAY	-0.131932	0.0466281	0.150325	19
BIOCARTA_BARRESTIN_SRC_PATHWAY	-0.0213522	0.782165	0.892795	14
BIOCARTA_NKT_PATHWAY	-0.247871	3.92425e-06	0.000160388	29
BIOCARTA_IL1R_PATHWAY	-0.163747	0.00114739	0.0121145	33
BIOCARTA_MET_PATHWAY	-0.0319345	0.519807	0.721353	34
BIOCARTA_GPCR_PATHWAY	-0.0822379	0.125703	0.29439	29
BIOCARTA_IGF1MTOR_PATHWAY	-0.035632	0.591016	0.779207	19
BIOCARTA_SODD_PATHWAY	-0.303292	0.000899772	0.0103637	10
BIOCARTA_SHH_PATHWAY	-0.0489436	0.511827	0.711839	15
BIOCARTA_PTC1_PATHWAY	-0.154839	0.0754628	0.21153	11
BIOCARTA_SPRY_PATHWAY	-0.0718658	0.305221	0.506171	17
BIOCARTA_STATHMIN_PATHWAY	-0.0605219	0.374305	0.576528	18
BIOCARTA_HSP27_PATHWAY	-0.107165	0.165221	0.350058	14
BIOCARTA_TCR_PATHWAY	-0.0471217	0.2914	0.494249	42
BIOCARTA_TCYTOTOXIC_PATHWAY	-0.144584	0.0711858	0.203595	13
BIOCARTA_THELPER_PATHWAY	-0.135552	0.0907272	0.234117	13
BIOCARTA_TALL1_PATHWAY	-0.142835	0.064367	0.189658	14
BIOCARTA_TEL_PATHWAY	-0.164781	0.0187272	0.083547	17
BIOCARTA_TGFB_PATHWAY	-0.1799	0.0102695	0.0567399	17
BIOCARTA_TH1TH2_PATHWAY	-0.356359	7.69106e-08	5.41365e-06	19
BIOCARTA_41BB_PATHWAY	-0.116601	0.0962044	0.243782	17
BIOCARTA_CTLA4_PATHWAY	-0.125861	0.0514997	0.162314	20
BIOCARTA_LONGEVITY_PATHWAY	-0.137302	0.0657281	0.193219	15
BIOCARTA_SARS_PATHWAY	0.055844	0.540986	0.740204	10
BIOCARTA_PAR1_PATHWAY	-0.0199619	0.678912	0.836753	36
BIOCARTA_STRESS_PATHWAY	-0.0951767	0.099795	0.250377	25
BIOCARTA_TNFR1_PATHWAY	-0.052703	0.32643	0.53071	29
BIOCARTA_TNFR2_PATHWAY	-0.155498	0.0224514	0.0952307	18
BIOCARTA_TOLL_PATHWAY	-0.141223	0.00299025	0.023532	37
BIOCARTA_TPO_PATHWAY	-0.0215306	0.715246	0.860009	24
BIOCARTA_CREB_PATHWAY	-0.00838051	0.887079	0.951507	24
BIOCARTA_CARM1_PATHWAY	-0.141677	0.103836	0.255954	11
BIOCARTA_TFF_PATHWAY	-0.0705801	0.287141	0.490969	19
BIOCARTA_TRKA_PATHWAY	-0.0333582	0.689175	0.843656	12
BIOCARTA_ARF_PATHWAY	-0.0504687	0.471505	0.675024	17
BIOCARTA_UCALPAIN_PATHWAY	0.131137	0.0694969	0.20012	16
BIOCARTA_VEGF_PATHWAY	-0.000832112	0.98807	0.99203	27
BIOCARTA_VITCB_PATHWAY	-0.0112309	0.897407	0.958697	11
BIOCARTA_WNT_PATHWAY	-0.0794475	0.169488	0.353196	25
BIOCARTA_ACTINY_PATHWAY	0.137112	0.0577133	0.174935	16
ST_INTERFERON_GAMMA_PATHWAY	-0.0856726	0.348319	0.553175	10
ST_WNT_CA2_CYCLIC_GMP_PATHWAY	0.063798	0.32361	0.528688	20
ST_DIFFERENTIATION_PATHWAY_IN_PC12_CELLS	-0.0765429	0.0829236	0.224017	43
ST_TUMOR_NECROSIS_FACTOR_PATHWAY	-0.225452	2.69386e-05	0.000693567	29
SA_B_CELL_RECEPTOR_COMPLEXES	-0.0743669	0.217339	0.413469	23
ST_ERK1_ERK2_MAPK_PATHWAY	-0.0698005	0.193708	0.383405	29
SIG_CD40PATHWAYMAP	-0.0606193	0.228682	0.428345	33
SIG_PIP3_SIGNALING_IN_CARDIAC_MYOCTES	-0.052957	0.153506	0.335331	61
SA_CASPASE_CASCADE	-0.105515	0.11155	0.269207	19
ST_GA12_PATHWAY	0.0495454	0.421473	0.6253	22
ST_G_ALPHA_S_PATHWAY	-0.0550471	0.475952	0.679349	14
ST_G_ALPHA_I_PATHWAY	8.61064e-05	0.998615	0.999404	34
SIG_CHEMOTAXIS	-0.0402631	0.378928	0.579833	40
ST_P38_MAPK_PATHWAY	-0.0742348	0.134599	0.307274	34
SIG_IL4RECEPTOR_IN_B_LYPHOCYTES	-0.0733928	0.195595	0.384838	26
WNT_SIGNALING	-0.0168306	0.588621	0.777667	87
SIG_REGULATION_OF_THE_ACTIN_CYTOSKELETON_BY_RHO_GTPASES	0.016361	0.768768	0.88634	27
ST_GRANULE_CELL_SURVIVAL_PATHWAY	0.0111797	0.846704	0.924805	25
ST_ADRENERGIC	-0.0444858	0.363007	0.56572	35
ST_INTEGRIN_SIGNALING_PATHWAY	-0.00145665	0.964854	0.985068	77
ST_GAQ_PATHWAY	-0.0448307	0.412056	0.616381	28
ST_GA13_PATHWAY	-0.052378	0.27741	0.479508	36
ST_STAT3_PATHWAY	-0.11891	0.172204	0.35709	11
SA_G1_AND_S_PHASES	-0.172144	0.0390124	0.135793	12
SIG_INSULIN_RECEPTOR_PATHWAY_IN_CARDIAC_MYOCYTES	0.00325587	0.940529	0.97357	44
ST_T_CELL_SIGNAL_TRANSDUCTION	-0.0781691	0.0732661	0.207669	44
SIG_PIP3_SIGNALING_IN_B_LYMPHOCYTES	-0.00492385	0.918673	0.969158	36
SIG_BCR_SIGNALING_PATHWAY	-0.03251	0.451266	0.653956	45
ST_B_CELL_ANTIGEN_RECEPTOR	-0.0797343	0.0853178	0.22662	39
ST_INTERLEUKIN_4_PATHWAY	-0.0124719	0.825927	0.912493	26
ST_WNT_BETA_CATENIN_PATHWAY	0.0136561	0.783131	0.893094	34
SA_MMP_CYTOKINE_CONNECTION	-0.250949	0.000769643	0.00911343	15
ST_JNK_MAPK_PATHWAY	-0.0513684	0.267643	0.467729	39
SA_PROGRAMMED_CELL_DEATH	-0.0294757	0.723771	0.864296	12
ST_FAS_SIGNALING_PATHWAY	-0.088042	0.0176517	0.080698	61
ST_MYOCYTE_AD_PATHWAY	0.0188957	0.738979	0.870965	26
SA_PTEN_PATHWAY	-0.0377136	0.601653	0.786682	16
SA_REG_CASCADE_OF_CYCLIN_EXPR	-0.218899	0.00867337	0.0515755	12
SA_TRKA_RECEPTOR	-0.0955601	0.185927	0.372272	16
ST_PHOSPHOINOSITIDE_3_KINASE_PATHWAY	-0.0261018	0.604233	0.787624	33
PID_FANCONI_PATHWAY	-0.223902	2.12391e-07	1.22318e-05	45
PID_SMAD2_3NUCLEAR_PATHWAY	-0.105332	0.00144104	0.0140902	77
PID_FCER1_PATHWAY	-0.0637754	0.0882343	0.231455	60
PID_ENDOTHELIN_PATHWAY	0.01201	0.74818	0.873413	60
PID_BCR_5PATHWAY	-0.0971165	0.00735123	0.0463384	64
PID_PRL_SIGNALING_EVENTS_PATHWAY	-0.110978	0.0859746	0.227142	20
PID_RHOA_PATHWAY	0.0361537	0.418238	0.621958	42
PID_ERBB4_PATHWAY	-0.0762628	0.108898	0.263813	37
PID_AURORA_B_PATHWAY	-0.210531	7.29722e-06	0.000256822	38
PID_LYSOPHOSPHOLIPID_PATHWAY	-0.0570575	0.115294	0.276662	64
PID_INSULIN_PATHWAY	-0.0140766	0.747034	0.873413	44
PID_NOTCH_PATHWAY	-0.086872	0.024832	0.101491	56
PID_INTEGRIN1_PATHWAY	0.0500995	0.160303	0.345414	66
PID_P73PATHWAY	-0.0722786	0.0298317	0.113504	76
PID_P38_MKK3_6PATHWAY	-0.0656503	0.246998	0.444333	26
PID_GMCSF_PATHWAY	-0.0342834	0.496004	0.698263	33
PID_WNT_NONCANONICAL_PATHWAY	0.0866663	0.100753	0.252227	30
PID_NFKAPPAB_ATYPICAL_PATHWAY	-0.13172	0.0682669	0.198532	16
PID_IL4_2PATHWAY	-0.0890798	0.0147056	0.0715026	63
PID_HDAC_CLASSII_PATHWAY	-0.0564574	0.29315	0.495614	29
PID_BETA_CATENIN_DEG_PATHWAY	-0.00194518	0.97786	0.989576	17
PID_HDAC_CLASSIII_PATHWAY	-0.0570309	0.32403	0.528688	25
PID_GLYPICAN_1PATHWAY	-0.0999856	0.0778771	0.214968	26
PID_TCR_PATHWAY	-0.00797223	0.827173	0.912917	63
PID_IL27_PATHWAY	-0.2376	2.79179e-05	0.000693567	26
PID_NFKAPPAB_CANONICAL_PATHWAY	-0.167481	0.00792969	0.0485358	21
PID_E2F_PATHWAY	-0.138461	5.09025e-05	0.00111196	72
PID_ER_NONGENOMIC_PATHWAY	-0.043167	0.357801	0.560364	38
PID_DNA_PK_PATHWAY	-0.12569	0.0920597	0.234688	15
PID_HIF2PATHWAY	-0.114706	0.0227378	0.0960293	33
PID_CD40_PATHWAY	-0.18962	0.000262256	0.0039557	31
PID_ATR_PATHWAY	-0.198519	3.84418e-05	0.000901958	36
PID_INTEGRIN_CS_PATHWAY	-0.00543057	0.923709	0.969158	26
PID_MET_PATHWAY	-0.0205301	0.539881	0.739491	75
PID_PTP1B_PATHWAY	-0.0510922	0.212202	0.407479	50
PID_INTEGRIN3_PATHWAY	-0.0164132	0.71652	0.860009	41
PID_IL12_2PATHWAY	-0.171499	3.16882e-06	0.00013383	62
PID_S1P_S1P3_PATHWAY	-0.091719	0.0993378	0.249879	27
PID_LPA4_PATHWAY	-0.0064931	0.932991	0.972105	14
PID_AR_PATHWAY	-0.0779059	0.0372958	0.132735	60
PID_NFAT_TFPATHWAY	-0.197066	3.06961e-06	0.00013383	47
PID_EPHB_FWD_PATHWAY	-0.0474334	0.325303	0.529767	36
PID_AVB3_OPN_PATHWAY	-0.0440082	0.420686	0.624864	28
PID_S1P_S1P4_PATHWAY	-0.0422247	0.627844	0.807592	11
PID_FRA_PATHWAY	-0.0448923	0.345319	0.549647	37
PID_MYC_ACTIV_PATHWAY	-0.112401	0.00100576	0.0112769	72
PID_ARF6_TRAFFICKING_PATHWAY	0.0199351	0.644134	0.814608	45
PID_RHOA_REG_PATHWAY	-0.0164615	0.709214	0.859869	43
PID_REELIN_PATHWAY	0.0123464	0.821275	0.911968	28
PID_PS1_PATHWAY	-0.0757722	0.0825202	0.223404	44
PID_ILK_PATHWAY	-0.0495861	0.261309	0.460471	43
PID_NECTIN_PATHWAY	0.0404826	0.458862	0.661136	28
PID_P38_ALPHA_BETA_PATHWAY	-0.0621415	0.247241	0.444333	29
PID_WNT_SIGNALING_PATHWAY	-0.0324799	0.552316	0.748238	28
PID_TRAIL_PATHWAY	-0.198018	0.000479708	0.0061393	26
PID_CDC42_PATHWAY	-0.00423289	0.906279	0.964921	65
PID_RET_PATHWAY	-0.0293137	0.548901	0.745399	35
PID_CDC42_REG_PATHWAY	-0.0656577	0.229612	0.428702	28
PID_ATM_PATHWAY	-0.208051	4.72989e-05	0.00105136	32
PID_ARF6_PATHWAY	-0.0297727	0.554374	0.748238	33
PID_LKB1_PATHWAY	-0.0129573	0.771729	0.887981	42
PID_CD8_TCR_PATHWAY	-0.0526401	0.194275	0.383405	51
PID_WNT_CANONICAL_PATHWAY	-0.022491	0.727859	0.865101	20
PID_TCPTP_PATHWAY	-0.11865	0.00789407	0.0485358	42
PID_ANGIOPOIETIN_RECEPTOR_PATHWAY	-0.0117057	0.777203	0.888733	49
PID_FAS_PATHWAY	-0.152665	0.00114543	0.0121145	38
PID_CIRCADIAN_PATHWAY	-0.0346549	0.642302	0.814303	15
PID_TXA2PATHWAY	-0.0667425	0.0904208	0.233802	54
PID_SHP2_PATHWAY	-0.122783	0.00167011	0.0155591	55
PID_HDAC_CLASSI_PATHWAY	-0.0346475	0.35041	0.553937	61
PID_S1P_S1P1_PATHWAY	-0.0742124	0.263059	0.462268	19
PID_TELOMERASE_PATHWAY	-0.148936	5.19831e-05	0.00111631	62
PID_HNF3B_PATHWAY	0.0764834	0.0831628	0.224161	43
PID_NETRIN_PATHWAY	-0.00696138	0.896866	0.958697	29
PID_IL1_PATHWAY	-0.147696	0.0044691	0.0314575	31
PID_NFAT_3PATHWAY	-0.0519217	0.223862	0.42147	46
PID_REG_GR_PATHWAY	-0.0871196	0.00976612	0.0550217	74
PID_CONE_PATHWAY	0.0878003	0.145261	0.322148	23
PID_INTEGRIN_A9B1_PATHWAY	-0.0848283	0.142404	0.319338	25
PID_ERB_GENOMIC_PATHWAY	-0.0187601	0.822026	0.912003	12
PID_MTOR_4PATHWAY	0.0486542	0.200939	0.392281	58
PID_IL2_1PATHWAY	-0.0167864	0.675988	0.835948	52
PID_CXCR4_PATHWAY	-0.0297048	0.31628	0.520397	96
PID_IGF1_PATHWAY	0.000910482	0.986947	0.99203	27
PID_ERBB1_RECEPTOR_PROXIMAL_PATHWAY	-0.0155271	0.757829	0.879276	33
PID_TNF_PATHWAY	-0.0965569	0.0252622	0.102587	45
PID_PLK1_PATHWAY	-0.238059	1.96792e-07	1.18731e-05	40
PID_TCR_RAS_PATHWAY	-0.00503686	0.951842	0.981103	12
PID_IL5_PATHWAY	-0.0510084	0.508915	0.709984	14
PID_FOXO_PATHWAY	-0.1002	0.0232139	0.0964327	43
PID_VEGF_VEGFR_PATHWAY	-0.118221	0.195608	0.384838	10
PID_THROMBIN_PAR4_PATHWAY	-0.00303946	0.969744	0.986088	13
PID_MYC_PATHWAY	-0.0783201	0.184484	0.371609	24
PID_PI3KCI_PATHWAY	-0.055751	0.206604	0.400869	43
PID_AJDISS_2PATHWAY	-0.0298223	0.489548	0.693196	45
PID_IL2_PI3K_PATHWAY	-0.0971024	0.0503345	0.159037	34
PID_CERAMIDE_PATHWAY	-0.0810324	0.0550254	0.169412	47
PID_P53_DOWNSTREAM_PATHWAY	-0.0592252	0.0189608	0.0839978	133
PID_AR_TF_PATHWAY	-0.0567465	0.161724	0.347296	51
PID_P75_NTR_PATHWAY	-0.0361344	0.314878	0.518791	65
PID_S1P_META_PATHWAY	-0.0723703	0.251268	0.44839	21
PID_ECADHERIN_NASCENT_AJ_PATHWAY	0.00521158	0.918823	0.969158	32
PID_INTEGRIN4_PATHWAY	0.227634	0.00896543	0.0521064	11
PID_AMB2_NEUTROPHILS_PATHWAY	-0.0375844	0.423341	0.626603	38
PID_AVB3_INTEGRIN_PATHWAY	0.044861	0.186283	0.372272	73
PID_IFNG_PATHWAY	-0.109995	0.0191215	0.0844143	38
PID_RXR_VDR_PATHWAY	0.0502226	0.375822	0.577171	26
PID_LIS1_PATHWAY	0.00518168	0.928601	0.972105	25
PID_ERBB1_DOWNSTREAM_PATHWAY	-0.0459177	0.135646	0.308611	89
PID_SYNDECAN_4_PATHWAY	0.0393223	0.449101	0.653285	31
PID_ATF2_PATHWAY	-0.0803613	0.0396538	0.137079	55
PID_AP1_PATHWAY	-0.075735	0.0324858	0.121057	67
PID_INTEGRIN2_PATHWAY	-0.00768263	0.88625	0.951507	29
PID_UPA_UPAR_PATHWAY	0.0285245	0.523042	0.723465	42
PID_ERBB2_ERBB3_PATHWAY	-0.0560687	0.21482	0.411144	41
PID_FOXM1_PATHWAY	-0.169284	0.000259107	0.00395528	39
PID_EPHA_FWDPATHWAY	0.0210268	0.67628	0.835948	33
PID_HIF1A_PATHWAY	-0.126908	0.0889512	0.231976	15
PID_BMP_PATHWAY	-0.0587403	0.193764	0.383405	41
PID_IL3_PATHWAY	-0.0905482	0.133082	0.305462	23
PID_IL6_7_PATHWAY	-0.0850715	0.0462732	0.149562	46
PID_ECADHERIN_KERATINOCYTE_PATHWAY	0.0343689	0.604239	0.787624	19
PID_ALK1_PATHWAY	-0.129156	0.0321535	0.120218	23
PID_PDGFRB_PATHWAY	-0.0210661	0.439177	0.642152	114
PID_TRKR_PATHWAY	-0.0264769	0.490216	0.693196	57
PID_TCR_JNK_PATHWAY	-0.00365709	0.962229	0.98318	14
PID_NEPHRIN_NEPH1_PATHWAY	-0.0451091	0.385228	0.587345	31
PID_CMYB_PATHWAY	-0.0564693	0.0817143	0.222172	80
PID_IL23_PATHWAY	-0.206345	1.43975e-05	0.000427958	37
PID_HIV_NEF_PATHWAY	-0.145835	0.00286328	0.0226736	35
PID_SYNDECAN_1_PATHWAY	0.106481	0.0136122	0.0689868	45
PID_P38_MK2_PATHWAY	-0.0245183	0.734325	0.8684	16
PID_ERA_GENOMIC_PATHWAY	-0.0177332	0.63548	0.814303	60
PID_ERBB_NETWORK_PATHWAY	-0.115407	0.121908	0.288167	15
PID_ALK2_PATHWAY	-0.0299466	0.743044	0.873413	10
PID_RHODOPSIN_PATHWAY	0.129477	0.0282438	0.110668	24
PID_PDGFRA_PATHWAY	-0.0731067	0.235564	0.433585	22
PID_RETINOIC_ACID_PATHWAY	-0.038942	0.476134	0.679349	28
PID_P38_GAMMA_DELTA_PATHWAY	0.10747	0.21727	0.413469	11
PID_IL8_CXCR2_PATHWAY	-0.054913	0.290502	0.494049	31
PID_HEDGEHOG_2PATHWAY	-0.119248	0.0530163	0.166266	22
PID_INTEGRIN5_PATHWAY	0.0102853	0.883337	0.951507	17
PID_AR_NONGENOMIC_PATHWAY	-0.0456924	0.411627	0.616381	27
PID_ERBB1_INTERNALIZATION_PATHWAY	-0.0477929	0.328434	0.532726	35
PID_HEDGEHOG_GLI_PATHWAY	-0.0790508	0.0700833	0.200895	44
PID_CASPASE_PATHWAY	-0.0502028	0.224911	0.422794	49
PID_CXCR3_PATHWAY	-0.139716	0.00226391	0.0189958	40
PID_BETA_CATENIN_NUC_PATHWAY	-0.0686317	0.0446223	0.147171	72
PID_VEGFR1_PATHWAY	-0.0979144	0.0904193	0.233802	25
PID_SMAD2_3PATHWAY	-0.168503	0.0354851	0.128456	13
PID_P38_ALPHA_BETA_DOWNSTREAM_PATHWAY	-0.0135095	0.788492	0.894954	33
PID_KIT_PATHWAY	-0.0568219	0.157146	0.340931	52
PID_ECADHERIN_STABILIZATION_PATHWAY	0.0125456	0.786599	0.894954	39
PID_EPO_PATHWAY	-0.0341891	0.49719	0.699157	33
PID_IL2_STAT5_PATHWAY	-0.154811	0.00337144	0.0251272	30
PID_TCR_CALCIUM_PATHWAY	-0.183562	0.00120826	0.0125481	26
PID_DELTA_NP63_PATHWAY	-0.0275111	0.528439	0.729338	44
PID_VEGFR1_2_PATHWAY	-0.00361659	0.920486	0.969158	64
PID_THROMBIN_PAR1_PATHWAY	0.00253634	0.955253	0.982024	41
PID_A6B1_A6B4_INTEGRIN_PATHWAY	0.0180687	0.685802	0.841154	42
PID_SYNDECAN_2_PATHWAY	-0.077261	0.143439	0.320601	30
PID_RAC1_REG_PATHWAY	0.0353638	0.451249	0.653956	38
PID_AURORA_A_PATHWAY	-0.22015	4.14601e-05	0.000955089	29
PID_ARF_3PATHWAY	0.0316531	0.651563	0.820994	17
PID_INSULIN_GLUCOSE_PATHWAY	0.00471748	0.940385	0.97357	21
PID_PI3KCI_AKT_PATHWAY	-0.0466456	0.369249	0.571929	31
PID_SYNDECAN_3_PATHWAY	-0.0813979	0.245522	0.444333	17
PID_IL8_CXCR1_PATHWAY	-0.0645935	0.245779	0.444333	27
PID_MYC_REPRESS_PATHWAY	-0.0652866	0.0835074	0.224161	59
PID_HIF1_TFPATHWAY	-0.0606477	0.0993994	0.249879	62
PID_TAP63_PATHWAY	-0.0418367	0.29301	0.495614	53
PID_EPHRINB_REV_PATHWAY	-0.0177956	0.736118	0.8684	30
PID_BARD1_PATHWAY	-0.181695	0.00109529	0.0117608	27
PID_P53_REGULATION_PATHWAY	-0.149943	0.000164075	0.00284771	53
PID_TOLL_ENDOGENOUS_PATHWAY	-0.171587	0.00442203	0.0313001	23
PID_NCADHERIN_PATHWAY	0.0390973	0.4517	0.653956	31
PID_ANTHRAX_PATHWAY	-0.196955	0.00640673	0.0422777	16
PID_S1P_S1P2_PATHWAY	-0.0422344	0.493187	0.69507	22
PID_RAS_PATHWAY	0.0125167	0.815713	0.90818	29
PID_MAPK_TRK_PATHWAY	-0.0429751	0.415744	0.618975	30
PID_PI3K_PLC_TRK_PATHWAY	-0.0193978	0.713367	0.860009	30
PID_CD8_TCR_DOWNSTREAM_PATHWAY	-0.0970666	0.00835793	0.0506674	62
PID_EPHA2_FWD_PATHWAY	-0.0297498	0.662318	0.825941	18
PID_LYMPH_ANGIOGENESIS_PATHWAY	-0.00335093	0.955671	0.982024	23
PID_ALPHA_SYNUCLEIN_PATHWAY	-0.0252762	0.626584	0.807333	31
PID_FGF_PATHWAY	-0.0308677	0.433582	0.637294	54
PID_INTEGRIN_A4B1_PATHWAY	-0.054431	0.294758	0.497282	31
PID_RAC1_PATHWAY	-0.0140058	0.734936	0.8684	49
PID_RB_1PATHWAY	-0.13327	0.000293601	0.00427578	62
PID_FAK_PATHWAY	-0.00398725	0.91943	0.969158	54
PID_HNF3A_PATHWAY	-0.0718383	0.107735	0.261996	42
PID_TGFBR_PATHWAY	-0.0258421	0.536362	0.736211	48
PID_HES_HEY_PATHWAY	-0.10511	0.0128182	0.066834	47
PID_IL12_STAT4_PATHWAY	-0.143196	0.00510546	0.0354052	32
REACTOME_GLYCOGEN_BREAKDOWN_GLYCOGENOLYSIS	0.198415	0.0132844	0.0681319	13
REACTOME_TRANSLATION	0.00664958	0.825216	0.912493	93
REACTOME_PYRIMIDINE_CATABOLISM	0.0782722	0.368861	0.571929	11
REACTOME_RNA_POL_III_TRANSCRIPTION_INITIATION_FROM_TYPE_2_PROMOTER	-0.0766292	0.235786	0.433585	20
REACTOME_INHIBITION_OF_THE_PROTEOLYTIC_ACTIVITY_OF_APC_C_REQUIRED_FOR_THE_ONSET_OF_ANAPHASE_BY_MITOTIC_SPINDLE_CHECKPOINT_COMPONENTS	-0.161648	0.0210988	0.0909257	17
REACTOME_PYRUVATE_METABOLISM_AND_CITRIC_ACID_TCA_CYCLE	0.155155	0.000697332	0.00841448	40
REACTOME_EXTRINSIC_PATHWAY_FOR_APOPTOSIS	-0.354594	9.64309e-06	0.000321521	13
REACTOME_PTM_GAMMA_CARBOXYLATION_HYPUSINE_FORMATION_AND_ARYLSULFATASE_ACTIVATION	-0.0306807	0.588493	0.777667	26
REACTOME_APOPTOTIC_CLEAVAGE_OF_CELLULAR_PROTEINS	0.0617403	0.188437	0.375983	38
REACTOME_RNA_POL_I_TRANSCRIPTION_TERMINATION	0.00121075	0.985432	0.99203	19
REACTOME_FORMATION_OF_THE_TERNARY_COMPLEX_AND_SUBSEQUENTLY_THE_43S_COMPLEX	0.0365005	0.544854	0.743089	23
REACTOME_ACTIVATION_OF_THE_PRE_REPLICATIVE_COMPLEX	-0.157575	0.0028449	0.0226697	30
REACTOME_PROCESSING_OF_INTRONLESS_PRE_MRNAS	-0.104461	0.230423	0.428702	11
REACTOME_BASE_EXCISION_REPAIR	-0.0632862	0.339874	0.543027	19
REACTOME_BILE_ACID_AND_BILE_SALT_METABOLISM	0.0578053	0.298951	0.500357	27
REACTOME_SYNTHESIS_OF_BILE_ACIDS_AND_BILE_SALTS_VIA_7ALPHA_HYDROXYCHOLESTEROL	0.160834	0.0311097	0.11766	15
REACTOME_RECYCLING_OF_BILE_ACIDS_AND_SALTS	0.079616	0.360697	0.563506	11
REACTOME_SIGNALING_BY_RHO_GTPASES	-0.0303849	0.281718	0.484598	106
REACTOME_SIGNALING_BY_WNT	-0.0924539	0.0269569	0.108427	48
REACTOME_METABOLISM_OF_NON_CODING_RNA	-0.0239964	0.595503	0.781868	41
REACTOME_SYNTHESIS_OF_BILE_ACIDS_AND_BILE_SALTS_VIA_24_HYDROXYCHOLESTEROL	0.000825984	0.992786	0.994355	10
REACTOME_SYNTHESIS_OF_BILE_ACIDS_AND_BILE_SALTS	0.0615519	0.353273	0.556021	19
REACTOME_METABOLISM_OF_STEROID_HORMONES_AND_VITAMINS_A_AND_D	-0.108004	0.0272106	0.109101	35
REACTOME_ANDROGEN_BIOSYNTHESIS	-0.279723	0.00219775	0.0186882	10
REACTOME_SIGNALLING_BY_NGF	-0.0424436	0.0425564	0.142974	195
REACTOME_CTNNB1_PHOSPHORYLATION_CASCADE	-0.148622	0.0542828	0.168157	14
REACTOME_INSULIN_RECEPTOR_RECYCLING	-0.00332753	0.956944	0.982535	22
REACTOME_SIGNALING_BY_SCF_KIT	-0.0634127	0.0635266	0.188466	72
REACTOME_DEVELOPMENTAL_BIOLOGY	-0.00053982	0.972264	0.98679	362
REACTOME_CROSS_PRESENTATION_OF_SOLUBLE_EXOGENOUS_ANTIGENS_ENDOSOMES	-0.0731673	0.124026	0.292219	37
REACTOME_SIGNALING_BY_NODAL	-0.0911509	0.22182	0.420727	15
REACTOME_DAG_AND_IP3_SIGNALING	-0.0789311	0.163963	0.349145	26
REACTOME_TCA_CYCLE_AND_RESPIRATORY_ELECTRON_TRANSPORT	0.0928048	0.000812581	0.00953278	110
REACTOME_BMAL1_CLOCK_NPAS2_ACTIVATES_CIRCADIAN_EXPRESSION	0.000947171	0.984769	0.99203	34
REACTOME_ANTIGEN_PROCESSING_CROSS_PRESENTATION	-0.00106964	0.97757	0.989576	58
REACTOME_GROWTH_HORMONE_RECEPTOR_SIGNALING	-0.037796	0.530673	0.73044	23
REACTOME_TRIF_MEDIATED_TLR3_SIGNALING	-0.121488	0.000662283	0.00806839	66
REACTOME_CELL_CELL_COMMUNICATION	0.0820358	0.00218311	0.0186882	118
REACTOME_ABCA_TRANSPORTERS_IN_LIPID_HOMEOSTASIS	0.144049	0.0461633	0.149562	16
REACTOME_ER_PHAGOSOME_PATHWAY	-0.0156996	0.719041	0.860863	44
REACTOME_MEIOSIS	-0.104343	0.00196915	0.0176944	74
REACTOME_NEGATIVE_REGULATION_OF_FGFR_SIGNALING	-0.0727655	0.15474	0.337446	32
REACTOME_G0_AND_EARLY_G1	-0.102054	0.0977607	0.246739	22
REACTOME_REGULATION_OF_KIT_SIGNALING	-0.163331	0.0237718	0.0982452	16
REACTOME_MEMBRANE_TRAFFICKING	0.0798252	0.00324037	0.0245841	115
REACTOME_NEF_MEDIATES_DOWN_MODULATION_OF_CELL_SURFACE_RECEPTORS_BY_RECRUITING_THEM_TO_CLATHRIN_ADAPTERS	-0.0625901	0.401525	0.603478	15
REACTOME_IMMUNOREGULATORY_INTERACTIONS_BETWEEN_A_LYMPHOID_AND_A_NON_LYMPHOID_CELL	0.0197763	0.606306	0.789506	57
REACTOME_ACTIVATED_AMPK_STIMULATES_FATTY_ACID_OXIDATION_IN_MUSCLE	0.0904099	0.184449	0.371609	18
REACTOME_VITAMIN_B5_PANTOTHENATE_METABOLISM	-0.0812084	0.351172	0.553937	11
REACTOME_BOTULINUM_NEUROTOXICITY	0.177428	0.0140525	0.0703824	16
REACTOME_METABOLISM_OF_VITAMINS_AND_COFACTORS	-0.00588441	0.885752	0.951507	50
REACTOME_TRANS_GOLGI_NETWORK_VESICLE_BUDDING	0.0509738	0.200124	0.391491	53
REACTOME_PROTEOLYTIC_CLEAVAGE_OF_SNARE_COMPLEX_PROTEINS	0.168479	0.0291314	0.111847	14
REACTOME_RESOLUTION_OF_AP_SITES_VIA_THE_MULTIPLE_NUCLEOTIDE_PATCH_REPLACEMENT_PATHWAY	-0.0910105	0.194137	0.383405	17
REACTOME_GAMMA_CARBOXYLATION_TRANSPORT_AND_AMINO_TERMINAL_CLEAVAGE_OF_PROTEINS	-0.0338095	0.7113	0.859939	10
REACTOME_IL_7_SIGNALING	-0.15262	0.0797455	0.218224	11
REACTOME_CELL_CYCLE	-0.1713	2.55041e-27	5.38562e-25	348
REACTOME_SIGNALING_BY_ERBB4	-0.069494	0.0321655	0.120218	80
REACTOME_ORC1_REMOVAL_FROM_CHROMATIN	-0.106811	0.00726111	0.0462303	53
REACTOME_O_LINKED_GLYCOSYLATION_OF_MUCINS	-0.0626205	0.138149	0.313126	47
REACTOME_SULFUR_AMINO_ACID_METABOLISM	0.0902104	0.126377	0.295424	24
REACTOME_ANTIVIRAL_MECHANISM_BY_IFN_STIMULATED_GENES	-0.0578055	0.125431	0.294299	59
REACTOME_PROLACTIN_RECEPTOR_SIGNALING	-0.0739688	0.375127	0.576804	12
REACTOME_SIGNALING_BY_ERBB2	-0.0900425	0.00361614	0.0263103	88
REACTOME_SPHINGOLIPID_DE_NOVO_BIOSYNTHESIS	-0.0446167	0.398159	0.600787	30
REACTOME_TERMINATION_OF_O_GLYCAN_BIOSYNTHESIS	0.0257575	0.721444	0.86233	16
REACTOME_DEFENSINS	-0.193572	2.95122e-05	0.000719077	39
REACTOME_SIGNALING_BY_CONSTITUTIVELY_ACTIVE_EGFR	-0.0926787	0.230087	0.428702	14
REACTOME_GRB2_EVENTS_IN_ERBB2_SIGNALING	-0.0754601	0.243009	0.443997	20
REACTOME_SIGNALING_BY_EGFR_IN_CANCER	-0.0568504	0.0590162	0.177609	93
REACTOME_BETA_DEFENSINS	-0.211721	1.49593e-05	0.000427958	35
REACTOME_SRP_DEPENDENT_COTRANSLATIONAL_PROTEIN_TARGETING_TO_MEMBRANE	-0.0531559	0.155341	0.337595	60
REACTOME_PI3K_EVENTS_IN_ERBB4_SIGNALING	-0.0843384	0.0846069	0.226154	35
REACTOME_SHC1_EVENTS_IN_ERBB4_SIGNALING	-0.0546334	0.422554	0.626171	18
REACTOME_PI3K_EVENTS_IN_ERBB2_SIGNALING	-0.105394	0.0197194	0.0867517	41
REACTOME_NUCLEAR_SIGNALING_BY_ERBB4	-0.0653877	0.17512	0.360366	36
REACTOME_GLYCOSPHINGOLIPID_METABOLISM	-0.00935538	0.84409	0.92434	37
REACTOME_PPARA_ACTIVATES_GENE_EXPRESSION	-0.000432735	0.988115	0.99203	100
REACTOME_ASSOCIATION_OF_LICENSING_FACTORS_WITH_THE_PRE_REPLICATIVE_COMPLEX	-0.275071	0.00158873	0.0149477	11
REACTOME_RIP_MEDIATED_NFKB_ACTIVATION_VIA_DAI	-0.22329	0.00144424	0.0140902	17
REACTOME_PRE_NOTCH_TRANSCRIPTION_AND_TRANSLATION	-0.221732	0.000234883	0.00371996	23
REACTOME_DEGRADATION_OF_THE_EXTRACELLULAR_MATRIX	0.101348	0.0636838	0.188466	28
REACTOME_MITOCHONDRIAL_PROTEIN_IMPORT	0.0519281	0.228879	0.428345	45
REACTOME_SIGNALING_BY_HIPPO	-0.0310966	0.639094	0.814303	19
REACTOME_ACTIVATED_NOTCH1_TRANSMITS_SIGNAL_TO_THE_NUCLEUS	-0.0229537	0.697325	0.84953	24
REACTOME_TRAFFICKING_AND_PROCESSING_OF_ENDOSOMAL_TLR	-0.0589825	0.47943	0.682515	12
REACTOME_SIGNALING_BY_NOTCH4	-0.0794819	0.340583	0.543475	12
REACTOME_DOWNSTREAM_SIGNALING_EVENTS_OF_B_CELL_RECEPTOR_BCR	-0.0858691	0.00985787	0.0550217	76
REACTOME_ACTIVATION_OF_NF_KAPPAB_IN_B_CELLS	-0.10222	0.0155054	0.0735177	47
REACTOME_RORA_ACTIVATES_CIRCADIAN_EXPRESSION	0.0402922	0.513282	0.713079	22
REACTOME_ANTIGEN_ACTIVATES_B_CELL_RECEPTOR_LEADING_TO_GENERATION_OF_SECOND_MESSENGERS	-0.0440764	0.437017	0.640858	26
REACTOME_REGULATION_OF_COMPLEMENT_CASCADE	-0.136647	0.101329	0.252227	12
REACTOME_YAP1_AND_WWTR1_TAZ_STIMULATED_GENE_EXPRESSION	0.0148507	0.805411	0.90226	23
REACTOME_SIGNALING_BY_NOTCH2	-0.114579	0.16949	0.353196	12
REACTOME_PRE_NOTCH_EXPRESSION_AND_PROCESSING	-0.0971352	0.0385257	0.13464	38
REACTOME_SIGNALING_BY_THE_B_CELL_RECEPTOR_BCR	-0.0755323	0.0086492	0.0515755	102
REACTOME_EXTRACELLULAR_MATRIX_ORGANIZATION	0.125197	8.47682e-05	0.00167815	83
REACTOME_NOTCH1_INTRACELLULAR_DOMAIN_REGULATES_TRANSCRIPTION	-0.119634	0.00983281	0.0550217	39
REACTOME_CIRCADIAN_REPRESSION_OF_EXPRESSION_BY_REV_ERBA	0.00555259	0.929857	0.972105	21
REACTOME_PRE_NOTCH_PROCESSING_IN_GOLGI	0.0343148	0.634803	0.814303	16
REACTOME_SIGNALING_BY_NOTCH1	-0.0830684	0.0229108	0.0961402	63
REACTOME_SIGNALING_BY_NOTCH3	-0.115325	0.166732	0.350514	12
REACTOME_TRIGLYCERIDE_BIOSYNTHESIS	0.165647	0.000417625	0.00562905	38
REACTOME_INSULIN_RECEPTOR_SIGNALLING_CASCADE	-0.0189997	0.55564	0.748238	81
REACTOME_ARMS_MEDIATED_ACTIVATION	0.0447949	0.561869	0.753321	14
REACTOME_PROLONGED_ERK_ACTIVATION_EVENTS	0.0268101	0.710563	0.859869	16
REACTOME_SIGNALLING_TO_RAS	0.0517788	0.380296	0.581224	24
REACTOME_SIGNALING_BY_BMP	-0.0602257	0.351442	0.553937	20
REACTOME_CELL_SURFACE_INTERACTIONS_AT_THE_VASCULAR_WALL	-0.0657137	0.0402944	0.137981	82
REACTOME_NGF_SIGNALLING_VIA_TRKA_FROM_THE_PLASMA_MEMBRANE	-0.0365588	0.166819	0.350514	121
REACTOME_SIGNALLING_TO_ERKS	0.0546496	0.285199	0.489167	32
REACTOME_P38MAPK_EVENTS	0.141942	0.10319	0.255356	11
REACTOME_ACYL_CHAIN_REMODELLING_OF_PI	0.110216	0.139612	0.314189	15
REACTOME_TGF_BETA_RECEPTOR_SIGNALING_IN_EMT_EPITHELIAL_TO_MESENCHYMAL_TRANSITION	0.0239287	0.793362	0.895891	10
REACTOME_DOWNREGULATION_OF_TGF_BETA_RECEPTOR_SIGNALING	-0.0891237	0.21734	0.413469	16
REACTOME_COLLAGEN_FORMATION	0.136503	0.000474715	0.0061393	55
REACTOME_SMAD2_SMAD3_SMAD4_HETEROTRIMER_REGULATES_TRANSCRIPTION	-0.223309	0.000400004	0.00556929	21
REACTOME_SIGNALING_BY_FGFR_IN_DISEASE	-0.0526931	0.055089	0.169412	112
REACTOME_HS_GAG_DEGRADATION	-0.0156759	0.808367	0.904541	20
REACTOME_SYNTHESIS_OF_PIPS_AT_THE_EARLY_ENDOSOME_MEMBRANE	-0.078048	0.349366	0.553937	12
REACTOME_SIGNALLING_TO_P38_VIA_RIT_AND_RIN	0.00814823	0.919008	0.969158	13
REACTOME_P53_INDEPENDENT_G1_S_DNA_DAMAGE_CHECKPOINT	-0.102814	0.0330034	0.122598	36
REACTOME_REGULATION_OF_HYPOXIA_INDUCIBLE_FACTOR_HIF_BY_OXYGEN	-0.19697	0.00640255	0.0422777	16
REACTOME_ACYL_CHAIN_REMODELLING_OF_PC	0.073265	0.234551	0.432572	22
REACTOME_SYNTHESIS_OF_PIPS_AT_THE_GOLGI_MEMBRANE	-0.0239705	0.747999	0.873413	15
REACTOME_TGF_BETA_RECEPTOR_SIGNALING_ACTIVATES_SMADS	-0.0734386	0.281011	0.48441	18
REACTOME_ACTIVATED_POINT_MUTANTS_OF_FGFR2	0.00190724	0.978939	0.989876	16
REACTOME_PHOSPHOLIPID_METABOLISM	0.0197231	0.348408	0.553175	193
REACTOME_CS_DS_DEGRADATION	-0.0645266	0.439111	0.642152	12
REACTOME_SYNTHESIS_OF_PA	0.17162	0.00204379	0.0179825	27
REACTOME_SYNTHESIS_OF_PIPS_AT_THE_LATE_ENDOSOME_MEMBRANE	0.0258788	0.776951	0.888733	10
REACTOME_SYNTHESIS_OF_PE	0.0678938	0.435709	0.639679	11
REACTOME_GASTRIN_CREB_SIGNALLING_PATHWAY_VIA_PKC_AND_MAPK	0.0194675	0.358365	0.560554	190
REACTOME_CHONDROITIN_SULFATE_BIOSYNTHESIS	-0.000863886	0.989605	0.992739	19
REACTOME_HYALURONAN_UPTAKE_AND_DEGRADATION	-0.234896	0.0101287	0.0562854	10
REACTOME_SIGNALING_BY_FGFR1_MUTANTS	0.0116066	0.828898	0.913246	29
REACTOME_SYNTHESIS_OF_PIPS_AT_THE_PLASMA_MEMBRANE	-0.0451542	0.3925	0.595566	30
REACTOME_THE_ACTIVATION_OF_ARYLSULFATASES	-0.025733	0.757666	0.879276	12
REACTOME_TRANSCRIPTIONAL_ACTIVITY_OF_SMAD2_SMAD3_SMAD4_HETEROTRIMER	-0.183827	0.000499239	0.00632535	30
REACTOME_HYALURONAN_METABOLISM	-0.176548	0.0222432	0.09521	14
REACTOME_DOWNREGULATION_OF_SMAD2_3_SMAD4_TRANSCRIPTIONAL_ACTIVITY	-0.136881	0.0876079	0.230289	13
REACTOME_KERATAN_SULFATE_BIOSYNTHESIS	-0.0486358	0.391092	0.59414	26
REACTOME_REVERSIBLE_HYDRATION_OF_CARBON_DIOXIDE	-0.00582888	0.944281	0.975602	12
REACTOME_SIGNALING_BY_FGFR1_FUSION_MUTANTS	-0.00154724	0.981879	0.991268	18
REACTOME_ALPHA_LINOLENIC_ACID_ALA_METABOLISM	0.33843	0.000102173	0.00193214	11
REACTOME_SIGNALING_BY_ACTIVATED_POINT_MUTANTS_OF_FGFR1	0.0330604	0.704278	0.855532	11
REACTOME_PI_METABOLISM	-0.0183189	0.671218	0.832057	45
REACTOME_ABACAVIR_TRANSPORT_AND_METABOLISM	0.0373742	0.682441	0.838654	10
REACTOME_CHONDROITIN_SULFATE_DERMATAN_SULFATE_METABOLISM	0.0234178	0.579248	0.771721	47
REACTOME_LATENT_INFECTION_OF_HOMO_SAPIENS_WITH_MYCOBACTERIUM_TUBERCULOSIS	0.0312377	0.547644	0.745062	31
REACTOME_SYNTHESIS_OF_PC	0.00569163	0.933414	0.972105	18
REACTOME_HS_GAG_BIOSYNTHESIS	0.0612315	0.246232	0.444333	30
REACTOME_SIGNALING_BY_FGFR3_MUTANTS	-0.0209881	0.809589	0.904541	11
REACTOME_KERATAN_SULFATE_KERATIN_METABOLISM	-0.0659922	0.211408	0.407072	30
REACTOME_APOPTOSIS_INDUCED_DNA_FRAGMENTATION	0.00646561	0.938206	0.973016	12
REACTOME_KERATAN_SULFATE_DEGRADATION	-0.098306	0.259063	0.457148	11
REACTOME_HEPARAN_SULFATE_HEPARIN_HS_GAG_METABOLISM	0.0178282	0.660212	0.825057	51
REACTOME_GLYCOSAMINOGLYCAN_METABOLISM	-0.00966791	0.72958	0.865586	108
REACTOME_ACYL_CHAIN_REMODELLING_OF_PG	0.157897	0.0288466	0.111429	16
REACTOME_ACYL_CHAIN_REMODELLING_OF_PE	0.0570392	0.365872	0.568785	21
REACTOME_ACYL_CHAIN_REMODELLING_OF_PS	0.142945	0.0553777	0.169888	15
REACTOME_SIGNALING_BY_FGFR_MUTANTS	-0.0214372	0.631243	0.811141	42
REACTOME_MHC_CLASS_II_ANTIGEN_PRESENTATION	0.00581694	0.857684	0.931977	80
REACTOME_GLYCEROPHOSPHOLIPID_BIOSYNTHESIS	0.0774334	0.0156724	0.0738176	82
REACTOME_A_TETRASACCHARIDE_LINKER_SEQUENCE_IS_REQUIRED_FOR_GAG_SYNTHESIS	-0.00869836	0.880436	0.951396	25
REACTOME_CDK_MEDIATED_PHOSPHORYLATION_AND_REMOVAL_OF_CDC6	-0.0800185	0.106792	0.260202	34
REACTOME_PLATELET_ADHESION_TO_EXPOSED_COLLAGEN	-0.0794128	0.361925	0.564727	11
REACTOME_VEGF_LIGAND_RECEPTOR_INTERACTIONS	-0.0976028	0.285315	0.489167	10
REACTOME_ENOS_ACTIVATION_AND_REGULATION	-0.0542146	0.452998	0.654445	16
REACTOME_MICRORNA_MIRNA_BIOGENESIS	-0.181711	0.0369655	0.132278	11
REACTOME_NUCLEAR_EVENTS_KINASE_AND_TRANSCRIPTION_FACTOR_ACTIVATION	-0.0439765	0.485707	0.690067	21
REACTOME_RETROGRADE_NEUROTROPHIN_SIGNALLING	-0.0604687	0.487548	0.691739	11
REACTOME_ERKS_ARE_INACTIVATED	-0.046547	0.610367	0.793979	10
REACTOME_PI3K_AKT_ACTIVATION	-0.0695795	0.160801	0.345899	34
REACTOME_REGULATORY_RNA_PATHWAYS	-0.193661	0.0121485	0.0641339	14
REACTOME_EGFR_DOWNREGULATION	-0.00643006	0.922749	0.969158	19
REACTOME_PROCESSING_OF_CAPPED_INTRON_CONTAINING_PRE_MRNA	-0.0781049	0.00612174	0.0408939	104
REACTOME_TCR_SIGNALING	-0.0246457	0.543366	0.742659	51
REACTOME_REGULATION_OF_PYRUVATE_DEHYDROGENASE_PDH_COMPLEX	0.0220058	0.79189	0.895026	12
REACTOME_DOWNSTREAM_TCR_SIGNALING	-0.033303	0.502076	0.704463	34
REACTOME_BASIGIN_INTERACTIONS	-0.0258829	0.660976	0.825081	24
REACTOME_AKT_PHOSPHORYLATES_TARGETS_IN_THE_CYTOSOL	-0.123582	0.138398	0.313126	12
REACTOME_GAB1_SIGNALOSOME	-0.096627	0.0481731	0.154129	35
REACTOME_SHC1_EVENTS_IN_EGFR_SIGNALING	-0.0402823	0.615183	0.797786	13
REACTOME_ACTIVATION_OF_THE_MRNA_UPON_BINDING_OF_THE_CAP_BINDING_COMPLEX_AND_EIFS_AND_SUBSEQUENT_BINDING_TO_43S	0.026652	0.61971	0.802835	29
REACTOME_PHOSPHORYLATION_OF_CD3_AND_TCR_ZETA_CHAINS	0.0073959	0.918461	0.969158	16
REACTOME_GLUTAMATE_NEUROTRANSMITTER_RELEASE_CYCLE	0.0940013	0.223504	0.42147	14
REACTOME_TRANSLOCATION_OF_ZAP_70_TO_IMMUNOLOGICAL_SYNAPSE	0.0696178	0.367317	0.570332	14
REACTOME_ERK_MAPK_TARGETS	-0.0510936	0.44098	0.642948	19
REACTOME_TIE2_SIGNALING	-0.112053	0.120897	0.286848	16
REACTOME_GENERATION_OF_SECOND_MESSENGER_MOLECULES	0.0329572	0.553718	0.748238	27
REACTOME_GENERIC_TRANSCRIPTION_PATHWAY	-0.124567	1.88606e-13	1.99137e-11	302
REACTOME_RESPONSE_TO_ELEVATED_PLATELET_CYTOSOLIC_CA2_	-0.0154714	0.641938	0.814303	76
REACTOME_TRANSPORT_OF_MATURE_TRANSCRIPT_TO_CYTOPLASM	-0.058958	0.162714	0.347655	47
REACTOME_METABOLISM_OF_AMINO_ACIDS_AND_DERIVATIVES	0.0497532	0.0201726	0.0881334	186
REACTOME_RNA_POL_I_TRANSCRIPTION	-0.00930649	0.823788	0.912493	48
REACTOME_FATTY_ACYL_COA_BIOSYNTHESIS	0.142039	0.0370628	0.132278	18
REACTOME_E2F_ENABLED_INHIBITION_OF_PRE_REPLICATION_COMPLEX_FORMATION	-0.292566	0.00136139	0.0136852	10
REACTOME_BIOLOGICAL_OXIDATIONS	0.118677	4.30604e-06	0.000170492	127
REACTOME_REGULATED_PROTEOLYSIS_OF_P75NTR	-0.193889	0.033796	0.124475	10
REACTOME_TRANSMISSION_ACROSS_CHEMICAL_SYNAPSES	0.0241515	0.281885	0.484598	169
REACTOME_P75NTR_SIGNALS_VIA_NFKB	-0.190937	0.0283745	0.110668	11
REACTOME_CASPASE_MEDIATED_CLEAVAGE_OF_CYTOSKELETAL_PROTEINS	0.148968	0.0740715	0.209017	12
REACTOME_XENOBIOTICS	0.188507	0.0238053	0.0982452	12
REACTOME_INTEGRIN_CELL_SURFACE_INTERACTIONS	0.0193764	0.557784	0.750226	77
REACTOME_REGULATION_OF_ORNITHINE_DECARBOXYLASE_ODC	-0.0799707	0.088461	0.231571	38
REACTOME_CYTOCHROME_P450_ARRANGED_BY_SUBSTRATE_TYPE	0.0718304	0.0889821	0.231976	47
REACTOME_BASE_FREE_SUGAR_PHOSPHATE_REMOVAL_VIA_THE_SINGLE_NUCLEOTIDE_REPLACEMENT_PATHWAY	-0.109701	0.229794	0.428702	10
REACTOME_APOPTOTIC_CLEAVAGE_OF_CELL_ADHESION_PROTEINS	0.224816	0.00702593	0.0453505	12
REACTOME_HDL_MEDIATED_LIPID_TRANSPORT	0.136329	0.0775007	0.214396	14
REACTOME_NRAGE_SIGNALS_DEATH_THROUGH_JNK	-0.0341079	0.439721	0.642152	43
REACTOME_NRIF_SIGNALS_CELL_DEATH_FROM_THE_NUCLEUS	-0.164632	0.0483825	0.15441	12
REACTOME_REGULATION_OF_APOPTOSIS	-0.0139887	0.74856	0.873413	44
REACTOME_RNA_POL_II_TRANSCRIPTION	-0.0777469	0.020266	0.0882371	75
REACTOME_NEURONAL_SYSTEM	0.0478233	0.00859728	0.0515755	260
REACTOME_REGULATION_OF_BETA_CELL_DEVELOPMENT	0.0105075	0.844884	0.924411	29
REACTOME_PHASE1_FUNCTIONALIZATION_OF_COMPOUNDS	0.0818997	0.021718	0.093277	66
REACTOME_RNA_POL_III_TRANSCRIPTION	-0.105607	0.0455106	0.148729	30
REACTOME_CELL_DEATH_SIGNALLING_VIA_NRAGE_NRIF_AND_NADE	-0.0447153	0.252308	0.448981	55
REACTOME_NEUROTRANSMITTER_RELEASE_CYCLE	0.0917905	0.068341	0.198532	33
REACTOME_P75_NTR_RECEPTOR_MEDIATED_SIGNALLING	-0.0491957	0.14452	0.321806	74
REACTOME_AMINO_ACID_TRANSPORT_ACROSS_THE_PLASMA_MEMBRANE	0.00125939	0.98066	0.990826	31
REACTOME_ENDOGENOUS_STEROLS	-0.0627848	0.400062	0.602709	15
REACTOME_REGULATION_OF_GENE_EXPRESSION_IN_BETA_CELLS	0.0122613	0.853298	0.929551	19
REACTOME_GLYCOLYSIS	0.0777725	0.178662	0.363931	25
REACTOME_PROCESSIVE_SYNTHESIS_ON_THE_LAGGING_STRAND	-0.142381	0.0563461	0.172217	15
REACTOME_PEPTIDE_CHAIN_ELONGATION	-0.0308799	0.499789	0.702032	40
REACTOME_COMMON_PATHWAY	-0.0406496	0.598618	0.784332	14
REACTOME_MRNA_CAPPING	-0.0976449	0.105279	0.258005	23
REACTOME_MITOCHONDRIAL_FATTY_ACID_BETA_OXIDATION	0.260887	0.000729265	0.00871678	14
REACTOME_SIGNALING_BY_GPCR	0.116476	3.58505e-29	1.13556e-26	865
REACTOME_PEPTIDE_LIGAND_BINDING_RECEPTORS	-0.00561069	0.797089	0.898498	179
REACTOME_METABOLISM_OF_POLYAMINES	0.0626108	0.401369	0.603478	15
REACTOME_CLASS_A1_RHODOPSIN_LIKE_RECEPTORS	0.0234383	0.175346	0.360366	289
REACTOME_NOTCH_HLH_TRANSCRIPTION_PATHWAY	-0.207671	0.0127729	0.066834	12
REACTOME_INTEGRATION_OF_ENERGY_METABOLISM	-0.00219993	0.938457	0.973016	104
REACTOME_CELL_CYCLE_MITOTIC	-0.169837	5.512e-22	9.97671e-20	278
REACTOME_GLUCONEOGENESIS	0.129338	0.0143134	0.0708401	30
REACTOME_DOPAMINE_NEUROTRANSMITTER_RELEASE_CYCLE	0.110657	0.225757	0.423755	10
REACTOME_OPIOID_SIGNALLING	0.00496255	0.891896	0.955226	63
REACTOME_RECRUITMENT_OF_MITOTIC_CENTROSOME_PROTEINS_AND_COMPLEXES	-0.157859	4.54875e-05	0.00102915	56
REACTOME_MITOCHONDRIAL_TRNA_AMINOACYLATION	-0.00241945	0.969405	0.986088	21
REACTOME_CYTOSOLIC_TRNA_AMINOACYLATION	0.256711	1.36279e-05	0.000421135	24
REACTOME_CA_DEPENDENT_EVENTS	-0.0698286	0.24672	0.444333	23
REACTOME_ADENYLATE_CYCLASE_ACTIVATING_PATHWAY	0.0258539	0.77716	0.888733	10
REACTOME_ADENYLATE_CYCLASE_INHIBITORY_PATHWAY	0.00957237	0.904915	0.964921	13
REACTOME_DARPP_32_EVENTS	-0.00529101	0.938091	0.973016	18
REACTOME_CHEMOKINE_RECEPTORS_BIND_CHEMOKINES	-0.159104	5.43046e-05	0.00114673	54
REACTOME_LOSS_OF_NLP_FROM_MITOTIC_CENTROSOMES	-0.153298	0.000210777	0.00338044	49
REACTOME_NEUROTRANSMITTER_RECEPTOR_BINDING_AND_DOWNSTREAM_TRANSMISSION_IN_THE_POSTSYNAPTIC_CELL	0.00494879	0.851549	0.928497	121
REACTOME_CELL_CYCLE_CHECKPOINTS	-0.150557	2.87838e-07	1.58561e-05	98
REACTOME_DIABETES_PATHWAYS	0.018439	0.476886	0.679656	126
REACTOME_P130CAS_LINKAGE_TO_MAPK_SIGNALING_FOR_INTEGRINS	0.146292	0.0581719	0.175904	14
REACTOME_GLYCOPROTEIN_HORMONES	-0.163721	0.0496381	0.157623	12
REACTOME_PLC_BETA_MEDIATED_EVENTS	-0.0187574	0.697299	0.84953	36
REACTOME_REGULATION_OF_INSULIN_LIKE_GROWTH_FACTOR_IGF_ACTIVITY_BY_INSULIN_LIKE_GROWTH_FACTOR_BINDING_PROTEINS_IGFBPS	0.0124845	0.862803	0.934334	16
REACTOME_GRB2_SOS_PROVIDES_LINKAGE_TO_MAPK_SIGNALING_FOR_INTERGRINS_	0.160379	0.0378184	0.1331	14
REACTOME_PEPTIDE_HORMONE_BIOSYNTHESIS	-0.171275	0.0265609	0.107174	14
REACTOME_G_PROTEIN_ACTIVATION	0.0341596	0.588145	0.777667	21
REACTOME_ACETYLCHOLINE_BINDING_AND_DOWNSTREAM_EVENTS	0.21624	0.00375212	0.027011	15
REACTOME_ABC_FAMILY_PROTEINS_MEDIATED_TRANSPORT	0.157963	0.00200778	0.0179145	32
REACTOME_TRNA_AMINOACYLATION	0.134261	0.0026461	0.0213542	42
REACTOME_OLFACTORY_SIGNALING_PATHWAY	0.288194	2.28845e-67	1.44973e-64	314
REACTOME_STEROID_HORMONES	-0.156192	0.00363401	0.0263103	29
REACTOME_PKA_MEDIATED_PHOSPHORYLATION_OF_CREB	-0.0388723	0.60236	0.786795	15
REACTOME_AMINE_DERIVED_HORMONES	-0.0777156	0.297583	0.499899	15
REACTOME_TRANSMEMBRANE_TRANSPORT_OF_SMALL_MOLECULES	0.0291137	0.0500838	0.158641	397
REACTOME_INTEGRIN_ALPHAIIB_BETA3_SIGNALING	0.0643435	0.256531	0.45503	26
REACTOME_NUCLEAR_RECEPTOR_TRANSCRIPTION_PATHWAY	0.0135003	0.749227	0.873413	47
REACTOME_INSULIN_SYNTHESIS_AND_PROCESSING	0.078253	0.25067	0.44839	18
REACTOME_CYCLIN_E_ASSOCIATED_EVENTS_DURING_G1_S_TRANSITION_	-0.0918533	0.0279654	0.110668	48
REACTOME_HOMOLOGOUS_RECOMBINATION_REPAIR_OF_REPLICATION_INDEPENDENT_DOUBLE_STRAND_BREAKS	-0.120482	0.0953768	0.242655	16
REACTOME_G1_PHASE	-0.128488	0.0167362	0.0780649	29
REACTOME_P53_DEPENDENT_G1_DNA_DAMAGE_RESPONSE	-0.11542	0.0106656	0.058247	41
REACTOME_TRANSCRIPTION_COUPLED_NER_TC_NER	-0.0551033	0.246718	0.444333	37
REACTOME_RNA_POL_II_TRANSCRIPTION_PRE_INITIATION_AND_PROMOTER_OPENING	-0.0622003	0.223842	0.42147	32
REACTOME_GLUCAGON_SIGNALING_IN_METABOLIC_REGULATION	-0.0478986	0.398312	0.600787	26
REACTOME_MRNA_PROCESSING	-0.0655739	0.01208	0.0640391	124
REACTOME_SIGNALING_BY_PDGF	0.0107711	0.696263	0.84953	111
REACTOME_ASSOCIATION_OF_TRIC_CCT_WITH_TARGET_PROTEINS_DURING_BIOSYNTHESIS	0.0150256	0.79104	0.894954	26
REACTOME_PREFOLDIN_MEDIATED_TRANSFER_OF_SUBSTRATE_TO_CCT_TRIC	0.0182638	0.747405	0.873413	26
REACTOME_HORMONE_LIGAND_BINDING_RECEPTORS	-0.0995777	0.27568	0.477168	10
REACTOME_GPVI_MEDIATED_ACTIVATION_CASCADE	-0.0331623	0.543996	0.742719	28
REACTOME_PROTEIN_FOLDING	0.0086194	0.833307	0.915698	50
REACTOME_FORMATION_OF_TUBULIN_FOLDING_INTERMEDIATES_BY_CCT_TRIC	-0.0146437	0.820763	0.911968	20
REACTOME_PEROXISOMAL_LIPID_METABOLISM	0.316811	9.50524e-07	4.81725e-05	20
REACTOME_POST_CHAPERONIN_TUBULIN_FOLDING_PATHWAY	-0.0300663	0.667958	0.830523	17
REACTOME_STRIATED_MUSCLE_CONTRACTION	0.138753	0.0126594	0.0665535	27
REACTOME_METABOLISM_OF_NUCLEOTIDES	0.0715695	0.0433036	0.144383	67
REACTOME_AMINE_LIGAND_BINDING_RECEPTORS	0.140851	0.00306728	0.023842	37
REACTOME_METABOLISM_OF_PROTEINS	-0.0102988	0.509933	0.709984	357
REACTOME_DOWNSTREAM_SIGNAL_TRANSDUCTION	-0.0336429	0.288017	0.491803	84
REACTOME_MUSCLE_CONTRACTION	0.128772	0.00545508	0.0373066	39
REACTOME_SEROTONIN_RECEPTORS	0.168753	0.0430318	0.143856	12
REACTOME_CDC6_ASSOCIATION_WITH_THE_ORC_ORIGIN_COMPLEX	-0.235771	0.00679387	0.0441427	11
REACTOME_M_G1_TRANSITION	-0.12158	0.000656063	0.00806839	66
REACTOME_MRNA_SPLICING	-0.0892278	0.00771746	0.0479315	75
REACTOME_MRNA_SPLICING_MINOR_PATHWAY	-0.109399	0.0759015	0.211822	22
REACTOME_3_UTR_MEDIATED_TRANSLATIONAL_REGULATION	-0.0137793	0.719538	0.860863	57
REACTOME_PROCESSING_OF_CAPPED_INTRONLESS_PRE_MRNA	-0.0742076	0.304342	0.505661	16
REACTOME_PURINE_RIBONUCLEOSIDE_MONOPHOSPHATE_BIOSYNTHESIS	0.142722	0.101312	0.252227	11
REACTOME_G1_S_TRANSITION	-0.116471	0.000129813	0.0023713	91
REACTOME_CITRIC_ACID_CYCLE_TCA_CYCLE	0.247811	0.000186068	0.00314331	19
REACTOME_TRANSCRIPTION	-0.0759148	0.00189759	0.0171732	142
REACTOME_POL_SWITCHING	-0.109994	0.169867	0.353196	13
REACTOME_NUCLEOTIDE_EXCISION_REPAIR	-0.0753508	0.0915833	0.234688	42
REACTOME_AXON_GUIDANCE	0.0224284	0.250571	0.44839	225
REACTOME_ACTIVATION_OF_CHAPERONE_GENES_BY_XBP1S	0.0727753	0.0917355	0.234688	45
REACTOME_REGULATION_OF_INSULIN_SECRETION_BY_GLUCAGON_LIKE_PEPTIDE1	-0.0149825	0.762672	0.881665	34
REACTOME_PERK_REGULATED_GENE_EXPRESSION	0.0273214	0.623476	0.80654	27
REACTOME_G_ALPHA_Q_SIGNALLING_EVENTS	0.0213813	0.336601	0.539996	172
REACTOME_P2Y_RECEPTORS	-0.0215189	0.80487	0.90226	11
REACTOME_TRAFFICKING_OF_AMPA_RECEPTORS	0.0347735	0.547625	0.745062	25
REACTOME_NCAM1_INTERACTIONS	0.0262084	0.571689	0.764868	39
REACTOME_CLASS_C_3_METABOTROPIC_GLUTAMATE_PHEROMONE_RECEPTORS	0.209262	0.00673204	0.0439665	14
REACTOME_REGULATION_OF_INSULIN_SECRETION	-0.0173325	0.59773	0.783979	78
REACTOME_NCAM_SIGNALING_FOR_NEURITE_OUT_GROWTH	0.0656178	0.0769801	0.213422	61
REACTOME_INHIBITION_OF_INSULIN_SECRETION_BY_ADRENALINE_NORADRENALINE	0.0175624	0.791119	0.894954	19
REACTOME_NUCLEOTIDE_LIKE_PURINERGIC_RECEPTORS	0.00613141	0.934504	0.972105	15
REACTOME_ACTIVATION_OF_CHAPERONES_BY_ATF6_ALPHA	-0.080384	0.356083	0.558809	11
REACTOME_TRANSPORT_OF_MATURE_MRNA_DERIVED_FROM_AN_INTRONLESS_TRANSCRIPT	-0.0512031	0.316674	0.520397	32
REACTOME_EICOSANOID_LIGAND_BINDING_RECEPTORS	-0.0037281	0.961496	0.98318	14
REACTOME_ACTIVATION_OF_GENES_BY_ATF4	0.0342816	0.561325	0.753321	24
REACTOME_UNFOLDED_PROTEIN_RESPONSE	0.0530761	0.108373	0.263042	77
REACTOME_CLASS_B_2_SECRETIN_FAMILY_RECEPTORS	-0.0375685	0.243899	0.444333	81
REACTOME_GLUCAGON_TYPE_LIGAND_RECEPTORS	-0.0609078	0.273764	0.476137	27
REACTOME_REGULATION_OF_INSULIN_SECRETION_BY_ACETYLCHOLINE	0.0227425	0.80339	0.90226	10
REACTOME_G_ALPHA1213_SIGNALLING_EVENTS	-0.0374935	0.304514	0.505661	63
REACTOME_FANCONI_ANEMIA_PATHWAY	-0.348185	1.51312e-07	9.58562e-06	19
REACTOME_TRAFFICKING_OF_GLUR2_CONTAINING_AMPA_RECEPTORS	0.0264089	0.741732	0.873397	13
REACTOME_FORMATION_OF_RNA_POL_II_ELONGATION_COMPLEX_	-0.108842	0.0361625	0.130165	31
REACTOME_MRNA_3_END_PROCESSING	-0.0874938	0.130282	0.301331	25
REACTOME_POST_TRANSLATIONAL_MODIFICATION_SYNTHESIS_OF_GPI_ANCHORED_PROTEINS	-0.123977	0.0288012	0.111429	26
REACTOME_CYCLIN_A_B1_ASSOCIATED_EVENTS_DURING_G2_M_TRANSITION	-0.126568	0.0898096	0.233174	15
REACTOME_ELONGATION_ARREST_AND_RECOVERY	-0.1458	0.0278918	0.110668	19
REACTOME_SLC_MEDIATED_TRANSMEMBRANE_TRANSPORT	0.0269428	0.155244	0.337595	239
REACTOME_ADP_SIGNALLING_THROUGH_P2RY1	0.0140054	0.83272	0.915698	19
REACTOME_G_BETA_GAMMA_SIGNALLING_THROUGH_PLC_BETA	0.00268068	0.972308	0.98679	14
REACTOME_CD28_CO_STIMULATION	-0.111271	0.0351042	0.127808	30
REACTOME_GPCR_DOWNSTREAM_SIGNALING	0.131797	2.56531e-33	1.08342e-30	767
REACTOME_SYNTHESIS_SECRETION_AND_DEACYLATION_OF_GHRELIN	-0.242415	0.00169448	0.0156456	14
REACTOME_ADHERENS_JUNCTIONS_INTERACTIONS	0.055574	0.317992	0.521265	27
REACTOME_CRMPS_IN_SEMA3A_SIGNALING	0.0857329	0.266917	0.467729	14
REACTOME_OTHER_SEMAPHORIN_INTERACTIONS	0.0836399	0.262274	0.461529	15
REACTOME_ACTIVATION_OF_RAC	0.163978	0.0407267	0.138712	13
REACTOME_PURINE_SALVAGE	0.166577	0.0376408	0.133061	13
REACTOME_G_ALPHA_I_SIGNALLING_EVENTS	0.023502	0.27501	0.476727	184
REACTOME_SEMA3A_PAK_DEPENDENT_AXON_REPULSION	0.0612429	0.427743	0.631644	14
REACTOME_CD28_DEPENDENT_VAV1_PATHWAY	-0.138244	0.130191	0.301331	10
REACTOME_SEMA4D_IN_SEMAPHORIN_SIGNALING	-0.0804521	0.182014	0.368629	23
REACTOME_SEMAPHORIN_INTERACTIONS	-0.00779234	0.837711	0.919706	58
REACTOME_SEMA4D_INDUCED_CELL_MIGRATION_AND_GROWTH_CONE_COLLAPSE	-0.0184115	0.78695	0.894954	18
REACTOME_SEMA3A_PLEXIN_REPULSION_SIGNALING_BY_INHIBITING_INTEGRIN_ADHESION	0.0831454	0.299464	0.500556	13
REACTOME_LYSOSOME_VESICLE_BIOGENESIS	0.0164594	0.798989	0.899839	20
REACTOME_G_BETA_GAMMA_SIGNALLING_THROUGH_PI3KGAMMA	0.00597138	0.930149	0.972105	18
REACTOME_TRANSPORT_OF_GLUCOSE_AND_OTHER_SUGARS_BILE_SALTS_AND_ORGANIC_ACIDS_METAL_IONS_AND_AMINE_COMPOUNDS	0.036001	0.242026	0.443132	89
REACTOME_SPHINGOLIPID_METABOLISM	-0.0252559	0.475783	0.679349	67
REACTOME_PD1_SIGNALING	-0.0401384	0.555716	0.748238	18
REACTOME_G_ALPHA_S_SIGNALLING_EVENTS	-0.00843154	0.758896	0.87967	112
REACTOME_CELL_CELL_JUNCTION_ORGANIZATION	0.0404769	0.295761	0.498311	56
REACTOME_G_ALPHA_Z_SIGNALLING_EVENTS	0.00233047	0.960406	0.98318	38
REACTOME_FACILITATIVE_NA_INDEPENDENT_GLUCOSE_TRANSPORTERS	0.12177	0.144274	0.321806	12
REACTOME_COSTIMULATION_BY_THE_CD28_FAMILY	-0.100797	0.00705134	0.0453505	60
REACTOME_SIGNALING_BY_ROBO_RECEPTOR	0.14556	0.00890919	0.0520182	27
REACTOME_CD28_DEPENDENT_PI3K_AKT_SIGNALING	-0.0991915	0.115842	0.277452	21
REACTOME_TIGHT_JUNCTION_INTERACTIONS	0.0261454	0.62638	0.807333	29
REACTOME_G_PROTEIN_BETA_GAMMA_SIGNALLING	0.00767591	0.903149	0.964018	21
REACTOME_TRANSPORT_OF_INORGANIC_CATIONS_ANIONS_AND_AMINO_ACIDS_OLIGOPEPTIDES	0.0537374	0.0758684	0.211822	92
REACTOME_GOLGI_ASSOCIATED_VESICLE_BIOGENESIS	0.0590727	0.166407	0.350514	46
REACTOME_CTLA4_INHIBITORY_SIGNALING	-0.193343	0.00277737	0.0222717	20
REACTOME_FORMATION_OF_TRANSCRIPTION_COUPLED_NER_TC_NER_REPAIR_COMPLEX	-0.0698413	0.257144	0.45503	22
REACTOME_AMINO_ACID_AND_OLIGOPEPTIDE_SLC_TRANSPORTERS	-0.0121591	0.768815	0.88634	49
REACTOME_CDT1_ASSOCIATION_WITH_THE_CDC6_ORC_ORIGIN_COMPLEX	-0.1234	0.00572844	0.0388125	42
REACTOME_BRANCHED_CHAIN_AMINO_ACID_CATABOLISM	0.211583	0.00253921	0.020756	17
REACTOME_REPAIR_SYNTHESIS_FOR_GAP_FILLING_BY_DNA_POL_IN_TC_NER	-0.0133812	0.862432	0.934334	14
REACTOME_SYNTHESIS_OF_DNA	-0.100357	0.00224859	0.0189931	78
REACTOME_NA_CL_DEPENDENT_NEUROTRANSMITTER_TRANSPORTERS	0.224332	0.00137176	0.0136852	17
REACTOME_FORMATION_OF_FIBRIN_CLOT_CLOTTING_CASCADE	-0.0751155	0.148206	0.326002	31
REACTOME_DEADENYLATION_OF_MRNA	-0.0250359	0.745786	0.873413	14
REACTOME_SIGNAL_AMPLIFICATION	-0.0267048	0.644229	0.814608	25
REACTOME_ZINC_TRANSPORTERS	-0.0788922	0.290329	0.494049	15
REACTOME_DOUBLE_STRAND_BREAK_REPAIR	-0.104018	0.0914712	0.234688	22
REACTOME_RAS_ACTIVATION_UOPN_CA2_INFUX_THROUGH_NMDA_RECEPTOR	0.00835715	0.913821	0.969158	14
REACTOME_METAL_ION_SLC_TRANSPORTERS	-0.0776725	0.207587	0.402161	22
REACTOME_AUTODEGRADATION_OF_THE_E3_UBIQUITIN_LIGASE_COP1	-0.0924727	0.058639	0.176894	35
REACTOME_SMOOTH_MUSCLE_CONTRACTION	0.0377331	0.601466	0.786682	16
REACTOME_ACTIVATION_OF_NMDA_RECEPTOR_UPON_GLUTAMATE_BINDING_AND_POSTSYNAPTIC_EVENTS	-0.0302984	0.55351	0.748238	32
REACTOME_CREB_PHOSPHORYLATION_THROUGH_THE_ACTIVATION_OF_RAS	-0.0109325	0.859211	0.932837	22
REACTOME_POST_NMDA_RECEPTOR_ACTIVATION_EVENTS	-0.0257487	0.637547	0.814303	28
REACTOME_UNBLOCKING_OF_NMDA_RECEPTOR_GLUTAMATE_BINDING_AND_ACTIVATION	0.0261372	0.726099	0.864631	15
REACTOME_METABOLISM_OF_MRNA	-0.034437	0.164758	0.349865	138
REACTOME_MRNA_DECAY_BY_3_TO_5_EXORIBONUCLEASE	0.11834	0.17427	0.3597	11
REACTOME_BILE_SALT_AND_ORGANIC_ANION_SLC_TRANSPORTERS	0.0514681	0.554599	0.748238	11
REACTOME_DEADENYLATION_DEPENDENT_MRNA_DECAY	0.0213344	0.671819	0.832057	33
REACTOME_CREB_PHOSPHORYLATION_THROUGH_THE_ACTIVATION_OF_CAMKII	0.058131	0.504531	0.70696	11
REACTOME_THROMBOXANE_SIGNALLING_THROUGH_TP_RECEPTOR	-0.0128996	0.853984	0.929551	17
REACTOME_CELL_EXTRACELLULAR_MATRIX_INTERACTIONS	-0.00737631	0.923903	0.969158	14
REACTOME_ADP_SIGNALLING_THROUGH_P2RY12	-0.0351355	0.637695	0.814303	15
REACTOME_CELL_JUNCTION_ORGANIZATION	0.0557039	0.0919804	0.234688	77
REACTOME_AMINE_COMPOUND_SLC_TRANSPORTERS	0.11565	0.0377023	0.133061	27
REACTOME_PYRUVATE_METABOLISM	0.069605	0.306887	0.50827	18
REACTOME_GLUCOSE_TRANSPORT	0.0267389	0.568946	0.762003	38
REACTOME_FRS2_MEDIATED_CASCADE	-0.029802	0.548065	0.745062	34
REACTOME_METABOLISM_OF_RNA	-0.0263543	0.231001	0.429008	176
REACTOME_MITOTIC_G1_G1_S_PHASES	-0.120469	1.0595e-05	0.000344203	113
REACTOME_PI_3K_CASCADE	-0.0713991	0.0727212	0.206587	53
REACTOME_DOWNSTREAM_SIGNALING_OF_ACTIVATED_FGFR	-0.0628131	0.0401147	0.137738	90
REACTOME_REGULATION_OF_MITOTIC_CELL_CYCLE	-0.135381	0.000209266	0.00338044	63
REACTOME_TAK1_ACTIVATES_NFKB_BY_PHOSPHORYLATION_AND_ACTIVATION_OF_IKKS_COMPLEX	-0.181781	0.0031841	0.02445	22
REACTOME_REGULATION_OF_AMPK_ACTIVITY_VIA_LKB1	0.0897761	0.245013	0.444333	14
REACTOME_MITOTIC_M_M_G1_PHASES	-0.195405	2.16965e-16	3.43618e-14	150
REACTOME_MYOGENESIS	-0.0302738	0.593448	0.780788	26
REACTOME_MAP_KINASE_ACTIVATION_IN_TLR_CASCADE	-0.0746006	0.0805331	0.219904	46
REACTOME_PHOSPHOLIPASE_C_MEDIATED_CASCADE	-0.0692754	0.0974082	0.24634	48
REACTOME_ACTIVATION_OF_KAINATE_RECEPTORS_UPON_GLUTAMATE_BINDING	0.023084	0.714405	0.860009	21
REACTOME_MAPK_TARGETS_NUCLEAR_EVENTS_MEDIATED_BY_MAP_KINASES	-0.0473059	0.395311	0.597683	27
REACTOME_SYNTHESIS_AND_INTERCONVERSION_OF_NUCLEOTIDE_DI_AND_TRIPHOSPHATES	-0.0043078	0.952452	0.981103	16
REACTOME_GPCR_LIGAND_BINDING	0.0176177	0.2432	0.443997	384
REACTOME_RNA_POL_I_RNA_POL_III_AND_MITOCHONDRIAL_TRANSCRIPTION	-0.0722568	0.0259126	0.104892	80
REACTOME_JNK_C_JUN_KINASES_PHOSPHORYLATION_AND_ACTIVATION_MEDIATED_BY_ACTIVATED_HUMAN_TAK1	-0.0955601	0.185927	0.372272	16
REACTOME_SHC_MEDIATED_CASCADE	-0.0496063	0.372735	0.576528	27
REACTOME_THROMBIN_SIGNALLING_THROUGH_PROTEINASE_ACTIVATED_RECEPTORS_PARS	-0.0416974	0.470876	0.675024	25
REACTOME_ENERGY_DEPENDENT_REGULATION_OF_MTOR_BY_LKB1_AMPK	0.0373388	0.594235	0.781013	17
REACTOME_MITOTIC_G2_G2_M_PHASES	-0.148865	1.51998e-05	0.000427958	71
REACTOME_REGULATION_OF_RHEB_GTPASE_ACTIVITY_BY_AMPK	0.0411315	0.652519	0.820994	10
REACTOME_ACTIVATED_TAK1_MEDIATES_P38_MAPK_ACTIVATION	-0.0952519	0.174163	0.3597	17
REACTOME_DNA_REPAIR	-0.125685	2.23383e-05	0.000602184	96
REACTOME_EFFECTS_OF_PIP2_HYDROLYSIS	-0.0785454	0.192592	0.383405	23
REACTOME_RNA_POL_II_PRE_TRANSCRIPTION_EVENTS	-0.098065	0.0230676	0.0961402	45
REACTOME_ROLE_OF_DCC_IN_REGULATING_APOPTOSIS	0.155211	0.089303	0.232335	10
REACTOME_POST_TRANSLATIONAL_PROTEIN_MODIFICATION	-0.0398137	0.0735708	0.208067	172
REACTOME_CHROMOSOME_MAINTENANCE	-0.160566	7.08681e-08	5.28176e-06	95
REACTOME_DEPOSITION_OF_NEW_CENPA_CONTAINING_NUCLEOSOMES_AT_THE_CENTROMERE	-0.160433	0.000386273	0.00543786	41
REACTOME_L1CAM_INTERACTIONS	-0.000366163	0.991106	0.993458	78
REACTOME_SIGNALING_BY_ILS	-0.120419	3.71198e-05	0.000887373	99
REACTOME_NETRIN1_SIGNALING	0.0130997	0.785894	0.894954	36
REACTOME_METABOLISM_OF_LIPIDS_AND_LIPOPROTEINS	0.0362406	0.00886783	0.0520164	461
REACTOME_INTERACTION_BETWEEN_L1_AND_ANKYRINS	0.138353	0.0282868	0.110668	21
REACTOME_SIGNAL_TRANSDUCTION_BY_L1	-0.06764	0.200226	0.391491	30
REACTOME_FATTY_ACID_TRIACYLGLYCEROL_AND_KETONE_BODY_METABOLISM	0.0605868	0.00781138	0.0482782	164
REACTOME_TRANSPORT_OF_VITAMINS_NUCLEOSIDES_AND_RELATED_MOLECULES	-0.0179086	0.730302	0.865586	31
REACTOME_HIGHLY_CALCIUM_PERMEABLE_POSTSYNAPTIC_NICOTINIC_ACETYLCHOLINE_RECEPTORS	0.276007	0.000934905	0.0106684	12
REACTOME_RNA_POL_I_PROMOTER_OPENING	0.00816824	0.887673	0.951507	25
REACTOME_PRESYNAPTIC_NICOTINIC_ACETYLCHOLINE_RECEPTORS	0.197561	0.0178451	0.0807514	12
REACTOME_ORGANIC_CATION_ANION_ZWITTERION_TRANSPORT	-0.0279907	0.726864	0.864729	13
REACTOME_DCC_MEDIATED_ATTRACTIVE_SIGNALING	0.0169017	0.839403	0.920004	12
REACTOME_RECYCLING_PATHWAY_OF_L1	-0.121004	0.0447203	0.147171	23
REACTOME_SYNTHESIS_OF_SUBSTRATES_IN_N_GLYCAN_BIOSYTHESIS	-0.00312894	0.96768	0.986088	14
REACTOME_RESPIRATORY_ELECTRON_TRANSPORT	0.0482929	0.19673	0.386445	60
REACTOME_ASPARAGINE_N_LINKED_GLYCOSYLATION	0.00706148	0.829784	0.913411	78
REACTOME_ASSEMBLY_OF_THE_PRE_REPLICATIVE_COMPLEX	-0.115047	0.00455509	0.0318856	51
REACTOME_BIOSYNTHESIS_OF_THE_N_GLYCAN_PRECURSOR_DOLICHOL_LIPID_LINKED_OLIGOSACCHARIDE_LLO_AND_TRANSFER_TO_A_NASCENT_PROTEIN	-0.0693165	0.212937	0.408157	27
REACTOME_IL1_SIGNALING	-0.115348	0.016759	0.0780649	36
REACTOME_GLOBAL_GENOMIC_NER_GG_NER	-0.0498778	0.329363	0.532923	32
REACTOME_CGMP_EFFECTS	-0.0308086	0.642201	0.814303	19
REACTOME_REGULATION_OF_SIGNALING_BY_CBL	-0.0946164	0.164853	0.349865	18
REACTOME_AMINO_ACID_SYNTHESIS_AND_INTERCONVERSION_TRANSAMINATION	0.039683	0.58281	0.774026	16
REACTOME_CALNEXIN_CALRETICULIN_CYCLE	0.0340711	0.695682	0.84953	11
REACTOME_SYNTHESIS_SECRETION_AND_INACTIVATION_OF_GIP	-0.190417	0.0224209	0.0952307	12
REACTOME_PASSIVE_TRANSPORT_BY_AQUAPORINS	0.0166439	0.855426	0.930321	10
REACTOME_NEPHRIN_INTERACTIONS	0.0588882	0.374493	0.576528	19
REACTOME_IL_3_5_AND_GM_CSF_SIGNALING	-0.0861003	0.056804	0.172592	41
REACTOME_NITRIC_OXIDE_STIMULATES_GUANYLATE_CYCLASE	-0.00289447	0.96008	0.98318	25
REACTOME_PLATELET_HOMEOSTASIS	0.00982293	0.779941	0.89106	68
REACTOME_N_GLYCAN_TRIMMING_IN_THE_ER_AND_CALNEXIN_CALRETICULIN_CYCLE	0.0153263	0.848322	0.925775	13
REACTOME_PLATELET_SENSITIZATION_BY_LDL	-0.028946	0.707784	0.858968	14
REACTOME_AQUAPORIN_MEDIATED_TRANSPORT	-0.0194848	0.66642	0.829424	41
REACTOME_IL_RECEPTOR_SHC_SIGNALING	-0.138986	0.0142514	0.0708401	26
REACTOME_RAP1_SIGNALLING	0.113062	0.158269	0.342196	13
REACTOME_PLATELET_CALCIUM_HOMEOSTASIS	0.0694065	0.336698	0.539996	16
REACTOME_SIGNAL_REGULATORY_PROTEIN_SIRP_FAMILY_INTERACTIONS	0.174835	0.0360527	0.130139	12
REACTOME_PROSTACYCLIN_SIGNALLING_THROUGH_PROSTACYCLIN_RECEPTOR	0.00236561	0.976449	0.989576	13
REACTOME_GABA_SYNTHESIS_RELEASE_REUPTAKE_AND_DEGRADATION	0.125082	0.0833889	0.224161	16
REACTOME_INCRETIN_SYNTHESIS_SECRETION_AND_INACTIVATION	-0.0995203	0.133392	0.30562	19
REACTOME_TRANSPORT_OF_ORGANIC_ANIONS	-0.125703	0.14898	0.326571	11
REACTOME_SYNTHESIS_SECRETION_AND_INACTIVATION_OF_GLP1	-0.109819	0.117168	0.279569	17
REACTOME_REGULATION_OF_WATER_BALANCE_BY_RENAL_AQUAPORINS	-0.036205	0.465564	0.669545	34
REACTOME_DESTABILIZATION_OF_MRNA_BY_BRF1	-0.0288487	0.680646	0.837261	17
REACTOME_TRAF6_MEDIATED_IRF7_ACTIVATION	-0.113676	0.031342	0.118186	30
REACTOME_CIRCADIAN_CLOCK	-0.0154412	0.717557	0.860118	46
REACTOME_TRAF6_MEDIATED_NFKB_ACTIVATION	-0.198927	0.00208568	0.0182245	20
REACTOME_FACTORS_INVOLVED_IN_MEGAKARYOCYTE_DEVELOPMENT_AND_PLATELET_PRODUCTION	-0.0726313	0.00908543	0.0523238	109
REACTOME_REGULATION_OF_IFNG_SIGNALING	-0.175887	0.0281694	0.110668	13
REACTOME_GABA_A_RECEPTOR_ACTIVATION	-0.16939	0.0422514	0.142753	12
REACTOME_REGULATION_OF_MRNA_STABILITY_BY_PROTEINS_THAT_BIND_AU_RICH_ELEMENTS	-0.0576206	0.103754	0.255954	67
REACTOME_INHIBITION_OF_VOLTAGE_GATED_CA2_CHANNELS_VIA_GBETA_GAMMA_SUBUNITS	-0.0384724	0.56178	0.753321	19
REACTOME_TRAF6_MEDIATED_INDUCTION_OF_NFKB_AND_MAP_KINASES_UPON_TLR7_8_OR_9_ACTIVATION	-0.120896	0.000584565	0.00727139	68
REACTOME_TRAF3_DEPENDENT_IRF_ACTIVATION_PATHWAY	-0.20671	0.00743356	0.0466254	14
REACTOME_GABA_B_RECEPTOR_ACTIVATION	-0.018982	0.710483	0.859869	32
REACTOME_NFKB_ACTIVATION_THROUGH_FADD_RIP1_PATHWAY_MEDIATED_BY_CASPASE_8_AND10	-0.152224	0.0679689	0.198425	12
REACTOME_DESTABILIZATION_OF_MRNA_BY_KSRP	0.0614745	0.394815	0.597647	16
REACTOME_TRANSPORT_TO_THE_GOLGI_AND_SUBSEQUENT_MODIFICATION	0.048982	0.330717	0.532923	33
REACTOME_IRON_UPTAKE_AND_TRANSPORT	0.00690377	0.886162	0.951507	36
REACTOME_DESTABILIZATION_OF_MRNA_BY_TRISTETRAPROLIN_TTP	0.0103475	0.882637	0.951507	17
REACTOME_INTERFERON_GAMMA_SIGNALING	-0.0345707	0.355428	0.558718	60
REACTOME_N_GLYCAN_ANTENNAE_ELONGATION	0.107884	0.162403	0.347655	14
REACTOME_ACTIVATION_OF_IRF3_IRF7_MEDIATED_BY_TBK1_IKK_EPSILON	-0.225991	0.0133642	0.0681319	10
REACTOME_ION_TRANSPORT_BY_P_TYPE_ATPASES	-0.0045538	0.92904	0.972105	32
REACTOME_INTERFERON_ALPHA_BETA_SIGNALING	-0.0580234	0.114917	0.276281	62
REACTOME_ADVANCED_GLYCOSYLATION_ENDPRODUCT_RECEPTOR_SIGNALING	-0.10865	0.212262	0.407479	11
REACTOME_GABA_RECEPTOR_ACTIVATION	-0.0462326	0.278786	0.48123	46
REACTOME_KINESINS	-0.124953	0.038193	0.134046	23
REACTOME_N_GLYCAN_ANTENNAE_ELONGATION_IN_THE_MEDIAL_TRANS_GOLGI	0.101645	0.135672	0.308611	18
REACTOME_REGULATION_OF_IFNA_SIGNALING	-0.0654292	0.267583	0.467729	24
REACTOME_INTERFERON_SIGNALING	-0.0581467	0.0151947	0.0732005	148
REACTOME_NEGATIVE_REGULATORS_OF_RIG_I_MDA5_SIGNALING	-0.0934042	0.121277	0.287212	23
REACTOME_NFKB_AND_MAP_KINASES_ACTIVATION_MEDIATED_BY_TLR4_SIGNALING_REPERTOIRE	-0.11263	0.00203891	0.0179825	63
REACTOME_TRANSFERRIN_ENDOCYTOSIS_AND_RECYCLING	0.0311424	0.590211	0.778955	25
REACTOME_DSCAM_INTERACTIONS	0.206584	0.0177064	0.080698	11
REACTOME_ION_CHANNEL_TRANSPORT	-0.014469	0.716104	0.860009	53
REACTOME_DESTABILIZATION_OF_MRNA_BY_AUF1_HNRNP_D0	-0.0883529	0.059818	0.179211	38
REACTOME_TRAF6_MEDIATED_INDUCTION_OF_TAK1_COMPLEX	-0.206204	0.0239886	0.0986803	10
REACTOME_RIG_I_MDA5_MEDIATED_INDUCTION_OF_IFN_ALPHA_BETA_PATHWAYS	-0.127945	0.000413358	0.00562905	64
REACTOME_LIGAND_GATED_ION_CHANNEL_TRANSPORT	-0.0294421	0.640686	0.814303	21
REACTOME_FORMATION_OF_INCISION_COMPLEX_IN_GG_NER	-0.0684865	0.289324	0.49337	20
REACTOME_TRANSCRIPTIONAL_REGULATION_OF_WHITE_ADIPOCYTE_DIFFERENTIATION	-0.0528237	0.130181	0.301331	69
REACTOME_ENDOSOMAL_SORTING_COMPLEX_REQUIRED_FOR_TRANSPORT_ESCRT	0.178123	0.00385209	0.027574	22
REACTOME_MEIOTIC_RECOMBINATION	-0.0636102	0.12801	0.29814	48
REACTOME_IL_2_SIGNALING	-0.0766809	0.102366	0.253812	38
REACTOME_IL_6_SIGNALING	-0.223854	0.0142648	0.0708401	10
REACTOME_PLATELET_AGGREGATION_PLUG_FORMATION	0.0340762	0.492203	0.694456	34
REACTOME_SIGNALING_BY_NOTCH	-0.0739607	0.0150956	0.0730003	91
REACTOME_LAGGING_STRAND_SYNTHESIS	-0.134413	0.0426554	0.142974	19
REACTOME_INTRINSIC_PATHWAY	-0.0401025	0.578832	0.771721	16
REACTOME_INHIBITION_OF_REPLICATION_INITIATION_OF_DAMAGED_DNA_BY_RB1_E2F1	-0.132586	0.127968	0.29814	11
REACTOME_ETHANOL_OXIDATION	0.107459	0.239456	0.439697	10
REACTOME_SYNTHESIS_OF_VERY_LONG_CHAIN_FATTY_ACYL_COAS	0.13869	0.0725024	0.206428	14
REACTOME_DNA_REPLICATION	-0.182423	3.59387e-16	5.05937e-14	170
REACTOME_CLEAVAGE_OF_GROWING_TRANSCRIPT_IN_THE_TERMINATION_REGION_	-0.0742104	0.159922	0.345182	30
REACTOME_PKB_MEDIATED_EVENTS	0.0244171	0.655043	0.822536	28
REACTOME_E2F_MEDIATED_REGULATION_OF_DNA_REPLICATION	-0.180784	0.0004072	0.00560786	32
REACTOME_METABOLISM_OF_CARBOHYDRATES	0.0390403	0.0445829	0.147171	227
REACTOME_HORMONE_SENSITIVE_LIPASE_HSL_MEDIATED_TRIACYLGLYCEROL_HYDROLYSIS	0.0722581	0.42894	0.632673	10
REACTOME_SIGNALING_BY_INSULIN_RECEPTOR	-0.0118752	0.679753	0.836975	102
REACTOME_SIGNAL_ATTENUATION	-0.053516	0.521085	0.722336	12
REACTOME_PURINE_METABOLISM	0.138885	0.00660744	0.0433763	32
REACTOME_SOS_MEDIATED_SIGNALLING	0.0108657	0.896342	0.958697	12
REACTOME_RNA_POL_III_TRANSCRIPTION_INITIATION_FROM_TYPE_3_PROMOTER	-0.115733	0.0548787	0.169412	23
REACTOME_APOPTOSIS	-0.0247519	0.337773	0.540351	127
REACTOME_LIPID_DIGESTION_MOBILIZATION_AND_TRANSPORT	0.0908913	0.0418453	0.141903	42
REACTOME_HEMOSTASIS	-0.0477629	0.00104276	0.0115893	414
REACTOME_INFLUENZA_LIFE_CYCLE	-0.0348466	0.273957	0.476137	83
REACTOME_INFLUENZA_VIRAL_RNA_TRANSCRIPTION_AND_REPLICATION	-0.0457758	0.263686	0.462729	50
REACTOME_NEP_NS2_INTERACTS_WITH_THE_CELLULAR_EXPORT_MACHINERY	-0.0115648	0.838406	0.919706	26
REACTOME_HIV_INFECTION	-0.0489698	0.0353256	0.128245	157
REACTOME_TRANSPORT_OF_RIBONUCLEOPROTEINS_INTO_THE_HOST_NUCLEUS	-0.0262588	0.637044	0.814303	27
REACTOME_HIV_LIFE_CYCLE	-0.0406793	0.169949	0.353196	96
REACTOME_ABORTIVE_ELONGATION_OF_HIV1_TRANSCRIPT_IN_THE_ABSENCE_OF_TAT	-0.209529	0.011994	0.0638503	12
REACTOME_EARLY_PHASE_OF_HIV_LIFE_CYCLE	-0.0811177	0.330738	0.532923	12
REACTOME_HOST_INTERACTIONS_OF_HIV_FACTORS	-0.0518195	0.0788886	0.216815	97
REACTOME_RNA_POL_III_TRANSCRIPTION_TERMINATION	0.0167301	0.816868	0.908667	16
REACTOME_RESPIRATORY_ELECTRON_TRANSPORT_ATP_SYNTHESIS_BY_CHEMIOSMOTIC_COUPLING_AND_HEAT_PRODUCTION_BY_UNCOUPLING_PROTEINS_	0.0705657	0.0363486	0.130464	74
REACTOME_FORMATION_OF_THE_HIV1_EARLY_ELONGATION_COMPLEX	-0.104151	0.0910579	0.234493	22
REACTOME_LATE_PHASE_OF_HIV_LIFE_CYCLE	-0.0347278	0.272752	0.475347	84
REACTOME_SHC_MEDIATED_SIGNALLING	-0.037176	0.642702	0.814303	13
REACTOME_INTERACTIONS_OF_VPR_WITH_HOST_CELLULAR_PROTEINS	-0.0284839	0.583495	0.774124	31
REACTOME_FORMATION_OF_ATP_BY_CHEMIOSMOTIC_COUPLING	0.127431	0.143473	0.320601	11
REACTOME_APC_C_CDH1_MEDIATED_DEGRADATION_OF_CDC20_AND_OTHER_APC_C_CDH1_TARGETED_PROTEINS_IN_LATE_MITOSIS_EARLY_G1	-0.119531	0.0032038	0.0244531	51
REACTOME_ACTIVATION_OF_ATR_IN_RESPONSE_TO_REPLICATION_STRESS	-0.17769	0.000279679	0.00412039	35
REACTOME_UNWINDING_OF_DNA	-0.0265048	0.760907	0.880428	11
REACTOME_APC_C_CDC20_MEDIATED_DEGRADATION_OF_MITOTIC_PROTEINS	-0.117051	0.0035648	0.0262593	52
REACTOME_GLUCURONIDATION	0.207442	0.0172398	0.0794283	11
REACTOME_AUTODEGRADATION_OF_CDH1_BY_CDH1_APC_C	-0.105433	0.0169206	0.0785288	43
REACTOME_MYD88_MAL_CASCADE_INITIATED_ON_PLASMA_MEMBRANE	-0.126754	0.000170201	0.00291411	74
REACTOME_INNATE_IMMUNE_SYSTEM	-0.121907	7.59585e-11	6.41596e-09	245
REACTOME_REGULATION_OF_GLUCOKINASE_BY_GLUCOKINASE_REGULATORY_PROTEIN	0.0250832	0.652196	0.820994	27
REACTOME_MITOTIC_PROMETAPHASE	-0.245638	3.66144e-14	4.21732e-12	80
REACTOME_APC_C_CDC20_MEDIATED_DEGRADATION_OF_CYCLIN_B	-0.139563	0.0533846	0.167008	16
REACTOME_SCF_BETA_TRCP_MEDIATED_DEGRADATION_OF_EMI1	-0.0833247	0.0840075	0.225027	36
REACTOME_LIPOPROTEIN_METABOLISM	0.058476	0.293379	0.495614	27
REACTOME_G1_S_SPECIFIC_TRANSCRIPTION	-0.172138	0.0140543	0.0703824	17
REACTOME_THE_ROLE_OF_NEF_IN_HIV1_REPLICATION_AND_DISEASE_PATHOGENESIS	0.00312963	0.959503	0.98318	22
REACTOME_CHYLOMICRON_MEDIATED_LIPID_TRANSPORT	0.0211409	0.776906	0.888733	15
REACTOME_SIGNALING_BY_TGF_BETA_RECEPTOR_COMPLEX	-0.102453	0.0115253	0.0618751	51
REACTOME_CONVERSION_FROM_APC_C_CDC20_TO_APC_C_CDH1_IN_LATE_ANAPHASE	-0.138595	0.0632262	0.188046	15
REACTOME_ACTIVATED_TLR4_SIGNALLING	-0.138023	1.46978e-05	0.000427958	83
REACTOME_IMMUNE_SYSTEM	-0.0861438	5.7725e-16	7.31376e-14	819
REACTOME_PHOSPHORYLATION_OF_THE_APC_C	-0.148539	0.0397775	0.137079	16
REACTOME_CYTOSOLIC_SULFONATION_OF_SMALL_MOLECULES	0.157122	0.0418878	0.141903	14
REACTOME_GLUTATHIONE_CONJUGATION	0.12135	0.0441127	0.146695	23
REACTOME_COMPLEMENT_CASCADE	-0.0962014	0.0783695	0.215857	28
REACTOME_PHASE_II_CONJUGATION	0.160583	1.28314e-05	0.000406434	62
REACTOME_MTORC1_MEDIATED_SIGNALLING	0.0575268	0.508971	0.709984	11
REACTOME_TOLL_RECEPTOR_CASCADES	-0.129461	4.50779e-06	0.000173072	106
REACTOME_ACTIVATION_OF_BH3_ONLY_PROTEINS	-0.00833461	0.917162	0.969158	13
REACTOME_GLUCOSE_METABOLISM	0.121185	0.00144572	0.0140902	58
REACTOME_RNA_POL_III_CHAIN_ELONGATION	-0.0121563	0.874917	0.946643	14
REACTOME_VOLTAGE_GATED_POTASSIUM_CHANNELS	0.104035	0.0184352	0.0827848	43
REACTOME_ADAPTIVE_IMMUNE_SYSTEM	-0.0479556	0.000585384	0.00727139	454
REACTOME_NOD1_2_SIGNALING_PATHWAY	-0.06168	0.250769	0.44839	29
REACTOME_CYTOKINE_SIGNALING_IN_IMMUNE_SYSTEM	-0.0833168	6.50713e-06	0.000241583	252
REACTOME_MEIOTIC_SYNAPSIS	-0.101021	0.0146056	0.0715026	49
REACTOME_ANTIGEN_PRESENTATION_FOLDING_ASSEMBLY_AND_PEPTIDE_LOADING_OF_CLASS_I_MHC	0.0668076	0.301309	0.502976	20
REACTOME_THE_NLRP3_INFLAMMASOME	-0.109593	0.208321	0.402966	11
REACTOME_CLASS_I_MHC_MEDIATED_ANTIGEN_PROCESSING_PRESENTATION	-0.0492037	0.0165042	0.0774477	203
REACTOME_NONSENSE_MEDIATED_DECAY_ENHANCED_BY_THE_EXON_JUNCTION_COMPLEX	-0.0309249	0.424392	0.627426	56
REACTOME_PIP3_ACTIVATES_AKT_SIGNALING	-0.0767771	0.175774	0.360366	26
REACTOME_ANTIGEN_PROCESSING_UBIQUITINATION_PROTEASOME_DEGRADATION	-0.0731325	0.00115794	0.0121248	168
REACTOME_TANDEM_PORE_DOMAIN_POTASSIUM_CHANNELS	-0.0995414	0.232661	0.430338	12
REACTOME_INFLAMMASOMES	-0.0975334	0.177004	0.361717	16
REACTOME_POTASSIUM_CHANNELS	0.0465534	0.124084	0.292219	92
REACTOME_NUCLEOTIDE_BINDING_DOMAIN_LEUCINE_RICH_REPEAT_CONTAINING_RECEPTOR_NLR_SIGNALING_PATHWAYS	-0.067775	0.120423	0.28626	44
REACTOME_INWARDLY_RECTIFYING_K_CHANNELS	0.0257616	0.65597	0.822886	25
REACTOME_AMYLOIDS	0.050668	0.251047	0.44839	43
REACTOME_PACKAGING_OF_TELOMERE_ENDS	-0.0949721	0.0822579	0.223171	28
REACTOME_TELOMERE_MAINTENANCE	-0.118295	0.00245779	0.0203531	55
REACTOME_PLATELET_ACTIVATION_SIGNALING_AND_AGGREGATION	-0.0294397	0.176124	0.3605	180
REACTOME_REMOVAL_OF_THE_FLAP_INTERMEDIATE_FROM_THE_C_STRAND	-0.0882872	0.333805	0.536715	10
REACTOME_APC_CDC20_MEDIATED_DEGRADATION_OF_NEK2A	-0.162398	0.0171285	0.0792035	18
REACTOME_INITIAL_TRIGGERING_OF_COMPLEMENT	-0.0556021	0.504972	0.70696	12
REACTOME_EXTENSION_OF_TELOMERES	-0.141655	0.0109166	0.059362	27
REACTOME_G2_M_CHECKPOINTS	-0.180571	6.4743e-05	0.00130205	41
REACTOME_S_PHASE	-0.108569	0.000335125	0.00482504	92
REACTOME_SCFSKP2_MEDIATED_DEGRADATION_OF_P27_P21	-0.114178	0.013743	0.0693719	39
REACTOME_TRYPTOPHAN_CATABOLISM	-0.0298588	0.731752	0.866476	11
REACTOME_DNA_STRAND_ELONGATION	-0.0949861	0.0720557	0.205618	30
REACTOME_RESOLUTION_OF_AP_SITES_VIA_THE_SINGLE_NUCLEOTIDE_REPLACEMENT_PATHWAY	-0.0627045	0.452143	0.653956	12
REACTOME_FGFR_LIGAND_BINDING_AND_ACTIVATION	-0.0574218	0.351511	0.553937	22
REACTOME_CHOLESTEROL_BIOSYNTHESIS	0.112601	0.0742548	0.209069	21
REACTOME_GAP_JUNCTION_TRAFFICKING	0.0435283	0.44274	0.644772	26
REACTOME_FGFR2C_LIGAND_BINDING_AND_ACTIVATION	0.0053371	0.948975	0.979114	12
REACTOME_METABOLISM_OF_PORPHYRINS	-0.0245259	0.759557	0.87967	13
REACTOME_FGFR4_LIGAND_BINDING_AND_ACTIVATION	-0.0549706	0.509822	0.709984	12
REACTOME_VIF_MEDIATED_DEGRADATION_OF_APOBEC3G	-0.0800479	0.106663	0.260202	34
REACTOME_SIGNALING_BY_FGFR	-0.0609874	0.0376585	0.133061	98
REACTOME_FGFR1_LIGAND_BINDING_AND_ACTIVATION	0.033939	0.660306	0.825057	14
REACTOME_GAP_JUNCTION_ASSEMBLY	0.0426803	0.530967	0.73044	18
REACTOME_SYNTHESIS_OF_GLYCOSYLPHOSPHATIDYLINOSITOL_GPI	-0.169575	0.0155502	0.0735177	17
REACTOME_RNA_POL_I_TRANSCRIPTION_INITIATION	-0.0255261	0.678758	0.836753	22
REACTOME_PYRIMIDINE_METABOLISM	0.0160407	0.79017	0.894954	23
REACTOME_INTRINSIC_PATHWAY_FOR_APOPTOSIS	-0.019135	0.735796	0.8684	26
REACTOME_PI3K_CASCADE	-0.0218699	0.536905	0.736211	67
REACTOME_APOPTOTIC_EXECUTION_PHASE	0.0394201	0.331026	0.532923	51
REACTOME_SHC_RELATED_EVENTS	-0.0631868	0.413224	0.6174	14
NABA_COLLAGENS	0.152474	0.000476196	0.0061393	44
NABA_ECM_GLYCOPROTEINS	0.0359609	0.0865325	0.227935	194
NABA_ECM_REGULATORS	-0.00162963	0.933182	0.972105	227
NABA_ECM_AFFILIATED	0.0727843	0.00159269	0.0149477	160
NABA_PROTEOGLYCANS	0.0389384	0.432566	0.63654	34
NABA_SECRETED_FACTORS	-0.0923373	1.1526e-08	9.12714e-07	332
NABA_CORE_MATRISOME	0.0563084	0.00156666	0.0149245	272
NABA_MATRISOME_ASSOCIATED	-0.0280034	0.0130543	0.0675096	719
NABA_BASEMENT_MEMBRANES	0.0456926	0.318025	0.521265	40
NABA_MATRISOME	-0.00407222	0.677512	0.836655	991

## Sheet: GO
	stat	pval	p.adj	num.genes
RNA.binding	-0.0540535	6.72697e-10	8.26115e-08	1170
cytosol	0.00813864	0.108671	0.329763	4435
metal.ion.binding	-0.0365948	7.14775e-08	5.91554e-06	2066
adaptive.immune.response	-0.0354851	0.117285	0.345056	164
plasma.membrane	0.0681438	1.84094e-38	1.00121e-35	3985
T.cell.receptor.complex	0.0547345	0.462959	0.729506	15
extracellular.region	0.00600482	0.425046	0.697177	1633
receptor.mediated.endocytosis	0.0589999	0.0506062	0.209152	92
complement.activation	-0.0667256	0.230125	0.497776	27
complement.activation..classical.pathway	-0.0499089	0.306919	0.588339	35
regulation.of.complement.activation	-0.0676754	0.112346	0.335979	46
Fc.epsilon.receptor.signaling.pathway	-0.046812	0.115042	0.34136	95
Fc.gamma.receptor.signaling.pathway.involved.in.phagocytosis	0.0470376	0.196773	0.45668	63
regulation.of.immune.response	0.00525394	0.835029	0.935201	132
leukocyte.migration	-0.0532774	0.0398309	0.179528	125
innate.immune.response	-0.0542563	0.000405839	0.00772514	362
channel.activity	-0.0109352	0.900056	0.958278	11
integral.component.of.membrane	0.0553273	3.3491e-22	1.0625e-19	3166
protein.peptidyl.prolyl.isomerization	0.0544807	0.286185	0.566567	32
cytoplasm	0.0015688	0.767229	0.90066	3886
T.cell.receptor.signaling.pathway	-0.0362577	0.126976	0.359638	149
B.cell.receptor.signaling.pathway	-0.0396317	0.410621	0.681444	36
membrane.repolarization.during.ventricular.cardiac.muscle.cell.action.potential	0.00980512	0.914493	0.964967	10
nucleic.acid.binding	-0.108261	3.37068e-06	0.000183317	155
regulation.of.transcription..DNA.templated	-0.0950643	6.91493e-12	1.25358e-09	446
intra.Golgi.vesicle.mediated.transport	0.0424177	0.445542	0.714481	27
Golgi.transport.complex	-0.0200914	0.825859	0.932117	10
regulation.of.transcription.by.RNA.polymerase.II	-0.0899149	4.26829e-22	1.24995e-19	1027
condensed.chromosome.kinetochore	-0.154718	6.60081e-06	0.000310238	71
Rho.guanyl.nucleotide.exchange.factor.activity	0.0140743	0.690446	0.863963	67
small.GTPase.mediated.signal.transduction	0.0583062	0.0789728	0.272224	76
regulation.of.Rho.protein.signal.transduction	0.0425129	0.180815	0.437056	83
tRNA.binding	0.0369379	0.339134	0.621011	56
nucleolus	-0.0622704	1.33003e-08	1.26586e-06	726
aminoacyl.tRNA.metabolism.involved.in.translational.fidelity	0.133354	0.12563	0.358256	11
iron.ion.binding	0.08431	0.00150185	0.0210979	119
ubiquitin.dependent.protein.catabolic.process	-0.0492841	0.00922119	0.0729216	236
protein.deubiquitination	-0.0493336	0.0138715	0.0949809	210
thiol.dependent.ubiquitinyl.hydrolase.activity	-0.0435161	0.292065	0.574241	49
fatty.acid.biosynthetic.process	0.179332	8.70689e-05	0.00251115	40
actin.filament.organization	-0.012443	0.702327	0.867821	79
mitochondrion	0.0256336	0.00458152	0.0473731	1092
xenobiotic.metabolic.process	0.159811	6.69627e-07	4.55227e-05	81
exogenous.drug.catabolic.process	0.252093	6.35641e-05	0.00205075	21
aromatase.activity	0.198246	0.0227958	0.129881	11
defense.response.to.bacterium	-0.114823	3.49111e-05	0.00124212	109
calcium.ion.binding	0.0747557	1.96403e-10	2.5783e-08	628
centrosome	-0.0913391	1.54543e-10	2.10123e-08	420
microtubule.binding	-0.0346425	0.079085	0.272224	217
microtubule.anchoring	0.0263963	0.751524	0.892962	12
DNA.methylation	-0.195839	0.00147391	0.0210377	22
enzyme.binding	-0.0301586	0.0693452	0.252146	308
enzyme.regulator.activity	-0.0241219	0.738326	0.886345	16
regulation.of.catalytic.activity	0.0387862	0.35264	0.627924	48
protein.kinase.activity	-0.00749743	0.719837	0.876654	193
ATP.binding	0.0148757	0.0684876	0.250704	1363
protein.phosphorylation	-0.0044835	0.747381	0.891584	442
ubiquitin.protein.transferase.activity	-0.0452979	0.0352828	0.169813	182
protein.ubiquitination	-0.0393189	0.0088602	0.0714636	378
ATPase.activity	0.0403441	0.0629511	0.237989	179
aminoacyl.tRNA.editing.activity	0.133354	0.12563	0.358256	11
nucleoplasm	-0.0833364	4.00968e-44	3.05297e-41	2810
integral.component.of.plasma.membrane	0.0467759	3.01332e-08	2.73136e-06	1267
peptide.antigen.binding	0.230758	6.50565e-05	0.00208126	25
transmembrane.receptor.protein.serine.threonine.kinase.signaling.pathway	-0.0220282	0.800274	0.920436	11
membrane	0.0192358	0.00747787	0.0648479	1811
magnesium.ion.binding	0.0204963	0.325583	0.609245	194
DNA.binding	-0.100978	1.01018e-32	4.80718e-30	1256
extracellular.space	0.0281849	0.000666833	0.0113051	1321
activation.of.protein.kinase.activity	-0.043227	0.154316	0.399105	91
DNA.directed.5..3..RNA.polymerase.activity	-0.0507973	0.468371	0.734991	17
transcription.by.RNA.polymerase.III	-0.0796041	0.137905	0.376585	29
negative.regulation.of.cell.adhesion	0.0204267	0.643089	0.840453	43
sodium.channel.activity	0.116437	0.202281	0.46655	10
sodium.ion.transmembrane.transport	0.0638285	0.0752316	0.265191	65
positive.regulation.of.cell.proliferation	-0.0771725	2.31578e-08	2.15028e-06	449
negative.regulation.of.apoptotic.process	-0.0294134	0.0334238	0.163975	448
negative.regulation.of.cell.differentiation	-0.103522	0.0234991	0.131407	40
negative.regulation.of.transcription..DNA.templated	-0.0671412	3.29176e-07	2.5575e-05	497
GTP.binding	0.0149587	0.370755	0.646275	304
MHC.class.II.protein.complex	0.168781	0.0287676	0.150134	14
G.protein.coupled.receptor.activity	0.209292	4.1594e-69	5.27827e-66	610
olfactory.receptor.activity	0.304946	4.58912e-89	8.73539e-86	367
detection.of.chemical.stimulus.involved.in.sensory.perception.of.smell	0.304946	4.58912e-89	8.73539e-86	367
endopeptidase.inhibitor.activity	0.00390956	0.939951	0.975987	31
negative.regulation.of.endopeptidase.activity	-0.0168374	0.507735	0.759003	130
G.protein.coupled.receptor.signaling.pathway	0.14619	1.31394e-54	1.25054e-51	1006
oxidoreductase.activity..acting.on.paired.donors..with.incorporation.or.reduction.of.molecular.oxygen..reduced.flavin.or.flavoprotein.as.one.donor..and.incorporation.of.one.atom.of.oxygen	0.197634	0.00171713	0.0229716	21
heme.binding	0.0817318	0.00175903	0.0231717	123
oxidation.reduction.process	0.0489029	0.0002377	0.00502735	485
zinc.ion.binding	-0.036403	0.000840308	0.0134981	734
positive.regulation.of.transcription.by.RNA.polymerase.II	-0.0636434	3.24658e-12	6.50513e-10	1068
Golgi.apparatus	0.00292453	0.772423	0.904527	860
mRNA.3..UTR.binding	-0.0751668	0.0309036	0.157286	69
structural.constituent.of.ribosome	-0.0375265	0.174213	0.428996	110
ribosome	-0.00932967	0.874292	0.952241	24
translation	-0.0275542	0.299533	0.580909	119
regulation.of.translation	-0.0545782	0.210427	0.476107	44
translation.regulator.activity	0.0447756	0.591203	0.814325	12
cytokine.production	-0.129557	0.0222222	0.127794	26
protein.binding	-0.0327076	4.13017e-13	8.73531e-11	8648
neutrophil.chemotaxis	-0.0876156	0.00873174	0.0707271	75
ribosome.binding	-0.0287008	0.524906	0.770956	41
P.body	-0.0155061	0.656148	0.848491	69
nuclear.transcribed.mRNA.catabolic.process	0.0307681	0.723811	0.87681	11
mRNA.processing	-0.0775467	0.00288313	0.0337725	124
structural.constituent.of.eye.lens	0.245916	9.57235e-05	0.00262172	21
structural.molecule.activity	0.115018	1.39917e-06	8.76386e-05	148
intermediate.filament	0.0880805	0.127411	0.3601	25
keratinization	0.284774	7.59827e-10	9.03956e-08	39
nucleus	-0.0677094	8.11189e-43	5.147e-40	4854
myoblast.fusion	0.0103132	0.886424	0.953675	16
skeletal.muscle.tissue.regeneration	0.00838651	0.907536	0.962393	16
metalloendopeptidase.activity	-0.00385839	0.895051	0.956077	98
proteolysis	0.0195631	0.179074	0.435334	403
cell.adhesion	0.0406775	0.00543221	0.052622	399
ligase.activity	-0.0488368	0.592787	0.814325	10
small.molecule.binding	0.0750655	0.388621	0.661072	11
serine.type.endopeptidase.activity	0.0628754	0.00813277	0.0694203	149
DNA.binding.transcription.factor.activity	-0.0821625	6.1619e-12	1.17292e-09	606
protein.dimerization.activity	-0.0205273	0.392353	0.665636	146
cell.junction	0.0858681	5.09524e-11	7.75903e-09	503
ciliary.basal.body	-0.032564	0.242642	0.513513	108
late.endosome.membrane	0.112046	7.35833e-05	0.00227749	105
cellular.response.to.amino.acid.stimulus	0.0433123	0.299296	0.580909	48
negative.regulation.of.TORC1.signaling	-0.104805	0.19072	0.450545	13
axon	0.0818666	4.30636e-06	0.00022458	267
DNA.binding.transcription.factor.activity..RNA.polymerase.II.specific	-0.0899574	3.25405e-29	1.23882e-26	1419
RNA.polymerase.II.regulatory.region.sequence.specific.DNA.binding	-0.0349347	0.0407588	0.182123	291
actin.cytoskeleton	0.0214719	0.310593	0.594323	188
nuclear.body	-0.0567512	0.00173177	0.0229716	258
transmembrane.signaling.receptor.activity	-0.05086	0.0497355	0.207605	125
acetylcholine.gated.cation.selective.channel.activity	0.244088	0.00106343	0.0162589	15
ion.transmembrane.transport	0.073797	6.91148e-05	0.00217455	246
postsynaptic.membrane	0.0793301	0.000227221	0.00485973	182
excitatory.postsynaptic.potential	0.124438	0.000638275	0.0109951	63
transcription.initiation.from.RNA.polymerase.II.promoter	-0.0449358	0.0594153	0.228859	148
protein.heterodimerization.activity	0.00293509	0.83816	0.936544	414
sequence.specific.DNA.binding	-0.0635582	2.89618e-05	0.00106017	369
GTPase.activity	0.0381776	0.0368647	0.174124	253
heterotrimeric.G.protein.complex	0.0443486	0.452022	0.719719	24
voltage.gated.potassium.channel.activity	0.122444	0.00153179	0.0213609	56
potassium.ion.transmembrane.transport	0.0773329	0.00454252	0.0472491	113
phosphoprotein.phosphatase.activity	-0.0597445	0.273882	0.552553	28
protein.dephosphorylation	-0.00411864	0.870801	0.950357	131
glutathione.transferase.activity	0.152876	0.00953042	0.0738674	24
regulation.of.signal.transduction	-0.00183927	0.977857	0.989554	19
phospholipid.metabolic.process	0.0270425	0.516951	0.766966	48
dephosphorylation	0.036459	0.268889	0.546827	77
regulation.of.Wnt.signaling.pathway	0.0226361	0.707077	0.869651	23
sensory.perception.of.sound	0.0947923	0.000181663	0.00415945	131
methylation	0.0676461	0.0773873	0.27004	57
nucleosome	0.0614792	0.132687	0.368447	50
calcium.activated.cation.channel.activity	0.0161341	0.834428	0.935201	14
flagellated.sperm.motility	-0.118273	0.00241881	0.0300929	55
Golgi.membrane	0.0299942	0.0158528	0.102639	558
protein.glycosylation	-0.0498802	0.116377	0.344248	83
galactosyltransferase.activity	0.00615573	0.927955	0.973384	18
intracellular.signal.transduction	0.00143176	0.926053	0.971743	358
cell.matrix.adhesion	0.00760971	0.805206	0.922315	88
autophagy	0.0218915	0.442966	0.713107	103
defense.response.to.virus	-0.0493288	0.0229863	0.130222	179
hormone.activity	-0.0352488	0.26152	0.537875	85
cell.surface.receptor.signaling.pathway	-0.0812697	0.000187331	0.00420589	178
epidermis.development	0.144053	8.79236e-05	0.00251673	62
catalytic.activity	0.071917	0.0988893	0.311649	44
adenylate.cyclase.activating.G.protein.coupled.receptor.signaling.pathway	0.00683937	0.835694	0.935456	77
monooxygenase.activity	0.176743	0.00120835	0.0178996	28
cytoskeleton	0.0191084	0.235326	0.503591	328
mRNA.cap.binding.complex	-0.255018	0.00522782	0.051829	10
histone.H4.K5.acetylation	-0.0355284	0.657361	0.849039	13
histone.H4.K8.acetylation	-0.0355284	0.657361	0.849039	13
histone.H4.K16.acetylation	-0.146493	0.0577101	0.224186	14
cell	-0.0371529	0.262986	0.540015	76
hematopoietic.progenitor.cell.differentiation	-0.110839	0.00324168	0.0370603	59
cytidine.to.uridine.editing	0.075673	0.407287	0.678573	10
cilium	-0.00968892	0.662405	0.849941	171
smoothened.signaling.pathway	-0.0725111	0.050216	0.208458	61
intraciliary.transport.particle.B	0.0940198	0.179552	0.43594	17
axoneme.assembly	-0.140712	0.0789605	0.272224	13
intraciliary.transport.involved.in.cilium.assembly	0.0884919	0.0661808	0.245143	36
intraciliary.transport	0.0864834	0.126924	0.359638	26
cilium.assembly	-0.0498951	0.0316776	0.159309	156
protein.localization.to.cilium	0.000975431	0.986004	0.992187	27
ciliary.tip	0.0503969	0.258507	0.534276	42
protein.polyubiquitination	-0.0363053	0.0771149	0.269336	200
endoplasmic.reticulum	0.0153664	0.128616	0.362698	860
endoplasmic.reticulum.membrane	0.0483422	2.42492e-06	0.000137786	835
response.to.unfolded.protein	0.0279816	0.498098	0.752484	49
ubiquitin.dependent.ERAD.pathway	0.0071495	0.844457	0.937547	63
retrograde.protein.transport..ER.to.cytosol	0.111465	0.164042	0.413855	13
ubiquitin.protein.ligase.activity	-0.0243214	0.257072	0.532047	183
negative.regulation.of.transcription.by.RNA.polymerase.II	-0.0630828	3.76509e-09	4.09534e-07	763
RNA.polymerase.II.proximal.promoter.sequence.specific.DNA.binding	-0.0783439	1.31855e-08	1.26586e-06	451
proximal.promoter.sequence.specific.DNA.binding	-0.132218	0.0154583	0.101168	28
DNA.binding.transcription.repressor.activity..RNA.polymerase.II.specific	-0.0697394	0.000266615	0.00542783	231
placenta.development	-0.0487387	0.304986	0.586998	37
sprouting.angiogenesis	-0.0323552	0.560636	0.794139	27
transcription.corepressor.activity	-0.0754828	9.47482e-05	0.00261381	226
DNA.damage.response..signal.transduction.by.p53.class.mediator.resulting.in.cell.cycle.arrest	-0.067398	0.0959738	0.30524	51
cell.proliferation	-0.0850234	5.68218e-05	0.00184889	189
protein.homodimerization.activity	0.0297589	0.00503646	0.0507243	777
trophoblast.giant.cell.differentiation	-0.169253	0.0423332	0.186531	12
hepatocyte.differentiation	0.0203565	0.799384	0.919767	13
learning	0.00364207	0.924248	0.970652	57
locomotory.behavior	0.0734541	0.0231908	0.130531	80
hippocampus.development	0.0385189	0.298256	0.579612	61
dendritic.spine.development	0.0595869	0.440125	0.710584	14
calcium.dependent.phospholipid.binding	0.233488	1.12726e-08	1.12934e-06	50
glycosphingolipid.metabolic.process	0.0023512	0.959483	0.983027	39
lipid.transport	0.0965742	0.0109835	0.0811927	58
endocytosis	0.00528417	0.81233	0.925633	170
phosphatidylethanolamine.binding	0.091269	0.294538	0.576211	11
phosphatidylcholine.binding	0.0976269	0.0978186	0.309042	24
extrinsic.component.of.cytoplasmic.side.of.plasma.membrane	0.0589736	0.126981	0.359638	56
phosphatidylinositol.binding	0.0170022	0.594734	0.814325	82
identical.protein.binding	0.00423799	0.657858	0.849039	967
cadherin.binding	0.0663368	0.000126985	0.00324451	283
transcription.coregulator.activity	-0.0761806	0.0200683	0.120695	78
early.endosome	0.0414273	0.0397342	0.179528	208
microtubule	-0.0391564	0.0254584	0.139454	276
microtubule.associated.complex	-0.0592105	0.29602	0.577568	26
Ras.protein.signal.transduction	-0.0141827	0.683834	0.861183	69
axonogenesis	0.0712848	0.0365571	0.173496	72
microtubule.cytoskeleton	-0.0404478	0.131011	0.366429	117
kinesin.binding	0.059882	0.195711	0.455596	39
lamellipodium	0.0265695	0.249606	0.523385	158
filopodium	0.0554902	0.137228	0.376035	60
growth.cone	0.0353874	0.19409	0.45415	113
cell.leading.edge	0.0273852	0.59189	0.814325	32
perikaryon	0.0805308	0.0020548	0.0265174	123
axonal.growth.cone	0.0945886	0.088916	0.290311	27
positive.regulation.of.axon.extension	-0.025392	0.624654	0.834285	31
perinuclear.region.of.cytoplasm	0.0183663	0.120767	0.350428	618
neuron.projection.morphogenesis	0.082679	0.0323901	0.161188	56
actin.filament.binding	0.145627	1.15304e-11	1.99529e-09	183
regulation.of.establishment.of.cell.polarity	0.0522449	0.483554	0.745006	15
positive.regulation.of.neuron.migration	-0.0120255	0.880658	0.953056	13
oxidoreductase.activity	0.0452828	0.104212	0.322813	108
hexose.transmembrane.transport	0.119021	0.137297	0.376035	13
extracellular.exosome	0.0531067	1.57089e-13	3.98693e-11	1809
glucose.transmembrane.transport	0.111935	0.0691464	0.251664	22
cell.differentiation	-0.00771621	0.563164	0.79536	482
multicellular.organism.development	-0.0433929	0.00268375	0.0320283	409
neuron.migration	0.0548778	0.0544533	0.216167	103
axon.guidance	0.0429992	0.03819	0.176229	196
negative.regulation.of.cell.proliferation	0.00671552	0.660751	0.849749	364
olfactory.bulb.development	-0.112273	0.109001	0.330388	17
positive.regulation.of.neuron.differentiation	-0.00949744	0.773338	0.904782	77
positive.regulation.of.transcription..DNA.templated	-0.0644479	3.61623e-07	2.69941e-05	537
O.glycan.processing	-0.00904779	0.818144	0.927931	54
molecular_function	-0.00372399	0.757199	0.895513	596
cellular_component	-0.00324096	0.837684	0.936544	340
nuclear.inner.membrane	-0.0710418	0.120064	0.348741	40
biological_process	-0.0102003	0.447469	0.716967	476
fat.cell.differentiation	-0.0140255	0.691464	0.864217	67
protein.heterooligomerization	0.0435537	0.255511	0.531166	57
signal.transduction	0.00756109	0.441364	0.71198	915
positive.regulation.of.GTPase.activity	0.0495708	0.00311147	0.0358039	302
regulation.of.small.GTPase.mediated.signal.transduction	0.0188683	0.451149	0.719719	134
autophagosome.assembly	0.0539692	0.182529	0.439524	51
autophagosome.membrane	0.0482891	0.394073	0.667959	26
phagocytic.cup	0.0401857	0.504691	0.755846	23
positive.regulation.of.protein.phosphorylation	-0.0694904	0.00471403	0.0479848	139
inflammatory.response	-0.0581625	0.000213295	0.00466675	345
positive.regulation.of.autophagy	-0.012765	0.764574	0.899207	46
positive.regulation.of.peptidyl.threonine.phosphorylation	-0.0238589	0.698467	0.865581	22
protein.kinase.binding	-0.0342764	0.0169386	0.106941	415
phagocytic.vesicle.membrane	0.0165084	0.637939	0.839573	68
protein.destabilization	0.0134792	0.759773	0.896608	43
positive.regulation.of.peptidyl.serine.phosphorylation	-0.0347025	0.280492	0.560525	81
cell.projection	-0.00535461	0.859941	0.943936	91
regulation.of.protein.complex.assembly	-0.0207351	0.78097	0.909778	15
protein.serine.threonine.kinase.activator.activity	-0.0963449	0.0890572	0.290506	26
CARD.domain.binding	-0.0732387	0.342698	0.621057	14
protein.stabilization	-0.00177368	0.938929	0.975841	157
defense.response.to.Gram.negative.bacterium	-0.0810684	0.0208379	0.123122	68
regulation.of.protein.complex.stability	-0.0649513	0.476919	0.740167	10
cellular.response.to.lipopolysaccharide	-0.0798445	0.000991239	0.0155178	143
positive.regulation.of.protein.serine.threonine.kinase.activity	-0.0347322	0.436148	0.70626	42
cellular.response.to.virus	-0.0697655	0.292435	0.574252	19
transcription.by.RNA.polymerase.II	-0.0743101	7.28868e-05	0.00227443	241
intracellular.calcium.activated.chloride.channel.activity	0.143485	0.0469055	0.20134	16
chloride.transport	0.0870804	0.0933646	0.30071	31
phospholipid.scramblase.activity	0.133748	0.143016	0.383832	10
ion.transport	0.100416	0.000877771	0.0140406	92
transmembrane.transporter.activity	0.0736161	0.087583	0.287438	45
transmembrane.transport	0.0435844	0.0178404	0.111347	250
positive.regulation.of.gene.expression	-0.01198	0.457528	0.72515	327
biomineral.tissue.development	0.0879597	0.107201	0.326843	28
regulation.of.actin.cytoskeleton.organization	0.0164147	0.660202	0.849749	60
odontogenesis.of.dentin.containing.tooth	0.0186845	0.625692	0.835185	57
cellular.protein.metabolic.process	0.027895	0.191259	0.450981	185
cell.periphery	0.0114993	0.839173	0.936544	26
endonuclease.activity	-0.0341283	0.478607	0.74188	36
peroxidase.activity	0.118794	0.0439602	0.191046	24
response.to.oxidative.stress	0.0542174	0.0724389	0.259431	92
hydrogen.peroxide.catabolic.process	0.114181	0.0438864	0.191046	26
nucleic.acid.phosphodiester.bond.hydrolysis	-0.126777	0.000503318	0.00925667	63
cellular.oxidant.detoxification	0.10296	0.00311298	0.0358039	69
transferase.activity	-0.0391038	0.334124	0.61645	51
ubiquitin.conjugating.enzyme.activity	-0.0569428	0.344499	0.62253	23
mitochondrial.respiratory.chain.complex.I.assembly	-0.0264561	0.509378	0.761068	52
chromosome	-0.132958	1.47735e-06	9.07138e-05	110
synaptonemal.complex.assembly	-0.179887	0.0082355	0.0694631	18
reciprocal.meiotic.recombination	-0.0691434	0.205406	0.469658	28
spermatogenesis	-0.0850272	4.79281e-08	4.14687e-06	351
positive.regulation.of.apoptotic.process	-0.0149747	0.367173	0.64215	308
cell.division	-0.123023	9.78308e-14	2.6603e-11	311
unsaturated.fatty.acid.biosynthetic.process	0.182481	0.0180718	0.112051	14
long.chain.fatty.acyl.CoA.biosynthetic.process	0.122727	0.0797848	0.272224	17
fibronectin.binding	0.00248339	0.965718	0.985125	25
scavenger.receptor.activity	0.0405227	0.341754	0.621057	46
laminin.binding	-0.0515034	0.403017	0.677321	22
defense.response.to.Gram.positive.bacterium	-0.009114	0.780887	0.909778	78
extracellular.matrix.binding	0.0701006	0.225047	0.492954	25
collagen.containing.extracellular.matrix	0.0795949	1.08031e-06	6.97073e-05	319
sarcoplasmic.reticulum	0.0478042	0.289603	0.571253	41
skeletal.system.development	0.014013	0.582901	0.809306	129
eye.development	0.0318322	0.539639	0.781281	31
podosome	0.0772913	0.149716	0.392409	29
superoxide.metabolic.process	0.0453595	0.493662	0.750847	19
heart.development	-0.0049223	0.821006	0.92968	178
phosphatidylinositol.5.phosphate.binding	0.0147439	0.848514	0.939848	14
extracellular.matrix.disassembly	0.11318	0.00264699	0.0316889	59
phosphatidylinositol.3.phosphate.binding	0.064192	0.188811	0.448147	35
positive.regulation.of.multicellular.organism.growth	0.00316528	0.952957	0.981066	29
SH2.domain.binding	0.0207912	0.670381	0.854655	35
positive.regulation.of.catalytic.activity	-0.0194061	0.569254	0.800326	72
positive.regulation.of.fat.cell.differentiation	-0.0377061	0.361279	0.638065	49
skeletal.system.morphogenesis	-0.00401468	0.940354	0.975987	29
positive.regulation.of.stress.fiber.assembly	-0.0430481	0.323243	0.606799	44
bone.development	-0.00123932	0.978365	0.989805	40
adipose.tissue.development	0.0271299	0.63207	0.839223	26
protein.localization.to.membrane	0.106039	0.119342	0.348149	18
phosphatidylinositol.3.5.bisphosphate.binding	0.0733885	0.195239	0.455439	26
centriole	-0.0762832	0.00377988	0.0417102	121
limb.morphogenesis	0.00432426	0.96039	0.983644	11
ciliary.base	-0.0176515	0.750898	0.892962	27
cellular.response.to.DNA.damage.stimulus	-0.132495	3.15096e-11	4.99821e-09	212
brain.development	0.0449552	0.0315036	0.159064	193
response.to.bacterium	0.00524506	0.868859	0.950357	83
deacetylase.activity	-0.0352357	0.672542	0.856052	12
cytoplasmic.ribonucleoprotein.granule	-0.0740873	0.0510518	0.209208	58
X3..UTR.mediated.mRNA.destabilization	-0.00289006	0.968073	0.986207	16
intracellular.membrane.bounded.organelle	0.021896	0.0666772	0.246686	607
cytoskeletal.protein.binding	0.0857423	0.0113408	0.082237	73
protein.tyrosine.serine.threonine.phosphatase.activity	-0.0381197	0.398415	0.674065	41
peptidyl.tyrosine.dephosphorylation	0.00523512	0.859382	0.943936	96
phosphatidylinositol.phosphorylation	0.0419242	0.315051	0.598802	48
skeletal.muscle.contraction	0.101162	0.0741951	0.262754	26
cell.projection.organization	0.0567094	0.259601	0.535375	33
sarcolemma	0.0850163	0.00533343	0.0523502	90
resolution.of.meiotic.recombination.intermediates	-0.12077	0.105339	0.324453	15
DNA.helicase.activity	-0.11537	0.00569672	0.0543544	48
DNA.duplex.unwinding	-0.127445	0.0001512	0.00363456	74
SNARE.binding	0.128412	0.000648272	0.011117	59
retrograde.vesicle.mediated.transport..Golgi.to.ER	0.0207048	0.535452	0.778337	75
protein.transport	0.0497101	0.00434852	0.0458582	279
signaling.receptor.binding	0.00451641	0.785305	0.911758	309
COP9.signalosome	-0.0966751	0.227449	0.49367	13
positive.regulation.of.T.cell.differentiation.in.thymus	-0.104227	0.253719	0.528975	10
positive.regulation.of.T.cell.receptor.signaling.pathway	-0.115744	0.16502	0.415498	12
mitochondrial.matrix	0.0862878	1.19295e-07	9.6629e-06	320
lysine.catabolic.process	0.229635	0.0119141	0.085418	10
phosphorylation	0.0050068	0.869665	0.950357	90
inner.ear.morphogenesis	0.0816167	0.0380661	0.176191	54
positive.regulation.of.mRNA.splicing..via.spliceosome	-0.047905	0.507044	0.758772	16
double.strand.break.repair	-0.131163	0.000616378	0.0107217	57
spermatid.development	-0.0747158	0.0307119	0.15652	70
oocyte.development	-0.0311624	0.708552	0.869651	12
metaphase.plate.congression	-0.188997	0.0299604	0.153719	11
microtubule.bundle.formation	-0.119775	0.0312316	0.158321	27
photoreceptor.outer.segment	0.0927014	0.0164434	0.105033	56
retina.homeostasis	-0.00611903	0.912371	0.964296	27
photoreceptor.inner.segment	0.0542786	0.212941	0.478353	44
centriolar.satellite	-0.0286183	0.606769	0.822054	27
detection.of.light.stimulus.involved.in.visual.perception	0.170246	0.0123964	0.0877198	18
tRNA.modification	0.0313448	0.572941	0.80368	27
oxidoreductase.activity..acting.on.paired.donors..with.incorporation.or.reduction.of.molecular.oxygen..2.oxoglutarate.as.one.donor..and.incorporation.of.one.atom.each.of.oxygen.into.both.donors	-0.203869	0.00826036	0.0694631	14
in.utero.embryonic.development	-0.0229483	0.272273	0.551352	193
endosome.to.lysosome.transport	0.121263	0.00722478	0.0635213	41
Rab.guanyl.nucleotide.exchange.factor.activity	0.119754	0.0256188	0.139929	29
cellular.protein.catabolic.process	-0.0211858	0.783721	0.911122	14
digestion	0.147668	0.00684252	0.061816	28
enzyme.activator.activity	-0.0558397	0.200074	0.462748	44
lipid.catabolic.process	0.0737332	0.0226729	0.12966	80
negative.regulation.of.neuron.differentiation	0.0293257	0.451987	0.719719	55
Wnt.signaling.pathway	-0.0101693	0.65353	0.847355	164
negative.regulation.of.canonical.Wnt.signaling.pathway	-0.0317532	0.175677	0.431567	153
nervous.system.development	0.0279766	0.116946	0.344592	266
negative.regulation.of.peptidase.activity	0.189248	0.0181424	0.112228	13
peptidase.inhibitor.activity	0.0997231	0.213128	0.478353	13
peroxisome	0.17193	1.02128e-08	1.05081e-06	93
glutathione.peroxidase.activity	0.121712	0.059517	0.22887	20
protein.O.linked.mannosylation	0.0546127	0.495352	0.751915	13
amyloid.beta.binding	0.0356106	0.283319	0.56471	76
trans.Golgi.network	0.0478869	0.0490531	0.20544	142
positive.regulation.of.amyloid.beta.formation	-0.0109311	0.88346	0.953056	15
ribosome.biogenesis	-0.155008	0.0100732	0.0759609	23
early.endosome.membrane	0.0910684	0.000322912	0.00640274	131
regulation.of.phosphatidylinositol.3.kinase.activity	-0.041022	0.558151	0.794051	17
early.endosome.to.late.endosome.transport	0.0361215	0.557543	0.79378	22
carbohydrate.binding	-0.00228849	0.921752	0.968842	155
acrosomal.vesicle	-0.116682	0.000284853	0.00576827	81
binding.of.sperm.to.zona.pellucida	-0.127299	0.0102119	0.0765291	34
cell.migration	-0.0029808	0.883201	0.953056	205
protein.maturation	0.124007	0.0613001	0.233603	19
positive.regulation.of.acrosome.reaction	-0.0862789	0.34475	0.62253	10
hydrolase.activity	0.00282702	0.93484	0.973717	70
kinase.activity	0.0161686	0.635356	0.839573	72
long.term.synaptic.depression	0.0484457	0.502261	0.754521	16
ventricular.septum.development	-0.132021	0.0138717	0.0949809	29
Z.disc	0.116686	9.43169e-06	0.000408028	121
actin.cytoskeleton.organization	0.0241665	0.320598	0.604216	142
cell.cell.junction.organization	0.03076	0.651401	0.845511	18
alpha.actinin.binding	0.0862749	0.218107	0.48416	17
cardiac.muscle.tissue.morphogenesis	0.139241	0.040832	0.182236	18
cell.cortex	0.0549343	0.0386107	0.177615	119
blood.microparticle	0.0317544	0.280079	0.560304	97
lipid.droplet.organization	0.131548	0.0533298	0.214843	18
endosome	0.0349039	0.064622	0.242599	237
polysaccharide.binding	0.0631798	0.367113	0.64215	17
ESCRT.I.complex	0.153614	0.0925302	0.298781	10
endosome.membrane	0.0353227	0.0894205	0.290506	195
endosomal.transport	0.0815556	0.0219927	0.127201	66
macroautophagy	0.0967657	0.00355227	0.040129	76
viral.life.cycle	0.131217	0.0231499	0.130531	25
endosome.transport.via.multivesicular.body.sorting.pathway	0.180819	0.0378301	0.176191	11
multivesicular.body.assembly	0.237488	1.94473e-05	0.000747839	27
viral.budding.via.host.ESCRT.complex	0.213316	0.00172864	0.0229716	18
host.cell	0.0050928	0.900877	0.958803	50
calcium.dependent.protein.binding	0.106291	0.00641073	0.0596715	55
intracellular.transport.of.virus	0.0271617	0.5285	0.772658	45
cilium.movement	-0.192183	0.00111815	0.0170272	24
axoneme	-0.0322045	0.319562	0.602861	80
determination.of.left.right.symmetry	-0.0208755	0.592382	0.814325	55
outer.dynein.arm.assembly	-0.0794558	0.286653	0.567198	15
regulation.of.cilium.assembly	-0.0551752	0.392981	0.666404	20
sensory.perception.of.smell	0.296147	6.50205e-31	2.75037e-28	128
sperm.midpiece	-0.076789	0.246545	0.519135	19
non.motile.cilium	0.0595294	0.302886	0.58473	25
MAPK.cascade	-0.0238049	0.201086	0.464522	244
stimulatory.C.type.lectin.receptor.signaling.pathway	-0.0411743	0.172504	0.426166	92
antigen.processing.and.presentation.of.exogenous.peptide.antigen.via.MHC.class.I..TAP.dependent	0.0572549	0.110527	0.331943	65
threonine.type.endopeptidase.activity	-0.0226613	0.739241	0.886345	18
regulation.of.cellular.amino.acid.metabolic.process	-0.0585639	0.200029	0.462748	40
peptidase.activity	-0.00517717	0.875246	0.952241	77
negative.regulation.of.G2.M.transition.of.mitotic.cell.cycle	-0.0272005	0.541961	0.782577	42
proteasome.core.complex..beta.subunit.complex	0.0109269	0.900132	0.958278	11
anaphase.promoting.complex.dependent.catabolic.process	-0.111634	0.00171708	0.0229716	66
SCF.dependent.proteasomal.ubiquitin.dependent.protein.catabolic.process	-0.0443187	0.176175	0.431567	78
tumor.necrosis.factor.mediated.signaling.pathway	-0.129049	8.32591e-06	0.00036433	100
NIK.NF.kappaB.signaling	-0.103683	0.0120613	0.0861486	49
proteasome.mediated.ubiquitin.dependent.protein.catabolic.process	-0.0478538	0.0419298	0.185564	152
regulation.of.mRNA.stability	-0.0407987	0.167383	0.417583	96
post.translational.protein.modification	-0.0528884	0.00137363	0.0199596	311
Wnt.signaling.pathway..planar.cell.polarity.pathway	-0.00782391	0.81485	0.927059	75
regulation.of.transcription.from.RNA.polymerase.II.promoter.in.response.to.hypoxia	-0.108471	0.00540397	0.0526161	55
interleukin.1.mediated.signaling.pathway	-0.0847682	0.0101521	0.0763812	77
positive.regulation.of.canonical.Wnt.signaling.pathway	-0.00681214	0.79269	0.916226	125
regulation.of.mitotic.cell.cycle.phase.transition	-0.0931602	0.00838709	0.0697154	67
regulation.of.hematopoietic.stem.cell.differentiation	-0.0850411	0.0264063	0.142797	57
ARF.guanyl.nucleotide.exchange.factor.activity	0.0939963	0.167384	0.417583	18
phospholipid.binding	0.112656	9.23727e-05	0.00258576	101
neuron.projection.development	0.0489126	0.0792586	0.272224	108
regulation.of.ARF.protein.signal.transduction	0.116341	0.107128	0.326843	16
cleavage.furrow	0.0145646	0.759194	0.89648	37
ruffle.membrane	0.0859836	0.00787159	0.0679527	80
dendritic.spine	0.0462913	0.0588622	0.227501	140
postsynaptic.density..intracellular.component	0.0982394	0.149025	0.391808	18
chemical.synaptic.transmission	0.124887	6.04649e-11	8.85346e-09	232
nuclear.transcribed.mRNA.poly.A..tail.shortening	0.0877049	0.210574	0.476107	17
negative.regulation.of.translation	-0.00229625	0.94858	0.978922	66
protein.domain.specific.binding	0.0179518	0.361749	0.638065	218
CCR4.NOT.complex	0.163325	0.0606857	0.232425	11
estrogen.receptor.binding	0.0232487	0.619989	0.831164	38
negative.regulation.of.intracellular.estrogen.receptor.signaling.pathway	-0.020107	0.817371	0.927931	11
gene.silencing.by.miRNA	-0.160034	0.0660662	0.245141	11
retinoic.acid.receptor.binding	-0.101958	0.203049	0.46655	13
molecular.adaptor.activity	-0.00979484	0.830293	0.934079	40
positive.regulation.of.nuclear.transcribed.mRNA.poly.A..tail.shortening	-0.0110543	0.898974	0.957849	11
positive.regulation.of.mRNA.catabolic.process	0.0554264	0.524406	0.770956	11
armadillo.repeat.domain.binding	0.0658648	0.470743	0.735184	10
RNA.phosphodiester.bond.hydrolysis..exonucleolytic	0.0653364	0.21553	0.48012	30
positive.regulation.of.nuclear.transcribed.mRNA.catabolic.process..deadenylation.dependent.decay	-0.0513433	0.491134	0.749697	15
regulation.of.stem.cell.population.maintenance	-0.0526277	0.527856	0.772309	12
retina.layer.formation	0.0620484	0.313713	0.597337	22
basolateral.plasma.membrane	0.0380965	0.0727633	0.259531	187
homophilic.cell.adhesion.via.plasma.membrane.adhesion.molecules	0.096494	0.000185795	0.00420589	126
mRNA.binding	-0.0188809	0.461081	0.728053	128
regulation.of.gene.expression	-0.0179098	0.489578	0.748806	125
negative.regulation.of.catalytic.activity	-0.0268643	0.524087	0.770956	47
positive.regulation.of.cytokine.production	-0.134378	0.0226829	0.12966	24
positive.regulation.of.T.cell.proliferation	-0.0977126	0.0100762	0.0759609	58
defense.response.to.protozoan	-0.125856	0.0366769	0.173668	23
positive.regulation.of.T.cell.activation	-0.0538096	0.442408	0.71306	17
endomembrane.system	0.0823574	0.0180408	0.112041	69
cytoplasmic.vesicle	0.0197604	0.305762	0.587286	227
chromatin.binding	-0.0606216	9.09316e-05	0.00256427	355
DNA.replication.initiation	-0.167118	0.00184137	0.0240072	29
cell.cycle	-0.0715752	0.000251267	0.00517066	221
DNA.binding.transcription.activator.activity..RNA.polymerase.II.specific	-0.0672965	2.60747e-06	0.00014598	417
hypothalamus.development	-0.0396962	0.620181	0.831164	13
embryonic.heart.tube.development	-0.0267052	0.729357	0.881573	14
tongue.development	-0.0315377	0.717196	0.874837	11
digestive.tract.development	-0.0909251	0.0797753	0.272224	31
pharyngeal.system.development	-0.00966056	0.890316	0.955118	17
apoptotic.process	-0.0302058	0.0201378	0.120732	509
single.fertilization	-0.0935651	0.0154662	0.101168	56
fusion.of.sperm.to.egg.plasma.membrane.involved.in.single.fertilization	-0.215775	0.00706244	0.0632629	13
sperm.egg.recognition	-0.322132	8.14726e-06	0.000362937	16
signaling.receptor.activity	-0.0364353	0.0869838	0.286886	186
BMP.signaling.pathway	-0.0614361	0.0607847	0.23257	78
NAD.biosynthetic.process	-0.0959592	0.293337	0.575044	10
NADP.binding	0.134115	0.00536291	0.0523502	36
response.to.lipopolysaccharide	-0.0394106	0.121051	0.350985	130
RNA.splicing	-0.057955	0.023136	0.130531	129
male.gonad.development	-0.103872	0.000711158	0.0118058	89
protein.tyrosine.phosphatase.activity	0.00360255	0.90448	0.96049	93
negative.regulation.of.gluconeogenesis	0.0164809	0.825088	0.93208	15
methyltransferase.activity	0.0122375	0.7838	0.911122	42
regulation.of.mitotic.cell.cycle	-0.120545	0.0165601	0.105249	33
cell.surface	-0.0045259	0.71306	0.872027	570
regulation.of.growth	-0.0912472	0.0192742	0.117591	55
response.to.virus	-0.0964961	0.000969804	0.0153197	98
negative.regulation.of.viral.genome.replication	-0.03618	0.458901	0.725815	35
chromatin.organization	-0.0926045	0.00071635	0.0118058	112
mRNA.transport	0.0254063	0.587897	0.812681	38
female.gonad.development	0.0130262	0.856836	0.943853	16
cell.cycle.arrest	-0.0733639	0.00535043	0.0523502	121
cellular.response.to.starvation	0.011764	0.750727	0.892962	61
negative.regulation.of.cell.cycle.arrest	-0.102022	0.123666	0.354619	19
Wnt.protein.binding	0.023639	0.618817	0.830397	37
negative.regulation.of.Wnt.signaling.pathway	0.0662637	0.147072	0.389824	40
positive.regulation.of.protein.oligomerization	0.0477917	0.521601	0.768175	15
suckling.behavior	0.0470994	0.556518	0.793211	13
transcription.factor.complex	-0.0750324	0.000368231	0.00715233	190
central.nervous.system.development	0.0099567	0.689829	0.863963	135
post.embryonic.development	0.013159	0.711703	0.871206	66
multicellular.organism.aging	-0.0750274	0.298771	0.580317	16
multicellular.organism.growth	-0.0290599	0.372092	0.646828	79
nucleosome.assembly	-0.0795013	0.0291343	0.151134	63
lipid.binding	0.081675	0.000934324	0.0148207	138
triglyceride.catabolic.process	0.166057	0.00282211	0.0331598	27
microvillus	0.0686522	0.0706197	0.255544	58
stereocilium	0.0939945	0.0798008	0.272224	29
positive.regulation.of.cell.migration	0.000928257	0.963509	0.984172	205
ion.channel.binding	0.0151735	0.584427	0.810286	109
positive.regulation.of.protein.targeting.to.membrane	-0.0102555	0.867751	0.949835	22
motile.cilium	-0.0910619	0.00462669	0.0474818	81
inner.dynein.arm.assembly	-0.187294	0.0314715	0.159064	11
dynein.complex.binding	-0.078788	0.260716	0.537092	17
cysteine.type.peptidase.activity	-0.00116998	0.983526	0.991075	26
carbohydrate.transport	0.0327335	0.595084	0.814336	22
symporter.activity	0.0634535	0.159823	0.40808	41
SH3.domain.binding	-0.0108605	0.672789	0.856052	127
plasma.membrane.organization	0.0138389	0.85771	0.943853	14
phospholipid.homeostasis	0.14788	0.0894334	0.290506	11
visual.perception	0.0735787	0.000328999	0.00645618	201
response.to.stimulus	0.00326054	0.930412	0.973435	60
protein.containing.complex	-0.00927253	0.468182	0.734991	527
glutathione.biosynthetic.process	0.159318	0.0390131	0.178501	14
phospholipid.biosynthetic.process	0.026566	0.639167	0.839573	26
lyase.activity	0.0296803	0.721823	0.876783	12
collagen.trimer	0.128632	0.000570772	0.0100598	60
protein.homooligomerization	0.0578748	0.00424567	0.0452752	206
fibrillar.center	-0.0943303	0.00028909	0.0058231	124
blastocyst.hatching	0.0102173	0.862446	0.945388	24
stem.cell.differentiation	-0.0294194	0.603605	0.820101	26
dosage.compensation.by.inactivation.of.X.chromosome	-0.19856	0.0296763	0.152879	10
site.of.double.strand.break	-0.0929275	0.0350243	0.168995	43
positive.regulation.of.DNA.repair	-0.13596	0.0144776	0.0975508	27
negative.regulation.of.double.strand.break.repair.via.homologous.recombination	-0.241818	0.00253597	0.0307466	13
embryo.implantation	-0.0124149	0.799378	0.919767	35
neuromuscular.process.controlling.balance	0.0192956	0.661585	0.849749	43
maternal.process.involved.in.female.pregnancy	-0.035103	0.560063	0.794139	23
negative.regulation.of.systemic.arterial.blood.pressure	0.0989767	0.235129	0.50345	12
GTPase.activator.activity	0.0557577	0.00348858	0.0395269	232
negative.regulation.of.Rho.protein.signal.transduction	-0.0923143	0.143067	0.383832	21
activation.of.GTPase.activity	0.0689494	0.0320122	0.159935	81
bone.resorption	0.0153036	0.799451	0.919767	23
muscle.organ.development	0.0129149	0.679029	0.859106	86
integral.component.of.Golgi.membrane	-0.00254214	0.947549	0.978561	56
superoxide.generating.NADPH.oxidase.activity	0.161883	0.0521583	0.212144	12
positive.regulation.of.MAPK.cascade	-0.0408363	0.166992	0.417545	96
positive.regulation.of.interleukin.1.beta.secretion	-0.086333	0.107605	0.327617	29
positive.regulation.of.inflammatory.response	-0.0998065	0.00247283	0.030249	77
positive.regulation.of.calcium.ion.transport	0.0973484	0.0857778	0.284209	26
positive.regulation.of.protein.tyrosine.kinase.activity	0.047992	0.325871	0.609245	35
positive.regulation.of.tumor.necrosis.factor.secretion	-0.0940301	0.167231	0.417583	18
positive.regulation.of.interleukin.6.secretion	-0.0762766	0.162432	0.41169	28
midbody	-0.0412522	0.103312	0.320545	131
spindle.midzone	-0.174361	0.00463967	0.0474818	22
ciliary.transition.zone	-0.0931575	0.12198	0.352551	23
lipoprotein.transport	0.0464069	0.594048	0.814325	11
ATPase.activity..coupled.to.transmembrane.movement.of.substances	0.159705	9.38812e-05	0.0026088	50
proton.transmembrane.transport	0.0199191	0.476829	0.740167	107
response.to.hypoxia	0.0342617	0.138882	0.377779	157
cytoskeleton.organization	0.0193742	0.458379	0.725547	123
regulation.of.cell.morphogenesis	-0.0809676	0.153005	0.39701	26
negative.regulation.of.nucleic.acid.templated.transcription	-0.0888518	0.035115	0.169219	47
positive.regulation.of.gene.silencing.by.miRNA	0.0230221	0.791466	0.916188	11
cartilage.condensation	0.0826131	0.212518	0.478353	19
pattern.specification.process	-0.0106027	0.814302	0.927048	41
regulation.of.cell.differentiation	0.0101762	0.852155	0.941973	28
sodium.ion.transport	0.045448	0.16274	0.411936	79
defense.response	0.0147038	0.679637	0.859106	66
negative.regulation.of.NF.kappaB.transcription.factor.activity	-0.0920065	0.00824567	0.0694631	69
negative.regulation.of.type.I.interferon.production	-0.0499069	0.378422	0.651879	26
cellular.response.to.interferon.beta	-0.14805	0.0471082	0.201507	15
negative.regulation.of.innate.immune.response	-0.0726819	0.403861	0.677321	11
negative.regulation.of.inflammatory.response	0.00833161	0.800533	0.920456	77
cellular.response.to.interferon.gamma	-0.0147814	0.635792	0.839573	86
cellular.response.to.interleukin.1	-0.0458808	0.169679	0.421402	75
cellular.response.to.tumor.necrosis.factor	-0.0364015	0.175967	0.431567	116
positive.regulation.of.reactive.oxygen.species.metabolic.process	-0.030665	0.595617	0.814481	25
spindle.pole	-0.132232	2.88838e-06	0.000159363	105
microtubule.organizing.center	-0.0565009	0.0215782	0.125801	139
positive.regulation.of.neurogenesis	-0.0312201	0.581631	0.808854	26
positive.regulation.of.neural.precursor.cell.proliferation	-0.00571905	0.933053	0.973435	18
bicellular.tight.junction	0.0297516	0.277057	0.556599	112
cerebral.cortex.development	0.033208	0.362143	0.638065	63
apical.junction.complex	0.0427582	0.593464	0.814325	13
membrane.raft	-0.0277469	0.171455	0.424124	205
steroid.biosynthetic.process	-0.0299801	0.611178	0.825101	24
memory	0.0412679	0.213743	0.47894	76
postsynaptic.density	0.0684909	0.000459689	0.00862087	221
ionotropic.glutamate.receptor.binding	0.136879	0.00835312	0.0696979	31
regulation.of.postsynaptic.neurotransmitter.receptor.activity	0.0112813	0.896911	0.957258	11
integral.component.of.postsynaptic.specialization.membrane	0.0941714	0.0965063	0.306422	26
positive.regulation.of.long.term.synaptic.potentiation	0.0628927	0.34258	0.621057	19
positive.regulation.of.nucleic.acid.templated.transcription	-0.0315695	0.347935	0.624506	74
positive.regulation.of.acute.inflammatory.response	-0.113422	0.192697	0.45273	11
regulation.of.cell.adhesion	0.0228844	0.61655	0.829053	40
positive.regulation.of.interleukin.6.production	-0.0730641	0.0684254	0.250704	52
microtubule.severing	-0.0704173	0.418666	0.689249	11
translational.initiation	0.0268446	0.409643	0.68101	79
basement.membrane	0.100491	0.00166484	0.0227171	82
melanosome	0.0533366	0.0756192	0.266065	93
regulation.of.cytosolic.calcium.ion.concentration	0.0782359	0.119884	0.348741	33
calcium.ion.transmembrane.transport	0.0739918	0.00711892	0.0632969	111
transition.metal.ion.binding	0.18704	0.00600845	0.0567597	18
extracellular.matrix.structural.constituent.conferring.tensile.strength	0.175763	9.87538e-05	0.00266635	41
extracellular.matrix	0.0669277	0.000692454	0.0116131	217
cell.morphogenesis	0.0491896	0.11931	0.348149	84
lens.development.in.camera.type.eye	0.141438	0.0022428	0.0283666	39
connexin.complex	0.0471481	0.465422	0.731872	20
cell.communication	0.0720017	0.203815	0.467437	26
bone.mineralization	-0.0202514	0.645941	0.842445	43
regulation.of.bone.mineralization	0.00939036	0.887313	0.954137	19
bone.morphogenesis	-0.00808537	0.87819	0.952968	30
positive.regulation.of.ERK1.and.ERK2.cascade	-0.0283588	0.180506	0.437056	188
cytoplasmic.vesicle.membrane	0.0826327	0.00170676	0.0229716	121
glycolytic.process	0.125793	0.0153568	0.100887	31
thiol.dependent.ubiquitin.specific.protease.activity	-0.0130789	0.699328	0.866084	73
Lys63.specific.deubiquitinase.activity	-0.0534276	0.539472	0.781281	11
protein.K63.linked.deubiquitination	-0.019516	0.735544	0.88455	25
protein.K48.linked.deubiquitination	0.00141686	0.979671	0.990336	27
Lys48.specific.deubiquitinase.activity	-0.00500529	0.954159	0.981446	11
mRNA.cis.splicing..via.spliceosome	0.0506709	0.456709	0.72515	18
motor.activity	0.15373	0.000419329	0.00794222	44
myosin.filament	0.373258	5.57619e-07	3.93122e-05	15
phosphatidylinositol.phosphate.binding	0.0279876	0.737084	0.885757	12
viral.process	-0.0403867	0.0115067	0.0828812	333
regulation.of.alternative.mRNA.splicing..via.spliceosome	-0.0804033	0.0410221	0.18287	54
regulation.of.RNA.splicing	0.0312681	0.560051	0.794139	29
cognition	0.0722004	0.109724	0.33126	41
cochlea.development	0.00716212	0.890238	0.955118	31
nuclear.envelope	0.0153655	0.501555	0.754413	161
regulation.of.glycolytic.process	-0.0258755	0.566501	0.798176	41
mRNA.export.from.nucleus	-0.030102	0.323883	0.6077	90
tRNA.export.from.nucleus	-0.0180462	0.723881	0.87681	32
protein.sumoylation	-0.0894782	0.0165529	0.105249	60
viral.transcription	-0.0167955	0.642269	0.840247	64
nuclear.membrane	-0.0181108	0.365243	0.640479	211
regulation.of.gene.silencing.by.miRNA	0.000668531	0.98776	0.992977	44
regulation.of.cellular.response.to.heat	-0.0206877	0.546822	0.785863	71
transcription..DNA.templated	-0.0643489	0.0330046	0.162968	92
actin.binding	0.0627019	0.000623033	0.0107813	252
late.endosome	0.0670599	0.0151754	0.100475	110
autophagosome	0.0385885	0.297384	0.578803	61
exocytosis	0.108232	0.000762904	0.0124651	81
negative.regulation.of.autophagy	0.00311241	0.943064	0.976189	44
positive.regulation.of.pseudopodium.assembly	-0.104535	0.229914	0.497776	11
regulation.of.protein.ubiquitination	-0.109249	0.156957	0.403559	14
ubiquitin.protein.ligase.binding	-0.0591882	0.00138409	0.0200351	247
Arp2.3.complex.mediated.actin.nucleation	0.00021525	0.997697	0.998221	15
retrograde.transport..endosome.to.Golgi	0.0690503	0.0542804	0.216019	65
alpha.tubulin.binding	-0.0401809	0.446263	0.715337	30
recycling.endosome	0.0474226	0.122217	0.352551	89
recycling.endosome.membrane	0.0966419	0.00459172	0.0473731	72
retrograde.transport..endosome.to.plasma.membrane	0.0331323	0.703557	0.868215	11
serine.type.endopeptidase.inhibitor.activity	0.00624541	0.839603	0.936544	88
chloride.channel.activity	0.0173974	0.679928	0.859106	47
calcium.ion.transport	0.127519	0.000226156	0.00485973	70
metallopeptidase.activity	-0.0285675	0.448007	0.71743	59
zymogen.granule.membrane	0.19253	0.0349999	0.168995	10
cellular.response.to.hypoxia	-0.0500099	0.0782303	0.271984	104
chloride.transmembrane.transport	0.0834455	0.00823085	0.0694631	84
extrinsic.component.of.membrane	0.0855971	0.0188267	0.115789	63
positive.regulation.of.protein.import.into.nucleus	0.0102899	0.840356	0.936544	32
ciliary.membrane	0.0213639	0.601327	0.818763	50
G2.M.transition.of.mitotic.cell.cycle	-0.122857	5.95082e-06	0.000286769	114
regulation.of.G2.M.transition.of.mitotic.cell.cycle	-0.169747	7.65839e-07	5.02681e-05	71
negative.regulation.of.phosphatase.activity	-0.0151032	0.725981	0.878516	45
phosphatase.binding	-0.0565843	0.189163	0.448689	45
ciliary.basal.body.plasma.membrane.docking	-0.133725	2.28905e-05	0.000854353	84
DNA.metabolic.process	-0.186496	0.00246116	0.030249	22
RNA.helicase.activity	0.00404067	0.915987	0.964967	57
nucleobase.containing.compound.metabolic.process	0.0914552	0.0780345	0.271552	31
carbohydrate.metabolic.process	-0.01709	0.532383	0.77595	112
inactivation.of.MAPK.activity	-0.0467711	0.418252	0.689249	25
gamma.aminobutyric.acid.signaling.pathway	-0.00972411	0.871754	0.950664	23
chloride.channel.complex	0.0683795	0.116628	0.344592	44
Notch.signaling.pathway	-0.0147912	0.602467	0.819313	104
intermediate.filament.cytoskeleton	0.0184232	0.690579	0.863963	39
replication.fork.processing	-0.193915	0.00164092	0.0225523	22
positive.regulation.of.protein.ubiquitination	-0.039622	0.280735	0.560525	62
CENP.A.containing.nucleosome.assembly	-0.322279	4.62654e-08	4.0961e-06	24
interstrand.cross.link.repair	-0.224474	6.60255e-07	4.55227e-05	41
kinetochore.assembly	-0.286203	0.00172356	0.0229716	10
protein.folding	0.0427729	0.0975681	0.308727	126
adenylate.cyclase.inhibiting.G.protein.coupled.receptor.signaling.pathway	0.0921459	0.0152408	0.100557	58
apical.plasma.membrane	0.0479737	0.00474584	0.0481798	294
response.to.nicotine	0.0979306	0.0449866	0.194618	35
heart.looping	-0.0556991	0.14243	0.383202	58
embryonic.pattern.specification	-0.165623	0.00860328	0.0704324	21
dorsal.ventral.pattern.formation	0.020815	0.693164	0.864239	30
notochord.development	-0.12204	0.181407	0.438148	10
motile.cilium.assembly	-0.198634	0.00272215	0.032385	19
mitochondrial.membrane	0.0070715	0.818734	0.927931	88
calmodulin.binding	0.0675945	0.00115313	0.0172833	195
positive.regulation.of.vasoconstriction	0.0932607	0.0821814	0.277608	29
protein.methylation	0.0531856	0.410269	0.681157	20
protein.lysine.N.methyltransferase.activity	-0.0433509	0.588354	0.813018	13
spindle	-0.101761	0.000297485	0.00596067	106
centrosome.cycle	-0.185634	7.51559e-05	0.00228895	38
glucose.homeostasis	0.0264072	0.357064	0.633726	102
protein.containing.complex.binding	-0.027841	0.142158	0.383017	235
lateral.element	-0.181359	0.0372612	0.174912	11
DNA.recombination	-0.0830713	0.0286964	0.150134	58
synapsis	-0.183805	0.00869486	0.0707238	17
oogenesis	-0.0874099	0.130334	0.365377	25
spliceosomal.snRNP.assembly	-0.0180627	0.790769	0.916188	18
electron.transfer.activity	0.129133	0.000137086	0.00343347	73
protein.disulfide.oxidoreductase.activity	-0.0474377	0.474079	0.737866	19
electron.transport.chain	0.0839006	0.0175935	0.110525	67
cell.redox.homeostasis	0.00471524	0.89001	0.955118	72
inner.ear.receptor.cell.stereocilium.organization	0.113782	0.127059	0.359638	15
dendrite	0.0636467	1.86556e-05	0.000724715	386
filopodium.assembly	-0.0344024	0.623359	0.833261	17
peroxisomal.matrix	0.196012	1.63617e-06	9.88716e-05	50
protein.targeting.to.peroxisome	0.150748	8.2984e-05	0.00244899	57
fatty.acid.catabolic.process	0.0787246	0.345006	0.62253	12
acyl.CoA.hydrolase.activity	0.0878053	0.272982	0.551908	13
regulation.of.ion.transmembrane.transport	0.05426	0.0494498	0.206647	110
sperm.flagellum	-0.138689	0.00398498	0.0430567	36
positive.regulation.of.dendritic.spine.development	0.0310302	0.639598	0.839573	19
sperm.capacitation	-0.167374	0.0095619	0.0738674	20
sperm.principal.piece	-0.171775	0.00953735	0.0738674	19
cornified.envelope	0.250615	1.9168e-11	3.17272e-09	60
blastocyst.development	-0.204844	0.00455488	0.0472491	16
protein.import.into.nucleus	-0.0102368	0.76086	0.896997	74
negative.regulation.of.gene.expression	-0.0496266	0.022923	0.130057	177
nuclear.import.signal.receptor.activity	-0.042037	0.525847	0.771407	19
protein.C.terminus.binding	-0.0332749	0.130441	0.365407	174
positive.regulation.of.translation	-0.0394028	0.299433	0.580909	58
phosphatidylinositol.4.5.bisphosphate.binding	0.0752159	0.0346484	0.16782	66
phosphatidylinositol.3.4.5.trisphosphate.binding	0.0283185	0.545843	0.78505	38
myosin.complex	0.133799	0.0112044	0.0815589	30
cell.substrate.adhesion	0.00287561	0.966309	0.985464	18
phosphatidylinositol.3.4.bisphosphate.binding	0.110762	0.0389849	0.178501	29
brush.border	0.157947	0.000153663	0.00363456	48
filamentous.actin	0.0734044	0.203944	0.467437	25
stereocilium.tip	0.175839	0.0148822	0.0992358	16
positive.regulation.of.filopodium.assembly	-0.0561085	0.331519	0.614157	25
cell.junction.assembly	0.0393116	0.59808	0.816382	15
establishment.of.epithelial.cell.apical.basal.polarity	-0.0417225	0.616743	0.829053	12
synapse	0.0723161	0.000109686	0.00287983	242
negative.regulation.of.BMP.signaling.pathway	-0.0653857	0.129192	0.363512	45
AMPA.glutamate.receptor.complex	0.0396611	0.492457	0.750792	25
histone.demethylase.activity..H3.K9.specific.	-0.196941	0.0181592	0.112228	12
histone.H3.K9.demethylation	-0.164628	0.0398479	0.179528	13
dioxygenase.activity	-0.0456724	0.448323	0.71743	23
male.meiosis.I	0.0163709	0.790386	0.916188	22
negative.regulation.of.transposition	0.0214337	0.766589	0.90066	16
positive.regulation.of.transcription.elongation.from.RNA.polymerase.II.promoter	-0.138961	0.0542914	0.216019	16
positive.regulation.of.macroautophagy	-0.0364193	0.469076	0.735184	33
negative.regulation.of.TOR.signaling	0.0253029	0.643078	0.840453	28
axon.initial.segment	0.124616	0.0536924	0.215402	20
apicolateral.plasma.membrane	0.0393908	0.597343	0.815961	15
PDZ.domain.binding	0.0469044	0.147144	0.389824	80
dendritic.spine.membrane	0.113762	0.172376	0.426128	12
regulation.of.short.term.neuronal.synaptic.plasticity	0.0595209	0.457422	0.72515	13
glutamatergic.synapse	0.0713146	1.45487e-05	0.000583021	314
integral.component.of.postsynaptic.density.membrane	0.125135	0.00332698	0.0379216	46
formation.of.cytoplasmic.translation.initiation.complex	0.112357	0.131891	0.367575	15
eukaryotic.43S.preinitiation.complex	0.116844	0.130082	0.36494	14
eukaryotic.48S.preinitiation.complex	0.113169	0.142602	0.383393	14
specific.granule.membrane	0.028998	0.361338	0.638065	83
neutrophil.degranulation	0.0520207	0.00022649	0.00485973	430
tertiary.granule.membrane	0.0247027	0.497842	0.752484	63
inward.rectifier.potassium.channel.activity	0.0322393	0.635825	0.839573	18
inorganic.anion.transport	0.061938	0.303837	0.585971	23
Golgi.associated.vesicle.membrane	0.144669	0.03359	0.164538	18
Golgi.cisterna.membrane	0.0484413	0.13679	0.375986	79
positive.regulation.of.I.kappaB.kinase.NF.kappaB.signaling	-0.0847356	0.000153707	0.00363456	168
protein.phosphatase.binding	0.0157948	0.621157	0.831779	82
positive.regulation.of.glycogen.biosynthetic.process	-0.0203847	0.777704	0.907824	16
mitochondrion.organization	0.0127154	0.701649	0.867785	76
lysosomal.membrane	0.0569776	0.00135238	0.019802	268
mechanosensitive.ion.channel.activity	0.214538	0.0137414	0.0945993	11
cellular.response.to.mechanical.stimulus	-0.0745317	0.025696	0.14015	75
protein.targeting.to.lysosome	0.0868483	0.215063	0.479922	17
endosome.organization	0.0107675	0.828005	0.932586	34
adherens.junction	-0.0039823	0.916478	0.965154	58
mannosyltransferase.activity	0.00341712	0.957808	0.982586	20
mannosylation	0.00297051	0.972785	0.986928	11
negative.regulation.of.Ras.protein.signal.transduction	0.0323857	0.560267	0.794139	27
cellular.response.to.calcium.ion	0.116139	0.000331253	0.00646707	80
cytoplasmic.stress.granule	-0.0106739	0.780502	0.909778	57
regulation.of.epithelial.to.mesenchymal.transition	0.177029	0.0337116	0.164538	12
estradiol.17.beta.dehydrogenase.activity	0.00648362	0.940641	0.975987	11
estrogen.biosynthetic.process	0.0232334	0.771769	0.904527	13
retinol.metabolic.process	0.158473	0.000616772	0.0107217	39
NADP.retinol.dehydrogenase.activity	0.00917479	0.91997	0.968028	10
transcription.coactivator.activity	-0.0445128	0.0143741	0.0973025	256
regulation.of.DNA.replication	-0.269394	0.000120256	0.00311439	17
folic.acid.binding	0.0497954	0.567392	0.798839	11
nuclear.speck	-0.0546149	0.000422187	0.00795677	355
establishment.of.mitotic.spindle.orientation	-0.0863973	0.113583	0.33835	28
damaged.DNA.binding	-0.114891	0.00381965	0.0417857	53
mitochondrial.electron.transport..NADH.to.ubiquinone	0.054952	0.235091	0.50345	39
NADH.dehydrogenase..ubiquinone..activity	0.0335328	0.480336	0.74335	37
immune.response	-0.0794059	4.00641e-06	0.000211839	286
antigen.processing.and.presentation	0.0025016	0.971513	0.986928	17
epithelial.to.mesenchymal.transition	-0.0103975	0.826779	0.93233	37
transcription.factor.binding	-0.0348038	0.0357962	0.170986	309
MyD88.dependent.toll.like.receptor.signaling.pathway	-0.196539	0.000249246	0.00515696	29
toll.like.receptor.9.signaling.pathway	-0.205914	0.00434788	0.0458582	16
sulfotransferase.activity	0.0352777	0.489814	0.748806	32
RNA.phosphodiester.bond.hydrolysis..endonucleolytic	-0.0491036	0.212075	0.4783	54
pyridoxal.phosphate.binding	0.1255	0.00358821	0.0403121	45
intracellular.protein.transport	0.0613463	0.000675605	0.0113807	260
vesicle.mediated.transport	0.1048	0.00010473	0.00278817	115
platelet.aggregation	0.0433999	0.342286	0.621057	40
regulation.of.apoptotic.process	-0.00994638	0.644817	0.841556	181
guanyl.nucleotide.exchange.factor.activity	0.0512098	0.102843	0.319612	85
mitotic.cytokinesis	-0.107087	0.0102807	0.0767425	48
skeletal.muscle.fiber.development	0.0134765	0.834726	0.935201	20
anchored.component.of.membrane	-0.055091	0.067957	0.249964	92
regulation.of.autophagy	0.0197234	0.594297	0.814325	61
protein.serine.threonine.kinase.activity	-0.00113284	0.943577	0.976406	332
Cul3.RING.ubiquitin.ligase.complex	0.0200213	0.704302	0.868852	30
nucleotide.binding	0.0758089	0.0497882	0.207605	56
DNA.templated.transcription..initiation	-0.129595	0.0931571	0.30055	14
unfolded.protein.binding	-0.000260695	0.992468	0.995607	110
negative.regulation.of.actin.filament.polymerization	0.0673739	0.400269	0.675454	13
regulation.of.protein.stability	-0.070311	0.0405786	0.181958	71
negative.regulation.of.proteasomal.ubiquitin.dependent.protein.catabolic.process	0.00745121	0.893397	0.955562	27
non.motile.cilium.assembly	-0.00589256	0.896142	0.956706	41
immune.system.process	0.00750795	0.888714	0.954801	29
nuclear.transcribed.mRNA.catabolic.process..nonsense.mediated.decay	-0.0146399	0.678689	0.859106	67
NAD..kinase.activity	-0.168275	0.0197809	0.119707	16
regulation.of.cell.proliferation	-0.0108897	0.664821	0.850368	133
regulation.of.cell.cycle	-0.0667569	0.0166084	0.10538	108
mitochondrial.outer.membrane	0.0510783	0.0391773	0.178501	137
protein.transmembrane.transporter.activity	0.0137393	0.880404	0.953056	10
protein.import.into.mitochondrial.matrix	-0.0682218	0.376776	0.650516	14
gluconeogenesis	0.183661	2.5042e-05	0.000925581	44
cytokine.activity	-0.0922443	4.67004e-05	0.0015874	164
steroid.hormone.receptor.activity	0.0335999	0.406595	0.677718	51
steroid.hormone.mediated.signaling.pathway	0.0387584	0.33841	0.621011	51
mitotic.spindle	-0.119671	0.0010235	0.0158393	63
Flemming.body	0.00326227	0.955883	0.98163	24
growth.factor.activity	-0.0373614	0.111079	0.332975	153
axonemal.dynein.complex.assembly	-0.232132	0.0110213	0.0813142	10
lysosome	0.0268366	0.1661	0.416834	225
erythrocyte.differentiation	-0.117517	0.00923252	0.0729216	41
peroxisomal.membrane	0.146064	0.000235505	0.00500876	53
lipid.biosynthetic.process	0.218704	0.0120115	0.0859546	11
FAD.binding	0.0364292	0.482718	0.745006	31
integral.component.of.endoplasmic.reticulum.membrane	0.0482152	0.095896	0.30524	100
microtubule.cytoskeleton.organization	-0.0436211	0.137863	0.376585	97
microtubule.based.movement	-0.0251145	0.443374	0.713107	78
microtubule.depolymerization	-0.0158128	0.83207	0.934915	15
mitotic.spindle.organization	-0.16272	0.000519263	0.0094135	38
antigen.processing.and.presentation.of.exogenous.peptide.antigen.via.MHC.class.II	0.029158	0.352996	0.628264	85
regulation.of.cell.migration	0.00610303	0.857943	0.943853	72
mitotic.spindle.assembly	-0.0957447	0.0910665	0.295055	26
regulation.of.cell.growth	0.0112887	0.756726	0.895395	63
protein.serine.threonine.tyrosine.kinase.activity	-0.0489257	0.36184	0.638065	29
calcium.channel.regulator.activity	0.049169	0.343428	0.621402	31
long.term.memory	-0.0100289	0.844354	0.937547	32
regulation.of.blood.pressure	0.0599119	0.108578	0.329763	60
potassium.channel.regulator.activity	0.0920708	0.059454	0.228859	35
sodium.channel.regulator.activity	-0.0104865	0.847702	0.939779	28
regulation.of.DNA.binding.transcription.factor.activity	-0.0589838	0.317201	0.601088	24
nucleotide.biosynthetic.process	-0.00853243	0.915166	0.964967	13
pyrimidine.nucleoside.salvage	0.0400487	0.660977	0.849749	10
DNA.biosynthetic.process	-0.073177	0.214639	0.479922	24
ossification	0.00284419	0.933981	0.973435	71
release.of.cytochrome.c.from.mitochondria	-0.00894242	0.884557	0.953458	22
neuroblast.proliferation	-0.120653	0.0947299	0.303822	16
learning.or.memory	0.0139225	0.725937	0.878516	53
B.cell.differentiation	-0.0665421	0.0543043	0.216019	70
positive.regulation.of.bone.mineralization	0.0605977	0.214782	0.479922	35
filopodium.membrane	-0.0254533	0.716346	0.87408	17
Wnt.activated.receptor.activity	-0.0274657	0.695004	0.864239	17
negative.regulation.of.neuron.apoptotic.process	-0.0239193	0.34307	0.621057	132
negative.regulation.of.necroptotic.process	-0.120927	0.146906	0.389736	12
postsynapse	0.0157718	0.641394	0.840027	73
regulation.of.postsynaptic.cytosolic.calcium.ion.concentration	0.0693792	0.425559	0.697418	11
mRNA.splicing..via.spliceosome	-0.0651559	0.00274577	0.0325644	178
RNA.export.from.nucleus	-0.0856359	0.0795867	0.272224	35
mRNA.3..end.processing	-0.0834758	0.045454	0.196417	48
cell.cell.adherens.junction	0.111912	0.000152369	0.00363456	96
focal.adhesion	0.0321426	0.040731	0.182123	345
cell.cell.adhesion	0.0665195	0.00644267	0.059677	141
cadherin.binding.involved.in.cell.cell.adhesion	0.227723	0.001151	0.0172833	17
fatty.acyl.CoA.binding	0.174108	0.00860463	0.0704324	19
acyl.CoA.metabolic.process	0.24127	2.06107e-05	0.000776881	26
coenzyme.A.biosynthetic.process	0.118648	0.193845	0.454134	10
palmitoyl.CoA.hydrolase.activity	0.267004	0.0013611	0.0198532	12
carboxylic.ester.hydrolase.activity	0.0855775	0.11705	0.344632	28
microfilament.motor.activity	0.262492	7.45941e-05	0.00228895	19
nuclear.pore	0.0389625	0.296702	0.578364	60
protein.targeting	0.0342542	0.495906	0.752157	33
protein.targeting.to.membrane	0.043847	0.314345	0.598056	44
basal.plasma.membrane	0.0233918	0.647008	0.843227	32
lateral.plasma.membrane	0.0570704	0.150748	0.393621	53
Ral.GTPase.binding	0.0342951	0.693672	0.864239	11
positive.regulation.of.actin.filament.polymerization	0.0702906	0.0991289	0.311887	46
actin.dependent.ATPase.activity	0.231629	0.011196	0.0815589	10
phagocytic.vesicle	0.0671308	0.0880066	0.28858	54
positive.regulation.of.gene.expression..epigenetic	-0.144207	0.00826551	0.0694631	28
regulation.of.bicellular.tight.junction.assembly	0.104898	0.190324	0.450131	13
post.Golgi.vesicle.mediated.transport	0.127271	0.0615647	0.234377	18
syntaxin.binding	0.0591947	0.139865	0.378978	52
SNARE.complex	0.146098	0.00105441	0.016186	42
specific.granule	0.242542	0.00246134	0.030249	13
mast.cell.granule	-0.0409764	0.515664	0.766025	21
neuron.projection	0.0726742	1.82872e-05	0.000717727	295
membrane.fusion	0.125848	0.0153128	0.100858	31
presynapse	0.081613	0.00933106	0.0732344	85
mitochondrial.intermembrane.space	0.0472501	0.168772	0.420494	71
positive.regulation.of.phosphatidylinositol.3.kinase.signaling	-0.0664287	0.0388409	0.178295	81
regulation.of.actin.filament.polymerization	0.108418	0.0854465	0.283358	21
protein.N.terminus.binding	-0.00579736	0.842098	0.93697	99
positive.regulation.of.peptidyl.tyrosine.phosphorylation	-0.028947	0.342794	0.621057	90
positive.regulation.of.protein.kinase.B.signaling	-0.0557551	0.0153703	0.100887	159
cellular.response.to.cytokine.stimulus	-0.0435603	0.291575	0.573657	49
regulation.of.autophagy.of.mitochondrion	-0.056657	0.418641	0.689249	17
positive.regulation.of.actin.cytoskeleton.reorganization	0.0705209	0.300276	0.581756	18
DNA.repair	-0.149081	3.42515e-13	8.14972e-11	201
extrinsic.apoptotic.signaling.pathway.in.absence.of.ligand	-0.0310589	0.556032	0.792814	30
sodium.potassium.exchanging.ATPase.complex	-0.233308	0.00737269	0.0646623	11
caveola	-0.0508555	0.166208	0.416834	62
potassium.ion.transport	0.072663	0.0397744	0.179528	67
muscle.contraction	0.180023	3.41935e-10	4.33916e-08	102
regulation.of.heart.contraction	-0.0333181	0.527668	0.772309	30
intercalated.disc	0.0623314	0.148059	0.391159	45
T.tubule	0.041841	0.348194	0.624506	42
regulation.of.cardiac.conduction	0.0201841	0.628602	0.836881	48
regulation.of.sodium.ion.transmembrane.transporter.activity	-0.0633805	0.365593	0.640798	17
peptidyl.prolyl.cis.trans.isomerase.activity	0.032874	0.533185	0.776471	30
protein.targeting.to.mitochondrion	0.0523594	0.355439	0.63143	26
regulation.of.protein.kinase.A.signaling	-0.172383	0.0477247	0.203458	11
interleukin.12.mediated.signaling.pathway	0.0234899	0.60281	0.819313	41
positive.regulation.of.endothelial.cell.proliferation	-0.0256544	0.461347	0.728121	69
chemotaxis	-0.0675908	0.0143896	0.0973025	110
cell.cell.signaling	-0.0317789	0.115535	0.34229	207
chemokine.activity	-0.100368	0.0212724	0.124976	44
regulation.of.cell.shape	0.0315889	0.203801	0.467437	136
positive.regulation.of.angiogenesis	-0.0593704	0.0236278	0.131893	122
receptor.ligand.activity	-0.14096	0.00983579	0.0751905	28
eosinophil.chemotaxis	-0.0937609	0.157099	0.403559	19
cytoplasmic.exosome..RNase.complex.	0.176459	0.0427019	0.187504	11
GTP.metabolic.process	0.025821	0.766809	0.90066	11
potassium.channel.activity	0.0714611	0.216175	0.48074	25
voltage.gated.potassium.channel.complex	0.105382	0.00230644	0.0290435	70
potassium.ion.leak.channel.activity	-0.0329559	0.648093	0.843518	16
brush.border.membrane	0.0305043	0.455644	0.724274	50
cardiac.conduction	0.0651793	0.139246	0.378089	43
female.pregnancy	-0.00666102	0.83294	0.935201	84
negative.regulation.of.interferon.gamma.production	-0.0869171	0.12503	0.357348	26
negative.regulation.of.tumor.necrosis.factor.production	-0.00198013	0.96335	0.984172	45
positive.regulation.of.interleukin.4.production	-0.173988	0.00577782	0.0548532	21
negative.regulation.of.activated.T.cell.proliferation	-0.0982481	0.259162	0.53505	11
positive.regulation.of.NF.kappaB.transcription.factor.activity	-0.0784604	0.00141913	0.0204645	139
ERK1.and.ERK2.cascade	-0.136084	0.0163168	0.104917	26
response.to.interleukin.1	-0.0417181	0.414109	0.683954	32
positive.regulation.of.NIK.NF.kappaB.signaling	-0.166231	1.42604e-05	0.000577545	57
positive.regulation.of.interleukin.8.secretion	-0.143757	0.053885	0.21571	15
cellular.glucose.homeostasis	0.0100671	0.879253	0.953056	19
vesicle.docking.involved.in.exocytosis	0.0103722	0.849342	0.939955	28
syntaxin.1.binding	0.122703	0.0374567	0.175324	24
insulin.secretion	0.102312	0.0486771	0.204766	31
platelet.alpha.granule	0.0252563	0.74351	0.889372	14
response.to.insulin	0.0418178	0.247438	0.520483	64
negative.regulation.of.glucose.import	-0.044662	0.624782	0.834285	10
complement.activation..lectin.pathway	0.063919	0.48395	0.745006	10
Golgi.to.endosome.transport	0.0819754	0.346458	0.62333	11
protein.localization	0.0121276	0.725791	0.878516	70
endosome.lumen	-0.059113	0.412975	0.683563	16
trans.Golgi.network.membrane	0.108883	0.000564822	0.010048	84
intracellular	0.0123179	0.712364	0.871535	75
calcium.dependent.cell.cell.adhesion.via.plasma.membrane.cell.adhesion.molecules	0.0703476	0.106473	0.326357	44
platelet.degranulation	0.0233344	0.383648	0.657017	117
Golgi.stack	0.0266696	0.607333	0.822307	31
GDP.binding	0.0294689	0.453917	0.722133	54
trans.Golgi.network.transport.vesicle	0.0484088	0.530552	0.773875	14
myosin.V.binding	0.153201	0.078492	0.272224	11
multivesicular.body.membrane	0.0760414	0.405007	0.677321	10
positive.regulation.of.exocytosis	0.144912	0.0215128	0.125801	21
synaptic.vesicle.endocytosis	0.129647	0.00995848	0.0756618	33
anchored.component.of.synaptic.vesicle.membrane	0.0439482	0.598076	0.816382	12
axon.cytoplasm	0.0937607	0.0205671	0.122508	51
positive.regulation.of.release.of.cytochrome.c.from.mitochondria	0.06898	0.206478	0.471826	28
blood.coagulation	-0.0251823	0.275187	0.55398	158
anterograde.axonal.transport	0.158302	0.00441321	0.0464118	27
clathrin.coated.vesicle.membrane	0.032421	0.418764	0.689249	52
GTP.dependent.protein.binding	-0.00710989	0.908095	0.962553	22
melanosome.organization	0.130531	0.0551999	0.217768	18
anterograde.synaptic.vesicle.transport	0.178909	0.0255078	0.139523	13
steroid.metabolic.process	0.189262	5.42015e-05	0.00177884	38
cholesterol.metabolic.process	0.0343435	0.331155	0.614157	67
cholesterol.binding	0.0578894	0.161033	0.409248	49
X3..phosphoadenosine.5..phosphosulfate.metabolic.process	0.135121	0.0471755	0.201568	18
activation.of.MAPK.activity	-0.0294616	0.28391	0.565058	111
lipopolysaccharide.binding	-0.0198157	0.698078	0.865581	32
toll.like.receptor.signaling.pathway	-0.0838241	0.0633211	0.238913	41
MyD88.independent.toll.like.receptor.signaling.pathway	-0.204947	0.0105065	0.0779695	13
phagocytosis	-0.0101879	0.805166	0.922315	49
I.kappaB.kinase.NF.kappaB.signaling	-0.172192	5.77229e-06	0.000281732	58
I.kappaB.phosphorylation	-0.215092	0.00987778	0.0753044	12
external.side.of.plasma.membrane	-0.0878849	7.34429e-07	4.90521e-05	269
astrocyte.development	0.0166932	0.828777	0.932926	14
positive.regulation.of.B.cell.proliferation	-0.105544	0.0193831	0.118067	41
intrinsic.component.of.plasma.membrane	-0.00699189	0.884585	0.953458	36
lipopolysaccharide.mediated.signaling.pathway	-0.13307	0.00816124	0.0694631	33
negative.regulation.of.interleukin.17.production	-0.200131	0.0215338	0.125801	11
negative.regulation.of.interleukin.6.production	-0.0437414	0.423082	0.694256	28
positive.regulation.of.chemokine.production	-0.238632	0.000316916	0.00631675	19
positive.regulation.of.interferon.alpha.production	-0.056097	0.501013	0.754024	12
positive.regulation.of.interferon.beta.production	-0.0667309	0.238903	0.50702	26
positive.regulation.of.interferon.gamma.production	-0.179965	4.45472e-05	0.00152785	43
positive.regulation.of.interleukin.10.production	-0.174153	0.00383858	0.0418724	23
positive.regulation.of.interleukin.12.production	-0.132265	0.0281106	0.148635	23
positive.regulation.of.interleukin.8.production	-0.168177	0.00248954	0.0302801	27
positive.regulation.of.tumor.necrosis.factor.production	-0.0497168	0.238405	0.506536	47
toll.like.receptor.4.signaling.pathway	-0.135408	0.0793814	0.272224	14
TRIF.dependent.toll.like.receptor.signaling.pathway	-0.171027	0.00548787	0.052892	22
macrophage.activation	-0.192537	0.0270165	0.144862	11
positive.regulation.of.tumor.necrosis.factor.biosynthetic.process	-0.0643053	0.319456	0.602861	20
positive.regulation.of.macrophage.activation	-0.0820089	0.256057	0.531166	16
receptor.complex	-0.03308	0.110791	0.332373	196
positive.regulation.of.MHC.class.II.biosynthetic.process	-0.133767	0.142962	0.383832	10
positive.regulation.of.interleukin.8.biosynthetic.process	-0.164418	0.0485826	0.204595	12
positive.regulation.of.nitric.oxide.biosynthetic.process	-0.0570424	0.223739	0.491786	38
negative.regulation.of.osteoclast.differentiation	-0.0302929	0.622821	0.832834	22
positive.regulation.of.JNK.cascade	0.00595905	0.855682	0.943853	78
positive.regulation.of.nitric.oxide.synthase.biosynthetic.process	-0.259527	0.000500998	0.00925667	15
necroptotic.process	-0.168257	0.0111146	0.0814612	19
negative.regulation.of.ERK1.and.ERK2.cascade	0.0662736	0.0711947	0.256665	62
cellular.response.to.lipoteichoic.acid	-0.136315	0.1355	0.372992	10
apoptotic.signaling.pathway	-0.0927347	0.0164047	0.104963	56
negative.regulation.of.cold.induced.thermogenesis	0.0201117	0.637039	0.839573	46
cellular.response.to.oxidised.low.density.lipoprotein.particle.stimulus	-0.197728	0.0303662	0.154965	10
positive.regulation.of.cytokine.production.involved.in.inflammatory.response	-0.0977097	0.151229	0.394606	18
positive.regulation.of.reactive.oxygen.species.biosynthetic.process	0.0216382	0.812691	0.925768	10
cellular.response.to.amyloid.beta	-0.0244491	0.616717	0.829053	35
lamellipodium.assembly	0.00781726	0.878373	0.952968	32
positive.regulation.of.cell.adhesion	-0.0252031	0.563042	0.79536	44
focal.adhesion.assembly	-0.0400932	0.470872	0.735184	27
actin.filament.bundle.assembly	0.0564942	0.240841	0.510228	36
regulation.of.focal.adhesion.assembly	-0.0933785	0.170193	0.422376	18
regulation.of.actin.cytoskeleton.reorganization	-0.0317149	0.632228	0.839223	19
response.to.iron.ion	-0.0650016	0.339693	0.621057	18
positive.regulation.of.neuron.projection.development	0.0164762	0.583117	0.809306	93
negative.regulation.of.cell.growth	-0.0402399	0.141525	0.382117	112
histone.binding	-0.0927201	0.000481269	0.00898134	119
presynaptic.membrane	0.0867096	0.0134466	0.0929063	68
neuronal.cell.body	0.0575271	0.000260333	0.00532843	343
histone.H4.acetylation	-0.0957041	0.0651721	0.242769	31
tau.protein.binding	0.053899	0.226876	0.49367	42
positive.regulation.of.protein.secretion	0.0485402	0.276464	0.555701	42
proline.rich.region.binding	-0.03799	0.587606	0.812574	17
integrin.binding	0.0180364	0.488251	0.74849	124
mitochondrial.respiratory.chain.complex.I	0.0224826	0.627122	0.836042	39
X4.iron..4.sulfur.cluster.binding	0.0329431	0.471004	0.735184	40
extracellular.matrix.assembly	-0.0187363	0.837434	0.936544	10
protease.binding	0.00202401	0.944831	0.977172	98
activation.of.cysteine.type.endopeptidase.activity.involved.in.apoptotic.process	-0.0941071	0.00514326	0.0512492	74
activation.of.NF.kappaB.inducing.kinase.activity	-0.138104	0.0425066	0.186862	18
extrinsic.apoptotic.signaling.pathway.via.death.domain.receptors	-0.0489068	0.362026	0.638065	29
extrinsic.apoptotic.signaling.pathway	-0.207629	7.24955e-06	0.000336574	39
regulation.of.extrinsic.apoptotic.signaling.pathway.via.death.domain.receptors	-0.21273	0.00239167	0.0298528	17
negative.regulation.of.extrinsic.apoptotic.signaling.pathway.via.death.domain.receptors	-0.136636	0.00515588	0.0512492	35
cytoplasmic.sequestering.of.transcription.factor	-0.14025	0.107231	0.326843	11
glutamate.receptor.activity	0.200768	0.0054278	0.052622	16
G.protein.coupled.receptor.binding	0.0563275	0.125163	0.35746	62
neuropeptide.hormone.activity	0.102726	0.0754271	0.265635	25
proteasome.complex	-0.0782672	0.0792946	0.272224	42
proteasome.accessory.complex	-0.0806821	0.376949	0.650519	10
secretory.granule.lumen	0.0407963	0.154792	0.400063	102
ficolin.1.rich.granule.lumen	0.0615665	0.0271725	0.145394	108
positive.regulation.of.insulin.secretion	0.0168604	0.722695	0.876783	37
bHLH.transcription.factor.binding	-0.166684	0.00680167	0.061816	22
negative.regulation.of.insulin.secretion	0.126663	0.0227275	0.12972	27
endoplasmic.reticulum.quality.control.compartment	0.0533914	0.385997	0.658079	22
endoplasmic.reticulum.mannose.trimming	0.073362	0.359719	0.636657	13
chondrocyte.development	0.122238	0.0809931	0.274813	17
proteoglycan.biosynthetic.process	0.0881249	0.195521	0.455539	18
retinal.ganglion.cell.axon.guidance	0.0851907	0.223947	0.491959	17
positive.regulation.of.chondrocyte.differentiation	0.0482026	0.466981	0.73402	19
positive.regulation.of.cell.differentiation	-0.107561	0.0324984	0.161306	33
positive.regulation.of.osteoblast.differentiation	-0.0070393	0.854189	0.942852	57
SMAD.binding	-0.0427832	0.305238	0.587186	48
retina.development.in.camera.type.eye	0.0741315	0.0529456	0.21438	57
positive.regulation.of.cartilage.development	0.0647558	0.385193	0.657592	15
cellular.response.to.BMP.stimulus	0.0540567	0.289952	0.571646	32
positive.regulation.of.extrinsic.apoptotic.signaling.pathway.via.death.domain.receptors	0.0633861	0.487602	0.748207	10
secretory.granule.membrane	0.0377263	0.221468	0.488277	88
copper.ion.binding	0.00722064	0.857089	0.943853	52
copper.ion.transport	0.0756361	0.327131	0.609245	14
ATPase.binding	-0.019884	0.562508	0.795309	71
Golgi.lumen	0.00370819	0.903808	0.960312	89
neuropeptide.signaling.pathway	0.154298	6.39327e-08	5.40871e-06	103
circadian.rhythm	0.0120432	0.718503	0.875403	75
feeding.behavior	0.0154793	0.784703	0.911698	26
adult.feeding.behavior	0.110268	0.227232	0.49367	10
hormone.mediated.signaling.pathway	0.0176021	0.682933	0.860537	45
eating.behavior	0.142085	0.0159778	0.103272	24
phosphatidylinositol.phospholipase.C.activity	0.0550558	0.33121	0.614157	26
response.to.wounding	-0.0379412	0.313596	0.597337	59
platelet.activation	-0.00668372	0.82106	0.92968	96
mitotic.cell.cycle	-0.0919903	0.000533209	0.0096205	119
nuclear.chromosome..telomeric.region	-0.0916623	0.00575104	0.0547355	76
chromatin	-0.148264	1.77289e-06	0.000105459	87
nuclear.chromatin	-0.0600476	0.00362363	0.040455	198
negative.regulation.of.protein.phosphorylation	-0.0573554	0.102059	0.317693	68
osteoblast.development	0.00399267	0.953234	0.981066	18
double.stranded.DNA.binding	-0.0622492	0.0543593	0.216019	80
endoplasmic.reticulum.lumen	0.0333378	0.0516725	0.210844	289
response.to.UV	-0.00102906	0.983193	0.991075	35
response.to.gamma.radiation	-0.111943	0.0481914	0.204176	26
negative.regulation.of.cell.substrate.adhesion	0.0483829	0.502816	0.754521	16
nuclear.matrix	-0.114181	0.000102782	0.00275558	97
positive.regulation.of.transforming.growth.factor.beta.receptor.signaling.pathway	-0.0431274	0.429621	0.700158	28
protein.binding..bridging	0.0653045	0.0537957	0.215579	73
positive.regulation.of.protein.binding	0.0186581	0.61149	0.825101	62
histone.lysine.methylation	-0.00101324	0.990715	0.994372	11
histone.methyltransferase.complex	-0.104817	0.0469349	0.20134	30
negative.regulation.of.DNA.binding.transcription.factor.activity	-0.0522493	0.142261	0.383017	66
transcription.regulatory.region.DNA.binding	-0.0795301	0.00012131	0.00312044	197
negative.regulation.of.osteoblast.differentiation	0.0288888	0.527301	0.772309	40
negative.regulation.of.cyclin.dependent.protein.serine.threonine.kinase.activity	-0.103951	0.0526958	0.213645	29
negative.regulation.of.cell.cycle	0.0596187	0.215807	0.480454	36
negative.regulation.of.JNK.cascade	0.0220029	0.709061	0.869651	24
decidualization	-0.0729702	0.236098	0.504915	22
negative.regulation.of.epithelial.cell.proliferation	-0.0444093	0.246292	0.51889	57
R.SMAD.binding	-0.0813897	0.196649	0.45668	21
cellular.response.to.glucose.stimulus	0.086787	0.0288825	0.150418	53
cellular.response.to.peptide.hormone.stimulus	0.00473062	0.944603	0.977172	18
response.to.transforming.growth.factor.beta	-0.0348173	0.702998	0.867933	10
beta.catenin.TCF.complex.assembly	-0.019881	0.710982	0.870885	29
single.stranded.RNA.binding	-0.0257904	0.577355	0.806602	39
SUMO.transferase.activity	-0.189645	0.0140119	0.0953461	14
PcG.protein.complex	-0.0800153	0.227251	0.49367	19
SUMO.binding	-0.095668	0.271881	0.550881	11
methylated.histone.binding	-0.197322	5.31454e-07	3.81744e-05	54
PRC1.complex	-0.0349112	0.639674	0.839573	15
phosphoprotein.binding	-0.0570521	0.249663	0.523385	34
steroid.binding	-0.0369633	0.514165	0.765372	26
cell.body	-0.045919	0.21497	0.479922	61
transcription.elongation.from.RNA.polymerase.II.promoter	-0.071427	0.0622154	0.236505	57
X7.methylguanosine.mRNA.capping	-0.0843075	0.171038	0.42375	22
positive.regulation.of.DNA.templated.transcription..elongation	-0.0466355	0.560412	0.794139	13
positive.regulation.of.viral.transcription	-0.123556	0.062248	0.236505	19
ovarian.follicle.development	-0.0621607	0.190775	0.450545	37
transcription.factor.TFIID.complex	-0.0663438	0.194026	0.45415	32
transcription.factor.TFTC.complex	-0.120761	0.13164	0.367206	13
MLL1.complex	-0.124949	0.0221184	0.127394	28
regulation.of.signal.transduction.by.p53.class.mediator	-0.0999678	0.00013018	0.00330397	123
apoptotic.DNA.fragmentation	-0.0688171	0.356096	0.632303	15
protein.binding.involved.in.protein.folding	0.0700019	0.245191	0.517176	23
chaperone.mediated.protein.folding	0.110484	0.0796533	0.272224	21
epidermal.growth.factor.receptor.binding	-0.0648297	0.204398	0.468196	32
structural.constituent.of.cytoskeleton	0.10332	0.00185279	0.0240736	76
regulation.of.endocytosis	0.0343902	0.521551	0.768175	29
clathrin.coated.vesicle	0.168676	3.0971e-05	0.00112292	51
clathrin.binding	0.122767	0.0088325	0.0713914	38
positive.regulation.of.epidermal.growth.factor.receptor.signaling.pathway	0.0198102	0.764982	0.899409	19
positive.regulation.of.receptor.mediated.endocytosis	-0.062036	0.31381	0.597337	22
clathrin.coat.assembly	0.109201	0.119031	0.348149	17
membrane.organization	0.0295847	0.269354	0.547481	117
clathrin.dependent.endocytosis	0.00373709	0.951616	0.980575	22
transforming.growth.factor.beta.receptor.signaling.pathway	-0.0147334	0.631106	0.838904	89
platelet.alpha.granule.lumen	-0.026125	0.469947	0.735184	64
phagocytosis..recognition	0.0767205	0.400825	0.676092	10
dendrite.development	0.0481018	0.324765	0.609055	35
eye.photoreceptor.cell.development	-0.0096051	0.887804	0.954226	18
axon.terminus	0.0362271	0.375617	0.650228	50
photoreceptor.cell.maintenance	0.0520938	0.272898	0.551908	37
positive.regulation.of.phagocytosis	0.0354608	0.405439	0.677321	46
voltage.gated.ion.channel.activity	-0.0061649	0.891371	0.955118	41
vesicle	0.0522134	0.0483762	0.204177	120
regulation.of.mitochondrial.membrane.potential	0.0191607	0.750418	0.892962	23
response.to.nutrient	0.121068	0.000980843	0.01543	62
extracellular.matrix.organization	0.056281	0.00368118	0.0408578	225
response.to.magnesium.ion	0.107024	0.199218	0.461608	12
response.to.drug	0.0560941	0.0089517	0.0715497	183
response.to.estrogen	0.00305189	0.935943	0.973942	58
negative.regulation.of.bone.resorption	0.0179785	0.822402	0.929874	13
response.to.arsenic.containing.substance	0.0424481	0.625895	0.835185	11
translation.initiation.factor.activity	0.0574565	0.260681	0.537092	32
eukaryotic.translation.initiation.factor.3.complex	0.125421	0.117386	0.345087	13
voltage.gated.calcium.channel.complex	0.146394	0.00977459	0.075024	26
cytoplasmic.side.of.plasma.membrane	0.0622892	0.123924	0.354988	51
membrane.depolarization	0.194323	0.00160406	0.022206	22
ubiquitin.ligase.complex	-0.00822407	0.789834	0.916179	88
RNA.polymerase.II.transcription.factor.binding	-0.116504	0.00180657	0.0237159	60
cellular.protein.modification.process	-0.047206	0.154955	0.400086	76
regulation.of.membrane.potential	0.0929432	0.00148462	0.0210377	98
negative.regulation.of.Notch.signaling.pathway	-0.030908	0.509747	0.761321	38
viral.entry.into.host.cell	-0.0164915	0.605847	0.821681	82
protein.autoubiquitination	-0.0400713	0.295492	0.576891	57
protein.K63.linked.ubiquitination	-0.00920296	0.859251	0.943936	31
G1.S.transition.of.mitotic.cell.cycle	-0.121332	3.67227e-05	0.00129448	97
DNA.replication	-0.150907	2.20859e-09	2.54791e-07	132
positive.regulation.of.G2.M.transition.of.mitotic.cell.cycle	-0.138243	0.0167319	0.105984	25
intercellular.bridge	-0.0476442	0.225975	0.493566	54
negative.regulation.of.G0.to.G1.transition	-0.0589291	0.221164	0.4881	36
positive.regulation.of.endothelial.cell.differentiation	-0.0895526	0.303712	0.585971	11
blood.vessel.morphogenesis	0.0910958	0.169231	0.420811	19
epithelial.cell.differentiation	0.0964775	0.00673693	0.0616526	66
protein.complex.oligomerization	-0.036257	0.312223	0.595807	65
transcription.regulatory.region.sequence.specific.DNA.binding	-0.0411784	0.2337	0.502653	70
RNA.polymerase.II.distal.enhancer.sequence.specific.DNA.binding	-0.125235	0.000239756	0.00504282	72
PML.body	-0.0620765	0.0479997	0.204173	85
circadian.regulation.of.gene.expression	-0.00676981	0.859712	0.943936	57
chromatoid.body	-0.0715464	0.371732	0.646828	13
regulation.of.protein.catabolic.process	-0.0771369	0.285391	0.566523	16
negative.regulation.of.fat.cell.differentiation	-0.0219324	0.618807	0.830397	43
regulation.of.neurogenesis	-0.0492152	0.335322	0.617896	32
regulation.of.insulin.secretion	0.0520005	0.160246	0.408551	61
Hsp90.protein.binding	0.0147593	0.752915	0.89376	38
repressing.transcription.factor.binding	-0.130073	0.00692414	0.0621703	36
E.box.binding	-0.0159978	0.707418	0.869651	46
regulation.of.cellular.senescence	-0.218056	0.00890616	0.0715311	12
phosphatidylinositol.3.kinase.complex	-0.00409354	0.949467	0.979572	20
phosphatidylinositol.biosynthetic.process	0.0106423	0.753315	0.89376	73
T.cell.chemotaxis	-0.0415788	0.632985	0.839573	11
phosphatidylinositol.3.kinase.signaling	0.00381167	0.9396	0.975987	33
X1.phosphatidylinositol.3.kinase.activity	-0.0793331	0.384978	0.657592	10
cytokine.mediated.signaling.pathway	-0.0839469	2.34133e-06	0.000135052	268
natural.killer.cell.activation	-0.124954	0.0340963	0.165567	24
T.cell.differentiation	-0.044236	0.372086	0.646828	34
T.cell.activation	-0.0399414	0.388131	0.660736	39
B.cell.activation	-0.0850601	0.126072	0.359249	27
mast.cell.degranulation	-0.0564049	0.48131	0.743949	13
pyruvate.metabolic.process	0.168745	0.00614641	0.0579193	22
transferase.activity..transferring.acyl.groups	0.0121965	0.839544	0.936544	23
extracellular.matrix.structural.constituent	0.122181	1.84521e-06	0.000108072	128
response.to.axon.injury	-0.01005	0.85397	0.942852	28
L.glutamate.transmembrane.transporter.activity	0.103403	0.214849	0.479922	12
glutamate.secretion	0.0807812	0.153953	0.398706	26
L.glutamate.transmembrane.transport	0.100929	0.19101	0.450821	14
thyroid.hormone.generation	0.00729129	0.930305	0.973435	12
anatomical.structure.morphogenesis	-0.0668686	0.0215755	0.125801	99
thyroid.gland.development	0.00464351	0.942689	0.976189	20
hair.follicle.morphogenesis	-0.0205361	0.74459	0.890001	21
thymus.development	-0.00912599	0.841722	0.93697	40
protein.disulfide.isomerase.activity	0.0354119	0.646392	0.842744	14
negative.regulation.of.macroautophagy	0.0126814	0.869499	0.950357	14
specific.granule.lumen	0.0900039	0.0177786	0.111321	58
tertiary.granule.lumen	0.149526	0.000166753	0.00384745	53
G.protein.coupled.purinergic.nucleotide.receptor.signaling.pathway	0.0492829	0.538369	0.780827	13
G.protein.coupled.purinergic.nucleotide.receptor.activity	0.0269674	0.746332	0.890964	12
ER.to.Golgi.vesicle.mediated.transport	0.0319179	0.151545	0.394889	170
SMAD.protein.signal.transduction	-0.0321368	0.422853	0.69422	52
actin.polymerization.or.depolymerization	0.0765787	0.339042	0.621011	13
vesicle.organization	-0.125283	0.11779	0.346009	13
actin.filament.polymerization	0.0636898	0.252027	0.52718	27
endocytic.vesicle.membrane	0.020741	0.569239	0.800326	63
GTPase.regulator.activity	0.0383272	0.619506	0.831029	14
regulation.of.protein.localization	-0.00859173	0.843708	0.937312	44
ephrin.receptor.signaling.pathway	0.0398003	0.23048	0.497857	76
regulation.of.nitric.oxide.synthase.activity	0.00802414	0.903621	0.960312	19
dendritic.spine.morphogenesis	-0.00141925	0.983836	0.991126	17
protein.containing.complex.assembly	0.00849014	0.758525	0.896257	110
X3..5..cyclic.AMP.phosphodiesterase.activity	-0.081836	0.326276	0.609245	12
calcium.channel.activity	0.124428	0.00258999	0.0312028	49
mitochondrial.inner.membrane	-0.00211465	0.893364	0.955562	342
drug.binding	0.025171	0.530164	0.773735	52
cAMP.mediated.signaling	0.125419	0.0268624	0.144442	26
cGMP.mediated.signaling	0.0513552	0.404372	0.677321	22
cAMP.binding	0.0590694	0.326781	0.609245	23
cGMP.binding	0.0514875	0.489917	0.748806	15
cellular.response.to.drug	-0.0284009	0.470444	0.735184	54
aorta.development	0.0608135	0.34644	0.62333	20
phosphate.ion.binding	0.102479	0.218974	0.484953	12
negative.regulation.of.vascular.permeability	-0.0929163	0.265041	0.543064	12
positive.regulation.of.vascular.permeability	0.0533528	0.540039	0.781425	11
negative.regulation.of.cAMP.mediated.signaling	0.0185361	0.81699	0.927931	13
X3..5..cyclic.GMP.phosphodiesterase.activity	0.0333157	0.644514	0.841449	16
establishment.of.endothelial.barrier	0.0147	0.84373	0.937312	15
cellular.response.to.cAMP	0.073985	0.0732435	0.260596	49
cellular.response.to.transforming.growth.factor.beta.stimulus	0.0200355	0.610635	0.825	54
mitotic.G2.DNA.damage.checkpoint	-0.199361	0.00979915	0.0750611	14
GTPase.inhibitor.activity	0.0227979	0.767719	0.900958	14
NLS.bearing.protein.import.into.nucleus	0.127534	0.0872267	0.287011	15
Ran.GTPase.binding	0.0518751	0.295234	0.576683	34
negative.regulation.of.GTPase.activity	-0.0191496	0.656772	0.849009	45
mitochondrial.nucleoid	-0.0507236	0.279309	0.559353	38
response.to.ischemia	0.081559	0.0531024	0.21438	47
translational.elongation	0.0709036	0.326119	0.609245	16
translation.factor.activity..RNA.binding	0.0381953	0.574778	0.805205	18
cellular.response.to.insulin.stimulus	0.0179785	0.566859	0.798385	85
positive.regulation.of.endocytosis	0.00538032	0.931981	0.973435	21
protein.autophosphorylation	-0.0239883	0.283936	0.565058	168
positive.regulation.of.synapse.assembly	0.0572085	0.135292	0.372792	57
positive.regulation.of.dendritic.spine.morphogenesis	0.0207403	0.754296	0.894023	19
chemokine.receptor.activity	-0.123832	0.0967999	0.307081	15
CCR.chemokine.receptor.binding	-0.073067	0.188817	0.448147	27
chemokine.mediated.signaling.pathway	-0.0992434	0.00646091	0.0597007	63
histone.deacetylase.complex	-0.0417639	0.413598	0.683691	32
negative.regulation.of.mRNA.splicing..via.spliceosome	0.0601259	0.405015	0.677321	16
tubulin.binding	-0.038448	0.351908	0.627501	49
mRNA.5..UTR.binding	-0.0872585	0.187915	0.446561	19
mitochondrial.fission	0.0514289	0.520826	0.767629	13
clathrin.coated.pit	0.0560352	0.179324	0.435666	48
regulation.of.mitochondrion.organization	0.0616753	0.408204	0.679805	15
Rab.GTPase.binding	0.0564892	0.0274396	0.146101	128
synaptic.vesicle.membrane	0.099468	0.00634141	0.0593163	63
rhythmic.process	-0.0767925	0.0381039	0.176191	61
protein.homotetramerization	0.0312413	0.305907	0.587286	90
heart.contraction	0.0593271	0.495639	0.752052	11
mitochondrion.morphogenesis	0.00381614	0.951727	0.980575	21
positive.regulation.of.mitochondrial.fission	0.142562	0.101565	0.317387	11
execution.phase.of.apoptosis	0.00222733	0.973187	0.986928	19
positive.regulation.of.intrinsic.apoptotic.signaling.pathway	-0.0334491	0.519242	0.767373	31
RNA.processing	-0.0492957	0.218915	0.484953	52
epidermal.growth.factor.receptor.signaling.pathway	0.00277909	0.948014	0.978604	46
insulin.receptor.signaling.pathway	-0.0203866	0.531206	0.774531	79
platelet.derived.growth.factor.receptor.signaling.pathway	0.0299789	0.58298	0.809306	28
positive.regulation.of.cell.migration.involved.in.sprouting.angiogenesis	-0.0517657	0.422878	0.69422	20
XY.body	-0.0483282	0.578864	0.806855	11
centriole.replication	-0.157665	0.0289965	0.150806	16
transmembrane.receptor.protein.tyrosine.kinase.signaling.pathway	-0.0331284	0.238927	0.50702	106
negative.regulation.of.protein.autophosphorylation	-0.10915	0.209994	0.475993	11
negative.regulation.of.axon.extension	0.0148939	0.83658	0.93606	16
muscle.cell.differentiation	0.0870167	0.31761	0.601563	11
phosphotyrosine.residue.binding	-0.00336254	0.942081	0.976189	39
receptor.tyrosine.kinase.binding	-0.058869	0.145937	0.388517	51
response.to.endoplasmic.reticulum.stress	0.0495809	0.157557	0.40419	68
negative.regulation.of.MAPK.cascade	0.0287564	0.664327	0.850368	19
vascular.endothelial.growth.factor.receptor.signaling.pathway	0.0501388	0.182969	0.440028	59
phosphatidylinositol.mediated.signaling	0.0556966	0.191315	0.450981	46
cis.Golgi.network	0.0102482	0.806	0.922563	48
transport.vesicle	0.0201759	0.538041	0.780827	78
endocytic.vesicle	0.0526595	0.193375	0.453361	51
mannose.binding	-0.0331047	0.590915	0.814325	22
glycoprotein.catabolic.process	0.00884287	0.922856	0.969457	10
oligosaccharide.catabolic.process	-0.126572	0.146038	0.388517	11
azurophil.granule.membrane	-0.0148747	0.702843	0.867933	55
lysosomal.lumen	-0.0468897	0.126471	0.359638	89
CD40.receptor.complex	-0.0656944	0.450552	0.719484	11
positive.regulation.of.DNA.binding.transcription.factor.activity	-0.0105278	0.709526	0.86994	105
retinoid.metabolic.process	0.108939	0.00381118	0.0417857	59
dystroglycan.binding	0.141346	0.121659	0.35213	10
glycosaminoglycan.biosynthetic.process	0.0335487	0.46289	0.729506	40
glycosaminoglycan.catabolic.process	-0.00132886	0.981652	0.991075	25
G.protein.coupled.acetylcholine.receptor.signaling.pathway	0.0219298	0.776324	0.906862	14
sialic.acid.binding	-0.0733468	0.37896	0.652412	12
receptor.clustering	0.0387297	0.502675	0.754521	25
heparan.sulfate.proteoglycan.binding	0.0295175	0.68269	0.860537	16
synapse.organization	0.115482	0.0165056	0.105249	36
L.ascorbic.acid.binding	-0.032003	0.647784	0.843404	17
angiogenesis	-0.0386944	0.0508822	0.209152	215
lens.morphogenesis.in.camera.type.eye	0.0381608	0.676027	0.857839	10
megakaryocyte.development	-0.0925468	0.199947	0.462748	16
negative.regulation.of.myeloid.cell.differentiation	-0.0330746	0.636826	0.839573	17
negative.regulation.of.cardiac.muscle.cell.proliferation	0.0848722	0.289326	0.571003	13
definitive.hemopoiesis	0.0341572	0.636177	0.839573	16
establishment.of.planar.polarity	-0.0469237	0.557992	0.794051	13
vesicle.docking	0.140842	0.0292184	0.151134	20
protein.localization.to.plasma.membrane	0.0783799	0.00212912	0.0272914	129
transcription.elongation.factor.complex	-0.096461	0.135329	0.372792	20
snRNA.transcription.by.RNA.polymerase.II	-0.0473274	0.21264	0.478353	58
organic.anion.transmembrane.transporter.activity	-0.0154256	0.859381	0.943936	11
organic.anion.transport	0.0285436	0.711533	0.871206	14
toxin.transport	0.0278286	0.563429	0.79536	36
nucleosomal.DNA.binding	0.0238769	0.698251	0.865581	22
nuclear.receptor.activity	0.0366954	0.384195	0.657361	47
bile.acid.metabolic.process	0.188584	0.0303207	0.154941	11
embryo.development.ending.in.birth.or.egg.hatching	0.0822227	0.203027	0.46655	20
intracellular.receptor.signaling.pathway	0.000626049	0.989921	0.99406	34
homeostatic.process	-0.0569928	0.4942	0.75103	12
cholesterol.homeostasis	0.0254122	0.449927	0.71909	74
positive.regulation.of.viral.genome.replication	-0.00726242	0.899978	0.958278	25
RNA.polymerase.II.transcription.factor.complex	-0.044297	0.206692	0.472031	68
cellular.response.to.leukemia.inhibitory.factor	-0.0672159	0.0259459	0.141109	92
mitochondrial.respiratory.chain.complex.IV	0.0563124	0.537456	0.780356	10
mitochondrial.electron.transport..cytochrome.c.to.oxygen	0.010635	0.882906	0.953056	16
double.strand.break.repair.via.homologous.recombination	-0.149009	8.19873e-06	0.000362937	75
double.strand.break.repair.via.nonhomologous.end.joining	-0.10225	0.0235063	0.131407	41
response.to.ethanol	0.0552006	0.0659475	0.244939	93
regulation.of.proteasomal.protein.catabolic.process	-0.0367489	0.622155	0.832456	15
proteasome.binding	-0.00492639	0.947328	0.978561	15
nucleus.organization	0.12629	0.0566784	0.221762	19
I.band	0.227723	0.001151	0.0172833	17
node.of.Ranvier	0.126573	0.089634	0.290909	15
regulation.of.neuron.differentiation	0.0445902	0.489976	0.748806	20
positive.regulation.of.astrocyte.differentiation	0.0508197	0.559448	0.794139	11
chaperone.binding	-0.00684825	0.816732	0.927931	96
RNA.polymerase.binding	0.0171104	0.818521	0.927931	15
regulation.of.heart.rate.by.cardiac.conduction	0.0384446	0.431272	0.701371	35
negative.regulation.of.amyloid.beta.formation	0.177459	0.0267245	0.144089	13
outflow.tract.morphogenesis	-0.0284174	0.514345	0.765372	44
cell.cell.junction	0.0582521	0.0132775	0.0919047	152
cell.cell.junction.assembly	0.113896	0.00896058	0.0715497	44
calcium.independent.cell.cell.adhesion.via.plasma.membrane.cell.adhesion.molecules	0.117386	0.0625748	0.23751	21
roof.of.mouth.development	0.0206731	0.570504	0.801739	63
face.morphogenesis	-0.0242127	0.640827	0.839803	31
nuclear.localization.sequence.binding	-0.00776312	0.897455	0.957417	23
establishment.or.maintenance.of.cell.polarity	0.0631691	0.202453	0.46655	34
positive.regulation.of.stress.activated.MAPK.cascade	-0.0134146	0.852616	0.942208	16
response.to.hydrogen.peroxide	0.110175	0.00898365	0.0715497	47
positive.regulation.of.axonogenesis	0.0194386	0.707993	0.869651	31
co.SMAD.binding	-0.0866961	0.342422	0.621057	10
somatic.stem.cell.population.maintenance	-0.0757545	0.0542088	0.216019	54
skeletal.muscle.cell.differentiation	0.00846956	0.847637	0.939779	43
arachidonic.acid.metabolic.process	0.146504	0.0233186	0.130935	20
organelle.membrane	0.0142692	0.875829	0.952241	10
negative.regulation.of.endothelial.cell.proliferation	0.0840449	0.137992	0.376585	26
negative.regulation.of.endothelial.cell.migration	0.0955745	0.149228	0.391811	19
negative.regulation.of.angiogenesis	0.0151526	0.650171	0.844779	75
negative.regulation.of.endothelial.cell.apoptotic.process	-0.0441812	0.418434	0.689249	28
adult.locomotory.behavior	0.0767668	0.0686912	0.250802	47
exploration.behavior	-0.0341594	0.694823	0.864239	11
apical.part.of.cell	0.00266383	0.940363	0.975987	66
maturation.of.LSU.rRNA.from.tricistronic.rRNA.transcript..SSU.rRNA..5.8S.rRNA..LSU.rRNA.	0.00450987	0.955099	0.98163	13
condensed.chromosome	-0.186363	0.0024788	0.030249	22
rRNA.processing	-0.0897808	0.000653487	0.0111562	121
preribosome..large.subunit.precursor	-0.108003	0.0794969	0.272224	22
protein.localization.to.organelle	-0.159252	0.0390933	0.178501	14
ribosomal.large.subunit.biogenesis	-0.0780091	0.176988	0.431981	25
ribonucleoprotein.complex.binding	-0.0962787	0.0833557	0.279603	27
cell.fate.determination	0.0943531	0.178014	0.433747	17
somitogenesis	-0.0748047	0.0860658	0.284668	44
type.B.pancreatic.cell.development	0.0144024	0.86284	0.945547	12
Notch.binding	-0.0503524	0.41361	0.683691	22
proximal.distal.pattern.formation	0.0202049	0.742865	0.889056	22
spinal.cord.development	0.0725723	0.176189	0.431567	29
hemopoiesis	-0.0383799	0.338475	0.621011	52
negative.regulation.of.interleukin.10.production	-0.156789	0.0502939	0.208458	13
negative.regulation.of.myoblast.differentiation	-0.139054	0.0183727	0.113363	24
positive.regulation.of.Notch.signaling.pathway	-0.0245991	0.576821	0.806152	43
neuron.fate.specification	0.0319679	0.678755	0.859106	14
inner.ear.development	0.00364685	0.935611	0.973942	41
left.right.axis.specification	-0.107194	0.180804	0.437056	13
energy.homeostasis	0.0961595	0.0559315	0.219743	33
scaffold.protein.binding	0.0847173	0.034616	0.16782	52
neuronal.stem.cell.population.maintenance	-0.0846815	0.159781	0.40808	23
positive.regulation.of.sprouting.angiogenesis	0.0245884	0.733457	0.883663	16
voltage.gated.calcium.channel.activity	0.0818228	0.0893684	0.290506	36
positive.regulation.of.cytosolic.calcium.ion.concentration	-0.0201641	0.412212	0.682894	139
cell.death	0.041751	0.428698	0.699819	30
high.voltage.gated.calcium.channel.activity	0.208136	0.0226518	0.12966	10
modulation.of.chemical.synaptic.transmission	0.0847963	0.0282098	0.148952	56
response.to.amyloid.beta	0.110545	0.152093	0.395774	14
negative.regulation.of.receptor.internalization	0.0210688	0.817532	0.927931	10
frizzled.binding	0.012219	0.791768	0.916188	39
cytoskeletal.adaptor.activity	0.120475	0.132556	0.368352	13
positive.regulation.of.epithelial.to.mesenchymal.transition	-0.0367709	0.421048	0.692111	40
positive.regulation.of.pathway.restricted.SMAD.protein.phosphorylation	-0.109166	0.0104326	0.0777241	46
positive.regulation.of.cell.growth	-0.0155479	0.652965	0.847196	70
azurophil.granule.lumen	0.0572353	0.0787548	0.272224	79
positive.regulation.of.phosphorylation	-0.0130546	0.821254	0.92968	25
positive.regulation.of.exosomal.secretion	0.164011	0.0278523	0.147679	15
extracellular.vesicle	0.027732	0.480961	0.743711	54
lipid.droplet	0.091479	0.00690426	0.0621383	73
lipid.metabolic.process	0.0924784	0.00049792	0.00924673	119
phototransduction	0.195546	0.000713642	0.0118058	25
phospholipid.transport	0.0159623	0.778159	0.907892	26
phosphatidic.acid.binding	0.0853339	0.210052	0.475993	18
RNA.splicing..via.transesterification.reactions	-0.0553175	0.403849	0.677321	19
snoRNA.binding	-0.0849528	0.254617	0.530557	15
chromosome.segregation	-0.195011	2.22573e-07	1.76528e-05	59
poly.A..binding	-0.127275	0.0487847	0.204767	20
negative.regulation.of.protein.complex.assembly	0.166017	0.0259964	0.141182	15
translation.initiation.factor.binding	0.0902524	0.173213	0.427364	19
stress.granule.assembly	0.0360037	0.629235	0.837001	15
RNA.stem.loop.binding	-0.0467551	0.574907	0.805205	12
ribosomal.small.subunit.binding	0.126036	0.102498	0.318799	14
negative.regulation.of.cysteine.type.endopeptidase.activity.involved.in.apoptotic.process	-0.0328168	0.36036	0.637199	65
positive.regulation.of.cysteine.type.endopeptidase.activity.involved.in.apoptotic.process	-0.0357872	0.411532	0.682362	44
positive.regulation.of.translational.initiation	0.116058	0.0882474	0.289084	18
cellular.response.to.osmotic.stress	0.230725	0.0115167	0.0828812	10
intrinsic.apoptotic.signaling.pathway	-0.0776647	0.187835	0.446561	24
positive.regulation.of.G1.S.transition.of.mitotic.cell.cycle	-0.0300904	0.555824	0.792814	32
negative.regulation.of.intrinsic.apoptotic.signaling.pathway	-0.00248934	0.969257	0.986405	20
coreceptor.activity	-0.0898973	0.0832403	0.279603	31
viral.genome.replication	0.0282414	0.734789	0.88455	12
ribonuclease.activity	-0.0486297	0.475045	0.738463	18
RNA.catabolic.process	-0.0113294	0.857365	0.943853	21
immunological.synapse.formation	0.0521652	0.549097	0.788538	11
positive.regulation.of.cell.matrix.adhesion	0.0127314	0.822215	0.929874	26
dendritic.cell.chemotaxis	-0.100316	0.16474	0.415341	16
positive.regulation.of.T.cell.chemotaxis	0.0663363	0.358249	0.635237	16
T.cell.costimulation	-0.152371	0.000194153	0.00429734	50
ruffle.organization	-0.0523942	0.529688	0.773735	12
positive.regulation.of.cell.adhesion.mediated.by.integrin	-0.0145159	0.85619	0.943853	13
positive.regulation.of.phosphatidylinositol.3.kinase.activity	-0.0494167	0.348897	0.624506	30
positive.regulation.of.protein.kinase.activity	-0.00974838	0.815286	0.927059	48
cell.maturation	-0.00199768	0.966918	0.985486	36
positive.regulation.of.chemotaxis	0.0475412	0.497358	0.752484	17
release.of.sequestered.calcium.ion.into.cytosol	0.0161959	0.710158	0.870155	44
cell.chemotaxis	-0.11472	0.00150921	0.0211234	64
positive.regulation.of.neutrophil.chemotaxis	0.0131241	0.831255	0.934844	22
cellular.response.to.chemokine	0.103827	0.17858	0.434689	14
positive.regulation.of.cell.motility	0.123532	0.0871133	0.286886	16
positive.regulation.of.T.cell.migration	-0.0675941	0.398731	0.674065	13
blastocyst.formation	-0.203788	0.00476803	0.0482763	16
regulation.of.Notch.signaling.pathway	0.153017	0.047432	0.202437	14
actin.filament	0.0341918	0.376256	0.650386	56
ruffle	0.0300877	0.326801	0.609245	89
negative.regulation.of.cell.cell.adhesion	0.0484577	0.515814	0.766025	15
microvillus.membrane	-0.060405	0.315962	0.599635	23
signaling.pattern.recognition.receptor.activity	-0.0388155	0.670793	0.854655	10
protein.localization.to.cell.surface	0.046013	0.444947	0.713828	23
negative.regulation.of.viral.entry.into.host.cell	0.064548	0.343074	0.621057	18
osteoblast.differentiation	0.00892886	0.761341	0.897068	97
atrioventricular.valve.morphogenesis	-0.128917	0.138714	0.377742	11
insulin.like.growth.factor.binding	0.00107219	0.988528	0.993225	15
positive.regulation.of.cell.substrate.adhesion	0.0254908	0.572285	0.803055	41
positive.regulation.of.BMP.signaling.pathway	-0.0656993	0.220769	0.487511	29
wound.healing..spreading.of.cells	0.00623021	0.945606	0.977287	10
atrial.septum.morphogenesis	-0.186729	0.031987	0.159935	11
labyrinthine.layer.blood.vessel.development	0.0332448	0.635093	0.839573	17
regulation.of.ERK1.and.ERK2.cascade	-0.0126766	0.826345	0.932117	25
reactive.oxygen.species.metabolic.process	0.0348496	0.538514	0.780827	26
integral.component.of.peroxisomal.membrane	0.185282	0.0129695	0.0902683	15
peroxisome.organization	0.191272	0.00807387	0.069228	16
protein.import.into.peroxisome.matrix	0.106996	0.21913	0.485016	11
phosphate.containing.compound.metabolic.process	-0.0015411	0.982449	0.991075	17
monocyte.differentiation	-0.0216883	0.756864	0.895395	17
regulation.of.nucleic.acid.templated.transcription	-0.00817296	0.928684	0.973435	10
endochondral.ossification	0.0649565	0.242718	0.513513	27
fatty.acid.beta.oxidation	0.148109	0.00119176	0.0177922	40
enzyme.inhibitor.activity	-0.0483084	0.403119	0.677321	25
sarcoplasmic.reticulum.membrane	0.0203362	0.704672	0.869027	29
regulation.of.calcium.ion.transport	0.0100185	0.857012	0.943853	27
positive.regulation.of.cold.induced.thermogenesis	0.073562	0.012796	0.0897131	96
interferon.gamma.mediated.signaling.pathway	0.00850675	0.804321	0.922304	71
protein.K48.linked.ubiquitination	-0.0543693	0.234171	0.502734	40
chondrocyte.differentiation	-0.0408286	0.431454	0.701371	31
glial.cell.differentiation	0.142385	0.0650843	0.24268	14
hindbrain.development	-0.0296429	0.663266	0.850368	18
commissural.neuron.axon.guidance	0.110494	0.185039	0.443047	12
negative.regulation.of.pri.miRNA.transcription.by.RNA.polymerase.II	0.0123467	0.882262	0.953056	12
protein.serine.threonine.phosphatase.activity	-0.0372613	0.36697	0.64215	49
COPII.vesicle.coating	0.0335522	0.381055	0.654341	57
neuron.differentiation	-0.00632984	0.807067	0.922674	125
regulation.of.proteasomal.ubiquitin.dependent.protein.catabolic.process	-0.0856486	0.348286	0.624506	10
sensory.perception.of.taste	0.0450963	0.573426	0.804064	13
canonical.Wnt.signaling.pathway	-0.0444838	0.192014	0.45179	72
cellular.response.to.retinoic.acid	-0.000788676	0.983008	0.991075	61
hematopoietic.stem.cell.proliferation	-0.0477741	0.550878	0.790201	13
nucleoside.diphosphate.phosphorylation	-0.044041	0.554799	0.792222	15
nucleoside.metabolic.process	0.16954	0.0419849	0.185564	12
nucleobase.containing.small.molecule.interconversion	0.00243178	0.967107	0.985486	24
prostaglandin.metabolic.process	0.0609094	0.384583	0.657592	17
protein.kinase.B.signaling	-0.0458471	0.328141	0.609978	38
neurotransmitter.secretion	0.102184	0.0177302	0.111201	45
sex.differentiation	-0.00292621	0.97319	0.986928	11
positive.regulation.of.endothelial.cell.migration	0.017427	0.676222	0.857839	48
cell.proliferation.in.forebrain	-0.0240077	0.782758	0.910694	11
establishment.of.cell.polarity	0.0331519	0.503545	0.755318	34
positive.regulation.of.cellular.protein.metabolic.process	-0.193354	0.00951848	0.0738674	15
response.to.estradiol	0.0553541	0.0597141	0.229396	97
embryonic.forelimb.morphogenesis	-0.0469808	0.357726	0.634606	32
embryonic.hindlimb.morphogenesis	-0.0318297	0.559938	0.794139	28
embryonic.digit.morphogenesis	-0.0167557	0.67898	0.859106	51
negative.regulation.of.neurogenesis	-0.114177	0.070097	0.254152	21
secondary.palate.development	-0.0352894	0.659519	0.849749	13
Schaffer.collateral...CA1.synapse	0.0937263	0.00399239	0.0430567	79
presynapse.assembly	0.0753604	0.346781	0.623617	13
regulation.of.postsynapse.organization	0.0468083	0.504012	0.755423	17
regulation.of.presynapse.assembly	0.0485283	0.391735	0.665477	26
regulation.of.synaptic.vesicle.exocytosis	0.115591	0.00669001	0.0613707	46
positive.regulation.of.excitatory.postsynaptic.potential	0.135222	0.0192702	0.117591	25
anaphase.promoting.complex	-0.115387	0.0995255	0.312877	17
exit.from.mitosis	0.167984	0.053695	0.215402	11
ubiquitin.like.protein.ligase.binding	0.00736188	0.911542	0.963955	19
protein.K11.linked.ubiquitination	-0.114336	0.0697061	0.253217	21
positive.regulation.of.ubiquitin.protein.ligase.activity	-0.22366	0.0102075	0.0765291	11
carnitine.shuttle	0.0319115	0.713991	0.872869	11
positive.regulation.of.lipid.storage	-0.126071	0.147641	0.390378	11
regulation.of.glucose.metabolic.process	0.0286653	0.641623	0.840027	22
response.to.organic.cyclic.compound	0.0369756	0.401583	0.676771	43
response.to.nutrient.levels	-0.00393945	0.934816	0.973717	36
regulation.of.cholesterol.biosynthetic.process	0.0411664	0.42031	0.691197	32
fatty.acyl.CoA.biosynthetic.process	0.131106	0.132132	0.367978	11
stress.fiber	0.00881817	0.824298	0.931741	53
SH3.SH2.adaptor.activity	-0.0142305	0.722661	0.876783	52
positive.regulation.of.signal.transduction	-0.0328826	0.359398	0.636384	65
brown.fat.cell.differentiation	0.085943	0.122188	0.352551	27
response.to.progesterone	-0.0560173	0.209138	0.47477	42
establishment.of.skin.barrier	0.13305	0.0394097	0.178823	20
protein.kinase.C.activating.G.protein.coupled.receptor.signaling.pathway	0.0185535	0.738622	0.886345	27
regulation.of.lipid.metabolic.process	0.0849049	0.00683992	0.061816	85
sphingolipid.biosynthetic.process	0.00295663	0.9453	0.977287	45
androgen.receptor.signaling.pathway	-0.076337	0.129137	0.363512	33
neural.tube.closure	-0.00406973	0.90434	0.96049	73
nucleosome.disassembly	0.0382528	0.574202	0.804855	18
chromatin.remodeling	-0.0512951	0.0825874	0.278081	96
SWI.SNF.complex	0.0429207	0.552232	0.790951	16
nuclear.receptor.binding	-0.0143052	0.829087	0.932999	19
stem.cell.population.maintenance	-0.184169	1.01727e-05	0.000425578	48
intracellular.estrogen.receptor.signaling.pathway	-0.0526669	0.426748	0.698729	19
forebrain.development	0.00467365	0.913636	0.96483	45
nucleosome.binding	-0.119254	0.0648506	0.24268	20
ATP.dependent.chromatin.remodeling	-0.00773712	0.885341	0.953467	29
chromatin.mediated.maintenance.of.transcription	-0.0511906	0.575086	0.805205	10
cardiac.muscle.cell.differentiation	-0.0728244	0.247977	0.520997	21
placenta.blood.vessel.development	-0.099053	0.278051	0.558302	10
npBAF.complex	0.0502802	0.546427	0.785591	12
nBAF.complex	0.0538238	0.485604	0.745742	14
RNA.polymerase.II.activating.transcription.factor.binding	-0.0866226	0.0379086	0.176191	48
regulation.of.circadian.rhythm	-0.020756	0.578275	0.806855	60
entrainment.of.circadian.clock.by.photoperiod	-0.0129783	0.848815	0.939848	18
insulin.like.growth.factor.receptor.binding	-0.052042	0.500163	0.754024	14
JAK.STAT.cascade	-0.129757	0.0139075	0.0950552	30
lactation	0.0280274	0.544789	0.784719	39
cellular.response.to.hormone.stimulus	0.0802424	0.0720064	0.258124	42
interleukin.7.mediated.signaling.pathway	0.00786676	0.913243	0.964683	16
negative.regulation.of.multicellular.organism.growth	0.0932429	0.28422	0.565097	11
negative.regulation.of.JAK.STAT.cascade	0.0332957	0.67764	0.85878	13
growth.hormone.receptor.signaling.pathway	0.0039007	0.962681	0.984172	12
mammary.gland.alveolus.development	-0.0482303	0.517786	0.767373	15
ERBB2.signaling.pathway	-0.0560071	0.288391	0.570044	30
regulation.of.cell.motility	-0.0275871	0.62634	0.835486	26
negative.regulation.of.signal.transduction	0.070535	0.132471	0.368352	38
phosphatidylserine.binding	0.0834696	0.0355918	0.170652	53
peripheral.nervous.system.development	-0.064533	0.273811	0.552553	24
negative.regulation.of.protein.ubiquitination	0.0135056	0.753976	0.893922	45
negative.regulation.of.protein.catabolic.process	0.0513078	0.33894	0.621011	29
apoptotic.cell.clearance	0.0428179	0.518187	0.767373	19
engulfment.of.apoptotic.cell	0.149546	0.101495	0.317387	10
regulation.of.synaptic.plasticity	0.0744095	0.0842218	0.280273	45
positive.regulation.of.myoblast.fusion	-0.0746109	0.286843	0.567279	17
DNA.dependent.DNA.replication	-0.138806	0.0276653	0.146932	21
DNA.polymerase.binding	-0.00813666	0.916046	0.964967	14
water.transport	0.0125183	0.871163	0.950357	14
water.channel.activity	0.041958	0.645895	0.842445	10
tricarboxylic.acid.cycle	0.18786	0.000150323	0.00363456	34
transmembrane.receptor.protein.tyrosine.phosphatase.activity	0.170442	0.0149714	0.0994697	17
beta.catenin.binding	-0.0322375	0.325163	0.609245	78
negative.regulation.of.cell.migration	-0.012169	0.674303	0.85671	100
alpha.catenin.binding	0.205326	0.0245457	0.135625	10
gamma.catenin.binding	0.112767	0.17616	0.431567	12
cellular.response.to.interleukin.6	0.0140981	0.845199	0.938097	16
positive.regulation.of.insulin.secretion.involved.in.cellular.response.to.glucose.stimulus	0.0356496	0.506416	0.758131	29
neuron.cell.cell.adhesion	0.126333	0.0801854	0.273046	16
positive.regulation.of.dendrite.morphogenesis	-0.0144505	0.818681	0.927931	21
cellular.response.to.organic.substance	0.0260118	0.659141	0.849749	24
filamin.binding	-0.0463855	0.611483	0.825101	10
protein.kinase.inhibitor.activity	0.08252	0.153247	0.397148	25
negative.regulation.of.protein.kinase.activity	-0.00543858	0.880433	0.953056	64
positive.regulation.of.tyrosine.phosphorylation.of.STAT.protein	-0.147079	4.14142e-05	0.00143331	65
negative.regulation.of.tyrosine.phosphorylation.of.STAT.protein	-0.107913	0.215209	0.479965	11
regulation.of.interferon.gamma.mediated.signaling.pathway	-0.166371	0.0377938	0.176191	13
interleukin.6.mediated.signaling.pathway	-0.147763	0.0407171	0.182123	16
immunological.synapse	-0.0494468	0.333054	0.615802	32
proteasomal.protein.catabolic.process	-0.0527277	0.334214	0.61645	28
negative.regulation.of.T.cell.activation	-0.123218	0.139398	0.378089	12
cytochrome.c.oxidase.activity	-0.0641143	0.406179	0.677321	14
mitochondrial.respiratory.chain	-0.0229651	0.782953	0.910694	12
positive.regulation.of.glycolytic.process	-0.0080908	0.897871	0.957477	21
NAD.binding	0.132492	0.00374189	0.041411	40
canonical.glycolysis	0.142335	0.0104718	0.0778637	27
regulation.of.muscle.contraction	-0.00439975	0.956195	0.98163	13
negative.regulation.of.cardiac.muscle.cell.apoptotic.process	-0.0391702	0.52478	0.770956	22
response.to.toxic.substance	0.0356457	0.327984	0.609978	63
regulation.of.dendritic.spine.morphogenesis	0.0317717	0.659928	0.849749	16
fatty.acid.binding	0.205363	0.00147565	0.0210377	20
kinetochore	-0.177432	3.49243e-07	2.65914e-05	69
microtubule.motor.activity	-0.0237592	0.511096	0.762354	64
cytoplasmic.dynein.complex	0.0104222	0.88173	0.953056	17
spectrin.binding	0.210252	0.000117838	0.00307267	28
vesicle.transport.along.microtubule	0.0702391	0.380534	0.653743	13
liver.development	0.0191456	0.57979	0.807203	70
Golgi.organization	0.0263032	0.375887	0.650228	95
Golgi.cisterna	0.0865987	0.342965	0.621057	10
positive.regulation.of.cytokinesis	-0.074716	0.131662	0.367206	34
neuron.apoptotic.process	0.0327867	0.490156	0.748806	37
COPI.vesicle.coat	0.0923127	0.289052	0.570757	11
histone.deacetylase.binding	-0.0732562	0.00989025	0.0753044	104
hyaluronic.acid.binding	-0.040892	0.537182	0.780256	19
chondroitin.sulfate.biosynthetic.process	0.0458155	0.418746	0.689249	26
chondroitin.sulfate.catabolic.process	0.000365497	0.996222	0.998057	14
dermatan.sulfate.biosynthetic.process	-0.0404891	0.627196	0.836042	12
IRE1.mediated.unfolded.protein.response	0.0587863	0.150511	0.393541	50
negative.regulation.of.G1.S.transition.of.mitotic.cell.cycle	-0.129713	0.00506757	0.0507691	39
GTP.Rho.binding	-0.00974406	0.880088	0.953056	20
positive.regulation.of.protein.complex.assembly	0.0213152	0.735256	0.88455	21
cellular.response.to.oxidative.stress	0.0237656	0.438613	0.708444	89
heparin.binding	0.0299433	0.194459	0.454518	158
positive.regulation.of.release.of.sequestered.calcium.ion.into.cytosol	-0.0494264	0.374048	0.649339	27
blood.vessel.development	-0.0777095	0.101935	0.317693	37
ATP.metabolic.process	0.113453	0.0263519	0.142705	32
animal.organ.morphogenesis	-0.00986881	0.722049	0.876783	109
neuromuscular.junction.development	0.081305	0.129687	0.364098	29
neural.tube.development	-0.0432297	0.428527	0.699819	28
cytoplasmic.microtubule.organization	-0.0198604	0.663869	0.850368	40
negative.regulation.of.protein.binding	-0.0313792	0.364148	0.640177	70
positive.regulation.of.proteasomal.ubiquitin.dependent.protein.catabolic.process	-0.0306326	0.404313	0.677321	62
protein.localization.to.nucleus	-0.0737525	0.155287	0.400528	31
social.behavior	0.0681294	0.0956673	0.30524	50
protein.localization.to.microtubule	-0.124126	0.174059	0.428979	10
non.canonical.Wnt.signaling.pathway	0.070876	0.272508	0.551536	20
Rac.GTPase.binding	0.0220901	0.604279	0.82064	46
axon.extension	0.0417229	0.461507	0.728121	26
dendrite.morphogenesis	0.124212	0.012201	0.0868207	34
prepulse.inhibition	0.00734897	0.921497	0.968842	15
cochlea.morphogenesis	0.084504	0.160659	0.408842	23
regulation.of.cellular.protein.localization	-0.0111382	0.881268	0.953056	15
beta.catenin.destruction.complex.disassembly	-0.0567314	0.368131	0.643469	21
Wnt.signalosome	-0.183186	0.0353893	0.17011	11
aggresome	0.0236789	0.599895	0.81798	41
cellular.protein.localization	-0.00724873	0.882034	0.953056	35
hippo.signaling	-0.0486432	0.390615	0.663871	26
positive.regulation.of.JUN.kinase.activity	-0.0206309	0.672774	0.856052	35
protein.self.association	0.0551875	0.160769	0.408849	54
clathrin.coated.endocytic.vesicle	0.0862578	0.171192	0.42375	21
dynein.complex	-0.0148694	0.809222	0.923944	22
positive.regulation.by.host.of.viral.transcription	-0.0601335	0.404956	0.677321	16
hematopoietic.stem.cell.differentiation	-0.120379	0.132865	0.368672	13
ion.channel.activity	0.137582	0.0196448	0.119113	24
S100.protein.binding	0.114801	0.136933	0.375986	14
negative.regulation.of.cytosolic.calcium.ion.concentration	0.0506675	0.560626	0.794139	11
cellular.response.to.zinc.ion	0.0544714	0.399045	0.67423	20
ER.to.Golgi.transport.vesicle.membrane	0.138058	0.000575068	0.0100889	52
endoplasmic.reticulum.Golgi.intermediate.compartment.membrane	0.0330189	0.364883	0.640479	63
organelle.organization	-0.048749	0.575562	0.805576	11
nuclear.envelope.organization	-0.0327233	0.640409	0.839573	17
synaptic.vesicle	0.0710462	0.0111675	0.0815589	107
secretory.granule	0.0512669	0.106567	0.326357	83
intermediate.filament.cytoskeleton.organization	0.150385	0.043733	0.19093	15
synaptic.vesicle.transport	0.0886344	0.234607	0.502898	15
chaperone.cofactor.dependent.protein.refolding	0.0155188	0.780167	0.909677	27
misfolded.protein.binding	0.0893743	0.114711	0.340909	26
ER.associated.misfolded.protein.catabolic.process	0.0407278	0.655597	0.848491	10
endoplasmic.reticulum.organization	0.0028021	0.956941	0.981961	31
SNAP.receptor.activity	0.133678	0.0127224	0.0896889	29
integral.component.of.synaptic.vesicle.membrane	0.0796589	0.113296	0.337759	33
Golgi.ribbon.formation	0.115194	0.16704	0.417545	12
endopeptidase.activity	0.0625712	0.0811584	0.275129	65
Golgi.associated.vesicle	-0.0533211	0.474591	0.73836	15
membrane.protein.ectodomain.proteolysis	0.00881932	0.891394	0.955118	20
integrin.mediated.signaling.pathway	0.0435053	0.168305	0.419604	84
protein.processing	-0.0049436	0.898204	0.957515	56
response.to.tumor.necrosis.factor	-0.0215995	0.697676	0.865446	27
pore.complex	0.0199349	0.811009	0.924771	12
pore.complex.assembly	0.180612	0.0479464	0.204173	10
perinuclear.endoplasmic.reticulum	0.0664878	0.342562	0.621057	17
synaptic.membrane	0.129755	0.0220187	0.127201	26
tetraspanin.enriched.microdomain	0.0226797	0.803856	0.922049	10
cobalamin.metabolic.process	0.0934466	0.158494	0.405775	19
proteasomal.ubiquitin.independent.protein.catabolic.process	0.0101935	0.874602	0.952241	20
prostaglandin.biosynthetic.process	-0.0364877	0.675174	0.857209	11
acute.inflammatory.response	-0.0646364	0.402367	0.677321	14
cyclooxygenase.pathway	0.0362485	0.691405	0.864217	10
response.to.retinoic.acid	-0.0201288	0.640431	0.839573	45
response.to.cytokine	-0.0965541	0.0206764	0.122609	48
glutathione.binding	0.163788	0.0728758	0.259531	10
response.to.calcium.ion	0.151268	0.000161568	0.00377356	52
chromatin.silencing	-0.00703991	0.913209	0.964683	20
positive.regulation.of.intracellular.estrogen.receptor.signaling.pathway	-0.0413307	0.650834	0.845063	10
MLL3.4.complex	-0.0428379	0.592777	0.814325	13
regulation.of.megakaryocyte.differentiation	-0.15013	0.00101957	0.0158393	40
histone.H3.K4.methylation	-0.107135	0.089211	0.290506	21
GDP.dissociation.inhibitor.activity	0.0378829	0.663502	0.850368	11
activation.of.protein.kinase.B.activity	0.0246616	0.640157	0.839573	30
regulation.of.cell.adhesion.mediated.by.integrin	0.152431	0.0570337	0.222466	13
cellular.response.to.vascular.endothelial.growth.factor.stimulus	-0.0410719	0.451934	0.719719	28
regulation.of.GTPase.activity	0.0946104	0.00659548	0.0606498	69
cellular.response.to.fibroblast.growth.factor.stimulus	-0.00734057	0.89497	0.956077	27
regulation.of.blood.vessel.diameter	-0.00443938	0.934058	0.973435	29
positive.regulation.of.cell.division	0.00525616	0.902922	0.960282	45
positive.regulation.of.focal.adhesion.assembly	0.0154034	0.793934	0.916467	24
negative.regulation.of.focal.adhesion.assembly	0.031437	0.644253	0.841396	18
negative.regulation.of.cell.migration.involved.in.sprouting.angiogenesis	-0.0550639	0.475608	0.739037	14
negative.regulation.of.substrate.adhesion.dependent.cell.spreading	0.0315127	0.705429	0.869397	12
response.to.amphetamine	0.014098	0.785893	0.912163	31
tRNA.methylation	-0.131261	0.0144289	0.0973951	29
detection.of.visible.light	0.224246	0.00714768	0.0632969	12
protein.chromophore.linkage	0.216475	0.00941324	0.0735856	12
kidney.development	0.00371787	0.903023	0.960282	90
aging	0.0310083	0.186028	0.443841	153
cysteine.type.endopeptidase.activator.activity.involved.in.apoptotic.process	-0.172851	0.0381354	0.176191	12
heat.shock.protein.binding	0.0172763	0.660628	0.849749	54
ADP.binding	0.130772	0.0147977	0.0990065	29
intrinsic.apoptotic.signaling.pathway.in.response.to.endoplasmic.reticulum.stress	0.0379634	0.471756	0.735376	30
positive.regulation.of.apoptotic.signaling.pathway	0.00747122	0.905654	0.961468	21
preribosome..small.subunit.precursor	0.041753	0.616486	0.829053	12
negative.regulation.of.I.kappaB.kinase.NF.kappaB.signaling	-0.0843365	0.0649775	0.24268	40
positive.regulation.of.innate.immune.response	-0.0569955	0.354748	0.631087	22
caspase.binding	-0.0273965	0.764167	0.899207	10
inositol.phosphate.metabolic.process	0.0287567	0.504575	0.755846	45
inositol.phosphate.dephosphorylation	0.0413947	0.591757	0.814325	14
MAP.kinase.kinase.activity	-0.0292883	0.694503	0.864239	15
protein.tyrosine.kinase.activity	-0.0394982	0.211015	0.476473	84
response.to.osmotic.stress	0.0669865	0.312084	0.595807	19
JNK.cascade	-0.0861254	0.0507282	0.209152	43
activation.of.JUN.kinase.activity	-0.0241128	0.616645	0.829053	36
response.to.heat	0.0879774	0.054219	0.216019	40
peptidyl.tyrosine.phosphorylation	-0.0475968	0.0719381	0.258123	120
positive.regulation.of.telomere.maintenance.via.telomerase	-0.0544778	0.278821	0.558963	33
stress.activated.MAPK.cascade	0.0792169	0.220033	0.486733	20
positive.regulation.of.telomerase.activity	-0.103998	0.0417615	0.185083	32
positive.regulation.of.telomere.capping	-0.150658	0.0369331	0.174231	16
bile.acid.biosynthetic.process	0.118913	0.0324667	0.161306	27
fatty.acid.beta.oxidation.using.acyl.CoA.oxidase	0.284163	0.000138637	0.0034496	15
alpha.linolenic.acid.metabolic.process	0.313779	8.94992e-05	0.00254271	13
diacylglycerol.binding	0.204593	0.0141222	0.0958349	12
manganese.ion.binding	0.0259547	0.494289	0.75103	58
beta.tubulin.binding	0.00821556	0.872228	0.950908	32
p53.binding	-0.00799342	0.825029	0.93208	64
regulation.of.mitotic.nuclear.division	-0.106496	0.108037	0.328512	19
methyl.CpG.binding	-0.0526687	0.371783	0.646828	24
regulation.of.DNA.methylation	-0.169142	0.0347134	0.167921	13
positive.regulation.of.oligodendrocyte.differentiation	-0.0378391	0.529892	0.773735	23
liver.regeneration	-0.0166051	0.761046	0.896997	28
nuclear.migration	-0.00710099	0.929357	0.973435	13
regulation.of.cell.size	0.0376523	0.559937	0.794139	20
negative.regulation.of.phosphatidylinositol.3.kinase.signaling	-0.0462272	0.579232	0.806855	12
myosin.II.binding	0.104775	0.251231	0.525803	10
regulation.of.protein.kinase.activity	-0.0664199	0.32926	0.611265	18
negative.regulation.of.mitotic.cell.cycle	-0.0832492	0.166963	0.417545	23
negative.regulation.of.protein.kinase.B.signaling	-0.0444772	0.318666	0.602064	42
telomere.maintenance	-0.122408	0.00739592	0.0646623	40
chromosome..telomeric.region	-0.192114	5.26796e-05	0.00177479	37
transcription.coactivator.binding	-0.110016	0.0968753	0.307081	19
telomerase.holoenzyme.complex	-0.106795	0.127384	0.3601	17
telomere.maintenance.via.telomerase	-0.140758	0.0336618	0.164538	19
positive.regulation.of.Wnt.signaling.pathway	0.024522	0.610678	0.825	36
production.of.siRNA.involved.in.RNA.interference	-0.0906395	0.320918	0.604382	10
positive.regulation.of.glucose.import	-0.0669855	0.176504	0.431567	34
response.to.cadmium.ion	0.00273147	0.963056	0.984172	24
positive.regulation.of.nitric.oxide.synthase.activity	-0.0295277	0.655896	0.848491	19
telomerase.RNA.binding	-0.120749	0.0684316	0.250704	19
replicative.senescence	-0.161	0.0534545	0.215118	12
positive.regulation.of.pri.miRNA.transcription.by.RNA.polymerase.II	-0.0698252	0.185639	0.443565	30
positive.regulation.of.vascular.smooth.muscle.cell.proliferation	0.00752855	0.882832	0.953056	32
positive.regulation.of.vascular.associated.smooth.muscle.cell.migration	-0.00258735	0.971416	0.986928	16
positive.regulation.of.stem.cell.proliferation	-0.179163	0.0396211	0.179355	11
negative.regulation.of.cellular.senescence	-0.125621	0.0650116	0.24268	18
negative.regulation.of.extrinsic.apoptotic.signaling.pathway.in.absence.of.ligand	-0.0943066	0.0535335	0.215208	35
mesoderm.development	-0.0905642	0.109961	0.33145	26
skin.development	0.172838	0.000402814	0.0077061	35
retinol.dehydrogenase.activity	0.109269	0.0907028	0.294127	20
androgen.biosynthetic.process	-0.199211	0.029145	0.151134	10
DNA.damage.checkpoint	-0.158417	0.00315188	0.0361422	29
condensed.nuclear.chromosome	-0.0295995	0.60846	0.82288	25
regulation.of.double.strand.break.repair.via.homologous.recombination	-0.108341	0.1335	0.369356	16
peptidyl.threonine.phosphorylation	-0.026508	0.443311	0.713107	70
positive.regulation.of.cell.cycle	-0.00588582	0.908269	0.962553	32
regulation.of.postsynaptic.membrane.potential	0.0420716	0.410165	0.681157	32
GABA.ergic.synapse	0.0867273	0.0156365	0.101932	65
integral.component.of.postsynaptic.membrane	0.173799	6.66004e-05	0.0021129	44
transmitter.gated.ion.channel.activity.involved.in.regulation.of.postsynaptic.membrane.potential	0.0853231	0.0806919	0.27428	35
visual.learning	0.0258165	0.544725	0.784719	46
response.to.mechanical.stimulus	0.0779944	0.0435563	0.190596	56
pancreas.development	-0.0160568	0.798937	0.919767	21
positive.regulation.of.mitotic.cell.cycle	-0.0323577	0.539635	0.781281	30
response.to.growth.factor	-0.00257806	0.973355	0.986928	14
lysosome.organization	0.0279372	0.551263	0.79025	38
serine.type.peptidase.activity	0.0868946	0.0221191	0.127394	58
protein.catabolic.process	0.0457561	0.348916	0.624506	35
peptide.binding	0.118573	0.0044902	0.0470914	48
peptide.catabolic.process	0.00455784	0.952913	0.981066	14
dopamine.receptor.signaling.pathway	-0.0704546	0.379074	0.652412	13
RNA.polymerase.II.repressing.transcription.factor.binding	-0.0464478	0.348655	0.624506	34
mitotic.sister.chromatid.segregation	-0.184877	0.000569601	0.0100598	29
chromosome..centromeric.region	-0.244621	4.56955e-09	4.8323e-07	48
branching.involved.in.blood.vessel.morphogenesis	-0.0550543	0.313325	0.59731	28
cell.migration.involved.in.sprouting.angiogenesis	-0.15078	0.0167592	0.105984	21
semaphorin.receptor.complex	0.125719	0.148774	0.391808	11
outflow.tract.septum.morphogenesis	-0.0190901	0.736176	0.884946	26
axonal.fasciculation	0.0157983	0.806774	0.922674	20
positive.regulation.of.smooth.muscle.cell.migration	0.0907111	0.182727	0.439724	18
semaphorin.receptor.activity	0.085422	0.305524	0.58726	12
growth.factor.binding	-0.076439	0.147349	0.390095	30
cytokine.binding	-0.214472	4.77498e-06	0.000242378	38
nerve.development	0.00476103	0.954458	0.981446	12
actin.cytoskeleton.reorganization	0.00548696	0.891155	0.955118	52
substrate.adhesion.dependent.cell.spreading	0.0730824	0.0738784	0.26212	50
cellular.response.to.hepatocyte.growth.factor.stimulus	0.0281003	0.706306	0.869651	15
endothelial.cell.migration	0.0606108	0.294188	0.575888	25
hepatocyte.growth.factor.receptor.signaling.pathway	-0.11678	0.161273	0.409583	12
negative.regulation.of.axon.extension.involved.in.axon.guidance	0.173388	0.0022125	0.0281705	26
artery.morphogenesis	-0.0692493	0.250302	0.524147	23
positive.chemotaxis	-0.0671549	0.152049	0.395774	38
semaphorin.plexin.signaling.pathway	0.127663	0.00999745	0.0756666	34
positive.regulation.of.substrate.adhesion.dependent.cell.spreading	0.131461	0.00798881	0.0686533	34
semaphorin.plexin.signaling.pathway.involved.in.axon.guidance	0.0524577	0.52919	0.773369	12
negative.regulation.of.extrinsic.apoptotic.signaling.pathway	-0.0298308	0.553173	0.791403	33
monocyte.chemotaxis	-0.0982419	0.036137	0.171967	38
tumor.necrosis.factor.receptor.binding	-0.237822	1.32768e-05	0.00054349	28
calcium.mediated.signaling	-0.0440041	0.196851	0.45668	72
osteoclast.differentiation	-0.0829142	0.110125	0.33147	31
positive.regulation.of.MAP.kinase.activity	-0.0756284	0.0483313	0.204177	57
positive.regulation.of.osteoclast.differentiation	-0.164138	0.00921809	0.0729216	21
positive.regulation.of.bone.resorption	-0.0855827	0.208726	0.474117	18
calcium.ion.homeostasis	-0.0304827	0.628688	0.836881	21
cytolysis	-0.0447325	0.499654	0.754001	19
intrinsic.component.of.membrane	0.0910658	0.318647	0.602064	10
killing.of.cells.of.other.organism	0.0357632	0.497823	0.752484	30
very.low.density.lipoprotein.particle	0.0141602	0.839809	0.936544	17
high.density.lipoprotein.particle	0.0520447	0.432231	0.702007	19
lipoprotein.metabolic.process	0.114459	0.0763845	0.268262	20
positive.regulation.of.lamellipodium.assembly	-0.0947324	0.18953	0.448998	16
positive.regulation.of.macrophage.chemotaxis	-0.0186293	0.802729	0.921469	15
response.to.muscle.activity	0.0137478	0.848999	0.939848	16
response.to.testosterone	-0.0735331	0.178079	0.433747	28
negative.regulation.of.kinase.activity	-0.15434	0.0539933	0.215916	13
negative.regulation.of.insulin.receptor.signaling.pathway	-0.0625114	0.213988	0.479207	33
muscle.cell.cellular.homeostasis	0.0523634	0.441812	0.712401	18
response.to.electrical.stimulus	-0.0675475	0.224435	0.492181	27
cellular.response.to.dexamethasone.stimulus	0.00445726	0.933793	0.973435	29
synaptic.vesicle.priming	0.067382	0.382678	0.655651	14
early.phagosome	-0.059528	0.51448	0.765372	10
terminal.bouton	0.0615274	0.14888	0.391808	46
calyx.of.Held	0.134052	0.0379492	0.176191	20
presynaptic.active.zone	0.110322	0.0282992	0.14902	33
innervation	0.0317165	0.632211	0.839223	19
hippocampal.mossy.fiber.to.CA3.synapse	0.10662	0.0432734	0.189576	30
RNA.polymerase.III.complex	0.0404549	0.587478	0.812574	15
positive.regulation.of.type.I.interferon.production	-0.0940864	0.0272886	0.145501	46
regulation.of.exocytosis	0.13545	0.0316536	0.159309	21
midbrain.development	-0.10453	0.0650591	0.24268	26
sympathetic.nervous.system.development	0.0287379	0.699962	0.866524	15
dopaminergic.neuron.differentiation	-0.00880828	0.894256	0.955764	19
sarcomere.organization	0.127288	0.00431898	0.0458005	42
antigen.binding	0.00743672	0.915456	0.964967	17
proteasome.core.complex	-0.00102143	0.988367	0.993225	17
Ras.guanyl.nucleotide.exchange.factor.activity	0.147154	0.0484595	0.204303	15
regulation.of.rhodopsin.mediated.signaling.pathway	0.152697	0.00961487	0.0739471	24
negative.regulation.of.peptidyl.threonine.phosphorylation	-0.00854706	0.90875	0.962553	15
Hsp70.protein.binding	0.01851	0.689197	0.863963	39
mitogen.activated.protein.kinase.kinase.kinase.binding	-0.00263959	0.969943	0.986527	17
regulation.of.MAP.kinase.activity	0.186017	0.0416468	0.185005	10
X2.oxoglutarate.metabolic.process	0.223097	0.00277429	0.0328004	15
ferrous.iron.binding	-0.0130697	0.82823	0.932586	23
cofactor.binding	0.100914	0.13827	0.377073	18
response.to.fatty.acid	0.1418	0.0661957	0.245143	14
negative.regulation.of.blood.pressure	0.0517024	0.352449	0.627877	27
regulation.of.insulin.receptor.signaling.pathway	0.0202801	0.8078	0.922681	12
cellular.response.to.fatty.acid	0.0192998	0.759475	0.896534	21
activation.of.innate.immune.response	-0.153021	0.0129712	0.0902683	22
positive.regulation.of.defense.response.to.virus.by.host	-0.172102	0.00632946	0.0593163	21
positive.regulation.of.interleukin.1.beta.production	-0.161192	0.0531692	0.214423	12
positive.regulation.of.cysteine.type.endopeptidase.activity	-0.0852436	0.35057	0.625994	10
regulation.of.transcription.involved.in.G1.S.transition.of.mitotic.cell.cycle	-0.14936	0.0131554	0.0912248	23
branched.chain.amino.acid.catabolic.process	0.247486	0.000187948	0.00420589	19
cellular.response.to.interferon.alpha	-0.149488	0.101627	0.317387	10
type.I.interferon.signaling.pathway	-0.0429791	0.227405	0.49367	66
response.to.organonitrogen.compound	-0.014576	0.835172	0.935201	17
leukotriene.biosynthetic.process	0.240524	0.00844045	0.0700061	10
glutathione.derivative.biosynthetic.process	0.169474	0.00869528	0.0707238	20
spliceosomal.complex.assembly	-0.0764835	0.274919	0.553766	17
spliceosomal.complex	-0.0635042	0.0813908	0.275672	63
import.into.nucleus	0.0209679	0.793493	0.916235	13
keratinocyte.differentiation	0.151501	7.67966e-06	0.000348053	73
cell.development	-0.076517	0.0825987	0.278081	43
mammary.gland.epithelial.cell.differentiation	-0.049885	0.533418	0.776471	13
cellular.response.to.peptide	-0.00685734	0.931775	0.973435	13
mitotic.cell.cycle.checkpoint	-0.20009	0.000148918	0.00363456	30
negative.regulation.of.chondrocyte.differentiation	-0.00335161	0.958616	0.982885	20
positive.regulation.of.smoothened.signaling.pathway	-0.00552847	0.917933	0.966419	29
embryonic.skeletal.system.morphogenesis	-0.026153	0.562346	0.795309	41
branching.involved.in.ureteric.bud.morphogenesis	0.00484784	0.914477	0.964967	41
regulation.of.protein.phosphorylation	-0.0273657	0.554326	0.791865	39
male.genitalia.development	-0.0680946	0.304148	0.585977	19
co.receptor.binding	-0.0740461	0.355256	0.63143	13
embryonic.cranial.skeleton.morphogenesis	-0.0214842	0.68885	0.863963	29
Rho.protein.signal.transduction	0.000453777	0.990143	0.99406	62
negative.regulation.of.protein.localization.to.cell.surface	-0.0611906	0.502803	0.754521	10
vesicle.membrane	0.101039	0.0745479	0.263513	26
myosin.binding	0.183446	0.00563527	0.0540389	19
dendritic.shaft	0.0708297	0.159121	0.406833	33
adult.behavior	0.0525672	0.327218	0.609245	29
integral.component.of.presynaptic.membrane	0.10489	0.00617433	0.0580387	57
synaptic.membrane.adhesion	0.041247	0.493504	0.750847	23
[truncated: 1,808 more rows]

## Sheet: MGI
	stat	pval	p.adj	num.genes
caudal body truncation	-0.020013	0.635646	0.824475	47
abnormal vitelline vascular remodeling	-0.0392752	0.271126	0.542638	66
induced chromosome breakage	-0.0334366	0.604954	0.807489	20
abnormal mature B cell morphology	-0.0846126	6.62028e-10	3.98262e-08	473
abnormal distortion product otoacoustic emission	0.10272	0.00984048	0.0633671	53
abnormal capillary morphology	-0.0703682	0.0222457	0.108728	89
hematoma	-0.0101251	0.869521	0.94371	22
increased anti-double stranded DNA antibody level	-0.127699	0.000137861	0.002101	75
abnormal blood volume	0.0268924	0.757528	0.887374	11
abnormal female meiosis	-0.109082	0.00661856	0.0478798	52
steatorrhea	0.0583171	0.503183	0.743716	11
abnormal large intestine crypts of Lieberkuhn morphology	-0.0163783	0.707482	0.862063	44
abnormal ependyma morphology	-0.0816088	0.158212	0.405801	25
abnormal T cell compartment	-0.109964	0.0085209	0.0572503	48
abnormal circulating interleukin-18 level	-0.118605	0.100669	0.311639	16
abnormal cell chemotaxis	-0.0158983	0.554442	0.779733	117
abnormal osteoclast morphology	-0.0420767	0.073378	0.249802	154
decreased plasma cell number	-0.143668	0.0227627	0.110479	21
abnormal gamma-delta T cell morphology	-0.0893351	0.0152358	0.0851323	62
colon polyps	-0.0916556	0.292699	0.56346	11
abnormal effector T cell morphology	-0.0776692	5.80764e-09	2.76589e-07	501
abnormal eosinophil physiology	-0.174935	0.00203865	0.0192577	26
retinal outer nuclear layer degeneration	0.0476808	0.419175	0.678156	24
abnormal secondary sex determination	-0.037847	0.288938	0.560053	66
kidney failure	0.00546722	0.886728	0.949888	57
impaired eosinophil recruitment	-0.195002	0.0054039	0.0412465	17
increased fibroblast apoptosis	-0.04458	0.330012	0.599688	40
abnormal eating behavior	0.0250263	0.0648796	0.227128	484
abnormal sensory neuron physiology	0.207664	1.38438e-07	5.06351e-06	54
abnormal leukocyte adhesion	-0.00330744	0.943108	0.976601	39
abnormal IgG2c level	-0.149529	0.0384862	0.1604	16
abnormal cardiac output	0.0885169	0.0664531	0.230694	36
abnormal conditioned taste aversion behavior	-0.0354622	0.612922	0.811591	17
abnormal melanosome morphology	-0.00240708	0.96131	0.98535	34
left-sided isomerism	-0.0594648	0.323957	0.594646	23
small petrosal ganglion	0.0169507	0.845709	0.930138	11
decreased pre-B cell number	-0.110422	0.00114422	0.0121676	73
decreased cell death	-0.0263127	0.206675	0.473422	197
abnormal epidermis stratum granulosum morphology	0.122781	0.00113705	0.0121462	59
abnormal molar crown morphology	-0.0475611	0.485091	0.729396	18
abnormal mesenteric fat pad morphology	-0.100692	0.0948769	0.299353	23
pulmonary valve stenosis	0.0963065	0.268894	0.541841	11
abnormal dendritic cell number	-0.0880664	0.00490738	0.0380926	86
increased response of heart to induced stress	0.0306081	0.503624	0.743798	40
abnormal liver cholesterol level	0.0118341	0.78395	0.897901	45
abnormal semicircular canal morphology	-0.00477671	0.900101	0.956371	58
thin retinal ganglion layer	0.0256415	0.72266	0.869016	16
decreased retinal photoreceptor cell number	0.0972356	0.0120298	0.0733281	56
abnormal myeloid cell number	-0.0347676	0.0168994	0.0904331	416
enophthalmos	0.00615796	0.946256	0.977859	10
abnormal squamosal bone morphology	0.0321337	0.578464	0.795794	25
abnormal circulating phospholipid level	0.109711	0.141454	0.383359	15
abnormal monocyte morphology	-0.0657148	0.0070055	0.0500707	143
abnormal olfactory bulb glomerular layer morphology	0.120953	0.146999	0.391437	12
abnormal circulating gastrin level	0.0337221	0.712021	0.863555	10
abnormal diencephalon morphology	-0.00435327	0.816357	0.914738	245
abnormal heart right ventricle morphology	0.00209523	0.929865	0.970447	150
increased thigmotaxis	0.00946316	0.810308	0.910924	54
abnormal tail movements	0.0863795	0.0453643	0.179107	45
small gonad	-0.0640103	1.22465e-05	0.000266623	411
abnormal compact bone morphology	0.0109607	0.660787	0.838587	136
abnormal postnatal growth	0.0231478	0.0319242	0.14212	799
cardiac edema	0.0311612	0.733021	0.874996	10
abnormal B-1a B cell morphology	-0.108297	0.0130945	0.077852	44
abnormal cerebellum lobule morphology	0.00783485	0.800173	0.904199	88
alpha beta T cell morphology	-0.0937489	0.000107395	0.0017078	145
abnormal sinoatrial node conduction	0.076368	0.113318	0.336412	36
postnatal growth retardation	0.0195076	0.0739724	0.251425	778
microcephaly	-0.00570446	0.867466	0.942867	72
abnormal Muller cell morphology	0.0391426	0.565586	0.786041	18
decreased red blood cell distribution width	0.143568	0.116046	0.340542	10
abnormal digestive organ placement	-0.183398	0.00188804	0.0182884	24
decreased circulating corticosterone level	-0.0357736	0.470944	0.722407	34
abnormal retinal layer morphology	0.0162185	0.310522	0.583249	341
abnormal glycogen homeostasis	0.0177961	0.502874	0.743716	120
nervous system phenotype	0.040644	4.54024e-09	2.23911e-07	2645
abnormal sphingolipid level	0.0591229	0.517506	0.755198	10
liver/biliary system phenotype	-0.0194056	0.0507676	0.191826	966
abnormal definitive hematopoiesis	-0.0847637	5.61354e-15	2.13876e-12	789
increased liver triglyceride level	0.0449729	0.171057	0.422292	78
abnormal kidney cortex morphology	-0.0340894	0.0432947	0.172914	305
decreased circulating glucose level	0.0191506	0.242571	0.517998	324
double aortic arch	0.0105321	0.899512	0.956365	12
aorticopulmonary septal defect	0.0366848	0.283192	0.555213	72
abnormal free fatty acids level	0.0327691	0.138814	0.379573	174
abnormal T cell number	-0.0823388	2.22138e-12	2.52936e-10	663
abnormal synaptic plasticity	0.108994	0.00842975	0.0571899	49
increased hematopoietic stem cell number	-0.0586768	0.152	0.397844	50
abnormal neuronal precursor cell number	-0.0326504	0.411923	0.674117	53
wrinkled skin	0.127357	0.0158845	0.0869748	30
abnormal ear physiology	0.0466715	0.00308856	0.0266738	351
abnormal long term potentiation	0.0369942	0.0744045	0.25217	199
abnormal tendon morphology	0.0404992	0.428411	0.687614	32
decreased platelet aggregation	0.0505971	0.212229	0.479037	51
increased susceptibility to fungal infection	-0.0605742	0.304748	0.577657	24
decreased susceptibility to hepatic steatosis	0.0316075	0.3868	0.654981	63
decreased susceptibility to neuronal excitotoxicity	0.0272799	0.593739	0.801326	32
absent inguinal lymph nodes	-0.252659	0.00567911	0.0426353	10
decreased susceptibility to induced choroidal neovascularization	0.0874299	0.338536	0.607177	10
abnormal pulmonary elastic fiber morphology	-0.00521785	0.940662	0.975353	17
abnormal hindbrain development	0.0140158	0.552171	0.778107	153
absent oocytes	-0.231812	0.000169335	0.00250551	22
abnormal Bergmann glial cell morphology	0.0445303	0.609201	0.80905	11
decreased uterus weight	0.00515138	0.936479	0.973705	20
altered susceptibility to kidney reperfusion injury	-0.0246779	0.709786	0.862754	19
abnormal germinal center B cell number	-0.043899	0.298674	0.570612	47
abnormal intercostal muscle morphology	0.0529316	0.543412	0.772829	11
small heart	-0.0510181	0.0294175	0.133757	155
common atrioventricular valve	-0.169595	0.051537	0.194251	11
lethality throughout fetal growth and development	-0.0263022	0.0807118	0.266629	387
abnormal oviduct morphology	-0.0828412	0.211575	0.478705	19
increased insulin secretion	-0.0468432	0.300114	0.572194	41
abnormal embryonic-extraembryonic boundary morphology	-0.0349873	0.514785	0.75291	29
abnormal cardiac valve physiology	0.0345366	0.584059	0.799006	21
increased vascular endothelial cell number	-0.0495011	0.569845	0.788527	11
decreased susceptibility to viral infection	-0.0904717	0.0257102	0.120314	51
absent mandible	-0.0818968	0.205154	0.472121	20
abnormal neural fold formation	-0.0195624	0.720413	0.867684	28
abnormal central pattern generator function	0.229407	0.00297268	0.0259372	14
abnormal passive avoidance behavior	0.0513926	0.244396	0.518987	43
increased mitochondria size	-0.0582507	0.367492	0.636818	20
spongiform encephalopathy	-0.0204896	0.776718	0.895174	16
prolonged P wave	0.0932679	0.263453	0.536156	12
abnormal neuromere morphology	-0.051495	0.437427	0.694174	19
abnormal maxillary shelf morphology	0.00565596	0.92056	0.965339	26
abnormal CD8-positive, alpha-beta memory T cell number	-0.107555	0.136572	0.375471	16
decreased lumbar vertebrae number	-0.109318	0.014393	0.0821532	42
abnormal fertility/fecundity	-0.0263197	0.00434544	0.0346725	1151
increased bone trabecula number	0.0293311	0.511414	0.749672	42
dextrocardia	-0.100902	0.056055	0.20585	30
decreased IgG2b level	-0.232714	2.58992e-10	1.71611e-08	62
short radius	-0.00590447	0.896085	0.954543	41
abnormal plasmacytoid dendritic cell morphology	-0.125685	0.0819273	0.269476	16
abnormal chromosome number	-0.128174	0.000296616	0.00407246	67
increased osteoblast cell number	0.037129	0.454303	0.708658	34
increased dendritic cell number	-0.0375089	0.418327	0.677713	39
increased triglyceride level	0.0281874	0.175079	0.428513	198
abnormal NK T cell physiology	-0.234748	0.00115745	0.0122497	16
abnormal astrocyte physiology	0.112235	0.0572258	0.208975	24
wavy neural tube	-0.0109945	0.822142	0.91588	35
abnormal sternum morphology	-0.03714	0.0915938	0.292844	176
abnormal baroreceptor physiology	0.165419	0.0575606	0.209696	11
environmentally induced seizures	0.0287949	0.579429	0.796115	31
decreased threshold for auditory brainstem response	0.0556036	0.523254	0.760206	11
increased noradrenaline level	0.124612	0.172542	0.423891	10
abnormal prenatal growth/weight/body size	-0.034396	0.00101652	0.0112259	856
distended abdomen	0.000480453	0.988333	0.995197	78
abnormal limbic system morphology	0.0373514	0.0232619	0.111802	321
abnormal follicle stimulating hormone level	-0.0355721	0.301399	0.573686	71
increased adrenocorticotropin level	-0.0915775	0.146595	0.391437	21
abnormal CD4-positive T cell differentiation	-0.106708	0.00108171	0.0117752	79
increased lung adenocarcinoma incidence	-0.0254515	0.496366	0.739454	60
decreased IgM level	-0.136416	2.67367e-06	7.14856e-05	100
increased susceptibility to experimental autoimmune encephalomyelitis	-0.144503	0.00014611	0.00218305	58
absent epidermis stratum corneum	0.107096	0.24106	0.516703	10
abnormal dendritic spine morphology	-0.0608748	0.163108	0.413375	44
increased cerebral infarction size	0.00476025	0.931841	0.970447	27
abnormal endocrine gland physiology	-0.0122466	0.455551	0.709787	323
abnormal lacrimal apparatus physiology	-0.124485	0.0541207	0.201417	20
crypts of Lieberkuhn abscesses	-0.0693748	0.369014	0.638581	14
increased interleukin-12b secretion	-0.0687788	0.373142	0.642079	14
thin epidermis	0.057447	0.254016	0.528307	33
abnormal left lung morphology	-0.1884	0.0028221	0.0250537	21
abnormal Reissner membrane morphology	-0.0190436	0.81939	0.915429	12
abnormal cochlear potential	0.206245	0.00430839	0.034437	16
increased megakaryocyte cell number	-0.0696649	0.11047	0.330542	44
abnormal chondrocyte physiology	-0.0287859	0.591996	0.801245	29
abnormal B cell differentiation	-0.0945021	1.03197e-07	3.96484e-06	274
abnormal retinal apoptosis	0.0303454	0.46786	0.720949	48
increased diameter of long bones	0.0239447	0.614756	0.811814	37
abnormal epididymis morphology	-0.0611137	0.0580734	0.210891	81
complete preweaning lethality	0.0159056	0.291468	0.56275	386
abnormal hepatobiliary system physiology	-0.0262207	0.0891138	0.28672	368
hairpin sperm flagellum	-0.159216	0.0328527	0.144704	15
increased B cell number	-0.0907723	2.52079e-06	6.81955e-05	231
increased circulating erythropoietin level	-0.0254823	0.769874	0.891622	11
abnormal gastrocnemius weight	0.0552422	0.525958	0.76157	11
abnormal sphenoid bone morphology	0.0473456	0.168982	0.42003	71
abnormal bony labyrinth	-0.0257667	0.767379	0.89115	11
intracerebral hemorrhage	-0.00167551	0.972672	0.989867	35
decreased hippocampus pyramidal cell number	0.0607428	0.466432	0.719476	12
decreased body length	-0.00965648	0.61586	0.811814	232
impaired synaptic plasticity	0.108955	0.0281087	0.129188	34
abnormal corticosterone level	0.00110013	0.972129	0.989867	85
decreased tumor latency	-0.0770628	0.100708	0.311639	38
abnormal dendritic cell antigen presentation	-0.0940227	0.0545588	0.202306	35
impaired limb coordination	0.0233332	0.526191	0.76157	62
abnormal pancreatic islet size	-0.00346664	0.908367	0.960382	93
increased susceptibility to bacterial infection induced morbidity/mortality	-0.106952	0.00121854	0.0128072	77
abnormal compact bone area	0.0668914	0.326158	0.596467	18
abnormal T cell activation	-0.100351	8.64725e-10	5.00446e-08	325
abnormal NK cell differentiation	-0.0879142	0.254959	0.529211	14
abnormal bone remodeling	-0.0252952	0.271309	0.542638	161
fusion of atlas and occipital bones	0.0748471	0.390199	0.657087	11
abnormal fornicate gyrus morphology	0.0660388	0.428481	0.687614	12
abnormal vascular endothelial cell migration	-0.052061	0.515919	0.753605	13
abnormal direction of heart looping	0.0252667	0.59536	0.801326	37
abnormal axial mesoderm	-0.033517	0.632538	0.823043	17
abnormal immunoglobulin heavy chain V(D)J recombination	0.0300976	0.729699	0.872219	11
abnormal lens induction	-0.000560772	0.994003	0.997056	15
impaired neutrophil recruitment	-0.0191114	0.624708	0.817128	55
osteopetrosis	0.00409108	0.930561	0.970447	38
impaired behavioral response to morphine	0.124775	0.15202	0.397844	11
abnormal bone mineral density	-0.00450868	0.793513	0.902663	292
increased B-1 B cell number	-0.198595	0.000594874	0.00712645	25
abnormal fetal cardiomyocyte physiology	-0.021378	0.624283	0.817126	44
abnormal hindlimb stylopod morphology	0.0292907	0.227798	0.497845	144
lymph node hyperplasia	-0.153422	0.00231672	0.0215285	33
increased total fat pad weight	0.0796527	0.255816	0.529211	17
eyelids fail to open	0.0263463	0.648707	0.830205	25
abnormal cytotoxic T cell physiology	-0.128695	0.000110195	0.00173729	76
abnormal sperm nucleus morphology	-0.045557	0.503674	0.743798	18
lymphoid hypoplasia	0.0392187	0.624562	0.817128	13
abnormal erythroid lineage cell morphology	-0.0304066	0.0119821	0.0731401	619
broad limb buds	0.0204353	0.822993	0.916396	10
abnormal thymus weight	0.0106336	0.799193	0.904027	48
abnormal postural reflex	0.0556561	0.033929	0.147532	123
abnormal myeloid dendritic cell morphology	-0.0808697	0.113807	0.336698	32
cleft palate	-0.0109479	0.572721	0.790842	228
abnormal cortical plate morphology	0.0117734	0.817925	0.914988	32
lymphoid hyperplasia	-0.152144	0.00851962	0.0572503	25
abnormal heart right ventricle pressure	0.00981071	0.891987	0.952503	16
abnormal tarsal bone morphology	0.0028536	0.951533	0.981369	38
small geniculate ganglion	0.0619549	0.476928	0.726839	11
impaired adaptive thermogenesis	0.127712	0.00381892	0.0312905	43
increased circulating total protein level	-0.0568915	0.431024	0.688795	16
other phenotype	0.0115695	0.626962	0.818758	150
increased variability of skeletal muscle fiber size	0.118492	0.00962262	0.0625812	40
decreased prostaglandin level	0.10996	0.154488	0.402232	14
abnormal skeleton physiology	-0.0203721	0.114467	0.337642	538
abnormal testis morphology	-0.046574	0.00050467	0.00628706	497
increased hepatocyte apoptosis	-0.0621483	0.114941	0.33805	54
abnormal brain internal capsule morphology	0.00712907	0.905868	0.959821	23
abnormal apocrine gland morphology	-0.0188533	0.415126	0.675303	159
enlarged heart	0.00853585	0.581922	0.798244	364
increased teratoma incidence	-0.241517	0.000569978	0.00693069	17
increased retroperitoneal fat pad weight	-0.0333905	0.665475	0.839721	14
increased susceptibility to otitis media	-0.100451	0.095671	0.300417	23
mesangial cell hyperplasia	-0.13431	0.00973557	0.0630468	31
increased keratinocyte proliferation	-0.0083103	0.861335	0.940965	37
clonic seizures	0.0959056	0.214286	0.481434	14
decreased marginal zone B cell number	-0.116191	0.00123322	0.0128728	65
decreased thymus weight	0.0429756	0.386443	0.654862	34
abnormal frontonasal prominence morphology	0.0181099	0.808225	0.909264	15
liver hemorrhage	0.0815409	0.105437	0.321382	33
abnormal iris stroma morphology	0.0253944	0.742286	0.878522	14
abnormal submandibular gland physiology	-0.177068	0.033752	0.14712	12
abnormal hippocampus neuron morphology	0.0639018	0.0311489	0.139075	96
gliosis	0.0177157	0.442436	0.699453	160
abnormal lactotroph morphology	0.0536064	0.458106	0.712401	16
interstitial pneumonia	-0.179621	0.0160684	0.0876669	15
scoliosis	-0.0442446	0.345985	0.614276	38
abnormal cornea thickness	-0.00713023	0.899951	0.956371	26
herniated abdominal wall	0.0161236	0.793642	0.902663	22
tumorigenesis	-0.0516806	7.15068e-06	0.000166801	691
intestinal hypoperistalsis	0.033614	0.663372	0.839435	14
asthenozoospermia	-0.0712649	0.00392779	0.031872	139
abnormal external auditory canal morphology	0.0537037	0.471673	0.722441	15
abnormal spleen marginal zone morphology	-0.145085	6.87484e-08	2.7332e-06	117
small kidney	-0.0312101	0.151764	0.39763	180
abnormal respiratory system physiology	-0.019438	0.0812887	0.268341	742
abnormal proximal-distal axis patterning	-0.104868	0.250991	0.526632	10
embryonic growth arrest	-0.01031	0.579354	0.796115	249
maternal imprinting	-0.236933	0.000172784	0.00254828	21
absent heartbeat	-0.0107954	0.864125	0.941171	21
abnormal foot pad morphology	-0.0336994	0.620837	0.814496	18
arrhythmic circadian persistence	0.104724	0.251639	0.526784	10
decreased triiodothyronine level	0.102189	0.113891	0.336698	20
cardiovascular system phenotype	-0.00294955	0.696156	0.855138	1962
abnormal heart weight	-0.0136147	0.478412	0.727038	233
small pancreas	-0.02946	0.525	0.760793	39
impaired febrile response	-0.199382	0.0168228	0.0902745	12
abnormal exocrine gland morphology	-0.0286512	0.0246793	0.116684	552
abnormal chemically-elicited antinociception	0.110699	0.0392997	0.162311	29
abnormal retinal inner nuclear layer morphology	0.0852155	0.0206227	0.10384	62
small endolymphatic duct	0.0359507	0.693922	0.854	10
abnormal inner hair cell stereociliary bundle morphology	0.135415	0.00717191	0.0508372	33
abnormal spleen iron level	-0.0350614	0.544347	0.773626	25
decreased circulating estrogen level	-0.111353	0.0416213	0.168103	28
abnormal lymphatic system physiology	0.0141761	0.859588	0.93967	13
enlarged allantois	-0.0828795	0.251323	0.526784	16
abnormal prostate gland epithelium morphology	-0.0190221	0.786105	0.898577	17
abnormal terminal bronchiole morphology	0.122974	0.140363	0.381762	12
abnormal small intestinal crypt cell physiology	0.0111389	0.866603	0.942686	19
small maxilla	-0.0251681	0.53097	0.764897	52
abnormal brain vasculature morphology	0.00331123	0.936861	0.973705	48
abnormal IgG level	-0.111704	6.21399e-13	8.60921e-11	363
absent immature B cells	-0.0116067	0.876382	0.94545	15
rib bifurcation	-0.0212228	0.702971	0.859584	27
abnormal adipose tissue physiology	-0.00222401	0.945691	0.977549	79
decreased palatine bone horizontal plate size	-0.144253	0.114319	0.337436	10
abnormal dorsal telencephalic commissure morphology	0.00881061	0.750648	0.883436	110
decreased single-positive T cell number	-0.105709	0.0037991	0.031184	63
cochlear degeneration	0.0895681	0.0230952	0.111542	54
impaired learning	0.108858	0.00727755	0.0512681	51
abnormal colon morphology	-0.043793	0.133724	0.371941	99
decreased myocardial infarction size	0.00181248	0.974998	0.991039	25
abnormal pterygoid process morphology	0.0453797	0.451614	0.706731	23
decreased mesenteric fat pad weight	-0.0364142	0.662401	0.839256	12
alpha-beta T cell physiology	-0.113112	7.5637e-09	3.45812e-07	224
increased CD4-positive	-0.0844221	0.000990045	0.0109866	129
abnormal auditory brainstem response waveform shape	0.0537769	0.271544	0.542638	35
increased mammary adenocarcinoma incidence	-0.0365012	0.387509	0.655453	47
liver vascular congestion	0.0145146	0.822329	0.91588	20
decreased epididymis weight	-0.146695	0.0232389	0.111802	20
abnormal sperm capacitation	-0.217507	0.00911046	0.0599324	12
sensorineural hearing impairment	-0.0352343	0.497671	0.740434	31
abnormal cerebellum morphology	0.0215081	0.176256	0.430702	345
abnormal epididymis size	-0.0987178	0.0354939	0.151995	38
abnormal macrophage derived foam cell morphology	-0.010361	0.909699	0.960382	10
abnormal sympathetic system morphology	-0.0478101	0.296176	0.568957	40
increased mouth tumor incidence	-0.0774873	0.315683	0.586882	14
decreased circulating pituitary hormone level	-0.0592851	0.0693953	0.239272	79
abnormal tail development	0.00474611	0.926059	0.968601	32
macrophthalmia	0.0378648	0.63657	0.824475	13
altered susceptibility to bacterial infection	-0.0713331	7.94658e-06	0.000182572	342
shiny skin	0.15302	0.0069733	0.0499717	26
abnormal lung position or orientation	-0.113211	0.0189066	0.097453	36
small pituitary gland	0.00291721	0.95977	0.98535	25
abnormal immune cell physiology	-0.0646535	4.31779e-13	6.58031e-11	1250
abnormal heart size	-0.0106194	0.432981	0.689992	485
blistering	0.181499	0.00111011	0.0119142	27
pancreas hypoplasia	0.00742961	0.932028	0.970447	11
abnormal chorioallantoic fusion	-0.0225731	0.533342	0.766323	64
abnormal skeletal muscle fiber type ratio	0.127394	0.0142075	0.0813993	31
vascular smooth muscle cell hyperplasia	-0.081693	0.32734	0.596523	12
abnormal seminal vesicle size	-0.0784965	0.0408365	0.166255	57
abnormal neuromuscular synapse morphology	0.112339	0.000680234	0.00791356	77
abnormal apocrine gland physiology	0.00014204	0.996318	0.998064	89
abnormal circulating fructosamine level	0.10599	0.119754	0.346967	18
abnormal cardiac cell glucose uptake	0.157371	0.049556	0.188875	13
waved hair	0.0564132	0.371189	0.640665	21
iris synechia	0.0581012	0.345876	0.614276	22
abnormal incisor color	0.0744429	0.415131	0.675303	10
abnormal head mesenchyme morphology	0.0165624	0.731287	0.87319	36
increased lung non-small cell carcinoma incidence	-0.0300761	0.413931	0.674721	62
fused dorsal root ganglion	-0.126037	0.147919	0.392988	11
abnormal afterhyperpolarization	0.160824	0.0311278	0.139075	15
increased lung compliance	0.191862	0.0129773	0.0772553	14
lymphangiectasis	-0.110526	0.204493	0.471955	11
abnormal liver physiology	-0.0342412	0.0330017	0.144753	338
abnormal T-helper 1 cell morphology	-0.165963	0.000101367	0.00162615	46
abnormal immunoglobulin level	-0.103208	2.21332e-13	4.04772e-11	447
deafness	0.0793982	0.00910748	0.0599324	91
abnormal gastrocnemius morphology	0.144956	0.0249238	0.117657	20
abnormal sperm head morphology	-0.0438854	0.170944	0.422292	82
decreased circulating cholesterol level	-0.00178703	0.930489	0.970447	204
abnormal placenta physiology	0.0336949	0.584615	0.799006	22
abnormal keratinocyte differentiation	0.0927986	0.0653906	0.228567	33
skeletal muscle atrophy	0.0893542	0.071742	0.244666	34
increased reproductive system tumor incidence	-0.11138	0.000510995	0.00634856	82
absent supraoccipital bone	-0.0582888	0.523432	0.760206	10
abnormal conditioned place preference behavior	0.0398079	0.429287	0.688043	33
podocyte foot process effacement	-0.0201731	0.667424	0.840777	38
decreased total fat pad weight	0.0514341	0.463092	0.717227	17
abnormal adenohypophysis morphology	-0.0323318	0.361401	0.631105	67
decreased megakaryocyte cell number	-0.141701	0.0215098	0.105973	22
abnormal fertilization	-0.0363128	0.220691	0.490101	96
abnormal calcium ion homeostasis	0.0168492	0.515864	0.753605	126
abnormal pancreas size	-0.0129146	0.738725	0.877509	56
abnormal brain morphology	0.00669351	0.442228	0.699366	1328
pulmonary hypoplasia	0.0294015	0.468521	0.721239	51
absence seizures	0.0144345	0.774413	0.893661	33
abnormal retinal nerve fiber layer morphology	-0.0569038	0.430925	0.688795	16
abnormal heart and great artery attachment	-0.0177974	0.426702	0.686336	170
stomach inflammation	-0.104003	0.0489153	0.188317	30
abnormal thyroid gland development	-0.00481396	0.952099	0.981376	13
decreased B cell proliferation	-0.130387	2.52595e-05	0.000479196	88
increased prolactin level	-0.110009	0.228502	0.498785	10
increased liver iron level	-0.0311379	0.582979	0.798862	26
abnormal cranial nerve morphology	0.0347569	0.103011	0.315448	188
abnormal secretory circumventricular organ morphology	0.00567367	0.937407	0.974051	16
abnormal cerebellar molecular layer	-0.00112522	0.977654	0.992233	52
abnormal hair follicle development	0.0619808	0.0948909	0.299353	61
abnormal cerebellar granule cell precursor proliferation	-0.102735	0.238234	0.513051	11
abnormal brown fat cell size	0.169665	0.0419257	0.169183	12
abnormal somatotroph morphology	-0.0113266	0.854202	0.935428	22
fetal growth retardation	-0.030114	0.347462	0.61502	82
decreased motor neuron number	-0.0255488	0.494721	0.737725	60
decreased embryo weight	-0.0430864	0.550933	0.777668	16
abnormal rhombomere morphology	-0.051495	0.437427	0.694174	19
abnormal neutrophil morphology	-0.0161032	0.378439	0.646329	258
abnormal liver parenchyma morphology	-0.0124777	0.565567	0.786041	181
abnormal hypothalamus morphology	0.0737578	0.131544	0.368288	35
abnormal dendritic cell differentiation	-0.0792422	0.258275	0.531428	17
abnormal fasted circulating glucose level	0.0430989	0.25736	0.53026	58
increased susceptibility to diet-induced obesity	0.0175775	0.68055	0.847941	46
epidermal hyperplasia	0.0404437	0.212588	0.479502	80
abnormal erythrocyte morphology	-0.0301146	0.0166499	0.0898739	569
short tail	-0.0106712	0.723112	0.869278	93
decreased epididymal fat pad weight	-0.0457612	0.283787	0.555768	46
decreased circulating creatinine level	0.019737	0.654837	0.834889	43
increased white adipose tissue amount	-0.0147689	0.723848	0.869759	48
enlarged sebaceous gland	0.0708853	0.220315	0.490101	25
abnormal long bone epiphyseal ossification zone morphology	0.0830563	0.319332	0.591326	12
abnormal estrous cycle	-0.0438235	0.163997	0.414938	85
enlarged prostate gland	-0.0971056	0.165955	0.416986	17
abnormal bronchiole epithelium morphology	-0.0151157	0.797871	0.904027	24
thin retinal outer nuclear layer	0.0290202	0.377089	0.645229	78
decreased insulin secretion	0.0196816	0.483756	0.729223	107
decreased CD4-positive, alpha beta T cell number	-0.0649591	0.116405	0.341112	49
intracranial hemorrhage	0.0257909	0.391833	0.658141	93
abnormal circulating bicarbonate level	0.063608	0.350465	0.61866	18
retina hypoplasia	-0.0385638	0.672921	0.84429	10
abnormal lip morphology	0.0309124	0.564929	0.785778	29
abnormal developmental patterning	-0.0290085	0.0424677	0.170767	432
abnormal sarcolemma morphology	0.164964	0.0326723	0.144326	14
atelectasis	0.0412625	0.16622	0.417198	95
abnormal progesterone level	-0.00955777	0.834573	0.924114	40
decreased retinal cone cell number	0.0794801	0.256848	0.529728	17
absent corpus luteum	-0.0895093	0.0207929	0.104149	56
abnormal grip strength	0.0418598	0.0360716	0.153271	215
decreased fetal weight	-0.0487772	0.211835	0.478705	55
abnormal erythropoiesis	-0.0760197	0.00488404	0.038087	116
abnormal lateral ganglionic eminence morphology	0.0532907	0.475088	0.725	15
adipose tissue phenotype	0.0049924	0.660676	0.838587	710
microgliosis	-0.0078671	0.855373	0.936262	45
abnormal pulmonary alveolus wall morphology	0.0176705	0.795341	0.903653	18
impaired balance	0.0623611	0.0238636	0.114061	111
intraventricular hemorrhage	0.0341235	0.636708	0.824475	16
increased renin activity	0.047543	0.538142	0.769591	14
increased interleukin-2 secretion	-0.178002	2.05901e-05	0.00041654	48
abnormal bile duct physiology	-0.0149811	0.776662	0.895174	30
abnormal triiodothyronine level	0.0921897	0.0759997	0.25506	31
hypochromic microcytic anemia	0.00394342	0.962289	0.98535	12
no suckling reflex	0.0885522	0.251527	0.526784	14
decreased spleen weight	-0.0836755	0.0190502	0.0978623	66
abnormal placental labyrinth vasculature morphology	0.0160331	0.621205	0.814496	80
abnormal platelet cell number	-0.0551844	0.00594446	0.044192	213
abnormal liver lobule morphology	-0.0155554	0.483502	0.729223	173
abnormal adrenal gland secretion	0.0127006	0.844228	0.929113	20
decreased circulating tumor necrosis factor level	-0.106776	0.0144322	0.0822742	44
decreased B cell number	-0.0929536	1.9309e-09	1.05096e-07	365
decreased circulating gonadotropin level	-0.0688564	0.0995012	0.309309	48
increased transitional stage B cell number	-0.104147	0.0486038	0.188	30
abnormal PR interval	0.0093566	0.838006	0.926345	40
abnormal nose morphology	0.0464424	0.0700272	0.240504	129
right aortic arch	-0.0172443	0.676833	0.846411	49
abnormal maternal behavior	0.133859	8.93418e-07	2.6184e-05	114
abnormal pupillary reflex	0.0405892	0.500779	0.742641	23
decreased startle reflex	0.130279	2.08149e-05	0.000419233	90
increased bone mineral density	-0.00195581	0.949901	0.980128	87
arteriosclerosis	-0.027154	0.56301	0.784809	38
decreased macrophage apoptosis	-0.220082	0.00832122	0.056614	12
short ulna	0.0383806	0.363541	0.632944	47
abnormal abdominal fat pad morphology	-0.0243337	0.242892	0.518037	197
decreased hepatocyte proliferation	0.0505797	0.372477	0.641658	26
abnormal radius morphology	0.0488983	0.14979	0.395633	73
thin cortical plate	-0.0622156	0.475076	0.725	11
abnormal interventricular septum membranous part morphology	-0.0178747	0.644337	0.829001	56
abnormal tibialis anterior morphology	0.142082	0.0370166	0.155981	18
abnormal voluntary movement	0.0542326	7.17064e-10	4.25769e-08	1294
omphalocele	-0.0251961	0.542537	0.772494	49
partial preweaning lethality	-0.0146068	0.417489	0.676865	266
abnormal miniature excitatory postsynaptic currents	0.0791781	0.018879	0.097453	74
abnormal intercellular signaling peptide or protein level	-0.0933855	1.97424e-09	1.06191e-07	361
abnormal mechanoreceptor morphology	0.0879217	3.2342e-05	0.00059147	191
abnormal sebaceous gland physiology	0.0271827	0.754994	0.886222	11
abnormal estrus	-0.135603	0.0215896	0.106092	24
abnormal germinal center B cell morphology	-0.043899	0.298674	0.570612	47
abnormal motor neuron morphology	0.0262074	0.278913	0.550807	145
abnormal incisor morphology	0.0154086	0.608937	0.80905	93
absent maxillary shelf	0.0249787	0.774297	0.893661	11
abnormal airway responsiveness	-0.140319	0.00115024	0.0122016	45
premature intramembranous bone ossification	0.0212489	0.7989	0.904027	12
abnormal QRS complex	0.00475232	0.911369	0.960382	46
impaired olfaction	0.17404	0.00867704	0.0579145	19
open neural tube	-0.0358578	0.0852812	0.277711	197
increased interleukin-13 secretion	0.0593991	0.314226	0.586384	24
abnormal lymphangiogenesis	0.0295526	0.734408	0.875499	11
decreased prepulse inhibition	0.0185257	0.560933	0.784499	83
increased embryonic neuroepithelium apoptosis	-0.0930855	0.17182	0.423255	18
abnormal tail length	-0.0039202	0.893746	0.953384	98
abnormal dermomyotome development	-0.0830998	0.319078	0.591097	12
abnormal intestinal epithelium morphology	-0.0115375	0.584517	0.799006	192
decreased T cell number	-0.0831703	4.36567e-10	2.7722e-08	502
abnormal hematopoietic system physiology	-0.0614235	5.55091e-13	7.93087e-11	1406
abnormal liver regeneration	-0.106219	0.0409127	0.166417	31
decreased tympanic ring size	-0.0530455	0.449197	0.704561	17
absent optic nerve	-0.0726958	0.364331	0.633768	13
abnormal quadriceps morphology	0.127972	0.0477233	0.185667	20
abnormal ureteric bud elongation	-0.0487764	0.499601	0.741856	16
abnormal retinal pigmentation	-0.0182884	0.595201	0.801326	71
coiled sperm flagellum	-0.0517603	0.460261	0.714265	17
abnormal pancreas physiology	-0.0189704	0.314416	0.586499	242
abnormal canal of Schlemm morphology	0.0918156	0.291857	0.563025	11
decreased follicle stimulating hormone level	-0.0428625	0.355048	0.624008	39
abnormal limb bone morphology	0.00859501	0.586848	0.799006	349
increased basophil cell number	-0.0892648	0.284497	0.556816	12
abnormal hematopoietic stem cell physiology	-0.0961335	0.0214575	0.105829	48
decreased percent body fat	0.0434984	0.155313	0.403003	90
absent mesoderm	-0.0205777	0.595104	0.801326	56
decreased interleukin-12 secretion	-0.159469	0.0018195	0.0177372	32
abnormal spongiotrophoblast cell morphology	-0.222598	0.0106048	0.0666918	11
palatal shelf hypoplasia	-0.0301352	0.696377	0.85518	14
abnormal coronal suture morphology	-0.0138994	0.873222	0.944354	11
abnormal spongiotrophoblast layer morphology	-0.0801853	0.0307199	0.137968	61
abnormal metabolism	0.00952218	0.446082	0.702373	577
abnormal motile primary cilium morphology	-0.0540206	0.283444	0.555467	33
abnormal pulmonary valve morphology	0.000747451	0.988339	0.995197	32
abnormal Peyer's patch follicle morphology	-0.179926	0.00151114	0.0152179	26
abnormal crista ampullaris morphology	0.061477	0.244388	0.518987	30
decreased apoptosis	-0.0263127	0.206675	0.473422	197
abnormal circadian period	0.043052	0.399883	0.664027	32
absent cochlear hair cells	0.109843	0.0816468	0.269134	21
altered tumor pathology	-0.0677019	0.000679302	0.00791356	216
fused somites	-0.0695267	0.424768	0.684667	11
decreased gamma-delta T cell number	-0.0198299	0.680954	0.847941	36
decreased Purkinje cell number	0.00277783	0.938427	0.97489	65
complete perinatal lethality	0.00469961	0.798632	0.904027	254
abnormal induced retinal neovascularization	-0.0605493	0.337149	0.605915	21
small hippocampus	-0.0446796	0.382306	0.650312	32
abnormal antigen presentation via MHC class I	-0.0319235	0.679334	0.847941	14
absent Peyer's patches	-0.150685	0.0169117	0.0904331	21
disorganized secondary lens fibers	0.111218	0.165186	0.416333	13
increased energy expenditure	0.0246114	0.298063	0.570612	152
abnormal vesicle-mediated transport	0.0073793	0.871904	0.94371	40
abnormal cochlear labyrinth morphology	0.0770317	0.000203198	0.00293994	199
abnormal middle ear morphology	-0.0319812	0.339739	0.608283	75
increased hindbrain apoptosis	-0.112896	0.194955	0.458033	11
abnormal cardiovascular development	-0.0199433	0.0947452	0.299353	638
abnormal trigeminal ganglion morphology	0.0231111	0.592344	0.801326	45
asymmetric rib-sternum attachment	-0.114923	0.0323813	0.143686	29
abnormal coronary circulation	-0.0835452	0.316492	0.587256	12
abnormal embryonic tissue cell apoptosis	-0.0746328	0.00312198	0.0268453	133
increased skeletal muscle mass	0.0793719	0.197847	0.462689	22
abnormal pectoral girdle bone morphology	-0.0276863	0.168527	0.419436	212
abnormal retinal inner plexiform layer morphology	0.0952545	0.0585787	0.211798	33
abnormal neuron apoptosis	-0.0173836	0.382968	0.65076	216
abnormal vasoconstriction	0.0835792	0.0413047	0.167313	50
increased susceptibility to age related obesity	-0.0641418	0.287357	0.559538	23
increased macrophage cell number	0.0110496	0.655909	0.835365	138
abnormal pancreas development	-0.0630026	0.21095	0.478705	33
abnormal ligament morphology	-0.0335886	0.492242	0.73643	35
abnormal caudal neuropore morphology	-0.0660489	0.4483	0.703856	11
abnormal frequency of paradoxical sleep	0.0283385	0.70409	0.859904	15
decreased subcutaneous adipose tissue amount	-0.00773922	0.817295	0.914738	75
abnormal glomerular capillary morphology	-0.0349753	0.388518	0.655648	51
pancreatic islet hyperplasia	-0.0131643	0.776375	0.895174	39
abnormal type IV hypersensitivity reaction	-0.121244	0.000107578	0.0017078	86
absent anterior commissure	0.000644557	0.992663	0.996368	17
abnormal hair cell physiology	0.235555	2.64722e-07	8.89934e-06	40
increased pancreatic alpha cell number	-0.0269624	0.692272	0.853529	18
abnormal fibroblast migration	-0.0287676	0.556414	0.780584	35
decreased fibroblast cell migration	-0.0549361	0.290347	0.561534	31
abnormal respiratory epithelium morphology	0.0111507	0.595319	0.801326	194
abnormal mitochondrial physiology	0.0751638	0.00388792	0.0316291	125
enlarged third ventricle	-0.0505726	0.45788	0.712292	18
abnormal embryo size	-0.0418506	0.00177499	0.0174522	497
small spleen	-0.0884406	6.54847e-06	0.000155935	223
abnormal monocyte cell number	-0.0580991	0.019572	0.0996471	137
thin cerebellar granule layer	-0.0112762	0.892454	0.952503	12
ectopic neuron	-0.00910551	0.812471	0.912458	57
decreased bone marrow cell number	-0.0867059	0.00126489	0.0131434	117
premature death	-0.0125661	0.174866	0.42822	1141
abnormal circulating ketone body level	0.135043	0.00109871	0.0118475	49
ovary atrophy	-0.134351	0.0717621	0.244666	15
abnormal white fat cell size	0.0176083	0.646396	0.829755	57
polydipsia	-0.00214498	0.966028	0.987851	33
abnormal renal glomerular filtration	0.00681868	0.897267	0.955456	30
abnormal white fat cell morphology	0.0251963	0.451966	0.706731	75
short hair	0.0996159	0.143676	0.387545	18
dilated renal tubules	-0.0276277	0.346546	0.614276	98
absent limbs	-0.00589106	0.939194	0.975051	14
abnormal adrenocorticotropin level	-0.064657	0.168454	0.419436	38
abnormal endplate potential	0.150982	0.0430183	0.172375	15
CNS inflammation	-0.099776	0.0207979	0.104149	45
abnormal retinal inner nuclear layer thickness	0.133954	0.00547834	0.0417449	36
abnormal chemokine secretion	-0.062321	0.117315	0.342069	53
increased interferon-gamma secretion	-0.117571	1.13457e-05	0.000250593	118
abnormal pancreatic delta cell morphology	-0.105493	0.144254	0.388415	16
altered susceptibility to viral infection	-0.144591	3.80686e-09	1.91263e-07	141
abnormal midbrain morphology	-0.0272807	0.289069	0.560053	128
abnormal cochlear inner hair cell physiology	0.284707	0.00108127	0.0117752	11
abnormal otic vesicle morphology	-0.0603553	0.245372	0.519641	31
abnormal mammary gland morphology	-0.0188533	0.415126	0.675303	159
skin hemorrhage	0.0897804	0.187549	0.448001	18
abnormal urine sodium level	0.0579746	0.156963	0.404642	50
enhanced coordination	0.0787497	0.157095	0.404642	27
abnormal neuronal migration	0.0601497	0.0339787	0.147532	105
abnormal adenoma incidence	-0.0630734	0.0146186	0.082523	127
abnormal palatal shelf fusion at midline	-0.0229487	0.523367	0.760206	65
increased lymphoma incidence	-0.0561366	0.00638967	0.046667	202
abnormal interleukin-1 secretion	-0.0754443	0.0283937	0.129816	71
abnormal behavioral response to xenobiotic	0.0477206	0.00905095	0.0597991	258
increased pituitary hormone level	-0.018984	0.499388	0.741856	107
small thymus cortex	-0.109924	0.116837	0.341112	17
abnormal lung saccule morphology	0.0189889	0.693783	0.854	36
decreased glycogen level	0.048734	0.189118	0.449634	61
abnormal corpus callosum morphology	0.00765039	0.786433	0.898577	106
decreased cochlear hair cell stereocilia number	0.234268	0.000584368	0.00704943	18
abnormal primitive streak formation	-0.0327345	0.41072	0.673293	53
abnormal fetal size	-0.0449224	0.0396413	0.163132	179
skin lesions	0.0403734	0.150861	0.397039	107
increased small intestine adenocarcinoma incidence	-0.00205917	0.982016	0.992591	10
abnormal triploblastic development	-0.011519	0.5694	0.788527	209
abnormal pancreatic beta cell mass	-0.0414623	0.336749	0.605434	45
abnormal redox activity	0.0247565	0.365547	0.635227	113
decreased interleukin-5 secretion	-0.187017	0.00122175	0.0128116	25
small hair follicles	-0.0897563	0.32584	0.596467	10
abnormal CD4-positive helper T cell morphology	-0.103515	0.0004809	0.00606233	96
abnormal spinal cord grey matter morphology	0.0265936	0.220717	0.490101	181
abnormal digit morphology	0.0189647	0.30789	0.58001	249
decreased activity of thyroid	0.0717952	0.305722	0.578996	17
increased sacral vertebrae number	-0.170317	0.000867402	0.00979363	32
abnormal neuron differentiation	0.0124137	0.465338	0.718273	300
abnormal lumbar vertebrae morphology	-0.08814	0.00140667	0.0143235	111
abnormal level of surface class I molecules	-0.0240571	0.77301	0.893377	12
retinal rod cell degeneration	0.0798747	0.205458	0.472153	21
abnormal spine curvature	0.0359352	0.048098	0.186675	261
abnormal mitochondrial fission	0.155454	0.0888124	0.286556	10
altered susceptibility to autoimmune disorder	-0.103768	6.57263e-09	3.06633e-07	270
decreased urine pH	0.0545601	0.464634	0.718156	15
increased granulocyte number	-0.0242895	0.187318	0.448001	254
abnormal skeletal muscle weight	0.0905498	0.124986	0.356089	24
decreased susceptibility to endotoxin shock	-0.106819	0.00238447	0.0219794	68
abnormal kidney epithelial cell primary cilium morphology	0.0123396	0.856265	0.936867	18
abnormal Langerhans cell physiology	-0.0323476	0.634913	0.824475	18
abnormal retinal outer plexiform layer morphology	0.0704741	0.149613	0.395392	35
enlarged spleen	-0.0589173	7.95745e-05	0.00133755	394
abnormal nervous system electrophysiology	0.0704594	9.46421e-05	0.00155091	265
common atrium	0.0145382	0.826466	0.918718	19
abnormal parturition	-0.0949183	0.107793	0.325322	24
abnormal coat appearance	0.0367992	0.0104746	0.0661464	427
abnormal sperm flagellum morphology	-0.0546415	0.0639825	0.225022	97
abnormal cochlear hair cell stereociliary bundle morphology	0.14362	2.05491e-05	0.00041654	74
decreased granulocyte number	-0.0690265	0.00156988	0.0157401	179
abnormal hypodermis fat layer morphology	-0.0226734	0.430748	0.688795	102
abnormal left-right axis patterning	0.00120318	0.974992	0.991039	57
abnormal descending aorta morphology	0.0405364	0.586932	0.799006	15
disheveled coat	0.120561	0.00574206	0.0429668	44
increased fasted circulating glucose level	0.0409198	0.371262	0.640665	40
abnormal ilium morphology	-0.133455	0.144049	0.38832	10
vascular inflammation	-0.0750167	0.142414	0.385471	32
increased brain size	-0.017925	0.643405	0.828633	56
increased hemoglobin content	-0.0733423	0.113535	0.336412	39
abnormal large intestine goblet cell morphology	-0.101497	0.22363	0.493888	12
increased fibrosarcoma incidence	-0.103882	0.16384	0.414938	15
abnormal blood osmolality	0.0510259	0.494056	0.737215	15
thick lung-associated mesenchyme	-0.0636815	0.301533	0.573703	22
absent startle reflex	0.148329	0.0103243	0.0653954	25
abnormal nociception after inflammation	0.056946	0.219177	0.488809	39
lung hemorrhage	0.0135645	0.743026	0.878849	49
increased circulating triiodothyronine level	0.0304067	0.715431	0.864645	12
abnormal gastric gland morphology	0.0121065	0.807244	0.908821	34
abnormal lens epithelium morphology	0.027993	0.602239	0.806395	29
decreased cerebral infarction size	0.0353324	0.48964	0.734218	32
decreased renal glomerular filtration rate	-0.0696654	0.334923	0.603813	16
abnormal testosterone level	-0.0840842	0.0167972	0.090248	68
abnormal renal glomerulus basement membrane morphology	0.0100517	0.826157	0.918718	40
abnormal male reproductive gland physiology	-0.00805377	0.853606	0.935331	44
abnormal thymocyte activation	-0.0516277	0.381724	0.649976	24
enhanced wound healing	-0.0434224	0.481138	0.727675	22
spleen hypoplasia	-0.118702	1.10836e-05	0.00024599	116
abnormal myeloblast morphology/development	-0.0706776	0.00280517	0.024993	152
decreased mature B cell number	-0.117932	9.31083e-09	4.21476e-07	203
myeloid hyperplasia	-0.0933419	0.0413945	0.167483	40
increased aggression towards males	0.0115912	0.880692	0.947018	14
abnormal sleep behavior	-0.0176629	0.595606	0.801326	76
absent tympanic ring	0.090199	0.279487	0.551258	12
darkened coat color	0.0297963	0.661841	0.839256	18
delayed suture closure	-0.0492897	0.589504	0.800241	10
abnormal Bruch membrane morphology	-0.00691385	0.939671	0.975074	10
abnormal NMDA-mediated synaptic currents	0.0704291	0.232761	0.504592	24
abnormal outer hair cell stereociliary bundle morphology	0.153828	9.54848e-05	0.00155913	54
abnormal oocyte number	-0.185258	4.84327e-07	1.54849e-05	62
pathological neovascularization	-0.0391128	0.20134	0.467747	90
abnormal stomach glandular epithelium morphology	0.0854202	0.18633	0.446489	20
abnormal meiosis	-0.0674946	0.00384903	0.0314246	156
increased inflammatory response	-0.0217236	0.035504	0.151995	882
abnormal placenta labyrinth morphology	-0.0273229	0.244967	0.519235	154
abnormal body weight	0.0214502	0.00659953	0.0478798	1723
increased porphyrin level	-0.133989	0.108161	0.325766	12
abnormal anterior eye segment morphology	0.0438783	0.0030114	0.0261751	402
failure of heart looping	-0.0574657	0.198273	0.463307	42
abnormal susceptibility to induced colitis	-0.0608186	0.0434586	0.17338	93
heart right ventricle hypertrophy	0.0605586	0.191325	0.452763	39
abnormal oocyte morphology	-0.135479	6.12759e-06	0.000147449	94
abnormal cranium size	-0.014721	0.668888	0.841772	71
abnormal adiponectin level	-0.0151567	0.682969	0.849012	61
abnormal T-helper 2 cell number	-0.083654	0.246921	0.521868	16
abnormal heart left ventricle outflow tract morphology	0.00674697	0.875784	0.945426	45
bradykinesia	-0.0204346	0.667546	0.840777	37
altered righting response	0.0559538	0.0374865	0.157524	117
abnormal gait	0.0569276	0.000449068	0.00571905	331
abnormal retinal progenitor cell morphology	-0.183168	0.0280806	0.129188	12
decreased birth weight	-0.00786877	0.787587	0.898864	99
abnormal neurohypophysis morphology	-0.00292226	0.97205	0.989867	12
abnormal proprioceptive neuron morphology	0.0666505	0.388112	0.655617	14
abnormal neural crest cell morphology	-0.0728388	0.136421	0.375471	35
increased spleen germinal center number	-0.0774443	0.189475	0.450016	24
abnormal respiratory system morphology	-0.00413461	0.725915	0.870477	655
abnormal axillary lymph node morphology	-0.134432	0.0627897	0.222538	16
abnormal primary cilium morphology	-0.0140568	0.695875	0.855023	65
small otic vesicle	-0.0863448	0.26354	0.536156	14
abnormal touch/ nociception	0.0359023	0.0439695	0.174808	272
abnormal heart position or orientation	-0.0403566	0.355172	0.624008	44
small intestinal inflammation	0.0811567	0.107088	0.323814	33
ileum inflammation	0.123631	0.15581	0.403131	11
abnormal auchene hair morphology	0.0931751	0.211748	0.478705	15
abnormal skeletal muscle regeneration	0.00540073	0.928618	0.969796	23
polyphagia	-0.00326286	0.931666	0.970447	58
decreased total retina thickness	-0.0581721	0.393164	0.65965	18
abnormal telomere length	-0.25585	7.55217e-05	0.00128359	20
abnormal cerebellar Purkinje cell layer	0.0074049	0.719052	0.867645	202
abnormal professional antigen presenting cell physiology	-0.0684771	1.01886e-10	7.51327e-09	833
abnormal epiphyseal plate morphology	0.0272719	0.21928	0.488809	173
choroidal neovascularization	0.0691356	0.338612	0.607177	16
abnormal internal female genitalia morphology	-0.0665696	1.89412e-05	0.000391852	361
decreased dopamine level	-0.00459432	0.919052	0.964846	41
abnormal seminal vesicle weight	-0.0867133	0.100601	0.311639	30
decreased somite size	0.0320567	0.530771	0.764897	32
decreased susceptibility to viral infection induced morbidity/mortality	-0.20678	0.000603763	0.00717319	23
ectopic cerebellar granule cells	0.0420535	0.548546	0.776562	17
spina bifida occulta	0.0176601	0.801087	0.904561	17
enhanced contextual conditioning behavior	0.0492626	0.482189	0.728061	17
abnormal rostral-caudal axis patterning	-0.0541186	0.0489096	0.188317	112
abnormal circulating adrenaline level	0.0242823	0.707166	0.861947	20
abnormal vitamin or vitamin cofactor metabolism	0.0927754	0.286842	0.558988	11
abnormal embryonic neuroepithelial cell proliferation	-0.0732178	0.42285	0.682411	10
impaired muscle contractility	0.0694777	0.000144609	0.00217088	258
abnormal cell cycle	-0.126941	3.51911e-11	2.92534e-09	234
enlarged pericardium	-0.0314212	0.476647	0.726652	43
abnormal B-1b B cell morphology	-0.147803	0.0556364	0.204922	14
increased urine potassium level	0.132424	0.0519177	0.195043	18
spleen hyperplasia	-0.0806401	0.00807814	0.0554554	91
abnormal thyroid hormone level	0.0480396	0.202929	0.469832	59
abnormal motor coordination/ balance	0.0467807	6.07158e-05	0.00104358	671
abnormal behavioral response to morphine	0.0222091	0.773667	0.893661	14
impaired behavioral response to xenobiotic	0.0461982	0.157068	0.404642	79
osteoporosis	0.0403613	0.34447	0.613763	46
anterior iris synechia	0.0750308	0.27074	0.542638	18
decreased compensatory feeding amount	0.0390633	0.625936	0.817651	13
abnormal auditory brainstem response	0.0547735	0.00283899	0.0251061	256
abnormal femur morphology	0.0218694	0.374479	0.643653	140
abnormal locomotor coordination	0.0546403	2.79493e-05	0.000521569	526
retinal photoreceptor degeneration	0.0114082	0.743839	0.879223	69
abnormal sensory capabilities/reflexes/nociception	0.051734	3.63431e-06	9.49489e-05	739
abnormal interleukin-5 secretion	-0.0881222	0.0390119	0.161733	46
fragile skeleton	0.0622708	0.27221	0.542994	26
abnormal pelvic girdle bone morphology	-0.0307243	0.400206	0.664027	63
macrocytosis	-0.0756396	0.280551	0.551927	17
abnormal hair follicle melanin granule morphology	-0.0609221	0.465117	0.718273	12
alpha-beta T cell differentiation	-0.0959167	0.148058	0.393103	19
decreased susceptibility to bacterial infection	-0.0510152	0.0806582	0.266629	99
increased B cell proliferation	-0.075987	0.0345949	0.149356	65
abnormal leukocyte cell number	-0.0574615	8.66135e-11	6.49176e-09	1274
abnormal pancreas morphology	-0.0347279	0.0556679	0.204922	262
hydroencephaly	-0.017285	0.506733	0.745665	125
absent spleen germinal center	-0.250779	9.78623e-06	0.000220407	26
abnormal systemic arterial blood pressure	0.0641758	0.00131089	0.0135597	215
aorta dilation	-0.00316669	0.969713	0.988638	12
myositis	0.0743641	0.198498	0.463307	25
abnormal blood coagulation	0.0250884	0.197105	0.461453	227
abnormal vitreous body morphology	-0.0157751	0.66579	0.839721	63
shortened RR interval	0.0199604	0.818753	0.915429	11
abnormal circulating enzyme level	0.0172798	0.249464	0.525598	390
abnormal zona pellucida morphology	-0.013378	0.877939	0.94582	11
abnormal intervertebral disk morphology	0.0393635	0.408018	0.670787	37
abnormal lung alveolus development	-0.0578638	0.200556	0.466638	41
abnormal urine urea nitrogen level	0.119316	0.136514	0.375471	13
disorganized embryonic tissue	0.00667445	0.901104	0.956991	29
increased gonadal fat pad weight	-0.0599787	0.256075	0.529211	30
abnormal urine glucose level	-0.068938	0.252833	0.527622	23
patent ductus arteriosus	0.0464253	0.547738	0.776514	14
abnormal hindlimb zeugopod morphology	-0.0158594	0.471278	0.722407	176
abnormal kidney mesenchyme morphology	0.0672378	0.210623	0.478705	29
decreased hematocrit	0.0123206	0.581064	0.797786	171
small adenohypophysis	-0.0165126	0.803353	0.905778	19
abnormal vascular smooth muscle morphology	-0.0225104	0.464581	0.718156	89
abnormal behavioral response to cocaine	-0.0105985	0.843573	0.929113	29
abnormal tumor necrosis factor secretion	-0.0839893	5.56147e-05	0.000963146	197
abnormal behavioral response to anesthetic	0.0980899	0.260129	0.533323	11
abnormal pulmonary alveolar system morphology	0.0187718	0.334499	0.603777	227
abnormal systemic artery morphology	0.00922052	0.647296	0.830128	211
abnormal reproductive system development	-0.0802213	0.0146202	0.082523	78
abnormal circulating interferon-beta level	-0.12557	0.169266	0.42003	10
absent trabeculae carneae	0.00538562	0.946418	0.977859	13
ocular hypertelorism	0.112906	0.0557525	0.205069	24
abnormal extraembryonic ectoderm morphology	-0.144726	0.0389533	0.161733	17
abnormal incidence of induced tumors	-0.0469645	0.0209548	0.104341	207
increased immunoglobulin level	-0.101165	2.33996e-08	9.81496e-07	263
increased hepatocellular carcinoma incidence	-0.0133637	0.703926	0.859904	68
cyanosis	0.0100578	0.622636	0.815743	205
abnormal IgG2b level	-0.189493	4.54957e-11	3.7144e-09	102
abnormal secondary palate development	-0.00989856	0.734647	0.875499	99
prostate gland hyperplasia	-0.0496937	0.586457	0.799006	10
small parietal bone	-0.0310285	0.648779	0.830205	18
abnormal circulating protein level	-0.02259	0.0426464	0.171185	743
abnormal cerebellum development	0.0142271	0.587709	0.799006	123
abnormal vagus nerve morphology	0.00982544	0.873349	0.944354	22
pulmonary vascular congestion	0.0315439	0.52497	0.760793	34
increased mast cell degranulation	-0.0156262	0.864181	0.941171	10
abnormal platelet volume	-0.0572187	0.162442	0.412776	50
abnormal retinal bipolar cell morphology	0.092971	0.0476729	0.185656	38
gastrointestinal ulcer	-0.000593993	0.99031	0.995536	35
increased myeloid cell number	-0.0405378	0.0442745	0.175867	211
abnormal renal tubule epithelial cell primary cilium morphology	-0.024471	0.760089	0.888552	13
progressive muscle weakness	0.0392938	0.480189	0.727675	27
amyloidosis	0.00952535	0.803996	0.906057	57
abnormal direction of embryo turning	-0.0859397	0.265787	0.538403	14
pituitary gland hypoplasia	0.0545549	0.55038	0.777367	10
abnormal female reproductive system morphology	-0.0663938	1.58942e-05	0.000334876	370
abnormal CNS synapse formation	0.074652	0.225844	0.495707	22
abnormal thoracic aorta morphology	0.0131408	0.638568	0.825043	108
decreased nerve conduction velocity	0.0445435	0.376458	0.644821	33
abnormal hippocampus pyramidal cell layer	0.0583502	0.0900396	0.288682	71
abnormal diaphragm development	0.0136387	0.87558	0.945426	11
abnormal thymocyte apoptosis	-0.0553204	0.164463	0.415699	53
increased circulating cholesterol level	-0.019941	0.340979	0.60992	195
abnormal cutaneous collagen fibril morphology	0.153037	0.01527	0.0851323	21
abnormal potassium ion homeostasis	0.0438742	0.171053	0.422292	82
decreased skeletal muscle fiber diameter	0.0781785	0.138783	0.379573	30
decreased food intake	0.0451078	0.167093	0.418081	79
abnormal CNS synaptic transmission	0.0659191	8.13027e-07	2.39817e-05	499
decreased small intestinal villus size	0.057826	0.409399	0.671634	17
abnormal pituitary intermediate lobe morphology	-0.062974	0.46971	0.721904	11
abnormal eyelid development	0.084312	0.137113	0.37613	26
decreased grooming behavior	0.0402605	0.523343	0.760206	21
abnormal anal canal morphology	-0.0382882	0.499602	0.741856	26
exencephaly	-0.0392678	0.0529962	0.19828	208
abnormal synaptic depression	0.0643223	0.0254024	0.119487	102
increased stomach tumor incidence	-0.0928641	0.131912	0.36842	22
abnormal rostral neuropore morphology	-0.0324626	0.345628	0.614151	71
ectopic bone formation	-0.0930992	0.308146	0.58001	10
abnormal circulating alanine transaminase level	-0.0152621	0.533968	0.766981	141
decreased trabecular bone connectivity density	0.145837	0.0940846	0.298511	11
abnormal platelet dense granule morphology	0.0135884	0.821673	0.91588	23
increased left ventricle weight	0.126023	0.0262763	0.122712	26
abnormal inner ear vestibule morphology	0.068738	0.0429046	0.17207	73
decreased pancreatic beta cell mass	-0.0426075	0.412176	0.674117	31
alpha-beta T cells	0.0671958	0.323961	0.594646	18
abnormal creatine kinase level	0.121051	0.0267804	0.124178	28
abnormal circulating androgen level	-0.0861549	0.0183252	0.0956712	63
abnormal somatic motor system morphology	0.115909	0.00038498	0.0049862	79
abnormal circulating interleukin-4 level	-0.238303	1.85534e-05	0.000385574	27
abnormal blood cell morphology/development	-0.0783698	1.05507e-14	3.44557e-12	922
abnormal heart shape	-0.00447837	0.940784	0.975353	23
kinked tail	-0.0145773	0.607349	0.808689	105
abnormal CD4-positive, alpha-beta memory T cell number	-0.173982	0.0071103	0.0504787	20
abnormal exercise endurance	0.0811757	0.0433042	0.172914	52
abnormal germ cell morphology	-0.069438	1.83986e-07	6.47064e-06	503
abnormal type I hypersensitivity reaction	0.0178865	0.611003	0.810652	68
abnormal leukopoiesis	-0.0974744	1.42612e-15	8.15027e-13	607
abnormal long bone morphology	0.00510408	0.7185	0.867255	441
abnormal Peyer's patch size	-0.21154	3.79641e-06	9.86205e-05	40
unresponsive to tactile stimuli	0.121631	0.0484595	0.187601	22
abnormal response to transplant	-0.132352	0.000563994	0.00689461	57
small adrenal glands	-0.119359	0.0985232	0.306845	16
abnormal embryonic neuroepithelial layer differentiation	0.0463122	0.508808	0.747516	17
abnormal nail morphology	0.004792	0.932663	0.970666	26
abnormal mammary gland alveolus morphology	0.0157433	0.765623	0.890468	30
increased sensory neuron number	0.0341588	0.413819	0.674721	48
abnormal telencephalon development	0.0136486	0.605899	0.808331	121
increased circulating parathyroid hormone level	0.0533333	0.446741	0.702373	17
increased alpha-beta T cell number	-0.0690965	0.00105769	0.0115688	192
heart left ventricle hypertrophy	0.100201	0.00791335	0.0544877	59
reduced male fertility	-0.0245097	0.207637	0.474603	227
abnormal retinal pigment epithelium morphology	-0.0190536	0.462497	0.716793	126
abnormal seminiferous tubule epithelium morphology	-0.0623198	0.0578552	0.210433	78
abnormal vascular endothelial cell physiology	0.0197316	0.640405	0.826166	47
arteritis	-0.0666831	0.38788	0.655617	14
abnormal hepatocyte morphology	-0.0110681	0.647471	0.830128	145
enlarged thyroid gland	0.048397	0.596263	0.801326	10
abnormal embryo implantation	-0.0263068	0.504606	0.744693	54
abnormal respiratory function	0.00239861	0.880613	0.947018	342
abnormal heart ventricle wall thickness	-0.0166961	0.490319	0.734902	145
abnormal granulosa cell morphology	0.048073	0.425219	0.685024	23
abnormal pinna reflex	0.112739	0.00591673	0.0440945	50
circling	0.0625286	0.0297881	0.134843	102
abnormal heart development	-0.0202769	0.222883	0.493473	314
decreased fertilization frequency	-0.064322	0.404904	0.668256	14
decreased susceptibility to ischemic brain injury	0.0517423	0.252392	0.527622	41
abnormal scapula morphology	0.083025	0.0493488	0.188484	47
abnormal neuron specification	0.125268	0.104788	0.320035	14
abnormal cartilage development	0.0122063	0.593305	0.801326	163
abnormal holocrine gland morphology	0.0256504	0.412595	0.674117	86
photosensitivity	0.000306269	0.997325	0.998636	10
abnormal endolymphatic duct morphology	-0.0245824	0.652889	0.832871	28
abnormal Z lines	0.0912895	0.094879	0.299353	28
abnormal pancreatic duct morphology	-0.0895195	0.188835	0.449195	18
abnormal prostaglandin level	0.11577	0.0375204	0.157524	27
conjunctivitis	0.00649481	0.908826	0.960382	26
abnormal endometrial gland morphology	-0.0887725	0.124788	0.355915	25
increased vascular permeability	0.0104607	0.821427	0.91588	39
abnormal lymph node secondary follicle morphology	-0.233227	1.41002e-05	0.000302658	29
absent corpus callosum	0.0686174	0.160635	0.409834	35
heart left ventricle outflow tract stenosis	-0.0877559	0.255816	0.529211	14
abnormal basicranium morphology	0.0576948	0.0871076	0.282469	74
decreased total body fat amount	0.0151974	0.397207	0.661592	268
abnormal glucose homeostasis	0.0207244	0.0472694	0.184242	860
pale liver	0.0258096	0.444066	0.701302	74
embryonic lethality between somite formation and embryo turning	-0.0430007	0.149084	0.394844	95
decreased total tissue mass	0.0164569	0.0497225	0.188875	1464
absent germ cells	-0.077786	0.000665752	0.00780466	163
increased serotonin level	0.0417862	0.602065	0.806395	13
abnormal CD4-positive, alpha beta T cell morphology	-0.0775234	2.56951e-06	6.91046e-05	320
limb grasping	0.0589216	0.00777779	0.0538418	174
abnormal heart ventricle pressure	-0.0164676	0.670616	0.842555	56
globozoospermia	-0.0498274	0.361966	0.631235	28
decreased heart rate variability	0.0790392	0.323986	0.594646	13
abnormal ulna morphology	0.0286401	0.383371	0.650817	78
absent inner cell mass	-0.118023	0.0922337	0.294067	17
abnormal stomach position or orientation	-0.161071	0.0151426	0.0847394	19
decreased liver glycogen level	0.00701669	0.911436	0.960382	21
impaired muscle relaxation	0.191694	0.00489555	0.038087	18
abnormal bronchiole morphology	0.0178875	0.703202	0.859636	38
abnormal blastocyst hatching	-0.165573	0.000847512	0.00963887	34
renal hypoplasia	-0.0135556	0.74069	0.877807	50
abnormal heart septum morphology	-0.0198438	0.24168	0.516966	302
abnormal bile composition	0.162655	0.0203164	0.102583	17
abnormal angiogenesis	-0.0090481	0.588224	0.799006	311
abnormal enterocyte proliferation	0.0155353	0.750763	0.883436	35
small liver	-0.0328306	0.139185	0.379687	173
abnormal pons morphology	0.00604088	0.882754	0.94821	50
decreased muscle spindle number	-0.00752441	0.931163	0.970447	11
small testis	-0.0674617	1.09975e-05	0.000245271	372
abnormal vestibular hair cell stereociliary bundle morphology	0.0373598	0.605087	0.807489	16
muscle weakness	0.0882974	0.0103113	0.0653954	71
decreased transitional stage B cell number	-0.122644	0.0066692	0.0481699	41
abnormal renal filtration	0.0530434	0.19533	0.458443	50
abnormal vascular endothelial cell development	0.0161767	0.759368	0.888391	30
abnormal lymph node morphology	-0.084413	8.10927e-07	2.39817e-05	296
abnormal bone healing	-0.0541574	0.553288	0.779068	10
small Peyer's patches	-0.213365	5.34183e-05	0.00093217	30
abnormal basisphenoid bone morphology	0.0289447	0.521999	0.759628	41
decreased pituitary hormone level	-0.0414946	0.159536	0.407367	97
altered susceptibility to parasitic infection	-0.151306	1.61048e-08	6.88141e-07	118
abnormal circulating magnesium level	0.0104763	0.847999	0.931695	28
absent vibrissae	0.0563427	0.270586	0.542638	32
abnormal posterior semicircular canal morphology	-0.0816409	0.230766	0.501456	18
abnormal osteoblast differentiation	-0.0232327	0.56303	0.784809	52
abnormal glans penis morphology	-0.0925535	0.214812	0.482123	15
abnormal myocardial fiber physiology	0.0339145	0.18583	0.445992	129
increased mean corpuscular hemoglobin concentration	-0.0276495	0.632584	0.823043	25
abnormal heart ventricle outflow tract morphology	-0.023219	0.524938	0.760793	63
increased single-positive T cell number	-0.041877	0.354272	0.623452	41
abnormal somatic hypermutation frequency	-0.0252608	0.734944	0.875499	15
abnormal dorsal-ventral axis patterning	-0.130078	0.049811	0.188875	19
abnormal T-helper 2 physiology	-0.131757	0.000429357	0.00549865	60
abnormal kidney epithelium morphology	-0.043341	0.271626	0.542638	54
abnormal smooth muscle morphology	-0.0132991	0.606669	0.808656	127
abnormal liver glycogen level	-0.0539898	0.201188	0.467631	47
abnormal exoccipital bone morphology	0.00873963	0.916545	0.96374	12
abnormal vascular development	-0.0177704	0.211432	0.478705	437
abnormal vagina morphology	-0.0366699	0.347922	0.615357	55
obese	-0.0415233	0.189853	0.45068	84
decreased aggression towards males	0.142839	0.0643725	0.225699	14
decreased systemic arterial diastolic blood pressure	0.0886999	0.287556	0.559688	12
increased nucleated erythrocyte cell number	-0.0163385	0.72109	0.867898	40
abnormal thymus lobule morphology	-0.0501754	0.106982	0.323708	87
abnormal alveolar macrophage morphology	-0.0760328	0.405239	0.668256	10
small ears	-0.0124452	0.819885	0.915429	28
abnormal pterygoid bone morphology	0.0548114	0.511065	0.749672	12
abnormal mesenchyme morphology	0.0644059	0.404292	0.668024	14
abnormal immunoglobulin V(D)J recombination	0.0491321	0.48335	0.729223	17
abnormal dorsal root ganglion morphology	-0.0261962	0.351301	0.619179	107
hypotension	0.0687177	0.234751	0.506859	25
decreased double-negative T cell number	-0.0731274	0.0487811	0.188317	61
abnormal tail bud morphology	-0.00881976	0.886219	0.949565	22
decreased alpha-beta T cell number	-0.0796825	6.7218e-06	0.000159234	276
abnormal brain commissure morphology	0.0134981	0.594346	0.801326	132
total cataracts	0.229915	0.00830381	0.0565797	11
sporadic seizures	-0.00541299	0.919725	0.96506	29
abnormal kidney collecting duct epithelium morphology	-0.036635	0.688399	0.851635	10
abnormal hyoid bone lesser horn morphology	-0.115775	0.183809	0.442537	11
psoriasis	-0.0232664	0.789391	0.900248	11
increased blood osmolality	0.0286031	0.711102	0.863046	14
abnormal transforming growth factor beta level	-0.00420415	0.959798	0.98535	12
abnormal pro-B cell morphology	-0.128245	7.73258e-05	0.00130938	80
decreased circulating interleukin-4 level	-0.208837	0.00684702	0.0491438	14
decreased sensitivity to induced cell death	-0.022795	0.493385	0.737215	76
abnormal skin morphology	0.0043056	0.699222	0.856411	743
short sperm flagellum	-0.154849	0.0754552	0.253849	11
increased circulating insulin-like growth factor I level	-0.0922781	0.312432	0.584658	10
mandible hypoplasia	-0.022114	0.696593	0.855215	26
decreased type II pneumocyte number	0.12892	0.158176	0.405801	10
abnormal pulmonary alveolus epithelial cell morphology	0.0105423	0.764336	0.890009	68
abnormal secondary ovarian follicle morphology	-0.0602586	0.307274	0.58001	24
abnormal circulating interleukin-1 beta level	-0.0810007	0.0551564	0.203696	47
increased basal metabolism	-0.0961082	0.127638	0.361337	21
decreased interferon-alpha secretion	-0.121717	0.0391849	0.161983	24
decreased CD4-positive	-0.0648406	0.00172025	0.0170607	200
increased erythrocyte cell number	-0.0426665	0.246454	0.521419	62
delayed hepatic development	0.0460292	0.597206	0.802246	11
abnormal pancreatic alpha cell physiology	-0.025038	0.720946	0.867898	17
decreased pancreas weight	-0.164056	0.0725177	0.247057	10
abnormal eye electrophysiology	0.0617253	0.00447724	0.0355999	181
abnormal behavior	0.0497232	1.71116e-12	2.05879e-10	2477
abnormal podocyte morphology	-0.02371	0.500156	0.741957	68
cardiac interstitial fibrosis	0.0436436	0.281916	0.554136	51
decreased circulating phosphate level	0.0409585	0.478808	0.727038	25
short sternum	0.00339145	0.945509	0.977549	34
abnormal platelet dense granule physiology	0.144409	0.113926	0.336698	10
abnormal myeloid leukocyte morphology	-0.0403926	0.000342621	0.0045803	723
abnormal amniotic cavity morphology	-0.0298644	0.688969	0.852005	15
absent outer ear	0.0490021	0.540883	0.771822	13
decreased cholesterol level	0.00677368	0.727097	0.870598	228
increased CD4-positive, alpha beta T cell number	-0.123246	0.0159559	0.0872615	32
salivary gland inflammation	-0.0987727	0.075953	0.25506	27
abnormal megakaryocyte progenitor cell morphology	-0.0600152	0.0388967	0.161669	100
hairless	0.0118909	0.891418	0.952477	11
dystonia	0.0671995	0.298513	0.570612	20
impaired avoidance learning behavior	0.108939	0.0503091	0.190408	27
decreased fear-related response	0.0256292	0.595136	0.801326	36
increased susceptibility to ischemic brain injury	0.00339529	0.945447	0.977549	34
lung inflammation	-0.0915982	4.75675e-05	0.000838872	168
premature bone ossification	0.0470416	0.425438	0.685136	24
abnormal alveolar process morphology	-0.0371937	0.574878	0.792719	19
normal phenotype	-0.0297134	0.000212973	0.00307164	1648
tremors	0.0184032	0.331047	0.601329	240
abnormal kidney physiology	0.00535638	0.734873	0.875499	349
abnormal cricoid cartilage morphology	0.0661642	0.35978	0.629397	16
abnormal cardiomyocyte apoptosis	0.0275975	0.468285	0.721118	58
abnormal splenocyte apoptosis	-0.0466116	0.493849	0.737215	18
abnormal cell physiology	-0.0359837	2.29296e-07	7.82344e-06	2609
absent forebrain	-0.0525925	0.511643	0.749672	13
spontaneous chromosome breakage	-0.0378114	0.513238	0.751368	25
increased synaptic depression	0.106594	0.18347	0.441952	13
absent teeth	0.00369763	0.961812	0.98535	14
abnormal circulating interleukin-12 level	-0.15162	0.00409197	0.0328219	30
renal interstitial fibrosis	-0.0440324	0.313061	0.585165	44
abnormal meninges morphology	-0.00715924	0.914026	0.96244	19
increased follicular B cell number	-0.138906	0.0242229	0.115241	22
abnormal leukocyte morphology	-0.0612567	2.74706e-13	4.83061e-11	1465
abnormal lens development	0.0224551	0.548415	0.776562	60
abnormal skin adnexa physiology	0.00831511	0.71519	0.864582	164
decreased circulating serum albumin level	-0.0130166	0.713285	0.863668	67
increased fear-related response	-0.0222976	0.77279	0.893349	14
abnormal lipid homeostasis	0.0249852	0.0156981	0.0860573	880
absent amnion	-0.0351005	0.587109	0.799006	20
abnormal tail pigmentation	-0.0599725	0.272538	0.543175	28
retroesophageal right subclavian artery	-0.0440542	0.506474	0.745665	19
abnormal testis weight	-0.0650503	0.000962778	0.0107362	221
abnormal interleukin level	-0.109422	7.49793e-09	3.45812e-07	240
abnormal ureter morphology	-0.0256074	0.303517	0.57628	137
abnormal total fat pad weight	0.0667281	0.185194	0.445636	33
abnormal CD8-positive, alpha beta T cell morphology	-0.0754486	1.49518e-05	0.000316479	285
decreased digestive secretion	0.0686491	0.391641	0.658141	13
abnormal epidermis suprabasal layer morphology	0.0213722	0.740914	0.877807	20
abnormal epididymis weight	-0.0896586	0.107199	0.323935	27
abnormal paired-pulse facilitation	0.101284	0.0125201	0.0752191	51
decreased skeletal muscle mass	0.0511653	0.0768276	0.257142	101
decreased heart right ventricle size	0.0354123	0.613421	0.811591	17
abnormal long bone diaphysis morphology	-0.0270823	0.660389	0.838587	22
abnormal NK cell number	-0.080031	0.00330518	0.0279321	114
abnormal cerebellar lobule formation	-0.0029102	0.96787	0.988638	16
abnormal T-helper 2 cell differentiation	-0.121702	0.0597253	0.214585	20
abnormal lung lobe morphology	-0.00469216	0.930385	0.970447	29
abnormal circulating amylase level	0.0292713	0.453707	0.707969	55
myoclonus	0.0970861	0.0660094	0.229634	30
abnormal cervical lymph node morphology	-0.164491	0.013119	0.0778961	19
increased keratinocyte apoptosis	0.0384456	0.658952	0.837963	11
apnea	0.0803657	0.202685	0.469685	21
abnormal joint mobility	0.116489	0.16251	0.412776	12
abnormal amino acid level	0.0637246	0.000821823	0.00937001	237
cochlear hair cell degeneration	0.0817226	0.0128701	0.0770018	78
abnormal coronary artery morphology	0.0592529	0.2541	0.528307	31
interrupted aorta	0.0159048	0.738149	0.877509	37
enlarged placenta	-0.167067	0.0207561	0.104149	16
decreased fibroblast apoptosis	0.0849358	0.225626	0.495466	17
abnormal pancreatic acinar cell zymogen granule morphology	0.0432506	0.537223	0.768999	17
abnormal Peyer's patch germinal center morphology	-0.185295	0.0103271	0.0653954	16
abnormal ear pigmentation	-0.0981176	0.129026	0.363567	20
abnormal rib-sternum attachment	-0.0948682	0.0134456	0.0794228	57
abnormal kidney calyx morphology	-0.143327	0.11666	0.341112	10
increased sensitivity to induced cell death	-0.0469505	0.0457313	0.18015	154
small pancreatic islets	-0.00366006	0.932423	0.970637	45
increased cardiomyocyte apoptosis	0.0163782	0.698206	0.856411	47
abnormal miniature inhibitory postsynaptic currents	0.150594	0.00681521	0.0489924	27
decreased osteoblast cell number	-0.0101837	0.830505	0.921395	37
increased tumor growth/size	0.0021321	0.956477	0.983584	55
abnormal vascular endothelial cell morphology	-0.0293	0.415196	0.675303	65
absent hair follicles	-0.0709327	0.395062	0.660412	12
increased circulating pituitary hormone level	-0.0253289	0.402884	0.666217	92
abnormal B cell physiology	-0.0926516	4.10187e-13	6.58031e-11	550
abnormal spermatid morphology	-0.0327333	0.23986	0.514854	109
increased integument system tumor incidence	-0.0226054	0.362007	0.631235	138
increased circulating tumor necrosis factor level	-0.104896	0.00162216	0.0161933	76
abnormal spinal cord dorsal column morphology	0.148822	0.0632988	0.223304	13
abnormal cellular respiration	0.064343	0.0214562	0.105829	108
abnormal biliary tract morphology	-0.0116475	0.74979	0.883436	63
abnormal blood homeostasis	0.0111257	0.124782	0.355915	2239
abnormal marginal zone B cell morphology	-0.136853	3.49728e-06	9.1894e-05	97
abnormal urine potassium level	0.0551741	0.259286	0.532789	35
thick aortic valve	-0.0130348	0.856827	0.93718	16
abnormal male genitalia morphology	-0.0475077	0.00013202	0.00201872	584
abnormal hypersensitivity reaction	-0.0638606	0.00608387	0.0448636	157
increased hemangioma incidence	-0.0239859	0.684454	0.849217	24
abnormal parietal yolk sac morphology	-0.0455666	0.0824878	0.270735	123
abnormal membranous labyrinth morphology	0.0605816	0.00192689	0.0184642	225
abnormal dendritic cell chemotaxis	-0.089639	0.326473	0.596467	10
abnormal Purkinje cell morphology	0.0184225	0.394976	0.660412	182
abnormal mesonephros morphology	-0.0162779	0.765845	0.890499	28
abnormal eyelid morphology	0.00759449	0.709542	0.862754	206
abnormal spleen white pulp morphology	-0.107144	8.93448e-10	5.10606e-08	283
decreased thyroid-stimulating hormone level	-0.0779762	0.280465	0.551927	16
intestinal obstruction	0.0106177	0.883163	0.94829	16
enlarged pancreatic islets	0.000970954	0.980352	0.992591	54
abnormal vestibulocochlear ganglion morphology	0.0477604	0.483264	0.729223	18
thrombocytosis	-0.0876439	0.0140595	0.0809621	66
decreased alcohol consumption	-0.0597683	0.455773	0.709787	13
abnormal mural trophectoderm morphology	-0.0529174	0.116604	0.341112	74
abnormal craniofacial morphology	-0.00868542	0.399855	0.664027	885
vertebral transformation	-0.0250601	0.402907	0.666217	94
heterotaxia	-0.0937824	0.0145475	0.082523	57
increased adrenal gland tumor incidence	-0.0376592	0.638402	0.825043	13
abnormal skin adnexa morphology	0.0141398	0.206682	0.473422	735
increased cranium width	0.170852	0.0614486	0.219108	10
dilated heart left ventricle	0.0436551	0.156109	0.403237	89
cochlear inner hair cell degeneration	0.0952386	0.025698	0.120314	46
lethality during fetal growth through weaning	0.0023241	0.762961	0.890009	1848
abnormal bile secretion	0.145166	0.0700681	0.240504	13
abnormal hepatocyte physiology	-0.0438275	0.101756	0.312654	118
delayed bone ossification	-0.016972	0.542256	0.772494	109
abnormal ovarian follicle number	-0.123254	8.76606e-06	0.000199395	110
abnormal B cell proliferation	-0.0942384	9.88203e-05	0.00160215	145
abnormal spatial learning	0.0382207	0.0614695	0.219108	205
abnormal coat/ hair morphology	0.0354715	0.0122418	0.0740335	441
abnormal tongue muscle morphology	-0.0113306	0.891939	0.952503	12
abnormal lacrimal gland morphology	-0.0809898	0.161391	0.411116	25
abnormal forebrain size	-0.0367164	0.360714	0.630421	52
abnormal response to tactile stimuli	0.0427707	0.147088	0.391437	97
small frontal bone	-0.0368769	0.645392	0.82953	13
decreased skeletal muscle weight	0.0791368	0.245386	0.519641	18
kidney medulla cysts	-0.0852644	0.269561	0.541967	14
abnormal motor capabilities/coordination/movement	0.0550168	2.26824e-12	2.52936e-10	1758
irregular coat pigmentation	-0.00418353	0.943492	0.976601	24
decreased respiratory quotient	-0.0365186	0.402776	0.666217	44
abnormal uterine environment	0.0157744	0.747058	0.880977	35
decreased circulating insulin-like growth factor I level	-0.0773192	0.0616531	0.219531	49
cachexia	-0.0162273	0.526711	0.761659	129
abnormal heart left ventricle pressure	-0.0320246	0.4787	0.727038	41
impaired granulosa cell differentiation	-0.0672011	0.420398	0.679173	12
abnormal female germ cell morphology	-0.133315	4.48148e-06	0.000114921	100
microphthalmia	0.0208055	0.394873	0.660412	142
abnormal skin coloration	-0.027116	0.400421	0.664027	81
abnormal adrenal cortex morphology	-0.0426445	0.357501	0.626724	39
abnormal skeletal muscle mass	0.0602608	0.0244507	0.116204	118
lysosomal protein accumulation	0.162224	0.0517708	0.194651	12
heart hypoplasia	-0.0675618	0.273033	0.543924	22
abnormal T-helper 1 physiology	-0.0670191	0.0952455	0.299689	52
abnormal small intestinal microvillus morphology	0.00496493	0.954547	0.982704	11
enlarged lung	-0.0532792	0.22221	0.492698	44
decreased triglyceride level	0.0321155	0.104669	0.319883	219
abnormal bone marrow morphology	-0.00307299	0.940793	0.975353	49
abnormal ureteric bud invasion	-0.0277343	0.739489	0.877711	12
abnormal female reproductive gland morphology	-0.0851442	9.47672e-07	2.74225e-05	287
abnormal gametes	-0.0794231	1.53652e-07	5.53146e-06	383
abnormal glial cell morphology	0.00412341	0.800481	0.904268	327
abnormal atrioventricular cushion morphology	-0.0510238	0.12524	0.356536	76
abnormal susceptibility to weight gain	0.0135463	0.498536	0.74137	214
pulmonary alveolar hemorrhage	-0.011398	0.878587	0.94582	15
abnormal placenta size	-0.0986625	0.0034369	0.0287793	74
decreased b wave amplitude	-0.0413911	0.591982	0.801245	14
abnormal palatine bone morphology	-0.0414956	0.358672	0.628535	41
decreased mature ovarian follicle number	-0.118009	0.00230545	0.0215113	56
abnormal trabecula carnea morphology	-0.0323339	0.322002	0.593626	79
abnormal offspring retrieval	0.102501	0.15598	0.403131	16
impaired behavioral response to cocaine	-0.0317652	0.680837	0.847941	14
postnatal lethality	-0.00294659	0.756109	0.88662	1077
short tibia	-0.0332811	0.223827	0.493888	113
renal glomerulus fibrosis	-0.225136	0.00355401	0.0295558	14
abnormal body wall morphology	-0.0175982	0.567502	0.787202	89
abnormal cell cycle checkpoint function	-0.146563	0.000302116	0.00413556	51
poikilocytosis	0.00350232	0.942914	0.976601	35
abnormal vein development	-0.0419113	0.405309	0.668256	33
abnormal midbrain-hindbrain boundary morphology	-0.0483265	0.490552	0.734902	17
abnormal lymph organ size	-0.0693776	1.99358e-10	1.40226e-08	780
abnormal glomerular capillary endothelium morphology	-0.0656628	0.335122	0.603933	18
abnormal vestibular saccule morphology	0.0887129	0.0338117	0.147226	48
increased susceptibility to induction of seizure by inducing agent	0.0292771	0.323445	0.594646	96
abnormal survival	-0.00758917	0.250336	0.526408	3585
increased sensitivity to xenobiotic induced morbidity/mortality	-0.0124675	0.633361	0.823659	124
abnormal somatosensory cortex morphology	0.0579961	0.297399	0.569981	27
decreased male germ cell number	-0.0840557	2.02829e-07	7.02525e-06	333
hypoalgesia	0.0669488	0.00756967	0.0528374	135
genetic imprinting	-0.242577	1.15557e-07	4.36633e-06	40
abnormal malleus morphology	0.0169418	0.752437	0.884583	29
glomerulonephritis	-0.0708884	0.0192282	0.0985552	92
abnormal aorta morphology	0.0302442	0.165992	0.416986	179
increased kidney iron level	0.0394761	0.665648	0.839721	10
atrioventricular block	0.0544635	0.197263	0.461559	47
small alisphenoid bone	0.148811	0.0875662	0.282935	11
lymphedema	0.101503	0.243912	0.518682	11
abnormal facial morphology	0.00471577	0.706581	0.861463	574
abnormal paraxial mesoderm morphology	-0.0538908	0.27053	0.542638	35
abnormal fatty acid oxidation	0.129939	0.0444038	0.176075	20
abnormal occipital lobe morphology	0.0442222	0.61168	0.810686	11
abnormal bone marrow hematopoietic cell morphology	-0.0526393	0.0805142	0.266361	93
abnormal kidney apoptosis	0.0516348	0.174787	0.42822	58
decreased trabecular bone thickness	0.0369832	0.419035	0.678156	40
abnormal lysosome morphology	0.0467484	0.36066	0.630421	32
abnormal tidal volume	-0.0836019	0.27901	0.550807	14
abnormal epidermis stratum basale morphology	0.0243645	0.501364	0.742785	64
abnormal endocrine pancreas physiology	-0.00407625	0.85972	0.93967	160
abnormal kidney pelvis morphology	-0.0327798	0.245672	0.520005	106
abnormal sperm mitochondrial sheath morphology	-0.0625961	0.345195	0.614151	19
abnormal nephron number	-0.0384799	0.541878	0.772278	21
abnormal DNA replication	-0.101051	0.117976	0.343339	20
abnormal interferon secretion	-0.123798	1.57453e-12	1.99965e-10	282
abnormal nasal septum morphology	0.0655416	0.157307	0.404732	39
abnormal brain development	-0.0104394	0.388673	0.655648	618
increased carbon dioxide production	0.0413718	0.327357	0.596523	47
abnormal IgM level	-0.111501	1.26108e-07	4.68751e-06	192
impaired luteinization	-0.0290075	0.739126	0.877509	11
abnormal intestinal peristalsis	-0.0272557	0.665704	0.839721	21
narrow eye opening	-0.0170395	0.720227	0.867684	37
herniated diaphragm	-0.0238448	0.668343	0.841317	27
abnormal sex gland physiology	-0.0476734	0.172083	0.423349	69
irregular heartbeat	0.0611827	0.110917	0.331379	57
partial embryonic lethality	-0.0650182	0.105546	0.321382	52
abnormal oxidative phosphorylation	0.0510824	0.333413	0.603122	30
decreased acute inflammation	-0.0977716	8.94629e-06	0.000202487	176
abnormal atrioventricular valve morphology	-0.0696168	0.0493884	0.188484	67
abnormal hair cell morphology	0.0919803	3.79333e-05	0.000685499	171
enlarged adrenal glands	-0.102782	0.0954149	0.299819	22
decreased surfactant secretion	-0.121551	0.145013	0.38918	12
abnormal cardinal vein morphology	-0.0371023	0.497257	0.7403	28
abnormal emotion/affect behavior	0.0543196	6.67541e-05	0.00113881	479
axon degeneration	0.0521276	0.11969	0.346967	75
partial prenatal lethality	-0.017399	0.286952	0.558988	326
abnormal patella morphology	0.0307893	0.651306	0.832245	18
abnormal abdominal wall morphology	-0.0139176	0.679823	0.847941	74
abnormal compensatory feeding amount	0.0293325	0.666785	0.840282	18
increased circulating ketone body level	0.136902	0.00579829	0.0433166	34
abnormal penis morphology	-0.107851	0.0622004	0.220964	25
abnormal olfactory tract morphology	0.0367001	0.687874	0.8516	10
abnormal aorta elastic fiber morphology	0.0138063	0.853199	0.935331	15
abnormal carbon dioxide production	0.00536898	0.882217	0.948166	64
perinatal lethality	-0.00280162	0.768458	0.891622	1069
abnormal T-helper 1 cell differentiation	-0.159952	0.00290095	0.0254083	29
anovulation	-0.0535202	0.396221	0.660928	21
small placenta	-0.0826738	0.0284372	0.129885	59
decreased muscle weight	0.0695261	0.188006	0.448389	30
liver cysts	-0.0402385	0.659593	0.838149	10
hemolytic anemia	0.0562851	0.286524	0.558988	30
abnormal lymphocyte cell number	-0.0760076	2.59292e-14	6.23938e-12	956
impaired contextual conditioning behavior	-0.0638503	0.13906	0.379687	45
abnormal nervous system development	-0.0131061	0.185321	0.445677	975
decreased circulating renin level	-0.0645315	0.479939	0.727675	10
abnormal urine amino acid level	0.0946758	0.0362366	0.153599	41
decreased circulating interleukin-12b level	-0.108843	0.211469	0.478705	11
abnormal ear position	-0.0337571	0.536833	0.7689	28
abnormal spatial working memory	0.0343846	0.342694	0.612269	64
abnormal liver triglyceride level	0.0428257	0.0841835	0.275116	138
situs inversus	-0.132058	0.00981633	0.0633008	32
delayed dark adaptation	0.0158878	0.848924	0.932328	12
absent eyelids	0.0539277	0.48499	0.729396	14
impaired exercise endurance	0.0792588	0.0833031	0.272823	40
increased erythroid progenitor cell number	-0.0759671	0.101185	0.311737	39
abnormal axon extension	-0.0379453	0.29882	0.570612	63
abnormal endometrium morphology	-0.0659059	0.12678	0.359432	45
increased malignant tumor incidence	-0.0476546	0.00558615	0.0422147	293
abnormal behavioral response to light	-0.0677662	0.215039	0.482177	28
abnormal vertebrae morphology	-0.0362435	0.0146169	0.082523	399
abnormal sensory ganglion morphology	0.0159146	0.43292	0.689992	208
small thymus medulla	-0.24293	0.00783133	0.0540858	10
increased triiodothyronine level	0.043777	0.584876	0.799006	13
increased susceptibility to infection	-0.099221	5.41681e-12	5.50347e-10	426
impaired humoral immune response	-0.170527	0.0101244	0.06483	19
abnormal chemoreceptor morphology	0.133109	0.00730676	0.0513291	34
abnormal mammary gland physiology	0.00014204	0.996318	0.998064	89
absent lateral semicircular canal	-0.0225863	0.76993	0.891622	14
increased exploration in new environment	0.0554936	0.263413	0.536156	34
abnormal keratinocyte migration	-0.0231405	0.76445	0.890009	14
premature hair loss	0.0666123	0.32818	0.597309	18
abnormal nasal bone morphology	-0.0481099	0.198517	0.463307	60
kidney hemorrhage	-0.0697837	0.334104	0.603687	16
increased skeletal muscle glycogen level	0.0536057	0.444423	0.701619	17
abnormal nonmotile primary cilium morphology	0.0256205	0.585263	0.799006	38
decreased urine sodium level	0.0262991	0.618497	0.813121	30
abnormal urine homeostasis	0.0286376	0.0575213	0.209696	386
decreased dendritic cell number	-0.131612	0.000941528	0.0105249	53
decreased kidney weight	-0.0693699	0.0872102	0.282469	51
abnormal timing of vaginal opening	-0.107574	0.114324	0.337436	18
impaired embryo implantation	-0.00405156	0.95816	0.984983	14
abnormal midbrain development	-0.134964	0.0324017	0.143686	21
abnormal aqueous drainage system morphology	0.0639692	0.299354	0.571105	22
absent atrioventricular cushions	-0.115231	0.0822661	0.270396	19
decreased urine osmolality	0.0500539	0.204229	0.471821	54
loss of cortex neurons	-0.0314293	0.673588	0.844432	15
hemopericardium	-0.10936	0.0155593	0.0858096	41
abnormal fourth pharyngeal arch artery morphology	0.0102571	0.873917	0.944574	20
small premaxilla	-0.0564155	0.39491	0.660412	19
abnormal fetal atrioventricular canal morphology	-0.0447093	0.163052	0.413375	82
abnormal hypodermis morphology	-0.0181749	0.502824	0.743716	115
increased diameter of femur	0.0238293	0.78442	0.897901	11
abnormal cochlear inner hair cell morphology	0.113803	4.74721e-05	0.000838872	108
cecum inflammation	-0.0555469	0.456596	0.710779	15
abnormal interleukin-2 secretion	-0.140224	2.34555e-07	7.94359e-06	115
abnormal type I pneumocyte morphology	0.0110792	0.863906	0.941171	20
abnormal inner cell mass proliferation	-0.0770992	0.0464574	0.181707	56
abnormal gonadal fat pad morphology	-0.0168977	0.616318	0.811814	74
increased hamartoma incidence	-0.136824	0.134196	0.372722	10
abnormal pancreatic beta cell morphology	-0.0464334	0.0711574	0.243512	128
cervical vertebral transformation	0.011977	0.80655	0.908391	35
abnormal imprinting	-0.253944	0.000291435	0.00402092	17
mesocardia	0.0163167	0.851411	0.934162	11
embryonic lethality before implantation	-0.0643141	0.00976129	0.0630548	137
abnormal mammary gland epithelium physiology	-0.0620425	0.3761	0.644821	17
abnormal ectoplacental cone morphology	-0.120183	0.0140011	0.0809621	35
abnormal vocalization	0.00470443	0.91514	0.963172	43
increased circulating estrogen level	-0.0654669	0.380261	0.64823	15
abnormal hypoglossal nerve morphology	0.0851367	0.307361	0.58001	12
abnormal mitosis	-0.172813	1.11654e-09	6.15037e-08	105
increased circulating interferon-gamma level	-0.0344678	0.451369	0.706731	40
abnormal protein level	-0.0267799	0.0111717	0.0695199	840
abnormal circulating homocysteine level	0.0937573	0.304739	0.577657	10
abnormal small intestinal crypt cell proliferation	0.0277159	0.750346	0.883436	11
tonic seizures	-0.0246105	0.66433	0.839435	26
abnormal renal/urinary system physiology	0.0181297	0.143368	0.38717	588
impaired basement membrane formation	0.0498436	0.585328	0.799006	10
decreased salivation	-0.0656262	0.3637	0.632979	16
abnormal food preference	0.121887	0.102345	0.313831	15
absent seminal vesicle	-0.0806986	0.377033	0.645229	10
abnormal chromosome pairing during meiosis	-0.136192	0.136004	0.375262	10
skeletal muscle fiber atrophy	0.156384	0.0183603	0.0957165	19
double outlet right ventricle with atrioventricular septal defect	-0.0780135	0.312407	0.584658	14
abnormal skin tensile strength	0.172384	0.00287562	0.0252833	25
abnormal olfactory cortex morphology	0.0523424	0.418069	0.677565	20
abnormal optic vesicle formation	-0.0161752	0.767278	0.89115	28
increased kidney apoptosis	0.0320647	0.433738	0.690752	50
increased trabecular bone volume	0.0601442	0.200171	0.466272	38
abnormal phrenic nerve morphology	0.029637	0.60833	0.808797	25
slow postnatal weight gain	0.0316626	0.173793	0.426278	157
anisocytosis	-0.0646491	0.152699	0.398709	41
abnormal cervical atlas morphology	0.011749	0.792532	0.902479	42
impaired myelopoiesis	-0.147525	0.0769263	0.257284	12
abnormal chromosome stability	-0.104045	1.2387e-05	0.000268405	150
abnormal cornea morphology	0.0280392	0.210475	0.478705	170
abnormal chemical nociception	0.119434	0.0120597	0.0733281	37
abnormal limb morphology	0.0126481	0.306168	0.579148	591
increased muscle weight	0.0849031	0.30869	0.580394	12
ascites	-0.00608317	0.906794	0.960357	31
decreased bone mineral density	0.00370201	0.850978	0.933911	221
abnormal posterior eye segment morphology	0.014512	0.250111	0.526408	565
small trigeminal ganglion	0.0521214	0.484831	0.729396	15
disorganized pancreatic islets	-0.0129285	0.833864	0.924	22
short photoreceptor outer segment	0.045816	0.329126	0.598792	38
abnormal brain ependyma motile cilium morphology	-0.152603	0.0568753	0.207963	13
abnormal heart tube morphology	-0.0119947	0.718539	0.867255	76
abnormal pericyte morphology	-0.0561236	0.39736	0.661592	19
abnormal premaxilla morphology	-0.0319648	0.53195	0.764897	32
abnormal IgG3 level	-0.166244	6.44031e-09	3.03558e-07	103
abnormal T follicular helper cell morphology	-0.12154	0.145049	0.38918	12
thymus hypoplasia	-0.0544186	0.0139651	0.0809621	174
abnormal nitric oxide homeostasis	-0.0163208	0.724723	0.870325	39
abnormal epidermis stratum spinosum morphology	0.0834323	0.022346	0.108826	63
abnormal blood uric acid level	-0.00110531	0.987055	0.995197	18
abnormal action potential	0.0739138	0.00917346	0.0602601	105
abnormal glomerular capsule space morphology	-0.0940723	0.110967	0.331379	24
abnormal effector T cell number	-0.0695692	0.0124901	0.0751378	109
dilated heart right ventricle	-0.00867727	0.827381	0.919491	53
focal hepatic necrosis	-0.0643582	0.344813	0.614135	18
short humerus	0.0360566	0.378715	0.646559	50
abnormal hindlimb morphology	0.00814764	0.636205	0.824475	292
muscle twitch	0.0696747	0.054518	0.202306	64
small superior cervical ganglion	-0.0360937	0.66519	0.839721	12
increased bone volume	0.00728852	0.840597	0.92764	64
abnormal mitochondrial chromosome morphology	-0.0919851	0.202957	0.469832	16
enlarged lymphatic vessel	-0.073399	0.295045	0.567022	17
absent deltoid tuberosity	0.093621	0.261649	0.534284	12
abnormal mesenchymal cell proliferation involved in lung development	-0.0174255	0.82786	0.919577	13
abnormal motor learning	0.0302529	0.488233	0.732831	44
premature suture closure	0.0212489	0.7989	0.904027	12
abnormal adrenal gland zona fasciculata morphology	-0.0097936	0.899086	0.956181	14
decreased oligodendrocyte number	-0.0541973	0.413759	0.674721	19
abnormal caput epididymis morphology	-0.0743554	0.393321	0.65967	11
abnormal hippocampus CA3 region morphology	0.0653339	0.289163	0.560053	22
abnormal duodenum morphology	-0.0741927	0.134862	0.373689	34
increased cellular sensitivity to ionizing radiation	-0.067188	0.0493549	0.188484	72
abnormal second pharyngeal arch morphology	-0.00899913	0.866939	0.942827	29
abnormal circulating interleukin-10 level	-0.107536	0.0579434	0.210586	26
abnormal retinal cone cell morphology	0.04622	0.300796	0.573016	42
increased circulating glucocorticoid level	0.0195795	0.639493	0.825222	48
decreased litter size	-0.015239	0.383487	0.650817	283
enlarged lateral ventricles	0.0164984	0.646384	0.829755	65
abnormal spleen B cell follicle morphology	-0.119867	5.19882e-07	1.65026e-05	149
short stride length	0.0577805	0.150329	0.396141	52
abnormal platelet physiology	0.0451141	0.116943	0.341203	102
abnormal mast cell physiology	0.0471926	0.211007	0.478705	59
abnormal somite size	0.0298018	0.499659	0.741856	43
thin dermal layer	0.0388106	0.493769	0.737215	26
disorganized myocardium	-0.0310933	0.536985	0.7689	33
abnormal aorta wall morphology	0.0832813	0.0486513	0.188025	47
decreased circulating interferon-gamma level	-0.290016	3.15911e-07	1.04663e-05	26
increased circulating creatinine level	-0.00217666	0.948193	0.978808	75
increased double-negative T cell number	-0.0934459	0.00202846	0.0192409	92
abnormal total retina thickness	-0.0288718	0.61762	0.81306	25
abnormal thyroid-stimulating hormone level	-0.00495033	0.922887	0.966563	32
abnormal cochlear hair cell physiology	0.229267	7.35844e-06	0.000170776	32
abnormal circulating total protein level	-0.0501278	0.176776	0.431511	61
abnormal tumor latency	-0.0641483	0.0975732	0.304792	56
aciduria	0.133413	0.00355549	0.0295558	40
decreased mean platelet volume	0.0498848	0.549765	0.777299	12
increased fibroblast proliferation	-0.0669469	0.143518	0.387347	40
abnormal ischium morphology	-0.022905	0.802021	0.905169	10
abnormal snout morphology	-0.0217885	0.353845	0.623116	154
sparse hair	0.0895012	0.00383345	0.0313534	88
increased B cell apoptosis	-0.164452	0.00154963	0.0155712	31
decreased circulating potassium level	0.032964	0.546443	0.775159	28
abnormal interatrial septum morphology	-0.00664948	0.836634	0.925905	81
abnormal circulating interleukin-2 level	-0.0883412	0.270298	0.542638	13
absent vitelline blood vessels	-0.0468809	0.192344	0.453531	65
abnormal response to injury	0.00842946	0.542489	0.772494	463
abnormal transitional stage B cell morphology	-0.104637	0.00596166	0.0442479	58
abnormal mononuclear phagocyte morphology	-0.0525385	0.00011846	0.00184218	477
abnormal circulating carnitine level	0.298175	0.00109848	0.0118475	10
abnormal semicircular canal ampulla morphology	0.0577642	0.244376	0.518987	34
abnormal temporal memory	0.0190898	0.436599	0.693583	141
abnormal olfactory bulb development	0.134473	0.0033004	0.0279321	40
abnormal consumption behavior	0.0297705	0.0189859	0.0977518	558
decreased follicular dendritic cell number	-0.294886	0.000710919	0.00822867	11
abnormal facial nerve morphology	0.0151293	0.793627	0.902663	25
increased circulating free fatty acid level	0.0300887	0.350791	0.618761	81
abnormal compact bone mass	-0.0318373	0.691157	0.85291	13
small clavicle	-0.0852332	0.327832	0.596913	11
short snout	-0.0341585	0.211854	0.478705	113
abnormal urine phosphate level	0.036622	0.612233	0.811107	16
abnormal myocardium layer morphology	-0.00816033	0.592512	0.801326	377
abnormal primary sex determination	-0.0637249	1.04238e-05	0.000233617	422
increased circulating aldosterone level	0.115771	0.0498214	0.188875	24
abnormal skin appearance	0.0164187	0.268669	0.541841	399
small second pharyngeal arch	-0.0563815	0.44986	0.705335	15
no spontaneous movement	0.0613581	0.288711	0.560053	25
abnormal hair medulla	0.171497	0.0489744	0.188319	11
increased T-helper cell number	-0.0623465	0.196106	0.459794	36
iris hypoplasia	0.105717	0.204964	0.472121	12
demyelination	0.00247579	0.938803	0.975051	81
abnormal acute inflammation	-0.076385	6.80776e-06	0.000159616	301
decreased cerebellar granule cell number	-0.048201	0.563316	0.784969	12
thick ventricular wall	0.0395288	0.344322	0.613738	48
microcytosis	-0.0414412	0.532015	0.764897	19
abnormal lean body mass	-0.0235091	0.211603	0.478705	243
increased interleukin-5 secretion	0.0533999	0.375747	0.644821	23
abnormal circulating gonadotropin level	-0.0556005	0.0774338	0.258603	85
abnormal placenta metrial gland morphology	-0.131785	0.0600996	0.215173	17
abnormal T cell apoptosis	-0.0388104	0.139149	0.379687	123
abnormal neurotransmitter secretion	0.0137479	0.713301	0.863668	60
abnormal retinol level	0.12993	0.154942	0.402727	10
abnormal cerebellum anterior lobe morphology	0.0844305	0.31139	0.584192	12
azoospermia	-0.0611171	0.0110196	0.0688274	147
abnormal aorta smooth muscle morphology	0.0732955	0.379509	0.647672	12
abnormal myeloid cell morphology	-0.0372518	2.83179e-05	0.00052602	1259
abnormal hair follicle regression	-0.0185939	0.816518	0.914738	13
decreased trophoblast giant cell number	-0.0721679	0.124252	0.355272	38
decreased atrioventricular cushion size	-0.0130721	0.843728	0.929113	19
decreased IgG3 level	-0.192531	5.79213e-09	2.76589e-07	77
abnormal optic nerve morphology	0.0218145	0.473658	0.723987	91
increased circulating estradiol level	-0.10372	0.179255	0.436398	14
gastrointestinal tract polyps	-0.081114	0.221254	0.491033	19
increased growth hormone level	-0.0071791	0.916074	0.963712	18
abnormal thymus development	0.00511802	0.935339	0.972786	21
thick pulmonary valve	0.0058269	0.942036	0.97642	13
absent lymphocyte	-0.083499	0.00730866	0.0513291	87
organ of Corti degeneration	0.0958075	0.0264397	0.123224	45
pulmonary hypertension	0.10967	0.229938	0.500609	10
abnormal sperm number	-0.0818569	5.66365e-07	1.74961e-05	325
small pharyngeal arch	-0.0370298	0.39094	0.657789	45
abnormal digestive system development	-0.0193476	0.566153	0.786047	74
decreased circulating levels of thyroid hormone	0.0357284	0.429337	0.688043	41
decreased platelet serotonin level	0.0134924	0.871486	0.94371	12
decreased NK cell number	-0.0789248	0.0184726	0.0959736	75
increased body mass index	-0.138896	0.1284	0.362597	10
abnormal synaptic vesicle number	0.150345	0.00244646	0.0224152	34
increased vasodilation	0.0785292	0.213196	0.479911	21
abnormal thymus corticomedullary boundary morphology	-0.00931314	0.872066	0.94371	25
abnormal muscle relaxation	0.0956013	0.0153131	0.0851323	54
lumbar vertebral transformation	-0.0958547	0.0439272	0.174791	37
abnormal forelimb stylopod morphology	0.022415	0.471468	0.722407	87
abnormal male germ cell apoptosis	-0.069386	0.00899611	0.059609	120
ruptured lens capsule	0.175955	0.028115	0.129188	13
vestibular hair cell degeneration	0.0907783	0.239806	0.514854	14
arrested B cell differentiation	-0.0992788	0.0117968	0.0722988	54
altered response to CNS ischemic injury	0.0221005	0.506647	0.745665	76
abnormal enterocyte physiology	0.0235229	0.539957	0.771222	57
small nasal bone	-0.0487798	0.274818	0.545342	42
decreased heart weight	-0.0617591	0.0708097	0.242867	72
abnormal splenocyte physiology	-0.102252	0.00340213	0.0285404	69
increased NK T cell number	0.0407222	0.561276	0.784499	17
increased cell nucleus count	-0.117384	0.128516	0.362702	14
increased tumor latency	-0.111065	0.059868	0.214782	24
bile duct proliferation	-0.112889	0.216549	0.48485	10
decreased birth body size	-0.0298028	0.158875	0.406815	191
decreased skeletal muscle fiber number	0.130182	0.0390547	0.161733	21
flaky skin	0.051243	0.45194	0.706731	18
abnormal enterocyte morphology	0.00823422	0.872085	0.94371	32
abnormal adipose tissue morphology	0.00797147	0.486974	0.731421	697
decreased cochlear hair cell number	0.0938553	0.0296705	0.134443	45
abnormal ventral commissure morphology	0.0258941	0.562122	0.784499	42
abnormal skeleton development	-0.0125453	0.394679	0.660412	405
cleft upper lip	-0.0447126	0.511615	0.749672	18
abnormal ureteric bud morphology	-0.0125707	0.739001	0.877509	59
abnormal intestinal goblet cell morphology	-0.000418315	0.991229	0.995773	58
abnormal lumbar dorsal root ganglion morphology	-0.0177143	0.812335	0.912458	15
increased splenocyte number	-0.0610857	0.321667	0.593622	22
aortic aneurysm	-0.0321904	0.618477	0.813121	20
decreased hemoglobin content	-0.0250274	0.28384	0.555768	156
abnormal lymph node B cell domain morphology	-0.21832	1.76093e-07	6.24105e-06	48
decreased long bone epiphyseal plate size	0.0195816	0.693119	0.853931	34
decreased aggression	0.0707324	0.109128	0.327962	43
abnormal circulating glucose level	0.0174583	0.172136	0.423349	549
abnormal cerebellar foliation	0.00386757	0.904536	0.958925	81
abnormal nephron morphology	-0.0353784	0.0178226	0.0934458	394
decreased follicular B cell number	-0.137613	0.000780522	0.0089662	50
abnormal double-negative T cell morphology	-0.0994064	5.0995e-05	0.000893292	141
abnormal B cell activation	-0.0974703	2.12136e-05	0.000425389	162
abnormal umbilical cord morphology	0.086352	0.120781	0.348619	27
decreased retroperitoneal fat pad weight	-0.0116903	0.867547	0.942867	17
abnormal sixth pharyngeal arch morphology	0.0513662	0.450854	0.706168	18
retinal degeneration	0.0518943	0.0900201	0.288682	90
abnormal hippocampus CA1 region morphology	0.0695823	0.211227	0.478705	27
abnormal melanocyte morphology	-0.00272357	0.942939	0.976601	58
small lens	0.063046	0.123762	0.354499	50
reduced cerebellar foliation	-0.00817897	0.894436	0.953458	22
abnormal double-strand DNA break repair	-0.154946	0.00286132	0.0252061	31
increased physiological sensitivity to xenobiotic	-0.0103455	0.590905	0.801245	232
abnormal spinal reflex	0.0427707	0.147088	0.391437	97
increased glycogen level	-0.0055108	0.887824	0.950839	55
abnormal lymph node size	-0.0744668	0.000340302	0.00456264	198
enlarged otoliths	0.112179	0.219454	0.48896	10
abnormal susceptibility to hearing loss	0.130553	0.010686	0.0671105	32
abnormal kidney pyramid morphology	-0.103997	0.0666942	0.231248	26
abnormal external female genitalia morphology	-0.0422121	0.535507	0.768033	18
prolonged diestrus	-0.0492333	0.446253	0.702373	20
decreased mitochondrial DNA content	-0.108748	0.192276	0.453531	12
abnormal acrosome morphology	-0.0773924	0.0669191	0.231783	47
weakness	0.00620143	0.819921	0.915429	114
abnormal parental behavior	0.123131	4.77158e-07	1.54721e-05	142
increased organ/body region tumor incidence	-0.0464824	0.000813115	0.0092939	460
abnormal kidney blood vessel morphology	-0.044997	0.165498	0.416651	80
abnormal circadian phase	-0.000578099	0.991713	0.995773	27
small ovary	-0.108464	4.77049e-05	0.000838872	119
hyperresponsive to tactile stimuli	-0.0525109	0.54662	0.775169	11
immune system phenotype	-0.0467022	2.11412e-11	1.82373e-09	2582
decreased circulating interleukin-6 level	-0.143473	0.000524921	0.0065039	49
abnormal deltoid tuberosity morphology	0.0401266	0.505673	0.745545	23
decreased DN4 thymocyte number	-0.10169	0.187919	0.448389	14
impaired macrophage phagocytosis	0.00932763	0.828906	0.920291	45
micrognathia	-0.00781213	0.841508	0.927905	55
decreased thymocyte number	-0.0769571	0.0013201	0.0135772	148
decreased physiological sensitivity to xenobiotic	-0.000913363	0.961062	0.98535	246
brain inflammation	-0.121502	0.0395326	0.162979	24
abnormal dermal layer morphology	0.0675444	0.0148417	0.0835665	110
increased thermal nociceptive threshold	0.0641448	0.0404682	0.165728	86
pancreas atrophy	0.00431913	0.960454	0.98535	11
abnormal insulin secretion	0.00904222	0.710605	0.862918	143
dilated uterus	-0.0258081	0.767015	0.89115	11
abnormal gas homeostasis	0.00662097	0.621957	0.815248	494
abnormal white adipose tissue amount	-0.0207982	0.305435	0.578719	208
abnormal blood circulation	0.00767707	0.531691	0.764897	600
increased classified tumor incidence	-0.0423876	0.00293627	0.0256685	435
absent CD4-positive	0.0578858	0.395497	0.660413	18
craniorachischisis	-0.0150069	0.825651	0.918718	18
abnormal oculomotor nerve morphology	-0.002789	0.975644	0.991255	10
intestine polyps	-0.083263	0.234897	0.506859	17
abnormal podocyte slit diaphragm morphology	-0.0828879	0.320314	0.592897	12
decreased susceptibility to experimental autoimmune encephalomyelitis	-0.13838	2.25094e-05	0.00044359	79
increased gamma-delta T cell number	-0.145735	0.0135421	0.0797867	24
abnormal pituitary gland physiology	0.0368373	0.524151	0.760793	25
athymia	0.0403821	0.614323	0.811744	13
delayed heart development	-0.0788211	0.290788	0.561912	15
rough coat	0.132564	0.0586012	0.211798	17
abnormal basioccipital bone morphology	0.0211416	0.698904	0.856411	28
abnormal nonassociative learning	0.0206355	0.782113	0.897771	15
abnormal circulating interleukin-6 level	-0.114793	2.1362e-05	0.000426494	116
intestinal edema	0.00934185	0.900362	0.956426	15
abnormal sensorimotor gating	-0.0387976	0.603076	0.806395	15
abnormal basophil cell number	0.0179249	0.730093	0.872219	31
eye inflammation	0.0189572	0.584455	0.799006	70
abnormal exocrine pancreas physiology	0.00988838	0.909618	0.960382	11
fused carpal bones	0.0428621	0.565659	0.786041	15
absent pharyngeal arches	-0.0312056	0.72016	0.867684	11
head shaking	0.174544	0.00566038	0.0425645	21
decreased inner hair cell stereocilia number	0.241012	0.00565997	0.0425645	11
decreased body height	-0.032978	0.546273	0.775158	28
decreased pancreatic alpha cell number	-0.00486871	0.944625	0.977331	17
increased rib number	-0.0638704	0.157704	0.405524	41
abnormal eye pigmentation	-0.0375188	0.111512	0.332292	153
abnormal Meibomian gland morphology	0.0642512	0.332591	0.602698	19
abnormal pulmonary circulation	0.0253466	0.471041	0.722407	68
dilated kidney collecting duct	0.0411345	0.459864	0.714163	27
abnormal male accessory sex gland morphology	-0.0709986	0.00829525	0.0565797	117
mortality/aging	-0.0135912	0.039089	0.161733	3857
increased testis tumor incidence	-0.113355	0.0659101	0.229634	22
abnormal basal metabolism	-0.00559769	0.907601	0.960382	36
increased susceptibility to pharmacologically induced seizures	0.0292771	0.323445	0.594646	96
abnormal seminal vesicle morphology	-0.0750586	0.0223412	0.108826	78
abnormal pancreatic acinus morphology	-0.0190127	0.652628	0.832871	47
increased circulating levels of thyroid hormone	0.0335272	0.675674	0.845219	13
diluted coat color	0.0031498	0.934028	0.971865	58
alpha beta T cells	0.0578858	0.395497	0.660413	18
abnormal sternebra number	-0.185971	0.0327627	0.144465	11
abnormal circulating interferon-alpha level	-0.157612	0.0492086	0.188484	13
skeletal muscle fiber degeneration	0.19049	0.0223746	0.108826	12
abnormal presacral vertebrae morphology	-0.0474296	0.0183307	0.0956712	212
paresis	0.0249107	0.686106	0.85043	22
decreased hindbrain size	0.139619	0.126423	0.358788	10
increased tumor necrosis factor secretion	-0.0588808	0.0459326	0.180415	97
increased B-1a cell number	-0.149583	0.101542	0.312204	10
increased ventricle muscle contractility	0.18556	0.0422297	0.170109	10
increased thyroid-stimulating hormone level	0.0323644	0.607928	0.808749	21
decreased mean systemic arterial blood pressure	0.085167	0.106817	0.323421	30
decreased erythroid progenitor cell number	-0.101976	0.00642172	0.0468263	60
abnormal IgA level	-0.168209	2.56482e-09	1.33254e-07	106
abnormal postnatal growth/weight/body size	0.0213286	0.00274064	0.0247144	2383
abnormal compact bone volume	0.0668319	0.370408	0.640233	15
abnormal hair growth	0.0476872	0.0121233	0.0735118	238
increased trophoblast giant cell number	-0.178311	0.0209484	0.104341	14
abnormal muscle cell glucose uptake	0.0321925	0.381854	0.649976	62
enlarged mesenteric lymph nodes	-0.126679	0.0795374	0.263893	16
increased circulating creatine kinase level	0.103091	0.0872672	0.282469	23
disorganized retinal layers	0.0273127	0.705403	0.860946	16
dilated renal glomerular capsule	-0.00114347	0.989526	0.995197	11
hematuria	-0.00109818	0.989066	0.995197	13
oligozoospermia	-0.105432	8.10053e-07	2.39817e-05	187
complete lethality during fetal growth through weaning	-0.117706	0.141884	0.384297	13
increased kidney tumor incidence	-0.126849	0.145326	0.389696	11
abnormal drinking behavior	0.0275556	0.275182	0.545828	133
increased circulating chloride level	-0.0220478	0.666383	0.840006	32
abnormal circulating HDL cholesterol level	4.8362e-05	0.998337	0.999151	158
dark foot pads	-0.0785679	0.367072	0.636667	11
absent olfactory bulb	-0.0981134	0.188524	0.448923	15
abnormal vascular wound healing	0.0060596	0.874551	0.945036	57
decreased osteoclast cell number	-0.0275957	0.483956	0.729284	54
abnormal cerebral cortex pyramidal cell morphology	0.0725702	0.132399	0.369328	36
abnormal crypts of Lieberkuhn morphology	-0.0145	0.58361	0.799006	121
increased IgG2a level	-0.157954	5.19499e-06	0.00012979	70
abnormal mammary gland growth during lactation	0.0446204	0.382937	0.65076	32
abnormal pituitary diverticulum morphology	-0.0946702	0.11634	0.341112	23
increased creatine kinase level	0.103091	0.0872672	0.282469	23
abnormal Langerhans cell number	-0.101953	0.241827	0.516966	11
retinal ganglion cell degeneration	-0.0833768	0.263801	0.536282	15
altered tumor morphology	-0.0696737	0.00375577	0.0308838	147
abnormal skin sebaceous gland morphology	0.0606312	0.314557	0.586523	23
abnormal heart valve morphology	-0.0198159	0.451986	0.706731	122
abnormal zygomatic bone morphology	-0.00743014	0.897772	0.955456	25
abnormal food intake	0.01428	0.362723	0.631768	355
abnormal circulating noradrenaline level	-0.0259045	0.674289	0.844973	22
abnormal glial cell apoptosis	-0.132908	0.1457	0.390013	10
increased anti-nuclear antigen antibody level	-0.101785	0.000333211	0.00449392	105
increased heart left ventricle size	0.0943514	0.00146204	0.014756	96
abnormal sperm motility	-0.0641244	0.0055768	0.0422138	159
abnormal endolymph	0.029467	0.624999	0.817128	23
decreased pancreatic islet number	-0.198601	0.0132023	0.0782893	13
abnormal circadian rhythm	0.000768154	0.980996	0.992591	81
abnormal mandibular condyloid process morphology	0.0230829	0.757042	0.887031	15
abnormal external male genitalia morphology	-0.128204	0.00456952	0.0362077	41
dry eyes	0.0396026	0.634909	0.824475	12
myopathy	0.12334	0.00778421	0.0538418	39
abnormal tegmentum morphology	-0.212094	0.0202484	0.10252	10
decreased circulating glucocorticoid level	-0.0292233	0.550177	0.77732	35
abnormal magnesium ion homeostasis	0.0104763	0.847999	0.931695	28
umbilical hernia	0.0208067	0.81983	0.915429	10
abnormal pharyngeal arch morphology	-0.0256985	0.310632	0.583249	132
thin myometrium	0.0338134	0.711277	0.863046	10
increased B cell derived lymphoma incidence	-0.0907758	0.00931839	0.0611244	69
weight loss	-0.00247815	0.877027	0.945727	340
abnormal utricular macula morphology	-0.0172123	0.784972	0.897901	21
abnormal exocrine gland physiology	-0.0123464	0.574916	0.792719	176
abnormal erythrocyte physiology	0.025103	0.583341	0.798992	40
abnormal spinal cord dorsal horn morphology	0.0383763	0.632022	0.82278	13
decreased IgA level	-0.225947	9.98101e-09	4.47384e-07	54
abnormal circulating creatinine level	0.0100307	0.705705	0.861084	120
impaired ovarian folliculogenesis	-0.0959492	0.0384252	0.1604	39
aorta stenosis	-0.0316956	0.728622	0.871602	10
abnormal corticospinal tract morphology	0.167634	0.0203282	0.102583	16
cataract	0.084469	0.000602941	0.00717319	140
abnormal pancreatic acinar cell morphology	-0.00649535	0.884386	0.948712	42
abnormal inhibitory postsynaptic currents	0.10495	0.00246455	0.0224909	70
abnormal mesenteric lymph node morphology	-0.164972	0.000221428	0.00318355	42
increased susceptibility to systemic lupus erythematosus	-0.113449	0.0656839	0.229242	22
abnormal myocardium compact layer morphology	-0.0519665	0.179557	0.436901	56
disorganized photoreceptor outer segment	-0.016136	0.802869	0.905679	20
pancytopenia	-0.115262	0.0614863	0.219108	22
hypokalemia	0.0160619	0.853705	0.935331	11
decreased forebrain size	-0.0269364	0.515017	0.753009	49
abnormal corpus luteum morphology	-0.0779272	0.00967283	0.0628184	93
persistence of hyaloid vascular system	-0.0138095	0.787139	0.898577	32
abnormal fourth ventricle morphology	-0.0766619	0.176459	0.430968	26
decreased diameter of long bones	-0.0759365	0.207821	0.474603	23
increased hematopoietic cell number	-0.0573333	1.30149e-08	5.6136e-07	933
abnormal trachea morphology	0.0447705	0.213135	0.479911	65
decreased immunoglobulin level	-0.134418	2.50787e-14	6.23938e-12	278
stria vascularis degeneration	0.0934418	0.262564	0.535433	12
abnormal ovary physiology	-0.0789896	0.141385	0.383359	29
increased pituitary adenoma incidence	-0.157119	0.0178193	0.0934458	19
abnormal roof plate morphology	-0.125818	0.148625	0.394149	11
increased anti-histone antibody level	-0.149057	0.0457468	0.18015	15
abnormal breathing pattern	0.0262986	0.135929	0.375262	278
preference for addictive substance	0.0765281	0.402186	0.665989	10
abnormal enterocyte apoptosis	0.0485981	0.391498	0.658141	26
abnormal sagittal suture morphology	-0.0802469	0.282149	0.554356	15
abnormal reflex	0.0563267	5.3638e-06	0.000133279	589
absent fibula	-0.0618142	0.498625	0.74137	10
increased susceptibility to endotoxin shock	-0.105462	0.00388169	0.0316291	63
lymph node hypoplasia	-0.029942	0.492714	0.736895	44
paralysis	0.026508	0.324329	0.595038	117
abnormal prostate gland physiology	-0.0235982	0.70835	0.862449	21
abnormal cytotoxic T cell cytolysis	-0.10518	0.0185395	0.0961026	42
absent visceral yolk sac blood islands	-0.132956	0.0851367	0.277438	14
uveal coloboma	0.00974026	0.910966	0.960382	11
abnormal circulating non-HDL cholesterol level	-0.00991104	0.717168	0.866286	113
decreased circulating chloride level	-0.00259401	0.962147	0.98535	28
increased susceptibility to bacterial infection	-0.0852898	1.7066e-06	4.75766e-05	272
abnormal spiral ligament morphology	-0.0821907	0.255284	0.529211	16
abnormal pulmonary acinus morphology	0.0187205	0.343157	0.612618	220
thin cerebral cortex	-0.0342697	0.287914	0.559908	81
increased mast cell number	-0.160234	0.0222592	0.108728	17
abnormal endoderm development	-0.0147175	0.727519	0.870737	47
abnormal lymph node cell ratio	-0.0291895	0.620914	0.814496	24
increased apoptosis	-0.0353615	0.002829	0.0250662	649
scaly skin	0.0174335	0.65835	0.837909	54
abnormal epidermis stratum corneum morphology	0.0890543	0.000488014	0.00612967	130
abnormal head size	-0.00318293	0.916733	0.96374	91
abnormal Meckel's cartilage morphology	0.00620396	0.893511	0.953357	39
abnormal dorsal aorta morphology	-0.0373029	0.262346	0.535227	76
abnormal intestinal mucosa morphology	-0.010066	0.658687	0.837928	164
abnormal pancreas secretion	0.00330183	0.888618	0.951243	153
partial embryonic lethality between implantation and somite formation	-0.050597	0.43376	0.690752	20
abnormal rostral-caudal body axis extension	-0.0645339	0.37174	0.640865	16
abnormal cerebellum anterior vermis morphology	0.0499929	0.566018	0.786047	11
increased skin squamous cell carcinoma incidence	0.096901	0.22659	0.496629	13
increased pre-B cell number	-0.107125	0.0542629	0.201699	27
abnormal glial cell physiology	0.013235	0.672472	0.843958	86
abnormal liver morphology	-0.0156444	0.13807	0.378223	841
decreased urine potassium level	-0.0559433	0.411545	0.674117	18
abnormal muscle fiber morphology	0.0589716	0.000226529	0.00323653	341
abnormal platelet activation	0.0682167	0.0430869	0.172479	74
abnormal pancreas weight	-0.0741387	0.251389	0.526784	20
abnormal respiratory quotient	-0.0155545	0.569686	0.788527	113
abnormal prostate gland weight	-0.141693	0.0575609	0.209696	15
abnormal a wave amplitude	-0.0949137	0.219064	0.488809	14
mesangiolysis	-0.0143669	0.863236	0.940965	12
decreased susceptibility to autoimmune disorder	-0.11262	7.1649e-07	2.15513e-05	165
abnormal mean corpuscular volume	-0.000911729	0.968662	0.988638	158
abnormal small intestine morphology	0.0121639	0.602446	0.806395	156
abnormal muscle electrophysiology	0.113846	0.0781912	0.260371	20
kidney cysts	-0.0162889	0.52992	0.764529	126
increased astrocyte number	0.0423359	0.151244	0.397182	97
abnormal vein morphology	-0.00817743	0.784898	0.897901	94
abnormal anxiety-related response	0.0389121	0.0307794	0.138099	266
duplex kidney	-0.0494477	0.521984	0.759628	14
abnormal circulating cytokine level	-0.101424	1.80398e-08	7.63684e-07	266
decreased mean corpuscular hemoglobin	0.00694718	0.838953	0.926496	72
abnormal kinocilium morphology	0.102256	0.170537	0.422292	15
abnormal male reproductive system physiology	-0.0470286	2.61146e-05	0.000491341	737
abnormal skeletal muscle size	0.0853059	0.0185704	0.0961537	64
short rostral-caudal axis	-0.0324972	0.652857	0.832871	16
fatigue	0.0839405	0.0446287	0.176813	48
increased IgM level	-0.114081	3.30412e-05	0.000601849	112
abnormal sternum ossification	-0.0544698	0.233974	0.506403	40
abnormal prepulse inhibition	0.0515455	0.0595687	0.214279	113
abnormal skeletal muscle mechanoreceptor morphology	0.00336858	0.961671	0.98535	17
decreased circulating testosterone level	-0.123007	0.00325329	0.02775	48
decreased circulating aspartate transaminase level	0.0824446	0.191249	0.452763	21
abnormal allantois morphology	-0.0284271	0.369437	0.63883	84
absent tail	0.0216223	0.771976	0.893298	15
abnormal autopod morphology	0.021087	0.220117	0.489959	293
pulmonary fibrosis	-0.0354732	0.462023	0.7163	36
akinesia	0.0241172	0.730802	0.872839	17
thin placenta labyrinth	-0.0181928	0.820408	0.915748	13
hemorrhage	0.00140111	0.917761	0.963934	483
kyphosis	0.0512535	0.0151374	0.0847394	192
tracheoesophageal fistula	0.00366784	0.958269	0.984983	17
small thyroid gland	0.001151	0.986899	0.995197	17
enhanced behavioral response to addictive substance	0.0237963	0.603093	0.806395	40
abnormal active avoidance behavior	0.0757363	0.326743	0.596467	14
abnormal ovarian folliculogenesis	-0.0955981	0.00189751	0.0183413	89
increased spleen white pulp amount	-0.0971867	0.0753879	0.25381	28
absent ovarian follicles	-0.173904	0.000144771	0.00217088	40
abnormal wound healing	0.00616073	0.785652	0.89845	166
abnormal adaptive thermogenesis	0.123233	0.000503718	0.00628706	67
abnormal stomach epithelium morphology	-0.0447819	0.316086	0.586979	42
liver failure	-0.101596	0.188324	0.44868	14
increased plasma cell number	-0.07805	0.100892	0.311639	37
increased food intake	0.00012856	0.995908	0.998064	135
abnormal alveolar lamellar body morphology	-0.0213963	0.67567	0.845219	32
abnormal circulating interferon-gamma level	-0.129233	0.00036216	0.00477174	64
decreased renal glomerulus number	-0.0279584	0.556759	0.780659	37
abnormal circulating potassium level	0.0277983	0.472796	0.723193	56
increased mortality induced by gamma-irradiation	-0.0292297	0.586299	0.799006	29
increased liver weight	0.0569858	0.0426044	0.171166	107
abnormal brain ventricle morphology	-0.0276147	0.14881	0.394411	235
abnormal respiratory mechanics	0.084129	0.0184106	0.0957947	66
increased circulating testosterone level	0.0139923	0.832884	0.923363	19
abnormal urine pH	0.0624685	0.253079	0.527622	28
abnormal pancreatic beta cell differentiation	-0.0806028	0.296619	0.569397	14
abnormal basophil morphology	0.0179249	0.730093	0.872219	31
increased thymus tumor incidence	-0.0796991	0.0128998	0.0770018	82
abnormal blood urea nitrogen level	-0.0222552	0.325885	0.596467	166
increased CD8-positive	-0.0888252	0.000867546	0.00979363	119
vascular ring	-0.0386652	0.479314	0.727564	28
absent pre-B cells	0.00749381	0.934621	0.972261	10
abnormal soleus weight	0.218884	0.0165732	0.0896071	10
partial perinatal lethality	-0.0326486	0.0714886	0.244462	263
abnormal pulmonary artery morphology	-0.00434524	0.911439	0.960382	55
abnormal stomach pyloric region morphology	-0.115848	0.164834	0.416333	12
increased circulating potassium level	0.0286141	0.587944	0.799006	30
increased double-positive T cell number	-0.0832217	0.059428	0.213941	43
abnormal aorta elastic tissue morphology	0.0623858	0.290513	0.561617	24
abnormal sex gland morphology	-0.0528497	4.81499e-06	0.000122301	685
seminiferous tubule degeneration	-0.0606686	0.0648144	0.227074	78
abnormal thyroid gland morphology	-0.0278358	0.484227	0.729396	53
increased neutrophil cell number	0.0032162	0.890458	0.952321	156
abnormal keratinocyte morphology	0.00967379	0.791106	0.901529	63
ostium primum atrial septal defect	0.0152191	0.838375	0.926496	15
abnormal body temperature homeostasis	0.0367462	0.334193	0.603687	58
decreased incidence of tumors by chemical induction	-0.0840149	0.0146549	0.0826168	71
abnormal B-1 B cell morphology	-0.123526	0.000140612	0.00213581	80
abnormal circulating leptin level	-0.00634126	0.762611	0.889907	194
abnormal sperm axoneme morphology	-0.0677821	0.33355	0.603122	17
abnormal ameloblast morphology	0.0537355	0.405788	0.668332	20
abnormal lung hysteresivity	0.0553329	0.507054	0.745824	12
decreased eosinophil cell number	-0.0996381	0.0114951	0.0710208	54
abnormal eye development	0.0298772	0.11828	0.343785	235
abnormal pericardial cavity morphology	-0.0660815	0.0136135	0.0798985	118
reduced linear vestibular evoked potential	0.0677769	0.416428	0.675623	12
increased rhabdomyosarcoma incidence	-0.078472	0.346773	0.614276	12
decreased B-2 B cell number	-0.207999	0.00707401	0.0502992	14
hypochromic anemia	0.0160129	0.799625	0.904027	21
short premaxilla	-0.0840816	0.276261	0.547018	14
abnormal renal transport	0.192418	0.00111363	0.011924	24
decreased luteinizing hormone level	-0.0910461	0.0750274	0.253259	32
anal atresia	0.0471372	0.58841	0.799006	11
absent lymph nodes	-0.192819	0.00761177	0.0529696	16
hypoactivity	0.0375385	0.0133487	0.0789522	381
hemoperitoneum	0.07646	0.289924	0.560953	16
abnormal response to infection	-0.0859624	1.46728e-11	1.34168e-09	554
abnormal hyoid bone morphology	-0.0407458	0.398198	0.662503	36
abnormal interleukin-4 secretion	-0.103625	0.00011672	0.00182755	117
abnormal circulating interleukin-5 level	-0.239211	0.00602939	0.0446057	11
abnormal intestinal cholesterol absorption	0.233033	0.00178888	0.0175134	15
increased white fat cell size	0.0716691	0.267528	0.540732	20
protruding tongue	0.103078	0.236668	0.510158	11
cochlear outer hair cell degeneration	0.105063	0.00374049	0.0308136	64
abnormal retroperitoneal fat pad morphology	-0.0406422	0.426783	0.686336	32
decreased T cell proliferation	-0.0741665	0.000595429	0.00712645	183
abnormal mammary gland growth during pregnancy	-0.0278461	0.518832	0.756495	45
abnormal hippocampus development	0.0626224	0.288687	0.560053	24
polyploidy	-0.14564	0.0136033	0.0798985	24
cardiac fibrosis	0.0478403	0.0458827	0.180375	148
pancreas cysts	-0.0528442	0.464523	0.718156	16
paternal imprinting	-0.201577	0.00904938	0.0597991	14
abnormal somatic nervous system physiology	0.182729	3.05556e-07	1.01971e-05	66
abnormal mandibular coronoid process morphology	0.0448313	0.547941	0.776561	15
abnormal artery development	-0.0227347	0.401941	0.665966	115
decreased mean corpuscular hemoglobin concentration	0.0636219	0.164479	0.415699	40
increased susceptibility to type IV hypersensitivity reaction	-0.0192559	0.749421	0.883309	23
rectal hemorrhage	-0.020479	0.783724	0.897901	15
abnormal optic choroid morphology	0.0110478	0.813963	0.913684	38
increased pituitary gland tumor incidence	-0.151543	0.00753832	0.0527798	26
focal hair loss	0.0848209	0.0746087	0.252488	37
abnormal fetal ductus arteriosus morphology	0.0435563	0.51129	0.749672	19
loss of hippocampal neurons	0.0619516	0.422437	0.681985	14
abnormal salivary gland duct morphology	0.0281543	0.746532	0.880721	11
respiratory failure	0.00671053	0.769063	0.891622	163
decreased ventricle muscle contractility	0.0777959	0.0101935	0.0650902	92
absent mature ovarian follicles	-0.112193	0.0336348	0.147015	30
prolonged QT interval	0.0575922	0.300777	0.573016	27
abnormal incus morphology	0.035424	0.556809	0.780659	23
abnormal developmental vascular remodeling	-0.0243983	0.559429	0.783372	48
short incisors	0.0389932	0.60125	0.806133	15
decreased Schwann cell number	0.00212923	0.979633	0.992591	12
abnormal sympathetic neuron morphology	-0.133848	0.094872	0.299353	13
abnormal quadriceps weight	0.0618845	0.391695	0.658141	16
abnormal neuron proliferation	-0.0310592	0.273577	0.54417	105
decreased IgG level	-0.1511	1.17819e-14	3.59112e-12	224
decreased regulatory T cell number	-0.140951	0.000272322	0.0038192	56
abnormal heart ventricle morphology	0.000506059	0.96859	0.988638	543
abnormal intestine morphology	-0.0130082	0.39477	0.660412	375
abnormal bone trabecula morphology	0.023523	0.415948	0.675324	101
abnormal proximal convoluted tubule brush border morphology	-0.0252532	0.752666	0.884625	13
abnormal common myeloid progenitor cell morphology	-0.0620638	0.0251856	0.11871	110
abnormal chemokine level	-0.0893557	0.0234227	0.11237	54
abnormal inflammatory response	-0.0240083	0.0123902	0.0747333	1047
abnormal renal tubule morphology	-0.0331043	0.0958814	0.300872	217
decreased body weight	0.0164569	0.0497225	0.188875	1464
abnormal lymphatic vessel morphology	0.0177463	0.674389	0.844973	47
increased total tissue mass	-0.00876982	0.635967	0.824475	251
thick skin	-0.0144385	0.774353	0.893661	33
absent embryonic epiblast	-0.157552	0.0845879	0.276043	10
abnormal thymus epithelium morphology	-0.0623242	0.419652	0.678687	14
abnormal olfaction	0.13489	0.00320467	0.0273864	40
abnormal natural killer cell mediated cytotoxicity	-0.0865965	0.0217234	0.106452	59
increased uterus tumor incidence	-0.0802721	0.214285	0.481434	20
abnormal heart atrium morphology	-0.00380691	0.861584	0.940965	179
aphagia	0.00895275	0.744583	0.879419	112
absent myocardial trabeculae	0.0120882	0.837721	0.926345	24
decreased body mass index	-0.0267837	0.702388	0.859331	17
absent distortion product otoacoustic emissions	0.171025	0.00175391	0.0173194	28
increased urine phosphate level	0.0403019	0.615027	0.811814	13
abnormal thyroxine level	0.0329071	0.417183	0.676609	51
abnormal ovary size	-0.103694	3.76553e-05	0.000683174	134
delayed sexual maturation	-0.0872397	0.188317	0.44868	19
decreased pancreatic beta cell number	-0.0492346	0.234052	0.506403	49
abnormal cerebellar granule layer morphology	0.00451058	0.879707	0.946581	95
abnormal tumor vascularization	0.00743435	0.903998	0.958728	22
abnormal retinal blood vessel morphology	0.00250228	0.96912	0.988638	20
abnormal cilium physiology	-0.117871	0.0310421	0.139075	28
abnormal diaphragm morphology	0.0526696	0.113513	0.336412	76
abnormal circulating estradiol level	-0.12978	0.00637462	0.0466316	37
abnormal tympanic ring morphology	-0.0617813	0.182515	0.440813	39
increased erythropoietin level	-0.0254823	0.769874	0.891622	11
abnormal maternal decidual layer morphology	-0.081439	0.159079	0.406815	25
abnormal vestibular ganglion morphology	0.0234771	0.673158	0.844357	27
pericardial effusion	-0.033128	0.225965	0.495735	113
abnormal interferon-alpha secretion	-0.136645	0.0159795	0.0872861	26
abnormal cochlear ganglion morphology	0.040002	0.203945	0.471403	85
abnormal professional antigen presenting cell morphology	-0.0676037	4.9632e-10	3.10846e-08	786
increased monocyte cell number	-0.0775282	0.00825449	0.0564963	98
abnormal orientation of outer hair cell stereociliary bundles	0.118659	0.0443848	0.176075	24
abnormal aggression-related behavior	0.0393837	0.230645	0.501456	78
abnormal B cell morphology	-0.0925579	8.49904e-13	1.14287e-10	535
abnormal endocrine pancreas morphology	-0.0281647	0.179734	0.437099	194
prenatal growth retardation	-0.0340683	0.0111761	0.0695199	494
abnormal T cell selection	-0.095594	0.0367289	0.155198	40
abnormal parietal lobe morphology	0.0897488	0.084095	0.275023	31
increased glomerular capsule space	-0.13498	0.0367763	0.155255	20
decreased pulmonary ventilation	-0.0665644	0.444767	0.701619	11
abnormal liver vasculature morphology	-0.0562428	0.115049	0.33805	66
abnormal thoracic vertebrae morphology	-0.070437	0.0169516	0.0904871	97
increased total body fat amount	0.0116359	0.66396	0.839435	118
decreased circulating ketone body level	0.0971668	0.225318	0.495029	13
small thoracic cage	-0.0223777	0.7105	0.862918	23
decreased susceptibility to infection induced morbidity/mortality	-0.0941438	0.00937876	0.0612618	64
decreased eye pigmentation	-0.0187251	0.783423	0.897901	18
abnormal acrosome reaction	-0.0712803	0.200297	0.466272	27
thick interventricular septum	0.0285188	0.583071	0.798862	31
decreased cochlear nerve compound action potential	0.169673	0.0632625	0.223304	10
abnormal induced cell death	-0.0428716	0.0321993	0.143066	214
decreased skeletal muscle size	0.0731921	0.0684517	0.236376	52
kidney atrophy	-0.0703844	0.0742172	0.251753	54
skeletal muscle degeneration	0.216769	0.000590011	0.00709877	21
abnormal osteoblast morphology	-0.0135213	0.609265	0.80905	121
abnormal innervation	0.0612688	0.00335659	0.0283143	196
increased grip strength	-0.0114549	0.80236	0.905328	40
embryonic lethality at implantation	-0.0790464	0.18048	0.43798	24
decreased vasoconstriction	0.0922915	0.134312	0.372722	22
abnormal circulating parathyroid hormone level	0.0772647	0.199979	0.466243	23
abnormal single-positive T cell number	-0.071407	0.0144795	0.0823384	99
decreased response of heart to induced stress	-0.0497527	0.362685	0.631768	28
abnormal bone marrow cavity morphology	0.0654478	0.207785	0.474603	31
abnormal leukocyte tethering or rolling	-0.0195787	0.70184	0.858889	32
decreased cell migration	-0.0445025	0.307923	0.58001	44
increased urine glucose level	-0.0683056	0.278913	0.550807	21
centrally nucleated skeletal muscle fibers	0.163098	5.74777e-06	0.000140528	65
abnormal head development	0.00674994	0.873038	0.944354	47
decreased interleukin-17 secretion	-0.19522	0.00035469	0.00470041	28
abnormal submandibular gland morphology	-0.064481	0.246643	0.521578	27
abnormal metestrus	-0.125596	0.169177	0.42003	10
abnormal bronchus morphology	0.0371037	0.42935	0.688043	38
increased coping response	-0.0458013	0.478585	0.727038	20
abnormal eye anterior chamber morphology	0.000847693	0.986571	0.995197	33
abnormal erythroid progenitor cell morphology	-0.0828569	0.00475713	0.0374348	98
abnormal spermatocyte morphology	-0.0485829	0.230995	0.501476	51
abnormal anterior uvea morphology	0.0214028	0.414726	0.675303	123
hyperglycemia	-0.0125981	0.658488	0.837909	104
abnormal midbrain-hindbrain boundary development	-0.111058	0.224095	0.494241	10
abnormal adrenal gland morphology	-0.0594545	0.0547543	0.202702	88
abnormal optic tract morphology	0.0140355	0.86636	0.942646	12
decreased susceptibility to atherosclerosis	-0.101669	0.159364	0.407273	16
increased circulating interleukin-1 beta level	-0.0447186	0.405079	0.668256	29
abnormal interleukin-10 secretion	-0.0782965	0.0238995	0.114061	70
head tossing	0.193417	0.000316877	0.004299	29
abnormal testis physiology	-0.00531238	0.928281	0.969796	24
increased sarcoma incidence	-0.0683004	0.0141896	0.0813988	109
absent placental labyrinth	-0.0259319	0.681023	0.847941	21
abnormal hippocampus morphology	0.0385519	0.0282756	0.129535	280
abnormal neural plate morphology	0.0596925	0.274782	0.545342	28
abnormal stomach mucosa morphology	-0.0183672	0.57857	0.795794	77
dilated heart	0.0354706	0.08192	0.269476	206
abnormal interleukin-1 beta secretion	-0.0906485	0.0110875	0.069157	66
abnormal CD4-positive, alpha beta T cell number	-0.065931	7.77655e-05	0.00131197	312
enlarged thymus	-0.0945431	0.00602051	0.0446057	71
increased motor neuron number	0.0388978	0.627399	0.819095	13
abnormal mortality induced by ionizing radiation	-0.0475996	0.275471	0.546164	44
abnormal large intestine morphology	-0.0347132	0.13592	0.375262	157
lethality at weaning	0.012744	0.675506	0.845219	91
abnormal Cajal-Retzius cell morphology	0.102046	0.263969	0.536385	10
abnormal myogenesis	-0.0506588	0.190755	0.452352	56
hyporesponsive to tactile stimuli	0.0821056	0.0660474	0.229634	42
abnormal lactation	0.0199634	0.548603	0.776562	76
edema	0.00405711	0.787109	0.898577	389
hypertension	0.116274	0.00494958	0.0383551	49
increased renal glomerulus basement membrane thickness	0.0469216	0.382336	0.650312	29
abnormal pup retrieval	0.102501	0.15598	0.403131	16
stomach mucosa hyperplasia	0.0879883	0.291441	0.56275	12
abnormal hippocampus pyramidal cell morphology	0.0341859	0.373092	0.642079	57
extramedullary hematopoiesis	-0.039809	0.120432	0.34849	129
abnormal uterus morphology	-0.0607595	0.00843088	0.0571899	160
abnormal heart electrocardiography waveform feature	-0.0121612	0.648422	0.830205	119
abnormal CNS glial cell morphology	0.00353417	0.848144	0.931695	253
abnormal hippocampus granule cell layer	0.0884816	0.269538	0.541967	13
abnormal startle reflex	0.100722	5.46255e-07	1.69896e-05	212
abnormal suckling behavior	0.0520156	0.0642089	0.225471	107
abnormal sympathetic nervous system physiology	0.0954818	0.0987398	0.30731	25
abnormal vasodilation	0.0752606	0.0266397	0.123777	73
[truncated: 2,573 more rows]

## Sheet: gTex tissue
	stat	pval	p.adj	num.genes
Adipose	0.0391332	0.345034	0.39615	49
Adrenal	0.0276164	0.316751	0.392771	112
Artery	0.0647187	0.0539747	0.0836608	75
Bladder	0.0599297	0.0743516	0.109757	75
Brain	0.060445	1.30801e-07	6.75806e-07	744
Breast	0.0910125	0.0373369	0.0643024	44
Lymphocyte	-0.111918	3.52898e-20	3.64661e-19	645
Cervix	0.0739746	0.241288	0.325214	21
Colon	0.0409555	0.0526319	0.0836608	194
Esophagus	0.10187	3.22292e-09	1.99821e-08	299
Fallopian Tube	-0.0221206	0.702341	0.725752	25
Heart	0.05824	0.00677814	0.0161633	187
Kidney	0.0607902	0.00262805	0.00678912	213
Liver	0.0638771	2.27011e-06	8.79666e-06	507
Lung	0.0300146	0.294014	0.379768	104
Salivary Gland	0.0653876	0.00800311	0.0177212	141
Muscle	0.0835438	5.82868e-07	2.58127e-06	318
Nerve	-0.012417	0.68918	0.725752	88
Ovary	0.0237718	0.522669	0.578669	61
Pancreas	0.0425818	0.0359347	0.0643024	211
Pituitary	0.0203154	0.33641	0.39615	194
Prostate	0.134295	0.000243254	0.000837874	63
Skin	0.163645	5.22734e-21	8.10238e-20	292
Small Intestine	0.0426782	0.0209239	0.0432428	257
Spleen	-0.0524816	0.00236421	0.00666276	297
Stomach	0.0882171	0.000641612	0.001989	128
Testis	-0.143866	3.01484e-53	9.34601e-52	1263
Thyroid	0.0463775	0.154013	0.217019	80
Uterus	0.0124533	0.843621	0.843621	21
Vagina	0.13802	1.10454e-09	8.56019e-09	168
Blood	-0.0259852	0.0290903	0.0563625	678
