# Supplementary material for: Complementary evolution of coding and noncoding sequence underlies mammalian hairlessness
Source: eLife. 2022 Nov 7;11:e76911. doi: 10.7554/eLife.76911 (PMC9803358; doi:10.7554/eLife.76911)
Supplement: Figure 1—source data 9. — Number of genes annotated and number of annotated genes shared for MGI and tissue expression enrichment results in Figure 1C and D. [file elife-76911-fig1-data9.xlsx]

## Sheet: MGI pathway nodes
	path	weight
greasy coat	greasy coat	16
abnormal hair cuticle	abnormal hair cuticle	11
decreased skin tensile strength	decreased skin tensile strength	23
blistering	blistering	31
rough coat	rough coat	22
abnormal hair texture	abnormal hair texture	51
abnormal hair shaft morphology	abnormal hair shaft morphology	72
impaired skin barrier function	impaired skin barrier function	72
abnormal epidermis stratum granulosum morphology	abnormal epidermis stratum granulosum morphology	61
disheveled coat	disheveled coat	45
abnormal vibrissa morphology	abnormal vibrissa morphology	88

## Sheet: MGI pathway edges
path1	path2	weight
greasy coat	abnormal hair cuticle	1
greasy coat	decreased skin tensile strength	2
greasy coat	blistering	1
greasy coat	rough coat	4
greasy coat	abnormal hair texture	7
greasy coat	abnormal hair shaft morphology	4
greasy coat	impaired skin barrier function	2
greasy coat	abnormal epidermis stratum granulosum morphology	4
greasy coat	disheveled coat	5
greasy coat	abnormal vibrissa morphology	4
abnormal hair cuticle	decreased skin tensile strength	0
abnormal hair cuticle	blistering	0
abnormal hair cuticle	rough coat	2
abnormal hair cuticle	abnormal hair texture	10
abnormal hair cuticle	abnormal hair shaft morphology	11
abnormal hair cuticle	impaired skin barrier function	4
abnormal hair cuticle	abnormal epidermis stratum granulosum morphology	3
abnormal hair cuticle	disheveled coat	1
abnormal hair cuticle	abnormal vibrissa morphology	7
decreased skin tensile strength	blistering	6
decreased skin tensile strength	rough coat	1
decreased skin tensile strength	abnormal hair texture	3
decreased skin tensile strength	abnormal hair shaft morphology	4
decreased skin tensile strength	impaired skin barrier function	5
decreased skin tensile strength	abnormal epidermis stratum granulosum morphology	4
decreased skin tensile strength	disheveled coat	0
decreased skin tensile strength	abnormal vibrissa morphology	4
blistering	rough coat	0
blistering	abnormal hair texture	0
blistering	abnormal hair shaft morphology	4
blistering	impaired skin barrier function	7
blistering	abnormal epidermis stratum granulosum morphology	6
blistering	disheveled coat	0
blistering	abnormal vibrissa morphology	3
rough coat	abnormal hair texture	22
rough coat	abnormal hair shaft morphology	9
rough coat	impaired skin barrier function	1
rough coat	abnormal epidermis stratum granulosum morphology	3
rough coat	disheveled coat	3
rough coat	abnormal vibrissa morphology	8
abnormal hair texture	abnormal hair shaft morphology	25
abnormal hair texture	impaired skin barrier function	6
abnormal hair texture	abnormal epidermis stratum granulosum morphology	6
abnormal hair texture	disheveled coat	9
abnormal hair texture	abnormal vibrissa morphology	21
abnormal hair shaft morphology	impaired skin barrier function	11
abnormal hair shaft morphology	abnormal epidermis stratum granulosum morphology	17
abnormal hair shaft morphology	disheveled coat	7
abnormal hair shaft morphology	abnormal vibrissa morphology	30
impaired skin barrier function	abnormal epidermis stratum granulosum morphology	30
impaired skin barrier function	disheveled coat	3
impaired skin barrier function	abnormal vibrissa morphology	11
abnormal epidermis stratum granulosum morphology	disheveled coat	2
abnormal epidermis stratum granulosum morphology	abnormal vibrissa morphology	15
disheveled coat	abnormal vibrissa morphology	7

## Sheet: Tissue pathway nodes
	path	weight
Adipose	Adipose	49
Adrenal	Adrenal	112
Artery	Artery	75
Bladder	Bladder	76
Brain	Brain	745
Breast	Breast	47
Lymphocyte	Lymphocyte	645
Cervix	Cervix	21
Colon	Colon	195
Esophagus	Esophagus	314
Fallopian Tube	Fallopian Tube	25
Heart	Heart	187
Kidney	Kidney	213
Liver	Liver	507
Lung	Lung	105
Salivary Gland	Salivary Gland	147
Muscle	Muscle	318
Nerve	Nerve	88
Ovary	Ovary	61
Pancreas	Pancreas	211
Pituitary	Pituitary	195
Prostate	Prostate	66
Skin	Skin	310
Small Intestine	Small Intestine	258
Spleen	Spleen	297
Stomach	Stomach	128
Testis	Testis	1265
Thyroid	Thyroid	81
Uterus	Uterus	21
Vagina	Vagina	178
Blood	Blood	680
Hair Follicle	Hair Follicle	69

## Sheet: Tissue pathway edges
path1	path2	weight
Adipose	Adrenal	0
Adipose	Artery	3
Adipose	Bladder	1
Adipose	Brain	1
Adipose	Breast	27
Adipose	Lymphocyte	3
Adipose	Cervix	1
Adipose	Colon	1
Adipose	Esophagus	4
Adipose	Fallopian Tube	5
Adipose	Heart	4
Adipose	Kidney	3
Adipose	Liver	8
Adipose	Lung	6
Adipose	Salivary Gland	4
Adipose	Muscle	3
Adipose	Nerve	3
Adipose	Ovary	1
Adipose	Pancreas	0
Adipose	Pituitary	2
Adipose	Prostate	1
Adipose	Skin	3
Adipose	Small Intestine	1
Adipose	Spleen	1
Adipose	Stomach	1
Adipose	Testis	2
Adipose	Thyroid	1
Adipose	Uterus	1
Adipose	Vagina	2
Adipose	Blood	3
Adipose	Hair Follicle	0
Adrenal	Artery	1
Adrenal	Bladder	2
Adrenal	Brain	13
Adrenal	Breast	0
Adrenal	Lymphocyte	3
Adrenal	Cervix	1
Adrenal	Colon	2
Adrenal	Esophagus	3
Adrenal	Fallopian Tube	1
Adrenal	Heart	5
Adrenal	Kidney	3
Adrenal	Liver	13
Adrenal	Lung	1
Adrenal	Salivary Gland	3
Adrenal	Muscle	5
Adrenal	Nerve	1
Adrenal	Ovary	10
Adrenal	Pancreas	7
Adrenal	Pituitary	7
Adrenal	Prostate	1
Adrenal	Skin	5
Adrenal	Small Intestine	3
Adrenal	Spleen	6
Adrenal	Stomach	4
Adrenal	Testis	11
Adrenal	Thyroid	0
Adrenal	Uterus	1
Adrenal	Vagina	4
Adrenal	Blood	2
Adrenal	Hair Follicle	1
Artery	Bladder	8
Artery	Brain	3
Artery	Breast	2
Artery	Lymphocyte	7
Artery	Cervix	3
Artery	Colon	12
Artery	Esophagus	12
Artery	Fallopian Tube	5
Artery	Heart	11
Artery	Kidney	2
Artery	Liver	3
Artery	Lung	2
Artery	Salivary Gland	1
Artery	Muscle	6
Artery	Nerve	3
Artery	Ovary	3
Artery	Pancreas	2
Artery	Pituitary	0
Artery	Prostate	4
Artery	Skin	2
Artery	Small Intestine	0
Artery	Spleen	0
Artery	Stomach	1
Artery	Testis	2
Artery	Thyroid	3
Artery	Uterus	8
Artery	Vagina	1
Artery	Blood	0
Artery	Hair Follicle	0
Bladder	Brain	1
Bladder	Breast	6
Bladder	Lymphocyte	4
Bladder	Cervix	3
Bladder	Colon	32
Bladder	Esophagus	47
Bladder	Fallopian Tube	4
Bladder	Heart	9
Bladder	Kidney	12
Bladder	Liver	7
Bladder	Lung	8
Bladder	Salivary Gland	28
Bladder	Muscle	7
Bladder	Nerve	1
Bladder	Ovary	1
Bladder	Pancreas	13
Bladder	Pituitary	2
Bladder	Prostate	19
Bladder	Skin	26
Bladder	Small Intestine	20
Bladder	Spleen	1
Bladder	Stomach	20
Bladder	Testis	0
Bladder	Thyroid	4
Bladder	Uterus	5
Bladder	Vagina	29
Bladder	Blood	2
Bladder	Hair Follicle	5
Brain	Breast	1
Brain	Lymphocyte	12
Brain	Cervix	2
Brain	Colon	3
Brain	Esophagus	8
Brain	Fallopian Tube	0
Brain	Heart	11
Brain	Kidney	16
Brain	Liver	16
Brain	Lung	6
Brain	Salivary Gland	3
Brain	Muscle	13
Brain	Nerve	19
Brain	Ovary	7
Brain	Pancreas	13
Brain	Pituitary	94
Brain	Prostate	7
Brain	Skin	8
Brain	Small Intestine	8
Brain	Spleen	6
Brain	Stomach	4
Brain	Testis	34
Brain	Thyroid	7
Brain	Uterus	1
Brain	Vagina	2
Brain	Blood	13
Brain	Hair Follicle	3
Breast	Lymphocyte	0
Breast	Cervix	1
Breast	Colon	6
Breast	Esophagus	13
Breast	Fallopian Tube	1
Breast	Heart	5
Breast	Kidney	9
Breast	Liver	8
Breast	Lung	4
Breast	Salivary Gland	17
Breast	Muscle	2
Breast	Nerve	3
Breast	Ovary	1
Breast	Pancreas	5
Breast	Pituitary	3
Breast	Prostate	13
Breast	Skin	15
Breast	Small Intestine	5
Breast	Spleen	0
Breast	Stomach	2
Breast	Testis	0
Breast	Thyroid	5
Breast	Uterus	1
Breast	Vagina	13
Breast	Blood	2
Breast	Hair Follicle	2
Lymphocyte	Cervix	1
Lymphocyte	Colon	10
Lymphocyte	Esophagus	13
Lymphocyte	Fallopian Tube	1
Lymphocyte	Heart	2
Lymphocyte	Kidney	13
Lymphocyte	Liver	14
Lymphocyte	Lung	14
Lymphocyte	Salivary Gland	9
Lymphocyte	Muscle	5
Lymphocyte	Nerve	2
Lymphocyte	Ovary	4
Lymphocyte	Pancreas	8
Lymphocyte	Pituitary	3
Lymphocyte	Prostate	1
Lymphocyte	Skin	6
Lymphocyte	Small Intestine	20
Lymphocyte	Spleen	125
Lymphocyte	Stomach	9
Lymphocyte	Testis	71
Lymphocyte	Thyroid	1
Lymphocyte	Uterus	1
Lymphocyte	Vagina	4
Lymphocyte	Blood	142
Lymphocyte	Hair Follicle	1
Cervix	Colon	6
Cervix	Esophagus	3
Cervix	Fallopian Tube	6
Cervix	Heart	1
Cervix	Kidney	3
Cervix	Liver	0
Cervix	Lung	0
Cervix	Salivary Gland	1
Cervix	Muscle	0
Cervix	Nerve	1
Cervix	Ovary	2
Cervix	Pancreas	0
Cervix	Pituitary	0
Cervix	Prostate	7
Cervix	Skin	1
Cervix	Small Intestine	0
Cervix	Spleen	1
Cervix	Stomach	1
Cervix	Testis	2
Cervix	Thyroid	0
Cervix	Uterus	10
Cervix	Vagina	9
Cervix	Blood	0
Cervix	Hair Follicle	0
Colon	Esophagus	48
Colon	Fallopian Tube	4
Colon	Heart	11
Colon	Kidney	40
Colon	Liver	37
Colon	Lung	11
Colon	Salivary Gland	38
Colon	Muscle	7
Colon	Nerve	1
Colon	Ovary	2
Colon	Pancreas	26
Colon	Pituitary	6
Colon	Prostate	22
Colon	Skin	16
Colon	Small Intestine	129
Colon	Spleen	6
Colon	Stomach	42
Colon	Testis	4
Colon	Thyroid	8
Colon	Uterus	8
Colon	Vagina	26
Colon	Blood	8
Colon	Hair Follicle	1
Esophagus	Fallopian Tube	4
Esophagus	Heart	9
Esophagus	Kidney	17
Esophagus	Liver	9
Esophagus	Lung	17
Esophagus	Salivary Gland	57
Esophagus	Muscle	10
Esophagus	Nerve	2
Esophagus	Ovary	3
Esophagus	Pancreas	15
Esophagus	Pituitary	4
Esophagus	Prostate	27
Esophagus	Skin	143
Esophagus	Small Intestine	27
Esophagus	Spleen	4
Esophagus	Stomach	25
Esophagus	Testis	13
Esophagus	Thyroid	8
Esophagus	Uterus	6
Esophagus	Vagina	165
Esophagus	Blood	15
Esophagus	Hair Follicle	22
Fallopian Tube	Heart	2
Fallopian Tube	Kidney	2
Fallopian Tube	Liver	2
Fallopian Tube	Lung	1
Fallopian Tube	Salivary Gland	4
Fallopian Tube	Muscle	2
Fallopian Tube	Nerve	1
Fallopian Tube	Ovary	5
Fallopian Tube	Pancreas	2
Fallopian Tube	Pituitary	3
Fallopian Tube	Prostate	4
Fallopian Tube	Skin	1
Fallopian Tube	Small Intestine	0
Fallopian Tube	Spleen	1
Fallopian Tube	Stomach	0
Fallopian Tube	Testis	4
Fallopian Tube	Thyroid	1
Fallopian Tube	Uterus	9
Fallopian Tube	Vagina	4
Fallopian Tube	Blood	0
Fallopian Tube	Hair Follicle	0
Heart	Kidney	2
Heart	Liver	13
Heart	Lung	3
Heart	Salivary Gland	2
Heart	Muscle	85
Heart	Nerve	2
Heart	Ovary	6
Heart	Pancreas	5
Heart	Pituitary	3
Heart	Prostate	5
Heart	Skin	4
Heart	Small Intestine	0
Heart	Spleen	4
Heart	Stomach	5
Heart	Testis	12
Heart	Thyroid	2
Heart	Uterus	3
Heart	Vagina	2
Heart	Blood	3
Heart	Hair Follicle	0
Kidney	Liver	75
Kidney	Lung	12
Kidney	Salivary Gland	27
Kidney	Muscle	5
Kidney	Nerve	2
Kidney	Ovary	4
Kidney	Pancreas	41
Kidney	Pituitary	7
Kidney	Prostate	13
Kidney	Skin	16
Kidney	Small Intestine	58
Kidney	Spleen	6
Kidney	Stomach	19
Kidney	Testis	8
Kidney	Thyroid	16
Kidney	Uterus	3
Kidney	Vagina	18
Kidney	Blood	5
Kidney	Hair Follicle	3
Liver	Lung	8
Liver	Salivary Gland	12
Liver	Muscle	10
Liver	Nerve	2
Liver	Ovary	3
Liver	Pancreas	47
Liver	Pituitary	4
Liver	Prostate	9
Liver	Skin	8
Liver	Small Intestine	65
Liver	Spleen	11
Liver	Stomach	22
Liver	Testis	11
Liver	Thyroid	7
Liver	Uterus	0
Liver	Vagina	7
Liver	Blood	22
Liver	Hair Follicle	1
Lung	Salivary Gland	15
Lung	Muscle	2
Lung	Nerve	3
Lung	Ovary	0
Lung	Pancreas	9
Lung	Pituitary	4
Lung	Prostate	8
Lung	Skin	8
Lung	Small Intestine	15
Lung	Spleen	21
Lung	Stomach	12
Lung	Testis	0
Lung	Thyroid	8
Lung	Uterus	0
Lung	Vagina	11
Lung	Blood	23
Lung	Hair Follicle	2
Salivary Gland	Muscle	1
Salivary Gland	Nerve	0
Salivary Gland	Ovary	1
Salivary Gland	Pancreas	25
Salivary Gland	Pituitary	8
Salivary Gland	Prostate	27
Salivary Gland	Skin	45
Salivary Gland	Small Intestine	40
Salivary Gland	Spleen	5
Salivary Gland	Stomach	29
Salivary Gland	Testis	1
Salivary Gland	Thyroid	12
Salivary Gland	Uterus	0
Salivary Gland	Vagina	51
Salivary Gland	Blood	7
Salivary Gland	Hair Follicle	8
Muscle	Nerve	2
Muscle	Ovary	1
Muscle	Pancreas	8
Muscle	Pituitary	2
Muscle	Prostate	3
Muscle	Skin	4
Muscle	Small Intestine	1
Muscle	Spleen	2
Muscle	Stomach	3
Muscle	Testis	12
Muscle	Thyroid	3
Muscle	Uterus	3
Muscle	Vagina	2
Muscle	Blood	3
Muscle	Hair Follicle	1
Nerve	Ovary	4
Nerve	Pancreas	2
Nerve	Pituitary	2
Nerve	Prostate	0
Nerve	Skin	3
Nerve	Small Intestine	0
Nerve	Spleen	3
Nerve	Stomach	1
Nerve	Testis	5
Nerve	Thyroid	1
Nerve	Uterus	1
Nerve	Vagina	1
Nerve	Blood	2
Nerve	Hair Follicle	0
Ovary	Pancreas	5
Ovary	Pituitary	6
Ovary	Prostate	1
Ovary	Skin	1
Ovary	Small Intestine	2
Ovary	Spleen	6
Ovary	Stomach	3
Ovary	Testis	8
Ovary	Thyroid	0
Ovary	Uterus	3
Ovary	Vagina	3
Ovary	Blood	2
Ovary	Hair Follicle	0
Pancreas	Pituitary	11
Pancreas	Prostate	11
Pancreas	Skin	11
Pancreas	Small Intestine	41
Pancreas	Spleen	2
Pancreas	Stomach	34
Pancreas	Testis	11
Pancreas	Thyroid	6
Pancreas	Uterus	0
Pancreas	Vagina	12
Pancreas	Blood	0
Pancreas	Hair Follicle	1
Pituitary	Prostate	2
Pituitary	Skin	3
Pituitary	Small Intestine	7
Pituitary	Spleen	3
Pituitary	Stomach	5
Pituitary	Testis	24
Pituitary	Thyroid	4
Pituitary	Uterus	0
Pituitary	Vagina	3
Pituitary	Blood	2
Pituitary	Hair Follicle	0
Prostate	Skin	20
Prostate	Small Intestine	12
Prostate	Spleen	2
Prostate	Stomach	13
Prostate	Testis	0
Prostate	Thyroid	8
Prostate	Uterus	5
Prostate	Vagina	26
Prostate	Blood	0
Prostate	Hair Follicle	4
Skin	Small Intestine	15
Skin	Spleen	4
Skin	Stomach	12
Skin	Testis	6
Skin	Thyroid	8
Skin	Uterus	0
Skin	Vagina	122
Skin	Blood	10
Skin	Hair Follicle	28
Small Intestine	Spleen	25
Small Intestine	Stomach	49
Small Intestine	Testis	6
Small Intestine	Thyroid	7
Small Intestine	Uterus	0
Small Intestine	Vagina	20
Small Intestine	Blood	28
Small Intestine	Hair Follicle	1
Spleen	Stomach	5
Spleen	Testis	7
Spleen	Thyroid	3
Spleen	Uterus	1
Spleen	Vagina	4
Spleen	Blood	217
Spleen	Hair Follicle	0
Stomach	Testis	7
Stomach	Thyroid	6
Stomach	Uterus	0
Stomach	Vagina	16
Stomach	Blood	3
Stomach	Hair Follicle	0
Testis	Thyroid	4
Testis	Uterus	2
Testis	Vagina	4
Testis	Blood	27
Testis	Hair Follicle	0
Thyroid	Uterus	0
Thyroid	Vagina	8
Thyroid	Blood	1
Thyroid	Hair Follicle	0
Uterus	Vagina	6
Uterus	Blood	0
Uterus	Hair Follicle	0
Vagina	Blood	8
Vagina	Hair Follicle	21
Blood	Hair Follicle	0
