# Supplementary material for: Complementary evolution of coding and noncoding sequence underlies mammalian hairlessness
Source: eLife. 2022 Nov 7;11:e76911. doi: 10.7554/eLife.76911 (PMC9803358; doi:10.7554/eLife.76911)
Supplement: Figure 3—source data 1. — Species-specific analysis results shown in Figure 2 and its supplement. Included are Wilcoxon signed-rank test results per species per gene, hair enrichment per species, hair enrichment per minimum species cutoff, and total number of genes with significant shifts per species. [file elife-76911-fig3-data1.xlsx]

## Sheet: WilcoxpPerGenePerSpecies
	odoRosDi	orcOrc1	turTru2	susScr3	cerSim1	loxAfr3	triMan1	dasNov3	hetGla2	hg19
CEP290	0.27073	2.12944e-05	0.00929153	0.00339827	1.21435e-07	5.3011e-10	0.988782	0.000110384	0.155584	2.59488e-07
DNAH5	0.173361	0.0109158	1.55606e-06	0.0827643	5.39258e-06	0.0305494	0.0486499	0.0272145	0.0291755	0.902152
DNAH6	1.26099e-05	0.725876	1.95168e-06	1.02278e-05	0.0612798	2.81114e-09	2.81114e-09	3.48153e-07	7.30698e-05	5.02313e-08
DNAH7	0.0019437	2.54824e-08	0.00355358	5.45859e-05	0.250663	8.79719e-10	7.79049e-10	0.0805951	2.29555e-09	4.44909e-07
DNAH9	7.1634e-06	0.0205153	0.349084	0.00103032	6.64579e-07	0.000589136	1.54202e-08	7.79049e-10	5.97173e-06	0.411915
Em:AC008101.5	0.158359	0.00266747	NA	0.431685	NA	0.0341392	5.26197e-08	6.2224e-08	0.0341392	NA
PKHD1	3.83227e-07	0.0358042	5.80245e-05	1.37654e-07	0.000138269	4.09008e-08	3.60788e-10	0.0124246	4.2983e-10	0.00211504
TTN	7.54418e-09	0.000166076	0.3795	3.60788e-10	1.59682e-07	1.07846e-06	4.05493e-10	0.002775	0.491722	0.217208
A1BG	0.0014727	0.646437	0.957828	0.000703334	0.104543	0.436769	1.33342e-06	0.00515984	0.00291552	0.00354228
AADACL3	5.92034e-07	0.0312674	7.28181e-05	0.0558262	0.225067	0.028519	2.87155e-06	5.68434e-13	4.80601e-05	0.505917
AAR2	0.00382412	NA	NA	0.536938	1.63118e-09	4.78405e-05	2.84217e-14	1.48453e-05	7.59006e-08	0.000107877
AB209621	1.49012e-08	0.131469	NA	NA	0.0774157	0.00243979	2.28733e-06	0.03793	0.00953641	0.00243979
ABHD5	7.31791e-09	NA	NA	0.0809945	2.27374e-13	0.0010334	7.95808e-13	0.0303276	0.00730908	0.894311
ABCA3	0.011752	2.35635e-05	0.568987	5.48592e-08	0.000209846	4.92208e-08	0.00593802	1.34223e-09	4.67942e-07	0.517781
ABLIM2	0.00106628	NA	0.0899296	9.79981e-10	6.70009e-08	9.87722e-07	1.62206e-06	2.27374e-13	0.514273	NA
ABCB4	0.000118474	0.0598911	NA	3.52518e-05	1.16063e-07	0.0133297	0.000666756	0.067639	1.94689e-12	9.9476e-13
ACAA1	7.28181e-05	2.87155e-06	NA	2.00517e-05	4.52388e-05	4.52388e-05	5.41948e-05	0.00321036	1.78701e-08	NA
ACADS	2.86718e-10	NA	NA	4.10137e-05	0.00930274	1.30196e-08	3.83216e-09	4.95054e-07	0.0273726	0.00799462
ABCC1	4.66165e-08	0.0741225	1.10045e-07	7.79049e-10	8.79719e-10	0.0313437	2.03879e-09	0.00793903	0.00170503	NA
ACBD5	NA	NA	0.000307169	8.15328e-05	2.40862e-06	0.185831	2.29531e-08	0.00245303	4.9738e-14	NA
ABCD1	1.08509e-06	0.0287412	2.84217e-14	0.00205349	1.14836e-08	1.98952e-13	0.356447	2.84217e-14	2.1555e-10	NA
ABCG4	NA	NA	NA	0.000273291	0.00152122	0.738275	0.155497	0.365108	0.0675851	NA
ABHD15	0.398385	NA	NA	0.00740309	4.52967e-07	5.40012e-10	0.143559	7.65439e-07	6.28688e-10	NA
ADAT3	0.302718	1.09209e-05	0.000172431	0.00347104	0.0504177	0.000273291	1.0688e-06	NA	8.19723e-07	NA
ACER3	0.000116755	NA	0.846193	0.00948097	1.83436e-06	0.62468	0.680739	0.0320954	2.03727e-09	0.0667966
ACOT13	4.063e-07	NA	NA	0.0278254	2.60134e-07	1.20053e-10	3.63798e-12	0.0334361	3.63798e-12	NA
ACOXL	0.305599	0.955433	0.00652465	0.0096116	0.000670167	6.70074e-07	8.08399e-10	1.77636e-13	0.811241	0.0315954
ADCY2	0.0788437	0.0054029	0.561766	0.476319	0.000333792	5.44762e-08	5.40012e-10	1.73259e-10	0.000457517	NA
ACSM1	2.72848e-12	0.448582	0.83749	9.09495e-13	6.53754e-08	0.111585	0.0104413	0.672121	0.797639	8.56228e-07
ACRV1	0.00213058	0.522044	NA	0.277551	1.30467e-09	7.50333e-12	3.56894e-06	0.569879	0.261802	7.42157e-08
ADD1	0.000948836	0.0270156	NA	1.50061e-08	0.828307	0.000636345	0.00568079	1.44517e-09	0.664338	1.12202e-10
ADH7	NA	NA	NA	0.00155083	2.64116e-05	7.31436e-05	1.01863e-10	0.00013128	NA	NA
ACTA2	NA	NA	NA	NA	NA	NA	NA	NA	NA	NA
ACTL7B	0.000543514	0.000113677	7.00823e-10	5.55698e-09	0.0214002	3.40414e-05	3.89377e-12	0.00181895	0.0195372	1.39182e-07
ACTR2	NA	NA	NA	NA	NA	NA	NA	NA	NA	NA
ACVR1B	0.103749	NA	0.00268114	0.00119583	3.63798e-10	6.27188e-08	6.25732e-10	0.000121229	0.338376	NA
ADM5	1.49012e-07	0.499195	0.366609	0.291376	0.000745445	0.0236109	5.96046e-08	0.452473	NA	0.72654
ADPRHL1	1.61863e-08	NA	0.664827	3.84447e-05	1.0688e-06	0.00627903	0.051955	0.208958	0.427498	NA
ADAD1	0.000159592	0.00086202	0.391877	0.421705	0.00744028	1.25056e-12	0.00769412	0.000559891	1.42109e-14	NA
ADAM1A	3.55271e-13	7.10543e-14	1.42109e-13	6.01711e-06	6.44519e-10	9.9476e-14	7.10543e-14	0.132484	0.196782	0.00285026
ADRB1	NA	NA	1.86265e-09	0.209397	NA	5.96046e-07	0.000131131	NA	0.336908	6.2664e-05
AEBP1	0.785983	7.59109e-07	8.62201e-10	6.14923e-08	0.00193428	0.234157	0.288691	5.14956e-09	0.000179099	2.73247e-08
ADAM30	0.232642	1.01453e-05	2.93912e-06	0.413133	0.00469257	5.12991e-08	4.11092e-10	0.00681126	NA	6.36646e-12
ADAMTS3	3.0898e-11	0.0731874	2.76005e-07	0.650059	0.00043851	0.0206266	3.21165e-12	0.000877004	6.80735e-11	0.000120996
ADAMTS13	0.000370141	0.0230075	0.142004	0.635905	NA	3.61741e-10	0.00269286	7.10543e-15	0.0332657	1.42751e-07
ADAMTSL4	0.000474974	0.77952	4.13135e-09	0.00511896	2.25731e-05	7.57892e-08	0.0336935	0.0162316	1.10045e-07	0.158723
AFF1	3.50294e-08	0.698724	3.16187e-07	4.88057e-09	0.0811635	1.69921e-09	3.60788e-10	9.70836e-08	0.0496996	0.0400135
AGAP1	2.93775e-05	NA	NA	0.986175	0.000189048	0.000108851	0.00148574	1.13687e-13	1.1378e-06	4.56224e-08
AKAP11	0.837646	0.00321821	0.952797	3.60788e-10	0.000123755	9.17548e-05	3.60788e-10	0.0010606	3.60788e-10	9.83219e-07
AKAP7	1.77636e-13	6.70074e-07	0.906974	0.000759297	2.29531e-08	0.00434659	5.15726e-05	1.24536e-06	1.42109e-14	NA
AGO3	NA	NA	NA	0.903198	NA	NA	0.0134277	NA	NA	NA
AGER	7.26313e-05	NA	NA	0.176548	0.0158079	0.0666357	7.79049e-10	1.81873e-05	6.80736e-08	0.00377972
AKR1B10	NA	NA	NA	NA	2.27374e-13	NA	NA	0.000216115	1.59162e-12	2.27374e-13
AGPHD1	0.200501	0.196782	1.42109e-14	0.709703	0.725389	0.336119	0.386066	0.249093	0.019778	0.0160356
AGTRAP	0.000628877	0.614255	0.0299666	0.24695	3.3473e-06	0.402688	0.127497	1.35515e-08	0.604566	NA
AKR7L	NA	0.45429	4.3201e-12	0.000102781	1.02916e-08	0.00135036	0.050491	0.0876194	0.000621568	2.27374e-13
AL833346	1.04504e-05	NA	NA	0.146055	0.0902681	0.621944	1.1744e-06	0.00232549	1.02445e-07	0.00034511
AHI1	0.166792	1.72553e-05	0.649388	1.15362e-07	2.01892e-07	0.711195	6.73151e-09	0.0540735	6.1454e-05	9.58408e-10
AIDA	NA	NA	NA	0.0150644	NA	0.785742	NA	0.000919938	4.74602e-05	NA
ALDH3B1	5.40012e-13	NA	NA	0.0511935	0.00260543	0.939629	0.0255835	1.40344e-08	1.45062e-09	1.81899e-11
ALDH1A2	0.274626	NA	NA	0.536151	0.454879	5.52461e-06	0.798276	0.175744	0.0190441	6.47828e-06
AIMP2	2.7285e-05	NA	5.41833e-07	8.08811e-11	0.00793742	2.42103e-07	6.66493e-05	6.36415e-08	0.0299503	2.07365e-05
AK055272	0.877899	NA	0.967753	NA	4.08193e-06	0.789553	0.00096026	NA	0.000329717	NA
AK092965	0.289921	NA	9.61954e-05	0.0176615	NA	2.21189e-06	0.00290059	0.00034511	NA	NA
AK096995	0.37773	0.000981516	NA	0.608314	0.491946	0.00359718	0.930735	0.000237036	NA	NA
ALDOC	0.000402217	0.0972345	NA	3.19463e-06	1.27329e-10	0.23705	1.30443e-07	3.54559e-05	0.397424	NA
ALG3	0.00759387	2.56932e-11	NA	3.22797e-09	3.14551e-06	0.467767	5.68434e-14	0.0628693	5.40012e-13	1.1678e-06
AK124121	NA	0.0124512	0.120544	6.10352e-05	NA	NA	NA	NA	NA	NA
AK125726	2.6757e-05	0.329404	0.840555	0.0574068	5.68434e-14	5.68434e-14	5.68434e-14	0.0413775	2.5762e-09	NA
ALKBH6	9.73444e-13	0.0268758	NA	0.424167	0.00434659	7.49423e-08	1.62713e-06	0.460569	0.0442415	0.320356
AK128777	NA	NA	NA	NA	NA	NA	NA	NA	0.00805664	0.00244141
ALOX15P1	NA	NA	NA	NA	9.53674e-06	0.0101252	0.000104904	NA	NA	0.27221
AK299452	1.52588e-05	0.817581	0.00209045	NA	0.00556946	NA	NA	NA	0.0149994	1.52588e-05
AK310493	0.075938	NA	NA	0.216655	0.151659	NA	NA	0.000286535	0.000414196	0.0220975
ANKRD54	0.0146776	NA	0.102891	0.000181489	0.124716	0.0141081	4.29927e-07	0.00010101	0.23705	NA
ALPPL2	NA	NA	NA	0.75704	0.000555883	1.51031e-06	0.14475	0.0011364	0.0504177	4.54747e-13
ALYREF	NA	NA	0.118896	NA	NA	0.295776	0.00671387	NA	0.104004	0.625732
ANKS1A	2.40862e-06	0.842918	7.23091e-10	1.85656e-06	1.0338e-07	2.812e-07	0.000268286	2.18137e-12	2.35218e-09	5.76904e-10
AMER1	0.635905	0.00734124	4.85293e-06	0.00119746	3.93411e-07	4.85293e-06	1.32339e-11	0.851431	0.0071127	0.00134264
AMMECR1L	NA	NA	NA	NA	1	2.98023e-08	0.000282288	NA	5.16474e-05	NA
ANO2	2.09801e-05	1.78286e-08	9.05014e-08	NA	0.671523	3.85386e-09	2.27374e-12	9.92095e-11	4.61604e-11	1.50365e-06
ANP32B	0.652813	NA	5.96046e-08	0.366609	NA	0.0668832	NA	0.0189773	4.17233e-07	0.0163332
AOC2	0.641538	NA	NA	0.0234126	2.84217e-14	0.00708307	2.40038e-05	2.22538e-06	9.37916e-13	4.79105e-10
ANXA2R	NA	NA	NA	0.0637226	0.927279	0.498009	0.132727	NA	NA	1.90735e-06
AMPH	0.000636345	0.242851	0.159104	0.495838	9.57368e-10	1.78535e-05	0.156153	1.06237e-09	5.65856e-08	3.55271e-14
ANAPC13	NA	NA	0.00012207	NA	NA	0.00012207	NA	0.760864	0.6698	NA
AP1S1	NA	NA	NA	NA	NA	NA	NA	NA	NA	NA
AP3D1	5.95642e-07	0.190928	0.968551	0.483396	0.0164907	NA	NA	NA	1.95323e-09	NA
ANG	0.0259408	0.473722	0.00188957	0.00117778	0.501889	0.0781624	0.43312	5.33175e-07	NA	NA
ANGPTL7	1.87944e-05	6.09361e-11	NA	5.15105e-06	1.59162e-12	0.606899	0.34502	1.1378e-06	8.62201e-10	0.498524
AP5M1	0.00245303	2.812e-07	NA	0.000824555	0.15374	1.96159e-05	1.78651e-07	0.00150038	5.44357e-06	NA
APBB3	5.95346e-07	0.162287	0.0103421	1.39173e-08	0.363342	0.00179715	4.26326e-14	4.56595e-11	4.97626e-08	1.42109e-14
ANKFY1	6.10564e-06	0.676591	0.0641322	0.0124886	5.3011e-10	9.83303e-05	6.33742e-10	2.42825e-09	6.91951e-05	0.000702739
ANKRD10	2.79215e-10	NA	7.79679e-07	1.00143e-05	0.017863	0.0801604	0.00412885	9.05584e-09	0.000829006	4.54747e-12
APH1B	0.00853494	9.2678e-06	NA	0.598869	0.00038445	0.00394818	0.000406905	1.27329e-11	2.86464e-08	NA
APOA1BP	0.000320268	NA	0.0154234	0.321715	2.28024e-05	0.0692825	0.469527	1.87944e-05	0.0117048	1.64954e-05
APOBEC3F	NA	NA	NA	NA	NA	0.10482	0.437447	NA	0.599547	0.000248015
APOH	3.5044e-10	0.00274511	0.81353	0.567438	0.0338875	0.625724	0.000311178	0.781146	0.862682	3.59535e-12
ANKRD18B	NA	NA	NA	2.5667e-06	0.000289781	0.314928	2.91038e-11	1.45519e-10	4.33176e-05	0.130661
ANKRD26	NA	0.0359031	1.06581e-14	0.489596	0.82063	0.521218	8.88178e-14	3.55271e-15	0.628876	3.55271e-15
APOO	7.32325e-08	0.000201791	NA	1.14163e-07	4.54747e-12	0.969328	0.00125501	0.488104	0.70998	NA
AK124326	2.2281e-05	NA	NA	NA	0.060006	0.000244919	2.32831e-09	NA	0.000951971	0.214076
AQP12B	NA	NA	NA	NA	0.000379096	NA	NA	NA	0.316048	8.34989e-08
AQR	6.66493e-05	NA	0.565507	0.75656	0.00196106	0.748838	7.10543e-14	4.81598e-06	0.00113956	0.310468
ANKRD33	0.0958157	0.00196106	9.9476e-14	0.000859055	1.01579e-06	9.89114e-06	1.5455e-10	4.9738e-13	0.000256362	4.196e-08
ANKRD39	0.785203	8.20273e-08	8.20273e-08	1.2009e-08	NA	2.29375e-09	0.826382	1.81899e-12	1.81899e-12	NA
ARF3	NA	NA	NA	NA	NA	NA	NA	NA	NA	NA
ARFIP2	NA	NA	NA	0.0587303	2.45927e-09	0.0310127	1.15516e-06	0.000121229	0.000495037	3.56507e-07
ARID2	0.0569639	3.93411e-07	0.27217	0.00054011	8.88178e-14	0.000948836	0.0799344	0.337687	0.00568079	1.02822e-05
ARMC10	7.79049e-10	0.167458	0.109057	0.0158079	0.750062	0.0019437	2.84311e-06	0.00401887	9.62227e-05	1.23058e-08
ARMC9	2.37952e-09	0.00020964	0.0583055	0.00355808	0.836	1.08724e-06	0.238847	6.80735e-11	3.55271e-15	2.15658e-09
ARHGAP15	0.0677685	NA	NA	0.633795	1.00785e-06	0.0032863	0.0993161	0.626092	0.0117717	0.0113912
ARHGAP25	0.29532	0.0129195	NA	0.00307142	9.83558e-08	0.271546	0.0271595	0.47856	0.000826248	NA
ARIH2	NA	NA	NA	0.247025	NA	NA	2.78093e-05	0.0274092	NA	1.02781e-05
ARL17A	NA	NA	NA	NA	0.0136719	NA	NA	NA	NA	NA
ARL5B	NA	NA	NA	NA	NA	NA	NA	0.160156	0.00390625	NA
ARHGAP36	1.83395e-06	0.0515803	NA	0.0502021	4.10898e-09	0.318336	1.74509e-11	1.57172e-10	5.68434e-14	0.00252349
ARHGDIB	NA	NA	0.0280502	0.0298332	NA	0.848904	0.178234	7.45058e-09	0.613638	NA
ARHGEF19	1.21035e-09	0.00692976	3.48153e-07	0.000178609	0.39957	0.309905	5.34883e-07	NA	0.0278551	0.000327296
ARHGEF39	0.00908051	0.159101	2.24889e-05	0.102431	2.43582e-08	0.000899188	1.61555e-09	9.8617e-06	0.000559891	0.140951
ARNTL2	1.01158e-07	0.00389378	0.154154	0.0168124	0.0874627	3.00757e-05	0.000942595	9.09495e-11	NA	9.46831e-07
ARPP19	NA	NA	0.000244141	NA	0.000244141	0.635498	0.000488281	NA	0.892578	NA
ARSA	0.227588	NA	NA	1.63118e-09	0.000163015	NA	NA	1.03764e-08	0.219241	0.000147221
ART1	0.428612	0.6994	2.03879e-09	1.52761e-05	0.562456	2.41079e-08	3.08307e-09	3.958e-08	9.39688e-07	0.816788
ASAH2B	NA	NA	NA	3.19463e-06	3.81301e-05	0.0232061	0.135084	0.000149783	0.389993	NA
ASB15	3.1234e-06	4.67942e-07	0.536701	1.54202e-08	1.26396e-09	4.62753e-05	1.6843e-06	8.94561e-07	0.018989	0.0710492
ASB7	NA	NA	0.172607	NA	NA	NA	NA	0.325806	NA	NA
ASCL5	NA	NA	NA	0.948544	NA	0.000161883	1.17812e-07	0.253948	0.0678478	0.00386559
ATP6V1A	0.227642	NA	NA	0.0292838	4.65661e-10	0.0830636	0.201088	0.165498	0.00515984	NA
ATP6V1G2	NA	0.855336	NA	NA	0.000372767	0.0164067	NA	0.0366492	5.126e-06	NA
ASIC3	3.99972e-06	0.320356	0.0021142	3.5706e-05	0.0291551	0.118442	0.032446	0.277433	0.00902217	NA
ASPA	0.588184	9.87317e-08	1.81899e-11	5.30461e-08	2.05605e-09	2.93714e-06	0.0370622	8.72546e-12	2.51952e-08	NA
ATP8B4	5.0344e-05	0.000431975	0.0128227	NA	3.83346e-09	0.000225616	9.88551e-08	0.869703	0.854969	0.981304
ARL1	NA	NA	NA	NA	0.174805	NA	NA	NA	NA	NA
ASRGL1	0.954284	8.66703e-06	0.0013852	0.954284	0.00725158	4.17494e-08	5.09317e-11	3.75558e-06	NA	4.80359e-08
ASZ1	0.794886	NA	1.59102e-07	0.00582442	3.65276e-10	0.505917	9.9725e-08	0.253094	3.76643e-05	0.000818064
ATR	0.71819	3.16703e-07	7.61149e-06	0.000702739	0.0726507	0.00171605	0.00981186	1.0164e-09	5.69045e-09	9.58408e-10
ATXN7L3B	NA	NA	NA	NA	1.57356e-05	NA	0.873604	NA	NA	NA
ATE1	1	0.000781286	9.34705e-10	0.000781286	5.45859e-05	7.79049e-10	0.00511896	6.97459e-05	0.0185028	0.0127547
ATF7	0.000501121	NA	NA	4.80359e-08	3.10743e-05	0.404563	2.64116e-05	2.23372e-09	8.49018e-05	NA
AVP	0.295995	NA	NA	2.93599e-07	1.62981e-09	0.818716	4.65661e-10	0.0178161	0.154726	0.000819258
AUTS2	NA	2.73247e-08	1.0963e-07	8.23559e-08	2.31353e-10	0.0692825	0.0730249	3.65276e-10	6.10429e-05	0.114442
AB231702	0.000809193	NA	NA	NA	NA	NA	NA	0.00592852	9.53674e-07	NA
AX746631	NA	NA	NA	NA	0.105469	NA	NA	NA	NA	0.695312
AX746903	0.179687	NA	NA	0.000241474	5.64495e-05	0.00053808	0.0615666	0.0512342	NA	0.00161244
ATG4A	0.333566	NA	NA	8.848e-06	6.91075e-06	0.000219202	0.476208	6.77574e-09	0.000219202	NA
ATL1	0.000414186	NA	0.065076	5.18427e-07	7.27596e-12	7.27596e-11	1.03585e-05	1.2348e-05	0.144384	NA
AX747325	NA	NA	NA	NA	NA	0.580338	0.00145841	0.664999	NA	NA
AX747659	NA	3.05176e-05	0.175354	NA	NA	NA	NA	NA	NA	0.231201
ATP10A	7.10543e-13	2.93714e-06	0.000281249	0.0057271	0.00932507	0.153669	5.68434e-14	2.07862e-08	2.88787e-09	1.54984e-08
ATP13A4	0.000172235	1.90143e-09	0.0298557	9.23299e-08	2.6054e-07	1.02074e-07	1.68345e-08	2.37859e-09	0.241905	4.2983e-10
AXL	0.0671404	0.0222548	NA	NA	0.538281	5.15729e-09	0.346458	2.84217e-13	0.00637944	0.0475361
AX748201	NA	NA	NA	NA	0.00222697	0.0544805	2.49594e-07	2.31294e-06	0.0205117	3.54834e-07
ATP2A1	1.1532e-09	NA	1.1532e-09	3.15494e-05	1.61762e-10	3.26144e-07	1.42109e-14	9.9476e-13	4.68958e-13	NA
ATP4B	0.102891	2.63907e-05	3.80771e-06	0.467972	0.0661606	0.00862265	0.276596	0.201593	8.15276e-06	1.81899e-11
ATP5H	1.9445e-09	NA	NA	NA	0.00151762	3.87518e-07	2.53547e-07	0.0106281	4.09882e-05	NA
ATP6AP2	4.87489e-10	NA	NA	0.969328	1.27261e-07	1.35426e-06	0.581124	4.01411e-05	0.000131234	NA
B3GALT1	NA	NA	NA	NA	NA	NA	0.000407934	0.000407934	1.0252e-05	NA
B3GNT2	0.028519	NA	0.00479711	NA	1.78701e-08	0.321715	1.44588e-05	0.690081	0.505917	NA
B4GALNT2	3.09468e-09	4.97626e-08	1.42109e-14	4.26326e-14	9.04795e-08	4.41995e-07	1.42109e-14	3.5044e-10	0.0192014	1.42109e-14
B9D1	2.37967e-05	NA	1.72305e-06	NA	0.000233964	2.08747e-08	0.00248541	5.09317e-11	4.72282e-08	2.54659e-10
BAD	2.28024e-05	NA	NA	6.43497e-07	3.75167e-12	4.59655e-07	1.13687e-13	0.498524	0.0117048	NA
BAI2	6.44866e-08	0.149821	0.196782	3.9293e-11	0.26695	1.6142e-06	0.000159592	0.097986	0.000311178	2.38085e-05
ALOX15	NA	NA	NA	0.563625	0.000323666	NA	NA	2.27926e-05	NA	1.85082e-09
BANF2	7.42242e-05	NA	NA	0.34285	0.248505	NA	0.0237535	6.40284e-09	0.00232851	1.31805e-06
BATF2	9.54676e-05	0.131337	0.000201391	2.28624e-09	2.1246e-06	NA	NA	0.0671404	2.84217e-13	9.276e-07
BICC1	4.68958e-13	NA	2.42623e-06	5.30335e-06	2.84217e-14	0.879193	0.000535732	0.000311178	0.0613801	0.00850174
BBOX1	0.902158	NA	0.00128565	3.84706e-07	4.17705e-07	7.30405e-08	1.23322e-08	5.43983e-05	5.68434e-14	NA
BC010030	0.00836182	0.761536	NA	0.168823	NA	NA	NA	NA	NA	0.803955
BIRC5	NA	NA	NA	NA	1.30385e-08	NA	2.22307e-05	NA	0.356962	5.12227e-08
BC040865	NA	0.135376	NA	NA	0.00427246	NA	NA	NA	NA	0.00012207
BC032910	0.00225526	NA	0.0341738	NA	0.140915	NA	NA	NA	NA	NA
AX746654	0.685314	NA	5.82077e-10	0.0483821	0.06433	7.2422e-06	4.57093e-06	NA	0.000126497	0.0031918
BLNK	0.0715742	NA	3.85386e-09	1.95323e-09	7.15109e-05	9.92095e-11	0.000842969	0.00054011	7.16897e-08	0.000370141
BMP10	2.84217e-13	0.00660268	0.000927968	6.54514e-06	9.3576e-07	0.0234126	2.38646e-06	3.97904e-13	0.862554	NA
BC063788	4.00484e-05	NA	NA	0.000613684	0.131681	NA	NA	1.13687e-13	0.00945172	9.17714e-05
BC093087	NA	NA	NA	7.71601e-06	4.97792e-07	NA	NA	6.68527e-05	NA	3.25963e-09
BC118554	NA	NA	0.000729602	0.0698929	0.212933	0.00930112	3.72529e-09	0.0384184	NA	NA
BC171856	NA	1.8764e-10	0.24942	0.173663	0.000392861	0.565951	0.720958	NA	6.92717e-07	NA
BMP8A	NA	0.0124326	0.000286535	0.00443629	NA	0.00250488	0.0220975	0.00290059	NA	6.98715e-05
BNIP1	NA	NA	5.52973e-10	0.11889	2.91038e-11	6.91216e-08	0.11889	0.0104577	0.0555976	NA
BCAS2	NA	NA	3.05176e-05	NA	NA	0.00209045	NA	NA	NA	NA
BCKDK	NA	NA	NA	9.47818e-06	3.12866e-10	3.67276e-07	1.89505e-05	0.00204487	2.18279e-11	0.68802
BOLA1	0.174354	NA	0.0661606	0.000508038	NA	0.206413	0.000755352	1.81899e-12	2.27068e-05	9.58387e-07
BPIFA3	3.45761e-07	NA	NA	0.938088	0.00254179	NA	NA	NA	0.00712196	1.07421e-06
ADM	NA	NA	NA	0.0529895	5.68434e-14	7.30405e-08	4.10898e-09	0.104504	5.68434e-14	NA
ANXA3	0.00935589	0.804548	0.00183898	NA	0.0756506	0.0991904	1.9403e-05	0.940831	3.1436e-05	1.2639e-05
BRAF	0.000280576	NA	0.744604	0.005577	1.6344e-07	1.58198e-08	1.38607e-09	0.00305158	2.00089e-10	NA
BCL2L15	0.271546	NA	NA	0.211959	1.28466e-11	3.43866e-09	0.0215972	5.52936e-07	0.000726854	0.162287
BCL9L	0.120914	NA	1.75411e-05	2.18137e-12	0.166041	NA	NA	1.54952e-09	4.41091e-05	8.26214e-07
BRD7	3.55271e-14	NA	0.0119474	0.558633	1.47082e-12	4.56477e-08	1.47082e-12	0.000351142	1.08752e-06	NA
AMACR	0.00592671	2.28624e-09	1.794e-07	9.62196e-08	4.94367e-10	0.388347	5.13508e-05	1.15289e-07	0.0292499	0.21664
BDH1	NA	6.11067e-13	2.70006e-13	9.20521e-07	5.71902e-10	0.0515623	6.11067e-13	0.000246211	0.741189	2.40163e-12
BHLHA15	5.39512e-09	NA	NA	9.75452e-05	2.52912e-06	0.214257	0.0798085	NA	0.000388012	0.0248556
BEND3	4.54747e-13	0.0341587	NA	NA	0.00498432	0.0616498	2.27374e-13	1.16767e-06	0.653854	0.000533852
BET1	NA	NA	NA	NA	0.140283	0.0012321	NA	0.212933	0.00619499	NA
BRIP1	0.00135115	4.43936e-05	1.4621e-05	2.69329e-08	0.0264015	0.671023	1.23058e-08	5.19659e-08	2.9801e-06	7.79049e-10
BSPH1	NA	NA	NA	0.00647871	0.00689453	NA	NA	NA	NA	3.54336e-05
BRSK2	0.268217	NA	0.00237625	NA	0.0714102	NA	NA	1.53705e-10	3.74518e-05	0.144401
BTBD18	1.04772e-05	0.472047	0.472047	7.64594e-08	0.000391466	0.912362	5.42807e-08	1.42109e-14	1.42109e-14	4.37894e-06
AX747684	0.918327	7.32494e-06	NA	0.00431679	0.000305436	6.89761e-09	2.30024e-06	6.89761e-09	6.36646e-11	1.02319e-07
BTD	0.158723	0.227563	9.89673e-08	0.00089783	1.59592e-05	0.0426431	0.0257536	NA	1.19015e-09	9.24576e-05
BTN2A1	NA	0.00518705	0.000857565	0.839775	0.582827	0.0513649	1.9897e-08	0.000274113	3.87287e-07	2.80238e-09
BTRC	0.00621726	NA	NA	6.10948e-06	1.57394e-07	0.555138	0.594814	0.000590569	9.31323e-09	NA
BX648961	0.00113155	0.499611	0.399743	NA	1.34706e-05	0.427021	1.87904e-05	NA	0.0022483	NA
C10orf113	3.41061e-13	2.29137e-06	NA	0.590802	1.54461e-05	1.87944e-05	0.0445809	NA	7.28181e-05	NA
C10orf2	0.242788	6.84578e-06	4.62753e-05	0.00707561	0.000305812	9.26294e-09	6.69693e-05	0.439959	1.86041e-07	5.52349e-09
C10orf76	NA	NA	1.96779e-05	0.0552396	5.31785e-06	0.0157429	NA	1.18986e-05	4.65661e-09	NA
C11orf30	0.0266935	NA	4.54747e-13	3.84447e-05	2.56209e-05	1.26797e-08	3.18323e-11	0.487725	0.0196015	NA
C11orf54	8.21001e-09	NA	NA	0.257988	0.00605169	0.220616	2.16005e-12	0.040878	0.038554	NA
C11orf74	1.03803e-08	1.59592e-05	3.46693e-09	NA	0.750062	1.70531e-09	2.74071e-09	0.794371	1.22587e-05	0.000201992
BC040901	5.24521e-05	1.33514e-05	NA	4.76837e-06	0.242842	NA	NA	0.000720978	NA	0.0290146
C11orf93	NA	0.493102	NA	3.45408e-05	4.22971e-07	0.00611536	1.03803e-08	0.0284305	0.000425973	1.81009e-09
C12orf40	0.373767	3.36755e-06	1.39628e-05	0.000374768	3.60475e-09	0.00136249	5.68434e-14	7.00823e-10	0.00427739	9.1319e-11
AK097351	NA	NA	NA	NA	0.0273438	NA	NA	NA	NA	NA
AX747367	0.000108851	0.0543053	6.14923e-08	0.00678101	5.0818e-11	8.21001e-09	0.70721	0.00377814	0.498524	1.68598e-10
C12orf55	0.00667634	NA	0.77952	NA	1.2601e-06	1.05491e-09	8.27893e-10	2.13972e-06	2.58371e-09	1.33902e-05
C12orf71	NA	NA	NA	0.745698	0.459558	0.302114	3.63798e-12	4.58749e-09	NA	1.84136e-07
C14orf142	2.69174e-08	0.00277063	NA	0.0158762	0.00533217	0.000193346	3.48878e-06	0.00015974	0.00386751	NA
C14orf23	0.0422964	NA	NA	NA	4.14215e-07	0.0282662	1.48685e-07	0.000145687	0.00423211	0.0160082
AK097370	0.472261	NA	7.35087e-05	0.03819	2.03272e-10	0.0551445	0.000555883	NA	NA	NA
C15orf32	9.05991e-06	0.50284	0.799034	0.234762	0.0358753	0.176192	0.12888	NA	6.67572e-06	NA
C15orf54	6.3481e-09	0.558633	NA	4.81598e-06	1.53109e-07	NA	NA	3.22331e-10	3.52809e-09	7.07487e-11
C16orf46	0.000518221	2.76005e-07	1.17799e-09	NA	0.00549856	0.000105054	1.08724e-06	0.267842	0.0236381	2.27374e-12
C16orf74	NA	NA	NA	2.35625e-07	9.31323e-09	0.182076	0.0015878	0.00106538	8.01962e-06	0.115614
C16orf93	0.0506286	0.0459877	1.76854e-11	0.322872	1.06237e-09	0.190928	1.15446e-08	0.10975	0.00168159	4.86722e-13
C17orf107	NA	0.0580596	0.704261	0.000707137	0.00154965	0.0278254	5.04766e-07	0.146148	0.00976339	0.00783459
BC014150	9.09495e-13	0.0293963	0.0192252	0.000101875	1.88265e-10	0.34131	2.27374e-11	1.88265e-10	0.00300382	0.1002
ANAPC15	NA	NA	NA	NA	NA	NA	NA	0.206055	NA	NA
C17orf67	3.80771e-06	NA	NA	0.000675467	1.27835e-06	1.2009e-08	1.2009e-08	0.0343949	3.63798e-12	0.00335754
C17orf85	0.0344039	NA	NA	0.349918	0.0608448	2.43291e-05	1.72804e-08	0.0130469	0.0016401	NA
C18orf56	0.731389	0.964313	0.0122945	NA	0.000407934	0.000152588	1.0252e-05	NA	NA	1.19209e-06
C19orf33	3.3473e-06	0.0026155	NA	0.127497	4.72282e-08	0.90665	6.24739e-07	NA	7.40329e-09	NA
AB231705	4.66165e-08	5.85221e-09	1.09871e-08	NA	0.0153941	6.80736e-08	0.77952	4.62753e-05	0.115607	1.92113e-09
C19orf53	NA	0.472737	0.0198854	3.75558e-06	0.518291	0.170191	1.2417e-06	2.2398e-05	5.09317e-11	NA
C19orf70	0.491065	1.18829e-05	NA	0.310077	1.10595e-09	0.000550848	0.000897357	0.0136814	0.00196215	NA
C1orf101	0.000297051	0.23625	3.96795e-10	6.36773e-09	7.41483e-07	0.00606606	3.091e-10	0.208089	7.81597e-13	2.39552e-10
C1orf123	0.565394	NA	NA	0.0033846	2.16824e-07	7.97445e-09	1.25344e-06	0.158359	0.852456	NA
C1orf168	0.479393	5.76904e-10	7.10543e-15	0.665676	1.42109e-14	4.89642e-05	4.9738e-14	3.8552e-08	1.42109e-14	0.00652465
BC033456	9.46831e-07	0.57591	NA	NA	0.0221579	0.917591	3.20142e-10	0.614255	NA	1.01158e-07
C1orf95	NA	0.00823212	1.90735e-05	NA	NA	0.00169373	NA	NA	0.00169373	NA
C1QTNF2	0.00341403	NA	NA	0.956858	0.00615118	0.0313198	1.98952e-13	0.828663	5.88329e-12	1.64758e-07
ACOT2	NA	NA	NA	4.54747e-13	4.68657e-05	4.1083e-05	8.11279e-06	4.54747e-12	1.08541e-07	2.43745e-10
C1R	7.18311e-08	2.74071e-09	3.45204e-07	4.44909e-07	1.67616e-07	0.824294	7.49509e-06	0.643108	1.33902e-05	2.03879e-09
C20orf196	0.454385	0.607569	0.131197	0.00720064	1.96465e-11	0.305599	0.834973	7.10543e-15	2.58392e-05	0.00162086
C1orf194	0.00159583	NA	0.129749	2.21056e-07	NA	1.25056e-12	2.84217e-14	2.82095e-05	5.95346e-07	NA
C1orf233	NA	0.418041	NA	0.00283813	NA	NA	NA	NA	NA	0.418041
C1orf61	4.03204e-07	NA	8.00355e-10	NA	0.869759	0.0855221	0.0973666	2.44414e-07	NA	6.50471e-09
C21orf128	0.239477	2.82489e-05	0.00034511	4.99189e-07	0.529406	0.011705	0.000414196	NA	NA	0.00385993
C22orf24	0.714597	0.000149783	NA	2.07001e-08	1.81899e-12	1.95008e-05	6.46069e-08	0.744604	1.81899e-12	0.0110744
C2CD4B	NA	NA	NA	3.17991e-05	NA	NA	NA	0.678179	0.143773	1.02073e-06
C2orf47	7.10543e-14	0.002101	NA	0.341458	2.40163e-12	4.26326e-14	9.20521e-07	0.0348191	1.80432e-09	1.68487e-05
C2orf69	9.03482e-05	NA	0.247616	0.137282	8.08581e-05	4.97885e-06	7.78755e-12	0.866861	0.0973476	NA
C2orf82	NA	NA	NA	0.915394	NA	NA	NA	NA	2.22307e-05	NA
AP1S2	NA	NA	NA	NA	NA	NA	NA	NA	NA	NA
ACTBL2	NA	1.74105e-08	4.54747e-12	1.23718e-06	9.09495e-13	5.32398e-07	1.72804e-11	3.64707e-08	0.11764	2.93932e-07
C3orf22	0.0933224	0.737573	0.00272952	0.572177	NA	1.00117e-08	0.0707899	0.00984366	NA	4.42378e-09
C3orf55	0.0101252	NA	NA	NA	0.0126915	0.0194731	0.355416	0.00137424	NA	0.73347
C3orf83	0.000592757	NA	1.81899e-11	0.224797	0.0288793	0.00449973	3.25763e-07	0.000120097	0.0848496	1.35515e-08
C4orf26	1	0.0156634	NA	0.272913	0.0369929	0.00227797	1.42109e-14	0.00327987	6.90764e-08	0.00174999
C4orf47	NA	NA	1.69114e-05	4.47997e-12	0.580624	1.35856e-05	1.76784e-09	0.0731874	3.82101e-06	0.000586433
C5orf30	NA	NA	NA	6.23986e-08	0.104919	0.00248241	0.0504398	1.16415e-10	0.000464765	NA
C5orf54	0.00158063	NA	0.513484	0.0129718	0.264126	0.000703334	0.672024	2.32831e-10	1.62981e-09	0.608817
C6orf132	0.000118725	8.58169e-07	1.23322e-08	NA	0.712162	NA	NA	0.0801322	1.87583e-12	3.20682e-05
C6orf201	0.00254179	7.30552e-10	0.00389513	0.00930274	0.00498432	0.000193349	2.27374e-12	0.146934	NA	5.97184e-05
C6orf57	2.87139e-05	0.00299192	0.280982	0.00226854	0.000827328	0.0348958	0.823062	0.00010421	1.29115e-06	NA
APOBEC3H	NA	0.0844206	NA	0.000319504	0.437905	1.2417e-06	1.2417e-06	NA	1.50612e-09	0.028441
C7orf31	0.0174513	NA	NA	0.0270156	0.000219225	1.16073e-06	4.9738e-14	7.7566e-10	0.635905	1.58806e-12
C7orf62	2.50036e-09	NA	2.50036e-09	0.000118474	1.40556e-06	0.0502713	1.42109e-14	1.53013e-08	2.39133e-07	1.16063e-07
C8orf22	NA	2.85916e-07	0.479773	6.51926e-08	9.61954e-05	NA	NA	NA	2.35625e-07	NA
C8orf59	NA	NA	NA	0.0428499	0.000666972	0.175584	1.24547e-05	0.00154965	4.403e-06	NA
C9orf123	0.00263897	NA	NA	0.0817138	0.00695519	0.000402217	1.81099e-08	0.0841547	7.88019e-07	NA
C9orf41	NA	NA	NA	0.149539	8.63802e-08	0.144481	1.62981e-09	0.0353429	2.63029e-06	NA
C9orf169	0.028404	0.268217	NA	2.73171e-06	2.39638e-07	NA	NA	1.00143e-05	8.22183e-10	0.410904
ACTR3B	NA	NA	NA	0.0319195	0.21568	0.00710106	0.000851631	0.242842	0.242842	NA
BSPRY	0.000961963	NA	NA	NA	0.00228509	0.000441756	0.816788	2.9801e-06	0.809298	0.517781
AL953854.2-002	NA	NA	NA	NA	NA	NA	NA	NA	NA	0.952984
AK055601	0.00173717	NA	NA	NA	0.919664	0.00173717	0.000126321	1.08412e-07	0.539333	0.0598791
C18orf63	0.103887	1.17301e-06	5.87546e-08	0.132468	1.0778e-09	0.704223	5.3011e-10	1.36167e-09	1.81503e-08	5.28939e-08
BC094791	3.72529e-09	0.000123337	NA	0.00814298	1.86265e-09	NA	NA	NA	NA	1.86265e-09
AK130486	NA	NA	0.000292778	0.785365	0.000197411	NA	NA	NA	0.000130653	NA
AK094577	0.930735	0.635701	NA	0.000541123	1.18986e-05	NA	NA	NA	0.000106774	1.86265e-09
BC127192	NA	0.000193685	NA	NA	0.567035	0.000341848	0.00141653	0.000583388	1.25915e-06	NA
C15orf37	NA	NA	NA	0.0759889	NA	0.00127975	0.0386317	0.0386317	0.0759889	0.131591
C1orf27	3.97025e-05	0.000146515	0.0156634	9.32816e-06	5.23306e-09	0.0608132	0.718204	0.104421	0.000268286	0.185831
AKT1	NA	NA	NA	NA	NA	NA	6.10948e-06	NA	6.51926e-09	NA
AMMECR1	NA	NA	NA	0.0787293	NA	9.08375e-05	9.08375e-05	0.00390065	0.252249	NA
ANAPC16	NA	NA	NA	0.232422	NA	0.431641	NA	NA	0.0488281	NA
ALAD	1.45519e-11	0.00507448	NA	NA	0.00652904	0.224591	0.0800417	0.149064	3.45608e-08	1
BIRC6	3.60242e-05	6.69693e-05	0.000728433	1.28126e-05	0.0436397	2.54824e-08	1.92948e-08	0.00840518	0.000137265	7.368e-09
AK2	7.07408e-05	NA	NA	0.000151531	1.45519e-10	0.000528623	2.91038e-11	2.91038e-11	1.65383e-07	NA
BYSL	0.00744028	0.0209755	NA	NA	0.773105	0.0295367	2.79497e-07	0.0170369	0.0215972	NA
C3orf56	0.678179	NA	NA	0.104174	0.0136237	NA	NA	0.0900242	0.000583388	NA
C1QA	0.00307142	0.887468	NA	5.27223e-12	4.10575e-06	7.61702e-12	0.352295	0.374599	0.0150853	0.00285026
AK130759	0.923966	0.0172009	0.610152	0.406033	0.566068	0.12888	0.000941277	0.655639	NA	0.000304699
C9orf78	0.840783	NA	NA	0.000184342	0.66168	0.000184342	0.514851	2.98023e-08	4.57466e-06	NA
CA11	4.89075e-05	2.02344e-05	NA	0.00990953	0.128775	0.021624	2.66358e-06	0.124047	0.00179364	NA
CA5B	1.42109e-14	NA	NA	3.19721e-08	5.75699e-09	0.109392	2.84217e-14	2.59388e-06	3.19721e-08	NA
CABLES2	0.760512	0.0240329	6.82121e-13	0.104813	9.07727e-07	1.01636e-10	4.65446e-05	2.30084e-08	9.79981e-10	3.18323e-12
CACNA1A	1.40556e-06	0.0644481	0.00343189	1.72902e-06	4.68958e-13	0.546258	0.945682	NA	0.00649696	0.091603
CACNA2D1	0.827484	NA	NA	9.09495e-13	0.0735226	6.45272e-05	9.09495e-13	0.0512342	9.7225e-10	5.19349e-08
CACNG3	NA	NA	NA	NA	NA	NA	0.701881	0.000419617	0.000419617	NA
CADM1	NA	NA	NA	9.22009e-06	0.427955	0.000729602	0.0185295	2.55182e-07	0.00218778	NA
CALCA	NA	0.131337	0.261778	4.06673e-05	3.83381e-05	4.84612e-05	0.420038	0.509064	2.6757e-05	5.68434e-14
CALM1	NA	NA	NA	NA	NA	NA	NA	NA	NA	NA
CALU	NA	NA	NA	9.59635e-05	NA	NA	NA	0.0120766	3.02345e-05	NA
CAMK2N2	NA	NA	NA	NA	NA	NA	NA	NA	NA	NA
CAMSAP3	NA	0.0123184	3.05533e-13	3.19146e-09	NA	1.92311e-08	4.06249e-07	6.70074e-07	7.70744e-07	0.00101053
CAPN10	0.957116	0.00423211	0.346756	NA	NA	0.0154582	4.83198e-06	2.43062e-10	0.862427	1.45519e-10
CAPN7	9.4207e-06	NA	1.50067e-11	0.710415	0.213552	9.78907e-07	2.93749e-05	8.9605e-07	0.274296	8.8005e-08
CASP9	0.00196106	0.000109672	NA	0.0716399	0.00181796	9.02943e-10	8.15328e-05	0.0917272	0.0076848	1.3101e-07
CAPZA1	NA	NA	NA	0.941991	0.18425	0.0456423	0.0130247	0.0130247	0.967753	NA
CARD8	0.869488	NA	NA	NA	NA	NA	NA	0.498009	NA	0.521673
CASP16	1.94689e-12	2.98363e-05	4.97677e-06	0.00172764	2.38085e-05	1.68487e-05	0.0141841	0.640682	0.189493	NA
CASC3	0.000220182	0.0729709	NA	8.72908e-05	0.0436569	0.00842063	0.428713	1.48453e-05	1.8764e-10	NA
CATSPER3	0.0256663	0.178929	1.41497e-10	NA	0.000409631	3.37508e-11	1.25056e-12	7.87277e-05	3.96795e-10	1.22226e-06
CBFB	NA	NA	NA	NA	0.719727	NA	NA	0.00201416	NA	NA
CBR3	0.00147314	0.185923	0.44648	0.0271595	0.0816973	0.315294	7.25578e-10	1.78591e-05	1.39173e-08	NA
CBX4	NA	NA	NA	2.57518e-07	NA	NA	NA	NA	0.00873066	NA
CC2D2B	0.0610659	0.00242045	6.89631e-06	0.0112879	1.15019e-05	5.79125e-06	3.2324e-10	7.50806e-05	0.0482622	2.33389e-05
CCDC104	2.58819e-09	0.305178	NA	0.724344	0.204907	1.90621e-06	2.95427e-09	2.13637e-05	0.688768	0.96664
CCDC114	0.442144	0.137901	0.0756506	1.27194e-06	0.17875	6.36646e-12	4.54747e-12	0.000650658	0.0276008	0.577331
CCDC126	3.49246e-10	NA	NA	8.87085e-08	3.19444e-06	7.2422e-06	2.02446e-07	0.000840397	6.40284e-09	4.31901e-08
CCDC138	0.0700046	0.00029367	0.051355	3.53708e-11	0.000104434	2.11587e-06	5.41434e-12	6.46175e-10	0.128566	0.0143271
CCDC149	4.13135e-09	0.00401887	8.97467e-06	0.238916	0.0930214	4.53319e-06	2.45952e-05	0.0773036	5.52349e-09	0.0426431
C17orf70	0.000373405	0.894311	0.000136164	0.119984	0.000644151	4.56224e-08	0.000152057	4.23483e-10	4.21778e-11	2.47212e-09
C21orf2	0.356962	0.00135648	0.000378244	9.95584e-07	0.00269635	NA	NA	9.31323e-10	NA	4.65661e-09
C19orf54	0.000448286	1.1532e-09	6.11067e-13	0.757096	0.0146287	0.0203692	0.000559891	0.121802	0.686401	4.68958e-13
C8orf33	0.00671387	0.00305176	0.0107422	NA	0.00231934	NA	NA	NA	NA	0.241211
C19orf71	4.00178e-11	0.000685358	0.00865242	2.20497e-07	NA	4.54747e-13	5.17639e-09	5.90808e-09	0.00768375	0.00192717
AK310526	NA	NA	NA	NA	NA	0.000106214	5.79166e-07	0.82635	0.000163538	0.0342672
ANGPT1	NA	0.0295416	3.20142e-09	5.92263e-08	0.00511945	1.46097e-05	5.06116e-08	0.000546065	5.82077e-11	NA
C14orf159	9.37916e-13	3.12639e-12	0.641538	5.68434e-14	3.97904e-13	2.49095e-07	4.40959e-06	7.9413e-06	1.35112e-06	5.68434e-14
C19orf35	1.86265e-09	0.000152871	9.22009e-06	0.0767212	NA	3.45316e-05	1.02445e-07	NA	0.0384184	5.59259e-05
ANKRD40	9.02051e-06	NA	0.043317	2.09024e-07	0.759441	0.000115162	0.0397019	1.21531e-10	7.50561e-10	0.0176365
C2orf83	NA	NA	NA	NA	0.00115967	NA	NA	NA	NA	0.000427246
ATXN7L3	NA	NA	0.00433898	0.126213	0.000407934	NA	0.500905	NA	1.19209e-06	NA
ANAPC1	1.23592e-10	3.09468e-09	2.39552e-10	0.525471	0.44648	3.55271e-13	0.0357721	1.42109e-14	0.127057	4.17583e-08
AGXT2L1	0.979095	2.12076e-06	0.00938259	5.30335e-06	2.79497e-07	0.00695458	0.00307142	2.78285e-09	2.84217e-14	0.625724
C16orf78	0.000180348	NA	NA	0.000374768	1.81899e-11	0.0331446	0.000147221	0.00304354	0.409906	9.1319e-11
C3orf27	0.0211271	NA	NA	NA	0.0087148	0.00433505	3.93391e-06	1.19209e-07	NA	NA
ARPP21	0.0147054	0.465049	3.55271e-15	0.502122	0.0341262	1.77636e-14	1.69114e-05	0.968551	3.90799e-13	1.2855e-05
AP1S3	NA	0.992295	NA	0.915394	3.07336e-08	1.27591e-07	1.04504e-05	0.0157429	2.85916e-07	NA
ATP6V1G3	0.412756	NA	NA	0.00183254	0.605517	0.000388396	0.00183254	0.128884	0.000979019	NA
C8orf34	2.50222e-08	NA	2.62376e-09	0.805328	3.85386e-09	0.859168	5.19374e-07	2.70717e-12	6.17817e-12	NA
ASB8	NA	NA	0.00406074	NA	NA	0.000646785	0.000646785	1.04308e-07	4.09782e-07	NA
AK131516	1.94996e-09	NA	NA	0.0798085	4.53078e-07	0.289213	0.379637	0.350166	2.77214e-09	NA
C6orf58	0.0565834	NA	NA	0.00123081	9.09495e-12	0.00758486	0.0106281	9.09495e-12	8.83105e-05	NA
C2orf88	0.720429	NA	NA	0.411105	0.0699169	0.00561805	1.45519e-11	0.0096163	0.000463389	0.000684494
CAMK4	0.026404	NA	0.336119	1.25056e-12	9.83558e-08	0.357792	1.42109e-14	1.94689e-12	1.42109e-14	NA
BC043529	0.00745201	0.0448759	0.0122945	NA	0.169523	0.0698171	1.3113e-05	0.940555	0.964313	0.0858278
AARD	NA	0.240533	0.00251639	0.0456797	NA	0.811536	0.877407	0.811536	NA	0.00390065
ANKRD55	0.00786118	0.000340841	7.44784e-06	2.84217e-13	0.287255	5.30461e-08	0.203198	0.0511935	0.0582608	1.51468e-07
C8orf74	0.795082	0.0121631	0.0567872	0.704802	0.00316285	4.4196e-08	7.84144e-05	NA	1.63084e-10	0.88814
APOA1	0.00930274	NA	0.00930274	0.000115587	9.13496e-09	0.026503	0.000109012	0.00155184	1.26862e-06	NA
AX748210	0.00945282	NA	NA	NA	NA	NA	NA	NA	0.441334	0.0140686
ADRB2	NA	NA	NA	5.68434e-14	0.212448	2.84296e-05	1.53048e-05	0.102074	2.32402e-07	NA
ADCK1	1.83395e-06	0.140329	0.070666	0.028391	0.000942904	0.946539	3.84706e-07	0.771326	7.64651e-05	0.117332
C2CD4C	0.30882	NA	0.088371	NA	NA	NA	NA	7.27596e-11	0.00143029	9.65432e-05
CALM2	NA	NA	NA	NA	NA	NA	NA	NA	NA	NA
ADPRHL2	NA	0.000479453	0.00583165	1.54651e-05	0.183117	0.0258986	0.000205904	1.81899e-12	8.83105e-05	NA
C5orf34	2.19897e-06	0.00482025	7.10543e-15	0.722613	5.62252e-10	4.04405e-11	7.10543e-15	4.04448e-10	7.10543e-15	0.657183
C9orf16	0.000175476	NA	NA	0.000107646	NA	NA	NA	0.00390065	NA	NA
BANK1	0.423755	1.53818e-07	3.55271e-15	0.00011545	0.00129257	0.843708	2.33389e-05	6.37586e-07	0.0284766	6.80985e-05
ABHD6	2.58981e-05	NA	NA	5.57085e-08	0.071134	0.000392826	5.10427e-05	1.78701e-08	0.00201984	NA
ACSBG1	0.0125658	NA	5.80652e-08	0.385593	9.04932e-08	0.487995	0.000163015	9.70833e-05	0.000113677	0.00304354
ARF4	0.167725	NA	NA	0.454834	NA	NA	NA	NA	NA	NA
C1orf63	0.0207546	0.0584029	0.0436264	0.00035719	1.12746e-05	0.231737	0.216296	0.000140394	NA	0.135084
C9orf129	NA	NA	NA	NA	0.0674015	0.543631	5.82077e-11	NA	0.00740791	0.000177404
AX748230	1.16629e-06	NA	0.0940749	0.00167335	5.17639e-09	0.0258114	0.00317837	1.2639e-05	0.13457	0.0419578
AQP2	0.12185	NA	NA	0.00554913	0.00627903	0.901542	0.000841526	0.0406691	4.59227e-08	4.74196e-06
AIF1L	9.31323e-10	NA	0.000195351	0.000160375	0.706253	0.209397	0.421377	0.0355817	1.27591e-07	1.86265e-09
CARD9	0.00254038	0.00362615	0.0105044	NA	0.0276008	0.0065404	0.365108	7.8286e-05	1.50067e-11	0.0158251
C3orf58	NA	NA	NA	NA	NA	0.00585938	0.130859	NA	0.0371094	0.00390625
ANP32E	0.00236215	NA	0.00319098	NA	0.000897357	0.000897357	2.897e-07	8.14907e-10	0.0200332	NA
ALKBH7	0.964336	0.00239932	NA	0.464246	0.10706	NA	NA	0.0121309	0.000112427	NA
CCDC159	3.08812e-08	0.286582	0.0841903	5.13865e-11	3.40714e-08	4.5332e-07	6.07656e-11	NA	1.15676e-10	0.946539
ADNP2	0.898007	0.137319	0.0142604	7.92629e-06	0.00022752	0.000305436	0.144401	0.0104413	6.89761e-09	NA
APOBEC4	0.0076848	0.0005198	NA	0.264023	0.939253	0.0176113	3.3138e-06	4.07709e-11	0.203587	0.0389549
CCDC171	0.00496796	0.354075	0.0388472	3.35782e-08	0.0547314	1.19015e-09	0.0313437	9.38412e-08	0.0180275	3.89717e-09
CCDC180	0.000383574	0.142132	1.42109e-14	0.000168922	6.24475e-07	7.10543e-15	7.10543e-15	0.00743926	4.54747e-12	0.915032
AVPR1A	2.96201e-06	5.42807e-08	0.000638432	4.09891e-07	2.96201e-06	0.870931	5.42807e-08	7.97197e-07	0.427823	9.8617e-06
AARS2	1.35912e-07	0.946126	NA	0.158723	5.19659e-08	4.13232e-06	0.900134	0.0695521	0.00200798	1.51319e-09
CCDC28B	7.36327e-09	NA	NA	NA	0.354211	0.0126745	NA	0.017531	0.00816422	NA
CCDC41	5.62252e-10	5.65856e-08	6.75016e-14	0.184222	9.82325e-12	2.4869e-13	1.58806e-12	1.77636e-14	7.50806e-05	NA
CCDC58	NA	NA	NA	0.455916	NA	NA	NA	0.12032	1.27591e-07	NA
CCDC67	1.26055e-08	6.00409e-13	0.00309861	0.165131	5.31806e-05	2.15658e-09	6.00409e-13	0.000250443	0.0871682	2.88569e-10
C6orf203	0.262407	0.240479	2.43582e-08	NA	1.42109e-14	0.403654	1.94689e-12	0.567438	0.0129195	9.27986e-06
CD207	0.166041	4.58478e-10	NA	0.0979129	3.05533e-13	0.00123367	0.000185563	NA	8.95994e-12	0.803367
AK124439	5.84163e-07	1	0.000193346	0.226508	1.60071e-10	0.135084	0.000569883	0.857582	0.000452332	4.3201e-09
CCDC77	0.0081367	0.0106622	0.24942	0.922428	0.000139862	2.84217e-13	9.37916e-13	1.26996e-08	1.08966e-05	1.98952e-12
ABHD16A	1.53213e-08	NA	NA	NA	0.520996	0.000189948	0.00637837	1.53213e-08	0.148044	NA
CCDC85B	NA	NA	NA	0.0394816	NA	0.000149608	0.16881	0.00281465	NA	0.000107646
CD28	1.63497e-07	NA	NA	6.73299e-09	0.00627903	0.719662	4.54747e-13	4.86125e-10	3.252e-07	NA
ANHX	0.0087148	0.0691017	0.019442	NA	0.218219	NA	NA	NA	NA	NA
CCDC91	0.00945172	NA	NA	8.62201e-10	0.248265	6.78285e-08	1.13687e-13	0.141007	0.00124113	1.13687e-13
CD300LG	1.05445e-11	0.00081383	1.01358e-09	2.30483e-09	1.05871e-10	1.88614e-08	1.67685e-06	4.78405e-05	4.4196e-08	2.58115e-09
CCKAR	0.276195	NA	NA	1.78591e-05	4.38897e-05	0.862682	0.81353	0.0895497	0.00159583	0.330834
CD55	5.44762e-08	0.00441007	1.64e-08	0.359255	2.8695e-08	0.0104026	2.0573e-08	4.10137e-05	7.5178e-06	1.13687e-12
CD3G	0.00482025	0.318028	NA	0.913658	3.55271e-15	0.044884	0.489596	1.51641e-05	3.54528e-05	NA
CDCA8	0.0108573	NA	NA	NA	2.28546e-06	0.00571114	1.04054e-05	1.7053e-13	3.26048e-09	3.40714e-08
CDC5L	NA	NA	NA	0.803368	2.32831e-09	0.000772963	4.65661e-09	0.000256401	0.000334546	NA
CCL19	2.82294e-07	NA	NA	1.81899e-12	1.81899e-12	1.16415e-09	9.58387e-07	3.63798e-12	0.000426608	NA
CCL28	0.316713	NA	NA	3.84262e-11	0.000284136	0.104813	0.0183796	0.806445	7.50333e-12	NA
C3orf30	1.25738e-09	1.01453e-05	0.000759824	0.511412	0.000258264	NA	NA	0.000759824	1.01453e-05	0.00192717
CDH18	0.956858	0.0380997	6.86461e-09	1.22213e-12	8.05748e-07	0.00341403	7.8586e-11	0.373767	0.345181	0.803445
CCM2	1.577e-07	NA	9.09495e-13	0.817507	0.262641	1.577e-07	1.81899e-12	1.14687e-09	1.53213e-08	2.10896e-06
CD72	0.188012	1.00785e-06	0.0157216	0.263187	0.0511935	1.07664e-07	0.312736	NA	1.14836e-08	1.41483e-10
CDH4	2.27374e-12	1.16629e-06	4.54747e-13	3.4488e-09	0.208958	1.50067e-11	0.296886	1.39607e-10	0.000585985	0.00242743
CCND3	NA	NA	0.0196608	0.0120476	0.00218778	0.0185295	0.00347516	0.00663954	0.036435	0.00186401
BC043554	0.0240016	1.8023e-05	0.106438	0.269906	0.904596	0.286518	2.32831e-09	NA	NA	2.00234e-08
CDKAL1	3.20845e-05	NA	NA	3.53708e-11	1.96159e-05	0.436114	0.0410027	0.000161125	0.30078	NA
CD86	0.070956	0.00274511	0.427823	0.357792	0.070956	0.152868	0.0419585	0.091603	1.25445e-05	2.40163e-12
CDAN1	3.48613e-08	NA	0.960694	0.447088	1.44517e-09	0.000139139	9.05014e-08	0.0654048	6.14738e-09	0.0890553
CDC25B	0.00259915	8.84062e-09	7.10543e-15	3.78327e-08	7.10543e-15	0.0189821	2.76005e-07	NA	0.000636345	2.4869e-13
CDHR5	0.000638458	0.00010101	0.000107966	0.685016	3.54559e-05	0.764825	3.54559e-05	NA	2.53547e-07	0.307392
CDK17	NA	NA	NA	NA	0.0424892	0.944107	0.683986	0.12084	3.57628e-07	NA
CDC42BPG	0.0569639	2.11412e-08	1.77636e-14	0.000311644	5.26121e-11	0.685981	4.6535e-09	6.73748e-09	0.105338	1.77636e-14
CDK5	NA	NA	NA	NA	NA	NA	NA	NA	NA	NA
CDKN2AIP	0.0221662	0.958542	NA	1.32235e-07	1.44588e-05	0.144224	0.647952	0.363174	5.65933e-10	NA
CENPI	3.59407e-06	NA	NA	4.92124e-07	7.99582e-08	0.000137265	0.00414352	2.03879e-09	5.52349e-09	4.92208e-08
CCNJL	0.000104434	0.277433	NA	0.545005	0.000244925	0.96353	1.36147e-10	0.128566	1.46895e-08	3.54037e-08
CCP110	0.0214768	0.203937	6.40748e-06	0.639065	0.124903	0.581655	8.11737e-10	1.97229e-08	0.000462457	4.09008e-08
CENPV	2.67029e-05	NA	NA	NA	NA	0.56776	3.8147e-05	NA	0.828785	NA
CCR8	4.23483e-10	7.59109e-07	1.43359e-10	0.00979867	0.248265	1.03399e-05	0.812771	NA	0.0207809	0.949341
CCT3	0.000509917	NA	1.936e-05	8.47151e-05	NA	0.0120855	1.32805e-05	0.186649	0.000991061	NA
CDR1	0.0209106	0.0184287	0.208314	0.0475361	0.102074	0.163105	0.000901355	0.509064	0.703838	9.276e-07
CDX2	0.0263567	7.20471e-05	1.49012e-08	0.0102569	0.00117213	1.10492e-05	2.23517e-08	0.00290199	2.45869e-07	NA
CEP170P1	NA	NA	NA	6.2224e-08	NA	0.00781189	3.25497e-06	0.67987	NA	5.82077e-11
AMN1	0.00218312	NA	NA	NA	0.0593945	1.05239e-07	3.74042e-07	0.00167876	8.14907e-09	0.0118405
CEACAM3	NA	NA	NA	NA	0.000919938	NA	NA	NA	2.5183e-06	0.105626
CEBPG	2.32831e-10	NA	NA	1.16415e-10	0.0177814	0.865999	6.23986e-08	0.387987	0.0525682	NA
CELF1	NA	NA	NA	NA	NA	0.264526	NA	NA	0.00896454	NA
CELSR3	0.493102	0.664	0.00106615	0.150338	0.00122134	0.223866	0.010524	3.2733e-06	0.000253604	0.0361922
CEP57	0.00637341	0.000392861	0.240521	7.59006e-08	0.00240827	5.40012e-13	3.69283e-10	0.199322	5.88329e-12	0.272645
CEP95	0.374486	NA	1.67616e-07	NA	7.368e-09	9.39688e-07	2.74071e-09	3.76554e-06	7.79049e-10	9.38602e-06
CERS4	0.084466	0.611694	0.00278041	2.93749e-05	0.252884	0.0406691	0.208958	2.08113e-05	8.74419e-06	0.000193812
CETN2	NA	NA	NA	0.175666	6.98715e-05	0.000981516	0.0186929	NA	1.18986e-05	NA
CHRNA6	1.76719e-06	0.0298566	0.147619	1.23058e-08	1.92948e-08	0.946126	0.147619	0.720964	2.74071e-09	NA
CFHR3	NA	NA	NA	NA	NA	3.75509e-05	5.03659e-06	NA	4.17233e-07	5.96046e-08
CD101	0.00132545	0.00981186	0.929044	0.0682823	0.0726507	0.0247716	7.57049e-10	2.13554e-08	3.42168e-09	0.341398
CD180	4.85293e-06	0.227113	2.4869e-14	0.00054011	6.26425e-10	4.9738e-14	1.77636e-14	0.0236381	8.88178e-14	7.10543e-15
CIDEB	0.00169401	0.0922714	0.00196135	1.27329e-11	0.472078	0.00161244	0.382132	0.0100329	6.00448e-09	1.70053e-05
CGB2	NA	NA	NA	0.00358216	0.0352342	0.0248336	2.27374e-13	0.0124876	2.23591e-06	NA
C22orf26	NA	NA	NA	NA	NA	NA	NA	NA	0.0249634	0.403748
CHST10	0.00130649	0.81183	NA	2.82995e-10	0.00637341	5.30461e-08	1.5234e-11	2.84217e-14	0.000357438	0.253953
CISD1	NA	NA	NA	NA	7.2422e-06	0.735656	0.0068792	0.0177814	0.000902727	NA
CKAP2	0.000144621	0.0249462	0.000130949	0.511836	0.107032	0.465582	0.0012529	0.797295	0.0895497	2.21056e-07
CHAC1	0.000123209	NA	0.183117	0.878507	0.952306	0.161787	0.00116718	NA	1.16215e-06	0.0725063
CHST5	NA	NA	NA	NA	0.00214413	8.93937e-05	0.00391256	0.00371064	0.0151928	1.45519e-11
CHUK	0.0210202	NA	0.0799618	0.151851	8.9605e-07	8.74419e-06	0.738275	0.0065404	0.195596	2.03272e-10
AX746670	7.20471e-05	NA	0.00186737	NA	1.54227e-06	0.0945642	1.86265e-07	2.45869e-07	0.000152737	NA
CHCHD2	1.81099e-08	NA	NA	0.000891217	0.0394467	0.467972	1.81099e-08	8.25246e-05	4.52763e-06	NA
CLASP1	3.22797e-09	NA	NA	2.05605e-09	0.00115072	0.203198	2.11431e-07	3.22797e-09	0.0402475	NA
CHD4	0.0896401	6.14923e-08	3.25618e-07	0.536042	0.369353	0.021464	0.0896401	0.183318	0.0207809	5.10427e-05
CHERP	8.70841e-09	NA	NA	0.00362615	3.1436e-05	0.0105044	0.56049	NA	6.25322e-07	NA
CHIT1	0.11185	0.00206057	4.29927e-07	0.847156	7.19802e-05	0.375381	0.00826376	0.354092	0.941724	0.000181489
CLDND1	0.00143029	NA	NA	0.0033342	4.67553e-08	0.00315896	NA	0.12485	NA	NA
CHMP4C	0.00232809	NA	NA	0.0224969	0.03747	0.000968625	0.919095	0.391694	0.00222738	0.000299885
CHP2	0.104919	0.000340848	0.800149	NA	0.277755	0.00119547	0.0426164	1.71014e-06	0.588786	NA
CHRM2	NA	NA	1.97747e-09	NA	0.976168	1.83777e-08	0.0120438	2.27374e-13	5.20671e-06	NA
ATP5A1	0.969058	0.00248001	NA	0.214469	0.082547	0.064423	8.14331e-06	0.33815	0.00435463	NA
CLEC4A	0.00956391	NA	NA	NA	0.000726071	NA	NA	NA	NA	NA
CLEC18B	NA	NA	NA	1.15051e-10	NA	0.701209	0.101828	7.11084e-08	5.72504e-08	0.000230445
CLCN3	0.000897357	0.839788	0.114782	2.91038e-10	7.09805e-05	5.82077e-10	5.82077e-11	NA	0.100185	NA
ANKRD11	0.000747929	0.285434	0.00162023	NA	0.0834891	0.044884	6.00409e-13	8.76135e-11	0.984272	2.88113e-05
ALG5	3.84447e-05	NA	0.692047	0.000381447	0.118818	1.51031e-06	0.000323276	0.0446366	0.00709191	NA
CLEC9A	0.320421	4.97677e-06	4.97677e-06	5.75699e-09	0.725389	0.227948	1.08287e-11	2.59388e-06	4.15639e-05	0.208089
CLINT1	NA	NA	0.0462475	0.0449878	0.840555	0.0762314	0.745787	0.000516776	0.00737699	NA
CLLU1	NA	NA	NA	NA	NA	NA	NA	0.00800991	0.0101252	NA
CLP1	NA	NA	NA	NA	NA	NA	0.0127273	0.165859	NA	NA
CLRN2	0.00138162	NA	NA	0.00831832	1.69393e-09	0.00554913	0.862489	0.000721723	0.0176269	0.00554913
CLDN14	4.36987e-05	NA	NA	0.806445	0.000879115	0.0599431	NA	8.09882e-09	0.0196738	NA
CLDN24	0.0276493	NA	NA	0.045875	1.76103e-05	0.015953	7.85845e-06	1.13687e-13	1.1378e-06	0.071134
CLUAP1	5.41948e-05	NA	7.85845e-06	5.0818e-11	0.0919113	6.47576e-05	0.000128803	2.13862e-05	0.00730908	NA
CMBL	1.45816e-06	0.602815	0.000475939	NA	2.91038e-11	NA	NA	0.000359494	4.91855e-09	NA
CMTM2	0.000880576	NA	4.67553e-08	NA	1.55625e-05	5.78832e-07	0.254859	0.0422619	8.34989e-08	0.00180651
CNBP	NA	NA	NA	NA	NA	NA	NA	NA	NA	NA
AIPL1	0.0065404	NA	NA	0.399052	0.159208	0.0294936	0.0489179	2.27374e-12	3.66931e-08	NA
CNGB3	0.0489222	0.000529193	4.67942e-07	3.17814e-08	0.685156	4.4146e-08	2.53833e-07	0.0124123	0.00182077	1.02634e-05
CNNM1	6.54514e-06	NA	3.12639e-12	0.116303	0.696773	1.22213e-12	3.12639e-12	1.39628e-05	4.35934e-07	6.98296e-06
CNOT6L	NA	NA	NA	7.62939e-06	NA	NA	NA	NA	NA	NA
CNR1	0.00888854	NA	NA	0.00185858	0.0022483	NA	0.0520806	0.000236318	0.0200018	NA
ADHFE1	1.51941e-05	2.47514e-06	NA	2.04323e-09	2.46827e-07	0.00593932	0.818364	0.642657	0.0266351	5.3011e-10
CNTN2	0.0641322	NA	0.0414771	NA	0.011532	0.00471185	5.3796e-09	3.79467e-05	0.000201938	3.79467e-05
CNTNAP5	0.915032	0.000670167	0.169227	0.000104434	0.230431	0.748838	0.448248	9.02943e-10	0.795513	0.251058
C22orf29	0.766476	7.35087e-05	4.54747e-13	0.0266935	0.385257	0.0011364	0.000193812	NA	1.5688e-05	0.449571
COBL	0.805328	0.984272	7.10543e-15	3.61741e-10	1.43547e-05	1.2161e-05	1.06581e-14	6.00409e-13	1.06581e-14	1.51641e-05
COIL	0.61471	0.0958157	0.00364891	2.10153e-08	0.725823	6.24475e-07	7.10543e-15	1.85516e-05	1.1113e-05	NA
AK055980	NA	0.00152941	NA	NA	4.47035e-08	NA	NA	0.46984	0.000300899	NA
CALM3	NA	NA	NA	NA	NA	NA	NA	NA	NA	NA
COL18A1	2.21349e-08	0.876065	0.0170592	5.15105e-06	1.21531e-10	0.949341	0.839775	NA	2.00517e-05	6.83633e-06
COL26A1	0.207128	NA	2.86184e-05	5.74489e-06	7.8586e-11	7.93506e-10	8.68492e-07	9.20673e-05	0.000107877	0.0498681
COL4A5	9.34705e-10	0.650042	0.000381725	0.00414352	1.28126e-05	4.67942e-07	0.000263325	1.92113e-09	5.48592e-08	1.39927e-05
COL6A6	0.411915	1.19015e-09	7.26313e-05	7.79049e-10	0.475015	0.00629745	0.39561	7.79049e-10	8.27893e-10	0.685156
CACNG4	NA	NA	NA	0.043827	0.0371485	2.91038e-10	1.38243e-07	8.56991e-07	0.0514609	NA
ATP5I	0.0748692	NA	NA	NA	4.52995e-06	3.26633e-05	1.0252e-05	0.0802028	0.000849485	NA
COLGALT1	0.0622606	2.21349e-08	NA	0.220616	0.171966	1.55751e-11	0.0622606	NA	3.41061e-13	NA
COMMD7	NA	NA	NA	3.19444e-06	0.179124	0.0226545	3.19444e-06	0.00103993	5.00586e-09	NA
COPG1	0.003531	0.0956834	0.000412661	NA	6.9409e-07	1.84136e-07	9.09495e-11	0.00202071	NA	NA
COPS8	0.00953641	NA	NA	0.000583388	0.284213	0.284213	0.0426084	2.76417e-06	1.49012e-08	NA
COQ7	1.42109e-14	0.000696217	6.36773e-09	NA	0.0779819	2.84217e-14	1.98952e-13	0.00527915	0.854449	3.59535e-12
COTL1	NA	0.00324719	1.49012e-08	NA	NA	0.029905	NA	NA	0.00324719	NA
COX4I2	1.94624e-06	0.00347104	NA	NA	0.0258114	NA	NA	0.00016257	0.0164073	0.0584917
COX7A2	0.0747745	0.0473017	0.828663	7.00823e-10	1.98952e-13	0.0391614	0.000231325	0.0201422	0.0125658	NA
CPA5	1.78286e-08	3.79785e-12	1.06581e-14	1.93937e-06	0.0949108	0.000610925	7.10543e-15	0.000120996	3.55271e-15	0.715233
CPED1	0.00539979	0.124903	5.42246e-10	0.234655	0.0168224	4.94474e-06	2.01114e-09	1.44649e-07	0.00406295	1.70405e-06
CPNE2	0.928587	9.68786e-05	4.3201e-12	0.227439	4.54747e-13	8.46967e-10	2.39158e-07	4.15626e-06	0.0120438	0.00186235
CPPED1	3.22797e-09	3.97904e-13	1.42109e-13	7.03758e-05	0.720958	0.948241	0.795082	0.135442	0.00197246	1.08509e-06
ASAH2	NA	0.133992	5.19374e-07	0.000747929	0.156153	0.00482025	3.55271e-15	0.0307928	0.921481	7.10543e-15
CLMN	0.00771476	0.000458084	1.98342e-05	9.26294e-09	0.0446558	0.000166697	0.246704	0.0875194	0.0102354	8.27893e-10
CBLB	3.15494e-05	NA	0.310221	1.53013e-08	0.000374039	0.0117537	2.22216e-08	5.27223e-12	0.000468835	NA
ASS1	0.0874627	6.95545e-08	NA	0.00202071	6.91216e-11	5.09317e-11	7.27596e-12	0.0013167	9.68148e-06	9.20409e-10
A1CF	5.80652e-08	0.0057271	0.000154933	0.0152328	5.44588e-10	0.253953	0.00115072	0.297277	0.16344	0.000651541
CENPW	NA	0.0770005	NA	0.489056	3.20142e-09	0.126644	8.73115e-11	0.0260309	0.000870808	NA
C21orf33	4.40416e-05	0.443733	NA	2.49202e-10	6.45967e-07	0.0165063	0.000755352	1.27329e-11	0.764825	8.20273e-08
API5	NA	NA	NA	0.951526	3.72529e-09	0.00186401	0.0605652	0.583757	0.00087182	NA
ASF1A	NA	NA	NA	0.0078125	0.425781	NA	NA	NA	NA	NA
ATL2	NA	NA	0.350705	3.33821e-07	NA	0.764738	0.0150803	1.01223e-07	1.60944e-07	1.92085e-09
CS	0.2302	3.3473e-06	NA	NA	7.40329e-09	3.3473e-06	3.63798e-11	1.62618e-09	1.59415e-05	0.00304284
AB429224	NA	0.730989	0.00737095	7.49826e-05	NA	0.00225526	0.312333	NA	0.0105108	NA
ACHE	6.45691e-05	1.97431e-06	0.400848	0.480683	0.0637581	0.728911	0.0124375	1.52045e-08	0.000368513	NA
CST1	NA	NA	NA	0.0266418	9.53674e-06	NA	NA	NA	NA	0.000209808
CTH	1.50652e-06	NA	0.0222345	0.000341289	8.56793e-07	0.000535732	0.196782	0.109392	2.40163e-12	0.175505
CSTA	1.16629e-06	0.00362615	2.49616e-06	1.36424e-12	3.93288e-07	0.00972594	1.95541e-11	8.6402e-12	0.155497	NA
CTNNBL1	NA	NA	NA	NA	NA	0.000161883	0.00105938	4.65661e-10	0.238641	NA
CT45A5	NA	NA	NA	0.00152736	0.000407975	0.000668768	0.00693829	NA	7.07805e-08	0.000668768
CTCFL	0.00146418	4.13897e-08	0.00321138	0.591317	7.22926e-05	0.840555	0.00107814	0.00361426	0.00792521	0.000155081
CTRL	2.77121e-08	4.99352e-09	NA	0.745419	NA	6.94557e-08	5.40012e-13	0.267888	0.595682	0.0436569
ARFRP1	0.0667016	NA	NA	0.672075	0.507704	NA	5.96046e-08	0.000162303	0.0451227	NA
C1QTNF3	NA	NA	NA	0.476208	0.931152	0.11185	0.000248168	0.206413	0.03322	0.00487072
GID4	NA	NA	0.68932	NA	0.0019716	4.41074e-05	0.000190288	0.617092	0.089029	NA
CPSF6	NA	NA	NA	NA	NA	NA	NA	0.120209	NA	NA
AP2A1	NA	NA	0.158359	0.00426668	0.954866	0.334075	NA	0.00596813	0.72796	NA
CALCB	1.68598e-10	NA	NA	0.000434451	0.448393	0.000857565	0.147495	3.14344e-10	0.00321036	NA
C9orf43	0.00368281	0.016224	7.8586e-11	0.00181895	1.22213e-12	0.0183738	3.97904e-13	0.0863573	8.72546e-12	2.28922e-08
ANK1	0.327763	4.61604e-11	2.04103e-10	1.3757e-08	3.55271e-15	3.55271e-15	3.55271e-15	5.62252e-10	0.767404	4.86722e-13
ASB9	0.685981	0.412356	1.77636e-14	0.000457313	0.527663	0.112009	0.000167227	5.26121e-11	0.547237	NA
AK056081	0.952984	NA	NA	0.798252	0.210117	0.768005	0.195633	NA	NA	9.53674e-05
ATP5J2-PTCD1	0.0160277	7.38013e-09	1.77636e-14	0.00436128	7.22977e-12	5.26867e-12	0.0179493	0.223292	5.19374e-07	6.00409e-13
FBXO25	NA	NA	NA	0.00017287	0.750927	0.00110355	0.929769	7.68341e-09	0.160046	3.18978e-08
ATP6V0A1	0.412534	0.000452332	NA	0.0368489	0.0165063	0.0014408	0.0725063	0.467972	4.09882e-05	NA
FBXO38	NA	NA	0.461127	2.1555e-10	0.00368281	0.603222	0.00637341	1.28864e-09	0.501734	1.28864e-09
FBXO47	0.0397019	NA	NA	NA	0.117188	5.0818e-11	0.00118594	2.80238e-09	0.028519	0.351007
FBXW12	0.00172478	NA	NA	NA	NA	NA	NA	0.104496	NA	NA
FER1L6	1.45947e-08	2.25724e-06	0.00855715	6.1454e-05	0.000217448	1.63058e-06	7.57049e-10	0.00301012	0.0100816	0.000217448
FCER1G	0.101225	NA	NA	3.60433e-06	0.00111528	0.000163538	1.12649e-05	8.80798e-07	1.24448e-07	NA
FEZ2	8.9525e-09	NA	NA	1.2637e-05	0.92876	0.00347524	3.08812e-08	0.0267368	0.000112468	9.60654e-12
FCGRT	1.30467e-09	3.84813e-05	5.40742e-07	0.00122944	0.140242	NA	NA	NA	4.15626e-06	NA
FCRL3	0.683851	0.917591	0.0101951	0.00248541	0.36472	5.10584e-05	8.6402e-09	0.000707137	3.63798e-12	7.27596e-12
CCDC85C	NA	NA	9.53674e-07	NA	NA	NA	NA	0.320457	0.539189	NA
FGD2	8.749e-09	0.0559597	0.00707561	3.82183e-07	0.816788	0.671023	0.0345095	1.42521e-09	NA	6.80736e-08
FGF16	NA	NA	NA	0.42627	NA	NA	NA	NA	0.0107422	NA
FDX1	NA	0.603311	NA	1.19209e-07	NA	4.42266e-05	5.32866e-05	0.0178703	NA	NA
ARF5	NA	NA	NA	NA	NA	NA	NA	NA	NA	NA
FGF3	0.803988	0.499611	0.00324719	0.0318958	NA	NA	NA	NA	2.04146e-06	NA
FGFR1OP2	NA	NA	NA	0.000827849	0.000338733	0.000744015	NA	1.04308e-06	5.4881e-05	NA
FGL2	5.81785e-07	0.142132	0.226452	0.0351141	0.30078	1.01579e-06	5.04453e-07	5.38876e-11	0.505119	8.44162e-09
FHOD3	0.00141304	0.323103	3.48153e-07	0.000143453	0.0093217	3.50294e-08	0.019975	1.31461e-05	0.480321	0.0168224
ACTR3C	NA	NA	NA	0.0171814	0.00638962	0.728506	0.00485992	0.0973072	0.00168991	0.142906
CCDC127	NA	0.90816	8.39466e-05	NA	1.72804e-11	0.000201791	2.1611e-07	4.1581e-06	0.00492673	NA
CCDC59	0.00134264	8.19509e-06	NA	0.0212012	1.76784e-09	1.76784e-09	0.514812	0.000261722	0.0270156	1.95399e-13
CNDP1	0.247018	0.00194877	9.58408e-10	0.000921293	0.00132545	6.10564e-06	1.58536e-05	0.0564558	3.64325e-05	0.010931
AK056228	0.86516	NA	1.25344e-06	0.118674	0.00358852	0.0387335	0.00740791	0.040374	NA	0.000838172
ALPP	2.70006e-10	NA	NA	0.144224	NA	3.49019e-11	0.0965893	NA	0.000152057	0.00377814
ARL10	0.0248336	NA	NA	3.17222e-05	0.000182808	0.0747261	0.0134176	0.0633956	6.49839e-06	0.569879
FIGNL2	1.02073e-06	0.0662398	NA	1.49012e-08	NA	NA	NA	NA	0.284213	0.582386
C15orf38-AP3S2	0.0380997	0.166797	NA	0.000309739	2.05605e-09	5.3482e-05	3.12639e-12	0.00427739	0.580729	1.83226e-09
ALKBH8	0.00327987	6.17959e-11	7.07487e-11	0.102215	6.46175e-10	0.834973	0.00174999	0.00283967	3.19146e-09	7.37456e-05
CALY	0.01546	NA	0.00433823	NA	0.0105983	0.715133	0.000951774	NA	0.569858	0.000554826
AIF1	NA	NA	0.148469	0.0013852	0.128884	0.0168523	0.000319504	0.412756	1.2417e-06	NA
AGPS	6.36773e-09	NA	NA	0.640682	7.61702e-12	0.618301	2.24466e-09	9.166e-10	0.066028	0.00186916
C1orf127	0.0282662	0.671224	2.86718e-10	6.82121e-13	0.688768	9.07727e-07	2.27374e-13	0.246668	8.09882e-09	1.52218e-05
ATG4B	7.32325e-08	NA	NA	NA	0.010864	0.797639	0.123943	NA	0.151754	0.0512342
CALML3	3.0349e-06	0.834685	0.117482	NA	0.0180979	NA	4.67553e-08	1.18493e-05	0.0490378	NA
CST2	NA	NA	NA	0.0482788	NA	NA	NA	NA	NA	0.141518
C17orf112	0.00487072	NA	NA	NA	1.81899e-11	NA	NA	0.435812	3.54559e-05	0.00791797
ABAT	0.000595306	NA	NA	0.0498681	7.9413e-06	0.522711	1.81899e-11	1.63084e-10	2.47184e-10	2.50111e-12
CBR4	3.61324e-05	NA	3.26048e-09	2.5762e-09	0.00308626	0.000901355	0.0001253	0.52357	0.00661701	3.61324e-05
CCL1	0.0562075	1.12952e-06	NA	0.433286	2.1611e-07	0.0104413	0.00226578	0.887871	0.0948577	3.91083e-11
AGO4	NA	NA	NA	0.838194	4.1008e-05	1.33514e-05	0.000161171	1.33514e-05	NA	NA
CASP1	NA	4.66897e-06	2.02606e-08	0.227948	0.00264343	0.219851	0.00627826	0.954028	0.0398047	1.98952e-13
ASPDH	0.72052	0.200219	NA	0.00571114	NA	NA	NA	4.97885e-06	3.84706e-07	6.25952e-07
ACADVL	0.00593802	0.650042	0.481004	1.12054e-09	1.12188e-05	4.4146e-08	0.000867272	1.09871e-08	0.158723	2.16346e-09
AADACL4	NA	8.70841e-09	0.12494	0.701209	9.88302e-09	NA	NA	1.68711e-10	0.0147137	4.52792e-09
ACAA2	0.285434	1.09068e-12	0.401137	0.0206266	5.14869e-06	NA	NA	0.000986715	0.882456	NA
CCDC86	0.0743386	0.122789	1.58673e-09	0.0781624	6.47049e-10	0.0671404	5.68434e-14	0.0049164	1.58061e-06	0.312892
ASF1B	NA	NA	NA	5.82077e-10	0.0410184	2.79215e-10	0.002737	1.61969e-06	0.12076	NA
CST3	0.489846	NA	NA	0.129353	9.31323e-09	0.262122	1.86265e-09	0.000951774	NA	NA
CCDC30	4.66165e-08	0.000235163	5.79083e-08	1.12054e-09	2.71218e-06	0.000209846	7.79049e-10	7.79049e-10	0.000678918	1.12188e-05
COX10	2.27374e-12	NA	0.318028	1.6119e-10	0.0699896	NA	NA	0.00043851	0.0610659	NA
ACTR3	NA	NA	NA	NA	NA	NA	NA	NA	0.0136719	NA
BOLA2	NA	NA	NA	NA	0.697985	0.0551331	2.01515e-06	0.0160541	2.63029e-06	3.93484e-08
COPZ1	NA	NA	NA	NA	NA	0.0691017	0.0126048	7.62939e-05	6.38962e-05	0.0339851
ANXA4	1.23201e-06	NA	NA	0.000941781	0.0070407	0.00479711	2.58981e-05	1.45092e-07	0.147495	0.000941781
ABLIM3	0.000441516	1.59957e-05	0.000414186	7.27596e-12	0.000642613	0.349918	0.000979019	0.546649	0.785327	1.78567e-07
ACSM2A	0.005323	NA	NA	0.413133	1.4611e-09	6.25322e-07	0.000182836	NA	0.0474549	0.0101086
CAPZA2	NA	NA	NA	NA	2.38419e-07	0.768296	3.57628e-07	0.00064981	0.89957	NA
AMBN	0.214242	4.76015e-08	0.57065	0.000702739	1.38176e-08	NA	NA	9.88551e-08	6.87413e-08	2.64944e-08
AGFG1	0.0214342	NA	0.382132	9.09495e-13	NA	0.000305436	0.375132	0.403596	0.137319	0.00050913
ACTL8	0.0336612	NA	NA	NA	6.36646e-12	0.00261168	6.89761e-09	3.96932e-07	3.96932e-07	NA
COX5A	1.15763e-06	NA	NA	4.04892e-07	0.0370099	6.35698e-06	0.901796	0.887851	0.214076	2.32831e-10
AK056253	NA	NA	NA	3.8147e-05	0.000631332	NA	NA	NA	NA	0.00181568
ACBD6	5.13865e-11	NA	NA	1.58061e-06	0.000751201	1.87583e-12	0.131337	5.01454e-08	6.44815e-09	NA
CLDN15	2.65508e-07	0.315675	NA	0.00377455	2.65508e-07	5.82995e-08	5.82077e-10	1.03519e-08	1.81899e-12	8.95732e-05
COMMD8	NA	0.00212896	NA	1.59415e-05	1.59415e-05	0.547898	3.67004e-06	8.89153e-06	8.89153e-06	NA
C14orf28	0.0421502	NA	NA	NA	0.0135547	0.633827	0.457846	0.156338	0.0421502	5.96046e-08
BMP8B	NA	NA	NA	7.45058e-09	NA	0.020266	0.508296	NA	7.07805e-08	0.0085937
ARF6	NA	NA	NA	NA	NA	NA	NA	NA	NA	NA
ADPRH	3.93523e-05	NA	2.84217e-14	1.74178e-07	1.42109e-14	0.00186916	1.42109e-14	NA	0.789209	4.97626e-08
ANKRD42	0.189289	0.282003	NA	5.41434e-12	4.30262e-09	0.00174999	0.0552492	0.00219471	8.15328e-05	NA
C15orf56	0.1286	NA	NA	NA	NA	0.696386	0.279242	1.59293e-05	NA	0.1286
BNIP2	2.84217e-13	NA	0.243014	0.394568	2.2269e-05	6.77774e-07	1.70291e-06	1.6304e-05	0.893313	0.307509
ACTB	NA	NA	NA	NA	NA	NA	0.147461	NA	0.413086	NA
CT45A6	NA	NA	NA	0.325001	0.100864	0.88151	0.22137	NA	0.000451345	0.392654
COX7B2	0.00138162	NA	0.503452	0.314605	5.00293e-05	2.93912e-06	4.54747e-13	2.31389e-08	5.98515e-06	0.365108
CALCOCO1	3.1436e-05	1.47757e-07	0.0756506	0.664827	0.000979	3.45383e-06	0.000721723	0.543885	0.000931077	0.0131729
C12orf73	9.92764e-06	NA	NA	NA	6.91216e-08	0.87057	0.000385896	0.797889	2.91038e-11	NA
ADRB3	0.0149246	2.13637e-05	3.05929e-06	1.26862e-06	4.4148e-08	0.2228	0.115753	2.83056e-06	0.03747	2.60725e-05
CAMK1D	NA	NA	NA	0.241533	0.624273	0.0226545	5.79166e-07	1.16415e-10	0.00407423	NA
CCL2	7.92629e-06	NA	NA	0.0314683	4.54747e-12	1.00044e-10	0.0314683	0.0545079	0.60783	NA
ALG6	0.00162023	0.0270156	NA	9.77353e-08	0.601096	0.038713	6.00409e-13	1.50365e-06	1.1724e-13	3.78327e-08
ARG1	0.0639596	0.310448	0.0809945	9.88734e-10	0.574902	3.87287e-07	3.58739e-09	0.248265	1.28771e-08	NA
APPBP2	NA	NA	NA	NA	0.000239253	0.583806	NA	NA	0.0691017	0.0646493
COQ9	9.26294e-09	4.3792e-09	NA	1.72522e-08	9.26294e-09	1.30216e-08	5.7212e-07	0.364191	NA	NA
CMC1	NA	NA	0.899515	0.0381294	1.27329e-11	1.27329e-11	0.0682242	1.81899e-12	0.000149783	NA
AK056490	NA	0.00524902	0.0134277	NA	0.267578	0.42627	0.42627	NA	0.067627	NA
CNR2	0.180734	4.21494e-11	0.048571	0.845574	0.000744968	0.000431456	0.01298	2.93714e-06	0.00460543	1.35112e-06
ANPEP	3.14109e-09	0.016006	0.00638121	0.0678598	4.2983e-10	0.000670335	0.00620724	NA	0.0496996	2.3361e-06
CA12	0.000102349	NA	7.93506e-10	0.0539311	5.65271e-05	7.44784e-06	2.84217e-14	3.03828e-11	0.00213749	1.5234e-11
AIFM1	1.94656e-07	NA	3.17452e-07	0.922428	5.68434e-14	0.000519186	0.416121	0.000473475	1.39628e-05	NA
ABCG5	1.36147e-10	0.361901	6.98511e-09	NA	2.42103e-07	2.34479e-13	2.34479e-13	0.772074	2.34479e-13	NA
BOLA3	0.000177909	NA	NA	8.10146e-06	5.00586e-09	1	0.000228134	0.000368657	0.0260864	NA
CMTM3	5.21541e-08	0.00953641	1.49012e-08	NA	NA	9.31919e-05	0.398947	0.0191131	5.21541e-07	0.678179
BPIFB1	0.000542506	0.88286	0.0221369	1.62713e-06	1.73832e-06	0.264023	1.75889e-08	2.10153e-08	6.66493e-05	0.0192054
AK057304	NA	NA	NA	NA	NA	NA	NA	0.0942383	NA	NA
FBXO27	1.09477e-05	7.11414e-07	2.89263e-07	2.5667e-06	NA	NA	NA	2.52796e-07	0.0191806	NA
ATG10	0.106978	NA	0.346458	0.302187	2.45756e-06	0.0222548	9.03482e-05	0.884482	1.74509e-11	4.13897e-08
AK074396	2.30027e-06	NA	0.000388012	0.107569	0.0068445	NA	NA	0.0213157	3.28873e-09	0.00856207
CCL20	1.90621e-06	NA	NA	4.70664e-11	7.30552e-10	0.425813	7.65439e-07	0.133783	0.180025	NA
CBX5	NA	NA	NA	NA	NA	NA	NA	0.00195312	NA	NA
C15orf57	7.27596e-12	NA	4.99497e-06	NA	1.379e-06	0.000186423	1.84082e-09	1.5301e-06	0.101706	NA
ARFGAP1	0.302718	0.131299	0.0304801	NA	NA	0.291127	2.95409e-07	8.6402e-12	6.84789e-07	1.35886e-05
ART3	0.139295	7.22977e-12	0.184222	0.00288938	0.219517	3.55271e-15	1.77636e-14	0.00355808	1.78399e-07	0.418033
CSTB	NA	NA	NA	NA	1.02445e-08	0.173595	8.14907e-10	NA	NA	NA
ARHGAP17	0.196344	0.0802821	NA	NA	0.0750025	5.15726e-05	0.340731	0.00931281	5.86081e-08	0.000759297
CALML4	0.0026081	0.448393	2.29137e-06	0.00177285	2.87628e-11	0.000274113	0.191182	1.00044e-11	6.09361e-11	0.000986629
ATF1	NA	NA	NA	NA	0.893285	NA	0.17178	0.000121229	0.067553	NA
COPZ2	NA	NA	0.258124	0.000414037	0.882806	0.314928	0.0667966	1.02431e-06	2.32694e-05	NA
C11orf57	NA	NA	NA	0.128103	0.149902	4.93281e-06	0.420212	0.142349	5.72327e-08	5.45697e-12
AQP3	7.79983e-09	NA	1.44167e-06	0.622495	0.988109	0.464246	7.65216e-05	1.01863e-10	0.601519	NA
CCAR1	0.522044	NA	2.58819e-09	NA	2.23591e-06	0.000182808	3.60935e-05	0.00895935	0.506561	0.261802
CT62	7.80711e-05	0.508867	NA	0.0160039	0.0743404	0.797889	4.40041e-06	NA	3.194e-06	NA
C17orf47	2.89191e-11	0.854449	2.78285e-09	2.10449e-10	7.81597e-13	3.52518e-05	9.9476e-13	1.49848e-05	2.22216e-08	5.16081e-05
ADCY3	0.0071127	NA	0.790099	2.30053e-08	0.00394152	0.165131	0.00941395	2.69438e-11	0.00119746	0.0169651
ATG4C	1.26996e-08	0.745419	0.664994	0.487995	0.0189479	0.000119763	2.49095e-07	0.000340841	1.08509e-06	NA
C11orf80	0.00457578	0.00765883	0.130073	0.184725	0.433812	0.0641322	0.00339827	7.1355e-10	NA	0.000805161
C12orf74	5.80652e-08	3.60475e-09	0.113747	3.97904e-13	4.20897e-10	1.54984e-08	4.80327e-12	6.92717e-07	2.84217e-14	7.8586e-11
ACVR1C	0.0616498	5.60817e-06	NA	0.957116	1.83777e-08	1.07421e-06	3.38429e-05	0.00518989	0.0190173	0.491318
ANGPT2	0.00332185	NA	NA	0.0504177	9.09495e-13	3.18323e-12	4.11092e-10	0.247715	0.00265798	8.70841e-09
ABHD8	0.000941172	NA	NA	NA	0.23705	0.000149783	2.53547e-07	NA	2.10478e-05	NA
AMN	0.9403	NA	NA	0.00793844	NA	0.291376	0.652813	NA	0.0463312	0.0357244
CADM2	0.000269264	NA	NA	0.0919584	0.0797595	0.369238	0.00351083	NA	0.029064	NA
CCDC129	3.01286e-07	3.60788e-10	2.53177e-05	0.39957	9.10251e-10	3.60788e-10	0.0358042	0.0112038	1.79755e-09	3.60788e-10
AMTN	0.354075	NA	4.92208e-08	1.45743e-06	0.00687337	2.28055e-08	0.39561	7.79049e-10	9.38412e-08	4.91907e-09
C9orf84	2.06417e-07	9.80618e-09	6.45068e-08	0.00164973	1.82458e-08	0.487033	7.79049e-10	7.79049e-10	7.79049e-10	1.23058e-08
ARL11	0.0320899	0.529874	NA	1.30467e-09	1.34926e-07	0.346756	0.0120438	1.1582e-08	0.140242	4.10137e-05
ASGR1	0.00060329	NA	NA	0.000131546	4.52763e-06	0.714597	0.00159808	0.00305158	1.6344e-07	2.36232e-08
C16orf95	0.226508	0.724554	0.973493	0.333566	2.67371e-06	0.774995	2.63907e-05	2.00089e-10	0.000298181	1.27835e-06
CCT4	NA	NA	0.330293	0.797889	5.59695e-05	0.0535519	0.000584505	5.52973e-10	2.91038e-11	NA
CCDC105	0.368578	0.119003	0.00941395	0.00436128	0.00407727	1.60307e-06	3.0898e-11	NA	0.0134784	0.044884
ARNTL	0.00064207	NA	0.00064207	NA	NA	1.835e-08	4.67553e-08	4.36557e-11	1.31549e-08	NA
C10orf114	0.17135	0.368211	NA	2.44984e-05	2.27374e-11	9.09495e-13	9.09495e-13	NA	0.17135	NA
ADD2	3.51033e-07	NA	0.710613	0.418265	3.8975e-09	0.748838	0.0156634	7.07487e-11	4.81598e-06	NA
CNOT6	0.258124	NA	NA	0.013288	0.000870808	0.0621176	2.91038e-11	0.278554	6.28323e-07	NA
CLDN25	0.000600494	0.0922714	2.92221e-09	0.028404	0.188314	NA	NA	0.000829006	5.86291e-07	0.179687
BOLL	0.000470466	0.646237	0.0608448	0.0428979	NA	1.84082e-09	1.57634e-07	1.3469e-05	7.27596e-12	NA
CPSF7	0.00487017	NA	NA	0.0751859	0.000106214	0.509729	3.49246e-10	2.20537e-06	0.00813031	0.000268389
CA6	0.236155	1.93309e-06	0.339632	0.373767	0.000374768	0.845574	0.626092	0.00382412	0.244943	0.0391614
CP	0.000431975	2.12321e-07	0.0961543	0.988782	0.000180609	2.51585e-05	3.56628e-06	0.000144148	1.10918e-08	2.12321e-07
BMPER	0.0279225	4.02963e-07	0.379652	0.00871319	3.22797e-09	0.000374768	0.00240827	0.0460599	8.52651e-14	0.0227247
CD2AP	0.00806603	NA	0.128844	2.19897e-06	0.0109547	0.363313	6.14738e-09	2.62376e-09	8.76135e-11	6.00409e-13
C11orf94	0.638033	2.20497e-07	NA	0.159208	2.60934e-09	0.000685358	0.028534	0.166826	1.63497e-07	NA
CSTF1	NA	NA	NA	NA	NA	NA	NA	NA	0.0922852	NA
COX7B	NA	NA	0.000634849	0.993549	4.07454e-10	1.16415e-10	7.73977e-05	0.000838172	0.839788	0.00266747
BMP15	0.580729	0.43509	0.00316285	0.000154933	1.54984e-08	NA	NA	0.0766136	0.0248417	2.05605e-09
ANKRD1	4.02196e-09	NA	0.277458	4.99352e-09	0.000163015	1.17344e-07	2.50111e-12	0.00101191	0.00222455	0.0271236
CTNND1	0.156336	0.893313	0.583598	1.74509e-11	0.00510532	0.364053	9.9696e-09	0.00262809	3.97904e-13	NA
CASQ1	8.70841e-09	0.00016257	0.345617	0.00681126	7.66295e-09	0.00681126	8.70841e-09	0.151851	0.457066	1.33428e-07
CARHSP1	NA	0.00324719	NA	0.0262309	1.87904e-05	0.00423153	0.122534	1.49012e-07	0.32422	NA
CD209	NA	NA	NA	NA	NA	0.00231934	0.241211	0.00012207	NA	0.000244141
BUB1B	0.818364	1.38176e-08	0.00406636	0.00560805	0.000890888	0.0286183	1.04967e-08	2.72776e-07	2.31499e-05	0.291647
CCNDBP1	4.17583e-08	4.97677e-06	NA	NA	0.240479	7.71994e-06	2.22216e-08	0.846231	4.68958e-13	2.26871e-06
CCL3L1	NA	NA	NA	1.86265e-07	7.45058e-09	NA	NA	NA	NA	3.99351e-06
COX5B	0.00862706	0.000172795	0.322583	0.153862	0.000968625	2.62492e-07	8.09853e-05	1.13187e-09	1.48685e-07	0.000163285
BC043578	0.0171578	NA	0.183117	0.192196	0.153789	0.00026392	1.81899e-12	0.00305158	0.994698	NA
BC033961	0.000288144	NA	NA	0.197235	0.0359803	0.0714102	0.52939	0.00145977	3.91083e-11	NA
BC016978	4.07454e-10	NA	0.000414037	NA	2.32694e-05	0.00665747	4.07454e-10	0.0145919	0.000714875	2.03727e-09
CCDC14	2.43548e-09	0.179659	1.22587e-05	3.91742e-05	0.984597	0.692264	2.56697e-05	0.00235964	1.92113e-09	0.00576533
CBX6	6.03568e-05	NA	0.000684494	NA	9.31323e-09	NA	NA	0.0912939	0.110452	NA
ATP5B	NA	3.36292e-06	NA	0.0173305	1.45519e-11	0.00202583	2.87139e-05	0.00239932	4.03204e-07	1.60071e-09
CAPN11	1.0338e-07	0.850878	2.35218e-09	0.787679	0.658294	7.10543e-14	7.10543e-14	3.5706e-05	8.95994e-12	0.492167
ASIC4	0.280897	NA	1.14917e-08	0.829844	0.352295	0.000213451	4.66897e-06	0.00586021	0.000512526	4.5597e-08
ACTR5	3.15615e-07	4.14215e-07	2.27374e-13	0.0144068	7.50333e-12	1.25056e-11	0.00213058	0.00373574	2.23591e-06	1.63732e-07
CCKBR	0.0671404	NA	5.51412e-08	NA	0.00455699	0.00334099	3.76997e-06	0.823111	0.0348753	0.00737699
BBS10	9.9476e-14	7.68125e-09	7.10543e-15	0.296011	0.051355	0.111261	0.00245303	8.29041e-06	2.29531e-08	3.80851e-12
CMC2	9.61954e-05	NA	NA	NA	NA	0.0552396	4.99189e-07	0.175666	0.000118391	0.749841
C15orf59	0.279832	0.187036	NA	0.872225	7.90806e-10	0.208958	0.495556	5.33881e-05	0.213552	0.673854
AIP	1.58198e-08	NA	NA	0.153789	0.000479453	0.836755	3.81301e-05	0.153789	0.0513997	2.67371e-06
CLUH	0.35911	0.582157	0.292704	4.22971e-07	1.60646e-09	0.90778	0.231304	0.00771476	4.92208e-08	1.86041e-07
CCL3	2.82095e-05	1.08287e-11	1.94689e-12	0.0798224	2.0426e-07	0.829844	1.33136e-05	0.709703	NA	9.38201e-11
CTSL1	NA	NA	0.000781945	NA	8.87085e-08	0.00459092	0.624273	0.196474	NA	NA
AK311291	0.0246456	0.0413633	0.000495408	0.000118391	3.46359e-06	0.00269635	9.31323e-10	0.399205	NA	NA
CTU1	NA	NA	NA	0.0415251	NA	NA	NA	0.151072	0.846232	NA
CUL3	NA	NA	0.130859	NA	NA	NA	0.375	0.00195312	NA	NA
CWC15	NA	NA	NA	0.501587	NA	NA	NA	NA	NA	NA
CXCL10	NA	NA	NA	1.45519e-11	0.00365302	2.54037e-06	0.0695408	0.00796124	5.80279e-07	NA
CYB5B	3.14787e-07	0.202253	NA	2.96131e-08	0.361668	0.928741	0.473451	0.117482	0.00351797	NA
CXCL5	NA	NA	NA	0.862489	0.487725	0.159208	0.028534	1.63497e-07	2.29864e-06	NA
CXCR7	0.928508	2.27926e-05	4.52746e-09	0.00010859	0.0214342	NA	NA	0.211179	1.61969e-06	0.625926
CXorf48	NA	NA	NA	0.137283	NA	NA	NA	NA	NA	2.86102e-06
CXorf66	2.49095e-07	0.000119763	1.98952e-13	0.000969116	3.97904e-13	0.610805	2.84217e-14	0.0103132	0.0207631	2.84217e-14
CYBRD1	0.581768	NA	NA	0.357792	0.143863	2.39133e-07	0.0271595	6.38524e-05	0.0598911	1.28466e-11
AK091593	4.11092e-10	NA	NA	0.174708	0.000243993	NA	NA	8.6402e-12	0.0991904	NA
CPZ	NA	0.643775	0.928741	NA	0.0011257	NA	NA	2.91038e-11	0.202253	0.00917164
CRB2	1.60646e-09	0.530356	0.536701	5.21277e-09	7.49509e-06	2.79542e-05	2.58371e-09	2.16225e-05	2.03879e-09	0.0270635
CREB3	9.57368e-10	NA	NA	0.184222	0.797704	0.000183144	0.000339743	0.00646418	8.88178e-14	2.69438e-11
CREM	0.5665	NA	NA	0.000558521	5.04766e-07	0.154154	3.25763e-07	0.809191	3.63798e-12	NA
CRISP1	0.00203757	0.0352342	0.000590977	0.537762	9.68786e-05	0.000621568	0.0922874	0.00117271	NA	NA
CD40LG	NA	NA	NA	0.00406143	7.95808e-13	2.89981e-09	5.68434e-14	0.538281	2.84217e-13	0.737334
CRMP1	0.000476979	0.491065	2.90159e-06	0.691783	0.00125321	0.000355371	0.0624893	3.72529e-08	0.0356175	3.20142e-09
CRTC2	5.44588e-10	NA	NA	0.00382412	0.0234126	5.09543e-07	4.71402e-07	NA	6.18172e-10	4.40959e-06
CSF2RA	0.735352	NA	NA	NA	NA	NA	NA	NA	NA	0.30542
ASCC1	2.13302e-07	0.0037582	NA	0.000684967	4.311e-10	3.51365e-06	2.10889e-11	7.99525e-06	0.00510532	1.58673e-09
CYP4A11	NA	0.00637341	0.879597	0.0142942	0.0167401	0.000411747	0.00397023	0.0380997	0.0331446	1.81899e-11
CD226	2.60969e-07	0.0784903	6.17959e-11	0.545005	0.0767305	NA	NA	0.955433	0.00449955	0.00294446
CMTM4	0.0148134	NA	NA	NA	9.09495e-13	2.72848e-12	0.000123247	NA	9.09495e-13	0.857576
CSMD1	0.896695	NA	1.25635e-06	0.126967	0.302373	0.803445	0.022054	0.356447	1.98952e-13	3.40414e-05
CRYM	6.9409e-07	NA	NA	0.00471942	0.00716162	1.56249e-06	7.89078e-08	0.335977	2.57416e-05	NA
CYP4V2	0.0162034	NA	0.0202648	8.78259e-08	0.376081	NA	NA	3.75655e-08	4.13897e-08	5.68434e-14
ANKRD34A	7.09491e-07	NA	NA	0.159382	4.10773e-08	0.000406905	0.0410184	3.03455e-05	9.05584e-09	0.0545079
CRYBB1	0.00571373	NA	NA	1.48066e-08	0.00873066	NA	NA	0.00240453	0.000414186	3.10743e-05
CSNK1E	6.55651e-06	NA	NA	0.725741	NA	NA	NA	2.38419e-07	NA	NA
CYSLTR2	1.65683e-07	0.0195173	9.92095e-11	0.790099	6.17202e-05	0.0130896	1.13854e-07	4.61604e-11	0.000386253	3.55271e-15
CYP11A1	0.433992	0.0936932	NA	4.17583e-08	4.48736e-10	9.38201e-11	2.89191e-11	1.85141e-06	2.70006e-13	9.8617e-06
CYP21A2	2.27374e-12	NA	NA	0.0273726	2.87921e-07	0.026503	0.00478597	2.17759e-07	1.25056e-11	0.0767629
CYP2A7	NA	NA	NA	0.158277	3.63798e-11	NA	NA	1.4158e-06	0.745698	0.0773786
CYP2J2	6.90764e-08	0.0488863	NA	0.0240726	NA	0.0351141	4.69491e-07	4.96362e-08	0.531541	9.73444e-13
COMMD9	0.00438616	0.866861	NA	7.99525e-06	4.33147e-11	0.00592671	3.04681e-11	3.75655e-08	0.0196361	0.286582
D2HGDH	1.03519e-08	0.000634094	NA	NA	5.82077e-10	0.0072358	0.0824757	NA	5.82077e-10	1.03519e-08
ASTE1	0.0495601	0.484975	1.10918e-08	6.39384e-05	3.05309e-09	7.95257e-06	0.000890888	1.82499e-07	3.67421e-07	2.25411e-08
ACTC1	NA	NA	NA	NA	NA	NA	NA	NA	NA	NA
DDX56	0.180734	0.0926586	3.89377e-12	0.0804	0.454539	0.0804	0.16344	4.71327e-06	0.173663	NA
DACT3	NA	0.12973	3.05176e-05	0.104584	NA	NA	NA	NA	0.00628662	NA
DEDD2	3.96932e-07	NA	NA	0.00853494	2.53422e-08	0.00038445	0.00637837	6.00448e-09	3.25632e-05	0.0512342
DAP3	0.00434659	0.0552492	3.05533e-13	0.0123184	2.11587e-06	0.0716399	0.00236405	0.142132	0.000497964	3.90799e-13
DAW1	5.00371e-07	0.0154234	0.00129862	0.559202	2.35332e-11	0.34502	2.80238e-09	2.17801e-09	2.35332e-11	0.363174
DBF4B	0.000302191	1.87418e-05	5.49646e-05	0.0704403	0.184738	0.146148	3.63798e-12	5.09317e-11	NA	1.62618e-09
DEFB107A	NA	NA	NA	6.38962e-05	0.527059	0.000107646	1.19209e-07	0.276815	NA	3.016e-05
DBP	0.235917	NA	3.20375e-07	7.96467e-06	0.507584	0.000716209	0.0533774	0.00186737	0.0263567	NA
DEFB119	NA	NA	NA	0.00796124	9.96806e-10	5.51736e-08	7.27596e-12	2.06083e-05	7.24736e-07	1.57634e-07
DEFB132	4.02145e-06	0.246214	0.000772963	0.340299	0.00879817	0.476751	0.0205117	0.00828407	0.0708117	2.31294e-06
DCAF13	0.000180055	3.1234e-06	7.80295e-09	0.0313437	0.032894	0.946126	0.568987	0.000961963	7.8744e-05	1.03661e-06
DEK	0.000100382	0.00016257	NA	1.2639e-05	2.39144e-05	0.371752	0.10452	0.00254038	0.00183898	NA
DCAKD	0.00424445	1.81899e-12	0.264874	4.09882e-05	1.27329e-11	0.920592	3.14014e-07	0.665551	2.54659e-11	1.81899e-12
DENND4C	2.94954e-08	0.101909	0.000361637	0.000194579	1.0173e-06	0.0279435	2.62239e-05	0.0726507	1.51941e-05	4.28558e-05
DCHS2	0.490855	0.184725	5.3011e-10	2.34763e-07	1.28453e-09	0.0682823	3.86006e-07	8.91465e-08	3.05309e-09	2.72327e-09
DCP1B	0.184347	0.558629	8.28985e-08	1.08509e-06	0.580729	2.40038e-05	1.45062e-09	0.664994	6.18172e-10	9.1319e-11
DCTN4	NA	NA	NA	2.32831e-10	3.45288e-07	0.00043834	0.0178161	0.20751	0.00075932	0.00548445
DEPDC7	5.16081e-05	NA	NA	2.12076e-06	4.26326e-14	8.31945e-08	3.93523e-05	0.00264343	0.129749	NA
CCL21	NA	0.397424	0.0171578	0.0725063	0.00010101	0.0381294	0.0115369	0.00826376	0.675257	NA
DEXI	NA	NA	NA	NA	0.000851631	1	0.0141659	0.33766	0.00710106	NA
DCX	0.11945	0.000980085	1.4957e-06	0.340299	0.598773	0.0227867	4.97792e-07	0.321715	9.05464e-05	0.000334546
C14orf2	2.91038e-10	NA	NA	0.916287	5.82077e-11	1.16415e-10	1.16415e-10	0.0781509	0.740157	NA
DGKI	5.61373e-05	NA	NA	0.0386314	0.0054029	1.64e-08	2.06497e-06	0.261802	0.00302236	1.90621e-06
DGCR2	8.8005e-08	0.258127	NA	9.77766e-08	0.0567981	0.00052719	0.921163	0.950679	0.0225254	0.00899817
CTAG1B	NA	6.10352e-05	0.00012207	0.120544	NA	NA	NA	NA	NA	0.000427246
DHH	NA	0.109432	NA	NA	0.000110582	0.177193	5.58794e-09	NA	0.0196608	NA
DDI1	NA	1.06144e-06	4.56595e-11	7.25666e-06	1.29157e-09	0.0129195	1.42109e-14	0.00245012	0.172129	1.42109e-14
DLST	NA	NA	0.184347	0.391589	2.1555e-10	0.014757	2.82995e-10	3.89377e-12	1.17344e-07	NA
DHRS4L2	NA	NA	NA	5.14463e-06	NA	NA	NA	0.32847	5.14463e-06	1.59778e-05
DDRGK1	3.04681e-11	NA	2.83846e-06	0.0001253	2.83846e-06	4.33147e-11	0.00232538	1.13687e-13	0.0654316	0.099689
DDX17	NA	NA	0.00779616	2.56114e-08	1.53668e-08	0.000364992	5.9749e-06	2.56114e-08	0.0837109	NA
DDX27	0.0256185	NA	0.0256185	0.363313	3.55271e-15	0.0206266	0.00020964	0.00970598	3.03539e-05	4.86722e-13
DDX46	NA	NA	NA	0.852741	NA	NA	0.00547361	0.0038356	0.0842443	NA
DMC1	0.00167876	NA	NA	3.57395e-08	0.0327721	0.0299444	NA	NA	3.84171e-09	NA
C16orf80	NA	NA	NA	NA	NA	NA	NA	NA	NA	NA
DHX29	0.000402432	0.107934	0.000251882	0.000155452	0.00646936	0.0433852	0.0552539	0.616033	0.0253798	5.3011e-10
CAPZA3	0.0408248	0.82635	1.94355e-06	0.0874476	1.16415e-09	2.32831e-10	0.129308	0.0463934	0.133758	0.488181
DMRTA2	0.00017778	0.875446	0.269906	0.00154797	NA	0.29507	0.803368	0.803368	0.431945	0.203179
DHX57	0.0119809	0.000476849	NA	0.0071127	1.2855e-05	0.952841	9.77353e-08	0.10975	0.0151353	0.0471136
CTSA	4.8476e-07	0.174485	NA	5.04222e-10	2.11412e-08	5.60579e-09	2.27374e-12	1.32433e-07	0.184222	0.664338
CLDN16	0.000105054	4.57305e-06	NA	0.547237	1.63606e-08	0.0112879	6.73748e-09	0.406724	2.4907e-06	0.642966
DIEXF	2.28297e-11	2.13163e-14	0.277433	2.18137e-12	1.77636e-13	0.000256362	0.0209215	3.02889e-07	7.10543e-15	7.10543e-15
DIRAS1	NA	NA	NA	NA	0.00391769	0.0123596	0.650749	3.8147e-06	0.418041	NA
DNAAF1	0.00021205	0.480683	5.13865e-11	9.276e-07	0.102074	0.281501	2.02658e-09	0.247616	0.112062	5.68434e-13
DISP2	NA	0.044884	0.00885282	0.37389	0.0169651	2.21304e-05	0.000662722	9.55255e-05	0.0023353	0.0242832
DNAH3	4.09008e-08	0.323103	0.000284404	0.0600293	0.00014882	6.44913e-10	3.60788e-10	0.332103	0.0983501	0.446999
DKFZp686O16217	0.000456734	0.000199499	2.73172e-07	NA	0.912612	NA	NA	0.000337161	9.06552e-08	1.13687e-13
CSF2RB	0.560722	0.00361426	1.35003e-10	0.553193	0.0781624	3.63798e-11	1.35003e-10	0.000823185	2.89981e-09	0.0029655
DNAJB13	NA	0.771326	0.494767	0.0515803	0.184708	4.04355e-06	5.68434e-14	0.00308626	0.0559022	0.884482
DLGAP1	0.0651811	NA	0.000228393	0.96664	2.27374e-13	NA	NA	6.98037e-11	0.000204443	0.282939
DNAJB9	NA	9.09495e-13	9.09495e-13	9.39666e-07	1.24601e-10	1.81899e-12	3.4929e-05	2.30102e-10	0.0020585	NA
DLD	0.00444481	0.183117	0.170088	3.87518e-07	0.000205904	0.00110652	2.36232e-08	1.64437e-09	0.868033	NA
ACBD7	NA	NA	NA	1.42423e-05	0.000147277	0.000234263	2.32831e-09	4.65661e-10	0.0497694	1.39698e-09
DNAJC30	0.00129862	0.339097	4.57032e-09	0.741897	4.23483e-10	1.13687e-13	0.00124113	3.54117e-05	0.000108851	0.147495
DNAJC19	0.799773	0.0254226	NA	NA	2.09808e-05	0.286143	NA	2.38419e-06	NA	NA
CATSPER4	8.33465e-05	NA	4.54747e-13	1.9403e-05	4.52792e-09	4.54747e-12	2.27374e-12	0.00102913	NA	4.54747e-13
DNAL1	NA	NA	NA	0.000145091	NA	NA	NA	1.86265e-09	NA	0.946101
DNER	0.0270156	0.165131	0.28995	0.0249433	0.000842969	0.0748297	8.76135e-11	0.00202089	6.89631e-06	0.471122
COX7C	NA	7.45058e-09	NA	NA	7.45058e-09	0.000105701	0.109252	7.20471e-05	0.00762919	NA
CCR9	0.363174	NA	8.17918e-05	1.47713e-09	0.00048005	0.866965	0.598826	0.369353	0.000413162	NA
DNMT1	1.42109e-14	NA	0.498385	0.011386	0.0121317	0.546258	1.94689e-12	0.0117537	0.000726854	7.81597e-13
DOC2B	0.859573	NA	NA	NA	NA	NA	NA	NA	NA	NA
AGAP2-AS1	2.84217e-12	0.92178	NA	0.0656959	0.00479711	0.000108851	6.52335e-10	0.750653	0.045875	5.68434e-13
DOCK8	0.00069009	0.00110871	0.0669052	1.01811e-06	0.027738	5.04222e-10	3.61741e-10	0.0256185	0.0350052	0.000126787
ENTPD4	1.42109e-12	0.00473368	0.00159528	0.00792521	0.0413775	4.31265e-05	0.622642	0.000172287	3.20682e-05	4.91742e-07
EP400	5.34883e-07	1.11239e-05	0.0765116	0.176255	0.000316039	0.0811635	0.336663	1.29087e-08	0.613254	2.01114e-09
EPC1	0.0620021	NA	NA	1.68711e-10	0.000585985	0.296886	0.204434	1.63497e-07	0.191282	NA
FIGN	8.66703e-06	NA	NA	0.00365302	0.00873066	0.380559	0.189174	3.25235e-09	0.199218	NA
CTAG2	NA	NA	NA	NA	NA	NA	NA	NA	NA	0.00195312
DEFB107B	3.36766e-06	NA	NA	4.69759e-06	0.594001	0.000194684	3.72529e-09	0.0963318	NA	4.69759e-06
CSTF2	NA	NA	NA	9.05584e-09	2.79215e-10	2.53422e-08	6.45272e-05	NA	1.81899e-12	NA
CCDC15	0.648215	0.0110283	2.22216e-08	0.701905	0.211959	0.733275	9.83558e-08	8.58053e-09	4.97626e-08	3.43866e-09
CCNA1	1.4525e-06	NA	3.40414e-05	0.203198	6.41912e-07	0.000744968	2.88787e-09	1.98952e-13	1.15983e-05	0.00115072
CXorf49B	NA	NA	NA	0.0110453	NA	NA	NA	0.00793844	0.000282288	2.98023e-08
ANO3	0.140242	5.75255e-11	0.378515	1.00142e-05	0.000228393	0.0100241	0.10747	2.27374e-13	1.3776e-06	NA
ADI1	7.09805e-05	0.877899	5.82077e-11	7.73977e-05	3.72529e-08	0.00534474	1.2049e-08	0.522282	0.030007	1.47265e-08
CTAGE5	0.805328	0.0684334	0.00380981	0.0853129	0.495838	5.87423e-05	0.737448	0.0200654	3.38551e-06	0.453031
CCDC60	0.140951	5.74299e-05	0.733275	5.20103e-09	3.37828e-06	3.55271e-13	1.42109e-14	0.0050971	0.00546691	0.588995
C11orf95	0.0268022	NA	0.375596	6.47576e-05	1.44252e-06	0.0639596	1.68359e-09	1.68598e-10	0.0101567	0.690081
ARHGDIG	9.17498e-09	NA	0.313835	NA	3.63798e-11	1.48066e-08	2.06083e-05	NA	3.64797e-05	0.000122224
ABHD16B	0.614744	1.26093e-06	1.794e-07	NA	NA	4.13897e-08	0.000163476	3.40714e-08	2.02658e-09	1.36988e-08
DAD1	NA	NA	NA	NA	NA	NA	NA	NA	NA	NA
CMC4	NA	NA	NA	1.50257e-06	NA	0.360497	2.32831e-10	0.0483821	0.000368657	0.21499
ARSB	2.22242e-07	NA	4.9738e-14	0.303777	7.29882e-07	0.000386253	0.00407727	0.00806603	0.242851	NA
AMOTL1	0.911015	NA	0.00850877	1.26088e-07	NA	0.831823	2.44427e-12	5.68434e-14	0.000273507	0.00262809
FEZF1	0.211179	NA	NA	0.114582	3.4929e-05	0.00153441	0.000148646	0.000305436	8.56228e-07	NA
COL27A1	7.79216e-07	0.00303371	4.13964e-09	3.60788e-10	0.0466062	3.60788e-10	0.256874	6.08744e-10	0.0486499	4.08417e-05
AK3	NA	NA	3.63798e-12	6.86325e-06	NA	1.09139e-11	0.0561791	0.00389378	0.075008	NA
ATF2	0.00879817	0.0165329	NA	NA	0.00879817	0.00294741	0.000195071	0.00105938	0.0174603	NA
ACOT4	0.894311	0.00758637	3.75167e-12	2.00517e-05	0.000115162	0.369353	1.2941e-09	0.025977	6.52335e-10	NA
DOCK10	0.436114	0.106663	0.0012833	0.695515	2.12157e-09	0.000590646	0.000223441	0.378298	0.045367	1.35003e-13
BZRAP1	0.000100132	0.000995597	0.39561	0.0379444	0.000728433	0.384959	0.499212	0.892497	0.671023	0.000568486
CLCN4	NA	NA	NA	0.357853	0.814777	0.149366	8.7209e-05	6.29574e-07	0.00011047	NA
ARG2	NA	0.000249561	0.0322442	5.61817e-07	0.000628877	0.0956834	1.89866e-06	0.101491	4.403e-06	NA
CTU2	1.08002e-12	0.0905809	0.00945449	NA	0.0348753	0.0319589	0.00273654	1.13687e-13	2.28624e-09	1.42109e-12
ASB16	3.38551e-06	0.859168	NA	NA	5.87423e-05	0.10975	0.00466272	0.00781775	NA	4.51784e-10
BRD8	0.0111229	NA	NA	0.0725725	0.238916	7.26313e-05	0.0205153	9.87003e-07	4.82326e-05	4.62753e-05
FBXO48	NA	0.0154582	NA	3.96924e-08	3.60935e-05	0.359255	3.18323e-12	8.43556e-11	2.58819e-09	0.00562358
DEFB108B	0.893212	0.559958	NA	NA	NA	NA	NA	0.00165987	NA	0.0326698
CASC4	0.106941	NA	NA	0.00511896	8.88319e-05	0.000201992	8.94561e-07	0.0134646	0.100786	6.95667e-09
BC017347	0.0263119	0.807465	3.63798e-11	5.82725e-05	0.273813	0.00146592	5.09317e-11	0.00571373	0.0512329	NA
CPA6	NA	NA	8.29149e-05	0.253479	0.773105	0.0744026	1.02864e-09	0.193113	0.797295	1.84617e-08
AADAC	NA	NA	NA	NA	0.491318	0.0599431	0.806445	0.00685024	2.13637e-05	1.7244e-09
DHRS4	NA	NA	NA	4.48234e-06	7.62445e-05	NA	NA	0.218227	0.760512	NA
BST1	1.31093e-06	0.0377435	6.11067e-13	0.421705	0.0110283	3.9293e-11	1.42109e-13	9.46443e-09	0.000159592	0.00101956
AGXT2L2	0.928587	NA	NA	1.0748e-05	1.83777e-08	0.385071	0.0032917	1.34926e-07	0.0183796	2.43062e-10
CARKD	4.14948e-06	7.95808e-13	0.000354862	0.000260132	2.58981e-05	1.78701e-08	1.97701e-10	0.0188416	3.3622e-08	4.56224e-08
C16orf82	0.543709	NA	NA	0.00334469	0.18722	0.0589721	0.00113298	0.000304151	0.0605983	0.000644151
DFFA	0.000490237	2.96201e-06	4.48736e-10	0.0186393	NA	0.119237	0.00218382	1.98183e-06	0.168801	0.000151937
CABP1	NA	NA	NA	NA	NA	NA	NA	NA	0.579056	NA
C14orf37	0.144938	0.00089783	0.170448	0.0284305	8.27893e-10	0.0238916	7.79049e-10	5.79083e-08	0.00453881	2.24402e-06
ARL2BP	0.536909	NA	NA	0.294598	1.49012e-08	2.38046e-05	0.0280502	4.76837e-06	0.362001	NA
CDC25C	2.27374e-13	NA	0.299515	7.5178e-06	1.01636e-10	0.0534957	0.498909	9.12883e-05	NA	0.102208
CD74	0.00719383	0.0203692	NA	NA	0.24476	0.0528805	0.465582	0.0836071	0.000118474	0.00245012
ATG12	NA	0.0136243	NA	0.237349	NA	0.977133	0.709275	0.472737	1.48066e-08	3.63798e-11
A2ML1	1.18143e-08	1.14687e-09	3.23688e-06	1.18143e-08	0.00138841	3.82711e-06	0.581124	1.0816e-05	NA	9.16152e-08
ABI1	NA	NA	0.000668774	5.06116e-08	2.03727e-10	3.63953e-05	0.000714875	1.45519e-10	0.000334734	NA
BLOC1S1	1.94355e-06	NA	NA	0.0260864	3.19444e-06	0.554236	0.196474	0.672929	0.426512	NA
CWC22	9.57368e-10	NA	0.0989796	0.121407	0.00069009	1.12202e-10	0.000110139	1.16073e-06	0.671523	4.23612e-09
C10orf118	4.61604e-11	0.139295	3.90799e-13	1.69114e-05	0.00689044	4.04448e-10	7.38013e-09	0.573873	3.55271e-15	1.6119e-10
COX8A	0.0827461	NA	0.316048	8.15604e-06	NA	6.73627e-06	6.73627e-06	5.57045e-05	0.000463389	2.45927e-09
CD8A	0.505917	NA	NA	0.0543053	0.0789401	2.17801e-09	1.47713e-09	2.75872e-05	1.13198e-09	1.02773e-10
CACNG5	0.677695	NA	NA	0.000160375	0.0374298	0.0578812	0.608314	0.635701	0.992295	NA
ADPRM	0.0044333	NA	NA	NA	6.10429e-05	0.0656959	4.56224e-08	1.21531e-10	2.87628e-11	0.000115162
AP3M1	3.45316e-05	NA	NA	4.96842e-05	2.3488e-06	0.761065	NA	0.280087	0.0012321	NA
ABCD2	2.40179e-08	NA	NA	3.16359e-08	1.84136e-07	0.131075	0.841433	2.32085e-07	0.270551	1.46905e-05
CCDC92	0.232642	NA	0.0276008	0.00183898	0.385257	0.655847	0.00211498	1.51031e-06	1.47757e-07	8.11279e-06
ACCSL	1.21531e-10	4.8999e-10	4.80601e-05	5.79587e-09	NA	0.0125528	5.92034e-07	0.741897	1.68598e-10	5.41948e-05
DIRAS2	NA	NA	NA	NA	0.28373	NA	0.442299	0.0159302	0.246208	NA
DEFB110	NA	NA	NA	0.0165329	4.65661e-10	4.65661e-10	1.1194e-05	0.00386559	4.65661e-10	4.65661e-10
ADAD2	8.03215e-09	0.728911	0.560722	0.00978948	0.991083	5.43983e-05	8.54372e-06	0.0950494	0.000447624	NA
CALML5	1.26996e-08	0.000154933	0.0993161	0.0448451	1.94656e-07	0.00341403	7.00823e-10	8.52651e-14	1.83226e-09	9.02049e-06
ANXA5	0.0127068	5.86291e-07	NA	0.0512342	6.36646e-11	0.375132	0.000131234	0.201808	0.000241474	NA
CAMK1G	0.000336437	0.899515	0.00352048	1.46088e-07	2.44373e-06	0.118149	0.000379098	3.48989e-07	5.45697e-12	NA
COPG2	NA	0.0624893	NA	0.000329717	1.31525e-05	8.14907e-10	2.50293e-09	5.09614e-06	0.0578694	NA
CABP2	NA	0.00819242	0.206456	6.76592e-06	1.00143e-05	NA	NA	8.57288e-06	0.368211	0.000123247
DEFB133	2.40107e-10	NA	NA	0.00086963	1.45519e-11	0.0190867	2.18279e-11	3.13594e-08	0.0871283	NA
C16orf52	NA	NA	NA	NA	NA	NA	NA	NA	NA	NA
CADM3	0.242436	0.000880576	NA	0.00105928	0.316048	0.00391256	0.492152	0.000495037	0.369645	NA
DAG1	0.0151353	0.00139445	3.0898e-11	0.238847	8.07962e-09	5.05862e-05	0.255137	0.327763	0.204867	3.78327e-08
C15orf39	9.18365e-06	0.000159755	3.55271e-15	0.0127105	3.55271e-15	7.73881e-06	3.55271e-15	3.92808e-05	0.208462	0.219517
BRAP	0.0125658	NA	NA	NA	0.409906	1.08966e-05	0.712864	0.0350577	1.63084e-10	0.000543514
CCNJ	0.00518731	NA	NA	NA	7.53062e-10	0.0155047	5.38093e-08	0.295618	0.000192338	NA
FBXW2	NA	NA	NA	1.02445e-07	0.0085893	0.444234	0.0726528	3.46359e-06	NA	NA
CTHRC1	8.00355e-10	NA	NA	0.709287	0.00756658	6.53609e-05	0.00202583	5.13816e-05	1.45519e-11	NA
CCL4L2	NA	NA	NA	0.254859	3.14787e-07	0.0322649	0.570653	1.45519e-11	0.157866	0.97622
ALG10B	0.0481645	NA	NA	2.07001e-08	3.14014e-07	0.0584029	1.12746e-05	1.54354e-06	0.774995	3.63798e-12
ARL5C	0.00856207	0.714546	0.520561	NA	3.63798e-12	9.09495e-11	7.40329e-09	2.60134e-07	NA	8.6402e-09
BC043620	NA	0.633185	0.000696217	2.02606e-08	0.789209	0.368944	4.97677e-06	0.970736	0.000490237	0.152868
ACTG1	NA	NA	NA	NA	NA	NA	NA	NA	NA	NA
ALS2CL	0.0654048	0.299121	0.112009	2.30053e-08	0.00343786	0.459018	3.66728e-07	1.26055e-08	1.77636e-14	0.0765014
CBS	3.03828e-11	NA	NA	NA	0.00733457	0.0142942	0.121545	1.83226e-09	0.000199356	3.60475e-09
ARL13A	2.93932e-07	NA	NA	0.969328	2.79215e-10	0.0185335	0.0359803	1.81899e-12	NA	9.7225e-10
CXCL6	0.0573816	2.87155e-06	7.59109e-07	0.590802	0.283413	0.000199499	0.00210876	1.90962e-07	3.76643e-05	NA
CCDC78	0.315294	0.539285	NA	0.363342	1.60737e-07	1.41497e-10	0.0106804	1.41497e-10	2.22216e-08	2.84217e-14
CD58	1.39698e-09	0.705254	0.005712	0.0738777	4.09782e-08	0.76085	0.000557802	NA	NA	1.53668e-08
CMIP	NA	NA	NA	NA	3.72529e-07	0.877918	NA	1.49012e-07	0.000300899	NA
CXCL11	1.11686e-09	NA	1.0483e-06	3.67004e-06	6.14818e-10	3.62124e-08	1.81899e-11	3.63798e-12	1.81899e-11	NA
BC037321	NA	0.79422	0.11105	0.12032	1.02445e-07	0.491946	2.35625e-07	0.00359718	NA	9.31323e-10
FBXO28	NA	NA	NA	0.013285	0.916904	0.858036	1.45519e-11	0.196924	3.56507e-07	NA
CAMKK1	0.000182808	0.636666	0.16103	3.83216e-09	0.136984	1	1.0748e-05	1.00142e-05	5.44762e-08	NA
AVPR1B	7.10543e-15	0.390101	5.95642e-07	5.10898e-09	0.0100059	0.136624	7.80576e-07	0.0669052	3.55271e-15	5.05862e-05
ACSBG2	0.00806603	4.04448e-10	2.57366e-10	1.2855e-05	0.657183	0.00054011	0.00368203	0.000636345	NA	0.131399
COX11	0.184738	NA	0.557162	5.10584e-05	0.00518731	0.199107	0.0081913	0.0205008	9.20409e-10	0.387231
C16orf96	NA	2.24466e-09	0.00695458	0.0779819	0.00159583	6.44866e-08	1.42109e-13	0.000512526	1.85141e-06	6.73062e-05
C12orf75	0.000256289	NA	NA	0.0549216	0.80783	0.036435	0.000608409	NA	0.00870546	0.685047
AGPAT1	0.0200332	NA	NA	2.60188e-08	0.587558	6.33538e-06	0.0025107	3.64712e-06	0.0165998	NA
DNAJC1	0.00793742	NA	2.10153e-08	0.144971	1.6542e-07	7.5957e-12	8.08811e-11	7.10543e-15	3.05533e-13	6.25278e-13
DEFB121	0.95963	NA	NA	0.00459092	0.241533	1.25463e-05	1.16415e-10	0.436471	4.31901e-08	NA
CORIN	0.00141455	NA	0.57065	0.616033	0.0443668	0.336663	1.04967e-08	0.906727	8.91465e-08	5.3011e-10
ADAM20P1	0.000979019	0.0119551	0.0215685	0.000533569	0.0494679	0.372752	1.74158e-05	NA	0.00725158	0.00130848
CAPN8	0.00243641	4.92208e-08	1.02634e-05	NA	0.00200798	0.0397682	1.39927e-05	0.390262	9.62227e-05	0.406436
DBR1	7.10543e-15	6.00409e-13	1.78535e-05	0.952841	0.960694	5.04222e-10	0.0300037	1.88441e-05	4.9738e-14	2.72034e-08
COQ10A	8.66703e-06	NA	3.75558e-06	0.335188	0.152639	3.40988e-06	3.94933e-05	0.625738	0.0413729	NA
BTF3L4	NA	NA	NA	NA	NA	NA	NA	NA	NA	NA
ADCK2	4.97117e-06	5.19659e-08	0.000226421	0.816788	0.000728433	0.120142	3.43009e-06	7.8744e-05	0.582157	2.13972e-06
ANKRD20A3	NA	NA	NA	1.16415e-09	0.00547361	0.202515	1.16415e-10	1.16415e-10	NA	3.84171e-09
CA13	NA	0.304912	0.00652977	0.00409412	0.000108851	0.00148574	8.66294e-11	0.175691	5.53183e-06	8.42094e-06
ANGPT4	1.42109e-13	0.0235572	NA	5.75699e-09	2.89191e-11	1.14917e-08	0.0542261	2.0426e-07	2.84217e-14	8.21057e-06
CYB5D1	7.52372e-06	NA	NA	4.1083e-05	3.18323e-12	0.131299	2.27374e-12	0.00554913	8.6402e-12	NA
ACACA	NA	NA	NA	8.31945e-08	1.61762e-10	1.28466e-11	1.42109e-14	1.98952e-13	6.01711e-06	0.000535732
COX6A1	1.76971e-06	0.0481231	1.03056e-06	0.989774	4.30067e-05	0.0634421	0.83749	0.102958	1.94731e-07	NA
DEFB112	3.72529e-09	NA	NA	0.014538	8.00937e-08	0.427955	3.72529e-09	NA	NA	0.0919496
DIRAS3	0.0900242	NA	NA	0.0070712	7.45058e-09	0.000965737	7.45058e-08	0.163799	NA	NA
COLGALT2	9.88734e-10	NA	0.0164981	0.986175	0.00124113	0.27305	3.41061e-13	1.74358e-07	0.0499444	2.46035e-08
CCDC68	1.52957e-06	7.79049e-10	7.1634e-06	5.44154e-07	2.81329e-07	0.000678918	0.0611048	1.23058e-08	4.22971e-07	0.00126327
CXorf21	3.95403e-10	NA	4.10137e-05	2.95427e-09	0.00389513	0.0462445	0.241759	0.0341587	7.50333e-12	NA
DNAL4	NA	NA	NA	NA	NA	0.0268478	NA	0.000106812	NA	NA
CCDC87	0.00453881	0.30165	0.0221476	9.81535e-06	0.0535256	0.384959	4.25846e-05	0.401001	2.58705e-06	0.457299
CASQ2	2.27374e-13	0.050491	NA	8.08119e-06	0.425813	0.293921	0.352971	0.0240329	0.00128863	0.256689
ATP6V0A2	0.700552	0.27217	0.00606133	0.836	0.573873	0.165131	5.79125e-06	1.69114e-05	5.10898e-09	8.62073e-10
ACSM2B	NA	NA	NA	0.130501	1.14687e-09	1.35426e-06	0.000148646	NA	0.279606	0.0142604
CTSL2	0.75244	0.000819168	NA	0.0549172	1.379e-06	0.101706	0.220433	8.66703e-06	0.635953	3.63798e-11
BC023201	0.2435	NA	NA	NA	NA	NA	NA	NA	NA	3.05176e-05
CXorf51A	2.08616e-07	NA	NA	0.582225	8.1569e-05	0.0072909	0.00104439	NA	NA	5.96046e-08
C15orf60	0.00236405	NA	1.24738e-05	0.97163	0.890888	0.000824555	9.73444e-13	3.26133e-07	0.00118577	NA
CCL4	0.0853564	NA	0.00122944	0.425813	1.48685e-07	0.359255	0.0490413	1.01636e-10	0.00203757	0.00302236
C11orf58	0.0399895	NA	NA	0.0214844	1.90735e-06	0.123093	NA	6.29425e-05	NA	NA
DEFB134	NA	NA	NA	1.30385e-08	0.685047	NA	NA	0.145999	NA	NA
C16orf54	0.381902	1.91631e-09	NA	0.00605169	1.13198e-09	0.00108216	0.000413162	5.75251e-05	NA	3.41061e-13
DNAJC10	0.531541	0.658294	NA	0.268443	3.55271e-14	1.00766e-09	6.46175e-10	1.75889e-08	9.32816e-06	0.372783
CBX7	NA	NA	0.421045	1.5301e-06	1.69627e-06	0.00518374	NA	5.09317e-11	0.886029	NA
ASPG	0.204238	0.159694	0.0132997	NA	0.00128565	0.00438616	0.0862795	NA	0.509064	1.83395e-06
BLOC1S2	0.848904	NA	0.32721	0.374079	0.000792146	NA	0.00316053	0.0145989	8.2016e-05	5.21541e-07
CCL22	3.50698e-05	NA	NA	2.54659e-11	0.830654	0.00856207	3.63798e-12	6.9409e-07	0.142264	6.83826e-05
ATG13	4.17583e-08	NA	NA	NA	1.42109e-14	0.00938259	0.00194375	0.459165	2.84217e-14	0.0279333
AQP4	0.00227884	NA	NA	0.437905	5.48508e-06	2.54037e-06	6.48826e-07	0.396465	0.796376	0.988565
COMP	0.211112	0.00477765	0.000231325	1.31291e-05	9.37916e-13	0.000220182	1.17344e-07	NA	4.4196e-08	0.16344
BATF3	NA	NA	NA	0.0900242	2.76417e-06	0.507584	5.52982e-05	0.0856554	0.0102569	NA
CPNE3	NA	NA	NA	0.0313198	1.51468e-07	2.92933e-07	5.68434e-14	0.39764	1.57792e-05	0.0032863
DEFB123	NA	NA	0.154726	2.32831e-10	5.52973e-07	2.75723e-05	6.98492e-10	5.52973e-07	0.000120529	NA
ADIG	1.2049e-08	NA	NA	4.43542e-08	2.1595e-08	NA	NA	5.82077e-11	9.83709e-09	NA
ARFGAP2	3.8552e-08	NA	0.0161321	5.41434e-12	3.55271e-14	0.00793742	0.842918	7.49423e-08	6.46175e-10	NA
CRYZL1	0.000901355	NA	0.000223223	0.0275534	0.44643	0.840555	0.00284897	1.794e-07	0.163105	NA
DMRTB1	0.00390236	0.00262804	0.956691	0.258124	NA	0.00025036	2.05397e-06	1.46097e-05	7.27596e-10	0.208685
C10orf82	0.0654048	0.30848	7.15109e-05	8.07962e-09	5.95642e-07	6.73748e-09	4.9738e-14	NA	7.10543e-15	0.0109547
DEFB113	5.77944e-07	NA	NA	0.72796	0.148791	2.37413e-05	0.000118118	0.000128288	NA	2.87141e-05
DCBLD1	1.94996e-09	0.000558521	6.36093e-05	0.0288793	6.12235e-08	0.0288793	1.0483e-06	0.459558	3.63798e-11	NA
ANKRD44	0.706477	0.00203757	NA	0.000837223	0.026503	0.0853564	9.32688e-06	5.20671e-06	1.59162e-11	2.61777e-06
C12orf76	NA	NA	NA	NA	NA	0.135376	0.00335693	NA	NA	0.934082
BC024682	0.00229719	NA	NA	NA	3.85797e-06	5.04322e-08	4.05157e-09	0.168299	5.41948e-05	0.00124113
CRHBP	0.246668	0.143559	NA	2.27374e-12	3.78557e-07	0.102208	5.90312e-07	0.143559	0.00243285	NA
ACTG2	NA	NA	NA	NA	NA	NA	NA	NA	NA	NA
CCT5	1.92085e-09	NA	NA	NA	1.2049e-08	NA	NA	0.000329717	0.543631	NA
ARL2	NA	NA	0.731718	2.83122e-07	7.45058e-08	0.0262309	1.49012e-08	0.386493	NA	0.859313
COX8C	0.000217181	NA	NA	3.72529e-09	0.00478796	0.00116981	0.00116981	4.13358e-05	0.0243342	0.143254
CPT1A	1.26093e-06	0.583598	NA	1.08912e-09	1.2637e-05	0.902158	0.000568127	3.08812e-08	0.00334099	9.54676e-05
C12orf77	0.13489	NA	NA	NA	0.00960879	0.33614	0.0200018	NA	0.00270773	0.20214
CNDP2	0.572421	NA	0.0156634	4.196e-08	0.424167	0.000307169	8.79507e-06	2.12157e-09	0.0579768	1.68754e-11
C12orf56	5.68434e-14	0.871069	0.385593	0.00205349	0.0057271	2.58115e-09	0.000171481	1.8764e-10	0.00270932	0.501734
AMT	0.340731	2.58392e-05	7.49423e-08	0.351217	2.3158e-05	4.08107e-10	6.52891e-06	0.000168922	0.0291551	3.11069e-06
BNIP3L	NA	NA	NA	NA	7.71601e-06	2.32831e-09	0.399959	0.00413105	0.0165329	NA
ADAM32	2.24466e-09	0.870931	NA	0.325601	0.0133297	7.25666e-06	1.42109e-13	0.00458383	0.618301	4.26326e-14
BOP1	0.0104413	NA	NA	0.123943	2.27926e-05	0.0948577	0.0159748	0.448582	1.88265e-10	0.000189948
CRYBB2	NA	NA	NA	NA	NA	0.274445	0.0739136	0.0249634	0.0289917	NA
BTN2A2	NA	NA	NA	0.326788	1.33428e-07	0.823761	8.70841e-09	0.000381447	4.74196e-06	3.18323e-12
DEFB135	5.61327e-05	0.086502	2.82489e-05	1.02445e-07	0.000106774	5.31785e-06	9.95584e-07	0.0246456	2.79397e-09	8.19564e-08
ALG8	0.00218382	NA	NA	0.002959	0.0295367	0.20427	0.067639	5.52936e-07	1.18167e-05	NA
CXorf51B	NA	NA	NA	0.455874	0.0137793	0.00109267	0.0604271	NA	NA	NA
ACTL9	0.910046	2.27514e-07	0.0866527	0.00758486	NA	NA	NA	1.85863e-06	0.00151762	0.00129753
ARHGEF10L	0.204047	0.00057159	0.0576793	1.65403e-05	2.59152e-06	0.656147	0.000155452	0.000778331	9.69963e-07	0.72521
CUL4A	0.00451652	0.00740791	NA	4.43542e-08	3.25497e-06	0.576427	0.0025107	1.60944e-07	0.00117333	NA
CCDC115	0.00096026	NA	0.00152279	0.877899	5.95746e-05	0.0143663	0.656279	1.38243e-07	5.82077e-11	NA
CAPZB	NA	NA	NA	NA	NA	NA	0.302795	0.846924	NA	NA
ATP5C1	0.0243186	1.84082e-09	3.36779e-05	NA	0.365043	8.66703e-06	0.615592	0.000279941	0.0817797	NA
ALOX5AP	0.133869	NA	0.000139676	1.60784e-08	2.63611e-12	NA	NA	7.10543e-15	9.48504e-07	5.14554e-10
DMD	9.03649e-10	5.99522e-07	6.73151e-09	0.697277	0.0741567	0.00228032	0.22124	2.16445e-09	0.30031	5.97174e-10
CCDC13	9.02943e-10	0.0622731	0.000185563	0.000280716	1.01772e-08	2.88055e-05	0.00931281	3.55271e-14	0.955433	0.000456777
CA7	0.000205904	NA	NA	6.74845e-10	2.10478e-05	9.09495e-12	0.259141	0.744604	0.0747265	NA
ATAD1	NA	NA	NA	NA	NA	0.000253439	3.26633e-05	0.0326698	1.66893e-05	NA
ABCA10	3.63798e-12	NA	NA	NA	2.32085e-07	6.2881e-06	0.5665	3.20142e-10	NA	3.63798e-11
DNAJC3	0.242447	NA	5.45697e-12	0.13868	0.000569883	1.00044e-10	0.00277063	3.63798e-12	1.81899e-12	0.826382
BC037497	3.84447e-05	0.339267	NA	NA	4.38868e-05	6.25322e-07	0.302718	0.0258114	4.52792e-09	4.54747e-13
DCTN5	NA	NA	NA	NA	NA	NA	NA	NA	NA	NA
CABP4	1.13687e-13	0.0044333	5.15105e-06	0.00283571	1.00044e-11	5.57085e-08	2.35332e-11	3.03224e-08	0.257988	4.22033e-07
CSNK1G1	NA	NA	0.554236	0.973081	NA	0.0907456	2.91038e-09	0.221425	0.648418	NA
ADRBK1	NA	NA	NA	0.357545	NA	0.0129718	0.0830636	0.0160541	2.56114e-08	NA
CXorf56	NA	NA	NA	NA	NA	NA	NA	NA	NA	NA
CLDN2	0.00251291	8.69366e-07	NA	NA	1.81899e-12	8.20273e-08	0.580807	2.27068e-05	0.984094	NA
FBXO4	0.646915	NA	4.54747e-13	0.766476	0.0170077	4.86125e-10	5.00293e-05	0.000323276	3.275e-08	NA
CD320	0.119984	NA	0.000675983	NA	NA	0.000136164	0.00461203	4.79468e-06	5.92034e-07	0.0749559
ACVR1	NA	NA	NA	NA	0.646437	0.0187569	NA	2.32831e-10	0.271868	NA
APPL1	0.00313006	NA	7.27596e-12	NA	0.000604217	7.27596e-12	6.6002e-06	0.144384	0.00384374	NA
DCXR	0.00963849	NA	NA	NA	0.00665371	NA	NA	0.857576	0.0092576	1.03519e-08
CNOT7	NA	NA	NA	NA	NA	NA	NA	NA	NA	NA
CMTM5	2.40179e-08	NA	0.00428911	0.714546	NA	8.94033e-08	7.27596e-12	NA	9.20409e-10	0.663664
AK4	0.178842	NA	0.67987	0.0870706	0.00266747	0.00477911	5.82077e-11	6.60133e-07	0.000163745	NA
CXCL12	1.12952e-06	NA	NA	2.72848e-12	1.81899e-12	0.0528504	4.62142e-08	0.00053808	2.92221e-09	NA
AIRE	0.0341587	NA	0.000481783	0.0519756	0.00830558	0.000758806	4.54747e-13	0.0028952	0.697602	0.346756
ARL6IP1	NA	NA	NA	0.263893	0.0018534	0.247438	0.58145	0.115614	NA	NA
DDTL	0.169814	NA	NA	0.01619	0.00821505	0.0318958	0.290081	0.003878	NA	NA
AP3M2	NA	NA	NA	0.464545	0.700033	4.42192e-06	NA	2.55182e-07	0.00171859	NA
C13orf35	NA	NA	NA	NA	0.0209961	NA	NA	NA	NA	0.000488281
DEFB114	NA	NA	NA	0.0318958	1.3113e-06	0.00594035	2.5183e-06	0.0173858	NA	0.000109777
C9orf47	0.898736	NA	0.0114727	0.655639	NA	0.0328941	0.566068	3.33786e-05	NA	0.0127273
CD59	3.51365e-06	0.72052	0.606891	0.712162	NA	8.01168e-08	2.5409e-11	NA	0.0120248	NA
DNALI1	0.000219258	0.459558	NA	3.63798e-12	6.9409e-07	1.81899e-11	0.150111	NA	0.819906	NA
CPA1	0.00276688	NA	7.1634e-06	0.000201992	0.137119	9.34705e-10	3.54734e-08	4.3792e-09	0.000395973	1.70531e-09
C14orf105	6.81931e-06	0.00356015	0.00159583	0.0012027	4.48736e-10	4.26326e-14	9.09495e-12	0.000611205	1.80432e-09	0.525471
AIFM2	0.0207631	0.618428	0.180734	3.0461e-08	8.52651e-14	0.132571	3.97904e-13	5.44588e-10	0.626092	0.000189634
CACNG6	2.53058e-08	0.267707	0.369645	1.60809e-06	NA	NA	NA	6.50471e-09	0.000140741	6.50471e-09
BLOC1S3	NA	NA	NA	NA	NA	NA	NA	0.000489473	0.0236499	0.000216901
ADIPOQ	8.8005e-08	5.54074e-06	0.222954	2.05637e-08	8.6402e-12	5.70665e-07	8.19723e-07	0.00972594	0.000305759	1.27194e-06
CCDC42B	2.27374e-12	0.0341587	0.000481783	1.15313e-05	0.0177602	0.0248336	3.56894e-06	0.787984	0.00213058	2.27374e-12
CTIF	0.226452	0.189289	NA	0.00029367	0.695515	4.64781e-05	1.44595e-11	0.395136	5.38876e-11	NA
ACIN1	2.13163e-14	NA	0.378298	6.33425e-05	0.51166	0.923098	0.000351142	0.010892	1.54952e-09	0.460569
ATG4D	0.00134285	3.12639e-12	4.94367e-10	1.42109e-12	0.991083	0.0202648	0.177288	1.08912e-09	0.000287598	0.00978948
ATF3	0.195633	0.465317	0.0258217	NA	NA	0.000965118	NA	0.0258217	0.241253	NA
DEFB124	0.000359494	NA	NA	0.013288	2.86472e-06	4.881e-07	NA	0.613706	0.307421	0.703676
ANXA6	2.44995e-10	3.27358e-06	3.51365e-06	0.0449878	3.97904e-13	0.0862795	5.68434e-14	2.10889e-11	1.87583e-12	5.68434e-14
CASP2	0.103958	NA	3.17452e-07	2.22538e-06	0.837109	0.00197246	0.000519186	1.22498e-10	0.0823483	NA
DEDD	0.348303	0.0387414	NA	0.0652196	NA	0.000244919	NA	0.0265956	NA	NA
CNRIP1	NA	NA	NA	NA	NA	0.0595074	0.373725	0.682714	0.000104904	NA
CALML6	0.317407	0.839524	NA	0.00157013	4.57093e-06	0.722957	0.227993	NA	8.80798e-07	0.748426
COX6A2	0.0207546	NA	NA	1.81099e-08	0.00227674	0.00104871	1.27329e-10	1.04374e-08	1.27329e-11	NA
DEFB136	5.76745e-06	0.00547361	0.334232	3.19444e-06	0.00769296	0.509729	2.21189e-09	NA	8.14907e-09	NA
APC2	0.0110744	0.0258986	5.45697e-12	0.0232061	NA	NA	NA	NA	3.94884e-08	1.64437e-09
ANKRD34B	0.000154933	1.45062e-09	0.573318	5.30461e-08	1.22213e-12	4.48344e-09	4.12417e-06	1.71032e-08	5.68434e-14	0.000778709
ABO	NA	NA	NA	NA	0.596588	NA	NA	NA	NA	0.297852
C11orf63	2.6054e-07	4.77781e-05	0.100218	7.88567e-05	1.9054e-05	0.0134161	6.68842e-06	1.61693e-05	7.6646e-10	4.53264e-06
CA14	6.80985e-05	0.000285686	2.81822e-06	0.165131	3.2324e-10	0.759881	1.9419e-08	0.805328	0.000497143	0.000200441
CCNE1	7.90806e-10	NA	0.00231899	0.00602688	0.0113363	4.68657e-05	0.0203003	0.0432801	8.33465e-05	0.0304801
DNAJB14	NA	NA	0.0205759	0.00720582	5.57045e-05	7.07408e-05	0.067553	2.63591e-05	2.21856e-06	NA
CYC1	0.988109	NA	0.0253449	0.230435	0.0335589	0.00191337	0.000379096	9.84521e-06	5.42059e-08	0.024323
CXCL9	2.91038e-10	NA	0.00317837	0.747639	4.54747e-13	4.11092e-10	0.940831	0.174708	0.692047	NA
CRISP2	2.53422e-08	4.10773e-08	0.291311	0.148044	0.000131234	9.09495e-13	2.50742e-06	5.82995e-08	0.017863	0.0165842
ACTL10	4.31265e-05	0.840555	NA	0.27648	0.27648	1.74509e-11	5.68434e-14	3.51365e-06	0.955439	NA
ARMCX1	6.23004e-11	NA	NA	0.911346	0.638033	0.314605	3.57748e-07	3.84447e-05	0.611694	NA
BATF	NA	0.803988	NA	0.785742	0.0953877	NA	NA	1.49012e-08	0.803988	NA
ACAN	0.214804	6.66493e-05	5.44357e-06	3.5706e-05	5.76904e-10	0.0379633	0.00364891	5.71786e-05	0.000307169	1.68754e-11
CCL23	NA	7.27596e-12	7.27596e-12	0.518291	0.225975	3.62197e-08	0.00013128	0.0549172	0.00365302	1.26529e-08
AGFG2	3.78327e-08	0.190928	NA	0.000229211	0.797704	0.0103139	0.318028	3.90799e-13	1.32185e-06	0.190928
ABP1	9.02049e-06	0.000107877	7.03758e-05	0.103958	0.0370622	0.0113912	0.00532901	0.00148101	0.000242981	0.481202
C14orf166B	0.325601	6.44866e-08	0.47856	0.00606606	5.29354e-11	0.0228877	2.40163e-12	0.0502713	0.838029	0.96238
AP5S1	9.88507e-11	NA	NA	0.382184	0.687295	0.000653876	4.10898e-09	NA	0.00140234	NA
ASCC2	2.38967e-07	1.32433e-07	4.47997e-12	9.05014e-08	0.00436128	2.06617e-07	0.000986715	8.34545e-07	6.48369e-05	3.66728e-07
DEFB115	0.896588	NA	0.238572	0.17752	0.162353	NA	NA	NA	NA	NA
ARNT	0.363342	3.82226e-08	NA	4.26326e-14	0.709703	0.189493	4.36273e-12	0.149821	0.124408	7.97197e-07
C9orf50	0.416682	0.0408248	0.241533	NA	2.82726e-06	0.879293	8.14907e-09	0.531753	0.95963	1.16415e-10
AGPAT2	0.0101974	0.326894	0.000569883	5.84516e-06	0.0408014	0.931152	1.05574e-06	NA	4.76579e-07	5.72327e-08
DAAM1	4.23483e-10	NA	0.0692825	3.12745e-05	1.13687e-13	2.80238e-09	0.0109069	0.590802	3.17266e-09	NA
DDT	NA	0.0327209	5.14463e-06	0.228553	0.640825	4.96842e-05	0.000137394	0.80783	4.42192e-06	NA
BMP1	3.15494e-05	0.16552	0.097986	0.00672235	7.10543e-14	0.39774	0.912362	2.43582e-08	0.386066	0.00356015
DLEC1	4.74667e-09	0.000233957	0.0115862	0.0112344	0.351217	0.0420597	0.923098	8.12707e-08	6.25278e-13	0.858853
AARS	2.28055e-08	1.28126e-05	NA	0.706562	1.52761e-05	0.206022	9.34705e-10	3.43009e-06	0.0124123	NA
COPRS	0.622495	NA	3.72315e-06	0.811476	0.213216	0.00621199	0.0406942	0.00874493	4.73671e-05	0.00652904
ABI2	0.00984366	NA	NA	1.79273e-05	NA	NA	NA	0.00088339	0.901796	NA
DLX1	NA	NA	NA	0.089695	0.701181	0.498009	0.105398	NA	NA	NA
ADAMTSL5	5.22519e-08	0.000191613	5.26867e-12	0.395596	5.79125e-06	0.0639316	0.267842	NA	1.44517e-09	3.55271e-15
CCL5	0.105813	0.0215461	0.270692	2.49202e-10	0.231737	0.0278363	4.60204e-10	0.00726407	1.04374e-08	NA
ADD3	0.000106515	NA	NA	0.000350838	1.83395e-06	0.070666	0.000469678	0.12559	3.61324e-05	3.54144e-07
BTF3	NA	NA	NA	NA	NA	NA	NA	0.0709836	0.542404	NA
DKFZp761D112	0.060006	NA	3.76638e-05	7.1479e-08	2.10479e-07	0.00118713	5.62891e-06	0.0652196	NA	NA
DHODH	0.859168	0.000229211	NA	NA	0.313231	0.000986715	0.000403004	0.0174513	0.56048	8.37707e-08
ARL2-SNX15	0.0357135	NA	NA	0.327971	0.667002	0.0224543	0.730753	0.446475	0.00493532	NA
CNOT8	NA	NA	NA	NA	NA	NA	NA	NA	0.00100708	NA
BLOC1S4	7.24792e-05	3.8147e-06	3.8147e-06	0.210117	NA	NA	NA	NA	0.0955124	NA
DHRS7B	7.8586e-11	NA	2.77121e-08	NA	0.00997413	0.000888407	2.30483e-09	0.00154369	2.50111e-12	2.84217e-13
CYSTM1	NA	NA	NA	0.0798759	0.181866	7.62939e-06	0.890568	0.0204124	0.622562	NA
CD8B	NA	NA	5.19349e-08	5.86291e-07	0.0206751	NA	NA	9.09495e-12	9.16152e-08	0.375132
ARGFX	NA	0.000797898	4.65661e-08	0.00087182	2.55182e-07	2.3488e-06	1.86265e-09	1.99117e-06	0.000123337	3.72529e-09
DAXX	0.00660268	0.696773	9.20673e-05	0.147401	0.000744968	2.93714e-06	9.37916e-13	NA	0.00842063	1.45062e-09
DCTN6	NA	NA	0.000965737	NA	5.21541e-08	4.09782e-07	5.67734e-06	0.254513	1.51396e-05	NA
C1orf170	0.341458	7.10543e-14	1.42109e-14	7.71994e-06	0.427823	8.73003e-06	0.421705	7.64594e-08	0.539285	4.26326e-14
DENND1A	0.000395973	4.74734e-06	NA	4.64151e-09	4.91907e-09	1.81873e-05	0.369316	0.192509	5.17509e-07	0.530356
CSTF2T	1.82638e-10	0.0973476	NA	0.184708	2.5409e-11	0.00103123	4.64684e-06	0.0329074	0.156336	2.84217e-13
ACP1	2.07932e-06	NA	NA	0.000364067	5.09317e-11	1.38971e-07	0.0588141	2.18279e-11	2.02002e-07	NA
CTSB	7.95808e-13	NA	2.29137e-06	2.58981e-05	2.29137e-06	0.000274113	0.0015533	1.13687e-13	1.47713e-09	5.68434e-13
DIRC1	NA	0.799034	NA	0.0917325	0.0127273	0.0251389	0.0500727	0.00664949	0.000176907	0.632729
DEFB125	2.38419e-07	4.93526e-05	NA	4.93526e-05	0.000298023	NA	NA	NA	NA	0.00272632
BRWD1-AS1	3.65973e-05	NA	NA	3.57628e-07	0.944107	0.344877	1	0.0115161	NA	0.22919
ATF4	1.84617e-08	0.0644481	NA	0.465582	1.49848e-05	0.315294	0.0855521	0.0192014	8.29149e-05	8.73065e-05
DEFB116	0.000634849	NA	NA	0.000139246	3.15406e-05	5.05184e-07	2.61202e-05	NA	NA	NA
CR1L	NA	NA	NA	0.106625	0.000541123	0.000195351	4.65661e-09	1.04504e-05	0.15742	0.00756036
DEFB1	NA	NA	NA	0.00327873	0.00100231	NA	NA	NA	0.0459929	0.000104904
ARHGAP39	0.00108216	NA	3.0934e-06	0.00229719	0.00911553	7.47658e-08	7.28181e-05	4.88853e-12	0.000556636	0.647952
CBX8	1.09209e-05	NA	NA	1.4611e-09	1.08002e-09	0.000361078	6.36646e-12	5.70665e-07	2.91038e-10	0.0131729
CCDC116	7.8586e-11	8.45284e-09	NA	0.00786118	0.820237	0.0350577	1.5234e-11	0.00477765	0.000102349	0.00125257
CD40	1.2941e-09	1.35301e-05	1.21531e-10	4.59655e-07	1.03399e-05	0.0420829	0.175691	3.65276e-10	2.47212e-09	2.27374e-13
ADNP	NA	1.13687e-13	7.95808e-13	0.00560469	2.29137e-06	1.13687e-13	4.80601e-05	2.49999e-07	0.0015533	1.13687e-13
C16orf86	0.104421	NA	1.78651e-07	0.207278	1.19776e-10	0.104421	1.98227e-06	0.923098	0.00056611	0.00109498
CRYBB3	0.201179	0.0158245	NA	7.97445e-09	0.0030072	9.1838e-05	0.00781189	3.33821e-07	2.50875e-07	2.16824e-07
ARR3	0.321474	0.87394	NA	3.25963e-09	2.32831e-10	0.00829845	2.56114e-08	NA	0.0737138	0.0169156
ATAD2B	0.00355808	0.171325	0.000354645	0.0459877	8.37707e-08	0.774948	0.0138772	1.08724e-06	0.00209571	1.01811e-06
FBXW4	0.00050913	NA	0.42575	1.46505e-05	0.60783	0.000481599	NA	0.368211	0.0265039	NA
ARL13B	0.000185563	0.259652	0.00516017	0.0171058	1.46895e-08	3.90799e-13	7.10543e-14	0.106663	0.0181295	2.60969e-07
CXorf57	NA	0.227762	NA	0.285443	0.0584917	NA	NA	4.74361e-07	NA	NA
CCNA2	0.0756845	0.797639	0.16729	1.34633e-08	0.000256204	0.959111	0.0265039	1.34633e-08	0.144401	4.60591e-05
CYP2B6	NA	NA	NA	0.000379098	0.146089	1.82672e-07	3.063e-08	0.1659	0.000508038	0.00609645
BC029255	0.275341	NA	NA	NA	0.072834	NA	NA	NA	0.00714493	NA
APIP	4.4196e-08	NA	4.02963e-07	8.05748e-07	3.03828e-11	0.00068143	2.13208e-05	0.000340841	0.0448451	NA
CLASP2	0.00356015	NA	5.20103e-09	0.0598911	4.15639e-05	9.67386e-05	0.000101798	0.000391466	0.829844	0.000112656
CMTM6	0.00294446	0.0431392	0.000542506	1.75227e-10	0.0858536	0.75656	0.00991872	0.00652465	7.10543e-15	3.38504e-05
CARD10	2.16346e-09	0.664	NA	NA	4.82326e-05	0.692264	0.608914	0.00228509	0.00011278	NA
COX6B1	4.16301e-07	NA	NA	0.00443629	0.00973693	0.749841	4.00525e-05	0.00146811	9.16235e-06	NA
CD22	0.161596	0.00333981	0.00114131	NA	8.27893e-10	0.0111229	1.12054e-09	0.000610483	4.64151e-09	6.69693e-05
DEFB4A	NA	NA	NA	0.0362339	2.67029e-05	NA	NA	0.00943565	0.0106888	0.000585556
CD19	6.10429e-05	0.434603	0.777107	0.00271978	7.50561e-10	NA	NA	0.0874134	0.0201164	1.25056e-11
DIRC2	NA	NA	NA	0.0619737	0.673729	5.26852e-06	4.72282e-08	0.000137672	4.403e-06	0.459558
CCK	0.00431679	6.45181e-07	NA	6.45272e-05	2.73171e-06	0.0185335	0.00215992	3.00133e-11	9.16152e-08	NA
ARHGEF3	0.0111972	0.000968625	NA	9.79981e-10	3.05929e-06	1.13687e-12	9.77707e-12	1.30467e-09	0.310911	NA
CNST	6.12488e-11	NA	1.42109e-14	NA	3.59535e-12	0.178929	0.433992	NA	8.58053e-09	0.686401
ALG10	NA	NA	NA	2.36232e-08	2.82294e-07	0.0841547	5.84516e-06	3.19463e-06	0.910046	6.77574e-09
AGAP2	0.0367468	0.00411689	1.18167e-05	NA	0.0133297	0.001359	0.0744026	6.44519e-10	4.69527e-09	1.50652e-06
CLCN5	NA	NA	NA	0.00956391	2.40107e-10	3.63798e-11	1.2417e-06	4.17494e-08	0.0215685	NA
CPAMD8	0.00428456	5.52973e-07	0.777849	0.33921	NA	NA	NA	NA	NA	0.447318
DKFZp779M0652	7.65216e-05	0.893285	NA	0.338376	1.18493e-05	0.00756658	0.988109	9.65432e-05	NA	3.63798e-10
CCNK	0.451174	NA	NA	0.0985539	5.49646e-05	0.000157563	0.0221579	0.0213157	3.16359e-08	NA
DDX10	0.0212012	NA	3.92808e-05	3.21092e-08	3.92808e-05	3.53744e-11	2.22242e-07	0.952841	2.69438e-11	6.17817e-12
DGCR6L	0.000311525	0.176283	NA	NA	1.30094e-08	0.726879	2.91038e-11	0.441357	1.09477e-05	0.00207928
CACNA2D2	0.0437565	NA	5.51412e-08	0.614744	5.33175e-07	0.109497	0.000223223	3.76997e-06	0.00792521	0.0544299
ASGR2	0.00177285	NA	NA	0.00377814	0.229581	0.00169676	0.00409412	1.20441e-07	0.161137	0.000898782
BLOC1S6	7.27596e-12	NA	4.80359e-08	NA	5.51736e-08	1.81899e-10	1.07902e-08	0.00365302	0.886029	NA
AQP5	0.00347104	0.833407	NA	0.585838	1.64441e-06	NA	NA	0.00183898	0.568881	NA
ADRA1A	0.0195372	NA	0.177173	0.786742	1.5234e-11	0.0511935	6.31022e-05	0.00136249	0.0863573	0.862554
BRWD1-IT2	0.00556946	0.00556946	0.00315857	0.458572	NA	0.00384521	0.000289917	NA	NA	1.52588e-05
DEFB4B	NA	NA	NA	0.686879	2.38419e-07	NA	NA	0.000298023	0.00307083	1.66893e-06
ASB17	0.000538157	0.00583165	0.00444481	NA	1.38607e-09	1.81899e-12	6.91075e-06	0.00151762	4.54747e-11	9.59746e-06
BC031305	0.0059358	NA	0.956858	0.000119763	0.00495555	0.240521	5.68434e-14	1.05445e-11	0.00733457	3.0461e-08
DEFB126	0.00219488	NA	NA	NA	0.0500727	NA	NA	0.0684443	NA	0.0461602
DDI2	0.000132058	NA	NA	0.025331	0.0265956	0.256533	0.00332133	0.00158063	0.0505856	NA
CAMK1	NA	0.0466267	NA	8.95732e-05	0.000168143	0.0948577	0.0075432	0.00261168	6.03646e-05	6.93035e-10
DDX18	0.595682	0.0340899	NA	0.0110215	0.00552489	5.74489e-06	1.00785e-06	9.60967e-06	8.68492e-07	2.84217e-14
ADAM20	0.000595306	0.409906	3.60475e-09	0.965481	0.0766136	0.000189634	5.68434e-14	1.25635e-06	0.199322	8.52651e-14
CYTH1	NA	NA	1.63317e-05	1.66893e-06	NA	0.00718904	NA	0.0691017	NA	NA
ATP5J	5.82077e-11	NA	NA	5.82077e-11	5.82077e-11	7.84366e-06	1.95656e-05	0.0150803	0.350705	4.07454e-10
CYB5D2	2.52912e-06	NA	NA	4.063e-07	3.63798e-12	4.08137e-05	1.28187e-06	0.493928	3.50698e-05	5.75759e-06
BAX	8.96427e-06	NA	NA	0.643775	NA	NA	NA	2.03727e-10	0.0158788	NA
DEF6	3.67358e-08	5.05887e-05	NA	0.000744968	5.68434e-14	0.211112	0.000431456	0.626092	1.56093e-06	7.93506e-10
BNIP3	NA	NA	NA	1.63317e-05	1.63317e-05	0.0691017	5.96046e-07	NA	0.0737926	NA
DAPK1	3.17452e-07	0.795082	1.40344e-08	0.753631	6.94557e-08	0.385593	3.43872e-07	1.25635e-06	0.000267921	1.07664e-07
ARL6IP4	4.56224e-08	0.216227	6.14923e-08	7.95808e-12	0.267965	6.09361e-11	1.97701e-10	NA	3.12745e-05	4.05157e-09
C10orf32	NA	NA	NA	NA	NA	0.759288	NA	0.838194	NA	NA
CCDC106	0.0191229	NA	NA	NA	0.0182479	0.656279	0.144172	0.00823489	0.000382813	0.00534474
COX14	0.00413105	0.106438	NA	NA	0.0252704	0.00294741	NA	1.60323e-05	6.37956e-08	NA
ACTR6	NA	NA	9.53674e-07	1.90735e-06	1.81198e-05	NA	9.53674e-07	1.90735e-06	0.0546932	NA
BST2	9.18695e-05	0.000929192	0.0010566	NA	0.931991	0.33815	0.143293	NA	0.0477791	7.27596e-10
C12orf42	9.09495e-12	0.00693941	0.738848	NA	0.00394818	9.2678e-06	9.09495e-13	0.90816	NA	1.81899e-12
DEGS1	NA	0.137282	NA	0.662754	3.97904e-12	0.516291	9.12687e-06	1.7053e-13	0.0196361	6.65485e-08
DEFB118	0.00633395	NA	NA	0.0291842	3.38429e-05	0.322583	8.43556e-11	5.27546e-05	0.0196738	0.168442
CBLC	1.61863e-08	0.195596	3.66931e-08	0.0141837	2.70928e-06	1.25738e-09	0.0101086	0.19998	3.93288e-07	3.1436e-05
ALK	8.5538e-07	1.70405e-06	0.795213	1.12935e-06	1.76222e-07	0.550839	8.83553e-05	0.0209656	1.02278e-05	1.02978e-06
CCL7	0.770135	NA	NA	1.63084e-10	0.0287412	0.0391614	7.42951e-05	4.99352e-09	0.362165	NA
CXCL13	1.78701e-08	0.0117048	1.68601e-06	4.88853e-12	3.41061e-13	0.00108216	6.25278e-12	0.0154234	0.0989971	NA
CBWD1	NA	0.0615666	0.102958	0.000241474	0.563625	1.75317e-07	0.0132076	0.159382	0.520996	1.81899e-12
DEPTOR	0.451014	NA	0.565394	0.0229875	1.60362e-06	8.7145e-06	0.621516	2.897e-07	4.07454e-09	NA
CD5L	1.58673e-09	0.00614941	0.00347524	5.76949e-09	2.28624e-09	0.0076468	1.23623e-09	0.000406319	0.12559	1.43625e-05
AK5	6.93327e-06	0.000367031	1.48076e-05	0.361901	4.58478e-10	9.9476e-14	0.00434659	0.827045	3.90799e-13	NA
DEFB127	9.99854e-05	2.32831e-09	2.00421e-06	9.31323e-10	0.0240016	0.817674	9.99854e-05	4.65661e-10	0.560757	0.00535922
CNNM2	NA	NA	NA	0.151851	8.8005e-08	0.0109135	0.232642	0.00108157	0.0258114	NA
FEZF2	NA	NA	NA	0.0331346	4.65661e-09	0.635953	0.000173949	0.635953	2.28218e-07	NA
AGXT2	1.77636e-14	0.00734124	0.0459877	3.82101e-06	3.79785e-12	5.22519e-08	1.09068e-12	1.32185e-06	0.0890553	0.238847
APOL1	NA	NA	NA	0.0158245	0.0106613	0.86516	0.15352	0.576427	9.67266e-06	5.82077e-11
DDA1	NA	NA	NA	NA	NA	NA	NA	NA	NA	NA
DLX2	NA	NA	0.549682	5.54195e-07	NA	0.00248001	0.450683	NA	5.82077e-11	2.91038e-11
CLDN17	1.42109e-12	7.33562e-07	1.40147e-09	1.00222e-06	5.68434e-14	5.68434e-14	5.68434e-14	0.0128624	4.13897e-08	1.58061e-06
C11orf31	NA	NA	NA	0.00624689	0.96149	0.00319846	7.27596e-12	0.00783459	0.0874627	NA
CXorf22	1.48477e-06	0.00832416	1.33691e-05	0.0668751	0.616033	0.250866	2.04323e-09	1.38176e-08	0.00221014	0.239447
CXCR1	0.192794	7.23091e-10	3.62888e-10	3.06244e-11	2.812e-07	3.06244e-11	1.9121e-09	0.00339901	0.367318	0.0161321
CNPPD1	5.76949e-09	0.946539	NA	0.16657	0.0637581	0.000568127	0.208314	0.0319589	2.45756e-06	1.13687e-13
ANKRD61	0.0816963	0.000126787	0.00646418	0.952841	0.015576	1	1.70859e-06	2.06536e-06	0.000145722	0.0494337
CCL24	0.176611	6.11479e-06	NA	NA	0.0335589	NA	NA	0.0223832	0.377727	2.03727e-10
CRNKL1	0.406724	0.144754	1.15446e-08	5.79125e-06	0.0417039	0.00110871	0.0138772	0.767404	0.000718481	0.00436128
CARM1	0.0394268	NA	0.677999	9.47621e-07	0.0240016	2.32831e-09	7.86968e-08	0.0309219	0.0908182	NA
CLDN3	NA	NA	NA	NA	0.00227884	0.000279941	0.0100058	0.00215903	0.615592	NA
BRWD1	0.00187842	0.0112879	0.0236381	0.000778469	0.00407727	0.2469	1.77636e-14	2.46084e-05	0.177688	0.0184595
CCDC93	0.0240726	NA	6.93327e-06	1.12353e-09	0.185831	NA	NA	0.0030527	0.524871	9.23208e-11
DNASE1L1	2.75872e-05	NA	0.157642	NA	0.294034	0.288691	4.00484e-05	7.59109e-07	4.57032e-09	1.32235e-07
BTBD19	0.92068	NA	NA	0.0192014	0.0165297	5.64977e-06	1.42109e-14	3.84847e-06	3.52518e-05	3.09468e-09
CTSL3P	NA	NA	NA	NA	NA	NA	NA	NA	NA	0.733398
CCT6A	NA	NA	NA	0.000192086	2.50875e-07	0.279851	0.135255	1.41875e-06	0.168373	NA
BTG1	NA	NA	NA	0.178988	0.00248241	NA	0.33766	0.00215149	0.494802	NA
ABCC2	0.00329718	0.00250329	7.24218e-08	9.46872e-06	1.28086e-05	0.000497232	0.00013879	0.103887	0.00499504	0.0131647
C10orf88	0.0117733	3.00224e-09	0.0940749	6.23004e-11	0.00332185	1.35886e-05	0.378468	0.258127	3.18323e-12	1.16629e-06
BPIFB2	0.00846459	NA	NA	2.98138e-08	5.76552e-09	0.0143271	2.64677e-11	0.159803	0.0526272	4.9738e-13
ATP5D	0.0124743	5.20376e-08	NA	1.12649e-05	NA	1.16415e-10	0.00813031	NA	0.00547361	NA
FBXO2	0.447074	NA	0.000653586	0.0139046	0.236918	1.52218e-05	0.118621	0.862427	0.184011	6.99093e-06
COX6B2	0.0483821	NA	NA	NA	0.44656	1.16415e-09	2.76486e-07	NA	1.02445e-08	NA
CTSO	0.00610563	9.54526e-08	4.9738e-13	NA	4.41091e-05	0.000418719	7.10543e-15	0.00449955	3.02889e-07	0.272913
CSNK1G2	NA	NA	NA	7.07805e-08	NA	NA	NA	NA	0.442021	0.182834
BICD1	0.571704	0.000479453	3.29548e-05	1.0367e-07	9.58387e-07	0.170088	0.000714402	1.81899e-12	5.27853e-07	NA
CADM4	NA	NA	NA	0.427418	0.000638723	0.500905	0.344685	0.869667	NA	NA
CACNG7	NA	NA	NA	NA	NA	NA	NA	NA	NA	NA
BC047513	0.720429	0.140633	NA	0.0197197	0.00191337	2.87139e-05	0.000495037	0.95246	3.69794e-05	NA
CYCS	NA	NA	NA	NA	NA	0.0266418	0.0106888	0.000261307	0.000261307	NA
CRH	0.673107	NA	NA	0.505917	0.134736	7.71852e-05	9.02051e-06	0.000246805	0.0228878	NA
CA8	NA	NA	NA	0.0587515	5.96046e-07	0.000139892	0.672075	0.085139	0.936803	NA
ACP2	0.00873949	NA	NA	0.98784	7.10543e-15	0.104421	1.79767e-12	0.0501082	2.28297e-11	0.593396
DBF4	5.44472e-05	0.838029	0.00822465	0.290459	6.11067e-13	0.219851	2.70006e-13	4.41995e-07	2.12374e-05	1.94689e-12
DMRTC1	NA	NA	NA	0.00117213	0.00316053	NA	NA	NA	NA	NA
CDC26	NA	NA	NA	NA	4.09335e-05	NA	NA	1.63913e-06	3.76999e-06	NA
AP3S1	NA	NA	NA	NA	NA	NA	NA	NA	NA	NA
COPS2	NA	NA	NA	NA	NA	NA	NA	NA	NA	NA
DCAF15	0.00862706	NA	2.0573e-08	4.95054e-07	3.56558e-08	0.45429	7.30552e-10	2.50111e-11	0.000145687	6.04393e-08
AP5Z1	0.000932007	0.111261	3.26133e-07	9.00719e-05	0.024749	0.113616	4.18522e-05	2.13163e-14	5.43088e-05	1.54952e-09
CRTC3	0.473073	0.218639	0.424167	1.73832e-06	1.25165e-09	0.00793742	0.0622731	1.98412e-10	0.139336	NA
COX15	0.567026	0.0070407	0.656295	0.0965893	0.321715	0.000179099	0.357059	5.68434e-13	1.47713e-09	NA
AGR2	1.2417e-06	NA	NA	7.27596e-12	7.27596e-12	7.27596e-12	7.27596e-12	0.152639	0.635953	0.0512329
ADAMTS4	2.30053e-08	0.0127105	0.227113	0.027738	0.567158	0.477237	0.00450977	9.7185e-06	0.255137	0.0138772
ENTPD5	0.00222455	NA	0.227588	0.292238	1.8764e-10	3.21364e-05	0.000199356	0.000209532	0.227588	NA
CNTN3	5.20103e-09	0.159101	0.0228877	1.14917e-08	0.091603	6.81931e-06	0.00285026	0.315294	6.35225e-12	0.000535732
ALOX5	0.25533	0.00162086	0.218639	0.00631208	0.412411	0.88286	7.10543e-14	1.35003e-13	1.17752e-05	3.06244e-11
DFFB	7.59109e-07	NA	NA	0.0026081	0.000136164	0.119984	2.28024e-05	6.52335e-10	0.111747	0.0852306
C10orf35	0.00204584	NA	NA	0.0101024	0.133758	0.000464765	5.13752e-06	7.42242e-05	4.57093e-06	NA
CD79A	4.70664e-11	0.0160082	NA	0.439922	4.54747e-13	NA	NA	0.365607	2.30084e-08	1.59162e-12
BC037891	0.0309705	0.920592	0.627285	0.0817138	2.49202e-10	0.00195951	1.38607e-09	1.38607e-09	0.941724	5.45697e-12
C16orf55	2.16824e-07	0.532903	NA	5.82077e-11	8.6322e-08	0.633018	2.16824e-07	NA	0.00451652	NA
DKK1	0.0288793	4.063e-07	0.0619737	0.0081913	6.83826e-05	0.0258143	8.54459e-07	2.00089e-10	3.63798e-12	1.81099e-08
CAMKK2	4.05783e-06	NA	0.60799	0.00174503	0.00174503	0.395596	3.82101e-06	4.86722e-13	2.57366e-10	NA
COQ10B	0.0841903	NA	NA	0.00881438	0.0801322	0.00455699	2.79699e-08	1.15289e-07	1.83395e-06	NA
CREB5	NA	NA	0.000279941	0.000341127	0.20438	1.2348e-05	7.27596e-12	1.81899e-10	0.335188	0.481672
ACVR2A	0.918694	NA	NA	0.411982	0.000607491	NA	0.33766	0.0194731	0.000161171	NA
DDAH1	NA	NA	5.91426e-05	7.53062e-10	0.0221579	0.0054362	0.000526081	0.0213157	3.16359e-08	NA
BRAT1	1.97431e-06	0.188502	1.86864e-08	3.84706e-07	0.281501	0.220889	2.75465e-07	1.13687e-13	0.0142132	2.64164e-06
FILIP1L	0.00024422	0.349084	0.0162316	0.0284305	3.91742e-05	0.0725725	0.0478248	3.45408e-05	0.0257536	1.39927e-05
DIMT1	NA	NA	NA	1.45092e-07	3.41061e-13	2.73172e-07	5.53183e-06	6.51607e-09	0.000274113	NA
DCT	8.26282e-09	1.60514e-06	1.81009e-09	0.000381725	0.0426431	0.0467481	3.43009e-06	0.657006	0.0111229	3.60242e-05
ABCD3	NA	NA	NA	4.62142e-08	9.09495e-12	1.53705e-10	3.74518e-05	1.81899e-12	0.690956	NA
CCDC69	0.00430981	0.0196015	1.08541e-07	0.285443	0.872225	0.166826	0.00088528	0.823761	4.54747e-13	0.00159566
CRYZ	2.1555e-10	0.0117717	NA	2.55834e-06	0.00842063	0.287255	0.0195372	2.0086e-05	0.000888407	0.0183738
ARGLU1	NA	NA	NA	NA	0.000732422	0.167725	NA	NA	NA	NA
C15orf61	0.000772963	NA	NA	0.128775	NA	0.114985	NA	0.00294741	0.0252704	NA
CYP24A1	0.562456	1.63112e-08	5.85221e-09	0.0666357	0.511552	4.13135e-09	0.000122033	0.00075443	9.93037e-10	8.26282e-09
COX6C	NA	NA	NA	7.11414e-07	1.66969e-07	7.36327e-09	0.00127712	0.834057	0.0692398	NA
AMBP	0.000153661	1.0338e-07	0.226452	2.07365e-05	1.47082e-12	0.000932007	0.0197635	0.0112344	3.26133e-07	4.52809e-06
AMY1A	NA	NA	NA	7.27596e-11	NA	0.218852	1.99361e-09	0.633098	NA	2.41822e-05
BNIPL	0.741141	0.0209215	0.0126994	0.436114	3.19146e-09	0.795513	0.00219471	0.593396	0.000497964	NA
CCL11	NA	NA	NA	4.22033e-07	0.690081	4.23483e-10	1.0963e-07	0.103953	9.06552e-08	NA
DCBLD2	2.28297e-11	0.842918	NA	NA	2.73388e-08	9.02943e-10	0.125975	0.0622731	3.777e-07	1.00766e-09
DDX58	1.23671e-05	2.0573e-08	0.697602	2.0573e-08	0.00122944	0.256689	0.733333	0.00685024	0.00128863	NA
ARL3	NA	NA	NA	0.116669	NA	NA	0.19281	NA	0.781952	NA
CCBE1	0.177288	NA	0.0973476	0.638564	2.1246e-06	4.31265e-05	1.64396e-07	0.0437565	0.0132997	0.00530064
ANKHD1-EIF4EBP3	1.82458e-08	0.0741225	3.43009e-06	5.23849e-05	0.6994	0.854475	0.582157	0.00915035	5.21277e-09	0.685156
ATP5L2	NA	NA	NA	NA	NA	NA	NA	NA	NA	0.764648
AVPR2	3.20013e-08	NA	0.00277282	8.43556e-11	1.99775e-05	0.947598	0.246668	NA	0.0149246	NA
ADIPOR1	6.08823e-05	0.00858428	NA	8.93488e-09	NA	0.300029	3.66999e-08	2.03727e-10	1	NA
CYFIP1	0.000444016	NA	0.87057	NA	8.73115e-11	4.29223e-07	0.000334734	2.03727e-10	0.0408839	0.176283
DGCR6	NA	NA	NA	NA	1.78698e-08	0.287218	5.82077e-11	0.158359	0.0174073	0.000355371
ATP5L	1.59778e-05	NA	0.0497101	0.0384184	NA	0.935399	NA	5.58794e-09	0.01546	NA
COLQ	1.53122e-11	3.90799e-13	0.0142861	0.00069009	0.000120996	2.27374e-12	0.0134784	3.55271e-15	0.435333	2.4869e-14
DEFB128	3.72315e-06	7.79983e-09	NA	0.000528623	NA	5.02654e-06	0.0406942	0.0652535	1.10886e-08	3.45608e-08
CCL25	0.988813	0.966447	0.683986	0.0339851	0.833373	1.66893e-06	1.19209e-06	0.0115161	NA	0.207617
AGPAT3	0.0491456	NA	NA	NA	4.58749e-09	1.01158e-07	1.94996e-09	1.09139e-11	1.09139e-11	NA
CDC27	NA	NA	NA	0.576427	NA	0.0033846	2.87141e-05	2.1595e-08	8.14907e-10	0.0624893
CACNG8	NA	6.10352e-05	0.00515747	0.211426	NA	NA	NA	NA	0.19281	NA
CYP11B1	NA	NA	0.0243342	NA	NA	0.88151	1.02781e-05	NA	0.000124067	7.71135e-07
BLVRA	0.00347071	NA	2.02002e-07	0.365043	8.66703e-06	5.09317e-11	2.69938e-09	0.840951	0.000604217	0.518291
ACSM3	0.164507	7.79049e-10	9.93037e-10	5.52349e-09	0.00304106	0.254667	3.67592e-09	1.52761e-05	1.02634e-05	0.000108405
C9orf53	1.19209e-06	NA	0.869667	NA	0.776785	NA	NA	0.000349283	NA	1.19209e-06
CTNND2	1.32585e-05	7.62445e-05	4.14215e-07	0.537762	8.33774e-07	2.27374e-13	0.569879	1.64e-08	0.0727328	NA
CABP5	0.000363648	0.099335	NA	NA	0.247238	0.980084	7.45058e-07	7.45058e-07	1.49012e-07	0.0493469
CTXN1	NA	NA	NA	NA	NA	NA	0.167725	0.541748	NA	NA
EPC2	0.00204487	7.27596e-12	7.27596e-12	0.585588	7.27596e-12	3.62197e-08	0.00116635	0.00227884	0.170191	0.00029913
DNAJB1	0.000207859	NA	NA	1.10589e-06	NA	0.967753	0.279851	0.501361	0.178842	NA
CRISP3	0.729082	NA	NA	0.0106622	1.22213e-12	4.02196e-09	0.0511935	3.97904e-13	NA	0.00160874
CASC5	0.0286183	0.00879597	0.0353485	NA	3.65183e-08	0.00593932	1.10918e-08	7.61149e-06	5.97174e-10	0.746404
FCRL4	0.00013128	0.667002	4.80359e-08	7.92003e-06	0.249111	0.128884	0.065076	4.13318e-06	3.89991e-09	7.27596e-12
APITD1-CORT	0.082547	NA	NA	5.82077e-11	0.346122	1.86265e-08	1.25146e-09	3.30474e-07	0.0126745	NA
CCDC107	2.59388e-06	NA	NA	3.521e-07	2.58582e-07	0.175505	4.26326e-14	4.69527e-09	0.000144621	0.00218382
ACOT6	0.979734	NA	0.0622731	9.02943e-10	9.46435e-05	0.000104434	5.71786e-05	0.268443	0.565507	0.106663
CATSPERB	7.70744e-07	0.182419	1.36147e-10	6.14657e-06	3.54037e-08	0.000161125	8.80955e-08	8.12707e-08	4.9738e-14	9.23208e-11
CRYBG3	0.107934	0.000144148	1.45609e-05	0.210804	2.12944e-05	4.76015e-08	5.3011e-10	4.29331e-09	7.1355e-10	1.87745e-05
CTSC	0.00559719	3.60242e-05	0.511552	0.0134646	2.24402e-06	0.00221271	2.3532e-06	9.38412e-08	0.35911	3.17464e-05
DMRTC2	0.00615118	0.00733457	2.84217e-14	0.000324951	2.58115e-09	0.000519186	0.854056	8.05748e-07	0.0460599	NA
CALN1	NA	NA	NA	0.643142	NA	0.0211271	0.0137793	0.344877	0.330505	NA
C11orf34	0.0651811	NA	0.00141474	3.96924e-08	NA	0.425813	0.853042	9.77707e-12	0.000269145	2.50111e-11
CPNE4	NA	0.028018	0.000427231	NA	NA	0.238572	0.0520806	0.000667766	9.53674e-06	NA
CYP4A22	NA	NA	NA	1.53296e-06	1.0028e-06	0.048429	0.697985	0.00102527	NA	0.31283
CA1	0.00592671	0.00197036	NA	0.439747	0.0146898	NA	NA	1.40147e-09	5.77835e-07	4.10898e-09
DDX47	6.07656e-11	NA	0.630582	1.82638e-10	5.68434e-14	NA	NA	1.36988e-08	7.99525e-06	NA
CR1	NA	NA	NA	0.405972	6.43777e-07	0.00878836	2.32831e-10	5.82077e-09	0.048429	7.68341e-09
APOB	0.181641	1.21166e-09	1.28086e-05	0.00394732	0.000187472	0.406792	6.72492e-10	2.79559e-08	0.00171605	0.0378733
BC049386	0.00878981	0.681575	NA	0.000898782	0.623184	NA	NA	3.25618e-07	1.13687e-12	0.316049
CCDC42	0.0876194	NA	NA	0.000412285	7.17159e-09	NA	NA	0.00459463	1.80179e-07	8.46967e-10
CD93	3.26144e-07	0.00110772	NA	3.96795e-10	0.498385	0.00850174	1.68125e-08	9.67386e-05	0.000124569	9.88645e-07
CNEP1R1	NA	NA	NA	NA	0.12032	4.00376e-06	9.31323e-10	1.89524e-06	1.57394e-07	NA
AP2A2	0.685016	NA	0.0481645	1.30443e-07	0.000569883	0.094499	3.63798e-12	4.3201e-09	3.48027e-08	NA
CNIH2	NA	NA	NA	NA	NA	NA	NA	NA	NA	NA
CCRL1	4.6535e-09	0.514812	NA	0.0341262	3.55271e-14	0.700552	1.90425e-12	NA	1.95399e-13	3.82101e-06
CCL8	6.37281e-06	0.0117048	0.455378	1.21531e-10	2.16005e-12	0.777107	0.000160624	2.21349e-08	0.469527	NA
CTXN2	NA	NA	5.34058e-05	0.00336456	0.000534058	0.000419617	NA	0.000328064	0.00769043	NA
DNAJC21	3.58555e-06	4.25708e-05	NA	7.95808e-12	0.00334469	2.31353e-10	0.304912	1.44252e-06	0.00229719	1.15234e-08
AP4B1-AS1	7.44784e-06	7.42951e-05	NA	0.0597654	1.81899e-11	0.991368	2.84217e-14	1.56093e-06	1.81899e-11	5.55698e-09
ACTL6A	NA	NA	NA	0.0714111	0.0109863	0.00933838	0.03479	NA	0.0886536	NA
C16orf58	0.128844	7.10543e-15	3.93411e-07	NA	0.97641	0.000191613	0.201316	0.280966	6.26425e-10	0.905844
C17orf50	9.96806e-10	0.537113	NA	NA	0.286757	1.00399e-06	0.463892	0.00267453	0.0175708	2.64116e-05
ATP5E	0.0195572	NA	NA	0.259452	0.0276742	0.776785	0.0148652	NA	2.38419e-07	0.286143
CXCL14	NA	NA	NA	0.000781945	1.16415e-10	0.0408248	0.00248241	0.00579912	0.0342672	NA
FBXO5	0.00719383	6.81931e-06	0.00586021	0.00147314	0.904053	0.987456	0.0050971	9.67386e-05	1.1532e-09	0.0287255
BAZ1A	2.84217e-14	2.82095e-05	0.0295367	0.0279333	9.9476e-13	0.000167599	2.84217e-14	9.9476e-14	0.633185	3.55271e-13
C9orf57	0.0115869	0.196924	NA	0.0310127	0.000433579	0.000121229	2.91038e-11	2.87139e-05	0.846344	NA
CYTH2	0.0123596	NA	NA	NA	NA	NA	NA	NA	0.0401306	NA
ABI3BP	0.284591	NA	2.04165e-06	9.52775e-05	0.0083778	0.000316039	0.0342295	0.00674238	0.63257	3.60788e-10
BTG2	0.000646785	NA	0.150235	NA	9.31919e-05	0.0628139	1.51396e-05	NA	0.150235	NA
DDX28	1.05445e-11	0.573318	0.0597654	1.81899e-11	1.56319e-12	3.97904e-13	3.14551e-06	0.0106622	0.0117717	0.00081383
ANKRD20A4	NA	NA	NA	2.46505e-06	0.00119583	0.323383	1.45519e-11	1.45519e-11	NA	0.881509
CACTIN-AS1	NA	NA	0.00064981	NA	NA	NA	NA	NA	NA	3.57628e-07
COX7A1	8.96427e-06	NA	0.0233361	1.29855e-05	0.000250711	0.00268114	0.267707	0.643775	0.00917164	NA
ASB18	1.35247e-05	0.0478937	1.92784e-07	5.12227e-08	NA	NA	NA	0.479773	7.78167e-05	8.41916e-07
CMKLR1	8.73003e-06	0.640682	0.140951	0.000357322	0.001359	NA	NA	0.765088	8.56793e-07	1.33136e-05
BC031638	2.91038e-10	NA	NA	NA	NA	NA	NA	7.52741e-07	0.00125321	0.350705
BMPR1A	NA	0.426539	NA	3.24848e-05	6.86325e-06	0.000249561	0.302114	0.0205008	0.117209	0.295618
ARFGAP3	0.203198	2.56932e-11	NA	0.88814	0.016224	0.837109	0.0059358	7.62046e-09	0.0360483	5.68434e-14
C15orf62	1.74358e-07	0.0182305	NA	0.234157	5.65933e-10	3.58555e-06	7.95808e-12	7.33091e-06	3.17266e-09	NA
ABHD17A	1.21836e-05	4.65661e-08	9.31323e-09	3.14787e-07	3.79048e-06	0.000666553	0.000554826	NA	9.31323e-09	NA
AQP6	4.61604e-11	0.212102	NA	0.0715742	2.99664e-06	0.621881	3.21165e-12	NA	0.280966	3.36711e-05
CD33	0.460854	NA	NA	0.967753	8.6322e-08	0.20706	4.56342e-06	0.00152279	0.00125321	0.000476979
AGR3	1.55997e-08	NA	NA	0.0770005	0.000763812	0.750328	0.354211	2.32694e-05	9.35106e-08	NA
CYB5R1	NA	0.000430545	NA	0.361368	0.00138841	0.175482	2.23909e-08	0.433286	7.92629e-06	NA
COMTD1	0.000469678	NA	NA	7.1999e-09	2.10889e-11	0.0425533	0.0209106	0.0425533	0.238471	0.302187
CCL26	0.00135648	NA	NA	NA	7.09668e-07	NA	NA	NA	NA	0.00200036
DBT	6.25278e-12	NA	0.00792521	1.34742e-05	0.00550251	6.47049e-10	2.84217e-13	0.00112697	7.47958e-06	2.75465e-07
ALG9	2.27374e-13	0.759441	NA	1.78701e-08	0.0589721	3.85797e-06	0.00979867	2.73247e-08	0.000210477	NA
ABCB5	3.18358e-07	1.16073e-06	8.37707e-08	0.294512	2.62376e-09	0.00549856	5.87423e-05	0.000610925	0.000339743	2.70717e-12
C10orf53	NA	0.0739136	0.116669	0.000427246	NA	NA	NA	0.93988	NA	0.375458
APOA2	NA	0.135442	0.588184	0.696773	0.0823483	8.52651e-14	2.84217e-14	7.47245e-07	0.000778709	NA
FBXO39	0.00685024	4.52967e-07	NA	0.00585215	6.03812e-06	0.00106628	0.251644	0.0707822	0.0566448	4.70664e-11
CASP3	0.0528805	NA	1.40556e-06	0.000428562	8.56793e-07	4.37894e-06	0.505088	0.465582	NA	NA
ARHGAP26	1.1378e-06	0.0194701	NA	2.87628e-11	0.00518705	4.46128e-06	0.00193428	4.88853e-12	3.41061e-13	1.59162e-12
CLDN4	2.62492e-07	NA	NA	1.13687e-12	0.026503	1.86747e-05	3.78557e-07	0.000163285	1.0748e-05	NA
ARHGAP10	0.00024422	NA	8.27893e-10	0.137119	0.0120782	1.19015e-09	0.00771476	4.44909e-07	NA	0.900134
DEFB129	2.86718e-10	2.06497e-06	0.0019482	0.0028952	0.760512	0.099653	0.529874	1.26862e-06	NA	NA
ABCG8	0.000586433	9.18365e-06	2.95613e-08	4.81092e-05	5.46118e-06	1.52767e-13	3.55271e-15	0.37389	7.7566e-10	0.000610925
CACTIN	2.27374e-13	8.68341e-06	0.733333	0.498909	NA	NA	NA	1.98145e-07	0.00141474	4.48234e-06
ASH1L-AS1	NA	0.22919	0.000742316	0.0105078	NA	0.0893732	0.0893732	0.00224578	0.113961	0.00533044
DGCR8	0.00347524	NA	NA	0.00438616	1.58061e-06	0.00284897	5.68434e-14	0.000273507	0.00361426	NA
CLDN18	NA	0.730753	0.615592	0.0568386	4.17494e-08	7.778e-09	8.00355e-10	8.27422e-08	2.07932e-06	NA
C17orf72	2.84217e-14	1.51914e-11	1.42109e-13	2.39133e-07	1.26505e-08	0.000112656	8.15945e-10	0.0320868	6.44866e-08	1.42109e-14
CA9	4.37894e-06	NA	9.09495e-12	0.391877	4.76432e-07	4.89061e-05	2.40163e-12	0.00397091	0.0215972	7.10543e-14
APLF	1.5226e-06	0.0215219	0.979734	0.000616144	9.32816e-06	0.0030527	0.0176113	2.24389e-10	1.23563e-11	2.88492e-09
ASAP1-IT1	0.539189	0.539189	NA	0.0595074	0.0157804	0.000607491	0.73347	0.891732	0.103214	NA
CCDC61	1.72305e-06	0.000666972	0.00336109	0.00181881	NA	0.0120916	1.84136e-07	0.000233964	0.000558521	3.3473e-06
ARL4A	NA	NA	NA	NA	0.0201569	0.0109863	0.0201569	NA	0.00933838	NA
CABP7	NA	NA	0.101562	0.0673828	NA	NA	NA	NA	NA	NA
DNAJC4	0.528429	0.0268022	NA	0.00393332	4.80601e-05	0.0656959	1.43763e-08	1.26568e-05	0.0044333	0.357059
FCER2	1.13687e-13	NA	NA	0.00048005	0.0144094	0.647952	0.0144094	NA	0.00162361	1.43359e-10
ADRA1B	0.302114	0.00716162	2.77214e-09	0.00124634	0.235693	1.56249e-06	0.0239271	NA	0.00596562	NA
ARMCX2	0.00173684	NA	2.1246e-06	3.54144e-07	1.13687e-13	7.33562e-07	1.18481e-05	2.83846e-06	3.26168e-10	NA
CCNE2	2.99676e-07	0.0671404	0.670897	4.17705e-07	5.68434e-14	0.0515803	0.0437565	1.58673e-09	0.0502021	NA
C10orf54	0.328523	NA	NA	0.671224	0.00373574	0.985699	0.0100241	0.000129841	0.00106628	0.00585215
ACTN1	NA	NA	NA	NA	0.0770005	0.0362694	NA	0.00220594	7.36327e-09	NA
CTXN3	NA	NA	NA	0.151072	0.000127792	0.709014	0.940555	0.259452	0.822927	4.76837e-07
ATP5SL	NA	NA	0.687295	0.728911	7.22926e-05	0.143428	0.156336	1.84858e-05	0.45317	3.97904e-13
AIG1	NA	0.0555976	NA	2.56114e-09	NA	5.92263e-08	7.19048e-05	3.98722e-09	0.0442212	NA
COPS3	NA	NA	0.229309	6.10352e-05	NA	NA	NA	NA	NA	NA
COL10A1	7.10543e-15	2.95613e-08	0.123849	6.73748e-09	9.77353e-08	0.0890553	1.17799e-09	0.0731874	0.00421715	5.26121e-11
DLX3	NA	NA	NA	0.0105078	0.0248636	NA	0.00350428	0.000175476	0.583806	NA
ACTR8	0.261265	NA	NA	8.00355e-10	NA	7.24031e-08	2.54037e-06	0.00193611	0.128884	NA
CTLA4	0.00220117	NA	3.58739e-09	0.0573816	0.598826	0.768259	0.000556636	0.00911553	1	NA
AOC3	0.750062	NA	NA	4.02078e-07	5.92535e-05	0.275352	0.0680811	0.000142728	0.000104191	3.46693e-09
ATP5F1	NA	2.77121e-08	1.4525e-06	1	1.28864e-09	1.98952e-13	3.97904e-13	0.0010564	7.44784e-06	3.22797e-09
CXCL16	3.52922e-06	0.24266	0.00316446	3.04041e-05	9.48504e-07	1.33206e-06	3.05533e-13	0.226452	2.12157e-09	2.812e-07
BC038245	0.000364992	NA	NA	0.203179	NA	0.664522	0.0184315	4.02145e-06	0.00017778	0.637883
DHRS7C	2.10889e-11	NA	0.0196361	0.501889	0.000260049	1.46652e-06	1.46652e-06	NA	0.00173684	NA
ALG12	7.5957e-12	2.88492e-09	8.08399e-10	6.98511e-09	NA	4.56477e-08	2.812e-07	7.10543e-15	0.448248	0.00105199
FDXACB1	4.09008e-08	0.0285088	1.59664e-08	0.0946981	3.82504e-10	7.79216e-07	7.6646e-10	0.305586	1.60613e-09	7.59111e-05
CD44	9.34705e-10	4.13135e-09	0.706562	0.0238916	0.00344519	6.01468e-07	0.254667	0.0134646	6.95667e-09	0.266944
ATG14	8.94033e-08	0.88482	0.0874627	0.357397	3.63798e-12	2.52912e-06	0.134728	0.468025	2.54659e-10	0.189442
CUL4B	0.379637	NA	NA	1.81899e-11	3.63798e-12	0.000219258	3.63798e-12	1.20053e-10	0.00046626	NA
DKK2	NA	0.0629318	NA	8.00355e-10	0.00022888	0.320853	0.00571373	3.63798e-11	1.00399e-06	1.87886e-06
ATF5	0.101706	8.66703e-06	NA	0.0295587	0.0844206	4.62143e-05	0.741572	0.125213	0.16567	0.615592
ASAP1	NA	NA	0.00222455	NA	3.97904e-13	0.000969116	7.10543e-13	0.022054	1.28864e-09	3.60502e-05
CCL27	0.000642613	0.954284	0.1748	0.656587	0.575736	4.99497e-06	0.437905	0.00544307	1.69627e-06	NA
BSX	0.0180979	0.024323	0.00056425	6.50471e-09	8.27297e-05	NA	NA	6.03568e-05	1.45519e-11	NA
DDAH2	NA	0.000604217	NA	NA	NA	2.29925e-06	0.0190867	9.96806e-10	7.778e-09	NA
ADAL	NA	1.17666e-11	2.44427e-12	7.99525e-06	0.0132997	2.82967e-10	0.000406319	0.00197036	0.0559022	8.41794e-10
C14orf119	3.63798e-12	NA	NA	5.09317e-11	7.40329e-09	0.00111565	0.0049485	0.0182133	0.302114	NA
CNFN	0.0447693	0.00790405	NA	0.000152588	1.52588e-05	0.0983734	1.52588e-05	0.000213623	0.00463867	NA
CCL13	3.60475e-09	0.000267921	0.0113912	2.38646e-06	5.03629e-06	0.000744968	0.170205	9.36888e-09	0.0823483	4.94254e-11
COX7A2L	NA	NA	NA	0.098183	4.00376e-06	0.289921	4.65661e-09	0.000118391	0.00359718	NA
DIO1	0.000970433	NA	0.598869	0.0165842	0.0185335	0.328334	0.010864	0.251726	0.00394818	0.0214342
CYP4X1	0.283938	NA	NA	7.79049e-10	NA	7.79049e-10	2.46746e-06	0.2166	8.27893e-10	8.79719e-10
BLVRB	0.00146592	NA	0.104837	0.0190867	3.63798e-11	0.897361	2.18279e-11	0.0142236	0.231613	6.6002e-06
CSNK1G3	NA	NA	NA	NA	8.05855e-05	0.000693798	0.0461602	0.00323915	0.000504494	NA
ATG5	NA	NA	NA	5.09614e-06	NA	0.110988	0.32595	4.56342e-06	0.00451652	NA
BC032415	0.701181	NA	NA	NA	NA	NA	NA	NA	NA	4.76837e-05
C17orf53	0.884869	0.77952	0.0232975	0.0624506	0.00401887	0.00251545	0.992298	1.59078e-07	7.79049e-10	0.976897
BTN2A3P	NA	NA	NA	0.561766	NA	0.00585215	4.90616e-08	0.000137555	8.68341e-06	1.13687e-12
ASH1L	0.30165	0.202581	1.51319e-09	0.000283825	0.0321109	4.97117e-06	0.953813	0.00593802	5.7049e-06	0.297155
APOL2	NA	NA	NA	0.12719	0.662777	0.0423653	1.12952e-06	0.0104413	0.00300382	9.7225e-10
BTG3	NA	NA	NA	0.00379839	1.60187e-07	0.000174291	0.0533759	3.72529e-08	0.229707	0.000735912
FBXW5	0.394207	0.287781	0.731629	0.000880576	0.301699	0.000188566	0.720429	3.0349e-06	0.411105	0.0253449
CBWD2	NA	NA	NA	5.84589e-05	0.910046	2.69174e-08	0.0481645	0.178696	0.276596	1.81899e-12
BTBD1	3.83938e-07	NA	NA	0.294711	7.84366e-06	0.13966	0.827161	2.897e-07	0.000262463	NA
CD79B	0.00649696	0.0377435	NA	0.725389	1.98952e-13	0.81353	9.38201e-11	0.0555995	0.000490237	NA
CRHR1	0.536042	NA	NA	1.45092e-07	3.75167e-12	5.10427e-05	6.78285e-08	0.986175	1.1378e-06	2.80238e-09
ANGPTL1	0.680814	NA	NA	7.44784e-06	0.00354616	4.35934e-07	0.0843339	0.403745	1.14836e-08	5.68434e-14
C12orf57	NA	0.900659	NA	NA	4.17233e-07	5.96046e-08	9.83477e-07	2.98023e-08	0.0558532	NA
DDIT3	3.18323e-12	NA	0.0217607	0.133783	3.05929e-06	0.0550519	0.000269145	0.00358216	0.00315448	NA
ASIC5	0.193113	NA	NA	2.00506e-05	0.678697	1.06868e-07	2.24466e-09	0.20427	4.69527e-09	2.47127e-11
COQ2	2.03272e-10	1.25738e-09	NA	0.00935589	0.852773	0.00317837	2.49616e-06	4.68657e-05	0.00304043	1.36424e-12
ARAF	0.204434	NA	NA	8.6402e-12	8.19723e-07	0.115845	1	4.52792e-09	0.000243993	NA
CUBN	0.00744789	0.00744789	0.00560805	0.000251882	9.24754e-07	9.03649e-10	5.3011e-10	5.3011e-10	4.76015e-08	0.00406636
CMTM7	0.00269635	NA	0.0110142	0.779347	NA	NA	NA	2.32831e-08	1.86265e-09	NA
CAD	0.120828	2.59152e-06	6.65176e-05	NA	0.428327	0.000402432	4.88737e-06	4.54295e-09	0.00431426	9.03649e-10
C11orf82	0.158723	6.42975e-05	0.000142728	0.750062	2.28942e-07	0.235088	7.79049e-10	0.0345095	8.27893e-10	9.93037e-10
COX17	0.418041	NA	NA	0.066288	NA	0.00823212	9.53674e-05	0.00141144	0.312408	NA
DNAJB2	5.90808e-09	NA	NA	0.000685358	5.17639e-09	0.911346	0.511412	0.0446366	0.901542	NA
AJAP1	1.14582e-05	0.0106433	0.895725	NA	0.171134	0.994497	0.0221579	3.63798e-12	6.91216e-11	3.50698e-05
ARL6IP5	NA	NA	NA	0.0334102	2.27094e-05	0.00093478	1.2815e-06	3.18587e-05	NA	NA
AADAT	0.733174	4.14948e-06	0.000128803	1.02773e-10	1.92131e-11	0.134736	0.000274113	1.05031e-06	0.0154234	2.27374e-13
CTSS	0.312736	0.328704	1.48453e-05	0.16344	0.00292826	0.409906	8.52651e-14	1.41483e-10	0.00181895	NA
ADIPOR2	6.66477e-05	0.828663	1.42109e-13	2.07862e-08	3.12639e-12	9.1319e-11	2.84217e-14	3.36755e-06	5.78382e-11	NA
AMY2A	NA	1.21872e-10	0.164705	7.50333e-12	NA	1.80179e-07	2.00089e-11	0.890693	NA	2.0573e-08
FBXO30	0.98784	NA	0.000728458	1.00766e-09	1.39881e-05	0.479393	1.21114e-07	3.8552e-08	0.0102344	NA
AGPAT4-IT1	3.8147e-05	NA	0.392738	NA	0.246208	NA	NA	NA	NA	0.000106812
C12orf43	0.00264343	4.36273e-12	0.0170369	7.02355e-08	0.00159583	7.41483e-07	4.56595e-11	4.17583e-08	3.93523e-05	NA
CYP11B2	NA	NA	NA	NA	NA	0.0148033	2.00421e-06	NA	0.021624	4.59654e-06
CASR	9.80618e-09	NA	0.77952	0.846908	6.54166e-06	0.315407	0.0114336	0.30165	0.0875194	1.34223e-09
CYP2B7P1	NA	NA	NA	0.005323	1.3864e-06	NA	NA	2.23132e-05	6.4623e-06	1.63497e-07
CNIH3	0.786865	NA	NA	NA	0.0170898	NA	0.000244141	0.375732	0.00341797	NA
ANXA7	0.000606359	7.28604e-06	0.569232	0.938298	0.000255755	1.51986e-07	4.37354e-09	0.000495096	0.996367	0.719054
CLCN6	0.27305	0.768259	0.299441	0.536042	0.0605983	0.363174	0.70721	0.216227	0.010526	0.559202
C9orf64	0.000172795	0.00406052	0.476319	0.0599431	NA	0.104813	0.862427	0.00373574	0.569879	NA
CALR3	3.87287e-07	0.207634	0.000152057	0.363174	4.8999e-10	0.000102858	3.17266e-09	NA	2.27374e-13	0.00201984
AGRN	0.580729	0.00341403	9.02049e-06	0.000622848	NA	3.0461e-08	0.0424948	NA	5.55698e-09	1.71032e-08
AP4B1	0.010892	4.9738e-13	1.42109e-14	5.39483e-08	0.923098	0.923098	0.64363	0.505119	0.00720064	6.66493e-05
DIS3L2	0.511552	0.511552	0.199182	2.46746e-06	0.00089783	4.92208e-08	2.79542e-05	2.45952e-05	0.000154275	1.12054e-09
ARL14EPL	1.50565e-07	NA	0.318336	0.153031	5.68434e-14	9.03482e-05	5.68434e-14	5.68434e-14	4.57222e-05	NA
ASPHD1	0.000194436	7.81277e-06	NA	4.18522e-05	0.0012833	0.150774	1.77636e-13	0.0152065	2.13163e-14	NA
ASB1	7.73109e-05	NA	NA	0.0345337	NA	0.197625	3.72529e-09	0.000668768	0.0919584	NA
DNAJC11	0.0011257	NA	NA	NA	1.60071e-09	NA	0.00720582	6.25732e-10	7.79983e-09	0.428414
CD5	0.192351	2.5762e-09	4.311e-10	0.212448	0.646587	0.0132997	2.13302e-07	0.000139463	2.0935e-05	1.13687e-13
CYP2R1	0.00832119	0.00106661	0.159104	8.34545e-07	3.85386e-09	0.000636345	8.84062e-09	3.53744e-11	0.00941395	7.29882e-07
ADAP1	0.069227	NA	0.0552031	0.33614	0.238572	0.696386	6.3315e-05	NA	0.00125264	0.0905648
CCNB1IP1	0.000561756	NA	NA	0.157416	2.27374e-13	4.83198e-06	2.27374e-13	3.30503e-06	1.13687e-12	0.425813
CNGA1	3.75762e-06	0.00155957	NA	0.230431	5.14554e-10	0.0465161	0.454385	0.6291	3.75762e-06	2.64677e-11
ACVR2B	NA	NA	NA	2.4274e-05	1.60187e-07	0.00254207	0.536151	2.6077e-07	0.143254	NA
ARL4C	NA	NA	NA	NA	NA	NA	NA	NA	NA	NA
BC039399	1.17812e-07	NA	0.0945442	0.00879817	3.06126e-06	NA	NA	0.0872079	0.000772963	NA
AWAT1	0.539285	NA	NA	9.9476e-14	5.16081e-05	1.42109e-14	1.79199e-11	5.29354e-11	1.42109e-14	5.42807e-08
BORA	3.41744e-07	NA	NA	0.000159755	2.29306e-10	0.107526	7.10543e-15	1.76784e-09	0.851431	1.31806e-12
APOA4	0.685288	0.474675	NA	0.350583	8.638e-06	0.0929133	0.260714	7.96337e-09	6.46007e-07	7.43626e-07
CPA2	7.10543e-15	0.0332657	0.112009	4.51784e-10	1.76854e-11	0.044884	0.0332657	1.78399e-07	3.2324e-10	1.90425e-12
CSAD	8.52651e-14	NA	0.948241	0.820237	2.07445e-06	3.81681e-05	1.94656e-07	6.17882e-09	0.000374768	0.00154369
AGPAT4	2.30409e-06	NA	NA	0.00291552	0.000266716	0.271868	1.14485e-05	0.330267	NA	0.0129718
DHPS	0.118902	NA	NA	0.203198	1.81899e-11	4.78405e-05	2.84217e-14	NA	5.40012e-13	5.44588e-10
CABS1	0.107032	0.00153338	8.31945e-08	NA	4.26326e-14	2.38085e-05	1.42109e-14	2.47127e-11	NA	4.17583e-08
DNASE1L2	3.05929e-06	0.0100241	0.0120438	4.62705e-10	7.65439e-07	2.41987e-06	5.68434e-12	0.251644	0.0616498	NA
APPL2	5.13508e-05	NA	NA	4.04355e-06	9.5821e-10	0.364053	5.68434e-14	6.53944e-06	9.88507e-11	NA
CCM2L	0.026229	5.9735e-06	1.86265e-09	0.00403179	0.00256009	3.72529e-09	1.21836e-05	2.6077e-08	0.0698929	6.91786e-06
CCDC43	NA	NA	NA	0.520561	0.0704403	0.511604	1.15969e-06	0.0682415	0.138457	NA
COX18	8.03215e-09	NA	NA	0.0905809	0.00438616	1.58061e-06	1.36988e-08	0.712162	0.286582	NA
CBY1	NA	NA	NA	0.326788	NA	NA	5.72504e-08	6.23004e-11	4.54747e-13	NA
DDX19B	NA	NA	NA	NA	0.00621199	0.207683	0.419708	2.03137e-05	0.140633	NA
ARHGEF40	0.00611536	0.00285566	7.79049e-10	7.80295e-09	0.000226421	9.93037e-10	7.79049e-10	0.139689	0.824294	7.79049e-10
AEBP2	NA	NA	2.0504e-05	3.33786e-06	0.923966	0.00285149	0.00831604	0.353498	0.0301175	NA
DDX49	0.0134059	0.0766136	2.88787e-09	1.88614e-08	0.0059358	0.138361	0.00167625	NA	4.78405e-05	NA
DNAAF2	1.98952e-12	2.84217e-14	0.391589	0.845574	NA	3.89377e-12	3.34619e-08	9.87317e-08	4.79105e-10	5.68434e-14
DERA	5.27687e-05	0.464173	1.53705e-10	0.137319	0.0092576	1.14687e-09	2.79215e-10	0.368211	4.38071e-07	0.000168143
CXXC11	0.000368364	0.442021	0.00254207	NA	0.66995	0.00556603	3.72529e-09	NA	0.000607122	1.38208e-06
C12orf5	0.0367468	NA	NA	0.107032	1.53013e-08	0.143863	1.6142e-06	0.143863	1.33136e-05	NA
DLGAP2	0.00102219	0.16729	NA	0.00010859	0.0214342	0.0159748	0.291311	0.472078	9.39666e-07	5.21868e-09
CMTM8	0.427955	4.40758e-05	0.140283	NA	0.00347516	NA	0.0185295	0.212933	0.00501261	0.308521
ABHD17B	NA	NA	NA	0.00896454	0.00400543	0.212143	NA	NA	0.0665359	NA
CLDN5	0.00028911	NA	0.0419578	0.399052	0.00304043	0.00304043	0.131299	0.0294936	4.00178e-11	NA
ACP5	5.07832e-05	NA	NA	NA	3.76531e-10	0.00791797	1.1635e-07	NA	NA	1.67158e-05
CLDN19	0.00544307	5.18427e-07	NA	0.698618	6.32572e-08	9.17498e-09	5.80279e-07	0.118111	1.07902e-08	NA
BMP2K	0.00364891	2.42103e-07	3.54037e-08	NA	7.10543e-14	0.00188829	1.98412e-10	1.68754e-11	5.86081e-08	NA
ARID3A	0.00146418	NA	0.72052	1.57172e-10	NA	4.10898e-09	5.68434e-14	0.000595503	5.13865e-11	NA
CXCR2P1	NA	NA	NA	2.13637e-05	5.75255e-11	0.00441007	1.10877e-07	0.957116	1.00402e-07	5.60317e-09
ACOT7	0.484521	NA	0.000426608	0.000170298	NA	0.114966	1.85863e-06	0.000248168	2.84317e-05	NA
ACSF2	0.00091228	NA	0.285434	1.08724e-06	0.000476849	0.540674	0.495838	0.156153	0.0438024	1.78535e-05
C14orf166	0.000193685	NA	NA	NA	0.00316053	NA	0.813923	7.96467e-06	0.493234	NA
CYP4B1	NA	NA	NA	8.84062e-09	0.70788	0.204867	1.50061e-08	8.2718e-05	0.0853129	0.00144807
ARL6IP6	0.0116138	NA	0.938088	9.12883e-05	6.75184e-05	0.787984	4.36987e-05	0.0410441	0.398385	0.236918
C11orf35	1.78945e-06	0.141295	4.54747e-13	0.252884	0.258127	0.0394134	1.12018e-08	0.237594	0.0735656	4.54747e-13
CCPG1	0.00873949	0.412411	1.5455e-10	3.02889e-07	7.10543e-15	0.0431392	1.12353e-09	0.00227797	1.42109e-14	NA
DEGS2	0.00254038	NA	9.77766e-08	0.970396	9.09495e-13	0.00231899	1.68464e-05	5.17639e-09	1.95541e-11	0.218218
ABCA4	5.71093e-07	0.811087	1.72553e-05	8.46449e-08	0.00242685	8.91465e-08	1.7349e-07	0.262659	0.016624	0.016624
AIM1L	0.697277	7.48589e-05	0.114238	NA	0.0153912	0.000261256	0.169686	0.22124	4.69836e-07	9.03649e-10
ARRB1	2.08616e-07	NA	NA	0.000590742	0.257823	0.149909	NA	4.08292e-06	0.0110453	NA
DHX58	2.28942e-07	NA	0.831817	1.81873e-05	0.00149358	1.22587e-05	8.20305e-06	0.0666357	1.52761e-05	0.000317395
CA2	0.615688	NA	0.000142728	8.51525e-07	7.79049e-10	4.92208e-08	0.757394	9.34705e-10	0.0379444	4.67942e-07
C14orf132	NA	NA	NA	2.08616e-07	NA	0.257823	NA	2.98023e-08	5.03659e-06	NA
DFNA5	9.52775e-05	0.019975	1.4888e-05	1.37654e-07	0.00331425	3.2202e-05	0.00372505	0.514953	6.44913e-10	1.829e-05
C16orf11	0.0801322	0.028391	4.06673e-05	3.01983e-05	NA	7.38567e-10	0.0116241	1.82638e-10	0.0116241	1.84858e-05
CAMK2A	NA	NA	NA	NA	NA	NA	NA	NA	NA	NA
COPS4	NA	NA	NA	NA	0.00262451	NA	0.0150757	NA	0.00427246	NA
CTBP1	NA	NA	NA	NA	NA	NA	NA	NA	NA	NA
ACTL6B	NA	NA	NA	NA	NA	NA	NA	NA	7.62939e-06	NA
ADGB	0.000325916	1.18167e-05	3.37508e-11	0.172129	1.42109e-14	1.42109e-14	5.06887e-10	7.81597e-13	0.0235572	8.73065e-05
AV1S4A1N1T	NA	NA	NA	0.0104413	9.09495e-13	NA	NA	0.0451687	0.235941	NA
AK7	0.0961543	0.583453	3.16703e-07	0.000336625	5.3011e-10	1.28453e-09	0.181641	0.114238	0.13736	5.3011e-10
CPNE5	NA	NA	NA	0.000247524	0.735656	0.82635	0.000290827	5.79166e-07	0.0205848	NA
CNIH4	0.122669	NA	0.00052461	NA	0.394073	NA	NA	6.16908e-06	0.000190288	0.0312207
BTG4	1.18167e-05	NA	NA	0.0001071	2.79497e-07	0.452798	2.47127e-11	0.870931	1.68125e-08	NA
CCT6B	4.52388e-05	NA	NA	0.2119	0.0154234	0.0117048	0.00758637	7.95808e-13	1.00044e-11	2.80238e-09
AASDH	0.840285	0.951417	1.91959e-07	0.0378733	1.65403e-05	1.15362e-07	8.51945e-10	2.01892e-07	2.16445e-09	5.62668e-10
ADCY4	0.00970598	0.0075762	8.98837e-13	5.87423e-05	0.60799	0.000191613	0.56048	6.73748e-09	1.2675e-10	NA
BC040304	8.04372e-07	0.944335	0.00816422	1.02431e-06	0.715245	0.570664	2.91038e-11	0.1477	0.0621176	NA
CD2BP2	6.73062e-05	NA	NA	3.60625e-06	1.42109e-14	0.00672235	7.10543e-14	4.36273e-12	0.694137	6.11067e-13
DEFB130	NA	NA	NA	NA	6.55651e-06	1.13249e-06	NA	0.0366821	NA	NA
CAPN9	0.672121	NA	NA	NA	1.25995e-05	2.27926e-05	0.0192252	0.000600494	0.291311	NA
CD34	0.00140234	0.200219	0.44643	1.08002e-12	5.68434e-14	1.23322e-08	4.64684e-06	0.831823	0.991083	0.000426517
DLX4	0.0169222	0.672929	NA	NA	0.0196115	0.0138298	0.0226545	NA	7.2422e-06	NA
FFAR1	NA	NA	1.11051e-05	0.0167369	4.311e-10	0.00181176	1.26088e-07	6.44815e-09	0.591317	7.1999e-09
CCDC6	NA	NA	0.000418397	0.700033	0.000123337	0.0497101	1.86265e-09	0.745655	0.967674	NA
COMT	0.00142064	0.0766136	4.94254e-11	4.02196e-09	0.223387	0.106342	1.01358e-09	4.99352e-09	0.150511	0.14434
DDB1	0.0102569	NA	0.170906	NA	NA	0.582386	NA	0.831373	2.38046e-05	NA
ATF6B	0.0103421	0.0515623	0.47856	0.138085	2.39552e-10	0.00908051	0.000325916	2.84217e-14	6.11067e-13	1.85141e-06
DGKK	2.40163e-12	2.39552e-10	0.121802	1.42109e-14	1.42109e-14	1.26505e-08	0.000101798	NA	0.232073	0.00186916
CCDC108	0.467567	1.0164e-09	5.97174e-10	0.000497232	0.000155452	1.21166e-09	5.3011e-10	0.385917	5.97174e-10	6.33742e-10
ARL4D	NA	NA	NA	NA	NA	0.733209	0.0655152	0.798276	NA	NA
ALKBH1	0.0179493	0.447088	1.77636e-14	0.0142861	0.0315993	2.37952e-09	7.10543e-15	6.14738e-09	0.00020964	NA
BOC	0.00128286	0.00904072	0.175588	0.0888896	1.52973e-09	0.150199	1.91959e-07	0.00207569	0.313624	7.1355e-10
AMBRA1	0.0750025	NA	0.787679	0.00294446	2.19163e-05	0.123425	1.44595e-11	0.000824555	0.340731	9.73444e-13
CCBL1	0.109392	0.121802	0.618301	0.00235829	1.61762e-10	0.0836071	0.000223899	0.00369266	0.00878696	1.8866e-07
ANKRD34C	0.00424445	NA	0.646304	2.44373e-06	0.847156	0.131558	1.30443e-07	0.931152	2.44852e-05	8.13088e-10
CCDC33	8.27893e-10	0.00170503	0.0044034	0.629334	1.03803e-08	2.28942e-07	5.44951e-06	8.88319e-05	5.19659e-08	4.66165e-08
DIO2	0.000181489	0.704688	8.69366e-07	0.000798407	1.27329e-11	0.562668	2.03963e-07	2.69756e-09	0.124716	0.192196
ATP5G1	5.82725e-05	0.897361	NA	0.00193611	0.87472	1.38243e-10	3.63798e-11	1.81899e-10	0.00725158	NA
ADRBK2	0.192737	0.347917	0.155533	1.00044e-10	0.898007	0.028404	0.0031457	0.000288144	0.0673315	NA
BTAF1	4.9738e-14	NA	1.44517e-09	1.59894e-09	1.12202e-10	1.78535e-05	0.447088	2.06617e-07	0.81297	NA
FCHO1	0.0134059	0.0729709	0.00412127	1.08966e-05	NA	0.745419	0.00174629	2.84217e-14	4.20897e-10	0.118902
C10orf90	0.568987	5.7212e-07	1.26396e-09	0.018989	0.0638208	0.824294	5.68744e-05	6.32265e-07	2.3532e-06	0.636206
AQP7	1.91631e-09	NA	2.87628e-11	0.606899	0.0070407	0.505917	7.71852e-05	1.1836e-05	0.000644151	0.0363409
CAMKMT	0.119237	0.553275	1.04772e-05	2.26871e-06	1.04772e-05	0.0117537	2.84217e-14	3.93523e-05	0.000137629	0.0170369
CPQ	1.42109e-14	6.05627e-05	0.0133297	1.29157e-09	0.097986	0.200501	1.68125e-08	8.31945e-08	1.79199e-11	3.84847e-06
CNP	0.000284136	NA	0.0727328	0.000621568	2.27374e-13	0.00254179	0.000371155	1.80179e-07	2.27374e-13	NA
DCP2	0.000284136	NA	0.561766	0.432835	NA	4.54747e-13	9.77707e-12	3.11502e-11	5.20671e-06	1.13687e-12
ARL14EP	NA	NA	NA	NA	0.258371	0.373506	0.000667766	4.09335e-05	0.0731402	NA
BPIFB3	5.76904e-10	NA	NA	3.8975e-09	9.9476e-14	1.98227e-06	7.23091e-10	0.166041	0.00873949	4.08107e-10
CCNL1	NA	NA	NA	0.0194481	0.021624	1	0.431945	1.10595e-06	0.611692	NA
BRIX1	1.27329e-10	NA	0.00239223	1.54651e-05	0.0130258	1.54651e-05	0.00206057	2.53547e-07	0.0120159	NA
ADAP2	0.235941	NA	NA	5.82077e-10	0.0230237	0.000323666	1.00044e-10	1.03056e-06	0.00226578	2.10896e-06
CYTH3	NA	NA	NA	NA	NA	NA	NA	0.259452	0.0802028	NA
CALCOCO2	0.168299	0.995392	NA	0.96775	0.000584529	2.93775e-05	1.13687e-13	1.13687e-12	2.98327e-07	9.06552e-08
ART4	0.00188957	0.011235	5.76949e-09	0.955439	9.62196e-08	0.109497	2.83846e-06	8.08581e-05	0.0039072	1.42109e-12
ANTXR1	0.549682	NA	0.11889	0.00485235	NA	0.0535519	0.00569256	0.0348308	4.33176e-05	NA
ABCD4	1.13854e-07	0.168207	1.58806e-12	1.14149e-11	1.3757e-08	0.0256185	3.21092e-08	0.435333	2.76005e-07	5.04222e-10
ALS2CR11	2.06536e-06	4.52311e-07	0.00069009	0.000457313	5.65856e-08	5.22519e-08	3.55271e-15	1.31806e-12	1.50061e-08	0.0368201
CCDC94	0.825013	NA	0.0224969	0.947598	5.97184e-05	0.000507212	2.58819e-09	0.00135036	0.136984	NA
DKK3	2.84217e-13	NA	NA	0.43312	0.426551	0.866861	0.000861468	1.08912e-09	0.0841903	9.9696e-09
CYB5R2	0.000469678	1.7053e-13	1.2637e-05	NA	1.35003e-10	3.97904e-12	1.42109e-12	0.946539	0.0862795	5.68434e-14
CCL14	5.86291e-07	2.30024e-06	1.02319e-07	2.10896e-06	0.0714102	0.102958	0.215978	6.45181e-07	1.58161e-09	5.64495e-05
DDIT4L	NA	NA	NA	0.0223832	0.0158788	0.186569	4.67553e-08	0.000130654	4.36557e-11	NA
CASP4	NA	NA	NA	0.015953	0.00210876	0.582827	2.73247e-08	0.664681	4.14948e-06	0.0101567
AEN	1.08509e-06	6.86461e-09	NA	6.75016e-11	0.00304354	3.22797e-09	2.84217e-13	1.56093e-06	0.000888407	0.00167625
ARHGAP18	1.32339e-11	4.10396e-08	0.190928	3.93411e-07	5.62252e-10	0.0324235	4.82301e-08	4.21901e-07	5.14869e-06	3.79785e-12
CCDC62	6.00409e-13	2.46084e-05	0.898038	7.22977e-12	1.14149e-11	0.000229211	0.00150353	0.0459877	1.1724e-13	1.43547e-05
CAMTA1	0.492167	NA	0.251058	NA	0.00203634	0.00590517	4.74667e-09	1.34132e-08	0.545005	NA
DHRS7	3.091e-10	NA	8.15419e-11	0.0170369	0.00086202	0.00566055	0.0228877	2.84217e-14	0.00397091	NA
BLZF1	8.29149e-05	0.912362	0.0936932	0.002021	0.000258114	2.21056e-07	0.26695	2.84217e-14	1.72902e-06	9.166e-10
CMYA5	3.82504e-10	1.21035e-09	3.60788e-10	0.0334646	4.2983e-10	7.43626e-07	3.60788e-10	5.74557e-10	5.74557e-10	0.0241986
C14orf169	0.448582	0.137319	NA	6.89516e-05	1.18143e-08	1.46505e-05	0.00300382	0.0348046	0.0545079	1.81899e-12
C16orf87	NA	NA	0.212143	0.670525	NA	0.196388	0.0138702	3.8147e-05	0.00128937	NA
C1orf105	0.000269145	0.016575	2.97245e-05	0.46157	0.843677	0.00122944	9.77707e-12	0.0203496	NA	0.121542
CBLL1	NA	NA	NA	0.002987	1.82446e-05	0.0449072	2.3488e-06	NA	2.04891e-07	NA
ATG7	2.3455e-11	NA	NA	2.59417e-05	0.101065	0.00168159	9.57368e-10	0.547237	2.03855e-11	2.4869e-14
ATP5S	6.41912e-07	NA	0.0843339	0.0567872	1.98952e-13	3.60475e-09	0.00125257	3.97904e-13	1.4525e-06	1.56093e-06
CNIH	NA	NA	NA	NA	NA	NA	NA	NA	NA	NA
FCF1	NA	0.781906	NA	0.00106812	0.0638275	0.190094	NA	1	NA	NA
FCRL5	0.0026081	0.00113298	0.000169632	0.000456734	0.434603	0.903455	0.191182	4.05157e-09	5.04322e-08	4.56224e-08
CXCR2	0.00210876	NA	NA	1.97701e-10	5.53183e-06	1.91631e-09	6.25278e-12	0.283413	0.0188416	NA
CRNN	7.95257e-06	NA	NA	0.132468	0.00141455	0.72521	0.0198428	0.0641322	1.17543e-05	5.62668e-10
ANAPC2	1.70053e-05	NA	0.0673315	NA	0.877752	0.00286765	0.0397072	0.000288144	0.90816	0.738848
ANKRD45	1.27329e-11	8.69366e-07	NA	0.00352048	0.00424445	0.952306	6.00267e-11	0.952306	5.45697e-12	0.589976
av27s1	0.964345	NA	NA	4.31265e-05	2.0935e-05	NA	NA	NA	0.358128	0.0862795
C10orf11	0.00934764	NA	0.000233964	0.585392	2.19874e-05	0.0704403	0.0399607	1.11686e-09	7.27596e-12	1.89866e-06
DBX1	NA	NA	0.000434451	0.000898782	2.43048e-05	0.000529956	2.28661e-07	0.0919113	7.27596e-11	NA
ANKRD62	NA	NA	NA	3.64712e-06	0.000782509	0.764738	1.16415e-10	1.10595e-09	NA	0.00505499
C17orf74	1.50565e-07	4.33147e-11	5.68434e-14	0.000139463	0.0637581	0.0202648	1.15676e-10	NA	0.00252349	1.86864e-08
CBY3	0.684959	NA	2.04891e-08	8.29522e-05	0.00930309	2.04891e-08	1.79273e-05	4.61398e-05	0.386161	4.81959e-08
ANGPTL2	0.00248541	NA	NA	0.0126107	0.117209	0.0459091	0.895725	0.830654	0.00224236	0.000137672
CSTF3	NA	NA	NA	1.90735e-06	0.000707626	NA	NA	0.0192337	0.123093	NA
ACP6	0.018989	0.00135115	1.82458e-08	0.00967935	0.150338	0.839355	0.0426431	0.984597	1.12054e-09	0.179659
ALOXE3	1.1192e-07	4.9738e-14	1.19776e-10	5.14554e-10	0.400846	0.803367	0.166041	0.128566	0.00144321	0.00264003
CREBBP	0.000492716	5.33276e-06	6.83305e-05	0.394568	0.00146418	2.89981e-09	2.45756e-06	0.805753	0.0196361	1.82638e-10
C16orf59	0.000101798	0.24476	0.000468835	0.0408698	0.633185	2.50036e-09	0.47856	0.539285	3.9293e-11	2.43582e-08
BC040860	4.07454e-10	NA	7.33999e-08	3.79672e-05	0.15352	7.33999e-08	5.82077e-11	0.287218	0.412833	2.15615e-05
ASB2	2.58115e-09	0.0948376	0.000147221	0.0248417	1.28864e-09	4.71402e-07	5.68434e-14	1.71032e-08	0.896695	0.350786
CYP17A1	3.53708e-11	NA	0.000497964	9.9476e-14	0.106663	0.0161321	0.00203634	5.15726e-05	7.10543e-15	1.20082e-12
DNAJC5B	0.0194701	NA	0.229581	0.00193428	0.00271978	4.88853e-12	0.351007	0.114442	2.35332e-11	NA
AMOTL2	0.345949	0.108943	0.123425	1.62713e-06	4.196e-08	0.0215219	0.898926	0.000476965	0.00064264	0.466798
CTNNA1	0.000974692	NA	NA	NA	0.000124067	1.19284e-05	0.247025	0.00693829	0.0655152	0.346685
CBWD3	NA	NA	NA	NA	NA	NA	NA	0.0593549	0.094073	0.0253507
ENTPD6	0.106663	7.10543e-15	7.10543e-15	3.62888e-10	7.10543e-15	4.06249e-07	0.0186608	2.13163e-14	9.48504e-07	0.000456777
CPE	9.25411e-10	NA	8.70841e-09	NA	NA	NA	NA	0.0504177	0.0756506	NA
ACSM4	NA	NA	NA	1.13687e-13	0.382184	4.57222e-05	4.57222e-05	3.63798e-11	0.407187	0.0251649
ARL6	NA	NA	NA	NA	0.0110453	NA	NA	0.00218153	NA	NA
COQ3	6.89631e-06	0.159104	0.447088	1.42751e-07	1.93937e-06	4.10396e-08	0.00269286	1.82057e-06	0.508446	1.77636e-14
ARL5A	NA	NA	NA	0.252228	NA	NA	0.32251	NA	0.899933	NA
ATP5G2	0.277551	NA	0.000182808	0.706477	0.000204443	0.047626	0.653854	0.919095	0.00459463	NA
ANO4	0.0756845	0.581124	0.0020585	0.000786172	5.64495e-05	0.0142604	4.87489e-10	0.024712	0.898007	NA
CCRL2	2.11412e-08	NA	NA	0.0179493	0.0368201	1.32185e-06	7.75104e-08	2.27374e-12	1.06237e-09	1.06581e-14
ACTL7A	3.49674e-08	NA	0.320421	0.000325916	0.00318763	0.00330775	0.26695	0.511836	9.19112e-05	7.47359e-05
DAZ1	NA	NA	NA	0.00821505	0.00102092	0.546018	0.000338733	0.952893	0.678951	1.49012e-08
CNTRL	0.000441756	0.588795	1.42521e-09	9.34705e-10	0.011752	0.000104191	1.23058e-08	1.0886e-06	0.00467798	7.79049e-10
CCNB1	6.35233e-08	0.240521	NA	0.00786118	2.84217e-14	0.180734	1.63118e-09	0.51567	7.10543e-13	0.00167625
COMMD10	0.9505	NA	0.983491	5.04766e-07	0.138457	0.0385777	8.47359e-05	0.0023611	0.614255	0.00934764
DMTF1	0.00585752	0.268217	NA	9.7225e-10	0.000115706	0.410904	1.74105e-08	5.31624e-06	2.72848e-12	NA
ASTL	6.25278e-12	NA	4.59655e-07	0.82175	0.0139244	0.70721	0.681575	NA	0.375596	1.13687e-12
ADAMTS5	1.05507e-07	0.105338	0.635905	0.299121	0.37389	0.00498248	0.00168159	0.580624	0.012341	0.0569639
CLDN1	NA	NA	0.088371	2.96131e-08	1.65383e-07	4.01842e-05	1.99482e-06	1.45519e-11	9.84521e-06	NA
DAAM2	0.00166056	0.0555995	1.07775e-10	0.0875329	1.42109e-13	0.000325916	2.58582e-07	2.38085e-05	0.000283513	0.0528805
CCDC79	8.15419e-11	6.44519e-10	1.42109e-14	NA	0.109392	0.733275	0.00106282	7.25578e-10	4.48736e-10	0.000118474
BICD2	0.391589	0.00281689	1.03764e-08	0.0152328	7.19069e-12	0.580729	2.47184e-10	9.60967e-06	0.000267921	NA
CDC34	0.000965118	NA	0.195633	0.859573	NA	NA	NA	NA	7.62939e-06	NA
CYP2C19	NA	NA	NA	1.89505e-05	0.0331346	0.00384374	0.00384374	NA	2.29925e-06	1.45519e-11
ANKRD20A5P	NA	NA	NA	NA	NA	0.029064	3.72529e-09	NA	NA	0.00197811
DLX5	NA	NA	NA	NA	NA	0.106438	0.00441234	1.7276e-07	0.585975	NA
CLUL1	7.77392e-09	NA	0.00318763	NA	0.0012027	4.48736e-10	0.00226955	0.280897	0.000512526	0.223874
FBXW7	NA	NA	NA	0.656587	0.518291	0.0494679	0.121623	0.00347071	4.54537e-06	NA
ADIRF	1.06096e-05	NA	NA	NA	0.839393	0.583757	0.80783	0.427955	0.000123337	NA
C10orf55	0.501889	0.122789	1.36012e-06	0.45317	0.000112468	5.77835e-07	0.00347524	9.62196e-08	0.0244087	1.15289e-07
C1orf131	0.00086202	4.66897e-06	4.15639e-05	0.0180914	0.257917	2.96201e-06	5.29354e-11	2.24889e-05	2.58582e-07	1.49848e-05
ARFGEF1	0.129746	NA	NA	9.87317e-08	0.000209532	0.565951	8.9733e-10	7.00823e-10	0.0539311	NA
AGPAT5	NA	NA	0.27668	0.819906	7.40329e-09	6.12235e-08	2.19874e-05	0.000205397	7.40329e-09	NA
AMY2B	2.70006e-13	NA	NA	1.56319e-12	6.11067e-13	0.797295	7.02355e-08	0.96238	3.5044e-10	NA
ABHD17C	NA	0.390991	0.625732	0.000854492	NA	NA	NA	NA	NA	NA
CD7	0.267489	NA	NA	NA	1.89505e-05	2.90216e-07	0.038457	NA	0.255139	4.80359e-08
CDA	2.96131e-08	NA	NA	1.29115e-06	0.0121309	0.0110642	NA	0.153418	0.0348958	NA
CRHR2	6.18172e-10	0.282328	0.529801	NA	2.88787e-09	NA	NA	6.1329e-06	4.35934e-07	4.48344e-09
BAI3	0.00181176	0.0841903	NA	0.0884096	1.13687e-13	6.47049e-10	4.94367e-10	0.630582	9.9696e-09	1.2637e-05
ATP6V0A4	7.01147e-05	1.42109e-14	0.0139042	4.08107e-10	0.0112344	2.13163e-14	3.76552e-05	3.17613e-12	3.53708e-11	1.42109e-14
CAMK2B	1.27329e-11	0.170088	0.000479453	0.5537	0.00899504	0.0101974	0.00151762	0.354092	0.5537	NA
ARL14	0.143428	NA	0.0801322	0.0236719	7.78755e-12	3.75655e-08	1.95669e-07	0.00242263	5.6599e-10	0.0319589
CCDC47	NA	NA	NA	0.130661	0.00412304	4.33176e-05	0.0249416	0.00858428	0.0884041	NA
ACTN2	0.00548445	NA	NA	0.00829845	1.00117e-08	3.06244e-05	0.00696787	4.7381e-07	0.00110355	0.416094
CAPN12	0.0342051	1.77636e-13	9.9476e-14	2.42103e-07	NA	NA	NA	1.79767e-12	0.389475	0.045367
ADAMTS14	0.000632547	6.95667e-09	0.000100132	0.0194864	0.00228509	9.38602e-06	2.16225e-05	7.57892e-08	7.79049e-10	0.678075
CNKSR1	0.105338	0.230978	0.805328	0.0669052	0.657183	0.0731874	0.00015259	0.0530895	8.84062e-09	5.14869e-06
CXCL17	1.01863e-09	NA	NA	0.0438789	1.5556e-08	0.0362768	1.99361e-09	7.79983e-09	0.00226854	0.0205759
ADAM10	NA	0.118621	0.0144068	3.84262e-11	0.00769388	2.13637e-05	2.27374e-13	0.0462445	4.3201e-12	NA
BRD9	0.163301	0.0410184	0.0597361	NA	0.010864	2.44984e-05	0.0359803	6.00448e-09	0.354603	NA
CTBP2	8.03215e-09	0.591317	0.0884096	0.21664	0.0259408	0.00232538	0.388347	2.10889e-11	0.192351	1.13687e-13
BMPR1B	5.31624e-06	NA	0.748553	0.000148646	0.0122225	0.0778969	0.0255947	3.91083e-11	4.38071e-07	5.82077e-10
ACOT8	5.37976e-06	NA	NA	0.0460599	3.97904e-13	3.81681e-05	1.42109e-13	3.14551e-06	0.000712557	1.05871e-10
DHX30	NA	NA	0.000170298	0.571704	0.226508	0.0565834	0.847156	5.45697e-12	2.84317e-05	0.00010101
C16orf89	9.39811e-09	NA	NA	0.107934	3.35745e-05	7.19743e-05	0.0682823	5.84081e-06	9.03649e-10	8.03131e-10
C14orf39	0.364191	3.63239e-07	2.90698e-09	0.192509	3.67592e-09	0.192509	0.320083	1.26396e-09	0.000100132	3.75679e-05
COPS5	NA	NA	NA	NA	NA	NA	NA	NA	0.322266	NA
FBXO3	0.83204	NA	NA	0.27813	0.203179	0.789126	NA	1.39698e-09	6.37956e-08	NA
CCDC117	NA	NA	1.27329e-11	NA	0.00637837	1.0816e-05	4.51533e-06	2.79215e-10	2.30102e-10	9.09495e-13
CBWD6	NA	NA	NA	9.68148e-06	0.777263	6.12235e-08	0.0798085	0.252714	0.282901	3.63798e-12
ANKRD20A8P	NA	NA	NA	1.59957e-05	1.01863e-10	0.249111	7.27596e-12	4.65661e-09	0.00215903	1.01863e-10
ATG16L1	NA	NA	NA	3.18323e-11	0.218218	4.11092e-10	1.95541e-11	4.86125e-10	0.005323	0.302718
ASIP	2.74388e-05	0.187036	5.72504e-08	1.64441e-06	NA	4.86125e-10	0.804548	4.10691e-08	3.46517e-10	4.54747e-12
DNAJB3	NA	NA	NA	0.0111972	3.11502e-11	1.83777e-08	0.299515	0.0248336	NA	1.26862e-06
DDX4	0.203587	4.56477e-08	0.286622	4.96362e-08	0.000203696	0.000168922	3.777e-07	0.00144321	8.08399e-10	NA
CCL15	NA	NA	NA	NA	0.382645	1.43009e-05	0.571704	0.931152	5.37116e-06	5.45697e-12
CTSD	0.00352048	NA	0.000538157	NA	NA	0.0146776	4.09882e-05	NA	0.000891217	0.0584029
CARNS1	0.000231325	NA	5.09543e-07	0.588184	3.97904e-13	4.12417e-06	5.03629e-06	1.51468e-07	3.0461e-08	1.01358e-09
ACVRL1	0.00159583	NA	6.44866e-08	0.0012529	0.0180914	9.8617e-06	2.72294e-10	0.000341289	0.341458	NA
ADRA1D	1.55625e-05	NA	NA	2.91038e-11	NA	3.01225e-09	4.55175e-06	NA	0.0527449	NA
CWC25	1.06868e-07	NA	NA	3.33532e-05	0.440211	3.37828e-06	0.155961	3.16378e-06	1.42109e-14	NA
C12orf60	2.03963e-07	0.000479453	0.562668	0.962896	0.0584029	0.00487072	7.88019e-07	0.157751	1.0367e-07	0.13868
FCGBP	NA	NA	NA	0.806445	1.99775e-05	NA	NA	6.99093e-06	0.468913	0.0203496
AP2B1	NA	5.21541e-08	5.67734e-06	0.0628139	7.45058e-09	NA	NA	NA	2.28733e-06	NA
DHRS11	0.719662	NA	0.326788	0.000402855	0.000113452	0.0336073	4.54747e-13	0.0131729	4.59227e-08	NA
DDX11L11	NA	NA	NA	0.611221	0.00665283	0.0232239	0.120209	0.0638275	0.711899	0.0638275
ACCS	7.97197e-07	8.58053e-09	0.227948	1.80432e-09	0.0012027	0.00318763	5.42807e-08	0.773105	6.40774e-07	1.40556e-06
CAAP1	NA	0.552158	NA	0.213552	4.54747e-12	2.03272e-10	0.503452	2.05637e-08	1.50067e-11	0.115845
AGXT	2.87628e-11	3.54117e-05	7.28181e-05	0.000136164	0.00118594	3.85797e-06	0.741897	1.59162e-12	1.92131e-11	5.68434e-13
AJUBA	NA	NA	NA	NA	2.53547e-07	0.501375	0.910046	0.157751	0.704688	NA
A2M	0.000280995	0.287379	0.000447495	9.88885e-06	1.2382e-08	0.00132545	0.000123821	0.406792	0.000194579	6.19162e-08
DERL1	NA	NA	NA	NA	0.536151	0.733209	NA	1.99676e-06	NA	NA
COL4A6	0.0639316	0.81297	4.04405e-11	0.0530895	0.0596727	0.0782029	0.000219225	0.00912962	0.00309861	0.00110871
ADK	0.0638201	NA	0.970396	0.000128062	9.09495e-13	0.00221489	6.73299e-09	0.00102913	4.74361e-07	NA
ADCK3	0.000468835	0.391877	0.0165297	4.26326e-14	1.42109e-14	2.01338e-09	0.368944	NA	0.0242432	0.0387627
C10orf120	0.192176	0.359255	6.28688e-10	0.0519756	3.11502e-11	0.000137555	2.00089e-11	1.64e-08	NA	0.411966
DIO3AS	0.0840655	NA	NA	NA	0.0549216	9.90257e-05	3.85568e-07	3.85568e-07	0.000152871	0.730342
CNTD1	0.0367468	NA	NA	0.686401	3.93523e-05	0.0150853	0.741189	2.78285e-09	1.42109e-14	0.733275
CSNK2A1	NA	NA	3.62396e-05	NA	NA	0.113987	2.67029e-05	3.62396e-05	0.0171814	NA
APOL3	NA	2.72848e-12	8.22183e-10	0.179687	0.0137253	0.00138841	0.11764	0.354603	0.496223	9.09495e-13
C1orf172	0.00881438	0.00334099	NA	0.122789	4.31265e-05	0.0301305	2.36812e-05	0.00473368	9.62196e-08	3.12639e-12
CSF3	0.179053	2.88492e-09	NA	0.315387	0.000335884	0.0552492	6.66493e-05	0.000104434	1.05373e-11	9.27163e-09
CLDN6	0.0206751	NA	NA	9.09495e-13	7.32494e-06	1.57875e-05	4.52746e-09	5.21868e-09	3.91083e-11	NA
DNASE1L3	3.67358e-08	4.12417e-06	5.09543e-07	4.84333e-08	0.0322213	3.17452e-07	0.0993161	6.41912e-07	4.84333e-08	2.93714e-06
C9orf66	NA	0.582225	0.000590742	9.45032e-05	1.10567e-05	NA	NA	NA	0.408243	2.98023e-08
DDX11L1	NA	NA	NA	0.0917325	0.00468493	0.000176907	1.19209e-05	0.726184	0.0586901	0.00012064
ABHD1	6.00409e-13	1.09068e-12	7.15109e-05	0.000747929	2.99664e-06	0.0127105	3.03539e-05	0.0471136	1.2675e-10	3.93411e-07
AMER2	0.0699709	NA	NA	0.0017301	NA	0.954866	5.09614e-06	5.26197e-08	0.394466	5.82077e-10
CD1A	1.29855e-05	NA	NA	0.0630174	0.377727	NA	NA	NA	NA	1.45519e-11
CACUL1	0.0105619	NA	0.323383	1.10318e-07	NA	0.0827461	0.731629	1.01863e-09	0.79993	0.000268902
AV2S1A1	NA	NA	NA	0.334075	0.451014	NA	NA	4.16082e-05	0.00740791	9.83709e-09
CCDC150	0.153243	0.299121	0.002173	0.00144807	5.14869e-06	8.88178e-14	2.70717e-12	4.51784e-10	2.15658e-09	7.80576e-07
C1orf106	3.52059e-06	0.758298	0.0222169	NA	1.41729e-07	0.201808	0.989774	0.000168143	0.201808	0.867654
ACTRT1	0.732882	0.0872079	0.000334546	0.021624	8.19191e-05	4.59654e-06	0.00608486	NA	4.65661e-09	NA
ARL8A	NA	NA	NA	NA	NA	NA	NA	NA	NA	NA
CTSW	6.80735e-11	0.347797	0.322872	0.000139139	2.69438e-11	5.58976e-05	5.58976e-05	0.219517	0.435333	7.10543e-15
CD2	0.327763	0.116635	0.00941395	9.10663e-05	3.59712e-06	0.00781775	0.194347	3.0898e-11	5.26867e-12	6.75016e-14
CRISPLD1	5.5843e-10	NA	NA	0.242447	2.0375e-06	2.63907e-05	7.83984e-09	3.94884e-08	7.19802e-05	0.00227674
COPA	0.00224236	NA	NA	8.1612e-06	0.777263	NA	0.90665	2.30027e-06	1.63735e-07	3.16359e-08
FBXO6	0.695515	NA	0.00264003	0.118442	5.15726e-05	0.906974	0.395136	0.351217	0.000223441	6.25278e-13
AAED1	5.92263e-08	NA	0.0598791	0.00144613	0.907355	0.00119942	8.73115e-11	0.0015379	0.000763812	0.000475939
ARAP1	0.00207421	0.0153941	0.423003	1	7.368e-09	0.223866	8.27893e-10	3.54734e-08	5.17509e-07	0.134586
FFAR2	4.92124e-07	0.595467	0.153095	0.00276688	0.0611048	0.0044034	0.595467	6.45068e-08	0.0111229	0.275352
ATP6AP1L	0.00214243	9.62227e-05	0.00214243	0.206022	0.000632547	0.00200798	0.0171089	3.76554e-06	2.79542e-05	0.831817
C12orf44	0.899933	NA	NA	NA	NA	0.528168	NA	6.10352e-05	NA	NA
CNNM3	NA	NA	0.0375872	0.261845	0.548343	NA	NA	NA	0.00441234	0.312669
ARRB2	0.0724836	NA	9.03482e-05	0.000317786	0.000234932	0.00912954	5.68434e-14	3.26168e-10	1.13687e-13	NA
DDX11L2	NA	NA	NA	0.848011	0.131591	0.000407975	5.10365e-07	0.120655	0.564731	1.22935e-07
BTBD2	NA	NA	NA	NA	NA	NA	NA	NA	7.86781e-06	NA
EPHA3	0.00117778	NA	NA	1.7053e-13	5.68434e-14	2.75465e-07	2.10889e-11	0.00850877	0.000132208	2.45756e-06
EPHB6	0.0805951	0.00259684	0.969199	0.984597	4.53319e-06	NA	NA	0.0638208	8.27893e-10	0.00496796
DDIT4	0.410464	0.000195071	NA	NA	4.65661e-10	0.933871	0.000161883	2.08151e-07	0.963233	7.71601e-06
ASPHD2	0.00740309	NA	NA	0.0203496	0.0301271	NA	NA	0.00141474	0.00769388	NA
DNAJC5G	0.000367031	6.98511e-09	0.0261503	NA	0.51166	1.23563e-11	0.104421	0.436114	0.979734	1.35003e-13
DNAJC22	1.15289e-07	5.76949e-09	0.000155081	0.0222548	8.42988e-11	0.622642	1.35003e-10	0.840555	0.0184287	0.560722
BC049825	NA	NA	NA	NA	4.65661e-08	0.00347516	0.00145748	0.0128337	0.00761214	NA
CYTH4	7.52372e-06	NA	NA	0.0196015	0.0432801	0.11007	4.86125e-10	0.00602688	0.487725	0.17875
CCDC70	0.161787	3.63798e-12	1.37952e-08	0.994698	0.00352048	0.0215461	0.0408014	0.00010101	0.694827	NA
ARHGAP27	5.39483e-08	NA	0.15675	2.812e-07	8.26214e-07	0.0593813	0.00743926	0.000194436	0.000139676	NA
EPO	NA	NA	0.519437	0.00738264	3.36295e-05	0.75704	3.95494e-09	8.11279e-06	NA	NA
ANXA8L2	NA	NA	NA	8.43376e-05	1.25344e-06	NA	NA	2.50875e-07	NA	2.29751e-06
COMMD1	0.0032917	NA	NA	0.000129841	8.09882e-09	1.50112e-09	0.016575	4.95602e-05	2.30084e-08	NA
CLDN20	1.43814e-11	NA	0.638564	0.382184	0.487698	6.44815e-09	0.21664	7.16796e-11	0.281501	NA
ABRACL	NA	NA	NA	NA	5.24521e-06	NA	0.000287056	0.00963503	NA	NA
AWAT2	2.70006e-13	6.36773e-09	0.560335	6.36773e-09	0.0141841	7.07416e-11	0.0103421	0.567438	0.821678	NA
CDC37L1	0.0481231	NA	NA	0.60783	0.0653635	0.00038445	5.82995e-08	0.002737	0.225805	2.50742e-06
ARL8B	NA	NA	NA	NA	NA	NA	NA	NA	NA	NA
ASCC3	0.0203445	2.8836e-09	NA	0.32732	1.30807e-08	5.97174e-10	1.0164e-09	0.32732	0.000173984	9.38794e-08
CMPK1	3.49019e-11	NA	NA	3.25618e-07	1.13687e-13	3.75167e-12	NA	0.103953	1.00044e-11	0.615018
ANKS1B	0.854449	7.81597e-13	5.16081e-05	5.20103e-09	6.12488e-11	0.0209755	0.0279333	4.56595e-11	0.00695458	1.60737e-07
ATP5G3	NA	0.992295	NA	0.367257	0.00135648	0.0606236	1.02445e-07	0.356962	NA	NA
CDC123	3.25235e-09	NA	NA	6.01899e-06	0.437905	0.00227884	0.0198854	0.565961	0.320853	1.57634e-07
AV4S1	0.329021	NA	NA	0.000794074	0.000205397	0.0399607	0.00275161	0.343026	NA	0.110712
CCDC160	1.56093e-06	0.820237	0.000324951	0.118902	2.84217e-14	0.501734	5.03629e-06	2.56932e-11	0.0313198	2.07862e-08
CA3	0.141295	NA	NA	0.00935589	0.00972594	0.213552	1.78945e-06	0.000585985	0.00221489	4.54747e-13
COL11A1	2.18137e-12	NA	1.47082e-12	7.68125e-09	0.61471	5.12084e-06	1.23563e-11	0.013492	1.96465e-11	7.37456e-05
CXCL1	6.14818e-10	NA	2.91257e-07	0.714546	2.54659e-10	0.766699	0.000997389	2.54659e-11	1.81099e-08	NA
DCPS	5.13357e-07	NA	0.415637	1.56319e-12	1.98952e-13	0.765088	1.98952e-13	1.60737e-07	0.253479	NA
FGF17	NA	NA	NA	0.156403	0.798252	0.0798759	0.000789642	7.24792e-05	0.984322	NA
CCDC96	0.11185	NA	0.000205904	0.0101974	0.0394467	NA	NA	0.704688	0.0288499	0.017831
CCDC172	0.222522	2.13163e-14	9.32816e-06	0.695515	0.673089	2.18137e-12	0.000133131	2.73877e-06	0.000268286	0.00873949
DDX31	0.000283825	9.39688e-07	0.00629745	1.38856e-06	0.457299	0.900134	0.00496796	2.04008e-06	0.608914	0.900134
CYB5R3	3.45383e-06	0.00290784	NA	0.000273291	0.151851	1.25738e-09	7.90806e-10	5.00222e-11	0.0152607	4.54747e-13
CXXC1	NA	NA	1.45519e-09	0.100185	5.82077e-11	5.82077e-11	0.00380318	0.67987	0.668035	NA
CCL16	0.09414	4.06161e-06	8.87085e-08	0.0463934	0.00407423	0.0205848	0.196474	0.157753	0.334232	4.31901e-08
DLGAP3	3.23524e-10	0.879597	0.467767	NA	0.385593	0.0157216	1.27045e-11	0.922428	4.03056e-08	NA
ARHGAP11A	0.369316	0.00110314	9.34705e-10	0.00182077	2.46746e-06	0.111207	7.79049e-10	0.310776	2.54824e-08	0.00648441
ANKRD46	0.229707	NA	NA	0.0326232	0.0121093	0.0157446	0.00443573	0.000808984	NA	NA
ARPC1A	0.368277	NA	NA	0.261099	NA	NA	0.20245	0.0106888	0.000104904	NA
ART5	7.1355e-10	0.921598	NA	5.3011e-10	0.461842	0.0149985	0.336663	0.000161412	1.63058e-06	1
BC061642	0.64339	NA	NA	0.211178	0.0276742	NA	NA	NA	NA	0.601046
DGKA	NA	0.389993	0.0530827	0.0866527	0.0185268	0.0466106	5.84441e-09	0.00726407	0.000205904	NA
BRCA1	0.969199	0.170448	0.0298566	0.0680811	2.16346e-09	0.000317395	7.79049e-10	7.79049e-10	5.21277e-09	1.16283e-08
DLX6	NA	NA	NA	NA	NA	9.15527e-05	NA	0.000152588	0.00167847	NA
ARHGEF1	0.310448	0.00518705	0.000108851	NA	NA	1.55751e-11	2.27374e-13	3.25618e-07	1.78701e-08	4.21778e-11
DEF8	2.49999e-07	0.00678101	0.70721	2.28661e-07	0.0830911	0.015953	0.401198	1.13687e-13	0.225067	0.606899
CD80	0.0896401	4.79468e-06	6.83633e-06	0.0639596	0.803816	1.28771e-08	2.35332e-11	2.73172e-07	0.00628674	NA
DNAJB4	NA	NA	NA	0.20751	0.000315627	2.10479e-07	2.56114e-08	4.81959e-08	1.00117e-08	NA
CAPNS1	0.000364067	NA	NA	1.26529e-08	1.5301e-06	0.852178	1.38243e-10	0.111322	0.104837	NA
ALG13	0.97641	0.678737	NA	3.55271e-15	0.0816963	7.16897e-08	0.190928	1.26055e-08	0.00174503	0.929312
ARL15	NA	0.298844	NA	3.04952e-05	NA	NA	9.22009e-06	0.140283	0.640825	NA
ALKBH2	2.47184e-10	NA	NA	0.409906	4.78405e-05	0.965481	5.94595e-07	0.448003	7.19069e-12	NA
BTK	NA	NA	NA	1.62981e-09	NA	0.309202	3.1638e-05	0.0153094	1.16415e-10	NA
BTN3A1	NA	NA	NA	NA	8.54459e-07	NA	NA	9.09495e-11	NA	3.63798e-11
AGGF1	7.10543e-15	NA	3.19146e-09	2.73877e-06	0.0351141	0.0442415	0.00011515	1.42109e-14	7.37456e-05	0.000126869
CCNL2	NA	NA	0.491189	NA	6.09361e-11	0.294034	0.0129964	0.000780216	0.606899	0.257988
DAZ2	NA	NA	NA	5.14463e-06	1.30385e-07	0.839393	3.14787e-07	NA	0.114177	1.86265e-09
CYP2S1	1.98952e-13	7.10543e-14	0.937341	2.82095e-05	1.42109e-14	5.64977e-06	0.00101956	4.09891e-07	1.85141e-06	1.42109e-13
CBLN1	NA	NA	NA	NA	NA	NA	NA	NA	NA	NA
CACNA2D3	0.00368281	NA	NA	0.896695	0.0511935	5.80652e-08	4.80327e-12	0.00189431	0.00552489	NA
DDX11L9	NA	NA	NA	0.974622	4.19617e-05	9.05991e-06	0.0854092	0.00250483	0.50284	2.0504e-05
CD96	8.62073e-10	0.000105054	1.78286e-08	9.53099e-07	3.2324e-10	NA	NA	0.0134784	1.43018e-10	0.527663
CSDC2	0.594397	0.00758581	NA	NA	NA	NA	NA	5.52833e-06	0.00246869	NA
CLCN7	0.253094	NA	1.43763e-08	3.58555e-06	3.33106e-06	1.90962e-07	4.79468e-06	3.58739e-09	2.29137e-06	8.42094e-06
CRB3	0.950679	0.00681126	1.08541e-07	0.0203003	0.182859	0.148269	6.90002e-05	2.23132e-05	1.69393e-09	2.91038e-10
ABRA	9.93037e-10	2.16225e-05	NA	0.0270635	1.23058e-08	0.170448	2.74071e-09	0.0215914	9.34705e-10	0.00221271
ASL	0.0026155	0.000283624	0.0928787	0.00389378	0.63383	0.235693	0.000592757	0.315383	4.13893e-08	0.335977
ANGPTL3	8.84062e-09	NA	2.72034e-08	0.280966	0.0929262	0.190928	0.0765014	0.435333	5.87423e-05	NA
CXCR3	0.0747261	0.0462445	NA	0.628142	2.27374e-12	0.561766	4.35534e-09	0.0651811	0.0727328	NA
EPS8	2.50036e-09	NA	0.625724	0.114233	7.61702e-12	0.0408698	1.42109e-14	0.00274511	1.60737e-07	1.42109e-14
AP4E1	0.255137	0.00129257	0.0543562	0.000986715	0.0610659	0.119003	9.10663e-05	0.000273464	3.2324e-10	0.587412
DHRS9	1.80074e-06	0.0214002	NA	0.207128	3.03828e-11	0.0331446	0.000126147	0.845574	2.56932e-11	NA
ANTXR2	1.76103e-05	NA	6.86792e-05	0.321715	0.0896401	0.0363409	0.225067	0.000709234	0.141007	0.00118594
CISD2	NA	NA	NA	0.701881	NA	0.0897675	NA	2.28882e-05	0.000144958	NA
CPT1B	0.000519186	9.60967e-06	0.141326	NA	0.00683917	1.08509e-06	2.84217e-14	3.89377e-12	0.0884189	0.000163015
ADAM21P1	NA	NA	NA	NA	NA	NA	NA	NA	0.852741	0.436471
ARL9	NA	NA	NA	6.27188e-08	0.402604	0.709287	NA	0.0942921	0.000268902	9.31323e-09
CUL5	NA	NA	0.632172	NA	NA	NA	NA	NA	NA	NA
EPCAM	4.94367e-10	NA	0.501889	0.000386996	1.23623e-09	NA	NA	2.36812e-05	0.0329074	4.10898e-09
CPNE6	5.04766e-07	NA	0.000628877	3.63798e-12	0.00518731	3.63798e-12	3.63798e-12	0.20407	0.00117937	NA
ADA	3.76554e-06	0.0131054	0.543084	0.678075	4.43936e-05	7.84144e-06	9.34705e-10	0.213031	1.09871e-08	4.91907e-09
AV8S2	0.0266935	NA	NA	0.42028	0.00175441	NA	NA	0.000448979	0.000685358	NA
DBH-AS1	9.31323e-09	0.37773	0.00146811	0.130166	1.30385e-08	NA	NA	NA	0.0131986	0.0018534
DKK4	NA	0.0255947	0.130501	0.251726	3.52059e-06	0.151754	0.34131	0.918327	0.123943	NA
AFF2	0.094916	0.869648	0.000117321	2.69329e-08	0.0227162	5.48592e-08	7.79049e-10	0.170448	3.63239e-07	8.27893e-10
ABHD10	0.208462	3.54528e-05	NA	0.342718	7.10543e-15	0.0969284	0.000610925	3.19727e-05	3.55271e-14	NA
CD36	2.33389e-05	1.30524e-09	1.05507e-07	0.00380981	0.000586433	0.142004	5.60579e-09	0.000139139	3.38551e-06	9.55255e-05
DIO3OS	0.000902727	0.0138298	3.74042e-07	0.0226545	0.351605	0.143003	5.6274e-05	NA	NA	0.000340848
CALR	5.45697e-12	0.121399	0.000538157	0.00405211	1.81899e-12	0.0892089	2.23211e-06	1.81899e-11	0.467972	NA
CC2D1A	2.72327e-09	0.000702739	1.14282e-09	0.662934	5.97174e-10	0.0711698	0.14239	NA	9.69963e-07	5.3011e-10
BANP	0.0551331	NA	NA	0.00043834	5.82077e-09	0.279761	2.32831e-10	3.25963e-09	0.0279126	NA
ANXA8	0.1659	0.00129753	NA	2.69174e-08	3.063e-08	NA	NA	2.69756e-09	NA	0.0101974
C10orf62	4.18026e-08	0.000160373	8.10486e-07	0.00075443	1.12054e-09	1.92113e-09	7.79049e-10	0.0500407	0.000117321	0.170448
DMAP1	NA	NA	NA	0.0462626	6.3315e-05	0.0214288	0.248338	2.98023e-08	0.0020453	NA
APP	7.27596e-12	NA	0.000122224	0.00267453	1.01863e-10	9.01498e-07	0.372752	2.8045e-06	0.0013852	0.00329649
BMF	NA	0.0101951	NA	NA	1.09139e-11	7.53062e-10	7.53062e-10	0.000526081	0.614255	0.0346646
ACSM5	2.39158e-07	NA	NA	0.121542	9.12883e-05	0.00315448	3.56894e-06	0.000621568	0.0727328	8.09882e-09
COX19	0.360391	0.376522	NA	0.776785	NA	0.799773	NA	NA	NA	0.893212
CYP4F11	NA	NA	NA	0.847156	4.47471e-08	3.87518e-07	1.8059e-05	0.580807	0.00010101	1.81899e-12
DDX59	0.105338	3.38551e-06	NA	1.76854e-11	0.00187842	0.107526	4.9738e-14	7.73881e-06	0.0307928	9.10663e-05
CLDN7	0.96149	NA	NA	1.01158e-07	2.54659e-11	NA	NA	1.0059e-08	2.54659e-11	1.56249e-06
ARSD	0.81193	NA	NA	NA	0.5965	0.000187874	0.000139892	0.241066	NA	0.000376403
AAGAB	9.09495e-13	NA	0.0528504	0.347917	0.00249148	0.010864	0.368211	1.81899e-12	2.10896e-06	1
DDX11	NA	NA	NA	NA	1.10877e-07	3.78557e-07	1.52218e-05	0.099653	0.000172795	1.63732e-07
ARID3B	0.0692815	NA	NA	5.29354e-11	0.00130498	0.000130949	1.36708e-07	1.72902e-06	1.08287e-11	NA
CNPY1	2.08113e-05	NA	NA	0.00125363	1.80773e-07	NA	0.0065404	0.000931077	0.213552	2.60075e-08
ANKRD22	0.000298181	1.54354e-06	NA	0.00424445	0.785203	5.27853e-07	8.15276e-06	1.30443e-07	0.994698	NA
AOC4	0.100046	NA	NA	0.0360433	2.98138e-08	0.1629	2.98138e-08	4.56477e-08	0.00113956	1.42109e-14
CSNK2A2	NA	NA	0.00137424	NA	NA	0.707934	9.53674e-07	6.67572e-06	0.000161171	NA
FBXW8	NA	NA	NA	1.13687e-13	2.11742e-10	0.32384	2.44427e-12	6.25278e-12	0.200219	0.487698
CXorf58	1.13687e-13	NA	0.0112997	0.000160624	0.0125528	0.043317	5.92034e-07	0.00193428	0.043317	0.000675983
CXCL2	NA	NA	NA	NA	5.02951e-09	0.0125121	8.15276e-06	0.734557	2.82294e-07	3.76531e-10
CRX	NA	NA	NA	9.05464e-05	NA	0.875446	0.216887	0.27813	0.340299	NA
CYFIP2	NA	NA	NA	0.000427246	NA	NA	NA	NA	NA	NA
BAG1	1.63735e-07	0.0230281	3.28873e-09	9.46831e-07	4.08137e-05	0.000147312	0.0248556	9.68148e-06	8.94033e-08	3.25763e-07
CCNF	0.00719383	NA	NA	6.81931e-06	0.030367	2.50036e-09	0.000391466	5.91789e-08	3.93523e-05	1.08287e-11
CBX1	NA	NA	NA	NA	NA	NA	NA	NA	0.123047	NA
APLN	0.000919938	NA	NA	2.83122e-07	1.04308e-06	NA	NA	0.0262309	0.803988	NA
ANKRD35	0.0930214	0.595467	0.0131054	0.18281	1.33902e-05	0.00864731	3.74722e-08	8.26282e-09	0.0145948	0.00083768
ANK2	0.00406636	0.00499504	1.79011e-06	0.906727	0.0213811	0.158331	5.62668e-10	1.28453e-09	0.417478	0.283154
C11orf65	1.64758e-07	NA	1.88614e-08	2.22538e-06	8.72546e-12	0.854056	0.0360483	0.0613014	5.44588e-10	NA
CNGA2	0.6994	6.64579e-07	1.82458e-08	0.173478	0.000492443	5.52349e-09	0.000209846	0.671023	1.10045e-07	0.000929384
COX20	0.00899504	NA	NA	1.81899e-11	2.69756e-09	0.724554	6.00267e-11	NA	NA	1.00044e-10
FOXI3	NA	NA	NA	NA	NA	0.000162303	5.96046e-08	1.508e-05	0.000162303	0.672075
C12orf61	0.00128937	NA	NA	0.0482788	NA	0.0138702	0.670525	0.0182343	NA	NA
CCDC50	0.120488	9.70836e-08	0.00468841	0.441576	6.68842e-06	6.03094e-05	1.77484e-08	0.00406295	0.626102	0.00022983
C1orf140	2.32831e-10	NA	0.0187569	0.447318	0.00043834	2.48896e-07	0.376475	NA	NA	7.16932e-06
DBH	2.84217e-14	0.0766136	1.42109e-13	0.000132842	0.00871319	0.000778709	3.67358e-08	0.000374768	6.31022e-05	1.67673e-05
ASTN1	9.3576e-07	0.000519186	1.1678e-06	5.55698e-09	1.93309e-06	0.618428	6.54514e-06	0.138361	0.132571	2.70187e-07
FGF4	0.915314	NA	NA	0.00125264	NA	NA	NA	NA	5.52833e-06	4.09335e-05
CSDE1	3.09361e-06	2.57518e-07	8.49018e-05	0.225975	3.26669e-07	4.99497e-06	0.908714	0.0168523	0.0243186	NA
CTNNA2	NA	NA	7.62939e-05	NA	NA	NA	1.52588e-05	NA	NA	NA
DNHD1	0.428327	6.87413e-08	0.656147	5.3011e-10	2.62239e-05	9.58408e-10	5.3011e-10	0.101909	0.000634017	0.467567
CD1B	0.82635	NA	NA	0.00204584	NA	5.82077e-10	0.120744	NA	NA	NA
CBLN2	NA	NA	NA	0.00204344	NA	NA	NA	0.0477472	0.000646785	NA
CCDC88A	3.05533e-13	0.572421	0.378298	5.41434e-12	0.00188829	2.18137e-12	7.10543e-15	9.9428e-05	4.89642e-05	9.48504e-07
C1orf173	8.53408e-05	1.76719e-06	8.58058e-06	0.00089783	0.0773036	7.79049e-10	7.79049e-10	5.21277e-09	0.0180275	0.000395973
CPLX1	NA	NA	NA	NA	NA	0.735352	0.587891	NA	0.0012207	0.0170898
DDX1	1.05355e-05	0.476577	0.000794074	0.264514	3.63798e-12	4.02119e-06	0.787868	1.0483e-06	0.0561791	NA
CCL17	4.3201e-12	4.54747e-13	0.000533852	0.184011	2.27374e-13	5.44762e-08	0.000371155	0.00712196	1.74507e-05	NA
C16orf13	4.41995e-07	NA	0.253479	NA	1.42109e-13	0.16552	0.000696217	3.82226e-08	0.330834	NA
COMMD2	0.00514629	3.96932e-07	9.09495e-13	0.00249148	1.16764e-05	1.53705e-10	0.0801604	1.16764e-05	2.30024e-06	NA
DCTPP1	6.25278e-13	NA	NA	0.00150038	5.41833e-07	NA	NA	0.00133473	6.3481e-09	NA
FGF18	NA	NA	NA	NA	NA	2.67029e-05	NA	NA	2.67029e-05	NA
AMZ1	3.58555e-06	0.014909	1.55986e-06	0.0363409	0.00518705	0.144224	0.248265	1.13687e-13	0.0989971	1.55751e-11
CISD3	NA	NA	NA	0.00231899	0.0233116	0.0065404	0.0620021	4.32069e-07	4.74361e-07	4.74361e-07
C12orf45	0.000758806	NA	0.0291842	0.760512	0.0599431	0.0534957	4.90616e-08	0.213721	2.27374e-13	0.000481783
CALCRL	8.8005e-08	NA	1.15051e-10	0.495556	4.54747e-13	0.00290784	2.26373e-09	0.000323276	1.47757e-07	0.358538
AES	0.028018	NA	NA	NA	NA	NA	NA	NA	NA	0.000919938
CCT7	4.76579e-07	0.005577	0.00290809	1.2009e-08	1.2009e-08	8.848e-06	2.44852e-05	8.20273e-08	0.00136748	NA
ANO5	5.37976e-06	NA	NA	0.454539	0.522711	0.956858	6.98296e-06	4.78405e-05	2.07862e-08	NA
AQP8	0.00377814	4.79468e-06	NA	0.234157	0.00348399	0.00678101	3.25618e-07	0.175691	0.2119	1.74358e-07
FILIP1	0.000139676	0.372783	0.939253	0.00931281	2.40862e-06	1.20082e-12	0.75656	8.26214e-07	0.00181796	0.144971
C11orf96	NA	NA	NA	NA	NA	0.54459	NA	0.000693798	0.406033	9.53674e-07
CCBL2	0.000351142	NA	NA	7.10543e-15	3.75762e-06	0.000400795	0.00931281	1.34132e-08	0.320356	3.24968e-08
C12orf63	0.457299	0.00139717	0.930767	NA	0.000655351	4.64151e-09	8.51525e-07	3.45408e-05	1.60646e-09	1.12188e-05
DAGLA	0.000284136	0.000284136	2.27374e-13	0.00148187	0.00203757	7.17159e-09	6.35085e-05	0.628142	9.32688e-06	NA
APLNR	0.582827	NA	0.715829	NA	0.00250053	0.476689	2.93775e-05	0.812771	2.80238e-09	NA
EPOR	0.189493	3.521e-07	0.0125202	0.618301	0.0106804	1.49848e-05	4.26326e-14	NA	4.10575e-06	0.00442322
ACOT9	0.0350577	0.76187	0.0460599	1.23417e-05	9.1319e-11	1.56093e-06	0.00029518	0.409906	7.00823e-10	NA
ARL16	NA	0.756177	5.26852e-06	NA	0.0928787	NA	NA	0.614255	9.75452e-05	0.000283624
DDN	0.0287412	NA	3.89377e-12	2.56932e-11	0.282328	0.000147221	0.24942	0.026344	0.664994	0.000927968
ASPH	0.00449955	4.56477e-08	0.000126869	0.00168431	0.125975	0.272913	0.000698761	2.24389e-10	3.52922e-06	3.8975e-09
CRIM1	0.128844	0.805328	2.33389e-05	1.93937e-06	4.9738e-14	5.14869e-06	0.219517	0.782513	0.759881	NA
ANKRD49	9.43784e-05	1.20393e-07	NA	7.52372e-06	3.18323e-12	NA	NA	1.61863e-08	0.191282	NA
FBXO31	0.451734	NA	0.094499	0.1659	0.00533217	0.608506	1.81899e-12	NA	0.0135577	NA
ABCE1	NA	0.276855	NA	0.120544	0.389404	0.890381	0.276855	0.00115967	0.0946045	NA
DNAJB5	0.0699169	0.000308916	NA	0.00590849	4.55175e-06	0.140633	2.76486e-10	7.79983e-09	4.55175e-06	0.000233643
CPLX2	NA	NA	NA	NA	NA	NA	0.820312	NA	NA	NA
DDB2	1.92131e-11	NA	0.0303276	0.117188	0.88518	0.848819	7.95808e-13	1.13687e-13	0.551429	NA
DENND1B	0.272913	NA	0.97163	3.90799e-13	0.00931281	0.939253	0.0897352	2.73388e-08	0.665676	7.10543e-15
DIO3	NA	NA	NA	6.78403e-05	0.00725158	0.0136243	6.32572e-08	0.0243186	0.863436	2.57518e-07
AHNAK2	NA	NA	NA	NA	0.561933	0.0214288	0.785742	NA	0.696386	2.04146e-06
CYP26A1	0.959111	0.257145	NA	0.0265039	2.63209e-05	0.00786196	2.63209e-05	1.9757e-08	0.00038445	0.000363125
BBS12	1.23417e-05	1.63084e-10	0.00181895	5.97313e-05	6.1329e-06	0.786742	5.40012e-13	2.50111e-12	7.8586e-11	4.79105e-10
FGF5	0.00681126	0.000205385	NA	4.54747e-12	0.0152607	0.0394134	0.0152607	0.268833	4.00178e-11	NA
CSTL1	1.07975e-08	5.54195e-07	NA	0.226375	2.91038e-11	0.00816422	0.00312021	1.60593e-05	0.0598791	1.63642e-06
CCDC71L	NA	NA	NA	0.14386	NA	NA	NA	0.00515747	0.00268555	0.0335388
AGPAT6	NA	8.19564e-08	0.231694	0.106625	0.00385993	0.00171606	0.00171606	9.31323e-09	0.00621726	0.0304844
DNAJC12	0.0256663	NA	1.11283e-05	0.002101	6.40655e-06	0.00115433	1.42109e-14	0.0528805	0.26695	9.09495e-12
ACSF3	0.641538	0.42239	0.0511935	7.19069e-12	0.0138439	0.737236	0.00148101	NA	1.67685e-06	0.000452021
CTNS	5.43088e-05	NA	1.24738e-05	0.372783	1.16394e-06	0.30078	1.92311e-08	0.00793742	7.81597e-13	0.268443
CAB39L	0.178842	6.60133e-07	0.0209799	0.0556652	2.60188e-08	1.87021e-07	3.20142e-09	1.74623e-10	1.77393e-05	NA
ATAD2	0.00139445	1.59894e-09	0.0189821	0.142004	7.10543e-15	0.459018	1.8148e-10	0.406724	6.00409e-13	8.98837e-13
DCAF16	0.268672	NA	NA	0.877918	NA	0.0140057	6.4075e-07	7.28965e-05	0.000236318	NA
COPS6	NA	NA	0.0758514	NA	NA	NA	NA	NA	0.0531693	NA
APOA5	0.00382954	0.000213451	0.421705	0.000311178	5.06887e-10	0.002101	0.00546691	0.000696217	0.40962	0.00878696
CNNM4	0.00197246	NA	1.23417e-05	0.141326	1.39628e-05	7.59006e-08	0.0110215	3.89377e-12	0.00615118	0.0295801
ADAM21	NA	NA	NA	0.536938	5.68434e-14	NA	NA	0.0195372	0.603222	1.14836e-08
CCDC140	1.41934e-06	7.99447e-06	NA	NA	0.597808	0.00145748	1.99117e-06	NA	0.80783	1.86265e-09
CCNB2	2.2269e-05	NA	0.364053	0.44643	5.68434e-14	1.18481e-05	8.41794e-10	2.6757e-05	0.638564	NA
BPGM	NA	NA	0.0374339	NA	1.00044e-11	0.161137	2.49999e-07	0.0374339	0.750653	0.304912
CXCL3	NA	0.44613	0.144803	0.0630174	0.765557	0.10706	0.176611	0.100519	3.45608e-08	0.00299192
CAMKV	0.00148574	NA	NA	0.0139244	3.0934e-06	1.55986e-06	0.207634	2.27374e-13	0.0125528	3.58739e-09
C1orf141	0.647952	0.00148574	0.220616	0.940145	3.75167e-12	1.68601e-06	5.68434e-13	0.000115162	0.00979867	0.0170592
CCDC71	9.93037e-10	3.89717e-09	0.000610483	2.54824e-08	1.74136e-05	0.000108405	1.60646e-09	0.643108	6.11213e-08	NA
DIXDC1	9.9428e-05	NA	1.5455e-10	0.00105199	0.000256362	1.00766e-09	1.00766e-09	3.53708e-11	0.272913	2.13163e-14
BRK1	NA	NA	NA	NA	NA	NA	NA	NA	NA	NA
AVEN	0.0559022	0.188502	6.53944e-06	0.00455699	3.40714e-08	1	1.05354e-07	5.15729e-09	3.54144e-07	0.44643
ADM2	0.0233361	NA	NA	0.742885	0.611968	0.000130654	0.00720582	0.731629	0.0472658	1.08048e-05
BPIFB4	0.00150038	NA	NA	0.00144321	3.62888e-10	0.00631208	2.34479e-13	0.179053	1.48076e-05	2.98138e-08
DERL2	NA	NA	0.0305176	NA	NA	NA	NA	0.000656128	NA	NA
CCDC11	0.223874	1.18167e-05	0.00769412	1.42109e-14	2.59388e-06	4.41995e-07	2.84217e-14	1.42109e-14	3.82226e-08	0.0012027
CNPY2	NA	NA	NA	NA	0.00613073	0.0630297	0.0204286	2.98023e-07	0.247238	NA
CASP5	4.22033e-07	5.41948e-05	0.0499444	0.0919113	0.000189048	0.000413162	1.91631e-09	0.656295	7.95808e-12	0.262944
DNAJC5	NA	NA	NA	NA	0.132727	NA	NA	0.311794	NA	NA
C12orf10	0.16552	0.386066	0.000151937	0.00606606	0.00382954	0.0377435	7.07416e-11	NA	0.0203692	1.16063e-07
CMPK2	0.0375872	0.00471025	0.000433448	0.000713176	NA	0.177624	4.65661e-10	0.00114433	2.00234e-08	4.65661e-10
DNASE1	1.88614e-08	3.60475e-09	NA	0.000309739	0.000927968	0.000452021	4.40959e-06	9.87317e-08	0.000473475	0.000189634
CLDN22	0.0164981	0.0445809	0.000189048	0.316049	1.33341e-06	0.606899	3.41061e-13	2.27374e-13	1.97701e-10	NA
ALKBH3	0.367318	NA	0.00118577	7.10543e-14	0.538252	0.0733057	7.36081e-06	0.0565996	0.222522	NA
ACTRT2	2.66453e-06	0.0397019	0.18722	0.000675983	2.27374e-13	0.000115162	0.128679	2.47143e-06	1.13198e-09	0.0352747
CBX2	1.23592e-10	NA	0.00245012	0.262407	0.127057	0.954028	0.285651	0.485121	0.0165297	NA
CSPP1	1.89938e-05	1.81873e-05	1.26396e-09	1.07309e-05	0.428612	0.00110314	9.93037e-10	8.88319e-05	2.54824e-08	5.44951e-06
COCH	0.000172431	NA	0.406057	0.00144991	1.39607e-10	0.131299	0.519437	0.000100382	4.10691e-08	NA
CWC27	7.30552e-10	NA	NA	0.0534957	0.000533852	0.45429	2.27374e-13	0.121542	0.000154257	4.54747e-13
COX4I1	0.875664	NA	NA	0.307509	1.13687e-13	0.000333939	4.33547e-06	0.630582	0.788489	NA
CD63	0.0817138	NA	0.03322	0.5448	1.81899e-12	0.187617	0.13868	6.74845e-10	0.0497606	NA
CRBN	NA	NA	NA	0.00759919	0.156895	9.17498e-09	0.463892	1.38243e-10	1.78567e-07	NA
COQ4	1.854e-06	NA	0.0244989	0.000678918	0.0134646	0.00313782	5.44154e-07	0.000329387	0.720964	0.475015
ADRA2A	NA	NA	0.334232	0.024897	0.0138298	0.0781152	0.28541	0.00957419	0.133758	0.0031918
DMTN	1.10595e-09	NA	NA	8.7145e-06	2.16824e-07	0.114782	5.26197e-08	7.33999e-08	0.715831	NA
CRISPLD2	2.05605e-09	0.00120067	0.207128	0.258542	4.71402e-07	1	0.618428	0.000473475	0.0784886	NA
ARSE	0.00266072	0.437447	0.000109196	NA	0.226959	0.110534	0.0253507	NA	NA	6.03199e-05
CA4	0.0781624	0.212448	6.53944e-06	0.000139463	9.60654e-12	4.31265e-05	0.0236719	0.000302348	4.94367e-10	5.68434e-14
CAPNS2	0.188062	0.00423211	0.0747261	0.0727328	0.000122524	0.405142	2.27374e-13	0.697602	0.00135036	NA
ANKRD23	1.42109e-14	0.0181295	2.44646e-05	0.123425	0.0021142	1.42109e-14	1.42109e-14	NA	9.23208e-11	1.48076e-05
BRMS1L	NA	NA	NA	NA	NA	0.104584	0.19281	0.000305176	0.0443115	NA
FGFR1OP	0.0735656	0.891753	9.09495e-13	4.32069e-07	0.0584917	7.9141e-08	1.12018e-08	1.33428e-07	4.74361e-07	3.4488e-09
AMER3	4.27525e-05	1.51468e-07	5.3482e-05	0.00222455	0.0350577	0.0539311	0.696773	2.84217e-14	0.0350577	6.54514e-06
ACY1	9.60654e-12	1.95669e-07	NA	2.44427e-12	0.0905809	6.99488e-06	1.87583e-12	0.0348753	0.114674	NA
CRY1	1.99775e-05	NA	4.54747e-13	0.000109012	7.17159e-09	1.30467e-09	0.787984	2.60725e-05	0.03747	NA
CPLX3	0.00613073	NA	NA	7.45058e-07	0.531663	0.0204286	0.0140065	0.00293294	0.00613073	0.00241077
CLDN8	1.34926e-07	NA	0.000254878	2.17759e-07	0.10747	8.09882e-09	7.5178e-06	2.27374e-13	0.266983	0.251644
ARPC1B	6.48826e-07	NA	NA	4.80359e-08	0.000604217	0.509007	0.404563	NA	6.6002e-06	NA
DHRS12	NA	NA	0.575736	0.437905	0.0136243	NA	NA	NA	0.852178	0.0319045
ATP6AP1	0.745419	0.356447	NA	NA	9.36888e-09	0.000113677	1.22498e-10	4.84333e-08	0.00368281	NA
ADAM11	2.84217e-14	4.79105e-10	NA	0.124233	1.17344e-07	4.20897e-10	7.59006e-08	0.0255835	1.41483e-10	NA
CCRN4L	5.69529e-05	0.00972594	1.50067e-11	5.98515e-06	0.0602262	3.74132e-06	0.000106734	0.701209	0.0217617	0.0011364
ANXA9	1.86864e-08	NA	NA	0.43312	0.208314	0.000106515	0.000118725	0.00181176	7.33562e-07	3.97904e-12
FGF19	0.00665414	NA	NA	0.294711	NA	0.00184288	3.20142e-09	3.79672e-05	3.72529e-08	NA
AK022898	7.9141e-08	0.000193812	NA	1.50067e-11	7.8286e-05	0.227762	8.33465e-05	NA	0.00799554	0.191282
ABCA12	0.000114702	0.00904072	2.37906e-08	0.000805161	5.3011e-10	0.0682823	5.3011e-10	1.62117e-09	0.832963	5.3011e-10
ARRDC1	0.236918	0.00155184	8.68341e-06	NA	0.0747261	1.59162e-11	3.11502e-11	NA	3.56894e-06	1.13187e-09
DKKL1	3.17452e-07	0.350786	NA	NA	0.173663	9.20673e-05	3.03828e-11	0.132571	0.000651541	1.23417e-05
CYP2C8	NA	NA	NA	0.00833823	0.0512329	0.306917	0.886029	0.000567902	0.125213	2.2398e-05
C16orf62	5.63082e-06	0.509092	0.0366144	NA	6.82006e-08	0.179184	4.82855e-10	0.0735329	1.55606e-06	0.0225317
C14orf177	0.0593945	0.28541	1.28057e-08	3.57395e-08	0.00614141	0.208687	1.468e-07	1.72266e-05	0.0031918	3.57395e-08
CYB5R4	4.9738e-13	0.00571053	2.3158e-05	7.10543e-15	1.42109e-14	4.41091e-05	1.22409e-08	1.60784e-08	0.0333158	NA
FBXO7	4.52311e-07	0.0816963	0.000877004	4.61604e-11	0.238847	0.0406863	1.32339e-11	0.0307928	0.322872	5.05862e-05
FOXJ1	0.257988	NA	0.92178	0.045875	2.87628e-11	1.87944e-05	0.000644151	1.20441e-07	2.35332e-11	NA
DCUN1D1	NA	NA	NA	NA	3.05176e-05	0.820892	NA	NA	0.0335388	NA
CCDC141	0.019975	0.00430343	0.0144769	0.3795	0.0327143	0.141354	4.82855e-10	0.0446353	0.00211504	0.323103
DCST1	4.8476e-07	0.000159755	2.4869e-14	NA	3.55271e-15	3.12639e-13	8.84062e-09	0.142004	0.00106661	3.78327e-08
ATF6	0.0799344	NA	1.01811e-06	6.17817e-12	0.0359031	0.368578	0.259326	0.00259915	0.0292318	1.9419e-08
CABYR	5.26867e-12	0.635905	NA	0.00667432	9.55255e-05	3.85386e-09	8.98837e-13	5.26867e-12	0.0459877	3.2324e-10
CUL7	0.000108405	0.00130653	9.34705e-10	1.92113e-09	9.34705e-10	0.220211	7.56292e-05	0.000678918	0.0158079	9.62227e-05
C11orf42	1.15019e-05	NA	0.144754	7.80576e-07	1.78286e-08	1.12202e-10	0.0138772	0.0071127	7.72751e-11	2.29306e-10
BRDT	0.706562	2.28942e-07	4.32831e-06	NA	2.58705e-06	0.000632547	0.0138324	2.84311e-06	0.678075	0.39561
C16orf97	0.944107	0.0164067	NA	NA	0.14335	0.422341	2.38419e-07	0.833373	NA	NA
BTBD3	NA	NA	5.82077e-11	0.0578694	NA	5.82077e-11	0.00781189	9.1838e-05	5.82077e-11	NA
C17orf75	6.34304e-09	NA	0.127551	0.115753	6.34304e-09	0.164705	4.62705e-10	0.000391229	5.90312e-07	6.03812e-06
AF035281	NA	NA	NA	NA	NA	NA	NA	0.00422096	NA	1.90735e-05
CDC37	0.075008	0.0928787	NA	0.0221579	0.00191739	0.158277	0.451174	NA	0.000526081	NA
CCL18	4.4148e-08	NA	1.45519e-10	8.33774e-07	4.95054e-07	0.00498432	1.22356e-07	7.50333e-12	0.000457517	NA
C19orf38	1.08541e-07	1.80831e-05	NA	3.1436e-05	4.54747e-13	3.57748e-07	4.54747e-13	7.68523e-11	0.399052	6.47467e-05
C16orf90	0.00427739	0.0970566	0.00160874	0.153669	6.35233e-08	NA	NA	1.23417e-05	2.88787e-09	NA
ACLY	7.85845e-06	NA	0.000199499	NA	0.0989971	0.00362842	0.00135849	0.434603	1.00044e-11	NA
DBX2	0.0016235	0.18425	1.77393e-05	NA	0.554462	2.87141e-05	0.0130247	0.0033846	NA	1.60698e-05
DNAJC24	2.16005e-09	0.130501	NA	4.1581e-06	2.39638e-07	2.63209e-05	9.7225e-10	0.00637837	1.81899e-12	NA
CD1C	0.0040432	0.509007	0.16567	3.36779e-05	0.121623	3.40988e-06	0.0413729	NA	NA	7.27596e-12
[truncated: 17,150 more rows]

## Sheet: SpeciesShiftsPerGene
	numsigp	numextremesd	numextremeIQR	whichsigp	whichextremesd	whichextremeIQR
CEP290	7	0	1	orcOrc1,turTru2,susScr3,cerSim1,loxAfr3,dasNov3,hg19	#N/A	loxAfr3
DNAH5	6	0	0	orcOrc1,turTru2,cerSim1,loxAfr3,dasNov3,hetGla2	#N/A	#N/A
DNAH6	8	0	0	odoRosDi,turTru2,susScr3,loxAfr3,triMan1,dasNov3,hetGla2,hg19	#N/A	#N/A
DNAH7	8	0	0	odoRosDi,orcOrc1,turTru2,susScr3,loxAfr3,triMan1,hetGla2,hg19	#N/A	#N/A
DNAH9	8	0	0	odoRosDi,orcOrc1,susScr3,cerSim1,loxAfr3,triMan1,dasNov3,hetGla2	#N/A	#N/A
Em:AC008101.5	4	0	0	orcOrc1,triMan1,dasNov3,hetGla2	#N/A	#N/A
PKHD1	9	0	1	odoRosDi,turTru2,susScr3,cerSim1,loxAfr3,triMan1,dasNov3,hetGla2,hg19	#N/A	triMan1
TTN	7	1	2	odoRosDi,orcOrc1,susScr3,cerSim1,loxAfr3,triMan1,dasNov3	susScr3	susScr3,triMan1
A1BG	6	0	0	odoRosDi,susScr3,triMan1,dasNov3,hetGla2,hg19	#N/A	#N/A
AADACL3	6	0	0	odoRosDi,turTru2,loxAfr3,triMan1,dasNov3,hetGla2	#N/A	#N/A
AAR2	7	0	1	odoRosDi,cerSim1,loxAfr3,triMan1,dasNov3,hetGla2,hg19	#N/A	triMan1
AB209621	5	0	0	odoRosDi,loxAfr3,triMan1,hetGla2,hg19	#N/A	#N/A
ABHD5	6	0	0	odoRosDi,cerSim1,loxAfr3,triMan1,dasNov3,hetGla2	#N/A	#N/A
ABCA3	8	0	1	odoRosDi,orcOrc1,susScr3,cerSim1,loxAfr3,triMan1,dasNov3,hetGla2	#N/A	dasNov3
ABLIM2	6	0	1	odoRosDi,susScr3,cerSim1,loxAfr3,triMan1,dasNov3	#N/A	dasNov3
ABCB4	7	0	1	odoRosDi,susScr3,cerSim1,loxAfr3,triMan1,hetGla2,hg19	#N/A	hetGla2
ACAA1	8	0	1	odoRosDi,orcOrc1,susScr3,cerSim1,loxAfr3,triMan1,dasNov3,hetGla2	#N/A	hetGla2
ACADS	8	0	0	odoRosDi,susScr3,cerSim1,loxAfr3,triMan1,dasNov3,hetGla2,hg19	#N/A	#N/A
ABCC1	7	1	2	odoRosDi,turTru2,susScr3,cerSim1,triMan1,dasNov3,hetGla2	susScr3	susScr3,cerSim1
ACBD5	6	0	0	turTru2,susScr3,cerSim1,triMan1,dasNov3,hetGla2	#N/A	#N/A
ABCD1	8	1	1	odoRosDi,orcOrc1,turTru2,susScr3,cerSim1,loxAfr3,dasNov3,hetGla2	turTru2	turTru2
ABCG4	2	0	0	susScr3,cerSim1	#N/A	#N/A
ABHD15	5	0	0	susScr3,cerSim1,loxAfr3,dasNov3,hetGla2	#N/A	#N/A
ADAT3	6	0	0	orcOrc1,turTru2,susScr3,loxAfr3,triMan1,hetGla2	#N/A	#N/A
ACER3	5	0	0	odoRosDi,susScr3,cerSim1,dasNov3,hetGla2	#N/A	#N/A
ACOT13	7	0	0	odoRosDi,susScr3,cerSim1,loxAfr3,triMan1,dasNov3,hetGla2	#N/A	#N/A
ACOXL	7	0	1	turTru2,susScr3,cerSim1,loxAfr3,triMan1,dasNov3,hg19	#N/A	dasNov3
ADCY2	6	0	0	orcOrc1,cerSim1,loxAfr3,triMan1,dasNov3,hetGla2	#N/A	#N/A
ACSM1	5	1	1	odoRosDi,susScr3,cerSim1,triMan1,hg19	susScr3	susScr3
ACRV1	5	0	0	odoRosDi,cerSim1,loxAfr3,triMan1,hg19	#N/A	#N/A
ADD1	7	0	0	odoRosDi,orcOrc1,susScr3,loxAfr3,triMan1,dasNov3,hg19	#N/A	#N/A
ADH7	5	0	0	susScr3,cerSim1,loxAfr3,triMan1,dasNov3	#N/A	#N/A
ACTA2	#N/A	#N/A	#N/A	#N/A	#N/A	#N/A
ACTL7B	10	0	0	odoRosDi,orcOrc1,turTru2,susScr3,cerSim1,loxAfr3,triMan1,dasNov3,hetGla2,hg19	#N/A	#N/A
ACTR2	#N/A	#N/A	#N/A	#N/A	#N/A	#N/A
ACVR1B	6	0	0	turTru2,susScr3,cerSim1,loxAfr3,triMan1,dasNov3	#N/A	#N/A
ADM5	4	0	0	odoRosDi,cerSim1,loxAfr3,triMan1	#N/A	#N/A
ADPRHL1	4	0	0	odoRosDi,susScr3,cerSim1,loxAfr3	#N/A	#N/A
ADAD1	7	0	1	odoRosDi,orcOrc1,cerSim1,loxAfr3,triMan1,dasNov3,hetGla2	#N/A	hetGla2
ADAM1A	8	0	1	odoRosDi,orcOrc1,turTru2,susScr3,cerSim1,loxAfr3,triMan1,hg19	#N/A	odoRosDi
ADRB1	4	1	2	turTru2,loxAfr3,triMan1,hg19	turTru2	turTru2,loxAfr3
AEBP1	7	0	0	orcOrc1,turTru2,susScr3,cerSim1,dasNov3,hetGla2,hg19	#N/A	#N/A
ADAM30	7	0	0	orcOrc1,turTru2,cerSim1,loxAfr3,triMan1,dasNov3,hg19	#N/A	#N/A
ADAMTS3	8	0	0	odoRosDi,turTru2,cerSim1,loxAfr3,triMan1,dasNov3,hetGla2,hg19	#N/A	#N/A
ADAMTS13	7	0	0	odoRosDi,orcOrc1,loxAfr3,triMan1,dasNov3,hetGla2,hg19	#N/A	#N/A
ADAMTSL4	8	0	0	odoRosDi,turTru2,susScr3,cerSim1,loxAfr3,triMan1,dasNov3,hetGla2	#N/A	#N/A
AFF1	6	0	0	odoRosDi,turTru2,susScr3,loxAfr3,triMan1,dasNov3	#N/A	#N/A
AGAP1	7	0	0	odoRosDi,cerSim1,loxAfr3,triMan1,dasNov3,hetGla2,hg19	#N/A	#N/A
AKAP11	8	1	1	orcOrc1,susScr3,cerSim1,loxAfr3,triMan1,dasNov3,hetGla2,hg19	susScr3	susScr3
AKAP7	8	1	1	odoRosDi,orcOrc1,susScr3,cerSim1,loxAfr3,triMan1,dasNov3,hetGla2	hetGla2	hetGla2
AGO3	1	0	0	triMan1	#N/A	#N/A
AGER	6	0	0	odoRosDi,cerSim1,triMan1,dasNov3,hetGla2,hg19	#N/A	#N/A
AKR1B10	4	0	0	cerSim1,dasNov3,hetGla2,hg19	#N/A	#N/A
AGPHD1	3	0	0	turTru2,hetGla2,hg19	#N/A	#N/A
AGTRAP	4	0	0	odoRosDi,turTru2,cerSim1,dasNov3	#N/A	#N/A
AKR7L	6	0	0	turTru2,susScr3,cerSim1,loxAfr3,hetGla2,hg19	#N/A	#N/A
AL833346	5	0	0	odoRosDi,triMan1,dasNov3,hetGla2,hg19	#N/A	#N/A
AHI1	6	0	0	orcOrc1,susScr3,cerSim1,triMan1,hetGla2,hg19	#N/A	#N/A
AIDA	3	0	0	susScr3,dasNov3,hetGla2	#N/A	#N/A
ALDH3B1	6	0	0	odoRosDi,cerSim1,triMan1,dasNov3,hetGla2,hg19	#N/A	#N/A
ALDH1A2	3	0	0	loxAfr3,hetGla2,hg19	#N/A	#N/A
AIMP2	9	0	0	odoRosDi,turTru2,susScr3,cerSim1,loxAfr3,triMan1,dasNov3,hetGla2,hg19	#N/A	#N/A
AK055272	3	0	0	cerSim1,triMan1,hetGla2	#N/A	#N/A
AK092965	5	0	0	turTru2,susScr3,loxAfr3,triMan1,dasNov3	#N/A	#N/A
AK096995	3	0	0	orcOrc1,loxAfr3,dasNov3	#N/A	#N/A
ALDOC	5	0	0	odoRosDi,susScr3,cerSim1,triMan1,dasNov3	#N/A	#N/A
ALG3	7	0	1	odoRosDi,orcOrc1,susScr3,cerSim1,triMan1,hetGla2,hg19	#N/A	triMan1
AK124121	2	0	1	orcOrc1,susScr3	#N/A	susScr3
AK125726	5	1	1	odoRosDi,cerSim1,loxAfr3,triMan1,hetGla2	cerSim1	cerSim1
ALKBH6	5	0	0	odoRosDi,orcOrc1,cerSim1,loxAfr3,triMan1	#N/A	#N/A
AK128777	2	0	0	hetGla2,hg19	#N/A	#N/A
ALOX15P1	3	0	0	cerSim1,loxAfr3,triMan1	#N/A	#N/A
AK299452	5	0	1	odoRosDi,turTru2,cerSim1,hetGla2,hg19	#N/A	hg19
AK310493	3	0	0	dasNov3,hetGla2,hg19	#N/A	#N/A
ANKRD54	5	0	0	odoRosDi,susScr3,loxAfr3,triMan1,dasNov3	#N/A	#N/A
ALPPL2	4	0	0	cerSim1,loxAfr3,dasNov3,hg19	#N/A	#N/A
ALYREF	1	0	0	triMan1	#N/A	#N/A
ANKS1A	9	0	0	odoRosDi,turTru2,susScr3,cerSim1,loxAfr3,triMan1,dasNov3,hetGla2,hg19	#N/A	#N/A
AMER1	8	0	0	orcOrc1,turTru2,susScr3,cerSim1,loxAfr3,triMan1,hetGla2,hg19	#N/A	#N/A
AMMECR1L	3	0	0	loxAfr3,triMan1,hetGla2	#N/A	#N/A
ANO2	8	0	0	odoRosDi,orcOrc1,turTru2,loxAfr3,triMan1,dasNov3,hetGla2,hg19	#N/A	#N/A
ANP32B	4	0	0	turTru2,dasNov3,hetGla2,hg19	#N/A	#N/A
AOC2	7	0	2	susScr3,cerSim1,loxAfr3,triMan1,dasNov3,hetGla2,hg19	#N/A	dasNov3,hetGla2
ANXA2R	1	0	0	hg19	#N/A	#N/A
AMPH	6	0	0	odoRosDi,cerSim1,loxAfr3,dasNov3,hetGla2,hg19	#N/A	#N/A
ANAPC13	2	1	2	turTru2,loxAfr3	turTru2	turTru2,loxAfr3
AP1S1	#N/A	#N/A	#N/A	#N/A	#N/A	#N/A
AP3D1	3	0	0	odoRosDi,cerSim1,hetGla2	#N/A	#N/A
ANG	4	0	0	odoRosDi,turTru2,susScr3,dasNov3	#N/A	#N/A
ANGPTL7	6	0	0	odoRosDi,orcOrc1,susScr3,cerSim1,dasNov3,hetGla2	#N/A	#N/A
AP5M1	7	0	0	odoRosDi,orcOrc1,susScr3,loxAfr3,triMan1,dasNov3,hetGla2	#N/A	#N/A
APBB3	8	0	1	odoRosDi,turTru2,susScr3,loxAfr3,triMan1,dasNov3,hetGla2,hg19	#N/A	hg19
ANKFY1	8	0	0	odoRosDi,susScr3,cerSim1,loxAfr3,triMan1,dasNov3,hetGla2,hg19	#N/A	#N/A
ANKRD10	8	0	0	odoRosDi,turTru2,susScr3,cerSim1,triMan1,dasNov3,hetGla2,hg19	#N/A	#N/A
APH1B	7	0	0	odoRosDi,orcOrc1,cerSim1,loxAfr3,triMan1,dasNov3,hetGla2	#N/A	#N/A
APOA1BP	6	0	0	odoRosDi,turTru2,cerSim1,dasNov3,hetGla2,hg19	#N/A	#N/A
APOBEC3F	1	0	0	hg19	#N/A	#N/A
APOH	5	0	0	odoRosDi,orcOrc1,cerSim1,triMan1,hg19	#N/A	#N/A
ANKRD18B	5	0	0	susScr3,cerSim1,triMan1,dasNov3,hetGla2	#N/A	#N/A
ANKRD26	4	0	0	turTru2,triMan1,dasNov3,hg19	#N/A	#N/A
APOO	5	0	0	odoRosDi,orcOrc1,susScr3,cerSim1,triMan1	#N/A	#N/A
AK124326	4	0	0	odoRosDi,loxAfr3,triMan1,hetGla2	#N/A	#N/A
AQP12B	2	0	0	cerSim1,hg19	#N/A	#N/A
AQR	5	0	1	odoRosDi,cerSim1,triMan1,dasNov3,hetGla2	#N/A	triMan1
ANKRD33	9	0	0	orcOrc1,turTru2,susScr3,cerSim1,loxAfr3,triMan1,dasNov3,hetGla2,hg19	#N/A	#N/A
ANKRD39	6	0	1	orcOrc1,turTru2,susScr3,loxAfr3,dasNov3,hetGla2	#N/A	hetGla2
ARF3	#N/A	#N/A	#N/A	#N/A	#N/A	#N/A
ARFIP2	5	0	0	cerSim1,triMan1,dasNov3,hetGla2,hg19	#N/A	#N/A
ARID2	6	0	0	orcOrc1,susScr3,cerSim1,loxAfr3,hetGla2,hg19	#N/A	#N/A
ARMC10	7	1	1	odoRosDi,susScr3,loxAfr3,triMan1,dasNov3,hetGla2,hg19	odoRosDi	odoRosDi
ARMC9	7	0	0	odoRosDi,orcOrc1,susScr3,loxAfr3,dasNov3,hetGla2,hg19	#N/A	#N/A
ARHGAP15	4	0	0	cerSim1,loxAfr3,hetGla2,hg19	#N/A	#N/A
ARHGAP25	5	0	0	orcOrc1,susScr3,cerSim1,triMan1,hetGla2	#N/A	#N/A
ARIH2	3	0	0	triMan1,dasNov3,hg19	#N/A	#N/A
ARL17A	1	0	0	cerSim1	#N/A	#N/A
ARL5B	1	0	0	hetGla2	#N/A	#N/A
ARHGAP36	6	0	1	odoRosDi,cerSim1,triMan1,dasNov3,hetGla2,hg19	#N/A	hetGla2
ARHGDIB	3	0	0	turTru2,susScr3,dasNov3	#N/A	#N/A
ARHGEF19	7	0	0	odoRosDi,orcOrc1,turTru2,susScr3,triMan1,hetGla2,hg19	#N/A	#N/A
ARHGEF39	7	0	0	odoRosDi,turTru2,cerSim1,loxAfr3,triMan1,dasNov3,hetGla2	#N/A	#N/A
ARNTL2	7	0	0	odoRosDi,orcOrc1,susScr3,loxAfr3,triMan1,dasNov3,hg19	#N/A	#N/A
ARPP19	3	0	0	turTru2,cerSim1,triMan1	#N/A	#N/A
ARSA	4	0	0	susScr3,cerSim1,dasNov3,hg19	#N/A	#N/A
ART1	6	0	0	turTru2,susScr3,loxAfr3,triMan1,dasNov3,hetGla2	#N/A	#N/A
ASAH2B	4	0	0	susScr3,cerSim1,loxAfr3,dasNov3	#N/A	#N/A
ASB15	8	0	0	odoRosDi,orcOrc1,susScr3,cerSim1,loxAfr3,triMan1,dasNov3,hetGla2	#N/A	#N/A
ASB7	0	0	0	#N/A	#N/A	#N/A
ASCL5	3	0	0	loxAfr3,triMan1,hg19	#N/A	#N/A
ATP6V1A	3	0	0	susScr3,cerSim1,hetGla2	#N/A	#N/A
ATP6V1G2	3	0	0	cerSim1,loxAfr3,hetGla2	#N/A	#N/A
ASIC3	6	0	0	odoRosDi,turTru2,susScr3,cerSim1,triMan1,hetGla2	#N/A	#N/A
ASPA	8	0	1	orcOrc1,turTru2,susScr3,cerSim1,loxAfr3,triMan1,dasNov3,hetGla2	#N/A	turTru2
ATP8B4	6	0	0	odoRosDi,orcOrc1,turTru2,cerSim1,loxAfr3,triMan1	#N/A	#N/A
ARL1	0	0	0	#N/A	#N/A	#N/A
ASRGL1	7	0	0	orcOrc1,turTru2,cerSim1,loxAfr3,triMan1,dasNov3,hg19	#N/A	#N/A
ASZ1	6	0	0	turTru2,susScr3,cerSim1,triMan1,hetGla2,hg19	#N/A	#N/A
ATR	8	0	0	orcOrc1,turTru2,susScr3,loxAfr3,triMan1,dasNov3,hetGla2,hg19	#N/A	#N/A
ATXN7L3B	1	0	0	cerSim1	#N/A	#N/A
ATE1	9	0	0	orcOrc1,turTru2,susScr3,cerSim1,loxAfr3,triMan1,dasNov3,hetGla2,hg19	#N/A	#N/A
ATF7	6	0	0	odoRosDi,susScr3,cerSim1,triMan1,dasNov3,hetGla2	#N/A	#N/A
AVP	5	0	0	susScr3,cerSim1,triMan1,dasNov3,hg19	#N/A	#N/A
AUTS2	6	0	0	orcOrc1,turTru2,susScr3,cerSim1,dasNov3,hetGla2	#N/A	#N/A
AB231702	3	0	0	odoRosDi,dasNov3,hetGla2	#N/A	#N/A
AX746631	0	0	0	#N/A	#N/A	#N/A
AX746903	4	0	0	susScr3,cerSim1,loxAfr3,hg19	#N/A	#N/A
ATG4A	5	0	0	susScr3,cerSim1,loxAfr3,dasNov3,hetGla2	#N/A	#N/A
ATL1	6	0	0	odoRosDi,susScr3,cerSim1,loxAfr3,triMan1,dasNov3	#N/A	#N/A
AX747325	1	0	0	triMan1	#N/A	#N/A
AX747659	1	0	0	orcOrc1	#N/A	#N/A
ATP10A	9	0	0	odoRosDi,orcOrc1,turTru2,susScr3,cerSim1,triMan1,dasNov3,hetGla2,hg19	#N/A	#N/A
ATP13A4	9	0	2	odoRosDi,orcOrc1,turTru2,susScr3,cerSim1,loxAfr3,triMan1,dasNov3,hg19	#N/A	orcOrc1,triMan1
AXL	4	0	1	orcOrc1,loxAfr3,dasNov3,hetGla2	#N/A	dasNov3
AX748201	5	0	0	cerSim1,triMan1,dasNov3,hetGla2,hg19	#N/A	#N/A
ATP2A1	8	1	1	odoRosDi,turTru2,susScr3,cerSim1,loxAfr3,triMan1,dasNov3,hetGla2	triMan1	triMan1
ATP4B	5	0	0	orcOrc1,turTru2,loxAfr3,hetGla2,hg19	#N/A	#N/A
ATP5H	6	0	0	odoRosDi,cerSim1,loxAfr3,triMan1,dasNov3,hetGla2	#N/A	#N/A
ATP6AP2	5	0	0	odoRosDi,cerSim1,loxAfr3,dasNov3,hetGla2	#N/A	#N/A
B3GALT1	3	0	0	triMan1,dasNov3,hetGla2	#N/A	#N/A
B3GNT2	4	0	0	odoRosDi,turTru2,cerSim1,triMan1	#N/A	#N/A
B4GALNT2	10	1	2	odoRosDi,orcOrc1,turTru2,susScr3,cerSim1,loxAfr3,triMan1,dasNov3,hetGla2,hg19	turTru2	turTru2,susScr3
B9D1	8	0	0	odoRosDi,turTru2,cerSim1,loxAfr3,triMan1,dasNov3,hetGla2,hg19	#N/A	#N/A
BAD	6	0	1	odoRosDi,susScr3,cerSim1,loxAfr3,triMan1,hetGla2	#N/A	triMan1
BAI2	6	0	0	odoRosDi,susScr3,loxAfr3,triMan1,hetGla2,hg19	#N/A	#N/A
ALOX15	3	0	0	cerSim1,dasNov3,hg19	#N/A	#N/A
BANF2	5	0	1	odoRosDi,triMan1,dasNov3,hetGla2,hg19	#N/A	dasNov3
BATF2	6	0	1	odoRosDi,turTru2,susScr3,cerSim1,hetGla2,hg19	#N/A	hetGla2
BICC1	7	0	0	odoRosDi,turTru2,susScr3,cerSim1,triMan1,dasNov3,hg19	#N/A	#N/A
BBOX1	7	0	1	turTru2,susScr3,cerSim1,loxAfr3,triMan1,dasNov3,hetGla2	#N/A	hetGla2
BC010030	1	0	0	odoRosDi	#N/A	#N/A
BIRC5	3	0	0	cerSim1,triMan1,hg19	#N/A	#N/A
BC040865	2	0	1	cerSim1,hg19	#N/A	hg19
BC032910	2	0	0	odoRosDi,turTru2	#N/A	#N/A
AX746654	5	0	0	turTru2,loxAfr3,triMan1,hetGla2,hg19	#N/A	#N/A
BLNK	8	0	0	turTru2,susScr3,cerSim1,loxAfr3,triMan1,dasNov3,hetGla2,hg19	#N/A	#N/A
BMP10	8	0	0	odoRosDi,orcOrc1,turTru2,susScr3,cerSim1,loxAfr3,triMan1,dasNov3	#N/A	#N/A
BC063788	5	0	1	odoRosDi,susScr3,dasNov3,hetGla2,hg19	#N/A	dasNov3
BC093087	4	0	0	susScr3,cerSim1,dasNov3,hg19	#N/A	#N/A
BC118554	3	0	0	turTru2,loxAfr3,triMan1	#N/A	#N/A
BC171856	3	0	0	orcOrc1,cerSim1,hetGla2	#N/A	#N/A
BMP8A	7	0	0	orcOrc1,turTru2,susScr3,loxAfr3,triMan1,dasNov3,hg19	#N/A	#N/A
BNIP1	4	0	1	turTru2,cerSim1,loxAfr3,dasNov3	#N/A	cerSim1
BCAS2	2	0	1	turTru2,loxAfr3	#N/A	turTru2
BCKDK	6	0	1	susScr3,cerSim1,loxAfr3,triMan1,dasNov3,hetGla2	#N/A	hetGla2
BOLA1	5	0	0	susScr3,triMan1,dasNov3,hetGla2,hg19	#N/A	#N/A
BPIFA3	4	0	0	odoRosDi,cerSim1,hetGla2,hg19	#N/A	#N/A
ADM	4	0	2	cerSim1,loxAfr3,triMan1,hetGla2	#N/A	cerSim1,hetGla2
ANXA3	5	0	0	odoRosDi,turTru2,triMan1,hetGla2,hg19	#N/A	#N/A
BRAF	7	0	0	odoRosDi,susScr3,cerSim1,loxAfr3,triMan1,dasNov3,hetGla2	#N/A	#N/A
BCL2L15	5	0	0	cerSim1,loxAfr3,triMan1,dasNov3,hetGla2	#N/A	#N/A
BCL9L	5	0	0	turTru2,susScr3,dasNov3,hetGla2,hg19	#N/A	#N/A
BRD7	7	0	0	odoRosDi,turTru2,cerSim1,loxAfr3,triMan1,dasNov3,hetGla2	#N/A	#N/A
AMACR	8	0	0	odoRosDi,orcOrc1,turTru2,susScr3,cerSim1,triMan1,dasNov3,hetGla2	#N/A	#N/A
BDH1	7	0	3	orcOrc1,turTru2,susScr3,cerSim1,triMan1,dasNov3,hg19	#N/A	orcOrc1,turTru2,triMan1
BHLHA15	5	0	0	odoRosDi,susScr3,cerSim1,hetGla2,hg19	#N/A	#N/A
BEND3	5	0	0	odoRosDi,cerSim1,triMan1,dasNov3,hg19	#N/A	#N/A
BET1	2	0	0	loxAfr3,hetGla2	#N/A	#N/A
BRIP1	9	0	1	odoRosDi,orcOrc1,turTru2,susScr3,cerSim1,triMan1,dasNov3,hetGla2,hg19	#N/A	hg19
BSPH1	3	0	0	susScr3,cerSim1,hg19	#N/A	#N/A
BRSK2	3	0	0	turTru2,dasNov3,hetGla2	#N/A	#N/A
BTBD18	7	1	1	odoRosDi,susScr3,cerSim1,triMan1,dasNov3,hetGla2,hg19	hetGla2	hetGla2
AX747684	8	0	0	orcOrc1,susScr3,cerSim1,loxAfr3,triMan1,dasNov3,hetGla2,hg19	#N/A	#N/A
BTD	6	0	0	turTru2,susScr3,cerSim1,triMan1,hetGla2,hg19	#N/A	#N/A
BTN2A1	6	0	0	orcOrc1,turTru2,triMan1,dasNov3,hetGla2,hg19	#N/A	#N/A
BTRC	5	0	1	odoRosDi,susScr3,cerSim1,dasNov3,hetGla2	#N/A	hetGla2
BX648961	4	0	0	odoRosDi,cerSim1,triMan1,hetGla2	#N/A	#N/A
C10orf113	5	0	0	odoRosDi,orcOrc1,cerSim1,loxAfr3,hetGla2	#N/A	#N/A
C10orf2	8	0	0	orcOrc1,turTru2,susScr3,cerSim1,loxAfr3,triMan1,hetGla2,hg19	#N/A	#N/A
C10orf76	5	0	0	turTru2,cerSim1,loxAfr3,dasNov3,hetGla2	#N/A	#N/A
C11orf30	7	1	1	odoRosDi,turTru2,susScr3,cerSim1,loxAfr3,triMan1,hetGla2	turTru2	turTru2
C11orf54	3	0	0	odoRosDi,cerSim1,triMan1	#N/A	#N/A
C11orf74	7	0	0	odoRosDi,orcOrc1,turTru2,loxAfr3,triMan1,hetGla2,hg19	#N/A	#N/A
BC040901	5	0	0	odoRosDi,orcOrc1,susScr3,dasNov3,hg19	#N/A	#N/A
C11orf93	7	0	0	susScr3,cerSim1,loxAfr3,triMan1,dasNov3,hetGla2,hg19	#N/A	#N/A
C12orf40	9	0	0	orcOrc1,turTru2,susScr3,cerSim1,loxAfr3,triMan1,dasNov3,hetGla2,hg19	#N/A	#N/A
AK097351	1	0	0	cerSim1	#N/A	#N/A
AX747367	7	0	0	odoRosDi,turTru2,susScr3,cerSim1,loxAfr3,dasNov3,hg19	#N/A	#N/A
C12orf55	7	0	0	odoRosDi,cerSim1,loxAfr3,triMan1,dasNov3,hetGla2,hg19	#N/A	#N/A
C12orf71	3	0	0	triMan1,dasNov3,hg19	#N/A	#N/A
C14orf142	8	0	0	odoRosDi,orcOrc1,susScr3,cerSim1,loxAfr3,triMan1,dasNov3,hetGla2	#N/A	#N/A
C14orf23	6	0	0	cerSim1,loxAfr3,triMan1,dasNov3,hetGla2,hg19	#N/A	#N/A
AK097370	3	0	0	turTru2,cerSim1,triMan1	#N/A	#N/A
C15orf32	2	0	0	odoRosDi,hetGla2	#N/A	#N/A
C15orf54	6	0	0	odoRosDi,susScr3,cerSim1,dasNov3,hetGla2,hg19	#N/A	#N/A
C16orf46	8	0	0	odoRosDi,orcOrc1,turTru2,cerSim1,loxAfr3,triMan1,hetGla2,hg19	#N/A	#N/A
C16orf74	5	0	0	susScr3,cerSim1,triMan1,dasNov3,hetGla2	#N/A	#N/A
C16orf93	5	0	0	turTru2,cerSim1,triMan1,hetGla2,hg19	#N/A	#N/A
C17orf107	6	0	0	susScr3,cerSim1,loxAfr3,triMan1,hetGla2,hg19	#N/A	#N/A
BC014150	8	0	0	odoRosDi,orcOrc1,turTru2,susScr3,cerSim1,triMan1,dasNov3,hetGla2	#N/A	#N/A
ANAPC15	0	0	0	#N/A	#N/A	#N/A
C17orf67	8	0	0	odoRosDi,susScr3,cerSim1,loxAfr3,triMan1,dasNov3,hetGla2,hg19	#N/A	#N/A
C17orf85	4	0	0	loxAfr3,triMan1,dasNov3,hetGla2	#N/A	#N/A
C18orf56	5	0	0	turTru2,cerSim1,loxAfr3,triMan1,hg19	#N/A	#N/A
C19orf33	5	0	0	odoRosDi,orcOrc1,cerSim1,triMan1,hetGla2	#N/A	#N/A
AB231705	7	0	1	odoRosDi,orcOrc1,turTru2,cerSim1,loxAfr3,dasNov3,hg19	#N/A	hg19
C19orf53	5	0	0	turTru2,susScr3,triMan1,dasNov3,hetGla2	#N/A	#N/A
C19orf70	6	0	0	orcOrc1,cerSim1,loxAfr3,triMan1,dasNov3,hetGla2	#N/A	#N/A
C1orf101	8	0	0	odoRosDi,turTru2,susScr3,cerSim1,loxAfr3,triMan1,hetGla2,hg19	#N/A	#N/A
C1orf123	4	0	0	susScr3,cerSim1,loxAfr3,triMan1	#N/A	#N/A
C1orf168	8	0	0	orcOrc1,turTru2,cerSim1,loxAfr3,triMan1,dasNov3,hetGla2,hg19	#N/A	#N/A
BC033456	4	0	0	odoRosDi,cerSim1,triMan1,hg19	#N/A	#N/A
C1orf95	4	0	3	orcOrc1,turTru2,loxAfr3,hetGla2	#N/A	turTru2,loxAfr3,hetGla2
C1QTNF2	5	0	0	odoRosDi,cerSim1,triMan1,hetGla2,hg19	#N/A	#N/A
ACOT2	7	1	1	susScr3,cerSim1,loxAfr3,triMan1,dasNov3,hetGla2,hg19	susScr3	susScr3
C1R	8	0	0	odoRosDi,orcOrc1,turTru2,susScr3,cerSim1,triMan1,hetGla2,hg19	#N/A	#N/A
C20orf196	5	1	1	susScr3,cerSim1,dasNov3,hetGla2,hg19	dasNov3	dasNov3
C1orf194	6	0	0	odoRosDi,susScr3,loxAfr3,triMan1,dasNov3,hetGla2	#N/A	#N/A
C1orf233	1	0	0	susScr3	#N/A	#N/A
C1orf61	4	0	0	odoRosDi,turTru2,dasNov3,hg19	#N/A	#N/A
C21orf128	6	0	0	orcOrc1,turTru2,susScr3,loxAfr3,triMan1,hg19	#N/A	#N/A
C22orf24	7	0	1	orcOrc1,susScr3,cerSim1,loxAfr3,triMan1,hetGla2,hg19	#N/A	hetGla2
C2CD4B	2	0	0	susScr3,hg19	#N/A	#N/A
C2orf47	8	0	0	odoRosDi,orcOrc1,cerSim1,loxAfr3,triMan1,dasNov3,hetGla2,hg19	#N/A	#N/A
C2orf69	4	0	0	odoRosDi,cerSim1,loxAfr3,triMan1	#N/A	#N/A
C2orf82	1	0	0	hetGla2	#N/A	#N/A
AP1S2	#N/A	#N/A	#N/A	#N/A	#N/A	#N/A
ACTBL2	8	0	2	orcOrc1,turTru2,susScr3,cerSim1,loxAfr3,triMan1,dasNov3,hg19	#N/A	turTru2,triMan1
C3orf22	4	0	0	turTru2,loxAfr3,dasNov3,hg19	#N/A	#N/A
C3orf55	4	0	0	odoRosDi,cerSim1,loxAfr3,dasNov3	#N/A	#N/A
C3orf83	7	0	1	odoRosDi,turTru2,cerSim1,loxAfr3,triMan1,dasNov3,hg19	#N/A	turTru2
C4orf26	6	0	1	orcOrc1,loxAfr3,triMan1,dasNov3,hetGla2,hg19	#N/A	triMan1
C4orf47	6	0	0	turTru2,susScr3,loxAfr3,triMan1,hetGla2,hg19	#N/A	#N/A
C5orf30	4	0	0	susScr3,loxAfr3,dasNov3,hetGla2	#N/A	#N/A
C5orf54	5	0	0	odoRosDi,susScr3,loxAfr3,dasNov3,hetGla2	#N/A	#N/A
C6orf132	5	0	0	odoRosDi,orcOrc1,turTru2,hetGla2,hg19	#N/A	#N/A
C6orf201	8	0	0	odoRosDi,orcOrc1,turTru2,susScr3,cerSim1,loxAfr3,triMan1,hg19	#N/A	#N/A
C6orf57	6	0	0	odoRosDi,orcOrc1,susScr3,cerSim1,dasNov3,hetGla2	#N/A	#N/A
APOBEC3H	5	0	0	susScr3,loxAfr3,triMan1,hetGla2,hg19	#N/A	#N/A
C7orf31	7	0	0	odoRosDi,susScr3,cerSim1,loxAfr3,triMan1,dasNov3,hg19	#N/A	#N/A
C7orf62	8	0	0	odoRosDi,turTru2,susScr3,cerSim1,triMan1,dasNov3,hetGla2,hg19	#N/A	#N/A
C8orf22	4	0	0	orcOrc1,susScr3,cerSim1,hetGla2	#N/A	#N/A
C8orf59	4	0	0	cerSim1,triMan1,dasNov3,hetGla2	#N/A	#N/A
C9orf123	5	0	0	odoRosDi,cerSim1,loxAfr3,triMan1,hetGla2	#N/A	#N/A
C9orf41	4	0	0	cerSim1,triMan1,dasNov3,hetGla2	#N/A	#N/A
C9orf169	5	0	0	odoRosDi,susScr3,cerSim1,dasNov3,hetGla2	#N/A	#N/A
ACTR3B	2	0	0	loxAfr3,triMan1	#N/A	#N/A
BSPRY	4	0	0	odoRosDi,cerSim1,loxAfr3,dasNov3	#N/A	#N/A
AL953854.2-002	0	0	0	#N/A	#N/A	#N/A
AK055601	4	0	0	odoRosDi,loxAfr3,triMan1,dasNov3	#N/A	#N/A
C18orf63	7	0	1	orcOrc1,turTru2,cerSim1,triMan1,dasNov3,hetGla2,hg19	#N/A	triMan1
BC094791	5	2	1	odoRosDi,orcOrc1,susScr3,cerSim1,hg19	cerSim1,hg19	hg19
AK130486	3	0	0	turTru2,cerSim1,hetGla2	#N/A	#N/A
AK094577	4	0	0	susScr3,cerSim1,hetGla2,hg19	#N/A	#N/A
BC127192	5	0	0	orcOrc1,loxAfr3,triMan1,dasNov3,hetGla2	#N/A	#N/A
C15orf37	1	0	0	loxAfr3	#N/A	#N/A
C1orf27	6	0	0	odoRosDi,orcOrc1,turTru2,susScr3,cerSim1,hetGla2	#N/A	#N/A
AKT1	2	0	0	triMan1,hetGla2	#N/A	#N/A
AMMECR1	3	0	1	loxAfr3,triMan1,dasNov3	#N/A	loxAfr3
ANAPC16	0	0	0	#N/A	#N/A	#N/A
ALAD	4	0	0	odoRosDi,orcOrc1,cerSim1,hetGla2	#N/A	#N/A
BIRC6	9	0	0	odoRosDi,orcOrc1,turTru2,susScr3,loxAfr3,triMan1,dasNov3,hetGla2,hg19	#N/A	#N/A
AK2	7	0	3	odoRosDi,susScr3,cerSim1,loxAfr3,triMan1,dasNov3,hetGla2	#N/A	cerSim1,triMan1,dasNov3
BYSL	6	0	0	odoRosDi,orcOrc1,loxAfr3,triMan1,dasNov3,hetGla2	#N/A	#N/A
C3orf56	2	0	0	cerSim1,hetGla2	#N/A	#N/A
C1QA	6	0	0	odoRosDi,susScr3,cerSim1,loxAfr3,hetGla2,hg19	#N/A	#N/A
AK130759	3	0	0	orcOrc1,triMan1,hg19	#N/A	#N/A
C9orf78	4	0	0	susScr3,loxAfr3,dasNov3,hetGla2	#N/A	#N/A
CA11	6	0	0	odoRosDi,orcOrc1,susScr3,loxAfr3,triMan1,hetGla2	#N/A	#N/A
CA5B	6	2	2	odoRosDi,susScr3,cerSim1,triMan1,dasNov3,hetGla2	odoRosDi,triMan1	odoRosDi,triMan1
CABLES2	8	0	1	orcOrc1,turTru2,cerSim1,loxAfr3,triMan1,dasNov3,hetGla2,hg19	#N/A	turTru2
CACNA1A	5	0	0	odoRosDi,turTru2,susScr3,cerSim1,hetGla2	#N/A	#N/A
CACNA2D1	5	0	0	susScr3,loxAfr3,triMan1,hetGla2,hg19	#N/A	#N/A
CACNG3	2	0	0	dasNov3,hetGla2	#N/A	#N/A
CADM1	5	0	0	susScr3,loxAfr3,triMan1,dasNov3,hetGla2	#N/A	#N/A
CALCA	5	0	0	susScr3,cerSim1,loxAfr3,hetGla2,hg19	#N/A	#N/A
CALM1	#N/A	#N/A	#N/A	#N/A	#N/A	#N/A
CALU	3	0	0	susScr3,dasNov3,hetGla2	#N/A	#N/A
CAMK2N2	#N/A	#N/A	#N/A	#N/A	#N/A	#N/A
CAMSAP3	8	0	0	orcOrc1,turTru2,susScr3,loxAfr3,triMan1,dasNov3,hetGla2,hg19	#N/A	#N/A
CAPN10	5	0	0	orcOrc1,loxAfr3,triMan1,dasNov3,hg19	#N/A	#N/A
CAPN7	6	0	1	odoRosDi,turTru2,loxAfr3,triMan1,dasNov3,hg19	#N/A	turTru2
CASP9	7	0	0	odoRosDi,orcOrc1,cerSim1,loxAfr3,triMan1,hetGla2,hg19	#N/A	#N/A
CAPZA1	2	0	0	triMan1,dasNov3	#N/A	#N/A
CARD8	0	0	0	#N/A	#N/A	#N/A
CASP16	7	0	0	odoRosDi,orcOrc1,turTru2,susScr3,cerSim1,loxAfr3,triMan1	#N/A	#N/A
CASC3	5	0	0	odoRosDi,susScr3,loxAfr3,dasNov3,hetGla2	#N/A	#N/A
CATSPER3	8	0	0	odoRosDi,turTru2,cerSim1,loxAfr3,triMan1,dasNov3,hetGla2,hg19	#N/A	#N/A
CBFB	1	0	0	dasNov3	#N/A	#N/A
CBR3	5	0	0	odoRosDi,susScr3,triMan1,dasNov3,hetGla2	#N/A	#N/A
CBX4	2	0	0	susScr3,hetGla2	#N/A	#N/A
CC2D2B	8	0	0	orcOrc1,turTru2,susScr3,cerSim1,loxAfr3,triMan1,dasNov3,hg19	#N/A	#N/A
CCDC104	4	0	0	odoRosDi,loxAfr3,triMan1,dasNov3	#N/A	#N/A
CCDC114	5	0	0	susScr3,loxAfr3,triMan1,dasNov3,hetGla2	#N/A	#N/A
CCDC126	8	0	1	odoRosDi,susScr3,cerSim1,loxAfr3,triMan1,dasNov3,hetGla2,hg19	#N/A	odoRosDi
CCDC138	7	0	0	orcOrc1,susScr3,cerSim1,loxAfr3,triMan1,dasNov3,hg19	#N/A	#N/A
CCDC149	6	0	0	odoRosDi,orcOrc1,turTru2,loxAfr3,triMan1,hetGla2	#N/A	#N/A
C17orf70	8	0	0	odoRosDi,turTru2,cerSim1,loxAfr3,triMan1,dasNov3,hetGla2,hg19	#N/A	#N/A
C21orf2	6	0	1	orcOrc1,turTru2,susScr3,cerSim1,dasNov3,hg19	#N/A	dasNov3
C19orf54	7	0	0	odoRosDi,orcOrc1,turTru2,cerSim1,loxAfr3,triMan1,hg19	#N/A	#N/A
C8orf33	4	0	0	odoRosDi,orcOrc1,turTru2,cerSim1	#N/A	#N/A
C19orf71	9	0	0	odoRosDi,orcOrc1,turTru2,susScr3,loxAfr3,triMan1,dasNov3,hetGla2,hg19	#N/A	#N/A
AK310526	4	0	0	loxAfr3,triMan1,hetGla2,hg19	#N/A	#N/A
ANGPT1	8	0	1	orcOrc1,turTru2,susScr3,cerSim1,loxAfr3,triMan1,dasNov3,hetGla2	#N/A	hetGla2
C14orf159	9	0	4	odoRosDi,orcOrc1,susScr3,cerSim1,loxAfr3,triMan1,dasNov3,hetGla2,hg19	#N/A	odoRosDi,susScr3,cerSim1,hg19
C19orf35	6	0	0	odoRosDi,orcOrc1,turTru2,loxAfr3,triMan1,hg19	#N/A	#N/A
ANKRD40	6	0	0	odoRosDi,susScr3,loxAfr3,dasNov3,hetGla2,hg19	#N/A	#N/A
C2orf83	2	0	0	cerSim1,hg19	#N/A	#N/A
ATXN7L3	3	0	0	turTru2,cerSim1,hetGla2	#N/A	#N/A
ANAPC1	7	1	1	odoRosDi,orcOrc1,turTru2,loxAfr3,triMan1,dasNov3,hg19	dasNov3	dasNov3
AGXT2L1	8	0	1	orcOrc1,turTru2,susScr3,cerSim1,loxAfr3,triMan1,dasNov3,hetGla2	#N/A	hetGla2
C16orf78	6	0	0	odoRosDi,susScr3,cerSim1,triMan1,dasNov3,hg19	#N/A	#N/A
C3orf27	5	0	0	odoRosDi,cerSim1,loxAfr3,triMan1,dasNov3	#N/A	#N/A
ARPP21	7	1	1	odoRosDi,turTru2,cerSim1,loxAfr3,triMan1,hetGla2,hg19	turTru2	turTru2
AP1S3	5	0	0	cerSim1,loxAfr3,triMan1,dasNov3,hetGla2	#N/A	#N/A
ATP6V1G3	4	0	0	susScr3,loxAfr3,triMan1,hetGla2	#N/A	#N/A
C8orf34	6	0	0	odoRosDi,turTru2,cerSim1,triMan1,dasNov3,hetGla2	#N/A	#N/A
ASB8	5	0	0	turTru2,loxAfr3,triMan1,dasNov3,hetGla2	#N/A	#N/A
AK131516	3	0	0	odoRosDi,cerSim1,hetGla2	#N/A	#N/A
C6orf58	6	0	0	susScr3,cerSim1,loxAfr3,triMan1,dasNov3,hetGla2	#N/A	#N/A
C2orf88	5	0	0	loxAfr3,triMan1,dasNov3,hetGla2,hg19	#N/A	#N/A
CAMK4	6	0	0	odoRosDi,susScr3,cerSim1,triMan1,dasNov3,hetGla2	#N/A	#N/A
BC043529	3	0	0	odoRosDi,turTru2,triMan1	#N/A	#N/A
AARD	2	0	0	turTru2,hg19	#N/A	#N/A
ANKRD55	6	0	0	odoRosDi,orcOrc1,turTru2,susScr3,loxAfr3,hg19	#N/A	#N/A
C8orf74	5	0	0	orcOrc1,cerSim1,loxAfr3,triMan1,hetGla2	#N/A	#N/A
APOA1	8	0	0	odoRosDi,turTru2,susScr3,cerSim1,loxAfr3,triMan1,dasNov3,hetGla2	#N/A	#N/A
AX748210	2	0	0	odoRosDi,hg19	#N/A	#N/A
ADRB2	4	1	1	susScr3,loxAfr3,triMan1,hetGla2	susScr3	susScr3
ADCK1	5	0	0	odoRosDi,susScr3,cerSim1,triMan1,hetGla2	#N/A	#N/A
C2CD4C	3	0	0	dasNov3,hetGla2,hg19	#N/A	#N/A
CALM2	#N/A	#N/A	#N/A	#N/A	#N/A	#N/A
ADPRHL2	7	0	0	orcOrc1,turTru2,susScr3,loxAfr3,triMan1,dasNov3,hetGla2	#N/A	#N/A
C5orf34	8	0	0	odoRosDi,orcOrc1,turTru2,cerSim1,loxAfr3,triMan1,dasNov3,hetGla2	#N/A	#N/A
C9orf16	3	0	1	odoRosDi,susScr3,dasNov3	#N/A	odoRosDi
BANK1	8	0	0	orcOrc1,turTru2,susScr3,cerSim1,triMan1,dasNov3,hetGla2,hg19	#N/A	#N/A
ABHD6	6	0	0	odoRosDi,susScr3,loxAfr3,triMan1,dasNov3,hetGla2	#N/A	#N/A
ACSBG1	7	0	0	odoRosDi,turTru2,cerSim1,triMan1,dasNov3,hetGla2,hg19	#N/A	#N/A
ARF4	0	0	0	#N/A	#N/A	#N/A
C1orf63	4	0	0	odoRosDi,susScr3,cerSim1,dasNov3	#N/A	#N/A
C9orf129	3	0	0	triMan1,hetGla2,hg19	#N/A	#N/A
AX748230	6	0	0	odoRosDi,susScr3,cerSim1,loxAfr3,triMan1,dasNov3	#N/A	#N/A
AQP2	5	0	0	susScr3,cerSim1,triMan1,hetGla2,hg19	#N/A	#N/A
AIF1L	5	1	1	odoRosDi,turTru2,susScr3,hetGla2,hg19	odoRosDi	odoRosDi
CARD9	8	0	0	odoRosDi,orcOrc1,turTru2,cerSim1,loxAfr3,dasNov3,hetGla2,hg19	#N/A	#N/A
C3orf58	2	0	0	loxAfr3,hg19	#N/A	#N/A
ANP32E	7	0	0	odoRosDi,turTru2,cerSim1,loxAfr3,triMan1,dasNov3,hetGla2	#N/A	#N/A
ALKBH7	3	0	0	orcOrc1,dasNov3,hetGla2	#N/A	#N/A
CCDC159	6	0	0	odoRosDi,susScr3,cerSim1,loxAfr3,triMan1,hetGla2	#N/A	#N/A
ADNP2	6	0	0	turTru2,susScr3,cerSim1,loxAfr3,dasNov3,hetGla2	#N/A	#N/A
APOBEC4	5	0	0	odoRosDi,orcOrc1,loxAfr3,triMan1,dasNov3	#N/A	#N/A
CCDC171	7	0	1	odoRosDi,susScr3,loxAfr3,triMan1,dasNov3,hetGla2,hg19	#N/A	hg19
CCDC180	8	1	1	odoRosDi,turTru2,susScr3,cerSim1,loxAfr3,triMan1,dasNov3,hetGla2	triMan1	triMan1
AVPR1A	8	0	0	odoRosDi,orcOrc1,turTru2,susScr3,cerSim1,triMan1,dasNov3,hg19	#N/A	#N/A
AARS2	5	0	0	odoRosDi,cerSim1,loxAfr3,hetGla2,hg19	#N/A	#N/A
CCDC28B	4	0	0	odoRosDi,loxAfr3,dasNov3,hetGla2	#N/A	#N/A
CCDC41	8	0	0	odoRosDi,orcOrc1,turTru2,cerSim1,loxAfr3,triMan1,dasNov3,hetGla2	#N/A	#N/A
CCDC58	1	0	0	hetGla2	#N/A	#N/A
CCDC67	8	0	0	odoRosDi,orcOrc1,turTru2,cerSim1,loxAfr3,triMan1,dasNov3,hg19	#N/A	#N/A
C6orf203	5	0	0	turTru2,cerSim1,triMan1,hetGla2,hg19	#N/A	#N/A
CD207	5	0	0	orcOrc1,cerSim1,loxAfr3,triMan1,hetGla2	#N/A	#N/A
AK124439	6	0	0	odoRosDi,turTru2,cerSim1,triMan1,hetGla2,hg19	#N/A	#N/A
CCDC77	8	0	0	odoRosDi,orcOrc1,cerSim1,loxAfr3,triMan1,dasNov3,hetGla2,hg19	#N/A	#N/A
ABHD16A	4	0	0	odoRosDi,loxAfr3,triMan1,dasNov3	#N/A	#N/A
CCDC85B	3	0	0	loxAfr3,dasNov3,hg19	#N/A	#N/A
CD28	6	0	0	odoRosDi,susScr3,cerSim1,triMan1,dasNov3,hetGla2	#N/A	#N/A
ANHX	2	0	0	odoRosDi,turTru2	#N/A	#N/A
CCDC91	6	0	0	odoRosDi,susScr3,loxAfr3,triMan1,hetGla2,hg19	#N/A	#N/A
CD300LG	10	0	0	odoRosDi,orcOrc1,turTru2,susScr3,cerSim1,loxAfr3,triMan1,dasNov3,hetGla2,hg19	#N/A	#N/A
CCKAR	3	0	0	susScr3,cerSim1,hetGla2	#N/A	#N/A
CD55	9	0	0	odoRosDi,orcOrc1,turTru2,cerSim1,loxAfr3,triMan1,dasNov3,hetGla2,hg19	#N/A	#N/A
CD3G	4	0	0	odoRosDi,cerSim1,dasNov3,hetGla2	#N/A	#N/A
CDCA8	7	0	0	odoRosDi,cerSim1,loxAfr3,triMan1,dasNov3,hetGla2,hg19	#N/A	#N/A
CDC5L	5	0	0	cerSim1,loxAfr3,triMan1,dasNov3,hetGla2	#N/A	#N/A
CCL19	7	2	2	odoRosDi,susScr3,cerSim1,loxAfr3,triMan1,dasNov3,hetGla2	susScr3,cerSim1	susScr3,cerSim1
CCL28	4	0	0	susScr3,cerSim1,triMan1,hetGla2	#N/A	#N/A
C3orf30	7	0	0	odoRosDi,orcOrc1,turTru2,cerSim1,dasNov3,hetGla2,hg19	#N/A	#N/A
CDH18	5	0	0	turTru2,susScr3,cerSim1,loxAfr3,triMan1	#N/A	#N/A
CCM2	7	1	1	odoRosDi,turTru2,loxAfr3,triMan1,dasNov3,hetGla2,hg19	turTru2	turTru2
CD72	5	0	0	orcOrc1,turTru2,loxAfr3,hetGla2,hg19	#N/A	#N/A
CDH4	8	0	0	odoRosDi,orcOrc1,turTru2,susScr3,loxAfr3,dasNov3,hetGla2,hg19	#N/A	#N/A
CCND3	7	0	0	turTru2,susScr3,cerSim1,loxAfr3,triMan1,dasNov3,hg19	#N/A	#N/A
BC043554	4	0	1	odoRosDi,orcOrc1,triMan1,hg19	#N/A	hg19
CDKAL1	4	0	0	odoRosDi,susScr3,cerSim1,dasNov3	#N/A	#N/A
CD86	3	0	0	orcOrc1,hetGla2,hg19	#N/A	#N/A
CDAN1	5	0	0	odoRosDi,cerSim1,loxAfr3,triMan1,hetGla2	#N/A	#N/A
CDC25B	9	0	0	odoRosDi,orcOrc1,turTru2,susScr3,cerSim1,loxAfr3,triMan1,hetGla2,hg19	#N/A	#N/A
CDHR5	6	0	0	odoRosDi,orcOrc1,turTru2,cerSim1,triMan1,hetGla2	#N/A	#N/A
CDK17	1	0	0	hetGla2	#N/A	#N/A
CDC42BPG	7	0	0	orcOrc1,turTru2,susScr3,cerSim1,triMan1,dasNov3,hg19	#N/A	#N/A
CDK5	#N/A	#N/A	#N/A	#N/A	#N/A	#N/A
CDKN2AIP	4	0	0	odoRosDi,susScr3,cerSim1,hetGla2	#N/A	#N/A
CENPI	8	0	0	odoRosDi,susScr3,cerSim1,loxAfr3,triMan1,dasNov3,hetGla2,hg19	#N/A	#N/A
CCNJL	5	0	0	odoRosDi,cerSim1,triMan1,hetGla2,hg19	#N/A	#N/A
CCP110	6	0	0	odoRosDi,turTru2,triMan1,dasNov3,hetGla2,hg19	#N/A	#N/A
CENPV	2	0	1	odoRosDi,triMan1	#N/A	odoRosDi
CCR8	6	0	0	odoRosDi,orcOrc1,turTru2,susScr3,loxAfr3,hetGla2	#N/A	#N/A
CCT3	6	0	0	odoRosDi,turTru2,susScr3,loxAfr3,triMan1,hetGla2	#N/A	#N/A
CDR1	4	0	0	odoRosDi,orcOrc1,triMan1,hg19	#N/A	#N/A
CDX2	9	1	2	odoRosDi,orcOrc1,turTru2,susScr3,cerSim1,loxAfr3,triMan1,dasNov3,hetGla2	turTru2	turTru2,loxAfr3
CEP170P1	4	0	1	susScr3,loxAfr3,triMan1,hg19	#N/A	hg19
AMN1	6	0	1	odoRosDi,loxAfr3,triMan1,dasNov3,hetGla2,hg19	#N/A	hetGla2
CEACAM3	2	0	0	cerSim1,hetGla2	#N/A	#N/A
CEBPG	4	0	1	odoRosDi,susScr3,cerSim1,triMan1	#N/A	susScr3
CELF1	1	0	0	hetGla2	#N/A	#N/A
CELSR3	6	0	0	turTru2,cerSim1,triMan1,dasNov3,hetGla2,hg19	#N/A	#N/A
CEP57	7	0	0	odoRosDi,orcOrc1,susScr3,cerSim1,loxAfr3,triMan1,hetGla2	#N/A	#N/A
CEP95	7	0	0	turTru2,cerSim1,loxAfr3,triMan1,dasNov3,hetGla2,hg19	#N/A	#N/A
CERS4	5	0	0	turTru2,susScr3,dasNov3,hetGla2,hg19	#N/A	#N/A
CETN2	4	0	0	cerSim1,loxAfr3,triMan1,hetGla2	#N/A	#N/A
CHRNA6	5	0	0	odoRosDi,orcOrc1,susScr3,cerSim1,hetGla2	#N/A	#N/A
CFHR3	4	0	0	loxAfr3,triMan1,hetGla2,hg19	#N/A	#N/A
CD101	6	0	0	odoRosDi,orcOrc1,loxAfr3,triMan1,dasNov3,hetGla2	#N/A	#N/A
CD180	9	0	0	odoRosDi,turTru2,susScr3,cerSim1,loxAfr3,triMan1,dasNov3,hetGla2,hg19	#N/A	#N/A
CIDEB	7	0	0	odoRosDi,turTru2,susScr3,loxAfr3,dasNov3,hetGla2,hg19	#N/A	#N/A
CGB2	6	0	0	susScr3,cerSim1,loxAfr3,triMan1,dasNov3,hetGla2	#N/A	#N/A
C22orf26	1	0	0	hetGla2	#N/A	#N/A
CHST10	7	1	1	odoRosDi,susScr3,cerSim1,loxAfr3,triMan1,dasNov3,hetGla2	dasNov3	dasNov3
CISD1	4	0	0	cerSim1,triMan1,dasNov3,hetGla2	#N/A	#N/A
CKAP2	5	0	0	odoRosDi,orcOrc1,turTru2,triMan1,hg19	#N/A	#N/A
CHAC1	3	0	0	odoRosDi,triMan1,hetGla2	#N/A	#N/A
CHST5	6	0	0	cerSim1,loxAfr3,triMan1,dasNov3,hetGla2,hg19	#N/A	#N/A
CHUK	5	0	0	odoRosDi,cerSim1,loxAfr3,dasNov3,hg19	#N/A	#N/A
AX746670	6	0	0	odoRosDi,turTru2,cerSim1,triMan1,dasNov3,hetGla2	#N/A	#N/A
CHCHD2	5	0	0	odoRosDi,susScr3,triMan1,dasNov3,hetGla2	#N/A	#N/A
CLASP1	5	0	0	odoRosDi,susScr3,cerSim1,triMan1,dasNov3	#N/A	#N/A
CHD4	5	0	0	orcOrc1,turTru2,loxAfr3,hetGla2,hg19	#N/A	#N/A
CHERP	5	0	0	odoRosDi,susScr3,cerSim1,loxAfr3,hetGla2	#N/A	#N/A
CHIT1	5	0	0	orcOrc1,turTru2,cerSim1,triMan1,hg19	#N/A	#N/A
CLDND1	4	0	0	odoRosDi,susScr3,cerSim1,loxAfr3	#N/A	#N/A
CHMP4C	5	0	0	odoRosDi,susScr3,loxAfr3,hetGla2,hg19	#N/A	#N/A
CHP2	3	0	0	orcOrc1,loxAfr3,dasNov3	#N/A	#N/A
CHRM2	5	0	0	turTru2,loxAfr3,triMan1,dasNov3,hetGla2	#N/A	#N/A
ATP5A1	3	0	0	orcOrc1,triMan1,hetGla2	#N/A	#N/A
CLEC4A	2	0	0	odoRosDi,cerSim1	#N/A	#N/A
CLEC18B	4	0	0	susScr3,dasNov3,hetGla2,hg19	#N/A	#N/A
CLCN3	5	1	3	odoRosDi,susScr3,cerSim1,loxAfr3,triMan1	triMan1	susScr3,loxAfr3,triMan1
ANKRD11	5	0	0	odoRosDi,turTru2,triMan1,dasNov3,hg19	#N/A	#N/A
ALG5	5	0	0	odoRosDi,susScr3,loxAfr3,triMan1,hetGla2	#N/A	#N/A
CLEC9A	6	0	0	orcOrc1,turTru2,susScr3,triMan1,dasNov3,hetGla2	#N/A	#N/A
CLINT1	2	0	0	dasNov3,hetGla2	#N/A	#N/A
CLLU1	2	0	0	dasNov3,hetGla2	#N/A	#N/A
CLP1	1	0	0	triMan1	#N/A	#N/A
CLRN2	7	0	0	odoRosDi,susScr3,cerSim1,loxAfr3,dasNov3,hetGla2,hg19	#N/A	#N/A
CLDN14	4	0	0	odoRosDi,cerSim1,dasNov3,hetGla2	#N/A	#N/A
CLDN24	6	0	1	odoRosDi,cerSim1,loxAfr3,triMan1,dasNov3,hetGla2	#N/A	dasNov3
CLUAP1	7	0	0	odoRosDi,turTru2,susScr3,loxAfr3,triMan1,dasNov3,hetGla2	#N/A	#N/A
CMBL	5	0	0	odoRosDi,turTru2,cerSim1,dasNov3,hetGla2	#N/A	#N/A
CMTM2	6	0	0	odoRosDi,turTru2,cerSim1,loxAfr3,hetGla2,hg19	#N/A	#N/A
CNBP	#N/A	#N/A	#N/A	#N/A	#N/A	#N/A
AIPL1	4	0	0	odoRosDi,loxAfr3,dasNov3,hetGla2	#N/A	#N/A
CNGB3	8	0	0	orcOrc1,turTru2,susScr3,loxAfr3,triMan1,dasNov3,hetGla2,hg19	#N/A	#N/A
CNNM1	7	0	3	odoRosDi,turTru2,loxAfr3,triMan1,dasNov3,hetGla2,hg19	#N/A	turTru2,loxAfr3,triMan1
CNOT6L	1	0	1	susScr3	#N/A	susScr3
CNR1	5	0	0	odoRosDi,susScr3,cerSim1,dasNov3,hetGla2	#N/A	#N/A
ADHFE1	7	1	1	odoRosDi,orcOrc1,susScr3,cerSim1,loxAfr3,hetGla2,hg19	hg19	hg19
CNTN2	6	0	0	cerSim1,loxAfr3,triMan1,dasNov3,hetGla2,hg19	#N/A	#N/A
CNTNAP5	3	0	0	orcOrc1,susScr3,dasNov3	#N/A	#N/A
C22orf29	6	0	0	orcOrc1,turTru2,susScr3,loxAfr3,triMan1,hetGla2	#N/A	#N/A
COBL	8	0	0	turTru2,susScr3,cerSim1,loxAfr3,triMan1,dasNov3,hetGla2,hg19	#N/A	#N/A
COIL	6	0	0	turTru2,susScr3,loxAfr3,triMan1,dasNov3,hetGla2	#N/A	#N/A
AK055980	3	0	0	orcOrc1,cerSim1,hetGla2	#N/A	#N/A
CALM3	#N/A	#N/A	#N/A	#N/A	#N/A	#N/A
COL18A1	6	0	0	odoRosDi,turTru2,susScr3,cerSim1,hetGla2,hg19	#N/A	#N/A
COL26A1	7	0	0	turTru2,susScr3,cerSim1,loxAfr3,triMan1,dasNov3,hetGla2	#N/A	#N/A
COL4A5	9	0	0	odoRosDi,turTru2,susScr3,cerSim1,loxAfr3,triMan1,dasNov3,hetGla2,hg19	#N/A	#N/A
COL6A6	6	2	2	orcOrc1,turTru2,susScr3,loxAfr3,dasNov3,hetGla2	susScr3,dasNov3	susScr3,dasNov3
CACNG4	3	0	0	loxAfr3,triMan1,dasNov3	#N/A	#N/A
ATP5I	4	0	0	cerSim1,loxAfr3,triMan1,hetGla2	#N/A	#N/A
COLGALT1	3	0	1	orcOrc1,loxAfr3,hetGla2	#N/A	hetGla2
COMMD7	5	0	0	susScr3,loxAfr3,triMan1,dasNov3,hetGla2	#N/A	#N/A
COPG1	6	0	0	odoRosDi,turTru2,cerSim1,loxAfr3,triMan1,dasNov3	#N/A	#N/A
COPS8	4	0	0	odoRosDi,susScr3,dasNov3,hetGla2	#N/A	#N/A
COQ7	7	0	0	odoRosDi,orcOrc1,turTru2,loxAfr3,triMan1,dasNov3,hg19	#N/A	#N/A
COTL1	4	0	0	orcOrc1,turTru2,loxAfr3,hetGla2	#N/A	#N/A
COX4I2	5	0	0	odoRosDi,orcOrc1,cerSim1,dasNov3,hetGla2	#N/A	#N/A
COX7A2	5	0	1	susScr3,cerSim1,triMan1,dasNov3,hetGla2	#N/A	cerSim1
CPA5	8	0	0	odoRosDi,orcOrc1,turTru2,susScr3,loxAfr3,triMan1,dasNov3,hetGla2	#N/A	#N/A
CPED1	8	0	0	odoRosDi,turTru2,cerSim1,loxAfr3,triMan1,dasNov3,hetGla2,hg19	#N/A	#N/A
CPNE2	8	0	0	orcOrc1,turTru2,cerSim1,loxAfr3,triMan1,dasNov3,hetGla2,hg19	#N/A	#N/A
CPPED1	6	0	0	odoRosDi,orcOrc1,turTru2,susScr3,hetGla2,hg19	#N/A	#N/A
ASAH2	6	0	0	turTru2,susScr3,loxAfr3,triMan1,dasNov3,hg19	#N/A	#N/A
CLMN	7	0	0	odoRosDi,orcOrc1,turTru2,susScr3,loxAfr3,hetGla2,hg19	#N/A	#N/A
CBLB	7	0	0	odoRosDi,susScr3,cerSim1,loxAfr3,triMan1,dasNov3,hetGla2	#N/A	#N/A
ASS1	8	0	2	orcOrc1,susScr3,cerSim1,loxAfr3,triMan1,dasNov3,hetGla2,hg19	#N/A	cerSim1,triMan1
A1CF	7	0	0	odoRosDi,orcOrc1,turTru2,susScr3,cerSim1,triMan1,hg19	#N/A	#N/A
CENPW	4	0	0	cerSim1,triMan1,dasNov3,hetGla2	#N/A	#N/A
C21orf33	7	0	0	odoRosDi,susScr3,cerSim1,loxAfr3,triMan1,dasNov3,hg19	#N/A	#N/A
API5	3	0	0	cerSim1,loxAfr3,hetGla2	#N/A	#N/A
ASF1A	1	0	0	susScr3	#N/A	#N/A
ATL2	5	0	0	susScr3,triMan1,dasNov3,hetGla2,hg19	#N/A	#N/A
CS	7	0	0	orcOrc1,cerSim1,loxAfr3,triMan1,dasNov3,hetGla2,hg19	#N/A	#N/A
AB429224	4	0	0	turTru2,susScr3,loxAfr3,hetGla2	#N/A	#N/A
ACHE	5	0	0	odoRosDi,orcOrc1,triMan1,dasNov3,hetGla2	#N/A	#N/A
CST1	3	0	0	susScr3,cerSim1,hg19	#N/A	#N/A
CTH	6	0	0	odoRosDi,turTru2,susScr3,cerSim1,loxAfr3,hetGla2	#N/A	#N/A
CSTA	8	0	0	odoRosDi,orcOrc1,turTru2,susScr3,cerSim1,loxAfr3,triMan1,dasNov3	#N/A	#N/A
CTNNBL1	3	0	0	loxAfr3,triMan1,dasNov3	#N/A	#N/A
CT45A5	6	0	0	susScr3,cerSim1,loxAfr3,triMan1,hetGla2,hg19	#N/A	#N/A
CTCFL	8	0	0	odoRosDi,orcOrc1,turTru2,cerSim1,triMan1,dasNov3,hetGla2,hg19	#N/A	#N/A
CTRL	4	0	1	odoRosDi,orcOrc1,loxAfr3,triMan1	#N/A	triMan1
ARFRP1	2	0	0	triMan1,dasNov3	#N/A	#N/A
C1QTNF3	3	0	0	triMan1,hetGla2,hg19	#N/A	#N/A
GID4	3	0	0	cerSim1,loxAfr3,triMan1	#N/A	#N/A
CPSF6	0	0	0	#N/A	#N/A	#N/A
AP2A1	2	0	0	susScr3,dasNov3	#N/A	#N/A
CALCB	5	0	0	odoRosDi,susScr3,loxAfr3,dasNov3,hetGla2	#N/A	#N/A
C9orf43	9	0	0	odoRosDi,orcOrc1,turTru2,susScr3,cerSim1,loxAfr3,triMan1,hetGla2,hg19	#N/A	#N/A
ANK1	8	1	1	orcOrc1,turTru2,susScr3,cerSim1,loxAfr3,triMan1,dasNov3,hg19	triMan1	triMan1
ASB9	4	0	0	turTru2,susScr3,triMan1,dasNov3	#N/A	#N/A
AK056081	1	0	0	hg19	#N/A	#N/A
ATP5J2-PTCD1	9	0	0	odoRosDi,orcOrc1,turTru2,susScr3,cerSim1,loxAfr3,triMan1,hetGla2,hg19	#N/A	#N/A
FBXO25	4	0	0	susScr3,loxAfr3,dasNov3,hg19	#N/A	#N/A
ATP6V0A1	4	0	0	orcOrc1,cerSim1,loxAfr3,hetGla2	#N/A	#N/A
FBXO38	5	0	1	susScr3,cerSim1,triMan1,dasNov3,hg19	#N/A	susScr3
FBXO47	4	0	0	loxAfr3,triMan1,dasNov3,hetGla2	#N/A	#N/A
FBXW12	1	0	0	odoRosDi	#N/A	#N/A
FER1L6	10	0	0	odoRosDi,orcOrc1,turTru2,susScr3,cerSim1,loxAfr3,triMan1,dasNov3,hetGla2,hg19	#N/A	#N/A
FCER1G	6	0	0	susScr3,cerSim1,loxAfr3,triMan1,dasNov3,hetGla2	#N/A	#N/A
FEZ2	7	0	0	odoRosDi,susScr3,loxAfr3,triMan1,dasNov3,hetGla2,hg19	#N/A	#N/A
FCGRT	5	0	0	odoRosDi,orcOrc1,turTru2,susScr3,hetGla2	#N/A	#N/A
FCRL3	7	0	0	turTru2,susScr3,loxAfr3,triMan1,dasNov3,hetGla2,hg19	#N/A	#N/A
CCDC85C	1	1	1	turTru2	turTru2	turTru2
FGD2	6	0	0	odoRosDi,turTru2,susScr3,triMan1,dasNov3,hg19	#N/A	#N/A
FGF16	1	0	0	hetGla2	#N/A	#N/A
FDX1	4	0	1	susScr3,loxAfr3,triMan1,dasNov3	#N/A	susScr3
ARF5	#N/A	#N/A	#N/A	#N/A	#N/A	#N/A
FGF3	2	0	0	turTru2,hetGla2	#N/A	#N/A
FGFR1OP2	5	0	0	susScr3,cerSim1,loxAfr3,dasNov3,hetGla2	#N/A	#N/A
FGL2	5	0	0	odoRosDi,loxAfr3,triMan1,dasNov3,hg19	#N/A	#N/A
FHOD3	8	0	0	odoRosDi,turTru2,susScr3,cerSim1,loxAfr3,triMan1,dasNov3,hg19	#N/A	#N/A
ACTR3C	4	0	0	susScr3,cerSim1,triMan1,hetGla2	#N/A	#N/A
CCDC127	6	0	0	turTru2,cerSim1,loxAfr3,triMan1,dasNov3,hetGla2	#N/A	#N/A
CCDC59	8	0	0	odoRosDi,orcOrc1,susScr3,cerSim1,loxAfr3,dasNov3,hetGla2,hg19	#N/A	#N/A
CNDP1	8	0	0	orcOrc1,turTru2,susScr3,cerSim1,loxAfr3,triMan1,hetGla2,hg19	#N/A	#N/A
AK056228	4	0	0	turTru2,cerSim1,triMan1,hg19	#N/A	#N/A
ALPP	4	0	0	odoRosDi,loxAfr3,hetGla2,hg19	#N/A	#N/A
ARL10	5	0	0	odoRosDi,susScr3,cerSim1,triMan1,hetGla2	#N/A	#N/A
FIGNL2	2	0	0	odoRosDi,susScr3	#N/A	#N/A
C15orf38-AP3S2	6	0	0	susScr3,cerSim1,loxAfr3,triMan1,dasNov3,hg19	#N/A	#N/A
ALKBH8	8	0	0	odoRosDi,orcOrc1,turTru2,cerSim1,triMan1,dasNov3,hetGla2,hg19	#N/A	#N/A
CALY	5	0	0	odoRosDi,turTru2,cerSim1,triMan1,hg19	#N/A	#N/A
AIF1	4	0	0	susScr3,loxAfr3,triMan1,hetGla2	#N/A	#N/A
AGPS	5	0	0	odoRosDi,cerSim1,triMan1,dasNov3,hg19	#N/A	#N/A
C1orf127	7	0	1	odoRosDi,turTru2,susScr3,loxAfr3,triMan1,hetGla2,hg19	#N/A	susScr3
ATG4B	2	0	0	odoRosDi,cerSim1	#N/A	#N/A
CALML3	4	0	1	odoRosDi,cerSim1,triMan1,dasNov3	#N/A	triMan1
CST2	0	0	0	#N/A	#N/A	#N/A
C17orf112	4	0	0	odoRosDi,cerSim1,hetGla2,hg19	#N/A	#N/A
ABAT	6	0	3	odoRosDi,cerSim1,triMan1,dasNov3,hetGla2,hg19	#N/A	dasNov3,hetGla2,hg19
CBR4	8	0	0	odoRosDi,turTru2,susScr3,cerSim1,loxAfr3,triMan1,hetGla2,hg19	#N/A	#N/A
CCL1	5	0	0	orcOrc1,cerSim1,loxAfr3,triMan1,hg19	#N/A	#N/A
AGO4	4	0	0	cerSim1,loxAfr3,triMan1,dasNov3	#N/A	#N/A
CASP1	5	0	0	orcOrc1,turTru2,cerSim1,triMan1,hg19	#N/A	#N/A
ASPDH	4	0	0	susScr3,dasNov3,hetGla2,hg19	#N/A	#N/A
ACADVL	7	0	0	odoRosDi,susScr3,cerSim1,loxAfr3,triMan1,dasNov3,hg19	#N/A	#N/A
AADACL4	5	0	0	orcOrc1,cerSim1,dasNov3,hetGla2,hg19	#N/A	#N/A
ACAA2	4	0	0	orcOrc1,susScr3,cerSim1,dasNov3	#N/A	#N/A
CCDC86	5	0	0	turTru2,cerSim1,triMan1,dasNov3,hetGla2	#N/A	#N/A
ASF1B	4	0	0	susScr3,loxAfr3,triMan1,dasNov3	#N/A	#N/A
CST3	3	0	1	cerSim1,triMan1,dasNov3	#N/A	triMan1
CCDC30	10	0	2	odoRosDi,orcOrc1,turTru2,susScr3,cerSim1,loxAfr3,triMan1,dasNov3,hetGla2,hg19	#N/A	susScr3,triMan1
COX10	3	0	0	odoRosDi,susScr3,dasNov3	#N/A	#N/A
ACTR3	1	0	0	hetGla2	#N/A	#N/A
BOLA2	4	0	0	triMan1,dasNov3,hetGla2,hg19	#N/A	#N/A
COPZ1	4	0	0	triMan1,dasNov3,hetGla2,hg19	#N/A	#N/A
ANXA4	7	0	0	odoRosDi,susScr3,cerSim1,loxAfr3,triMan1,dasNov3,hg19	#N/A	#N/A
ABLIM3	7	1	1	odoRosDi,orcOrc1,turTru2,susScr3,cerSim1,triMan1,hg19	susScr3	susScr3
ACSM2A	5	0	0	odoRosDi,cerSim1,loxAfr3,triMan1,hg19	#N/A	#N/A
CAPZA2	3	0	0	cerSim1,triMan1,dasNov3	#N/A	#N/A
AMBN	6	0	0	orcOrc1,susScr3,cerSim1,dasNov3,hetGla2,hg19	#N/A	#N/A
AGFG1	4	0	0	odoRosDi,susScr3,loxAfr3,hg19	#N/A	#N/A
ACTL8	6	0	0	odoRosDi,cerSim1,loxAfr3,triMan1,dasNov3,hetGla2	#N/A	#N/A
COX5A	4	0	0	odoRosDi,susScr3,loxAfr3,hg19	#N/A	#N/A
AK056253	3	0	0	susScr3,cerSim1,hg19	#N/A	#N/A
ACBD6	6	0	0	odoRosDi,susScr3,cerSim1,loxAfr3,dasNov3,hetGla2	#N/A	#N/A
CLDN15	8	0	0	odoRosDi,susScr3,cerSim1,loxAfr3,triMan1,dasNov3,hetGla2,hg19	#N/A	#N/A
COMMD8	6	0	0	orcOrc1,susScr3,cerSim1,triMan1,dasNov3,hetGla2	#N/A	#N/A
C14orf28	2	0	0	cerSim1,hg19	#N/A	#N/A
BMP8B	4	0	0	susScr3,loxAfr3,hetGla2,hg19	#N/A	#N/A
ARF6	#N/A	#N/A	#N/A	#N/A	#N/A	#N/A
ADPRH	7	0	0	odoRosDi,turTru2,susScr3,cerSim1,loxAfr3,triMan1,hg19	#N/A	#N/A
ANKRD42	5	0	0	susScr3,cerSim1,loxAfr3,dasNov3,hetGla2	#N/A	#N/A
C15orf56	1	0	0	dasNov3	#N/A	#N/A
BNIP2	5	0	0	odoRosDi,cerSim1,loxAfr3,triMan1,dasNov3	#N/A	#N/A
ACTB	0	0	0	#N/A	#N/A	#N/A
CT45A6	1	0	0	hetGla2	#N/A	#N/A
COX7B2	6	0	0	odoRosDi,cerSim1,loxAfr3,triMan1,dasNov3,hetGla2	#N/A	#N/A
CALCOCO1	7	0	0	odoRosDi,orcOrc1,cerSim1,loxAfr3,triMan1,hetGla2,hg19	#N/A	#N/A
C12orf73	4	0	0	odoRosDi,cerSim1,triMan1,hetGla2	#N/A	#N/A
ADRB3	7	0	0	odoRosDi,orcOrc1,turTru2,susScr3,cerSim1,dasNov3,hg19	#N/A	#N/A
CAMK1D	4	0	1	loxAfr3,triMan1,dasNov3,hetGla2	#N/A	dasNov3
CCL2	4	0	0	odoRosDi,cerSim1,loxAfr3,triMan1	#N/A	#N/A
ALG6	7	0	0	odoRosDi,orcOrc1,susScr3,triMan1,dasNov3,hetGla2,hg19	#N/A	#N/A
ARG1	4	0	0	susScr3,loxAfr3,triMan1,hetGla2	#N/A	#N/A
APPBP2	1	0	0	cerSim1	#N/A	#N/A
COQ9	6	0	0	odoRosDi,orcOrc1,susScr3,cerSim1,loxAfr3,triMan1	#N/A	#N/A
CMC1	4	0	0	cerSim1,loxAfr3,dasNov3,hetGla2	#N/A	#N/A
AK056490	2	0	0	orcOrc1,turTru2	#N/A	#N/A
CNR2	7	0	0	orcOrc1,cerSim1,loxAfr3,triMan1,dasNov3,hetGla2,hg19	#N/A	#N/A
ANPEP	7	0	0	odoRosDi,orcOrc1,turTru2,cerSim1,loxAfr3,triMan1,hg19	#N/A	#N/A
CA12	8	0	1	odoRosDi,turTru2,cerSim1,loxAfr3,triMan1,dasNov3,hetGla2,hg19	#N/A	triMan1
AIFM1	6	0	0	odoRosDi,turTru2,cerSim1,loxAfr3,dasNov3,hetGla2	#N/A	#N/A
ABCG5	6	0	0	odoRosDi,turTru2,cerSim1,loxAfr3,triMan1,hetGla2	#N/A	#N/A
BOLA3	6	0	0	odoRosDi,susScr3,cerSim1,triMan1,dasNov3,hetGla2	#N/A	#N/A
CMTM3	6	0	1	odoRosDi,orcOrc1,turTru2,loxAfr3,dasNov3,hetGla2	#N/A	turTru2
BPIFB1	8	0	0	odoRosDi,turTru2,susScr3,cerSim1,triMan1,dasNov3,hetGla2,hg19	#N/A	#N/A
AK057304	0	0	0	#N/A	#N/A	#N/A
FBXO27	6	0	2	odoRosDi,orcOrc1,turTru2,susScr3,dasNov3,hetGla2	#N/A	turTru2,dasNov3
ATG10	5	0	0	cerSim1,loxAfr3,triMan1,hetGla2,hg19	#N/A	#N/A
AK074396	6	0	0	odoRosDi,turTru2,cerSim1,dasNov3,hetGla2,hg19	#N/A	#N/A
CCL20	4	0	0	odoRosDi,susScr3,cerSim1,triMan1	#N/A	#N/A
CBX5	1	0	0	dasNov3	#N/A	#N/A
C15orf57	6	0	0	odoRosDi,turTru2,cerSim1,loxAfr3,triMan1,dasNov3	#N/A	#N/A
ARFGAP1	5	0	0	turTru2,triMan1,dasNov3,hetGla2,hg19	#N/A	#N/A
ART3	6	0	0	orcOrc1,susScr3,loxAfr3,triMan1,dasNov3,hetGla2	#N/A	#N/A
CSTB	2	0	0	cerSim1,triMan1	#N/A	#N/A
ARHGAP17	4	0	0	loxAfr3,dasNov3,hetGla2,hg19	#N/A	#N/A
CALML4	8	0	0	odoRosDi,turTru2,susScr3,cerSim1,loxAfr3,dasNov3,hetGla2,hg19	#N/A	#N/A
ATF1	1	0	0	dasNov3	#N/A	#N/A
COPZ2	3	0	0	susScr3,dasNov3,hetGla2	#N/A	#N/A
C11orf57	3	0	1	loxAfr3,hetGla2,hg19	#N/A	hg19
AQP3	4	0	0	odoRosDi,turTru2,triMan1,dasNov3	#N/A	#N/A
CCAR1	5	0	0	turTru2,cerSim1,loxAfr3,triMan1,dasNov3	#N/A	#N/A
CT62	4	0	0	odoRosDi,susScr3,triMan1,hetGla2	#N/A	#N/A
C17orf47	9	0	0	odoRosDi,turTru2,susScr3,cerSim1,loxAfr3,triMan1,dasNov3,hetGla2,hg19	#N/A	#N/A
ADCY3	7	0	0	odoRosDi,susScr3,cerSim1,triMan1,dasNov3,hetGla2,hg19	#N/A	#N/A
ATG4C	6	0	0	odoRosDi,cerSim1,loxAfr3,triMan1,dasNov3,hetGla2	#N/A	#N/A
C11orf80	5	0	0	odoRosDi,orcOrc1,triMan1,dasNov3,hg19	#N/A	#N/A
C12orf74	9	0	0	odoRosDi,orcOrc1,susScr3,cerSim1,loxAfr3,triMan1,dasNov3,hetGla2,hg19	#N/A	#N/A
ACVR1C	6	0	0	orcOrc1,cerSim1,loxAfr3,triMan1,dasNov3,hetGla2	#N/A	#N/A
ANGPT2	6	0	1	odoRosDi,cerSim1,loxAfr3,triMan1,hetGla2,hg19	#N/A	loxAfr3
ABHD8	4	0	0	odoRosDi,loxAfr3,triMan1,hetGla2	#N/A	#N/A
AMN	2	0	0	susScr3,hg19	#N/A	#N/A
CADM2	3	0	0	odoRosDi,triMan1,hetGla2	#N/A	#N/A
CCDC129	9	1	2	odoRosDi,orcOrc1,turTru2,cerSim1,loxAfr3,triMan1,dasNov3,hetGla2,hg19	orcOrc1	orcOrc1,hg19
AMTN	7	0	1	turTru2,susScr3,cerSim1,loxAfr3,dasNov3,hetGla2,hg19	#N/A	dasNov3
C9orf84	9	1	1	odoRosDi,orcOrc1,turTru2,susScr3,cerSim1,triMan1,dasNov3,hetGla2,hg19	triMan1	triMan1
ARL11	6	0	0	odoRosDi,susScr3,cerSim1,triMan1,dasNov3,hg19	#N/A	#N/A
ASGR1	7	0	0	odoRosDi,susScr3,cerSim1,triMan1,dasNov3,hetGla2,hg19	#N/A	#N/A
C16orf95	5	0	0	cerSim1,triMan1,dasNov3,hetGla2,hg19	#N/A	#N/A
CCT4	4	0	0	cerSim1,triMan1,dasNov3,hetGla2	#N/A	#N/A
CCDC105	6	0	0	turTru2,susScr3,cerSim1,loxAfr3,triMan1,hetGla2	#N/A	#N/A
ARNTL	6	0	0	odoRosDi,turTru2,loxAfr3,triMan1,dasNov3,hetGla2	#N/A	#N/A
C10orf114	4	0	0	susScr3,cerSim1,loxAfr3,triMan1	#N/A	#N/A
ADD2	5	0	0	odoRosDi,cerSim1,triMan1,dasNov3,hetGla2	#N/A	#N/A
CNOT6	4	0	0	susScr3,cerSim1,triMan1,hetGla2	#N/A	#N/A
CLDN25	5	0	0	odoRosDi,turTru2,susScr3,dasNov3,hetGla2	#N/A	#N/A
BOLL	5	0	1	odoRosDi,loxAfr3,triMan1,dasNov3,hetGla2	#N/A	hetGla2
CPSF7	6	0	0	odoRosDi,cerSim1,triMan1,dasNov3,hetGla2,hg19	#N/A	#N/A
CA6	3	0	0	orcOrc1,cerSim1,dasNov3	#N/A	#N/A
CP	8	0	0	odoRosDi,orcOrc1,cerSim1,loxAfr3,triMan1,dasNov3,hetGla2,hg19	#N/A	#N/A
BMPER	8	1	1	odoRosDi,orcOrc1,susScr3,cerSim1,loxAfr3,triMan1,hetGla2,hg19	hetGla2	hetGla2
CD2AP	7	0	0	odoRosDi,susScr3,cerSim1,triMan1,dasNov3,hetGla2,hg19	#N/A	#N/A
C11orf94	5	0	0	orcOrc1,cerSim1,loxAfr3,triMan1,hetGla2	#N/A	#N/A
CSTF1	0	0	0	#N/A	#N/A	#N/A
COX7B	6	0	0	turTru2,cerSim1,loxAfr3,triMan1,dasNov3,hg19	#N/A	#N/A
BMP15	5	0	0	turTru2,susScr3,cerSim1,hetGla2,hg19	#N/A	#N/A
ANKRD1	8	0	0	odoRosDi,susScr3,cerSim1,loxAfr3,triMan1,dasNov3,hetGla2,hg19	#N/A	#N/A
CTNND1	5	0	1	susScr3,cerSim1,triMan1,dasNov3,hetGla2	#N/A	hetGla2
CASQ1	7	0	0	odoRosDi,orcOrc1,susScr3,cerSim1,loxAfr3,triMan1,hg19	#N/A	#N/A
CARHSP1	5	0	0	orcOrc1,susScr3,cerSim1,loxAfr3,dasNov3	#N/A	#N/A
CD209	3	0	0	loxAfr3,dasNov3,hg19	#N/A	#N/A
BUB1B	8	0	0	orcOrc1,turTru2,susScr3,cerSim1,loxAfr3,triMan1,dasNov3,hetGla2	#N/A	#N/A
CCNDBP1	6	0	0	odoRosDi,orcOrc1,loxAfr3,triMan1,hetGla2,hg19	#N/A	#N/A
CCL3L1	3	1	1	susScr3,cerSim1,hg19	cerSim1	cerSim1
COX5B	8	0	0	odoRosDi,orcOrc1,cerSim1,loxAfr3,triMan1,dasNov3,hetGla2,hg19	#N/A	#N/A
BC043578	4	1	1	odoRosDi,loxAfr3,triMan1,dasNov3	triMan1	triMan1
BC033961	3	0	0	odoRosDi,dasNov3,hetGla2	#N/A	#N/A
BC016978	8	0	0	odoRosDi,turTru2,cerSim1,loxAfr3,triMan1,dasNov3,hetGla2,hg19	#N/A	#N/A
CCDC14	7	0	0	odoRosDi,turTru2,susScr3,triMan1,dasNov3,hetGla2,hg19	#N/A	#N/A
CBX6	3	0	0	odoRosDi,turTru2,cerSim1	#N/A	#N/A
ATP5B	8	0	1	orcOrc1,susScr3,cerSim1,loxAfr3,triMan1,dasNov3,hetGla2,hg19	#N/A	hg19
CAPN11	6	0	0	odoRosDi,turTru2,loxAfr3,triMan1,dasNov3,hetGla2	#N/A	#N/A
ASIC4	6	0	0	turTru2,loxAfr3,triMan1,dasNov3,hetGla2,hg19	#N/A	#N/A
ACTR5	10	1	3	odoRosDi,orcOrc1,turTru2,susScr3,cerSim1,loxAfr3,triMan1,dasNov3,hetGla2,hg19	turTru2	turTru2,cerSim1,loxAfr3
CCKBR	6	0	0	turTru2,cerSim1,loxAfr3,triMan1,hetGla2,hg19	#N/A	#N/A
BBS10	7	0	0	odoRosDi,orcOrc1,turTru2,triMan1,dasNov3,hetGla2,hg19	#N/A	#N/A
CMC2	3	0	0	odoRosDi,triMan1,hetGla2	#N/A	#N/A
C15orf59	2	0	0	cerSim1,dasNov3	#N/A	#N/A
AIP	4	0	0	odoRosDi,cerSim1,triMan1,hg19	#N/A	#N/A
CLUH	5	0	0	susScr3,cerSim1,dasNov3,hetGla2,hg19	#N/A	#N/A
CCL3	6	0	0	odoRosDi,orcOrc1,turTru2,cerSim1,triMan1,hg19	#N/A	#N/A
CTSL1	3	0	0	turTru2,cerSim1,loxAfr3	#N/A	#N/A
AK311291	6	1	1	odoRosDi,turTru2,susScr3,cerSim1,loxAfr3,triMan1	triMan1	triMan1
CTU1	0	0	0	#N/A	#N/A	#N/A
CUL3	1	0	0	dasNov3	#N/A	#N/A
CWC15	0	0	0	#N/A	#N/A	#N/A
CXCL10	5	0	0	susScr3,cerSim1,loxAfr3,dasNov3,hetGla2	#N/A	#N/A
CYB5B	3	0	0	odoRosDi,susScr3,hetGla2	#N/A	#N/A
CXCL5	3	0	0	triMan1,dasNov3,hetGla2	#N/A	#N/A
CXCR7	5	0	0	orcOrc1,turTru2,susScr3,cerSim1,hetGla2	#N/A	#N/A
CXorf48	1	0	0	hg19	#N/A	#N/A
CXorf66	9	0	0	odoRosDi,orcOrc1,turTru2,susScr3,cerSim1,triMan1,dasNov3,hetGla2,hg19	#N/A	#N/A
CYBRD1	4	0	0	loxAfr3,triMan1,dasNov3,hg19	#N/A	#N/A
AK091593	3	0	0	odoRosDi,cerSim1,dasNov3	#N/A	#N/A
CPZ	3	0	1	cerSim1,dasNov3,hg19	#N/A	dasNov3
CRB2	8	0	0	odoRosDi,susScr3,cerSim1,loxAfr3,triMan1,dasNov3,hetGla2,hg19	#N/A	#N/A
CREB3	6	0	0	odoRosDi,loxAfr3,triMan1,dasNov3,hetGla2,hg19	#N/A	#N/A
CREM	4	0	1	susScr3,cerSim1,triMan1,hetGla2	#N/A	hetGla2
CRISP1	5	0	0	odoRosDi,turTru2,cerSim1,loxAfr3,dasNov3	#N/A	#N/A
CD40LG	5	0	1	susScr3,cerSim1,loxAfr3,triMan1,hetGla2	#N/A	triMan1
CRMP1	6	0	0	odoRosDi,turTru2,cerSim1,loxAfr3,dasNov3,hg19	#N/A	#N/A
CRTC2	7	0	0	odoRosDi,susScr3,cerSim1,loxAfr3,triMan1,hetGla2,hg19	#N/A	#N/A
CSF2RA	0	0	0	#N/A	#N/A	#N/A
ASCC1	9	0	0	odoRosDi,orcOrc1,susScr3,cerSim1,loxAfr3,triMan1,dasNov3,hetGla2,hg19	#N/A	#N/A
CYP4A11	7	0	0	orcOrc1,susScr3,cerSim1,loxAfr3,triMan1,hetGla2,hg19	#N/A	#N/A
CD226	4	0	0	odoRosDi,turTru2,hetGla2,hg19	#N/A	#N/A
CMTM4	5	1	3	odoRosDi,cerSim1,loxAfr3,triMan1,hetGla2	cerSim1	cerSim1,loxAfr3,hetGla2
CSMD1	4	0	0	turTru2,triMan1,hetGla2,hg19	#N/A	#N/A
CRYM	6	0	0	odoRosDi,susScr3,cerSim1,loxAfr3,triMan1,hetGla2	#N/A	#N/A
CYP4V2	6	0	0	odoRosDi,turTru2,susScr3,dasNov3,hetGla2,hg19	#N/A	#N/A
ANKRD34A	5	0	0	odoRosDi,cerSim1,loxAfr3,dasNov3,hetGla2	#N/A	#N/A
CRYBB1	6	0	0	odoRosDi,susScr3,cerSim1,dasNov3,hetGla2,hg19	#N/A	#N/A
CSNK1E	2	0	1	odoRosDi,dasNov3	#N/A	dasNov3
CYSLTR2	9	0	0	odoRosDi,orcOrc1,turTru2,cerSim1,loxAfr3,triMan1,dasNov3,hetGla2,hg19	#N/A	#N/A
CYP11A1	7	0	0	susScr3,cerSim1,loxAfr3,triMan1,dasNov3,hetGla2,hg19	#N/A	#N/A
CYP21A2	7	0	0	odoRosDi,susScr3,cerSim1,loxAfr3,triMan1,dasNov3,hetGla2	#N/A	#N/A
CYP2A7	2	0	1	cerSim1,dasNov3	#N/A	cerSim1
CYP2J2	5	0	0	odoRosDi,susScr3,triMan1,dasNov3,hg19	#N/A	#N/A
COMMD9	7	0	0	odoRosDi,susScr3,cerSim1,loxAfr3,triMan1,dasNov3,hetGla2	#N/A	#N/A
D2HGDH	6	0	0	odoRosDi,orcOrc1,cerSim1,loxAfr3,hetGla2,hg19	#N/A	#N/A
ASTE1	8	0	0	turTru2,susScr3,cerSim1,loxAfr3,triMan1,dasNov3,hetGla2,hg19	#N/A	#N/A
ACTC1	#N/A	#N/A	#N/A	#N/A	#N/A	#N/A
DDX56	2	0	0	turTru2,dasNov3	#N/A	#N/A
DACT3	2	1	1	turTru2,hetGla2	turTru2	turTru2
DEDD2	7	0	0	odoRosDi,susScr3,cerSim1,loxAfr3,triMan1,dasNov3,hetGla2	#N/A	#N/A
DAP3	7	0	0	odoRosDi,turTru2,susScr3,cerSim1,triMan1,hetGla2,hg19	#N/A	#N/A
DAW1	7	0	0	odoRosDi,orcOrc1,turTru2,cerSim1,triMan1,dasNov3,hetGla2	#N/A	#N/A
DBF4B	6	0	0	odoRosDi,orcOrc1,turTru2,triMan1,dasNov3,hg19	#N/A	#N/A
DEFB107A	4	0	1	susScr3,loxAfr3,triMan1,hg19	#N/A	triMan1
DBP	5	0	0	turTru2,susScr3,loxAfr3,dasNov3,hetGla2	#N/A	#N/A
DEFB119	7	0	1	susScr3,cerSim1,loxAfr3,triMan1,dasNov3,hetGla2,hg19	#N/A	triMan1
DEFB132	6	0	0	odoRosDi,turTru2,cerSim1,triMan1,dasNov3,hg19	#N/A	#N/A
DCAF13	8	0	0	odoRosDi,orcOrc1,turTru2,susScr3,cerSim1,dasNov3,hetGla2,hg19	#N/A	#N/A
DEK	6	0	0	odoRosDi,orcOrc1,susScr3,cerSim1,dasNov3,hetGla2	#N/A	#N/A
DCAKD	7	0	0	odoRosDi,orcOrc1,susScr3,cerSim1,triMan1,hetGla2,hg19	#N/A	#N/A
DENND4C	8	0	0	odoRosDi,turTru2,susScr3,cerSim1,loxAfr3,triMan1,hetGla2,hg19	#N/A	#N/A
DCHS2	7	0	0	turTru2,susScr3,cerSim1,triMan1,dasNov3,hetGla2,hg19	#N/A	#N/A
DCP1B	6	0	0	turTru2,susScr3,loxAfr3,triMan1,hetGla2,hg19	#N/A	#N/A
DCTN4	6	1	1	susScr3,cerSim1,loxAfr3,triMan1,hetGla2,hg19	susScr3	susScr3
DEPDC7	6	0	1	odoRosDi,susScr3,cerSim1,loxAfr3,triMan1,dasNov3	#N/A	cerSim1
CCL21	4	0	0	turTru2,cerSim1,triMan1,dasNov3	#N/A	#N/A
DEXI	3	0	0	cerSim1,triMan1,hetGla2	#N/A	#N/A
DCX	6	0	1	orcOrc1,turTru2,loxAfr3,triMan1,hetGla2,hg19	#N/A	turTru2
C14orf2	4	1	3	odoRosDi,cerSim1,loxAfr3,triMan1	loxAfr3	cerSim1,loxAfr3,triMan1
DGKI	6	0	0	odoRosDi,cerSim1,loxAfr3,triMan1,hetGla2,hg19	#N/A	#N/A
DGCR2	5	0	0	odoRosDi,susScr3,loxAfr3,hetGla2,hg19	#N/A	#N/A
CTAG1B	3	1	1	orcOrc1,turTru2,hg19	orcOrc1	orcOrc1
DHH	3	0	0	cerSim1,triMan1,hetGla2	#N/A	#N/A
DDI1	8	0	0	orcOrc1,turTru2,susScr3,cerSim1,loxAfr3,triMan1,dasNov3,hg19	#N/A	#N/A
DLST	5	0	0	cerSim1,loxAfr3,triMan1,dasNov3,hetGla2	#N/A	#N/A
DHRS4L2	3	0	0	susScr3,hetGla2,hg19	#N/A	#N/A
DDRGK1	7	1	1	odoRosDi,turTru2,susScr3,cerSim1,loxAfr3,triMan1,dasNov3	dasNov3	dasNov3
DDX17	6	0	0	turTru2,susScr3,cerSim1,loxAfr3,triMan1,dasNov3	#N/A	#N/A
DDX27	8	0	0	odoRosDi,turTru2,cerSim1,loxAfr3,triMan1,dasNov3,hetGla2,hg19	#N/A	#N/A
DDX46	2	0	0	triMan1,dasNov3	#N/A	#N/A
DMC1	5	0	0	odoRosDi,susScr3,cerSim1,loxAfr3,hetGla2	#N/A	#N/A
C16orf80	#N/A	#N/A	#N/A	#N/A	#N/A	#N/A
DHX29	6	0	0	odoRosDi,turTru2,susScr3,cerSim1,hetGla2,hg19	#N/A	#N/A
CAPZA3	3	0	1	turTru2,cerSim1,loxAfr3	#N/A	cerSim1
DMRTA2	2	0	0	odoRosDi,susScr3	#N/A	#N/A
DHX57	6	0	0	odoRosDi,orcOrc1,susScr3,cerSim1,triMan1,hetGla2	#N/A	#N/A
CTSA	6	0	0	odoRosDi,susScr3,cerSim1,loxAfr3,triMan1,dasNov3	#N/A	#N/A
CLDN16	6	0	0	odoRosDi,orcOrc1,cerSim1,loxAfr3,triMan1,hetGla2	#N/A	#N/A
DIEXF	9	1	2	odoRosDi,orcOrc1,susScr3,cerSim1,loxAfr3,triMan1,dasNov3,hetGla2,hg19	hetGla2	orcOrc1,hetGla2
DIRAS1	3	1	1	cerSim1,loxAfr3,dasNov3	dasNov3	dasNov3
DNAAF1	5	0	0	odoRosDi,turTru2,susScr3,triMan1,hg19	#N/A	#N/A
DISP2	7	0	0	turTru2,cerSim1,loxAfr3,triMan1,dasNov3,hetGla2,hg19	#N/A	#N/A
DNAH3	5	0	0	odoRosDi,turTru2,cerSim1,loxAfr3,triMan1	#N/A	#N/A
DKFZp686O16217	6	0	1	odoRosDi,orcOrc1,turTru2,dasNov3,hetGla2,hg19	#N/A	hg19
CSF2RB	7	0	0	orcOrc1,turTru2,loxAfr3,triMan1,dasNov3,hetGla2,hg19	#N/A	#N/A
DNAJB13	3	0	0	loxAfr3,triMan1,dasNov3	#N/A	#N/A
DLGAP1	4	0	1	turTru2,cerSim1,dasNov3,hetGla2	#N/A	dasNov3
DNAJB9	8	2	3	orcOrc1,turTru2,susScr3,cerSim1,loxAfr3,triMan1,dasNov3,hetGla2	orcOrc1,turTru2	orcOrc1,turTru2,loxAfr3
DLD	6	0	0	odoRosDi,susScr3,cerSim1,loxAfr3,triMan1,dasNov3	#N/A	#N/A
ACBD7	6	1	1	susScr3,cerSim1,loxAfr3,triMan1,dasNov3,hg19	dasNov3	dasNov3
DNAJC30	7	0	1	odoRosDi,turTru2,cerSim1,loxAfr3,triMan1,dasNov3,hetGla2	#N/A	loxAfr3
DNAJC19	3	0	0	orcOrc1,cerSim1,dasNov3	#N/A	#N/A
CATSPER4	8	0	1	odoRosDi,turTru2,susScr3,cerSim1,loxAfr3,triMan1,dasNov3,hg19	#N/A	hg19
DNAL1	2	0	0	susScr3,dasNov3	#N/A	#N/A
DNER	6	0	0	odoRosDi,susScr3,cerSim1,triMan1,dasNov3,hetGla2	#N/A	#N/A
COX7C	5	0	0	orcOrc1,cerSim1,loxAfr3,dasNov3,hetGla2	#N/A	#N/A
CCR9	4	0	0	turTru2,susScr3,cerSim1,hetGla2	#N/A	#N/A
DNMT1	7	0	0	odoRosDi,susScr3,cerSim1,triMan1,dasNov3,hetGla2,hg19	#N/A	#N/A
DOC2B	0	0	0	#N/A	#N/A	#N/A
AGAP2-AS1	5	0	0	odoRosDi,cerSim1,loxAfr3,triMan1,hg19	#N/A	#N/A
DOCK8	9	0	0	odoRosDi,orcOrc1,susScr3,cerSim1,loxAfr3,triMan1,dasNov3,hetGla2,hg19	#N/A	#N/A
ENTPD4	8	0	0	odoRosDi,orcOrc1,turTru2,susScr3,loxAfr3,dasNov3,hetGla2,hg19	#N/A	#N/A
EP400	5	0	0	odoRosDi,orcOrc1,cerSim1,dasNov3,hg19	#N/A	#N/A
EPC1	3	0	0	susScr3,cerSim1,dasNov3	#N/A	#N/A
FIGN	4	0	0	odoRosDi,susScr3,cerSim1,dasNov3	#N/A	#N/A
CTAG2	1	0	0	hg19	#N/A	#N/A
DEFB107B	5	0	0	odoRosDi,susScr3,loxAfr3,triMan1,hg19	#N/A	#N/A
CSTF2	5	0	0	susScr3,cerSim1,loxAfr3,triMan1,hetGla2	#N/A	#N/A
CCDC15	6	0	0	orcOrc1,turTru2,triMan1,dasNov3,hetGla2,hg19	#N/A	#N/A
CCNA1	8	0	1	odoRosDi,turTru2,cerSim1,loxAfr3,triMan1,dasNov3,hetGla2,hg19	#N/A	dasNov3
CXorf49B	4	0	0	susScr3,dasNov3,hetGla2,hg19	#N/A	#N/A
ANO3	6	0	0	orcOrc1,susScr3,cerSim1,loxAfr3,dasNov3,hetGla2	#N/A	#N/A
ADI1	8	0	0	odoRosDi,turTru2,susScr3,cerSim1,loxAfr3,triMan1,hetGla2,hg19	#N/A	#N/A
CTAGE5	4	0	0	turTru2,loxAfr3,dasNov3,hetGla2	#N/A	#N/A
CCDC60	7	0	1	orcOrc1,susScr3,cerSim1,loxAfr3,triMan1,dasNov3,hetGla2	#N/A	triMan1
C11orf95	6	0	0	odoRosDi,susScr3,cerSim1,triMan1,dasNov3,hetGla2	#N/A	#N/A
ARHGDIG	6	0	0	odoRosDi,cerSim1,loxAfr3,triMan1,hetGla2,hg19	#N/A	#N/A
ABHD16B	7	0	1	orcOrc1,turTru2,loxAfr3,triMan1,dasNov3,hetGla2,hg19	#N/A	hetGla2
DAD1	#N/A	#N/A	#N/A	#N/A	#N/A	#N/A
CMC4	3	0	0	susScr3,triMan1,hetGla2	#N/A	#N/A
ARSB	6	0	0	odoRosDi,turTru2,cerSim1,loxAfr3,triMan1,dasNov3	#N/A	#N/A
AMOTL1	6	1	1	turTru2,susScr3,triMan1,dasNov3,hetGla2,hg19	dasNov3	dasNov3
FEZF1	5	0	0	cerSim1,loxAfr3,triMan1,dasNov3,hetGla2	#N/A	#N/A
COL27A1	7	0	0	odoRosDi,orcOrc1,turTru2,susScr3,loxAfr3,dasNov3,hg19	#N/A	#N/A
AK3	4	1	2	turTru2,susScr3,loxAfr3,dasNov3	turTru2	turTru2,loxAfr3
ATF2	7	0	0	odoRosDi,orcOrc1,cerSim1,loxAfr3,triMan1,dasNov3,hetGla2	#N/A	#N/A
ACOT4	7	0	3	orcOrc1,turTru2,susScr3,cerSim1,triMan1,dasNov3,hetGla2	#N/A	turTru2,triMan1,hetGla2
DOCK10	5	0	0	turTru2,cerSim1,loxAfr3,triMan1,hg19	#N/A	#N/A
BZRAP1	4	0	0	odoRosDi,orcOrc1,cerSim1,hg19	#N/A	#N/A
CLCN4	3	0	0	triMan1,dasNov3,hetGla2	#N/A	#N/A
ARG2	6	0	0	orcOrc1,turTru2,susScr3,cerSim1,triMan1,hetGla2	#N/A	#N/A
CTU2	7	0	0	odoRosDi,turTru2,cerSim1,triMan1,dasNov3,hetGla2,hg19	#N/A	#N/A
ASB16	5	0	0	odoRosDi,cerSim1,triMan1,dasNov3,hg19	#N/A	#N/A
BRD8	6	0	0	odoRosDi,loxAfr3,triMan1,dasNov3,hetGla2,hg19	#N/A	#N/A
FBXO48	7	0	0	orcOrc1,susScr3,cerSim1,triMan1,dasNov3,hetGla2,hg19	#N/A	#N/A
DEFB108B	2	0	0	dasNov3,hg19	#N/A	#N/A
CASC4	6	0	0	susScr3,cerSim1,loxAfr3,triMan1,dasNov3,hg19	#N/A	#N/A
BC017347	6	0	0	odoRosDi,turTru2,susScr3,loxAfr3,triMan1,dasNov3	#N/A	#N/A
CPA6	3	0	0	turTru2,triMan1,hg19	#N/A	#N/A
AADAC	3	0	0	dasNov3,hetGla2,hg19	#N/A	#N/A
DHRS4	2	0	0	susScr3,cerSim1	#N/A	#N/A
BST1	8	0	0	odoRosDi,turTru2,cerSim1,loxAfr3,triMan1,dasNov3,hetGla2,hg19	#N/A	#N/A
AGXT2L2	6	0	0	susScr3,cerSim1,triMan1,dasNov3,hetGla2,hg19	#N/A	#N/A
CARKD	10	0	0	odoRosDi,orcOrc1,turTru2,susScr3,cerSim1,loxAfr3,triMan1,dasNov3,hetGla2,hg19	#N/A	#N/A
C16orf82	4	0	0	susScr3,triMan1,dasNov3,hg19	#N/A	#N/A
DFFA	7	0	0	odoRosDi,orcOrc1,turTru2,susScr3,triMan1,dasNov3,hg19	#N/A	#N/A
CABP1	0	0	0	#N/A	#N/A	#N/A
C14orf37	8	1	1	orcOrc1,susScr3,cerSim1,loxAfr3,triMan1,dasNov3,hetGla2,hg19	triMan1	triMan1
ARL2BP	4	0	1	cerSim1,loxAfr3,triMan1,dasNov3	#N/A	cerSim1
CDC25C	4	0	0	odoRosDi,susScr3,cerSim1,dasNov3	#N/A	#N/A
CD74	4	0	0	odoRosDi,orcOrc1,hetGla2,hg19	#N/A	#N/A
ATG12	3	0	0	orcOrc1,hetGla2,hg19	#N/A	#N/A
A2ML1	8	0	0	odoRosDi,orcOrc1,turTru2,susScr3,cerSim1,loxAfr3,dasNov3,hg19	#N/A	#N/A
ABI1	7	0	0	turTru2,susScr3,cerSim1,loxAfr3,triMan1,dasNov3,hetGla2	#N/A	#N/A
BLOC1S1	3	0	0	odoRosDi,susScr3,cerSim1	#N/A	#N/A
CWC22	6	0	0	odoRosDi,cerSim1,loxAfr3,triMan1,dasNov3,hg19	#N/A	#N/A
C10orf118	8	0	0	odoRosDi,turTru2,susScr3,cerSim1,loxAfr3,triMan1,hetGla2,hg19	#N/A	#N/A
COX8A	6	0	0	susScr3,loxAfr3,triMan1,dasNov3,hetGla2,hg19	#N/A	#N/A
CD8A	5	0	0	loxAfr3,triMan1,dasNov3,hetGla2,hg19	#N/A	#N/A
CACNG5	1	0	0	susScr3	#N/A	#N/A
ADPRM	6	0	0	odoRosDi,cerSim1,triMan1,dasNov3,hetGla2,hg19	#N/A	#N/A
AP3M1	4	0	0	odoRosDi,susScr3,cerSim1,hetGla2	#N/A	#N/A
ABCD2	5	0	0	odoRosDi,susScr3,cerSim1,dasNov3,hg19	#N/A	#N/A
CCDC92	6	0	0	turTru2,susScr3,triMan1,dasNov3,hetGla2,hg19	#N/A	#N/A
ACCSL	8	0	0	odoRosDi,orcOrc1,turTru2,susScr3,loxAfr3,triMan1,hetGla2,hg19	#N/A	#N/A
DIRAS2	1	0	0	dasNov3	#N/A	#N/A
DEFB110	7	3	3	susScr3,cerSim1,loxAfr3,triMan1,dasNov3,hetGla2,hg19	cerSim1,loxAfr3,hetGla2	cerSim1,loxAfr3,hetGla2
ADAD2	5	0	0	odoRosDi,susScr3,loxAfr3,triMan1,hetGla2	#N/A	#N/A
CALML5	8	0	0	odoRosDi,orcOrc1,cerSim1,loxAfr3,triMan1,dasNov3,hetGla2,hg19	#N/A	#N/A
ANXA5	5	0	0	odoRosDi,orcOrc1,cerSim1,triMan1,hetGla2	#N/A	#N/A
CAMK1G	7	0	1	odoRosDi,turTru2,susScr3,cerSim1,triMan1,dasNov3,hetGla2	#N/A	hetGla2
COPG2	5	0	0	susScr3,cerSim1,loxAfr3,triMan1,dasNov3	#N/A	#N/A
CABP2	5	0	0	orcOrc1,susScr3,cerSim1,dasNov3,hg19	#N/A	#N/A
DEFB133	6	0	0	odoRosDi,susScr3,cerSim1,loxAfr3,triMan1,dasNov3	#N/A	#N/A
C16orf52	#N/A	#N/A	#N/A	#N/A	#N/A	#N/A
CADM3	4	0	0	orcOrc1,susScr3,loxAfr3,dasNov3	#N/A	#N/A
DAG1	6	0	0	odoRosDi,orcOrc1,turTru2,cerSim1,loxAfr3,hg19	#N/A	#N/A
C15orf39	8	0	0	odoRosDi,orcOrc1,turTru2,susScr3,cerSim1,loxAfr3,triMan1,dasNov3	#N/A	#N/A
BRAP	5	0	0	odoRosDi,loxAfr3,dasNov3,hetGla2,hg19	#N/A	#N/A
CCNJ	5	0	0	odoRosDi,cerSim1,loxAfr3,triMan1,hetGla2	#N/A	#N/A
FBXW2	3	0	0	susScr3,cerSim1,dasNov3	#N/A	#N/A
CTHRC1	6	0	1	odoRosDi,cerSim1,loxAfr3,triMan1,dasNov3,hetGla2	#N/A	hetGla2
CCL4L2	2	0	0	cerSim1,dasNov3	#N/A	#N/A
ALG10B	5	1	1	susScr3,cerSim1,triMan1,dasNov3,hg19	hg19	hg19
ARL5C	6	0	0	odoRosDi,cerSim1,loxAfr3,triMan1,dasNov3,hg19	#N/A	#N/A
BC043620	4	0	0	turTru2,susScr3,triMan1,hetGla2	#N/A	#N/A
ACTG1	#N/A	#N/A	#N/A	#N/A	#N/A	#N/A
ALS2CL	5	0	0	susScr3,cerSim1,triMan1,dasNov3,hetGla2	#N/A	#N/A
CBS	6	0	0	odoRosDi,cerSim1,loxAfr3,dasNov3,hetGla2,hg19	#N/A	#N/A
ARL13A	6	0	0	odoRosDi,cerSim1,loxAfr3,triMan1,dasNov3,hg19	#N/A	#N/A
CXCL6	6	0	0	orcOrc1,turTru2,loxAfr3,triMan1,dasNov3,hetGla2	#N/A	#N/A
CCDC78	6	0	0	cerSim1,loxAfr3,triMan1,dasNov3,hetGla2,hg19	#N/A	#N/A
CD58	5	0	0	odoRosDi,turTru2,cerSim1,triMan1,hg19	#N/A	#N/A
CMIP	3	0	0	cerSim1,dasNov3,hetGla2	#N/A	#N/A
CXCL11	8	0	0	odoRosDi,turTru2,susScr3,cerSim1,loxAfr3,triMan1,dasNov3,hetGla2	#N/A	#N/A
BC037321	4	0	0	cerSim1,triMan1,dasNov3,hg19	#N/A	#N/A
FBXO28	3	0	0	susScr3,triMan1,hetGla2	#N/A	#N/A
CAMKK1	5	0	0	odoRosDi,susScr3,triMan1,dasNov3,hetGla2	#N/A	#N/A
AVPR1B	7	0	0	odoRosDi,turTru2,susScr3,cerSim1,triMan1,hetGla2,hg19	#N/A	#N/A
ACSBG2	7	0	0	odoRosDi,orcOrc1,turTru2,susScr3,loxAfr3,triMan1,dasNov3	#N/A	#N/A
COX11	5	0	0	susScr3,cerSim1,triMan1,dasNov3,hetGla2	#N/A	#N/A
C16orf96	8	0	0	orcOrc1,turTru2,cerSim1,loxAfr3,triMan1,dasNov3,hetGla2,hg19	#N/A	#N/A
C12orf75	3	0	0	odoRosDi,triMan1,hetGla2	#N/A	#N/A
AGPAT1	6	0	0	odoRosDi,susScr3,loxAfr3,triMan1,dasNov3,hetGla2	#N/A	#N/A
DNAJC1	8	1	1	odoRosDi,turTru2,cerSim1,loxAfr3,triMan1,dasNov3,hetGla2,hg19	dasNov3	dasNov3
DEFB121	4	0	0	susScr3,loxAfr3,triMan1,hetGla2	#N/A	#N/A
CORIN	4	0	1	odoRosDi,triMan1,hetGla2,hg19	#N/A	hg19
ADAM20P1	7	0	0	odoRosDi,orcOrc1,turTru2,susScr3,triMan1,hetGla2,hg19	#N/A	#N/A
CAPN8	6	0	0	odoRosDi,orcOrc1,turTru2,cerSim1,triMan1,hetGla2	#N/A	#N/A
DBR1	8	0	0	odoRosDi,orcOrc1,turTru2,loxAfr3,triMan1,dasNov3,hetGla2,hg19	#N/A	#N/A
COQ10A	4	0	0	odoRosDi,turTru2,loxAfr3,triMan1	#N/A	#N/A
BTF3L4	#N/A	#N/A	#N/A	#N/A	#N/A	#N/A
ADCK2	7	0	0	odoRosDi,orcOrc1,turTru2,cerSim1,triMan1,dasNov3,hg19	#N/A	#N/A
ANKRD20A3	5	0	1	susScr3,cerSim1,triMan1,dasNov3,hg19	#N/A	susScr3
CA13	7	0	0	turTru2,susScr3,cerSim1,loxAfr3,triMan1,hetGla2,hg19	#N/A	#N/A
ANGPT4	8	0	1	odoRosDi,orcOrc1,susScr3,cerSim1,loxAfr3,dasNov3,hetGla2,hg19	#N/A	hetGla2
CYB5D1	6	0	1	odoRosDi,susScr3,cerSim1,triMan1,dasNov3,hetGla2	#N/A	triMan1
ACACA	7	0	1	susScr3,cerSim1,loxAfr3,triMan1,dasNov3,hetGla2,hg19	#N/A	triMan1
COX6A1	4	0	0	odoRosDi,turTru2,cerSim1,hetGla2	#N/A	#N/A
DEFB112	4	0	0	odoRosDi,susScr3,cerSim1,triMan1	#N/A	#N/A
DIRAS3	4	0	0	susScr3,cerSim1,loxAfr3,triMan1	#N/A	#N/A
COLGALT2	6	0	0	odoRosDi,turTru2,cerSim1,triMan1,dasNov3,hg19	#N/A	#N/A
CCDC68	9	0	1	odoRosDi,orcOrc1,turTru2,susScr3,cerSim1,loxAfr3,dasNov3,hetGla2,hg19	#N/A	orcOrc1
CXorf21	6	0	0	odoRosDi,turTru2,susScr3,cerSim1,dasNov3,hetGla2	#N/A	#N/A
DNAL4	2	0	0	loxAfr3,dasNov3	#N/A	#N/A
CCDC87	5	0	0	odoRosDi,turTru2,susScr3,triMan1,hetGla2	#N/A	#N/A
CASQ2	4	0	0	odoRosDi,susScr3,dasNov3,hetGla2	#N/A	#N/A
ATP6V0A2	5	0	0	turTru2,triMan1,dasNov3,hetGla2,hg19	#N/A	#N/A
ACSM2B	4	0	0	cerSim1,loxAfr3,triMan1,hg19	#N/A	#N/A
CTSL2	4	0	0	orcOrc1,cerSim1,dasNov3,hg19	#N/A	#N/A
BC023201	1	0	0	hg19	#N/A	#N/A
CXorf51A	5	0	0	odoRosDi,cerSim1,loxAfr3,triMan1,hg19	#N/A	#N/A
C15orf60	6	0	0	odoRosDi,turTru2,loxAfr3,triMan1,dasNov3,hetGla2	#N/A	#N/A
CCL4	5	0	0	turTru2,cerSim1,dasNov3,hetGla2,hg19	#N/A	#N/A
C11orf58	3	0	0	susScr3,cerSim1,dasNov3	#N/A	#N/A
DEFB134	1	0	0	susScr3	#N/A	#N/A
C16orf54	7	0	1	orcOrc1,susScr3,cerSim1,loxAfr3,triMan1,dasNov3,hg19	#N/A	hg19
DNAJC10	5	0	0	cerSim1,loxAfr3,triMan1,dasNov3,hetGla2	#N/A	#N/A
CBX7	4	0	0	susScr3,cerSim1,loxAfr3,dasNov3	#N/A	#N/A
ASPG	4	0	0	turTru2,cerSim1,loxAfr3,hg19	#N/A	#N/A
BLOC1S2	5	0	0	cerSim1,triMan1,dasNov3,hetGla2,hg19	#N/A	#N/A
CCL22	6	0	1	odoRosDi,susScr3,loxAfr3,triMan1,dasNov3,hg19	#N/A	triMan1
ATG13	6	0	2	odoRosDi,cerSim1,loxAfr3,triMan1,hetGla2,hg19	#N/A	cerSim1,hetGla2
AQP4	4	0	0	odoRosDi,cerSim1,loxAfr3,triMan1	#N/A	#N/A
COMP	7	0	0	orcOrc1,turTru2,susScr3,cerSim1,loxAfr3,triMan1,hetGla2	#N/A	#N/A
BATF3	3	0	0	cerSim1,triMan1,hetGla2	#N/A	#N/A
CPNE3	6	0	1	susScr3,cerSim1,loxAfr3,triMan1,hetGla2,hg19	#N/A	triMan1
DEFB123	6	1	1	susScr3,cerSim1,loxAfr3,triMan1,dasNov3,hetGla2	susScr3	susScr3
ADIG	5	0	1	odoRosDi,susScr3,cerSim1,dasNov3,hetGla2	#N/A	dasNov3
ARFGAP2	7	0	0	odoRosDi,turTru2,susScr3,cerSim1,loxAfr3,dasNov3,hetGla2	#N/A	#N/A
CRYZL1	5	0	0	odoRosDi,turTru2,susScr3,triMan1,dasNov3	#N/A	#N/A
DMRTB1	6	0	0	odoRosDi,orcOrc1,loxAfr3,triMan1,dasNov3,hetGla2	#N/A	#N/A
C10orf82	7	0	0	turTru2,susScr3,cerSim1,loxAfr3,triMan1,hetGla2,hg19	#N/A	#N/A
DEFB113	5	0	0	odoRosDi,loxAfr3,triMan1,dasNov3,hg19	#N/A	#N/A
DCBLD1	8	0	0	odoRosDi,orcOrc1,turTru2,susScr3,cerSim1,loxAfr3,triMan1,hetGla2	#N/A	#N/A
ANKRD44	7	0	0	orcOrc1,susScr3,cerSim1,triMan1,dasNov3,hetGla2,hg19	#N/A	#N/A
C12orf76	1	0	0	triMan1	#N/A	#N/A
BC024682	6	0	0	odoRosDi,cerSim1,loxAfr3,triMan1,hetGla2,hg19	#N/A	#N/A
CRHBP	4	0	0	susScr3,cerSim1,triMan1,hetGla2	#N/A	#N/A
ACTG2	#N/A	#N/A	#N/A	#N/A	#N/A	#N/A
CCT5	3	0	0	odoRosDi,cerSim1,dasNov3	#N/A	#N/A
ARL2	4	0	0	susScr3,cerSim1,loxAfr3,triMan1	#N/A	#N/A
COX8C	7	0	1	odoRosDi,susScr3,cerSim1,loxAfr3,triMan1,dasNov3,hetGla2	#N/A	susScr3
CPT1A	7	0	0	odoRosDi,susScr3,cerSim1,triMan1,dasNov3,hetGla2,hg19	#N/A	#N/A
C12orf77	3	0	0	cerSim1,triMan1,hetGla2	#N/A	#N/A
CNDP2	6	0	0	turTru2,susScr3,loxAfr3,triMan1,dasNov3,hg19	#N/A	#N/A
C12orf56	7	0	0	odoRosDi,susScr3,cerSim1,loxAfr3,triMan1,dasNov3,hetGla2	#N/A	#N/A
AMT	8	0	0	orcOrc1,turTru2,cerSim1,loxAfr3,triMan1,dasNov3,hetGla2,hg19	#N/A	#N/A
BNIP3L	4	0	0	cerSim1,loxAfr3,dasNov3,hetGla2	#N/A	#N/A
ADAM32	6	0	0	odoRosDi,cerSim1,loxAfr3,triMan1,dasNov3,hg19	#N/A	#N/A
BOP1	5	0	0	odoRosDi,cerSim1,triMan1,hetGla2,hg19	#N/A	#N/A
CRYBB2	2	0	0	dasNov3,hetGla2	#N/A	#N/A
BTN2A2	5	0	0	cerSim1,triMan1,dasNov3,hetGla2,hg19	#N/A	#N/A
DEFB135	9	0	1	odoRosDi,turTru2,susScr3,cerSim1,loxAfr3,triMan1,dasNov3,hetGla2,hg19	#N/A	hetGla2
ALG8	5	0	0	odoRosDi,susScr3,cerSim1,dasNov3,hetGla2	#N/A	#N/A
CXorf51B	2	0	0	cerSim1,loxAfr3	#N/A	#N/A
ACTL9	5	0	0	orcOrc1,susScr3,dasNov3,hetGla2,hg19	#N/A	#N/A
ARHGEF10L	6	0	0	orcOrc1,susScr3,cerSim1,triMan1,dasNov3,hetGla2	#N/A	#N/A
CUL4A	7	0	0	odoRosDi,orcOrc1,susScr3,cerSim1,triMan1,dasNov3,hetGla2	#N/A	#N/A
CCDC115	6	0	0	odoRosDi,turTru2,cerSim1,loxAfr3,dasNov3,hetGla2	#N/A	#N/A
CAPZB	0	0	0	#N/A	#N/A	#N/A
ATP5C1	5	0	0	odoRosDi,orcOrc1,turTru2,loxAfr3,dasNov3	#N/A	#N/A
ALOX5AP	6	1	1	turTru2,susScr3,cerSim1,dasNov3,hetGla2,hg19	dasNov3	dasNov3
DMD	6	0	0	odoRosDi,orcOrc1,turTru2,loxAfr3,dasNov3,hg19	#N/A	#N/A
CCDC13	8	0	1	odoRosDi,turTru2,susScr3,cerSim1,loxAfr3,triMan1,dasNov3,hg19	#N/A	dasNov3
CA7	4	0	0	odoRosDi,susScr3,cerSim1,loxAfr3	#N/A	#N/A
ATAD1	4	0	0	loxAfr3,triMan1,dasNov3,hetGla2	#N/A	#N/A
ABCA10	5	0	1	odoRosDi,cerSim1,loxAfr3,dasNov3,hg19	#N/A	odoRosDi
DNAJC3	6	0	0	turTru2,cerSim1,loxAfr3,triMan1,dasNov3,hetGla2	#N/A	#N/A
BC037497	6	0	0	odoRosDi,cerSim1,loxAfr3,dasNov3,hetGla2,hg19	#N/A	#N/A
DCTN5	#N/A	#N/A	#N/A	#N/A	#N/A	#N/A
CABP4	9	0	0	odoRosDi,orcOrc1,turTru2,susScr3,cerSim1,loxAfr3,triMan1,dasNov3,hg19	#N/A	#N/A
CSNK1G1	1	0	0	triMan1	#N/A	#N/A
ADRBK1	3	0	0	loxAfr3,dasNov3,hetGla2	#N/A	#N/A
CXorf56	#N/A	#N/A	#N/A	#N/A	#N/A	#N/A
CLDN2	5	1	1	odoRosDi,orcOrc1,cerSim1,loxAfr3,dasNov3	cerSim1	cerSim1
FBXO4	6	1	1	turTru2,cerSim1,loxAfr3,triMan1,dasNov3,hetGla2	turTru2	turTru2
CD320	5	0	0	turTru2,loxAfr3,triMan1,dasNov3,hetGla2	#N/A	#N/A
ACVR1	2	0	0	loxAfr3,dasNov3	#N/A	#N/A
APPL1	6	0	0	odoRosDi,turTru2,cerSim1,loxAfr3,triMan1,hetGla2	#N/A	#N/A
DCXR	4	0	1	odoRosDi,cerSim1,hetGla2,hg19	#N/A	hg19
CNOT7	#N/A	#N/A	#N/A	#N/A	#N/A	#N/A
CMTM5	5	0	1	odoRosDi,turTru2,loxAfr3,triMan1,hetGla2	#N/A	triMan1
AK4	5	0	0	cerSim1,loxAfr3,triMan1,dasNov3,hetGla2	#N/A	#N/A
CXCL12	6	0	0	odoRosDi,susScr3,cerSim1,triMan1,dasNov3,hetGla2	#N/A	#N/A
AIRE	5	0	0	turTru2,cerSim1,loxAfr3,triMan1,dasNov3	#N/A	#N/A
ARL6IP1	1	0	0	cerSim1	#N/A	#N/A
DDTL	3	0	0	susScr3,cerSim1,dasNov3	#N/A	#N/A
AP3M2	3	0	0	loxAfr3,dasNov3,hetGla2	#N/A	#N/A
C13orf35	2	0	0	cerSim1,hg19	#N/A	#N/A
DEFB114	5	0	0	cerSim1,loxAfr3,triMan1,dasNov3,hg19	#N/A	#N/A
C9orf47	3	0	0	turTru2,dasNov3,hg19	#N/A	#N/A
CD59	4	0	0	odoRosDi,loxAfr3,triMan1,hetGla2	#N/A	#N/A
DNALI1	4	0	0	odoRosDi,susScr3,cerSim1,loxAfr3	#N/A	#N/A
CPA1	8	0	0	odoRosDi,turTru2,susScr3,loxAfr3,triMan1,dasNov3,hetGla2,hg19	#N/A	#N/A
C14orf105	9	0	0	odoRosDi,orcOrc1,turTru2,susScr3,cerSim1,loxAfr3,triMan1,dasNov3,hetGla2	#N/A	#N/A
AIFM2	6	0	0	odoRosDi,susScr3,cerSim1,triMan1,dasNov3,hg19	#N/A	#N/A
CACNG6	5	0	0	odoRosDi,susScr3,dasNov3,hetGla2,hg19	#N/A	#N/A
BLOC1S3	3	0	1	dasNov3,hetGla2,hg19	#N/A	hg19
ADIPOQ	9	0	0	odoRosDi,orcOrc1,susScr3,cerSim1,loxAfr3,triMan1,dasNov3,hetGla2,hg19	#N/A	#N/A
CCDC42B	8	0	0	odoRosDi,turTru2,susScr3,cerSim1,loxAfr3,triMan1,hetGla2,hg19	#N/A	#N/A
CTIF	4	0	0	susScr3,loxAfr3,triMan1,hetGla2	#N/A	#N/A
ACIN1	5	0	0	odoRosDi,susScr3,triMan1,dasNov3,hetGla2	#N/A	#N/A
ATG4D	8	0	0	odoRosDi,orcOrc1,turTru2,susScr3,loxAfr3,dasNov3,hetGla2,hg19	#N/A	#N/A
ATF3	3	0	0	turTru2,loxAfr3,dasNov3	#N/A	#N/A
DEFB124	4	0	0	odoRosDi,susScr3,cerSim1,loxAfr3	#N/A	#N/A
ANXA6	8	0	1	odoRosDi,orcOrc1,turTru2,cerSim1,triMan1,dasNov3,hetGla2,hg19	#N/A	triMan1
CASP2	5	0	0	turTru2,susScr3,loxAfr3,triMan1,dasNov3	#N/A	#N/A
DEDD	2	0	0	loxAfr3,dasNov3	#N/A	#N/A
CNRIP1	1	0	0	hetGla2	#N/A	#N/A
CALML6	3	0	0	susScr3,cerSim1,hetGla2	#N/A	#N/A
COX6A2	7	0	0	odoRosDi,susScr3,cerSim1,loxAfr3,triMan1,dasNov3,hetGla2	#N/A	#N/A
DEFB136	6	0	0	odoRosDi,orcOrc1,susScr3,cerSim1,triMan1,hetGla2	#N/A	#N/A
APC2	6	0	0	odoRosDi,orcOrc1,turTru2,susScr3,hetGla2,hg19	#N/A	#N/A
ANKRD34B	9	1	1	odoRosDi,orcOrc1,susScr3,cerSim1,loxAfr3,triMan1,dasNov3,hetGla2,hg19	hetGla2	hetGla2
ABO	0	0	0	#N/A	#N/A	#N/A
C11orf63	9	0	0	odoRosDi,orcOrc1,susScr3,cerSim1,loxAfr3,triMan1,dasNov3,hetGla2,hg19	#N/A	#N/A
CA14	7	0	0	odoRosDi,orcOrc1,turTru2,cerSim1,triMan1,hetGla2,hg19	#N/A	#N/A
CCNE1	8	0	0	odoRosDi,turTru2,susScr3,cerSim1,loxAfr3,triMan1,hetGla2,hg19	#N/A	#N/A
DNAJB14	6	0	0	turTru2,susScr3,cerSim1,loxAfr3,dasNov3,hetGla2	#N/A	#N/A
CYC1	7	0	0	turTru2,cerSim1,loxAfr3,triMan1,dasNov3,hetGla2,hg19	#N/A	#N/A
CXCL9	4	1	1	odoRosDi,turTru2,cerSim1,loxAfr3	cerSim1	cerSim1
CRISP2	8	0	0	odoRosDi,orcOrc1,cerSim1,loxAfr3,triMan1,dasNov3,hetGla2,hg19	#N/A	#N/A
ACTL10	4	0	0	odoRosDi,loxAfr3,triMan1,dasNov3	#N/A	#N/A
ARMCX1	3	0	0	odoRosDi,triMan1,dasNov3	#N/A	#N/A
BATF	1	0	0	dasNov3	#N/A	#N/A
ACAN	8	0	0	orcOrc1,turTru2,susScr3,cerSim1,triMan1,dasNov3,hetGla2,hg19	#N/A	#N/A
CCL23	6	0	1	orcOrc1,turTru2,loxAfr3,triMan1,hetGla2,hg19	#N/A	orcOrc1
AGFG2	5	0	0	odoRosDi,susScr3,loxAfr3,dasNov3,hetGla2	#N/A	#N/A
ABP1	7	0	0	odoRosDi,orcOrc1,turTru2,loxAfr3,triMan1,dasNov3,hetGla2	#N/A	#N/A
C14orf166B	5	0	0	orcOrc1,susScr3,cerSim1,loxAfr3,triMan1	#N/A	#N/A
AP5S1	4	0	0	odoRosDi,loxAfr3,triMan1,hetGla2	#N/A	#N/A
ASCC2	10	0	0	odoRosDi,orcOrc1,turTru2,susScr3,cerSim1,loxAfr3,triMan1,dasNov3,hetGla2,hg19	#N/A	#N/A
DEFB115	0	0	0	#N/A	#N/A	#N/A
ARNT	4	0	0	orcOrc1,susScr3,triMan1,hg19	#N/A	#N/A
C9orf50	3	1	1	cerSim1,triMan1,hg19	hg19	hg19
AGPAT2	6	0	0	odoRosDi,turTru2,susScr3,triMan1,hetGla2,hg19	#N/A	#N/A
DAAM1	6	1	1	odoRosDi,susScr3,cerSim1,loxAfr3,triMan1,hetGla2	cerSim1	cerSim1
DDT	4	0	2	turTru2,loxAfr3,triMan1,hetGla2	#N/A	turTru2,hetGla2
BMP1	5	0	0	odoRosDi,susScr3,cerSim1,dasNov3,hg19	#N/A	#N/A
DLEC1	6	0	0	odoRosDi,orcOrc1,turTru2,susScr3,dasNov3,hetGla2	#N/A	#N/A
AARS	6	0	0	odoRosDi,orcOrc1,cerSim1,triMan1,dasNov3,hetGla2	#N/A	#N/A
COPRS	5	0	0	turTru2,loxAfr3,dasNov3,hetGla2,hg19	#N/A	#N/A
ABI2	3	0	0	odoRosDi,susScr3,dasNov3	#N/A	#N/A
DLX1	0	0	0	#N/A	#N/A	#N/A
ADAMTSL5	6	0	0	odoRosDi,orcOrc1,turTru2,cerSim1,hetGla2,hg19	#N/A	#N/A
CCL5	6	0	0	orcOrc1,susScr3,loxAfr3,triMan1,dasNov3,hetGla2	#N/A	#N/A
ADD3	6	0	0	odoRosDi,susScr3,cerSim1,triMan1,hetGla2,hg19	#N/A	#N/A
BTF3	0	0	0	#N/A	#N/A	#N/A
DKFZp761D112	5	0	0	turTru2,susScr3,cerSim1,loxAfr3,triMan1	#N/A	#N/A
DHODH	5	0	0	orcOrc1,loxAfr3,triMan1,dasNov3,hg19	#N/A	#N/A
ARL2-SNX15	2	0	0	loxAfr3,hetGla2	#N/A	#N/A
CNOT8	1	0	0	hetGla2	#N/A	#N/A
BLOC1S4	3	1	1	odoRosDi,orcOrc1,turTru2	turTru2	turTru2
DHRS7B	8	0	0	odoRosDi,turTru2,cerSim1,loxAfr3,triMan1,dasNov3,hetGla2,hg19	#N/A	#N/A
CYSTM1	2	0	0	loxAfr3,dasNov3	#N/A	#N/A
CD8B	5	0	0	turTru2,susScr3,cerSim1,dasNov3,hetGla2	#N/A	#N/A
ARGFX	9	0	1	orcOrc1,turTru2,susScr3,cerSim1,loxAfr3,triMan1,dasNov3,hetGla2,hg19	#N/A	triMan1
DAXX	7	0	0	odoRosDi,turTru2,cerSim1,loxAfr3,triMan1,hetGla2,hg19	#N/A	#N/A
DCTN6	5	0	0	turTru2,cerSim1,loxAfr3,triMan1,hetGla2	#N/A	#N/A
C1orf170	6	1	1	orcOrc1,turTru2,susScr3,loxAfr3,dasNov3,hg19	turTru2	turTru2
DENND1A	6	0	0	odoRosDi,orcOrc1,susScr3,cerSim1,loxAfr3,hetGla2	#N/A	#N/A
CSTF2T	6	0	1	odoRosDi,cerSim1,loxAfr3,triMan1,dasNov3,hg19	#N/A	hg19
ACP1	6	0	0	odoRosDi,susScr3,cerSim1,loxAfr3,dasNov3,hetGla2	#N/A	#N/A
CTSB	9	0	0	odoRosDi,turTru2,susScr3,cerSim1,loxAfr3,triMan1,dasNov3,hetGla2,hg19	#N/A	#N/A
DIRC1	4	0	0	cerSim1,loxAfr3,dasNov3,hetGla2	#N/A	#N/A
DEFB125	5	0	0	odoRosDi,orcOrc1,susScr3,cerSim1,hg19	#N/A	#N/A
BRWD1-AS1	3	0	0	odoRosDi,susScr3,dasNov3	#N/A	#N/A
ATF4	5	0	0	odoRosDi,cerSim1,dasNov3,hetGla2,hg19	#N/A	#N/A
DEFB116	5	0	0	odoRosDi,susScr3,cerSim1,loxAfr3,triMan1	#N/A	#N/A
CR1L	5	0	0	cerSim1,loxAfr3,triMan1,dasNov3,hg19	#N/A	#N/A
DEFB1	3	0	0	susScr3,cerSim1,hg19	#N/A	#N/A
ARHGAP39	8	0	1	odoRosDi,turTru2,susScr3,cerSim1,loxAfr3,triMan1,dasNov3,hetGla2	#N/A	dasNov3
CBX8	8	0	0	odoRosDi,susScr3,cerSim1,loxAfr3,triMan1,dasNov3,hetGla2,hg19	#N/A	#N/A
CCDC116	7	0	0	odoRosDi,orcOrc1,susScr3,triMan1,dasNov3,hetGla2,hg19	#N/A	#N/A
CD40	8	0	1	odoRosDi,orcOrc1,turTru2,susScr3,cerSim1,dasNov3,hetGla2,hg19	#N/A	hg19
ADNP	9	2	2	orcOrc1,turTru2,susScr3,cerSim1,loxAfr3,triMan1,dasNov3,hetGla2,hg19	orcOrc1,loxAfr3	orcOrc1,loxAfr3
C16orf86	5	0	0	turTru2,cerSim1,triMan1,hetGla2,hg19	#N/A	#N/A
CRYBB3	8	0	2	orcOrc1,susScr3,cerSim1,loxAfr3,triMan1,dasNov3,hetGla2,hg19	#N/A	hetGla2,hg19
ARR3	5	0	1	susScr3,cerSim1,loxAfr3,triMan1,hg19	#N/A	triMan1
ATAD2B	7	0	0	odoRosDi,turTru2,cerSim1,triMan1,dasNov3,hetGla2,hg19	#N/A	#N/A
FBXW4	4	0	0	odoRosDi,susScr3,loxAfr3,hetGla2	#N/A	#N/A
ARL13B	8	0	0	odoRosDi,turTru2,susScr3,cerSim1,loxAfr3,triMan1,hetGla2,hg19	#N/A	#N/A
CXorf57	1	0	0	dasNov3	#N/A	#N/A
CCNA2	5	0	0	susScr3,cerSim1,triMan1,dasNov3,hg19	#N/A	#N/A
CYP2B6	5	0	2	susScr3,loxAfr3,triMan1,hetGla2,hg19	#N/A	loxAfr3,triMan1
BC029255	1	0	0	hetGla2	#N/A	#N/A
APIP	7	0	0	odoRosDi,turTru2,susScr3,cerSim1,loxAfr3,triMan1,dasNov3	#N/A	#N/A
CLASP2	7	0	0	odoRosDi,turTru2,cerSim1,loxAfr3,triMan1,dasNov3,hg19	#N/A	#N/A
CMTM6	7	0	0	odoRosDi,turTru2,susScr3,triMan1,dasNov3,hetGla2,hg19	#N/A	#N/A
CARD10	4	0	0	odoRosDi,cerSim1,dasNov3,hetGla2	#N/A	#N/A
COX6B1	6	0	0	odoRosDi,susScr3,cerSim1,triMan1,dasNov3,hetGla2	#N/A	#N/A
CD22	8	0	0	orcOrc1,turTru2,cerSim1,loxAfr3,triMan1,dasNov3,hetGla2,hg19	#N/A	#N/A
DEFB4A	4	0	0	cerSim1,dasNov3,hetGla2,hg19	#N/A	#N/A
CD19	5	0	0	odoRosDi,susScr3,cerSim1,hetGla2,hg19	#N/A	#N/A
DIRC2	4	0	0	loxAfr3,triMan1,dasNov3,hetGla2	#N/A	#N/A
CCK	8	0	0	odoRosDi,orcOrc1,susScr3,cerSim1,loxAfr3,triMan1,dasNov3,hetGla2	#N/A	#N/A
ARHGEF3	7	0	0	odoRosDi,orcOrc1,susScr3,cerSim1,loxAfr3,triMan1,dasNov3	#N/A	#N/A
CNST	4	0	0	odoRosDi,turTru2,cerSim1,hetGla2	#N/A	#N/A
ALG10	5	0	0	susScr3,cerSim1,triMan1,dasNov3,hg19	#N/A	#N/A
AGAP2	7	0	0	orcOrc1,turTru2,cerSim1,loxAfr3,dasNov3,hetGla2,hg19	#N/A	#N/A
CLCN5	6	0	0	susScr3,cerSim1,loxAfr3,triMan1,dasNov3,hetGla2	#N/A	#N/A
CPAMD8	2	0	0	odoRosDi,orcOrc1	#N/A	#N/A
DKFZp779M0652	5	0	0	odoRosDi,cerSim1,loxAfr3,dasNov3,hg19	#N/A	#N/A
CCNK	5	0	0	cerSim1,loxAfr3,triMan1,dasNov3,hetGla2	#N/A	#N/A
DDX10	8	0	1	odoRosDi,turTru2,susScr3,cerSim1,loxAfr3,triMan1,hetGla2,hg19	#N/A	hg19
DGCR6L	5	0	0	odoRosDi,cerSim1,triMan1,hetGla2,hg19	#N/A	#N/A
CACNA2D2	5	0	0	turTru2,cerSim1,triMan1,dasNov3,hetGla2	#N/A	#N/A
ASGR2	6	0	0	odoRosDi,susScr3,loxAfr3,triMan1,dasNov3,hg19	#N/A	#N/A
BLOC1S6	6	0	0	odoRosDi,turTru2,cerSim1,loxAfr3,triMan1,dasNov3	#N/A	#N/A
AQP5	3	0	0	odoRosDi,cerSim1,dasNov3	#N/A	#N/A
ADRA1A	4	0	0	odoRosDi,cerSim1,triMan1,dasNov3	#N/A	#N/A
BRWD1-IT2	6	1	1	odoRosDi,orcOrc1,turTru2,loxAfr3,triMan1,hg19	hg19	hg19
DEFB4B	4	0	0	cerSim1,dasNov3,hetGla2,hg19	#N/A	#N/A
ASB17	9	0	2	odoRosDi,orcOrc1,turTru2,cerSim1,loxAfr3,triMan1,dasNov3,hetGla2,hg19	#N/A	loxAfr3,hetGla2
BC031305	7	0	0	odoRosDi,susScr3,cerSim1,triMan1,dasNov3,hetGla2,hg19	#N/A	#N/A
DEFB126	1	0	0	odoRosDi	#N/A	#N/A
DDI2	5	0	0	odoRosDi,susScr3,cerSim1,triMan1,dasNov3	#N/A	#N/A
CAMK1	6	0	0	susScr3,cerSim1,triMan1,dasNov3,hetGla2,hg19	#N/A	#N/A
DDX18	7	0	0	susScr3,cerSim1,loxAfr3,triMan1,dasNov3,hetGla2,hg19	#N/A	#N/A
ADAM20	6	0	0	odoRosDi,turTru2,loxAfr3,triMan1,dasNov3,hg19	#N/A	#N/A
CYTH1	3	0	0	turTru2,susScr3,loxAfr3	#N/A	#N/A
ATP5J	7	0	0	odoRosDi,susScr3,cerSim1,loxAfr3,triMan1,dasNov3,hg19	#N/A	#N/A
CYB5D2	7	0	0	odoRosDi,susScr3,cerSim1,loxAfr3,triMan1,hetGla2,hg19	#N/A	#N/A
BAX	3	0	0	odoRosDi,dasNov3,hetGla2	#N/A	#N/A
DEF6	7	0	0	odoRosDi,orcOrc1,susScr3,cerSim1,triMan1,hetGla2,hg19	#N/A	#N/A
BNIP3	3	0	0	susScr3,cerSim1,triMan1	#N/A	#N/A
DAPK1	7	0	0	odoRosDi,turTru2,cerSim1,triMan1,dasNov3,hetGla2,hg19	#N/A	#N/A
ARL6IP4	7	0	0	odoRosDi,turTru2,susScr3,loxAfr3,triMan1,hetGla2,hg19	#N/A	#N/A
C10orf32	0	0	0	#N/A	#N/A	#N/A
CCDC106	5	0	0	odoRosDi,cerSim1,dasNov3,hetGla2,hg19	#N/A	#N/A
COX14	5	0	0	odoRosDi,cerSim1,loxAfr3,dasNov3,hetGla2	#N/A	#N/A
ACTR6	5	1	1	turTru2,susScr3,cerSim1,triMan1,dasNov3	turTru2	turTru2
BST2	4	0	0	odoRosDi,orcOrc1,turTru2,hg19	#N/A	#N/A
C12orf42	6	0	0	odoRosDi,orcOrc1,cerSim1,loxAfr3,triMan1,hg19	#N/A	#N/A
DEGS1	5	0	0	cerSim1,triMan1,dasNov3,hetGla2,hg19	#N/A	#N/A
DEFB118	6	0	0	odoRosDi,susScr3,cerSim1,triMan1,dasNov3,hetGla2	#N/A	#N/A
CBLC	8	0	0	odoRosDi,turTru2,susScr3,cerSim1,loxAfr3,triMan1,hetGla2,hg19	#N/A	#N/A
ALK	8	0	0	odoRosDi,orcOrc1,susScr3,cerSim1,triMan1,dasNov3,hetGla2,hg19	#N/A	#N/A
CCL7	4	0	0	susScr3,cerSim1,triMan1,dasNov3	#N/A	#N/A
CXCL13	8	0	0	odoRosDi,orcOrc1,turTru2,susScr3,cerSim1,loxAfr3,triMan1,dasNov3	#N/A	#N/A
CBWD1	4	0	0	susScr3,loxAfr3,triMan1,hg19	#N/A	#N/A
DEPTOR	5	0	0	susScr3,cerSim1,loxAfr3,dasNov3,hetGla2	#N/A	#N/A
CD5L	9	0	1	odoRosDi,orcOrc1,turTru2,susScr3,cerSim1,loxAfr3,triMan1,dasNov3,hg19	#N/A	triMan1
AK5	7	0	0	odoRosDi,orcOrc1,turTru2,cerSim1,loxAfr3,triMan1,hetGla2	#N/A	#N/A
DEFB127	8	0	0	odoRosDi,orcOrc1,turTru2,susScr3,cerSim1,triMan1,dasNov3,hg19	#N/A	#N/A
CNNM2	4	0	0	cerSim1,loxAfr3,dasNov3,hetGla2	#N/A	#N/A
FEZF2	3	0	1	cerSim1,triMan1,hetGla2	#N/A	hetGla2
AGXT2	7	0	0	odoRosDi,orcOrc1,susScr3,cerSim1,loxAfr3,triMan1,dasNov3	#N/A	#N/A
APOL1	4	0	1	susScr3,cerSim1,hetGla2,hg19	#N/A	hg19
DDA1	#N/A	#N/A	#N/A	#N/A	#N/A	#N/A
DLX2	4	0	0	susScr3,loxAfr3,hetGla2,hg19	#N/A	#N/A
CLDN17	10	2	2	odoRosDi,orcOrc1,turTru2,susScr3,cerSim1,loxAfr3,triMan1,dasNov3,hetGla2,hg19	loxAfr3,triMan1	loxAfr3,triMan1
C11orf31	4	0	0	susScr3,loxAfr3,triMan1,dasNov3	#N/A	#N/A
CXorf22	6	0	0	odoRosDi,orcOrc1,turTru2,triMan1,dasNov3,hetGla2	#N/A	#N/A
CXCR1	8	0	0	orcOrc1,turTru2,susScr3,cerSim1,loxAfr3,triMan1,dasNov3,hg19	#N/A	#N/A
CNPPD1	5	0	1	odoRosDi,loxAfr3,dasNov3,hetGla2,hg19	#N/A	hg19
ANKRD61	6	0	0	orcOrc1,turTru2,cerSim1,triMan1,dasNov3,hetGla2	#N/A	#N/A
CCL24	4	0	0	orcOrc1,cerSim1,dasNov3,hg19	#N/A	#N/A
CRNKL1	6	0	0	turTru2,susScr3,loxAfr3,triMan1,hetGla2,hg19	#N/A	#N/A
CARM1	5	0	0	susScr3,cerSim1,loxAfr3,triMan1,dasNov3	#N/A	#N/A
CLDN3	4	0	0	cerSim1,loxAfr3,triMan1,dasNov3	#N/A	#N/A
BRWD1	8	0	0	odoRosDi,orcOrc1,turTru2,susScr3,cerSim1,triMan1,dasNov3,hg19	#N/A	#N/A
CCDC93	5	0	0	odoRosDi,turTru2,susScr3,dasNov3,hg19	#N/A	#N/A
DNASE1L1	5	0	0	odoRosDi,triMan1,dasNov3,hetGla2,hg19	#N/A	#N/A
BTBD19	7	0	0	susScr3,cerSim1,loxAfr3,triMan1,dasNov3,hetGla2,hg19	#N/A	#N/A
CTSL3P	0	0	0	#N/A	#N/A	#N/A
CCT6A	3	0	0	susScr3,cerSim1,dasNov3	#N/A	#N/A
BTG1	2	0	0	cerSim1,dasNov3	#N/A	#N/A
ABCC2	9	0	0	odoRosDi,orcOrc1,turTru2,susScr3,cerSim1,loxAfr3,triMan1,hetGla2,hg19	#N/A	#N/A
C10orf88	7	0	0	odoRosDi,orcOrc1,susScr3,cerSim1,loxAfr3,hetGla2,hg19	#N/A	#N/A
BPIFB2	6	0	0	odoRosDi,susScr3,cerSim1,loxAfr3,triMan1,hg19	#N/A	#N/A
ATP5D	6	0	1	odoRosDi,orcOrc1,susScr3,loxAfr3,triMan1,hetGla2	#N/A	loxAfr3
FBXO2	4	0	0	turTru2,susScr3,loxAfr3,hg19	#N/A	#N/A
COX6B2	3	0	0	loxAfr3,triMan1,hetGla2	#N/A	#N/A
CTSO	8	0	1	odoRosDi,orcOrc1,turTru2,cerSim1,loxAfr3,triMan1,dasNov3,hetGla2	#N/A	triMan1
CSNK1G2	1	0	0	susScr3	#N/A	#N/A
BICD1	7	1	1	orcOrc1,turTru2,susScr3,cerSim1,triMan1,dasNov3,hetGla2	dasNov3	dasNov3
CADM4	1	0	0	cerSim1	#N/A	#N/A
CACNG7	#N/A	#N/A	#N/A	#N/A	#N/A	#N/A
BC047513	5	0	0	susScr3,cerSim1,loxAfr3,triMan1,hetGla2	#N/A	#N/A
CYCS	4	0	0	loxAfr3,triMan1,dasNov3,hetGla2	#N/A	#N/A
CRH	4	0	0	loxAfr3,triMan1,dasNov3,hetGla2	#N/A	#N/A
CA8	2	0	0	cerSim1,loxAfr3	#N/A	#N/A
ACP2	4	1	1	odoRosDi,cerSim1,triMan1,hetGla2	cerSim1	cerSim1
DBF4	7	0	0	odoRosDi,turTru2,cerSim1,triMan1,dasNov3,hetGla2,hg19	#N/A	#N/A
DMRTC1	2	0	0	susScr3,cerSim1	#N/A	#N/A
CDC26	3	0	0	cerSim1,dasNov3,hetGla2	#N/A	#N/A
AP3S1	#N/A	#N/A	#N/A	#N/A	#N/A	#N/A
COPS2	#N/A	#N/A	#N/A	#N/A	#N/A	#N/A
DCAF15	8	0	0	odoRosDi,turTru2,susScr3,cerSim1,triMan1,dasNov3,hetGla2,hg19	#N/A	#N/A
AP5Z1	8	0	0	odoRosDi,turTru2,susScr3,cerSim1,triMan1,dasNov3,hetGla2,hg19	#N/A	#N/A
CRTC3	4	0	0	susScr3,cerSim1,loxAfr3,dasNov3	#N/A	#N/A
COX15	4	0	0	orcOrc1,loxAfr3,dasNov3,hetGla2	#N/A	#N/A
AGR2	5	1	1	odoRosDi,susScr3,cerSim1,loxAfr3,triMan1	susScr3	susScr3
ADAMTS4	6	0	0	odoRosDi,orcOrc1,susScr3,triMan1,dasNov3,hg19	#N/A	#N/A
ENTPD5	5	0	0	odoRosDi,cerSim1,loxAfr3,triMan1,dasNov3	#N/A	#N/A
CNTN3	7	0	0	odoRosDi,turTru2,susScr3,loxAfr3,triMan1,hetGla2,hg19	#N/A	#N/A
ALOX5	6	0	0	orcOrc1,susScr3,triMan1,dasNov3,hetGla2,hg19	#N/A	#N/A
DFFB	5	0	0	odoRosDi,susScr3,cerSim1,triMan1,dasNov3	#N/A	#N/A
C10orf35	6	0	0	odoRosDi,susScr3,loxAfr3,triMan1,dasNov3,hetGla2	#N/A	#N/A
CD79A	5	0	0	odoRosDi,orcOrc1,cerSim1,hetGla2,hg19	#N/A	#N/A
BC037891	6	0	0	odoRosDi,cerSim1,loxAfr3,triMan1,dasNov3,hg19	#N/A	#N/A
C16orf55	5	0	1	odoRosDi,susScr3,cerSim1,triMan1,hetGla2	#N/A	susScr3
DKK1	9	0	0	odoRosDi,orcOrc1,susScr3,cerSim1,loxAfr3,triMan1,dasNov3,hetGla2,hg19	#N/A	#N/A
CAMKK2	6	0	1	odoRosDi,susScr3,cerSim1,triMan1,dasNov3,hetGla2	#N/A	dasNov3
COQ10B	5	0	0	susScr3,loxAfr3,triMan1,dasNov3,hetGla2	#N/A	#N/A
CREB5	5	0	0	turTru2,susScr3,loxAfr3,triMan1,dasNov3	#N/A	#N/A
ACVR2A	3	0	0	cerSim1,dasNov3,hetGla2	#N/A	#N/A
DDAH1	7	0	1	turTru2,susScr3,cerSim1,loxAfr3,triMan1,dasNov3,hetGla2	#N/A	susScr3
BRAT1	7	0	0	odoRosDi,turTru2,susScr3,triMan1,dasNov3,hetGla2,hg19	#N/A	#N/A
FILIP1L	7	0	0	odoRosDi,turTru2,susScr3,cerSim1,dasNov3,hetGla2,hg19	#N/A	#N/A
DIMT1	6	0	0	susScr3,cerSim1,loxAfr3,triMan1,dasNov3,hetGla2	#N/A	#N/A
DCT	7	0	0	odoRosDi,orcOrc1,turTru2,susScr3,triMan1,hetGla2,hg19	#N/A	#N/A
ABCD3	5	0	0	susScr3,cerSim1,loxAfr3,triMan1,dasNov3	#N/A	#N/A
CCDC69	6	0	1	odoRosDi,orcOrc1,turTru2,triMan1,hetGla2,hg19	#N/A	hetGla2
CRYZ	8	0	0	odoRosDi,orcOrc1,susScr3,cerSim1,triMan1,dasNov3,hetGla2,hg19	#N/A	#N/A
ARGLU1	1	0	0	cerSim1	#N/A	#N/A
C15orf61	3	0	0	odoRosDi,dasNov3,hetGla2	#N/A	#N/A
CYP24A1	7	0	0	orcOrc1,turTru2,loxAfr3,triMan1,dasNov3,hetGla2,hg19	#N/A	#N/A
COX6C	4	0	0	susScr3,cerSim1,loxAfr3,triMan1	#N/A	#N/A
AMBP	9	0	0	odoRosDi,orcOrc1,susScr3,cerSim1,loxAfr3,triMan1,dasNov3,hetGla2,hg19	#N/A	#N/A
AMY1A	3	0	1	susScr3,triMan1,hg19	#N/A	susScr3
BNIPL	5	0	0	orcOrc1,turTru2,cerSim1,triMan1,hetGla2	#N/A	#N/A
CCL11	4	0	0	susScr3,loxAfr3,triMan1,hetGla2	#N/A	#N/A
DCBLD2	5	0	0	odoRosDi,cerSim1,loxAfr3,hetGla2,hg19	#N/A	#N/A
DDX58	6	0	0	odoRosDi,orcOrc1,susScr3,cerSim1,dasNov3,hetGla2	#N/A	#N/A
ARL3	0	0	0	#N/A	#N/A	#N/A
CCBE1	5	0	0	cerSim1,loxAfr3,triMan1,hetGla2,hg19	#N/A	#N/A
ANKHD1-EIF4EBP3	5	0	0	odoRosDi,turTru2,susScr3,dasNov3,hetGla2	#N/A	#N/A
ATP5L2	0	0	0	#N/A	#N/A	#N/A
AVPR2	5	0	0	odoRosDi,turTru2,susScr3,cerSim1,hetGla2	#N/A	#N/A
ADIPOR1	5	0	0	odoRosDi,orcOrc1,susScr3,triMan1,dasNov3	#N/A	#N/A
CYFIP1	5	0	0	odoRosDi,cerSim1,loxAfr3,triMan1,dasNov3	#N/A	#N/A
DGCR6	4	0	0	cerSim1,triMan1,hetGla2,hg19	#N/A	#N/A
ATP5L	3	0	0	odoRosDi,dasNov3,hetGla2	#N/A	#N/A
COLQ	9	1	1	odoRosDi,orcOrc1,turTru2,susScr3,cerSim1,loxAfr3,triMan1,dasNov3,hg19	dasNov3	dasNov3
DEFB128	6	0	0	odoRosDi,orcOrc1,susScr3,loxAfr3,hetGla2,hg19	#N/A	#N/A
CCL25	3	0	0	loxAfr3,triMan1,dasNov3	#N/A	#N/A
AGPAT3	5	0	0	cerSim1,loxAfr3,triMan1,dasNov3,hetGla2	#N/A	#N/A
CDC27	4	0	0	loxAfr3,triMan1,dasNov3,hetGla2	#N/A	#N/A
CACNG8	2	0	1	orcOrc1,turTru2	#N/A	orcOrc1
CYP11B1	4	0	0	turTru2,triMan1,hetGla2,hg19	#N/A	#N/A
BLVRA	6	0	0	odoRosDi,turTru2,cerSim1,loxAfr3,triMan1,hetGla2	#N/A	#N/A
ACSM3	8	0	0	orcOrc1,turTru2,susScr3,cerSim1,triMan1,dasNov3,hetGla2,hg19	#N/A	#N/A
C9orf53	3	0	0	odoRosDi,dasNov3,hg19	#N/A	#N/A
CTNND2	6	0	0	odoRosDi,orcOrc1,turTru2,cerSim1,loxAfr3,dasNov3	#N/A	#N/A
CABP5	4	0	1	odoRosDi,triMan1,dasNov3,hetGla2	#N/A	hetGla2
CTXN1	0	0	0	#N/A	#N/A	#N/A
EPC2	8	2	2	odoRosDi,orcOrc1,turTru2,cerSim1,loxAfr3,triMan1,dasNov3,hg19	orcOrc1,turTru2	orcOrc1,turTru2
DNAJB1	2	0	0	odoRosDi,susScr3	#N/A	#N/A
CRISP3	5	0	0	susScr3,cerSim1,loxAfr3,dasNov3,hg19	#N/A	#N/A
CASC5	7	0	0	odoRosDi,orcOrc1,cerSim1,loxAfr3,triMan1,dasNov3,hetGla2	#N/A	#N/A
FCRL4	6	0	0	odoRosDi,turTru2,susScr3,dasNov3,hetGla2,hg19	#N/A	#N/A
APITD1-CORT	5	0	0	susScr3,loxAfr3,triMan1,dasNov3,hetGla2	#N/A	#N/A
CCDC107	7	0	0	odoRosDi,susScr3,cerSim1,triMan1,dasNov3,hetGla2,hg19	#N/A	#N/A
ACOT6	4	0	0	susScr3,cerSim1,loxAfr3,triMan1	#N/A	#N/A
CATSPERB	9	0	0	odoRosDi,turTru2,susScr3,cerSim1,loxAfr3,triMan1,dasNov3,hetGla2,hg19	#N/A	#N/A
CRYBG3	8	0	1	orcOrc1,turTru2,cerSim1,loxAfr3,triMan1,dasNov3,hetGla2,hg19	#N/A	triMan1
CTSC	8	0	0	odoRosDi,orcOrc1,susScr3,cerSim1,loxAfr3,triMan1,dasNov3,hg19	#N/A	#N/A
DMRTC2	7	0	0	odoRosDi,orcOrc1,turTru2,susScr3,cerSim1,loxAfr3,dasNov3	#N/A	#N/A
CALN1	2	0	0	loxAfr3,triMan1	#N/A	#N/A
C11orf34	5	0	0	turTru2,susScr3,dasNov3,hetGla2,hg19	#N/A	#N/A
CPNE4	4	0	0	orcOrc1,turTru2,dasNov3,hetGla2	#N/A	#N/A
CYP4A22	3	0	0	susScr3,cerSim1,dasNov3	#N/A	#N/A
CA1	6	0	0	odoRosDi,orcOrc1,cerSim1,dasNov3,hetGla2,hg19	#N/A	#N/A
DDX47	5	0	0	odoRosDi,susScr3,cerSim1,dasNov3,hetGla2	#N/A	#N/A
CR1	5	0	0	cerSim1,loxAfr3,triMan1,dasNov3,hg19	#N/A	#N/A
APOB	8	0	0	orcOrc1,turTru2,susScr3,cerSim1,triMan1,dasNov3,hetGla2,hg19	#N/A	#N/A
BC049386	4	0	0	odoRosDi,susScr3,dasNov3,hetGla2	#N/A	#N/A
CCDC42	5	0	1	susScr3,cerSim1,dasNov3,hetGla2,hg19	#N/A	cerSim1
CD93	8	0	0	odoRosDi,orcOrc1,susScr3,loxAfr3,triMan1,dasNov3,hetGla2,hg19	#N/A	#N/A
CNEP1R1	4	0	0	loxAfr3,triMan1,dasNov3,hetGla2	#N/A	#N/A
AP2A2	5	0	0	susScr3,cerSim1,triMan1,dasNov3,hetGla2	#N/A	#N/A
CNIH2	#N/A	#N/A	#N/A	#N/A	#N/A	#N/A
CCRL1	5	0	0	odoRosDi,cerSim1,triMan1,hetGla2,hg19	#N/A	#N/A
CCL8	6	0	0	odoRosDi,orcOrc1,susScr3,cerSim1,triMan1,dasNov3	#N/A	#N/A
CTXN2	6	0	1	turTru2,susScr3,cerSim1,loxAfr3,dasNov3,hetGla2	#N/A	turTru2
DNAJC21	8	0	0	odoRosDi,orcOrc1,susScr3,cerSim1,loxAfr3,dasNov3,hetGla2,hg19	#N/A	#N/A
AP4B1-AS1	7	0	0	odoRosDi,orcOrc1,cerSim1,triMan1,dasNov3,hetGla2,hg19	#N/A	#N/A
ACTL6A	3	0	0	cerSim1,loxAfr3,triMan1	#N/A	#N/A
C16orf58	4	0	0	orcOrc1,turTru2,loxAfr3,hetGla2	#N/A	#N/A
C17orf50	5	0	0	odoRosDi,loxAfr3,dasNov3,hetGla2,hg19	#N/A	#N/A
ATP5E	4	1	1	odoRosDi,cerSim1,triMan1,hetGla2	hetGla2	hetGla2
CXCL14	5	0	0	susScr3,cerSim1,triMan1,dasNov3,hetGla2	#N/A	#N/A
FBXO5	8	0	0	odoRosDi,orcOrc1,turTru2,susScr3,triMan1,dasNov3,hetGla2,hg19	#N/A	#N/A
BAZ1A	9	0	0	odoRosDi,orcOrc1,turTru2,susScr3,cerSim1,loxAfr3,triMan1,dasNov3,hg19	#N/A	#N/A
C9orf57	6	0	0	odoRosDi,susScr3,cerSim1,loxAfr3,triMan1,dasNov3	#N/A	#N/A
CYTH2	1	0	0	odoRosDi	#N/A	#N/A
ABI3BP	7	0	1	turTru2,susScr3,cerSim1,loxAfr3,triMan1,dasNov3,hg19	#N/A	hg19
BTG2	3	0	0	odoRosDi,cerSim1,triMan1	#N/A	#N/A
DDX28	8	0	1	odoRosDi,susScr3,cerSim1,loxAfr3,triMan1,dasNov3,hetGla2,hg19	#N/A	cerSim1
ANKRD20A4	4	0	0	susScr3,cerSim1,triMan1,dasNov3	#N/A	#N/A
CACTIN-AS1	2	0	0	turTru2,hg19	#N/A	#N/A
COX7A1	6	0	0	odoRosDi,turTru2,susScr3,cerSim1,loxAfr3,hetGla2	#N/A	#N/A
ASB18	5	0	0	odoRosDi,turTru2,susScr3,hetGla2,hg19	#N/A	#N/A
CMKLR1	5	0	0	odoRosDi,susScr3,cerSim1,hetGla2,hg19	#N/A	#N/A
BC031638	3	0	0	odoRosDi,dasNov3,hetGla2	#N/A	#N/A
BMPR1A	4	0	0	susScr3,cerSim1,loxAfr3,dasNov3	#N/A	#N/A
ARFGAP3	5	0	0	orcOrc1,cerSim1,triMan1,dasNov3,hg19	#N/A	#N/A
C15orf62	7	0	2	odoRosDi,orcOrc1,cerSim1,loxAfr3,triMan1,dasNov3,hetGla2	#N/A	triMan1,hetGla2
ABHD17A	8	0	1	odoRosDi,orcOrc1,turTru2,susScr3,cerSim1,loxAfr3,triMan1,hetGla2	#N/A	turTru2
AQP6	4	0	0	odoRosDi,cerSim1,triMan1,hg19	#N/A	#N/A
CD33	5	0	1	cerSim1,triMan1,dasNov3,hetGla2,hg19	#N/A	cerSim1
AGR3	4	0	0	odoRosDi,cerSim1,dasNov3,hetGla2	#N/A	#N/A
CYB5R1	4	0	0	orcOrc1,cerSim1,triMan1,hetGla2	#N/A	#N/A
COMTD1	4	0	0	odoRosDi,susScr3,cerSim1,triMan1	#N/A	#N/A
CCL26	3	0	0	odoRosDi,cerSim1,hg19	#N/A	#N/A
DBT	9	0	0	odoRosDi,turTru2,susScr3,cerSim1,loxAfr3,triMan1,dasNov3,hetGla2,hg19	#N/A	#N/A
ALG9	6	0	0	odoRosDi,susScr3,loxAfr3,triMan1,dasNov3,hetGla2	#N/A	#N/A
ABCB5	9	0	1	odoRosDi,orcOrc1,turTru2,cerSim1,loxAfr3,triMan1,dasNov3,hetGla2,hg19	#N/A	hg19
C10orf53	1	0	0	susScr3	#N/A	#N/A
APOA2	4	0	0	loxAfr3,triMan1,dasNov3,hetGla2	#N/A	#N/A
FBXO39	6	0	0	odoRosDi,orcOrc1,susScr3,cerSim1,loxAfr3,hg19	#N/A	#N/A
CASP3	4	0	0	turTru2,susScr3,cerSim1,loxAfr3	#N/A	#N/A
ARHGAP26	9	0	0	odoRosDi,orcOrc1,susScr3,cerSim1,loxAfr3,triMan1,dasNov3,hetGla2,hg19	#N/A	#N/A
CLDN4	7	0	0	odoRosDi,susScr3,cerSim1,loxAfr3,triMan1,dasNov3,hetGla2	#N/A	#N/A
ARHGAP10	6	0	1	odoRosDi,turTru2,cerSim1,loxAfr3,triMan1,dasNov3	#N/A	turTru2
DEFB129	5	0	0	odoRosDi,orcOrc1,turTru2,susScr3,dasNov3	#N/A	#N/A
ABCG8	9	1	2	odoRosDi,orcOrc1,turTru2,susScr3,cerSim1,loxAfr3,triMan1,hetGla2,hg19	triMan1	loxAfr3,triMan1
CACTIN	5	0	0	odoRosDi,orcOrc1,dasNov3,hetGla2,hg19	#N/A	#N/A
ASH1L-AS1	4	0	0	turTru2,susScr3,dasNov3,hg19	#N/A	#N/A
DGCR8	7	0	0	odoRosDi,susScr3,cerSim1,loxAfr3,triMan1,dasNov3,hetGla2	#N/A	#N/A
CLDN18	5	0	0	cerSim1,loxAfr3,triMan1,dasNov3,hetGla2	#N/A	#N/A
C17orf72	10	0	1	odoRosDi,orcOrc1,turTru2,susScr3,cerSim1,loxAfr3,triMan1,dasNov3,hetGla2,hg19	#N/A	hg19
CA9	8	0	0	odoRosDi,turTru2,cerSim1,loxAfr3,triMan1,dasNov3,hetGla2,hg19	#N/A	#N/A
APLF	9	0	0	odoRosDi,orcOrc1,susScr3,cerSim1,loxAfr3,triMan1,dasNov3,hetGla2,hg19	#N/A	#N/A
ASAP1-IT1	2	0	0	cerSim1,loxAfr3	#N/A	#N/A
CCDC61	9	0	0	odoRosDi,orcOrc1,turTru2,susScr3,loxAfr3,triMan1,dasNov3,hetGla2,hg19	#N/A	#N/A
ARL4A	4	0	0	cerSim1,loxAfr3,triMan1,hetGla2	#N/A	#N/A
CABP7	0	0	0	#N/A	#N/A	#N/A
DNAJC4	6	0	0	orcOrc1,susScr3,cerSim1,triMan1,dasNov3,hetGla2	#N/A	#N/A
FCER2	6	0	0	odoRosDi,susScr3,cerSim1,triMan1,hetGla2,hg19	#N/A	#N/A
ADRA1B	6	0	0	orcOrc1,turTru2,susScr3,loxAfr3,triMan1,hetGla2	#N/A	#N/A
ARMCX2	8	0	1	odoRosDi,turTru2,susScr3,cerSim1,loxAfr3,triMan1,dasNov3,hetGla2	#N/A	cerSim1
CCNE2	4	0	1	odoRosDi,susScr3,cerSim1,dasNov3	#N/A	cerSim1
C10orf54	5	0	0	cerSim1,triMan1,dasNov3,hetGla2,hg19	#N/A	#N/A
ACTN1	2	0	0	dasNov3,hetGla2	#N/A	#N/A
CTXN3	2	0	1	cerSim1,hg19	#N/A	hg19
ATP5SL	3	0	0	cerSim1,dasNov3,hg19	#N/A	#N/A
AIG1	4	0	0	susScr3,loxAfr3,triMan1,dasNov3	#N/A	#N/A
COPS3	1	1	1	susScr3	susScr3	susScr3
COL10A1	7	1	2	odoRosDi,orcOrc1,susScr3,cerSim1,triMan1,hetGla2,hg19	odoRosDi	odoRosDi,hg19
DLX3	4	0	0	susScr3,cerSim1,triMan1,dasNov3	#N/A	#N/A
ACTR8	4	0	0	susScr3,loxAfr3,triMan1,dasNov3	#N/A	#N/A
CTLA4	4	0	0	odoRosDi,turTru2,triMan1,dasNov3	#N/A	#N/A
AOC3	5	0	0	susScr3,cerSim1,dasNov3,hetGla2,hg19	#N/A	#N/A
ATP5F1	8	0	2	orcOrc1,turTru2,cerSim1,loxAfr3,triMan1,dasNov3,hetGla2,hg19	#N/A	loxAfr3,triMan1
CXCL16	8	0	0	odoRosDi,turTru2,susScr3,cerSim1,loxAfr3,triMan1,hetGla2,hg19	#N/A	#N/A
BC038245	4	0	0	odoRosDi,triMan1,dasNov3,hetGla2	#N/A	#N/A
DHRS7C	6	0	0	odoRosDi,turTru2,cerSim1,loxAfr3,triMan1,hetGla2	#N/A	#N/A
ALG12	8	0	1	odoRosDi,orcOrc1,turTru2,susScr3,loxAfr3,triMan1,dasNov3,hg19	#N/A	dasNov3
FDXACB1	8	0	0	odoRosDi,orcOrc1,turTru2,cerSim1,loxAfr3,triMan1,hetGla2,hg19	#N/A	#N/A
CD44	7	0	0	odoRosDi,orcOrc1,susScr3,cerSim1,loxAfr3,dasNov3,hetGla2	#N/A	#N/A
ATG14	4	0	0	odoRosDi,cerSim1,loxAfr3,hetGla2	#N/A	#N/A
CUL4B	6	0	0	susScr3,cerSim1,loxAfr3,triMan1,dasNov3,hetGla2	#N/A	#N/A
DKK2	6	0	0	susScr3,cerSim1,triMan1,dasNov3,hetGla2,hg19	#N/A	#N/A
ATF5	3	0	0	orcOrc1,susScr3,loxAfr3	#N/A	#N/A
ASAP1	7	0	0	turTru2,cerSim1,loxAfr3,triMan1,dasNov3,hetGla2,hg19	#N/A	#N/A
CCL27	4	0	0	odoRosDi,loxAfr3,dasNov3,hetGla2	#N/A	#N/A
BSX	7	0	0	odoRosDi,orcOrc1,turTru2,susScr3,cerSim1,dasNov3,hetGla2	#N/A	#N/A
DDAH2	5	0	0	orcOrc1,loxAfr3,triMan1,dasNov3,hetGla2	#N/A	#N/A
ADAL	8	0	0	orcOrc1,turTru2,susScr3,cerSim1,loxAfr3,triMan1,dasNov3,hg19	#N/A	#N/A
C14orf119	6	1	1	odoRosDi,susScr3,cerSim1,loxAfr3,triMan1,dasNov3	odoRosDi	odoRosDi
CNFN	6	1	1	orcOrc1,susScr3,cerSim1,triMan1,dasNov3,hetGla2	triMan1	triMan1
CCL13	8	0	0	odoRosDi,orcOrc1,turTru2,susScr3,cerSim1,loxAfr3,dasNov3,hg19	#N/A	#N/A
COX7A2L	4	0	0	cerSim1,triMan1,dasNov3,hetGla2	#N/A	#N/A
DIO1	6	0	0	odoRosDi,susScr3,cerSim1,triMan1,hetGla2,hg19	#N/A	#N/A
CYP4X1	5	0	0	susScr3,loxAfr3,triMan1,hetGla2,hg19	#N/A	#N/A
BLVRB	6	0	0	odoRosDi,susScr3,cerSim1,triMan1,dasNov3,hg19	#N/A	#N/A
CSNK1G3	4	0	0	cerSim1,loxAfr3,dasNov3,hetGla2	#N/A	#N/A
ATG5	3	0	0	susScr3,dasNov3,hetGla2	#N/A	#N/A
BC032415	1	0	0	hg19	#N/A	#N/A
C17orf53	5	0	1	turTru2,cerSim1,loxAfr3,dasNov3,hetGla2	#N/A	hetGla2
BTN2A3P	5	0	0	loxAfr3,triMan1,dasNov3,hetGla2,hg19	#N/A	#N/A
ASH1L	6	0	0	turTru2,susScr3,cerSim1,loxAfr3,dasNov3,hetGla2	#N/A	#N/A
APOL2	4	0	0	triMan1,dasNov3,hetGla2,hg19	#N/A	#N/A
BTG3	5	0	0	susScr3,cerSim1,loxAfr3,dasNov3,hg19	#N/A	#N/A
FBXW5	4	0	0	susScr3,loxAfr3,dasNov3,hg19	#N/A	#N/A
CBWD2	3	1	1	susScr3,loxAfr3,hg19	hg19	hg19
BTBD1	4	0	0	odoRosDi,cerSim1,dasNov3,hetGla2	#N/A	#N/A
CD79B	4	0	0	odoRosDi,cerSim1,triMan1,hetGla2	#N/A	#N/A
CRHR1	6	0	0	susScr3,cerSim1,loxAfr3,triMan1,hetGla2,hg19	#N/A	#N/A
ANGPTL1	5	0	0	susScr3,cerSim1,loxAfr3,hetGla2,hg19	#N/A	#N/A
C12orf57	4	1	1	cerSim1,loxAfr3,triMan1,dasNov3	dasNov3	dasNov3
DDIT3	6	0	0	odoRosDi,turTru2,cerSim1,triMan1,dasNov3,hetGla2	#N/A	#N/A
ASIC5	5	0	0	susScr3,loxAfr3,triMan1,hetGla2,hg19	#N/A	#N/A
COQ2	8	0	0	odoRosDi,orcOrc1,susScr3,loxAfr3,triMan1,dasNov3,hetGla2,hg19	#N/A	#N/A
ARAF	4	0	0	susScr3,cerSim1,dasNov3,hetGla2	#N/A	#N/A
CUBN	10	1	1	odoRosDi,orcOrc1,turTru2,susScr3,cerSim1,loxAfr3,triMan1,dasNov3,hetGla2,hg19	dasNov3	dasNov3
CMTM7	4	0	0	odoRosDi,turTru2,dasNov3,hetGla2	#N/A	#N/A
CAD	7	0	0	orcOrc1,turTru2,loxAfr3,triMan1,dasNov3,hetGla2,hg19	#N/A	#N/A
C11orf82	7	0	0	orcOrc1,turTru2,cerSim1,triMan1,dasNov3,hetGla2,hg19	#N/A	#N/A
COX17	3	0	0	loxAfr3,triMan1,dasNov3	#N/A	#N/A
DNAJB2	3	0	0	odoRosDi,susScr3,cerSim1	#N/A	#N/A
AJAP1	6	1	1	odoRosDi,orcOrc1,triMan1,dasNov3,hetGla2,hg19	dasNov3	dasNov3
ARL6IP5	4	0	0	cerSim1,loxAfr3,triMan1,dasNov3	#N/A	#N/A
AADAT	8	0	1	orcOrc1,turTru2,susScr3,cerSim1,triMan1,dasNov3,hetGla2,hg19	#N/A	hg19
CTSS	5	0	0	turTru2,cerSim1,triMan1,dasNov3,hetGla2	#N/A	#N/A
ADIPOR2	8	0	1	odoRosDi,turTru2,susScr3,cerSim1,loxAfr3,triMan1,dasNov3,hetGla2	#N/A	turTru2
AMY2A	5	0	0	orcOrc1,susScr3,loxAfr3,triMan1,hg19	#N/A	#N/A
FBXO30	6	0	0	turTru2,susScr3,cerSim1,triMan1,dasNov3,hetGla2	#N/A	#N/A
AGPAT4-IT1	2	0	0	odoRosDi,hg19	#N/A	#N/A
C12orf43	9	0	0	odoRosDi,orcOrc1,turTru2,susScr3,cerSim1,loxAfr3,triMan1,dasNov3,hetGla2	#N/A	#N/A
CYP11B2	4	0	0	loxAfr3,triMan1,hetGla2,hg19	#N/A	#N/A
CASR	4	0	0	odoRosDi,cerSim1,triMan1,hg19	#N/A	#N/A
CYP2B7P1	5	0	0	susScr3,cerSim1,dasNov3,hetGla2,hg19	#N/A	#N/A
CNIH3	3	0	0	cerSim1,triMan1,hetGla2	#N/A	#N/A
ANXA7	6	0	0	odoRosDi,orcOrc1,cerSim1,loxAfr3,triMan1,dasNov3	#N/A	#N/A
CLCN6	1	0	0	hetGla2	#N/A	#N/A
C9orf64	3	0	0	odoRosDi,orcOrc1,dasNov3	#N/A	#N/A
CALR3	7	0	1	odoRosDi,turTru2,cerSim1,loxAfr3,triMan1,hetGla2,hg19	#N/A	hetGla2
AGRN	6	0	0	orcOrc1,turTru2,susScr3,loxAfr3,hetGla2,hg19	#N/A	#N/A
AP4B1	6	0	0	odoRosDi,orcOrc1,turTru2,susScr3,hetGla2,hg19	#N/A	#N/A
DIS3L2	7	0	0	susScr3,cerSim1,loxAfr3,triMan1,dasNov3,hetGla2,hg19	#N/A	#N/A
ARL14EPL	6	0	0	odoRosDi,cerSim1,loxAfr3,triMan1,dasNov3,hetGla2	#N/A	#N/A
ASPHD1	7	0	1	odoRosDi,orcOrc1,susScr3,cerSim1,triMan1,dasNov3,hetGla2	#N/A	hetGla2
ASB1	3	0	1	odoRosDi,triMan1,dasNov3	#N/A	triMan1
DNAJC11	5	0	0	odoRosDi,cerSim1,triMan1,dasNov3,hetGla2	#N/A	#N/A
CD5	7	0	0	orcOrc1,turTru2,loxAfr3,triMan1,dasNov3,hetGla2,hg19	#N/A	#N/A
CYP2R1	9	0	0	odoRosDi,orcOrc1,susScr3,cerSim1,loxAfr3,triMan1,dasNov3,hetGla2,hg19	#N/A	#N/A
ADAP1	2	0	0	triMan1,hetGla2	#N/A	#N/A
CCNB1IP1	6	0	2	odoRosDi,cerSim1,loxAfr3,triMan1,dasNov3,hetGla2	#N/A	cerSim1,triMan1
CNGA1	5	0	0	odoRosDi,orcOrc1,cerSim1,hetGla2,hg19	#N/A	#N/A
ACVR2B	4	0	0	susScr3,cerSim1,loxAfr3,dasNov3	#N/A	#N/A
ARL4C	#N/A	#N/A	#N/A	#N/A	#N/A	#N/A
BC039399	4	0	0	odoRosDi,susScr3,cerSim1,hetGla2	#N/A	#N/A
AWAT1	7	1	1	susScr3,cerSim1,loxAfr3,triMan1,dasNov3,hetGla2,hg19	loxAfr3	loxAfr3
BORA	6	0	0	odoRosDi,susScr3,cerSim1,triMan1,dasNov3,hg19	#N/A	#N/A
APOA4	4	0	0	cerSim1,dasNov3,hetGla2,hg19	#N/A	#N/A
CPA2	7	0	0	odoRosDi,susScr3,cerSim1,triMan1,dasNov3,hetGla2,hg19	#N/A	#N/A
CSAD	7	0	0	odoRosDi,cerSim1,loxAfr3,triMan1,dasNov3,hetGla2,hg19	#N/A	#N/A
AGPAT4	5	0	0	odoRosDi,susScr3,cerSim1,triMan1,hg19	#N/A	#N/A
DHPS	5	0	1	cerSim1,loxAfr3,triMan1,hetGla2,hg19	#N/A	hetGla2
CABS1	7	0	0	orcOrc1,turTru2,cerSim1,loxAfr3,triMan1,dasNov3,hg19	#N/A	#N/A
DNASE1L2	7	0	0	odoRosDi,orcOrc1,turTru2,susScr3,cerSim1,loxAfr3,triMan1	#N/A	#N/A
APPL2	6	0	0	odoRosDi,susScr3,cerSim1,triMan1,dasNov3,hetGla2	#N/A	#N/A
CCM2L	9	1	2	odoRosDi,orcOrc1,turTru2,susScr3,cerSim1,loxAfr3,triMan1,dasNov3,hg19	turTru2	turTru2,loxAfr3
CCDC43	1	0	0	triMan1	#N/A	#N/A
COX18	4	0	0	odoRosDi,cerSim1,loxAfr3,triMan1	#N/A	#N/A
CBY1	3	0	1	triMan1,dasNov3,hetGla2	#N/A	hetGla2
DDX19B	2	0	0	cerSim1,dasNov3	#N/A	#N/A
ARHGEF40	8	1	2	odoRosDi,orcOrc1,turTru2,susScr3,cerSim1,loxAfr3,triMan1,hg19	turTru2	turTru2,hg19
AEBP2	5	0	0	turTru2,susScr3,loxAfr3,triMan1,hetGla2	#N/A	#N/A
DDX49	6	0	0	odoRosDi,turTru2,susScr3,cerSim1,triMan1,hetGla2	#N/A	#N/A
DNAAF2	7	0	0	odoRosDi,orcOrc1,loxAfr3,triMan1,dasNov3,hetGla2,hg19	#N/A	#N/A
DERA	7	0	0	odoRosDi,turTru2,cerSim1,loxAfr3,triMan1,hetGla2,hg19	#N/A	#N/A
CXXC11	6	0	0	odoRosDi,turTru2,loxAfr3,triMan1,hetGla2,hg19	#N/A	#N/A
C12orf5	3	0	0	cerSim1,triMan1,hetGla2	#N/A	#N/A
DLGAP2	6	0	0	odoRosDi,susScr3,cerSim1,loxAfr3,hetGla2,hg19	#N/A	#N/A
CMTM8	4	0	0	orcOrc1,cerSim1,triMan1,hetGla2	#N/A	#N/A
ABHD17B	2	0	0	susScr3,cerSim1	#N/A	#N/A
CLDN5	5	0	0	odoRosDi,cerSim1,loxAfr3,dasNov3,hetGla2	#N/A	#N/A
ACP5	5	0	0	odoRosDi,cerSim1,loxAfr3,triMan1,hg19	#N/A	#N/A
CLDN19	6	0	0	odoRosDi,orcOrc1,cerSim1,loxAfr3,triMan1,hetGla2	#N/A	#N/A
BMP2K	8	0	0	odoRosDi,orcOrc1,turTru2,cerSim1,loxAfr3,triMan1,dasNov3,hetGla2	#N/A	#N/A
ARID3A	6	1	1	odoRosDi,susScr3,loxAfr3,triMan1,dasNov3,hetGla2	triMan1	triMan1
CXCR2P1	6	0	0	susScr3,cerSim1,loxAfr3,triMan1,hetGla2,hg19	#N/A	#N/A
ACOT7	5	0	0	turTru2,susScr3,triMan1,dasNov3,hetGla2	#N/A	#N/A
ACSF2	4	0	0	odoRosDi,susScr3,cerSim1,hg19	#N/A	#N/A
C14orf166	3	0	0	odoRosDi,cerSim1,dasNov3	#N/A	#N/A
CYP4B1	4	0	0	susScr3,triMan1,dasNov3,hg19	#N/A	#N/A
ARL6IP6	4	0	0	odoRosDi,susScr3,cerSim1,triMan1	#N/A	#N/A
C11orf35	4	0	0	odoRosDi,turTru2,triMan1,hg19	#N/A	#N/A
CCPG1	7	0	1	odoRosDi,turTru2,susScr3,cerSim1,triMan1,dasNov3,hetGla2	#N/A	hetGla2
DEGS2	7	0	1	odoRosDi,turTru2,cerSim1,loxAfr3,triMan1,dasNov3,hetGla2	#N/A	cerSim1
ABCA4	8	0	0	odoRosDi,turTru2,susScr3,cerSim1,loxAfr3,triMan1,hetGla2,hg19	#N/A	#N/A
AIM1L	5	0	0	orcOrc1,cerSim1,loxAfr3,hetGla2,hg19	#N/A	#N/A
ARRB1	4	0	0	odoRosDi,susScr3,dasNov3,hetGla2	#N/A	#N/A
DHX58	7	0	0	odoRosDi,susScr3,cerSim1,loxAfr3,triMan1,hetGla2,hg19	#N/A	#N/A
CA2	6	1	1	turTru2,susScr3,cerSim1,loxAfr3,dasNov3,hg19	cerSim1	cerSim1
C14orf132	3	0	0	susScr3,dasNov3,hetGla2	#N/A	#N/A
DFNA5	9	0	0	odoRosDi,orcOrc1,turTru2,susScr3,cerSim1,loxAfr3,triMan1,hetGla2,hg19	#N/A	#N/A
C16orf11	8	0	0	orcOrc1,turTru2,susScr3,loxAfr3,triMan1,dasNov3,hetGla2,hg19	#N/A	#N/A
CAMK2A	#N/A	#N/A	#N/A	#N/A	#N/A	#N/A
COPS4	3	0	0	cerSim1,triMan1,hetGla2	#N/A	#N/A
CTBP1	#N/A	#N/A	#N/A	#N/A	#N/A	#N/A
ACTL6B	1	0	0	hetGla2	#N/A	#N/A
ADGB	9	0	0	odoRosDi,orcOrc1,turTru2,cerSim1,loxAfr3,triMan1,dasNov3,hetGla2,hg19	#N/A	#N/A
AV1S4A1N1T	2	1	1	susScr3,cerSim1	cerSim1	cerSim1
AK7	5	0	2	turTru2,susScr3,cerSim1,loxAfr3,hg19	#N/A	cerSim1,hg19
CPNE5	4	0	0	susScr3,triMan1,dasNov3,hetGla2	#N/A	#N/A
CNIH4	4	0	0	turTru2,dasNov3,hetGla2,hg19	#N/A	#N/A
BTG4	5	0	0	odoRosDi,susScr3,cerSim1,triMan1,hetGla2	#N/A	#N/A
CCT6B	7	0	1	odoRosDi,cerSim1,loxAfr3,triMan1,dasNov3,hetGla2,hg19	#N/A	hetGla2
AASDH	7	0	0	turTru2,cerSim1,loxAfr3,triMan1,dasNov3,hetGla2,hg19	#N/A	#N/A
ADCY4	7	0	0	odoRosDi,orcOrc1,turTru2,susScr3,loxAfr3,dasNov3,hetGla2	#N/A	#N/A
BC040304	4	0	0	odoRosDi,turTru2,susScr3,triMan1	#N/A	#N/A
CD2BP2	7	0	1	odoRosDi,susScr3,cerSim1,loxAfr3,triMan1,dasNov3,hg19	#N/A	hg19
DEFB130	2	0	0	cerSim1,loxAfr3	#N/A	#N/A
CAPN9	4	0	0	cerSim1,loxAfr3,triMan1,dasNov3	#N/A	#N/A
CD34	6	0	0	odoRosDi,susScr3,cerSim1,loxAfr3,triMan1,hg19	#N/A	#N/A
DLX4	5	0	0	odoRosDi,cerSim1,loxAfr3,triMan1,hetGla2	#N/A	#N/A
FFAR1	7	0	0	turTru2,susScr3,cerSim1,loxAfr3,triMan1,dasNov3,hg19	#N/A	#N/A
CCDC6	3	0	0	turTru2,cerSim1,triMan1	#N/A	#N/A
COMT	5	0	0	odoRosDi,turTru2,susScr3,triMan1,dasNov3	#N/A	#N/A
DDB1	2	0	0	odoRosDi,hetGla2	#N/A	#N/A
ATF6B	7	0	0	odoRosDi,cerSim1,loxAfr3,triMan1,dasNov3,hetGla2,hg19	#N/A	#N/A
DGKK	7	0	1	odoRosDi,orcOrc1,susScr3,cerSim1,loxAfr3,triMan1,hg19	#N/A	cerSim1
CCDC108	8	0	0	orcOrc1,turTru2,susScr3,cerSim1,loxAfr3,triMan1,hetGla2,hg19	#N/A	#N/A
ARL4D	0	0	0	#N/A	#N/A	#N/A
ALKBH1	8	0	0	odoRosDi,turTru2,susScr3,cerSim1,loxAfr3,triMan1,dasNov3,hetGla2	#N/A	#N/A
BOC	6	0	0	odoRosDi,orcOrc1,cerSim1,triMan1,dasNov3,hg19	#N/A	#N/A
AMBRA1	5	0	0	susScr3,cerSim1,triMan1,dasNov3,hg19	#N/A	#N/A
CCBL1	6	0	0	susScr3,cerSim1,triMan1,dasNov3,hetGla2,hg19	#N/A	#N/A
ANKRD34C	5	0	0	odoRosDi,susScr3,triMan1,hetGla2,hg19	#N/A	#N/A
CCDC33	9	0	0	odoRosDi,orcOrc1,turTru2,cerSim1,loxAfr3,triMan1,dasNov3,hetGla2,hg19	#N/A	#N/A
DIO2	6	0	0	odoRosDi,turTru2,susScr3,cerSim1,triMan1,dasNov3	#N/A	#N/A
ATP5G1	6	0	0	odoRosDi,susScr3,loxAfr3,triMan1,dasNov3,hetGla2	#N/A	#N/A
ADRBK2	4	0	0	susScr3,loxAfr3,triMan1,dasNov3	#N/A	#N/A
BTAF1	6	0	0	odoRosDi,turTru2,susScr3,cerSim1,loxAfr3,dasNov3	#N/A	#N/A
FCHO1	6	0	1	odoRosDi,turTru2,susScr3,triMan1,dasNov3,hetGla2	#N/A	dasNov3
C10orf90	6	0	0	orcOrc1,turTru2,susScr3,triMan1,dasNov3,hetGla2	#N/A	#N/A
AQP7	7	0	0	odoRosDi,turTru2,cerSim1,triMan1,dasNov3,hetGla2,hg19	#N/A	#N/A
CAMKMT	8	0	0	turTru2,susScr3,cerSim1,loxAfr3,triMan1,dasNov3,hetGla2,hg19	#N/A	#N/A
CPQ	8	0	0	odoRosDi,orcOrc1,turTru2,susScr3,triMan1,dasNov3,hetGla2,hg19	#N/A	#N/A
CNP	7	1	1	odoRosDi,susScr3,cerSim1,loxAfr3,triMan1,dasNov3,hetGla2	cerSim1	cerSim1
DCP2	6	0	0	odoRosDi,loxAfr3,triMan1,dasNov3,hetGla2,hg19	#N/A	#N/A
ARL14EP	2	0	0	triMan1,dasNov3	#N/A	#N/A
BPIFB3	7	0	0	odoRosDi,susScr3,cerSim1,loxAfr3,triMan1,hetGla2,hg19	#N/A	#N/A
CCNL1	3	0	0	susScr3,cerSim1,dasNov3	#N/A	#N/A
BRIX1	8	0	0	odoRosDi,turTru2,susScr3,cerSim1,loxAfr3,triMan1,dasNov3,hetGla2	#N/A	#N/A
ADAP2	7	0	0	susScr3,cerSim1,loxAfr3,triMan1,dasNov3,hetGla2,hg19	#N/A	#N/A
CYTH3	0	0	0	#N/A	#N/A	#N/A
CALCOCO2	6	0	0	cerSim1,loxAfr3,triMan1,dasNov3,hetGla2,hg19	#N/A	#N/A
ART4	8	0	0	odoRosDi,orcOrc1,turTru2,cerSim1,triMan1,dasNov3,hetGla2,hg19	#N/A	#N/A
ANTXR1	4	0	0	susScr3,triMan1,dasNov3,hetGla2	#N/A	#N/A
ABCD4	8	0	0	odoRosDi,turTru2,susScr3,cerSim1,loxAfr3,triMan1,hetGla2,hg19	#N/A	#N/A
ALS2CR11	10	0	0	odoRosDi,orcOrc1,turTru2,susScr3,cerSim1,loxAfr3,triMan1,dasNov3,hetGla2,hg19	#N/A	#N/A
CCDC94	5	0	0	turTru2,cerSim1,loxAfr3,triMan1,dasNov3	#N/A	#N/A
DKK3	4	0	0	odoRosDi,triMan1,dasNov3,hg19	#N/A	#N/A
CYB5R2	7	0	0	odoRosDi,orcOrc1,turTru2,cerSim1,loxAfr3,triMan1,hg19	#N/A	#N/A
CCL14	7	0	0	odoRosDi,orcOrc1,turTru2,susScr3,dasNov3,hetGla2,hg19	#N/A	#N/A
DDIT4L	5	0	1	susScr3,cerSim1,triMan1,dasNov3,hetGla2	#N/A	hetGla2
CASP4	5	0	0	susScr3,cerSim1,triMan1,hetGla2,hg19	#N/A	#N/A
AEN	9	0	0	odoRosDi,orcOrc1,susScr3,cerSim1,loxAfr3,triMan1,dasNov3,hetGla2,hg19	#N/A	#N/A
ARHGAP18	8	0	0	odoRosDi,orcOrc1,susScr3,cerSim1,triMan1,dasNov3,hetGla2,hg19	#N/A	#N/A
CCDC62	8	0	0	odoRosDi,orcOrc1,susScr3,cerSim1,loxAfr3,triMan1,hetGla2,hg19	#N/A	#N/A
CAMTA1	4	0	0	cerSim1,loxAfr3,triMan1,dasNov3	#N/A	#N/A
DHRS7	8	0	1	odoRosDi,turTru2,susScr3,cerSim1,loxAfr3,triMan1,dasNov3,hetGla2	#N/A	dasNov3
BLZF1	7	0	0	odoRosDi,susScr3,cerSim1,loxAfr3,dasNov3,hetGla2,hg19	#N/A	#N/A
CMYA5	9	0	0	odoRosDi,orcOrc1,turTru2,cerSim1,loxAfr3,triMan1,dasNov3,hetGla2,hg19	#N/A	#N/A
C14orf169	6	0	1	susScr3,cerSim1,loxAfr3,triMan1,dasNov3,hg19	#N/A	hg19
C16orf87	3	0	0	triMan1,dasNov3,hetGla2	#N/A	#N/A
C1orf105	6	0	0	odoRosDi,orcOrc1,turTru2,loxAfr3,triMan1,dasNov3	#N/A	#N/A
CBLL1	4	0	0	susScr3,cerSim1,triMan1,hetGla2	#N/A	#N/A
ATG7	6	0	1	odoRosDi,susScr3,loxAfr3,triMan1,hetGla2,hg19	#N/A	hg19
ATP5S	7	0	0	odoRosDi,cerSim1,loxAfr3,triMan1,dasNov3,hetGla2,hg19	#N/A	#N/A
CNIH	#N/A	#N/A	#N/A	#N/A	#N/A	#N/A
FCF1	1	0	0	susScr3	#N/A	#N/A
FCRL5	7	0	0	odoRosDi,orcOrc1,turTru2,susScr3,dasNov3,hetGla2,hg19	#N/A	#N/A
CXCR2	6	0	0	odoRosDi,susScr3,cerSim1,loxAfr3,triMan1,hetGla2	#N/A	#N/A
CRNN	5	0	0	odoRosDi,cerSim1,triMan1,hetGla2,hg19	#N/A	#N/A
ANAPC2	3	0	0	odoRosDi,loxAfr3,dasNov3	#N/A	#N/A
ANKRD45	6	0	0	odoRosDi,orcOrc1,susScr3,cerSim1,triMan1,hetGla2	#N/A	#N/A
av27s1	2	0	0	susScr3,cerSim1	#N/A	#N/A
C10orf11	6	0	1	odoRosDi,turTru2,cerSim1,dasNov3,hetGla2,hg19	#N/A	hetGla2
DBX1	6	0	0	turTru2,susScr3,cerSim1,loxAfr3,triMan1,hetGla2	#N/A	#N/A
ANKRD62	5	0	0	susScr3,cerSim1,triMan1,dasNov3,hg19	#N/A	#N/A
C17orf74	8	0	0	odoRosDi,orcOrc1,turTru2,susScr3,loxAfr3,triMan1,hetGla2,hg19	#N/A	#N/A
CBY3	7	0	0	turTru2,susScr3,cerSim1,loxAfr3,triMan1,dasNov3,hg19	#N/A	#N/A
ANGPTL2	4	0	0	odoRosDi,susScr3,hetGla2,hg19	#N/A	#N/A
CSTF3	3	1	1	susScr3,cerSim1,dasNov3	susScr3	susScr3
ACP6	5	0	0	odoRosDi,orcOrc1,turTru2,susScr3,hetGla2	#N/A	#N/A
ALOXE3	6	0	1	odoRosDi,orcOrc1,turTru2,susScr3,hetGla2,hg19	#N/A	orcOrc1
CREBBP	8	0	0	odoRosDi,orcOrc1,turTru2,cerSim1,loxAfr3,triMan1,hetGla2,hg19	#N/A	#N/A
C16orf59	5	0	0	odoRosDi,turTru2,loxAfr3,hetGla2,hg19	#N/A	#N/A
BC040860	6	0	0	odoRosDi,turTru2,susScr3,loxAfr3,triMan1,hg19	#N/A	#N/A
ASB2	7	0	1	odoRosDi,turTru2,susScr3,cerSim1,loxAfr3,triMan1,dasNov3	#N/A	triMan1
CYP17A1	8	0	0	odoRosDi,turTru2,susScr3,loxAfr3,triMan1,dasNov3,hetGla2,hg19	#N/A	#N/A
DNAJC5B	5	0	0	odoRosDi,susScr3,cerSim1,loxAfr3,hetGla2	#N/A	#N/A
AMOTL2	5	0	0	susScr3,cerSim1,loxAfr3,dasNov3,hetGla2	#N/A	#N/A
CTNNA1	4	0	0	odoRosDi,cerSim1,loxAfr3,dasNov3	#N/A	#N/A
CBWD3	1	0	0	hg19	#N/A	#N/A
ENTPD6	9	3	3	orcOrc1,turTru2,susScr3,cerSim1,loxAfr3,triMan1,dasNov3,hetGla2,hg19	orcOrc1,turTru2,cerSim1	orcOrc1,turTru2,cerSim1
CPE	2	0	0	odoRosDi,turTru2	#N/A	#N/A
ACSM4	5	0	1	susScr3,loxAfr3,triMan1,dasNov3,hg19	#N/A	susScr3
ARL6	2	0	0	cerSim1,dasNov3	#N/A	#N/A
COQ3	7	0	0	odoRosDi,susScr3,cerSim1,loxAfr3,triMan1,dasNov3,hg19	#N/A	#N/A
ARL5A	0	0	0	#N/A	#N/A	#N/A
ATP5G2	3	0	0	turTru2,cerSim1,hetGla2	#N/A	#N/A
ANO4	6	0	0	turTru2,susScr3,cerSim1,loxAfr3,triMan1,dasNov3	#N/A	#N/A
CCRL2	7	0	0	odoRosDi,susScr3,loxAfr3,triMan1,dasNov3,hetGla2,hg19	#N/A	#N/A
ACTL7A	6	0	0	odoRosDi,susScr3,cerSim1,loxAfr3,hetGla2,hg19	#N/A	#N/A
DAZ1	4	0	0	susScr3,cerSim1,triMan1,hg19	#N/A	#N/A
CNTRL	9	0	0	odoRosDi,turTru2,susScr3,cerSim1,loxAfr3,triMan1,dasNov3,hetGla2,hg19	#N/A	#N/A
CCNB1	6	0	1	odoRosDi,susScr3,cerSim1,triMan1,hetGla2,hg19	#N/A	cerSim1
COMMD10	4	0	0	susScr3,triMan1,dasNov3,hg19	#N/A	#N/A
DMTF1	6	0	1	odoRosDi,susScr3,cerSim1,triMan1,dasNov3,hetGla2	#N/A	hetGla2
ASTL	4	0	0	odoRosDi,turTru2,cerSim1,hg19	#N/A	#N/A
ADAMTS5	4	0	0	odoRosDi,loxAfr3,triMan1,hetGla2	#N/A	#N/A
CLDN1	6	1	1	susScr3,cerSim1,loxAfr3,triMan1,dasNov3,hetGla2	dasNov3	dasNov3
DAAM2	7	0	0	odoRosDi,turTru2,cerSim1,loxAfr3,triMan1,dasNov3,hetGla2	#N/A	#N/A
CCDC79	7	0	0	odoRosDi,orcOrc1,turTru2,triMan1,dasNov3,hetGla2,hg19	#N/A	#N/A
BICD2	7	0	0	orcOrc1,turTru2,susScr3,cerSim1,triMan1,dasNov3,hetGla2	#N/A	#N/A
CDC34	2	0	0	odoRosDi,hetGla2	#N/A	#N/A
CYP2C19	6	0	1	susScr3,cerSim1,loxAfr3,triMan1,hetGla2,hg19	#N/A	hg19
ANKRD20A5P	3	0	0	loxAfr3,triMan1,hg19	#N/A	#N/A
DLX5	2	0	0	triMan1,dasNov3	#N/A	#N/A
CLUL1	6	0	0	odoRosDi,turTru2,cerSim1,loxAfr3,triMan1,hetGla2	#N/A	#N/A
FBXW7	2	0	0	dasNov3,hetGla2	#N/A	#N/A
ADIRF	2	0	0	odoRosDi,hetGla2	#N/A	#N/A
C10orf55	7	0	0	turTru2,cerSim1,loxAfr3,triMan1,dasNov3,hetGla2,hg19	#N/A	#N/A
C1orf131	9	0	0	odoRosDi,orcOrc1,turTru2,susScr3,loxAfr3,triMan1,dasNov3,hetGla2,hg19	#N/A	#N/A
ARFGEF1	4	0	0	susScr3,cerSim1,triMan1,dasNov3	#N/A	#N/A
AGPAT5	5	0	0	cerSim1,loxAfr3,triMan1,dasNov3,hetGla2	#N/A	#N/A
AMY2B	5	0	0	odoRosDi,susScr3,cerSim1,triMan1,hetGla2	#N/A	#N/A
ABHD17C	1	0	0	susScr3	#N/A	#N/A
CD7	3	0	0	cerSim1,loxAfr3,hg19	#N/A	#N/A
CDA	5	0	0	odoRosDi,susScr3,cerSim1,loxAfr3,hetGla2	#N/A	#N/A
CRHR2	5	0	0	odoRosDi,cerSim1,dasNov3,hetGla2,hg19	#N/A	#N/A
BAI3	6	0	0	odoRosDi,cerSim1,loxAfr3,triMan1,hetGla2,hg19	#N/A	#N/A
ATP6V0A4	10	0	0	odoRosDi,orcOrc1,turTru2,susScr3,cerSim1,loxAfr3,triMan1,dasNov3,hetGla2,hg19	#N/A	#N/A
CAMK2B	5	0	0	odoRosDi,turTru2,cerSim1,loxAfr3,triMan1	#N/A	#N/A
ARL14	7	0	0	susScr3,cerSim1,loxAfr3,triMan1,dasNov3,hetGla2,hg19	#N/A	#N/A
CCDC47	4	0	0	cerSim1,loxAfr3,triMan1,dasNov3	#N/A	#N/A
ACTN2	7	0	0	odoRosDi,susScr3,cerSim1,loxAfr3,triMan1,dasNov3,hetGla2	#N/A	#N/A
CAPN12	4	0	0	orcOrc1,turTru2,susScr3,dasNov3	#N/A	#N/A
ADAMTS14	9	0	0	odoRosDi,orcOrc1,turTru2,susScr3,cerSim1,loxAfr3,triMan1,dasNov3,hetGla2	#N/A	#N/A
CNKSR1	3	0	0	triMan1,hetGla2,hg19	#N/A	#N/A
CXCL17	6	0	0	odoRosDi,cerSim1,triMan1,dasNov3,hetGla2,hg19	#N/A	#N/A
ADAM10	6	1	1	turTru2,susScr3,cerSim1,loxAfr3,triMan1,hetGla2	triMan1	triMan1
BRD9	4	0	0	cerSim1,loxAfr3,triMan1,dasNov3	#N/A	#N/A
CTBP2	5	0	0	odoRosDi,cerSim1,loxAfr3,dasNov3,hg19	#N/A	#N/A
BMPR1B	7	0	0	odoRosDi,susScr3,cerSim1,triMan1,dasNov3,hetGla2,hg19	#N/A	#N/A
ACOT8	7	0	1	odoRosDi,cerSim1,loxAfr3,triMan1,dasNov3,hetGla2,hg19	#N/A	triMan1
DHX30	4	0	1	turTru2,dasNov3,hetGla2,hg19	#N/A	dasNov3
C16orf89	6	0	0	odoRosDi,cerSim1,loxAfr3,dasNov3,hetGla2,hg19	#N/A	#N/A
C14orf39	6	0	0	orcOrc1,turTru2,cerSim1,dasNov3,hetGla2,hg19	#N/A	#N/A
COPS5	0	0	0	#N/A	#N/A	#N/A
FBXO3	2	0	0	dasNov3,hetGla2	#N/A	#N/A
CCDC117	7	1	2	turTru2,cerSim1,loxAfr3,triMan1,dasNov3,hetGla2,hg19	hg19	turTru2,hg19
CBWD6	3	1	1	susScr3,loxAfr3,hg19	hg19	hg19
ANKRD20A8P	6	0	0	susScr3,cerSim1,triMan1,dasNov3,hetGla2,hg19	#N/A	#N/A
ATG16L1	5	0	0	susScr3,loxAfr3,triMan1,dasNov3,hetGla2	#N/A	#N/A
ASIP	7	0	0	odoRosDi,turTru2,susScr3,loxAfr3,dasNov3,hetGla2,hg19	#N/A	#N/A
DNAJB3	5	0	0	susScr3,cerSim1,loxAfr3,dasNov3,hg19	#N/A	#N/A
DDX4	7	0	0	orcOrc1,susScr3,cerSim1,loxAfr3,triMan1,dasNov3,hetGla2	#N/A	#N/A
CCL15	3	0	1	loxAfr3,hetGla2,hg19	#N/A	hg19
CTSD	5	0	0	odoRosDi,turTru2,loxAfr3,triMan1,hetGla2	#N/A	#N/A
CARNS1	8	0	0	odoRosDi,turTru2,cerSim1,loxAfr3,triMan1,dasNov3,hetGla2,hg19	#N/A	#N/A
ACVRL1	7	0	0	odoRosDi,turTru2,susScr3,cerSim1,loxAfr3,triMan1,dasNov3	#N/A	#N/A
ADRA1D	4	0	0	odoRosDi,susScr3,loxAfr3,triMan1	#N/A	#N/A
CWC25	5	0	1	odoRosDi,susScr3,loxAfr3,dasNov3,hetGla2	#N/A	hetGla2
C12orf60	5	0	0	odoRosDi,orcOrc1,loxAfr3,triMan1,hetGla2	#N/A	#N/A
FCGBP	3	0	0	cerSim1,dasNov3,hg19	#N/A	#N/A
AP2B1	4	0	1	orcOrc1,turTru2,cerSim1,hetGla2	#N/A	orcOrc1
DHRS11	5	0	0	susScr3,cerSim1,triMan1,dasNov3,hetGla2	#N/A	#N/A
DDX11L11	2	0	0	cerSim1,loxAfr3	#N/A	#N/A
ACCS	8	0	0	odoRosDi,orcOrc1,susScr3,cerSim1,loxAfr3,triMan1,hetGla2,hg19	#N/A	#N/A
CAAP1	4	0	0	cerSim1,loxAfr3,dasNov3,hetGla2	#N/A	#N/A
AGXT	9	0	0	odoRosDi,orcOrc1,turTru2,susScr3,cerSim1,loxAfr3,dasNov3,hetGla2,hg19	#N/A	#N/A
AJUBA	1	0	0	cerSim1	#N/A	#N/A
A2M	8	0	0	odoRosDi,turTru2,susScr3,cerSim1,loxAfr3,triMan1,hetGla2,hg19	#N/A	#N/A
DERL1	1	0	1	dasNov3	#N/A	dasNov3
COL4A6	5	0	0	turTru2,triMan1,dasNov3,hetGla2,hg19	#N/A	#N/A
ADK	6	0	0	susScr3,cerSim1,loxAfr3,triMan1,dasNov3,hetGla2	#N/A	#N/A
ADCK3	6	0	2	odoRosDi,turTru2,susScr3,cerSim1,loxAfr3,hetGla2	#N/A	susScr3,cerSim1
C10orf120	5	0	0	turTru2,cerSim1,loxAfr3,triMan1,dasNov3	#N/A	#N/A
DIO3AS	4	0	0	loxAfr3,triMan1,dasNov3,hetGla2	#N/A	#N/A
CNTD1	4	0	1	cerSim1,loxAfr3,dasNov3,hetGla2	#N/A	hetGla2
CSNK2A1	4	0	0	turTru2,triMan1,dasNov3,hetGla2	#N/A	#N/A
APOL3	5	0	0	orcOrc1,turTru2,cerSim1,loxAfr3,hg19	#N/A	#N/A
C1orf172	8	0	0	odoRosDi,orcOrc1,cerSim1,loxAfr3,triMan1,dasNov3,hetGla2,hg19	#N/A	#N/A
CSF3	6	0	0	orcOrc1,cerSim1,triMan1,dasNov3,hetGla2,hg19	#N/A	#N/A
CLDN6	7	1	1	odoRosDi,susScr3,cerSim1,loxAfr3,triMan1,dasNov3,hetGla2	susScr3	susScr3
DNASE1L3	9	0	0	odoRosDi,orcOrc1,turTru2,susScr3,cerSim1,loxAfr3,dasNov3,hetGla2,hg19	#N/A	#N/A
C9orf66	4	1	1	turTru2,susScr3,cerSim1,hg19	hg19	hg19
DDX11L1	4	0	0	cerSim1,loxAfr3,triMan1,hg19	#N/A	#N/A
ABHD1	9	0	0	odoRosDi,orcOrc1,turTru2,susScr3,cerSim1,loxAfr3,triMan1,hetGla2,hg19	#N/A	#N/A
AMER2	4	0	0	susScr3,triMan1,dasNov3,hg19	#N/A	#N/A
CD1A	2	0	1	odoRosDi,hg19	#N/A	hg19
CACUL1	4	0	0	odoRosDi,susScr3,dasNov3,hg19	#N/A	#N/A
AV2S1A1	3	0	0	dasNov3,hetGla2,hg19	#N/A	#N/A
CCDC150	8	0	0	turTru2,susScr3,cerSim1,loxAfr3,triMan1,dasNov3,hetGla2,hg19	#N/A	#N/A
C1orf106	4	0	0	odoRosDi,turTru2,cerSim1,dasNov3	#N/A	#N/A
ACTRT1	6	0	1	turTru2,susScr3,cerSim1,loxAfr3,triMan1,hetGla2	#N/A	hetGla2
ARL8A	#N/A	#N/A	#N/A	#N/A	#N/A	#N/A
CTSW	6	0	0	odoRosDi,susScr3,cerSim1,loxAfr3,triMan1,hg19	#N/A	#N/A
CD2	7	0	1	turTru2,susScr3,cerSim1,loxAfr3,dasNov3,hetGla2,hg19	#N/A	hg19
CRISPLD1	7	0	1	odoRosDi,cerSim1,loxAfr3,triMan1,dasNov3,hetGla2,hg19	#N/A	triMan1
COPA	5	0	0	odoRosDi,susScr3,dasNov3,hetGla2,hg19	#N/A	#N/A
FBXO6	4	0	0	turTru2,cerSim1,hetGla2,hg19	#N/A	#N/A
AAED1	7	0	0	odoRosDi,susScr3,loxAfr3,triMan1,dasNov3,hetGla2,hg19	#N/A	#N/A
ARAP1	6	0	0	odoRosDi,orcOrc1,cerSim1,triMan1,dasNov3,hetGla2	#N/A	#N/A
FFAR2	5	0	0	odoRosDi,susScr3,loxAfr3,dasNov3,hetGla2	#N/A	#N/A
ATP6AP1L	8	0	0	odoRosDi,orcOrc1,turTru2,cerSim1,loxAfr3,triMan1,dasNov3,hetGla2	#N/A	#N/A
C12orf44	1	0	0	dasNov3	#N/A	#N/A
CNNM3	1	0	0	hetGla2	#N/A	#N/A
ARRB2	7	0	0	turTru2,susScr3,cerSim1,loxAfr3,triMan1,dasNov3,hetGla2	#N/A	#N/A
DDX11L2	3	0	0	loxAfr3,triMan1,hg19	#N/A	#N/A
BTBD2	1	0	0	hetGla2	#N/A	#N/A
EPHA3	8	1	1	odoRosDi,susScr3,cerSim1,loxAfr3,triMan1,dasNov3,hetGla2,hg19	cerSim1	cerSim1
EPHB6	4	0	0	orcOrc1,cerSim1,hetGla2,hg19	#N/A	#N/A
DDIT4	5	0	0	orcOrc1,cerSim1,triMan1,dasNov3,hg19	#N/A	#N/A
ASPHD2	5	0	0	odoRosDi,susScr3,cerSim1,dasNov3,hetGla2	#N/A	#N/A
DNAJC5G	5	0	0	odoRosDi,orcOrc1,turTru2,loxAfr3,hg19	#N/A	#N/A
DNAJC22	7	0	2	odoRosDi,orcOrc1,turTru2,susScr3,cerSim1,triMan1,hetGla2	#N/A	orcOrc1,triMan1
BC049825	5	0	0	cerSim1,loxAfr3,triMan1,dasNov3,hetGla2	#N/A	#N/A
CYTH4	4	0	0	odoRosDi,susScr3,triMan1,dasNov3	#N/A	#N/A
CCDC70	5	0	0	orcOrc1,turTru2,cerSim1,loxAfr3,dasNov3	#N/A	#N/A
ARHGAP27	6	0	0	odoRosDi,susScr3,cerSim1,triMan1,dasNov3,hetGla2	#N/A	#N/A
EPO	4	0	0	susScr3,cerSim1,triMan1,dasNov3	#N/A	#N/A
ANXA8L2	4	0	1	susScr3,cerSim1,dasNov3,hg19	#N/A	dasNov3
COMMD1	7	0	0	odoRosDi,susScr3,cerSim1,loxAfr3,triMan1,dasNov3,hetGla2	#N/A	#N/A
CLDN20	3	0	0	odoRosDi,loxAfr3,dasNov3	#N/A	#N/A
ABRACL	3	0	0	cerSim1,triMan1,dasNov3	#N/A	#N/A
AWAT2	6	0	0	odoRosDi,orcOrc1,susScr3,cerSim1,loxAfr3,triMan1	#N/A	#N/A
CDC37L1	4	0	0	loxAfr3,triMan1,dasNov3,hg19	#N/A	#N/A
ARL8B	#N/A	#N/A	#N/A	#N/A	#N/A	#N/A
ASCC3	7	0	2	odoRosDi,orcOrc1,cerSim1,loxAfr3,triMan1,hetGla2,hg19	#N/A	loxAfr3,triMan1
CMPK1	5	0	1	odoRosDi,susScr3,cerSim1,loxAfr3,hetGla2	#N/A	loxAfr3
ANKS1B	9	0	0	orcOrc1,turTru2,susScr3,cerSim1,loxAfr3,triMan1,dasNov3,hetGla2,hg19	#N/A	#N/A
ATP5G3	2	0	0	cerSim1,triMan1	#N/A	#N/A
CDC123	5	0	0	odoRosDi,susScr3,loxAfr3,triMan1,hg19	#N/A	#N/A
AV4S1	3	0	0	susScr3,cerSim1,triMan1	#N/A	#N/A
CCDC160	7	0	0	odoRosDi,turTru2,cerSim1,triMan1,dasNov3,hetGla2,hg19	#N/A	#N/A
CA3	6	0	0	susScr3,cerSim1,triMan1,dasNov3,hetGla2,hg19	#N/A	#N/A
COL11A1	8	0	0	odoRosDi,turTru2,susScr3,loxAfr3,triMan1,dasNov3,hetGla2,hg19	#N/A	#N/A
CXCL1	6	0	1	odoRosDi,turTru2,cerSim1,triMan1,dasNov3,hetGla2	#N/A	dasNov3
DCPS	5	0	2	odoRosDi,susScr3,cerSim1,triMan1,dasNov3	#N/A	cerSim1,triMan1
FGF17	2	0	0	triMan1,dasNov3	#N/A	#N/A
CCDC96	4	0	0	turTru2,susScr3,hetGla2,hg19	#N/A	#N/A
CCDC172	7	0	0	orcOrc1,turTru2,loxAfr3,triMan1,dasNov3,hetGla2,hg19	#N/A	#N/A
DDX31	6	0	0	odoRosDi,orcOrc1,turTru2,susScr3,triMan1,dasNov3	#N/A	#N/A
CYB5R3	8	1	1	odoRosDi,orcOrc1,susScr3,loxAfr3,triMan1,dasNov3,hetGla2,hg19	hg19	hg19
CXXC1	4	0	0	turTru2,cerSim1,loxAfr3,triMan1	#N/A	#N/A
CCL16	5	0	0	orcOrc1,turTru2,cerSim1,loxAfr3,hg19	#N/A	#N/A
DLGAP3	4	0	0	odoRosDi,loxAfr3,triMan1,hetGla2	#N/A	#N/A
ARHGAP11A	7	0	0	orcOrc1,turTru2,susScr3,cerSim1,triMan1,hetGla2,hg19	#N/A	#N/A
ANKRD46	4	0	0	cerSim1,loxAfr3,triMan1,dasNov3	#N/A	#N/A
ARPC1A	2	0	0	dasNov3,hetGla2	#N/A	#N/A
ART5	5	0	0	odoRosDi,susScr3,loxAfr3,dasNov3,hetGla2	#N/A	#N/A
BC061642	1	0	0	cerSim1	#N/A	#N/A
DGKA	4	0	0	cerSim1,triMan1,dasNov3,hetGla2	#N/A	#N/A
BRCA1	7	0	1	turTru2,cerSim1,loxAfr3,triMan1,dasNov3,hetGla2,hg19	#N/A	hetGla2
DLX6	3	0	0	loxAfr3,dasNov3,hetGla2	#N/A	#N/A
ARHGEF1	7	0	0	orcOrc1,turTru2,loxAfr3,triMan1,dasNov3,hetGla2,hg19	#N/A	#N/A
DEF8	5	1	1	odoRosDi,orcOrc1,susScr3,loxAfr3,dasNov3	dasNov3	dasNov3
CD80	6	0	0	orcOrc1,turTru2,loxAfr3,triMan1,dasNov3,hetGla2	#N/A	#N/A
DNAJB4	5	0	0	cerSim1,loxAfr3,triMan1,dasNov3,hetGla2	#N/A	#N/A
CAPNS1	4	0	0	odoRosDi,susScr3,cerSim1,triMan1	#N/A	#N/A
ALG13	4	0	0	susScr3,loxAfr3,dasNov3,hetGla2	#N/A	#N/A
ARL15	2	0	0	susScr3,triMan1	#N/A	#N/A
ALKBH2	4	0	0	odoRosDi,cerSim1,triMan1,hetGla2	#N/A	#N/A
BTK	4	0	0	susScr3,triMan1,dasNov3,hetGla2	#N/A	#N/A
BTN3A1	3	0	0	cerSim1,dasNov3,hg19	#N/A	#N/A
AGGF1	8	0	0	odoRosDi,turTru2,susScr3,cerSim1,triMan1,dasNov3,hetGla2,hg19	#N/A	#N/A
CCNL2	3	0	0	cerSim1,triMan1,dasNov3	#N/A	#N/A
DAZ2	4	1	1	susScr3,cerSim1,triMan1,hg19	hg19	hg19
CYP2S1	9	0	2	odoRosDi,orcOrc1,susScr3,cerSim1,loxAfr3,triMan1,dasNov3,hetGla2,hg19	#N/A	odoRosDi,orcOrc1
CBLN1	#N/A	#N/A	#N/A	#N/A	#N/A	#N/A
CACNA2D3	5	0	0	odoRosDi,loxAfr3,triMan1,dasNov3,hetGla2	#N/A	#N/A
DDX11L9	4	0	0	cerSim1,loxAfr3,dasNov3,hg19	#N/A	#N/A
CD96	7	0	0	odoRosDi,orcOrc1,turTru2,susScr3,cerSim1,dasNov3,hetGla2	#N/A	#N/A
CSDC2	3	0	0	orcOrc1,dasNov3,hetGla2	#N/A	#N/A
CLCN7	8	0	2	turTru2,susScr3,cerSim1,loxAfr3,triMan1,dasNov3,hetGla2,hg19	#N/A	turTru2,dasNov3
CRB3	7	0	0	orcOrc1,turTru2,susScr3,triMan1,dasNov3,hetGla2,hg19	#N/A	#N/A
ABRA	8	0	1	odoRosDi,orcOrc1,susScr3,cerSim1,triMan1,dasNov3,hetGla2,hg19	#N/A	hetGla2
ASL	5	0	0	odoRosDi,orcOrc1,susScr3,triMan1,hetGla2	#N/A	#N/A
ANGPTL3	3	0	0	odoRosDi,turTru2,hetGla2	#N/A	#N/A
CXCR3	2	0	0	cerSim1,triMan1	#N/A	#N/A
EPS8	6	1	2	odoRosDi,cerSim1,triMan1,dasNov3,hetGla2,hg19	triMan1	triMan1,hg19
AP4E1	5	0	0	orcOrc1,susScr3,triMan1,dasNov3,hetGla2	#N/A	#N/A
DHRS9	5	0	0	odoRosDi,orcOrc1,cerSim1,triMan1,hetGla2	#N/A	#N/A
ANTXR2	4	0	0	odoRosDi,turTru2,dasNov3,hg19	#N/A	#N/A
CISD2	2	0	0	dasNov3,hetGla2	#N/A	#N/A
CPT1B	7	0	0	odoRosDi,orcOrc1,cerSim1,loxAfr3,triMan1,dasNov3,hg19	#N/A	#N/A
ADAM21P1	0	0	0	#N/A	#N/A	#N/A
ARL9	3	0	0	susScr3,hetGla2,hg19	#N/A	#N/A
CUL5	0	0	0	#N/A	#N/A	#N/A
EPCAM	6	0	0	odoRosDi,susScr3,cerSim1,dasNov3,hetGla2,hg19	#N/A	#N/A
CPNE6	7	1	1	odoRosDi,turTru2,susScr3,cerSim1,loxAfr3,triMan1,hetGla2	triMan1	triMan1
ADA	7	0	0	odoRosDi,orcOrc1,cerSim1,loxAfr3,triMan1,hetGla2,hg19	#N/A	#N/A
AV8S2	4	0	0	odoRosDi,cerSim1,dasNov3,hetGla2	#N/A	#N/A
DBH-AS1	5	0	0	odoRosDi,turTru2,cerSim1,hetGla2,hg19	#N/A	#N/A
DKK4	2	0	0	orcOrc1,cerSim1	#N/A	#N/A
AFF2	7	1	1	turTru2,susScr3,cerSim1,loxAfr3,triMan1,hetGla2,hg19	triMan1	triMan1
ABHD10	5	0	0	orcOrc1,cerSim1,triMan1,dasNov3,hetGla2	#N/A	#N/A
CD36	9	0	0	odoRosDi,orcOrc1,turTru2,susScr3,cerSim1,triMan1,dasNov3,hetGla2,hg19	#N/A	#N/A
DIO3OS	6	0	0	odoRosDi,orcOrc1,turTru2,susScr3,triMan1,hg19	#N/A	#N/A
CALR	6	0	1	odoRosDi,turTru2,susScr3,cerSim1,triMan1,dasNov3	#N/A	cerSim1
CC2D1A	6	0	2	odoRosDi,orcOrc1,turTru2,cerSim1,hetGla2,hg19	#N/A	cerSim1,hg19
BANP	5	0	2	susScr3,cerSim1,triMan1,dasNov3,hetGla2	#N/A	cerSim1,dasNov3
ANXA8	5	0	1	orcOrc1,susScr3,cerSim1,dasNov3,hg19	#N/A	dasNov3
C10orf62	8	0	0	odoRosDi,orcOrc1,turTru2,susScr3,cerSim1,loxAfr3,triMan1,hetGla2	#N/A	#N/A
DMAP1	4	0	0	cerSim1,loxAfr3,dasNov3,hetGla2	#N/A	#N/A
APP	8	1	2	odoRosDi,turTru2,susScr3,cerSim1,loxAfr3,dasNov3,hetGla2,hg19	odoRosDi	odoRosDi,cerSim1
BMF	6	0	0	orcOrc1,cerSim1,loxAfr3,triMan1,dasNov3,hg19	#N/A	#N/A
ACSM5	6	0	0	odoRosDi,cerSim1,loxAfr3,triMan1,dasNov3,hg19	#N/A	#N/A
COX19	0	0	0	#N/A	#N/A	#N/A
CYP4F11	5	0	0	cerSim1,loxAfr3,triMan1,hetGla2,hg19	#N/A	#N/A
DDX59	7	0	0	orcOrc1,susScr3,cerSim1,triMan1,dasNov3,hetGla2,hg19	#N/A	#N/A
CLDN7	5	0	0	susScr3,cerSim1,dasNov3,hetGla2,hg19	#N/A	#N/A
ARSD	3	0	0	loxAfr3,triMan1,hg19	#N/A	#N/A
AAGAB	5	0	0	odoRosDi,cerSim1,loxAfr3,dasNov3,hetGla2	#N/A	#N/A
DDX11	5	0	0	cerSim1,loxAfr3,triMan1,hetGla2,hg19	#N/A	#N/A
ARID3B	6	0	0	susScr3,cerSim1,loxAfr3,triMan1,dasNov3,hetGla2	#N/A	#N/A
CNPY1	6	0	0	odoRosDi,susScr3,cerSim1,triMan1,dasNov3,hg19	#N/A	#N/A
ANKRD22	6	0	0	odoRosDi,orcOrc1,susScr3,loxAfr3,triMan1,dasNov3	#N/A	#N/A
AOC4	5	0	0	cerSim1,triMan1,dasNov3,hetGla2,hg19	#N/A	#N/A
CSNK2A2	4	0	0	turTru2,triMan1,dasNov3,hetGla2	#N/A	#N/A
FBXW8	4	0	1	susScr3,cerSim1,triMan1,dasNov3	#N/A	susScr3
CXorf58	7	0	0	odoRosDi,turTru2,susScr3,cerSim1,triMan1,dasNov3,hg19	#N/A	#N/A
CXCL2	5	0	0	cerSim1,loxAfr3,triMan1,hetGla2,hg19	#N/A	#N/A
CRX	1	0	0	susScr3	#N/A	#N/A
CYFIP2	1	0	0	susScr3	#N/A	#N/A
BAG1	10	0	0	odoRosDi,orcOrc1,turTru2,susScr3,cerSim1,loxAfr3,triMan1,dasNov3,hetGla2,hg19	#N/A	#N/A
CCNF	8	0	0	odoRosDi,susScr3,cerSim1,loxAfr3,triMan1,dasNov3,hetGla2,hg19	#N/A	#N/A
CBX1	0	0	0	#N/A	#N/A	#N/A
APLN	4	0	0	odoRosDi,susScr3,cerSim1,dasNov3	#N/A	#N/A
ANKRD35	7	0	0	turTru2,cerSim1,loxAfr3,triMan1,dasNov3,hetGla2,hg19	#N/A	#N/A
ANK2	6	0	0	odoRosDi,orcOrc1,turTru2,cerSim1,triMan1,dasNov3	#N/A	#N/A
C11orf65	6	0	0	odoRosDi,turTru2,susScr3,cerSim1,triMan1,hetGla2	#N/A	#N/A
CNGA2	7	0	0	orcOrc1,turTru2,cerSim1,loxAfr3,triMan1,hetGla2,hg19	#N/A	#N/A
COX20	5	0	0	odoRosDi,susScr3,cerSim1,triMan1,hg19	#N/A	#N/A
FOXI3	4	0	1	loxAfr3,triMan1,dasNov3,hetGla2	#N/A	dasNov3
C12orf61	3	0	0	odoRosDi,loxAfr3,dasNov3	#N/A	#N/A
CCDC50	7	0	0	orcOrc1,turTru2,cerSim1,loxAfr3,triMan1,dasNov3,hg19	#N/A	#N/A
C1orf140	5	0	0	odoRosDi,turTru2,cerSim1,loxAfr3,hg19	#N/A	#N/A
DBH	9	0	0	odoRosDi,turTru2,susScr3,cerSim1,loxAfr3,triMan1,dasNov3,hetGla2,hg19	#N/A	#N/A
ASTN1	7	0	0	odoRosDi,orcOrc1,turTru2,susScr3,cerSim1,triMan1,hg19	#N/A	#N/A
FGF4	3	0	0	susScr3,hetGla2,hg19	#N/A	#N/A
CSDE1	7	0	0	odoRosDi,orcOrc1,turTru2,cerSim1,loxAfr3,dasNov3,hetGla2	#N/A	#N/A
CTNNA2	2	0	1	turTru2,triMan1	#N/A	turTru2
DNHD1	6	1	2	orcOrc1,susScr3,cerSim1,loxAfr3,triMan1,hetGla2	susScr3	susScr3,triMan1
CD1B	2	0	0	susScr3,loxAfr3	#N/A	#N/A
CBLN2	2	0	0	susScr3,hetGla2	#N/A	#N/A
CCDC88A	8	1	1	odoRosDi,susScr3,cerSim1,loxAfr3,triMan1,dasNov3,hetGla2,hg19	triMan1	triMan1
C1orf173	9	0	0	odoRosDi,orcOrc1,turTru2,susScr3,loxAfr3,triMan1,dasNov3,hetGla2,hg19	#N/A	#N/A
CPLX1	2	0	1	hetGla2,hg19	#N/A	hetGla2
DDX1	5	0	0	odoRosDi,turTru2,cerSim1,loxAfr3,dasNov3	#N/A	#N/A
CCL17	8	0	1	odoRosDi,orcOrc1,turTru2,cerSim1,loxAfr3,triMan1,dasNov3,hetGla2	#N/A	cerSim1
C16orf13	4	0	0	odoRosDi,cerSim1,triMan1,dasNov3	#N/A	#N/A
COMMD2	8	1	2	odoRosDi,orcOrc1,turTru2,susScr3,cerSim1,loxAfr3,dasNov3,hetGla2	turTru2	turTru2,loxAfr3
DCTPP1	5	0	0	odoRosDi,susScr3,cerSim1,dasNov3,hetGla2	#N/A	#N/A
FGF18	2	0	0	loxAfr3,hetGla2	#N/A	#N/A
AMZ1	6	1	1	odoRosDi,orcOrc1,turTru2,cerSim1,dasNov3,hg19	dasNov3	dasNov3
CISD3	6	0	0	susScr3,cerSim1,loxAfr3,dasNov3,hetGla2,hg19	#N/A	#N/A
C12orf45	5	1	1	odoRosDi,turTru2,triMan1,hetGla2,hg19	hetGla2	hetGla2
CALCRL	7	1	1	odoRosDi,turTru2,cerSim1,loxAfr3,triMan1,dasNov3,hetGla2	cerSim1	cerSim1
AES	2	0	0	odoRosDi,hg19	#N/A	#N/A
CCT7	9	0	0	odoRosDi,orcOrc1,turTru2,susScr3,cerSim1,loxAfr3,triMan1,dasNov3,hetGla2	#N/A	#N/A
ANO5	4	0	0	odoRosDi,triMan1,dasNov3,hetGla2	#N/A	#N/A
AQP8	6	0	0	odoRosDi,orcOrc1,cerSim1,loxAfr3,triMan1,hg19	#N/A	#N/A
FILIP1	6	0	0	odoRosDi,susScr3,cerSim1,loxAfr3,dasNov3,hetGla2	#N/A	#N/A
C11orf96	2	0	1	dasNov3,hg19	#N/A	hg19
CCBL2	7	1	1	odoRosDi,susScr3,cerSim1,loxAfr3,triMan1,dasNov3,hg19	susScr3	susScr3
C12orf63	7	0	0	orcOrc1,cerSim1,loxAfr3,triMan1,dasNov3,hetGla2,hg19	#N/A	#N/A
DAGLA	8	1	1	odoRosDi,orcOrc1,turTru2,susScr3,cerSim1,loxAfr3,triMan1,hetGla2	turTru2	turTru2
APLNR	3	0	0	cerSim1,triMan1,hetGla2	#N/A	#N/A
EPOR	7	0	0	orcOrc1,turTru2,cerSim1,loxAfr3,triMan1,hetGla2,hg19	#N/A	#N/A
ACOT9	5	0	0	susScr3,cerSim1,loxAfr3,triMan1,hetGla2	#N/A	#N/A
ARL16	3	0	0	turTru2,hetGla2,hg19	#N/A	#N/A
DDN	6	0	0	odoRosDi,turTru2,susScr3,loxAfr3,dasNov3,hg19	#N/A	#N/A
ASPH	8	0	0	odoRosDi,orcOrc1,turTru2,susScr3,triMan1,dasNov3,hetGla2,hg19	#N/A	#N/A
CRIM1	4	0	0	turTru2,susScr3,cerSim1,loxAfr3	#N/A	#N/A
ANKRD49	5	0	0	odoRosDi,orcOrc1,susScr3,cerSim1,dasNov3	#N/A	#N/A
FBXO31	3	0	0	cerSim1,triMan1,hetGla2	#N/A	#N/A
ABCE1	1	0	0	dasNov3	#N/A	#N/A
DNAJB5	7	0	1	orcOrc1,susScr3,cerSim1,triMan1,dasNov3,hetGla2,hg19	#N/A	triMan1
CPLX2	0	0	0	#N/A	#N/A	#N/A
DDB2	4	1	1	odoRosDi,turTru2,triMan1,dasNov3	dasNov3	dasNov3
DENND1B	4	0	0	susScr3,cerSim1,dasNov3,hg19	#N/A	#N/A
DIO3	6	0	0	susScr3,cerSim1,loxAfr3,triMan1,dasNov3,hg19	#N/A	#N/A
AHNAK2	2	0	0	loxAfr3,hg19	#N/A	#N/A
CYP26A1	7	0	0	susScr3,cerSim1,loxAfr3,triMan1,dasNov3,hetGla2,hg19	#N/A	#N/A
BBS12	9	0	0	odoRosDi,orcOrc1,turTru2,susScr3,cerSim1,triMan1,dasNov3,hetGla2,hg19	#N/A	#N/A
FGF5	6	0	0	odoRosDi,orcOrc1,susScr3,cerSim1,triMan1,hetGla2	#N/A	#N/A
CSTL1	7	0	0	odoRosDi,orcOrc1,cerSim1,loxAfr3,triMan1,dasNov3,hg19	#N/A	#N/A
CCDC71L	3	0	0	dasNov3,hetGla2,hg19	#N/A	#N/A
AGPAT6	7	0	0	orcOrc1,cerSim1,loxAfr3,triMan1,dasNov3,hetGla2,hg19	#N/A	#N/A
DNAJC12	7	0	1	odoRosDi,turTru2,susScr3,cerSim1,loxAfr3,triMan1,hg19	#N/A	hg19
ACSF3	5	0	0	susScr3,cerSim1,triMan1,hetGla2,hg19	#N/A	#N/A
CTNS	6	0	0	odoRosDi,turTru2,cerSim1,triMan1,dasNov3,hetGla2	#N/A	#N/A
CAB39L	7	0	0	orcOrc1,turTru2,cerSim1,loxAfr3,triMan1,dasNov3,hetGla2	#N/A	#N/A
ATAD2	7	0	2	odoRosDi,orcOrc1,turTru2,cerSim1,triMan1,hetGla2,hg19	#N/A	hetGla2,hg19
DCAF16	4	0	0	loxAfr3,triMan1,dasNov3,hetGla2	#N/A	#N/A
COPS6	0	0	1	#N/A	#N/A	turTru2
APOA5	8	0	0	odoRosDi,orcOrc1,susScr3,cerSim1,loxAfr3,triMan1,dasNov3,hg19	#N/A	#N/A
CNNM4	8	0	0	odoRosDi,turTru2,cerSim1,loxAfr3,triMan1,dasNov3,hetGla2,hg19	#N/A	#N/A
ADAM21	3	0	0	cerSim1,dasNov3,hg19	#N/A	#N/A
CCDC140	5	0	1	odoRosDi,orcOrc1,loxAfr3,triMan1,hg19	#N/A	hg19
CCNB2	5	0	0	odoRosDi,cerSim1,loxAfr3,triMan1,dasNov3	#N/A	#N/A
BPGM	2	0	0	cerSim1,triMan1	#N/A	#N/A
CXCL3	2	0	0	hetGla2,hg19	#N/A	#N/A
CAMKV	7	0	0	odoRosDi,susScr3,cerSim1,loxAfr3,dasNov3,hetGla2,hg19	#N/A	#N/A
C1orf141	7	0	0	orcOrc1,cerSim1,loxAfr3,triMan1,dasNov3,hetGla2,hg19	#N/A	#N/A
CCDC71	8	0	0	odoRosDi,orcOrc1,turTru2,susScr3,cerSim1,loxAfr3,triMan1,hetGla2	#N/A	#N/A
DIXDC1	8	0	0	odoRosDi,turTru2,susScr3,cerSim1,loxAfr3,triMan1,dasNov3,hg19	#N/A	#N/A
BRK1	#N/A	#N/A	#N/A	#N/A	#N/A	#N/A
AVEN	6	0	0	turTru2,susScr3,cerSim1,triMan1,dasNov3,hetGla2	#N/A	#N/A
ADM2	4	0	0	odoRosDi,loxAfr3,triMan1,hg19	#N/A	#N/A
BPIFB4	7	0	0	odoRosDi,susScr3,cerSim1,loxAfr3,triMan1,hetGla2,hg19	#N/A	#N/A
DERL2	2	0	0	turTru2,dasNov3	#N/A	#N/A
CCDC11	9	0	0	orcOrc1,turTru2,susScr3,cerSim1,loxAfr3,triMan1,dasNov3,hetGla2,hg19	#N/A	#N/A
CNPY2	3	0	0	cerSim1,triMan1,dasNov3	#N/A	#N/A
CASP5	6	0	0	odoRosDi,orcOrc1,cerSim1,loxAfr3,triMan1,hetGla2	#N/A	#N/A
DNAJC5	0	0	0	#N/A	#N/A	#N/A
C12orf10	6	0	0	turTru2,susScr3,cerSim1,triMan1,hetGla2,hg19	#N/A	#N/A
CMPK2	7	0	0	orcOrc1,turTru2,susScr3,triMan1,dasNov3,hetGla2,hg19	#N/A	#N/A
DNASE1	9	0	0	odoRosDi,orcOrc1,susScr3,cerSim1,loxAfr3,triMan1,dasNov3,hetGla2,hg19	#N/A	#N/A
CLDN22	6	0	1	odoRosDi,turTru2,cerSim1,triMan1,dasNov3,hetGla2	#N/A	dasNov3
ALKBH3	3	0	0	turTru2,susScr3,triMan1	#N/A	#N/A
ACTRT2	7	0	0	odoRosDi,susScr3,cerSim1,loxAfr3,dasNov3,hetGla2,hg19	#N/A	#N/A
CBX2	3	0	0	odoRosDi,turTru2,hetGla2	#N/A	#N/A
CSPP1	9	0	1	odoRosDi,orcOrc1,turTru2,susScr3,loxAfr3,triMan1,dasNov3,hetGla2,hg19	#N/A	turTru2
COCH	5	0	0	odoRosDi,susScr3,cerSim1,dasNov3,hetGla2	#N/A	#N/A
CWC27	5	0	1	odoRosDi,cerSim1,triMan1,hetGla2,hg19	#N/A	hg19
COX4I1	3	0	0	cerSim1,loxAfr3,triMan1	#N/A	#N/A
CD63	3	0	0	turTru2,cerSim1,dasNov3	#N/A	#N/A
CRBN	4	0	0	susScr3,loxAfr3,dasNov3,hetGla2	#N/A	#N/A
COQ4	7	0	0	odoRosDi,turTru2,susScr3,cerSim1,loxAfr3,triMan1,dasNov3	#N/A	#N/A
ADRA2A	4	0	0	susScr3,cerSim1,dasNov3,hg19	#N/A	#N/A
DMTN	5	0	0	odoRosDi,susScr3,cerSim1,triMan1,dasNov3	#N/A	#N/A
CRISPLD2	4	0	0	odoRosDi,orcOrc1,cerSim1,dasNov3	#N/A	#N/A
ARSE	4	0	0	odoRosDi,turTru2,triMan1,hg19	#N/A	#N/A
CA4	8	1	1	turTru2,susScr3,cerSim1,loxAfr3,triMan1,dasNov3,hetGla2,hg19	hg19	hg19
CAPNS2	4	1	1	orcOrc1,cerSim1,triMan1,hetGla2	triMan1	triMan1
ANKRD23	8	2	2	odoRosDi,orcOrc1,turTru2,cerSim1,loxAfr3,triMan1,hetGla2,hg19	odoRosDi,triMan1	odoRosDi,triMan1
BRMS1L	1	0	0	dasNov3	#N/A	#N/A
FGFR1OP	7	0	0	turTru2,susScr3,loxAfr3,triMan1,dasNov3,hetGla2,hg19	#N/A	#N/A
AMER3	8	1	1	odoRosDi,orcOrc1,turTru2,susScr3,cerSim1,dasNov3,hetGla2,hg19	dasNov3	dasNov3
ACY1	6	0	0	odoRosDi,orcOrc1,susScr3,loxAfr3,triMan1,dasNov3	#N/A	#N/A
CRY1	6	0	1	odoRosDi,turTru2,susScr3,cerSim1,loxAfr3,dasNov3	#N/A	turTru2
CPLX3	7	0	0	odoRosDi,susScr3,loxAfr3,triMan1,dasNov3,hetGla2,hg19	#N/A	#N/A
CLDN8	6	1	1	odoRosDi,turTru2,susScr3,loxAfr3,triMan1,dasNov3	dasNov3	dasNov3
ARPC1B	4	0	1	odoRosDi,susScr3,cerSim1,hetGla2	#N/A	susScr3
DHRS12	2	0	0	cerSim1,hg19	#N/A	#N/A
ATP6AP1	5	0	0	cerSim1,loxAfr3,triMan1,dasNov3,hetGla2	#N/A	#N/A
ADAM11	7	1	1	odoRosDi,orcOrc1,cerSim1,loxAfr3,triMan1,dasNov3,hetGla2	odoRosDi	odoRosDi
CCRN4L	8	0	0	odoRosDi,orcOrc1,turTru2,susScr3,loxAfr3,triMan1,hetGla2,hg19	#N/A	#N/A
ANXA9	6	0	0	odoRosDi,loxAfr3,triMan1,dasNov3,hetGla2,hg19	#N/A	#N/A
FGF19	5	0	0	odoRosDi,loxAfr3,triMan1,dasNov3,hetGla2	#N/A	#N/A
AK022898	6	0	1	odoRosDi,orcOrc1,susScr3,cerSim1,triMan1,hetGla2	#N/A	susScr3
ABCA12	8	0	0	odoRosDi,orcOrc1,turTru2,susScr3,cerSim1,triMan1,dasNov3,hg19	#N/A	#N/A
ARRDC1	6	0	0	orcOrc1,turTru2,loxAfr3,triMan1,hetGla2,hg19	#N/A	#N/A
DKKL1	5	0	0	odoRosDi,loxAfr3,triMan1,hetGla2,hg19	#N/A	#N/A
CYP2C8	3	0	0	susScr3,dasNov3,hg19	#N/A	#N/A
C16orf62	5	0	0	odoRosDi,cerSim1,triMan1,hetGla2,hg19	#N/A	#N/A
C14orf177	7	0	0	turTru2,susScr3,cerSim1,triMan1,dasNov3,hetGla2,hg19	#N/A	#N/A
CYB5R4	9	0	0	odoRosDi,orcOrc1,turTru2,susScr3,cerSim1,loxAfr3,triMan1,dasNov3,hetGla2	#N/A	#N/A
FBXO7	6	0	0	odoRosDi,turTru2,susScr3,triMan1,dasNov3,hg19	#N/A	#N/A
FOXJ1	5	0	0	cerSim1,loxAfr3,triMan1,dasNov3,hetGla2	#N/A	#N/A
DCUN1D1	2	0	0	cerSim1,hetGla2	#N/A	#N/A
CCDC141	6	0	0	odoRosDi,orcOrc1,turTru2,cerSim1,triMan1,hetGla2	#N/A	#N/A
DCST1	8	0	0	odoRosDi,orcOrc1,turTru2,cerSim1,loxAfr3,triMan1,hetGla2,hg19	#N/A	#N/A
ATF6	5	0	0	turTru2,susScr3,dasNov3,hetGla2,hg19	#N/A	#N/A
CABYR	7	0	0	odoRosDi,susScr3,cerSim1,loxAfr3,triMan1,dasNov3,hg19	#N/A	#N/A
CUL7	9	0	0	odoRosDi,orcOrc1,turTru2,susScr3,cerSim1,triMan1,dasNov3,hetGla2,hg19	#N/A	#N/A
C11orf42	8	0	0	odoRosDi,susScr3,cerSim1,loxAfr3,triMan1,dasNov3,hetGla2,hg19	#N/A	#N/A
BRDT	6	0	0	orcOrc1,turTru2,cerSim1,loxAfr3,triMan1,dasNov3	#N/A	#N/A
C16orf97	2	0	0	orcOrc1,triMan1	#N/A	#N/A
BTBD3	5	2	2	turTru2,loxAfr3,triMan1,dasNov3,hetGla2	turTru2,loxAfr3	turTru2,loxAfr3
C17orf75	6	0	0	odoRosDi,cerSim1,triMan1,dasNov3,hetGla2,hg19	#N/A	#N/A
AF035281	2	0	0	dasNov3,hg19	#N/A	#N/A
CDC37	3	0	0	susScr3,cerSim1,hetGla2	#N/A	#N/A
CCL18	8	0	0	odoRosDi,turTru2,susScr3,cerSim1,loxAfr3,triMan1,dasNov3,hetGla2	#N/A	#N/A
C19orf38	8	1	2	odoRosDi,orcOrc1,susScr3,cerSim1,loxAfr3,triMan1,dasNov3,hg19	cerSim1	cerSim1,triMan1
C16orf90	5	0	0	odoRosDi,turTru2,cerSim1,dasNov3,hetGla2	#N/A	#N/A
ACLY	5	0	1	odoRosDi,turTru2,loxAfr3,triMan1,hetGla2	#N/A	hetGla2
DBX2	6	0	0	odoRosDi,turTru2,loxAfr3,triMan1,dasNov3,hg19	#N/A	#N/A
DNAJC24	7	0	0	odoRosDi,susScr3,cerSim1,loxAfr3,triMan1,dasNov3,hetGla2	#N/A	#N/A
CD1C	4	0	0	odoRosDi,susScr3,loxAfr3,hg19	#N/A	#N/A
[truncated: 17,150 more rows]

## Sheet: EnrichWithSpeciesCountCutoffs
pvalsWSR	ratiovalsWSR	cutoff
0.638865	Inf	1
1	1.25898	2
0.699719	1.28241	3
0.0966968	1.86859	4
0.0418495	1.7912	5
0.000281095	2.52883	6
0.00261155	2.10242	7
0.00719554	2.17336	8
0.0542184	2.28605	9
0.0381614	4.23602	10

## Sheet: EnrichPerSpecies
	pvals	stat	names	prettyname
sarHar1	0.858362	0.930744	sarHar1	Tasmanian Devil
lepWed1	0.653886	1.22015	lepWed1	Weddell Seal
jacJac1	0.581582	1.19895	jacJac1	Marmoset
chiLan1	0.195464	0.697627	chiLan1	Chinchilla
ochPri3	0.107446	1.76866	ochPri3	Pika
sorAra2	0.462718	1.29205	sorAra2	Shrew
pteVam1	0.240812	1.64353	pteVam1	Megabat
rn5	1	0.997348	rn5	Rat
panTro4	0.323886	1.50498	panTro4	Chimp
nomLeu3	0.763064	0.895738	nomLeu3	Gibbon
odoRosDi	0.245176	1.50262	odoRosDi	Walrus
orcOrc1	0.608724	0.81117	orcOrc1	Orca
turTru2	0.23971	1.5935	turTru2	Dolphin
susScr3	0.0177293	2.13913	susScr3	Pig
cerSim1	0.167942	1.54925	cerSim1	Rhino
loxAfr3	0.691669	1.15272	loxAfr3	Elephant
triMan1	0.109701	1.79655	triMan1	Manatee
dasNov3	0.0183023	2.20668	dasNov3	Armadillo
hetGla2	0.689046	1.14091	hetGla2	Naked Mole-Rat
hg19	0.347127	1.44142	hg19	Human

## Sheet: SigGeneCounts
	NumSigRateShifts
odoRosDi	10036
orcOrc1	5976
turTru2	7414
susScr3	10077
cerSim1	11828
loxAfr3	10569
triMan1	12346
dasNov3	11761
hetGla2	12213
hg19	9617
