# Supplementary material for: Complementary evolution of coding and noncoding sequence underlies mammalian hairlessness
Source: eLife journal article supplement (doi:10.7554/elife.76911), 2022-11-07
Supplement: supp [file SuppFile5.xlsx]

## Sheet: Canonical
	Genes							Noncoding Regions
Pathway	stat	pval	p.adju	num.genes	permPval	permPadj		stat	pval	p.adj	num.genes	permPval	permPadj
BIOCARTA_41BB_PATHWAY	-0.116814	0.0955988	0.242247	17	0.232	0.587121		-0.0752094	2.80722e-06	2.68604e-05	324	0.003	0.19
BIOCARTA_ACE2_PATHWAY	-0.182351	0.0228709	0.095823	13	0.168	0.513357		-0.0332265	0.0730128	0.134497	243	0.316	0.746501
BIOCARTA_ACH_PATHWAY	-0.0353295	0.624825	0.806986	16	0.655	0.879405		-0.0622559	1.77688e-05	0.000123731	397	0.035	0.372803
BIOCARTA_ACTINY_PATHWAY	0.136846	0.0581985	0.175565	16	0.11	0.436743		-0.0303667	0.0229365	0.0505627	469	0.171	0.63175
BIOCARTA_AGPCR_PATHWAY	-0.0295727	0.722899	0.861853	12	NA	NA		-0.00742437	0.630813	0.723259	350	0.882	0.963103
BIOCARTA_AGR_PATHWAY	0.0115909	0.81796	0.910925	33	0.869	0.959637		-0.00960394	0.157479	0.250235	1828	0.603	0.87128
BIOCARTA_AHSP_PATHWAY	-0.0283519	0.723483	0.861853	13	0.736	0.908945		0.00361374	0.883562	0.923124	137	0.952	0.989213
BIOCARTA_AKAP13_PATHWAY	-0.118909	0.193021	0.381525	10	NA	NA		-0.0805818	1.67073e-06	1.82137e-05	295	0.001	0.147778
BIOCARTA_AKAP95_PATHWAY	-0.169536	0.0634671	0.18788	10	NA	NA		-0.073976	2.41659e-05	0.000158329	272	0.031	0.368125
BIOCARTA_AKAPCENTROSOME_PATHWAY	-0.131156	0.115812	0.276856	12	0.156	0.500777		-0.0574984	2.12443e-05	0.000141918	457	0.019	0.321538
BIOCARTA_AKT_PATHWAY	-0.164779	0.00899584	0.0522831	21	0.049	0.33604		-0.0584669	7.44973e-06	5.93302e-05	491	0	0.147778
BIOCARTA_ALK_PATHWAY	-0.0613376	0.197254	0.387474	37	0.259	0.616491		-0.0265882	0.000252559	0.00111968	1596	0.344	0.771176
BIOCARTA_AMI_PATHWAY	-0.0742326	0.250758	0.448111	20	0.536	0.804667		-0.0147355	0.458728	0.559732	211	0.702	0.914613
BIOCARTA_ARAP_PATHWAY	0.0518065	0.473316	0.676134	16	0.524	0.799638		-0.00226691	0.90305	0.937831	241	0.955	0.989213
BIOCARTA_ARENRF2_PATHWAY	0.0391275	0.668413	0.830273	10	NA	NA		-0.0105377	0.470999	0.572081	391	0.791	0.937099
BIOCARTA_ARF_PATHWAY	-0.0507453	0.469078	0.67231	17	0.533	0.802158		-0.0271124	0.0425013	0.0851306	468	0.349	0.772329
BIOCARTA_ASBCELL_PATHWAY	-0.238785	0.00419497	0.0298597	12	0.062	0.37417		-0.0480317	0.0061143	0.0164608	272	0.289	0.726597
BIOCARTA_AT1R_PATHWAY	-0.0258739	0.635912	0.811914	28	0.667	0.881784		-0.0395947	7.36769e-06	5.93302e-05	1076	0.081	0.503411
BIOCARTA_ATM_PATHWAY	-0.14195	0.028076	0.110918	20	0.096	0.436743		-0.0383231	0.0107602	0.0266998	370	0.284	0.722218
BIOCARTA_ATRBRCA_PATHWAY	-0.225625	0.000347821	0.00495157	21	0.008	0.172429		-0.0213046	0.183846	0.28235	325	0.542	0.855113
BIOCARTA_BAD_PATHWAY	-0.197317	0.00106339	0.0116664	23	0.002	0.0754375		-0.0629029	5.32464e-09	1.23644e-07	721	0.017	0.321538
BIOCARTA_BARR_MAPK_PATHWAY	-0.013299	0.878651	0.949873	11	NA	NA		-0.0347504	0.0375774	0.0776055	299	0.452	0.814428
BIOCARTA_BARRESTIN_SRC_PATHWAY	-0.0215935	0.779766	0.891664	14	0.796	0.935513		-0.0282989	0.0621209	0.117359	363	0.495	0.832301
BIOCARTA_BCELLSURVIVAL_PATHWAY	-0.10081	0.162896	0.346872	16	0.123	0.451249		-0.0508719	0.00083911	0.00306598	360	0.013	0.310333
BIOCARTA_BCR_PATHWAY	-0.0593559	0.253229	0.451046	31	0.239	0.593687		-0.0356732	0.000292631	0.00124345	864	0.128	0.585728
BIOCARTA_BIOPEPTIDES_PATHWAY	0.00135201	0.977023	0.989519	38	0.977	0.991971		-0.0154109	0.0804657	0.145803	1080	0.623	0.878249
BIOCARTA_BLYMPHOCYTE_PATHWAY	-0.131099	0.132299	0.303599	11	0.282	0.626754		0.0163554	0.529945	0.628503	123	0.701	0.914613
BIOCARTA_CALCINEURIN_PATHWAY	-0.0352169	0.636915	0.811914	15	0.588	0.833979		-0.0435203	0.00010617	0.000545195	664	0.031	0.368125
BIOCARTA_CARDIACEGF_PATHWAY	-0.127358	0.0692153	0.199701	17	0.093	0.435081		-0.0170418	0.16172	0.255449	564	0.528	0.851833
BIOCARTA_CARM_ER_PATHWAY	-0.109738	0.0293201	0.112458	33	0.085	0.427479		-0.028504	5.38408e-05	0.00031134	1692	0.156	0.6175
BIOCARTA_CARM1_PATHWAY	-0.141887	0.103324	0.254691	11	0.076	0.407698		0.0249366	0.14656	0.237423	283	0.558	0.867593
BIOCARTA_CASPASE_PATHWAY	-0.0810974	0.178533	0.364048	23	0.372	0.70006		-0.0398094	0.0127396	0.0306397	327	0.186	0.647682
BIOCARTA_CBL_PATHWAY	-0.143058	0.0742211	0.209439	13	0.046	0.322802		-0.0298738	0.018155	0.0414882	523	0.377	0.794628
BIOCARTA_CCR3_PATHWAY	0.0149438	0.812733	0.908854	21	0.841	0.951347		0.00503931	0.657231	0.745834	649	0.889	0.965989
BIOCARTA_CCR5_PATHWAY	0.0180545	0.815144	0.910747	14	0.838	0.949975		-0.0378982	0.00226128	0.0071778	543	0.12	0.582171
BIOCARTA_CD40_PATHWAY	-0.175368	0.0187492	0.0833517	15	0.038	0.294013		-0.0454203	0.00418789	0.0119526	332	0.126	0.583902
BIOCARTA_CDC42RAC_PATHWAY	0.0343053	0.693696	0.847573	11	NA	NA		-0.0383068	0.0120315	0.0291473	359	0.231	0.685781
BIOCARTA_CDK5_PATHWAY	-0.112958	0.216256	0.412075	10	NA	NA		0.0279605	0.0905379	0.160976	306	0.44	0.809007
BIOCARTA_CDMAC_PATHWAY	-0.0947207	0.219981	0.417865	14	0.314	0.657983		-0.0180457	0.15356	0.245475	523	0.576	0.869557
BIOCARTA_CELL2CELL_PATHWAY	-0.0606817	0.448896	0.652238	13	0.489	0.773111		-0.0199733	0.0403802	0.0824363	883	0.355	0.774016
BIOCARTA_CELLCYCLE_PATHWAY	-0.139375	0.0207765	0.0901912	23	0.214	0.563969		-0.0464704	0.000423843	0.00171341	481	0.151	0.612287
BIOCARTA_CERAMIDE_PATHWAY	-0.105299	0.0950592	0.241363	21	0.12	0.448421		-0.0706485	1.34572e-06	1.50404e-05	391	0.046	0.409874
BIOCARTA_CFTR_PATHWAY	-0.0234833	0.787466	0.896424	11	0.846	0.952776		0.0257357	0.177642	0.274725	229	0.568	0.867856
BIOCARTA_CHEMICAL_PATHWAY	0.00484491	0.937344	0.973807	22	0.935	0.986015		-0.0539769	7.50648e-06	5.94263e-05	576	0.201	0.652212
BIOCARTA_CHREBP2_PATHWAY	0.033379	0.494899	0.696708	35	0.514	0.794364		-0.0111444	0.202291	0.304353	1099	0.489	0.826391
BIOCARTA_CK1_PATHWAY	-0.003436	0.963268	0.983449	15	0.983	0.994714		-0.00928137	0.444799	0.549798	567	0.73	0.918543
BIOCARTA_CLASSIC_PATHWAY	-0.0759202	0.343425	0.546632	13	0.7	0.897875		0.0444577	0.0180794	0.0413865	236	0.123	0.582171
BIOCARTA_COMP_PATHWAY	-0.102583	0.132096	0.303599	18	0.531	0.800146		0.0314516	0.0594065	0.113196	300	0.291	0.72887
BIOCARTA_CREB_PATHWAY	-0.00863846	0.883628	0.952003	24	0.883	0.968012		-0.0201364	0.053383	0.103347	771	0.531	0.851833
BIOCARTA_CSK_PATHWAY	-0.0607181	0.324553	0.528545	22	0.412	0.725236		-0.034362	0.0269975	0.0581014	346	0.385	0.797586
BIOCARTA_CTCF_PATHWAY	-0.0897593	0.1453	0.321844	22	0.303	0.65025		-0.037614	0.000474098	0.00188788	723	0.037	0.372803
BIOCARTA_CTL_PATHWAY	-0.103302	0.180993	0.366322	14	0.459	0.753362		-0.0237064	0.372549	0.482934	118	0.542	0.855113
BIOCARTA_CTLA4_PATHWAY	-0.126103	0.0510531	0.161711	20	0.185	0.538374		-0.0871512	2.45198e-08	4.40693e-07	342	0.003	0.19
BIOCARTA_CXCR4_PATHWAY	-0.0135072	0.822707	0.910925	23	0.83	0.947136		-0.0453217	4.08718e-05	0.000248217	686	0.021	0.321538
BIOCARTA_CYTOKINE_PATHWAY	-0.229635	0.000272248	0.00405606	21	0.025	0.255138		-0.0603327	0.00133603	0.0045679	236	0.019	0.321538
BIOCARTA_D4GDI_PATHWAY	-0.0826632	0.302275	0.503262	13	0.38	0.700244		-0.0330696	0.102036	0.17753	204	0.421	0.809007
BIOCARTA_DC_PATHWAY	-0.242	8.62201e-05	0.0017032	22	0.084	0.427479		0.00109013	0.946789	0.966408	313	0.958	0.990008
BIOCARTA_DEATH_PATHWAY	-0.154338	0.00254271	0.0207846	32	0.105	0.436743		-0.0768082	7.81357e-11	3.99694e-09	600	0.005	0.255769
BIOCARTA_DREAM_PATHWAY	-0.0862663	0.300967	0.502139	12	0.377	0.70006		-0.0258647	0.107724	0.185347	323	0.434	0.809007
BIOCARTA_ECM_PATHWAY	0.0734759	0.233207	0.431978	22	0.306	0.65025		-0.0112628	0.300707	0.415264	707	0.563	0.867856
BIOCARTA_EDG1_PATHWAY	-0.0475155	0.411267	0.613966	25	0.441	0.741994		-0.0308676	0.00759246	0.0199171	626	0.299	0.736426
BIOCARTA_EGF_PATHWAY	-0.0569474	0.273	0.474473	31	0.35	0.690278		-0.0316069	0.00117952	0.00413923	883	0.244	0.702424
BIOCARTA_EGFR_SMRTE_PATHWAY	-0.0280254	0.747644	0.876285	11	NA	NA		0.0272489	0.0305368	0.0647751	527	0.442	0.809725
BIOCARTA_EIF_PATHWAY	0.0303383	0.716033	0.859882	12	0.708	0.901125		-0.0503636	0.00154679	0.00516891	330	0.049	0.409874
BIOCARTA_EIF2_PATHWAY	0.0249334	0.774687	0.889871	11	NA	NA		0.000774232	0.972039	0.980145	171	0.977	0.994706
BIOCARTA_EIF4_PATHWAY	-0.0400732	0.52525	0.727181	21	0.572	0.815117		-0.0383927	0.000259981	0.0011395	758	0.182	0.647682
BIOCARTA_EPO_PATHWAY	-0.0514217	0.438051	0.639414	19	0.503	0.786426		-0.0375227	0.00745515	0.0196733	425	0.393	0.804138
BIOCARTA_EPONFKB_PATHWAY	-0.17419	0.045522	0.149421	11	0.102	0.436743		-0.0578829	0.0165475	0.0382087	143	0.231	0.685781
BIOCARTA_ERK_PATHWAY	-0.103477	0.0680455	0.197406	26	0.104	0.436743		-0.00719877	0.466929	0.568175	856	0.799	0.937099
BIOCARTA_ERK5_PATHWAY	-0.0591033	0.428263	0.632412	15	0.422	0.726611		-0.0551051	6.3308e-07	7.38593e-06	684	0.086	0.522283
BIOCARTA_ERYTH_PATHWAY	-0.182166	0.0146228	0.0712582	15	0.09	0.43452		-0.0115681	0.435296	0.541069	380	0.703	0.914613
BIOCARTA_ETC_PATHWAY	0.10976	0.20763	0.401629	11	NA	NA		-0.0101701	0.622088	0.715724	196	0.785	0.937099
BIOCARTA_ETS_PATHWAY	-0.120926	0.0758735	0.211744	18	0.097	0.436743		0.00437691	0.734256	0.80841	503	0.881	0.962802
BIOCARTA_EXTRINSIC_PATHWAY	-0.0792344	0.322772	0.527	13	0.57	0.814654		-0.012663	0.698528	0.780708	78	0.788	0.937099
BIOCARTA_FAS_PATHWAY	-0.0923914	0.0801816	0.218502	30	0.243	0.594931		-0.0435101	0.000145376	0.000718774	638	0.091	0.526217
BIOCARTA_FCER1_PATHWAY	-0.0744997	0.133213	0.304281	34	0.121	0.449375		-0.0357778	0.000153236	0.00074922	939	0.112	0.572151
BIOCARTA_FIBRINOLYSIS_PATHWAY	0.14312	0.0861514	0.227404	12	0.36	0.694121		0.0567495	0.00857516	0.0222154	179	0.11	0.571484
BIOCARTA_FMLP_PATHWAY	-0.0419493	0.412016	0.614146	32	0.407	0.725236		-0.0421675	2.68114e-05	0.000173947	831	0.017	0.321538
BIOCARTA_FREE_PATHWAY	-0.0406789	0.656095	0.823857	10	0.709	0.901125		-0.0199219	0.463364	0.564871	113	0.684	0.908811
BIOCARTA_G1_PATHWAY	-0.148954	0.00743909	0.0466601	27	0.069	0.394706		-0.0400742	0.000231101	0.00103142	707	0.066	0.471935
BIOCARTA_G2_PATHWAY	-0.230744	0.000129341	0.00234108	23	0.001	0.04828		-0.0413822	0.011425	0.0280356	312	0.163	0.624755
BIOCARTA_GATA3_PATHWAY	-0.148141	0.0470831	0.151635	15	0.105	0.436743		-0.00118584	0.937098	0.958999	370	0.973	0.993925
BIOCARTA_GCR_PATHWAY	-0.0297207	0.680788	0.837436	16	0.64	0.867955		0.00437872	0.750986	0.81828	439	0.885	0.964795
BIOCARTA_GH_PATHWAY	-0.0279553	0.62204	0.805853	26	0.682	0.895516		-0.0452476	1.31468e-05	9.60728e-05	777	0.177	0.639701
BIOCARTA_GLEEVEC_PATHWAY	0.00639958	0.915456	0.967554	23	0.92	0.983956		-0.0487729	0.000229554	0.00102797	477	0.072	0.478276
BIOCARTA_GLYCOLYSIS_PATHWAY	0.115924	0.204435	0.397524	10	NA	NA		-0.0573281	0.0103207	0.0258503	167	0.13	0.585728
BIOCARTA_GPCR_PATHWAY	-0.0824896	0.124548	0.292769	29	0.119	0.448421		-0.0353554	0.000164116	0.000784278	953	0.103	0.562276
BIOCARTA_GRANULOCYTES_PATHWAY	-0.120814	0.131641	0.303599	13	0.285	0.628876		-0.0690914	0.00212168	0.00683254	165	0.304	0.737283
BIOCARTA_GSK3_PATHWAY	-0.137423	0.0153798	0.0734392	26	0.063	0.378313		-0.0136888	0.232023	0.337627	638	0.55	0.861602
BIOCARTA_HCMV_PATHWAY	-0.170492	0.0223059	0.0948375	15	0.02	0.25096		-0.071054	5.18914e-07	6.21762e-06	417	0.001	0.147778
BIOCARTA_HDAC_PATHWAY	-0.108653	0.0656153	0.192441	24	0.104	0.436743		-0.0540559	1.00428e-09	2.8419e-08	1072	0.018	0.321538
BIOCARTA_HER2_PATHWAY	-0.0956169	0.12957	0.299571	21	0.157	0.50265		0.00116768	0.905633	0.938185	864	0.96	0.991304
BIOCARTA_HIF_PATHWAY	-0.0179032	0.823211	0.910925	13	0.812	0.941483		-0.0377518	0.0208214	0.0468307	313	0.133	0.585728
BIOCARTA_HIVNEF_PATHWAY	-0.128928	0.00086734	0.0100818	56	0.03	0.270224		-0.0578334	7.06232e-10	2.29095e-08	953	0.003	0.19
BIOCARTA_HSP27_PATHWAY	-0.10736	0.164452	0.347848	14	0.167	0.512898		-0.092036	1.28396e-08	2.47489e-07	319	0.025	0.342784
BIOCARTA_IGF1_PATHWAY	-0.115085	0.0680871	0.197406	21	0.127	0.457579		-0.0629891	6.62562e-09	1.46868e-07	710	0.002	0.16625
BIOCARTA_IGF1MTOR_PATHWAY	-0.0358605	0.588639	0.778502	19	0.616	0.857569		-0.056864	3.14853e-06	2.98402e-05	562	0.004	0.221667
BIOCARTA_IGF1R_PATHWAY	-0.0867867	0.168878	0.351023	21	0.199	0.556002		-0.0542435	9.76165e-06	7.43689e-05	556	0.079	0.495613
BIOCARTA_IL10_PATHWAY	-0.0739194	0.306224	0.507171	16	0.475	0.760378		-0.0506198	0.00337423	0.00997273	280	0.191	0.649693
BIOCARTA_IL12_PATHWAY	-0.204009	0.00093289	0.0106484	22	0.004	0.130486		-0.0714379	7.10716e-06	5.76373e-05	330	0.036	0.372803
BIOCARTA_IL17_PATHWAY	-0.189561	0.00869378	0.0514721	16	0.143	0.4828		0.0220889	0.147603	0.237954	359	0.573	0.867984
BIOCARTA_IL1R_PATHWAY	-0.163957	0.00113068	0.0118395	33	0.017	0.23317		-0.0494816	1.4223e-05	0.000102782	644	0.007	0.266
BIOCARTA_IL2_PATHWAY	-0.0997853	0.105446	0.258218	22	0.14	0.478697		-0.0353366	0.00868691	0.0223907	461	0.423	0.809007
BIOCARTA_IL22BP_PATHWAY	-0.137922	0.0562515	0.170913	16	0.12	0.448421		-0.0554584	0.00192908	0.00628842	261	0.141	0.591577
BIOCARTA_IL2RB_PATHWAY	-0.121016	0.0109607	0.0596019	37	0.017	0.23317		-0.0522832	3.00712e-08	5.19412e-07	942	0.054	0.432651
BIOCARTA_IL3_PATHWAY	-0.0420163	0.586382	0.776328	14	0.53	0.799638		-0.0317285	0.0543811	0.104974	307	0.525	0.851833
BIOCARTA_IL4_PATHWAY	-0.20639	0.017813	0.080992	11	NA	NA		-0.0603027	0.000161114	0.000776381	327	0.166	0.629408
BIOCARTA_IL5_PATHWAY	-0.183133	0.0449898	0.148353	10	0.064	0.380532		-0.0499659	0.0658815	0.123065	113	0.441	0.809007
BIOCARTA_IL6_PATHWAY	-0.158314	0.0102102	0.0564903	22	0.032	0.274697		-0.0296275	0.0230439	0.0506585	492	0.44	0.809007
BIOCARTA_IL7_PATHWAY	-0.103076	0.141404	0.317517	17	0.169	0.513811		-0.0536661	4.52319e-05	0.000269769	483	0.006	0.266
BIOCARTA_INFLAM_PATHWAY	-0.16233	0.00250617	0.0206189	29	0.06	0.367614		-0.0229123	0.0881623	0.157827	463	0.445	0.812981
BIOCARTA_INSULIN_PATHWAY	-0.0735503	0.243622	0.443327	21	0.31	0.655289		-0.0484684	3.20403e-05	0.000202876	616	0.077	0.495613
BIOCARTA_INTEGRIN_PATHWAY	0.0248058	0.617101	0.801093	34	0.688	0.895516		-0.0181281	0.0518474	0.100667	965	0.435	0.809007
BIOCARTA_INTRINSIC_PATHWAY	-0.103701	0.0853866	0.226328	23	0.327	0.6701		-0.011188	0.530812	0.628656	262	0.732	0.91875
BIOCARTA_KERATINOCYTE_PATHWAY	-0.133926	0.00214926	0.0185562	44	0.007	0.16898		-0.0375973	1.77558e-06	1.90445e-05	1358	0.138	0.591577
BIOCARTA_LAIR_PATHWAY	-0.195261	0.00533998	0.0367704	17	0.104	0.436743		-0.0458573	0.0278272	0.0597902	192	0.06	0.460966
BIOCARTA_LECTIN_PATHWAY	-0.117129	0.178719	0.364048	11	0.484	0.769681		0.0218487	0.251407	0.362658	230	0.403	0.807214
BIOCARTA_LEPTIN_PATHWAY	0.126191	0.14741	0.324815	11	0.2	0.556221		0.0188587	0.213815	0.317382	363	0.453	0.814428
BIOCARTA_LONGEVITY_PATHWAY	-0.137498	0.0653439	0.19209	15	0.033	0.274697		-0.0712063	1.05583e-08	2.06507e-07	540	0.004	0.221667
BIOCARTA_LYM_PATHWAY	-0.0803463	0.379104	0.579402	10	0.546	0.809555		0.024259	0.276328	0.387267	168	0.461	0.814428
BIOCARTA_MAL_PATHWAY	-0.0445769	0.550194	0.745477	15	0.568	0.814654		-0.0123511	0.407963	0.517371	375	0.756	0.924527
BIOCARTA_MAPK_PATHWAY	-0.0429447	0.17502	0.358289	84	0.375	0.70006		-0.0369425	6.67918e-10	2.22083e-08	2365	0.022	0.321538
BIOCARTA_MCALPAIN_PATHWAY	0.00219221	0.971626	0.98721	22	0.965	0.989495		-0.0181188	0.231054	0.336954	365	0.381	0.795495
BIOCARTA_MCM_PATHWAY	-0.222578	0.00108557	0.0116664	18	0.007	0.16898		0.0145537	0.34139	0.455415	357	0.622	0.878195
BIOCARTA_MEF2D_PATHWAY	-0.0524158	0.468127	0.671728	16	0.413	0.725236		-0.0262871	0.0350053	0.0732029	538	0.423	0.809007
BIOCARTA_MET_PATHWAY	-0.0321816	0.516581	0.716876	34	0.496	0.779521		-0.0459575	2.60386e-07	3.46313e-06	1054	0.005	0.255769
BIOCARTA_MITOCHONDRIA_PATHWAY	-0.0563516	0.371679	0.57405	21	0.416	0.725236		-0.0905114	5.39401e-11	2.86961e-09	439	0.009	0.278372
BIOCARTA_MONOCYTE_PATHWAY	-0.129266	0.157046	0.340132	10	0.38	0.700244		-0.0177785	0.474459	0.575233	135	0.626	0.878249
BIOCARTA_MPR_PATHWAY	-0.0498729	0.361484	0.564039	28	0.275	0.621582		-0.0291772	0.0124448	0.0300239	614	0.193	0.651497
BIOCARTA_MTA3_PATHWAY	0.0202371	0.760218	0.879631	19	0.762	0.920941		-0.0556767	0.000170046	0.000804844	381	0.096	0.543319
BIOCARTA_MTOR_PATHWAY	-0.000284477	0.996577	0.997364	19	1	1		-0.0329208	0.00519512	0.0143351	603	0.309	0.740486
BIOCARTA_MYOSIN_PATHWAY	0.000700477	0.989242	0.992741	31	0.989	0.99643		-0.01497	0.0954629	0.167621	1041	0.56	0.867593
BIOCARTA_NDKDYNAMIN_PATHWAY	0.0258483	0.756614	0.878641	12	0.775	0.926441		-0.0534463	0.00029083	0.00123976	384	0.026	0.3458
BIOCARTA_NFAT_PATHWAY	-0.0379723	0.37371	0.574624	46	0.404	0.721343		-0.03283	1.92149e-05	0.000132413	1426	0.092	0.529697
BIOCARTA_NFKB_PATHWAY	-0.234512	0.00010016	0.00192277	23	0.023	0.255138		-0.0487515	0.000949595	0.00338595	384	0.059	0.456221
BIOCARTA_NGF_PATHWAY	-0.0908705	0.182222	0.368222	18	0.269	0.620743		0.00132395	0.912825	0.941469	572	0.967	0.992889
BIOCARTA_NKCELLS_PATHWAY	0.0409876	0.536488	0.735639	19	0.615	0.857165		-0.0346269	0.0715647	0.132441	226	0.362	0.781348
BIOCARTA_NKT_PATHWAY	-0.248033	3.86736e-06	0.000158063	29	0.018	0.238747		-0.0377266	0.00330746	0.00979714	507	0.115	0.572846
BIOCARTA_NO1_PATHWAY	-0.119883	0.0381641	0.133611	25	0.107	0.436743		-0.0452116	1.83031e-06	1.94745e-05	934	0.038	0.38
BIOCARTA_NO2IL12_PATHWAY	-0.260278	0.000204526	0.00332097	17	0.01	0.188594		-0.028883	0.127816	0.213562	232	0.343	0.771176
BIOCARTA_NOS1_PATHWAY	0.0294483	0.674386	0.833353	17	0.737	0.908945		-0.0146761	0.159679	0.252826	769	0.621	0.878195
BIOCARTA_NTHI_PATHWAY	-0.147374	0.0144965	0.0709292	23	0.045	0.3195		-0.0486958	0.000181849	0.00084566	494	0.002	0.16625
BIOCARTA_NUCLEARRS_PATHWAY	0.16544	0.0321654	0.120217	14	0.102	0.436743		0.0120264	0.418549	0.527613	378	0.806	0.939509
BIOCARTA_P35ALZHEIMERS_PATHWAY	0.00880601	0.923204	0.967554	10	NA	NA		0.00157411	0.939189	0.960124	196	0.965	0.992889
BIOCARTA_P38MAPK_PATHWAY	-0.0122816	0.796268	0.898372	37	0.795	0.935249		-0.0448038	2.10547e-08	3.88927e-07	1315	0.018	0.321538
BIOCARTA_P53_PATHWAY	-0.146721	0.042267	0.142171	16	0.134	0.467451		-0.0630142	1.04103e-05	7.735e-05	409	0.035	0.372803
BIOCARTA_P53HYPOXIA_PATHWAY	-0.183053	0.00297788	0.02329	22	0.012	0.198411		-0.0107664	0.451874	0.554942	408	0.804	0.939509
BIOCARTA_PAR1_PATHWAY	-0.0202341	0.674783	0.833353	36	0.77	0.924766		-0.02432	0.0044812	0.0126505	1147	0.267	0.715948
BIOCARTA_PARKIN_PATHWAY	-0.126691	0.165477	0.348851	10	NA	NA		-0.0128601	0.365382	0.475996	414	0.666	0.900101
BIOCARTA_PDGF_PATHWAY	-0.0474078	0.353876	0.556076	32	0.465	0.753362		-0.0331738	0.000522164	0.00204258	917	0.221	0.668023
BIOCARTA_PGC1A_PATHWAY	0.0226503	0.732661	0.865128	19	0.724	0.905563		-0.0247959	0.0042209	0.012021	1118	0.211	0.655764
BIOCARTA_PITX2_PATHWAY	-0.133216	0.0845155	0.22496	14	0.183	0.537423		0.0123135	0.355867	0.468153	470	0.733	0.91875
BIOCARTA_PLATELETAPP_PATHWAY	-0.0753845	0.328972	0.531315	14	0.465	0.753362		0.01542	0.371867	0.482521	280	0.627	0.878275
BIOCARTA_PLCE_PATHWAY	-0.123948	0.174826	0.358289	10	NA	NA		-0.00912956	0.585484	0.683064	298	0.794	0.937099
BIOCARTA_PML_PATHWAY	-0.271301	0.000108557	0.00202267	17	0.005	0.147195		0.00223917	0.876882	0.91832	400	0.951	0.989213
BIOCARTA_PPARA_PATHWAY	0.00280678	0.943235	0.975574	54	0.932	0.986015		-0.0172432	0.0184527	0.0419523	1573	0.183	0.647682
BIOCARTA_PROTEASOME_PATHWAY	0.000814194	0.990203	0.992741	19	0.992	0.996956		-0.0320886	0.00306663	0.00922764	713	0.174	0.635769
BIOCARTA_PS1_PATHWAY	-0.114735	0.137343	0.311295	14	0.146	0.48546		0.0146453	0.264662	0.376471	485	0.649	0.889856
BIOCARTA_PTC1_PATHWAY	-0.155051	0.0750637	0.210411	11	0.155	0.500777		-0.0314709	0.0428183	0.085508	346	0.302	0.736991
BIOCARTA_PTDINS_PATHWAY	-0.0356965	0.571467	0.76619	21	0.645	0.869849		-0.0328634	0.00558317	0.0151871	595	0.36	0.781077
BIOCARTA_PTEN_PATHWAY	-0.135316	0.0535397	0.167081	17	0.111	0.437833		-0.032931	0.0136418	0.0324573	469	0.28	0.721054
BIOCARTA_PYK2_PATHWAY	0.0211545	0.720008	0.861853	24	0.782	0.930198		-0.0288876	0.0085855	0.0222154	693	0.294	0.73311
BIOCARTA_RAC1_PATHWAY	0.0253957	0.673553	0.833353	23	0.712	0.901767		-0.0394997	0.000708604	0.00264731	615	0.049	0.409874
BIOCARTA_RACCYCD_PATHWAY	-0.13016	0.0274219	0.109948	24	0.181	0.532846		-0.0475126	0.000164522	0.000784278	526	0.036	0.372803
BIOCARTA_RANKL_PATHWAY	-0.252297	0.00108653	0.0116664	14	0.023	0.255138		-0.0100265	0.558017	0.655042	285	0.741	0.924527
BIOCARTA_RARRXR_PATHWAY	-0.00786518	0.921813	0.967554	13	0.93	0.985522		0.0397907	0.00227078	0.00719079	492	0.138	0.591577
BIOCARTA_RAS_PATHWAY	-0.054017	0.403302	0.605431	20	0.455	0.749229		-0.0407011	0.00304561	0.00922701	443	0.167	0.629408
BIOCARTA_RB_PATHWAY	-0.142036	0.0763125	0.212501	13	NA	NA		-0.0659034	0.000277653	0.00121075	254	0.07	0.478276
BIOCARTA_RELA_PATHWAY	-0.227575	0.00228682	0.0190619	15	0.02	0.25096		0.0061791	0.748879	0.817683	224	0.854	0.956883
BIOCARTA_RHO_PATHWAY	0.0837191	0.125563	0.294608	28	0.256	0.611865		0.00901922	0.33787	0.451625	947	0.687	0.91007
BIOCARTA_RNA_PATHWAY	-0.226809	0.0130327	0.0673978	10	NA	NA		-0.0440687	0.0460311	0.0906049	171	0.221	0.668023
BIOCARTA_SARS_PATHWAY	0.0556411	0.542457	0.741417	10	NA	NA		-0.0309124	0.282014	0.392341	101	0.484	0.826391
BIOCARTA_SET_PATHWAY	-0.179813	0.0490215	0.156449	10	NA	NA		-0.0239177	0.270623	0.38128	177	0.456	0.814428
BIOCARTA_SHH_PATHWAY	-0.0491969	0.509645	0.709583	15	0.552	0.809555		0.00762657	0.507159	0.608224	633	0.854	0.956883
BIOCARTA_SODD_PATHWAY	-0.303438	0.000894612	0.0103043	10	0.019	0.249272		-0.0292954	0.352457	0.465452	84	0.527	0.851833
BIOCARTA_SPPA_PATHWAY	-0.0048708	0.938452	0.973807	21	0.928	0.985522		-0.0112757	0.354945	0.467866	563	0.755	0.924527
BIOCARTA_SPRY_PATHWAY	-0.0720826	0.303764	0.503755	17	0.282	0.626754		-0.0147372	0.278497	0.389077	452	0.531	0.851833
BIOCARTA_SRCRPTP_PATHWAY	-0.229022	0.008556	0.0513766	11	NA	NA		-0.0372641	0.0214787	0.0480921	318	0.285	0.723378
BIOCARTA_STATHMIN_PATHWAY	-0.0607598	0.37243	0.57405	18	0.454	0.749229		-0.00977467	0.46936	0.570611	458	0.746	0.924527
BIOCARTA_STEM_PATHWAY	-0.209099	0.00506961	0.0350995	15	0.104	0.436743		-0.045339	0.0118813	0.0288888	257	0.339	0.768092
BIOCARTA_STRESS_PATHWAY	-0.0953842	0.0990577	0.248527	25	0.218	0.568307		-0.036648	0.00288427	0.00881858	553	0.045	0.409874
BIOCARTA_TALL1_PATHWAY	-0.14303	0.0640032	0.189026	14	0.111	0.437833		-0.0674395	0.000619341	0.00235838	215	0.079	0.495613
BIOCARTA_TCAPOPTOSIS_PATHWAY	-0.172155	0.0594874	0.178181	10	0.224	0.572814		-0.0404835	0.102113	0.17753	136	0.427	0.809007
BIOCARTA_TCR_PATHWAY	-0.0473861	0.2887	0.489698	42	0.292	0.640807		-0.0271423	0.00143751	0.00485251	1158	0.147	0.601569
BIOCARTA_TCRA_PATHWAY	0.0302659	0.716681	0.859882	12	0.798	0.936951		-0.00268283	0.892438	0.92875	212	0.929	0.981667
BIOCARTA_TCYTOTOXIC_PATHWAY	-0.14484	0.0706881	0.202171	13	0.382	0.702857		-0.0121253	0.553763	0.650623	199	0.846	0.954351
BIOCARTA_TEL_PATHWAY	-0.164973	0.0185901	0.0832285	17	0.018	0.238747		-0.0400245	0.00127324	0.00439848	542	0.251	0.705772
BIOCARTA_TFF_PATHWAY	-0.0708349	0.285405	0.489321	19	0.202	0.560005		-0.0480362	0.000578364	0.00222963	429	0.104	0.562276
BIOCARTA_TGFB_PATHWAY	-0.180139	0.0101691	0.0564903	17	0.043	0.312657		-0.0532555	1.02758e-05	7.72133e-05	574	0.021	0.321538
BIOCARTA_TH1TH2_PATHWAY	-0.35644	7.63893e-08	5.37696e-06	19	0.001	0.04828		-0.0548934	0.00159865	0.00530225	276	0.108	0.570748
BIOCARTA_THELPER_PATHWAY	-0.135814	0.090105	0.232558	13	0.393	0.712981		-0.00688945	0.726575	0.80225	215	0.903	0.97008
BIOCARTA_TID_PATHWAY	-0.127021	0.0622354	0.185741	18	0.065	0.382707		-0.0301154	0.0409248	0.0830531	385	0.494	0.831671
BIOCARTA_TNFR1_PATHWAY	-0.052921	0.324432	0.528545	29	0.445	0.745993		-0.0478052	4.8742e-05	0.000287739	604	0.031	0.368125
BIOCARTA_TNFR2_PATHWAY	-0.15572	0.0222596	0.0948375	18	0.079	0.414578		-0.0412274	0.0086269	0.0222792	339	0.072	0.478276
BIOCARTA_TOB1_PATHWAY	-0.132154	0.04626	0.150189	19	0.116	0.448421		-0.0568963	7.69088e-06	6.05258e-05	517	0.012	0.310333
BIOCARTA_TOLL_PATHWAY	-0.141421	0.00295007	0.0232158	37	0.036	0.285868		-0.0429984	0.00012252	0.000614913	668	0.015	0.311719
BIOCARTA_TPO_PATHWAY	-0.0217891	0.711978	0.859424	24	0.728	0.908361		-0.0306496	0.00500985	0.0139104	702	0.368	0.781853
BIOCARTA_TRKA_PATHWAY	-0.0336437	0.686655	0.842199	12	0.737	0.908945		-0.0218867	0.095862	0.16798	484	0.592	0.87128
BIOCARTA_UCALPAIN_PATHWAY	0.130869	0.0700696	0.200856	16	0.093	0.435081		-0.0297143	0.0763721	0.139718	297	0.397	0.806122
BIOCARTA_VDR_PATHWAY	-0.0744465	0.372051	0.57405	12	0.521	0.799638		-0.00657809	0.698261	0.780708	290	0.873	0.958608
BIOCARTA_VEGF_PATHWAY	-0.00110789	0.984117	0.992017	27	0.978	0.991971		-0.0305789	0.00298424	0.00908248	790	0.344	0.771176
BIOCARTA_VIP_PATHWAY	-0.135304	0.0281422	0.110918	22	0.082	0.424781		-0.0356511	0.000838298	0.00306598	735	0.099	0.550921
BIOCARTA_VITCB_PATHWAY	-0.0114483	0.895433	0.959014	11	0.934	0.986015		-0.0196905	0.332654	0.446448	202	0.537	0.851833
BIOCARTA_WNT_PATHWAY	-0.0797165	0.168048	0.351023	25	0.265	0.619811		0.00855184	0.366791	0.476399	934	0.758	0.924899
KEGG_ABC_TRANSPORTERS	0.13975	0.0013636	0.0137117	44	0.029	0.265174		0.00761495	0.48844	0.589496	693	0.767	0.927373
KEGG_ACUTE_MYELOID_LEUKEMIA	-0.038372	0.325919	0.528732	55	0.54	0.807658		-0.0100833	0.132462	0.220218	1879	0.647	0.889856
KEGG_ADHERENS_JUNCTION	-0.0881126	0.0142553	0.0708294	65	0.064	0.380532		-0.0126683	0.0120992	0.029258	3345	0.27	0.716766
KEGG_ADIPOCYTOKINE_SIGNALING_PATHWAY	0.00873507	0.80519	0.903357	67	0.823	0.947136		-0.0198331	0.00826026	0.0214573	1493	0.47	0.819266
KEGG_ALANINE_ASPARTATE_AND_GLUTAMATE_METABOLISM	0.0968424	0.0623047	0.185741	31	0.186	0.538374		-0.00285647	0.823306	0.874599	511	0.891	0.966488
KEGG_ALDOSTERONE_REGULATED_SODIUM_REABSORPTION	-0.093407	0.0438326	0.146147	39	0.06	0.367614		-0.0172253	0.0408579	0.0830531	1184	0.522	0.850809
KEGG_ALLOGRAFT_REJECTION	-0.0464277	0.335664	0.538338	36	0.659	0.881217		-0.0339985	0.0236609	0.0518844	370	0.265	0.713462
KEGG_ALPHA_LINOLENIC_ACID_METABOLISM	0.139772	0.0401886	0.137992	18	0.099	0.436743		-0.0302243	0.181557	0.280128	163	0.469	0.818596
KEGG_ALZHEIMERS_DISEASE	0.0554534	0.0205982	0.0901912	148	0.266	0.619811		-0.0187682	0.000178846	0.000834615	3400	0.226	0.675461
KEGG_AMINO_SUGAR_AND_NUCLEOTIDE_SUGAR_METABOLISM	0.0125336	0.776463	0.891103	43	0.858	0.958042		0.0402984	4.94495e-05	0.000289726	850	0.219	0.668023
KEGG_AMINOACYL_TRNA_BIOSYNTHESIS	0.131247	0.00368879	0.0267069	41	0.156	0.500777		0.00517179	0.622048	0.715724	761	0.86	0.958608
KEGG_AMYOTROPHIC_LATERAL_SCLEROSIS_ALS	0.0257328	0.525728	0.727181	51	0.553	0.810038		-0.0219441	0.00672929	0.0179718	1282	0.282	0.721054
KEGG_ANTIGEN_PROCESSING_AND_PRESENTATION	0.0155214	0.643047	0.814741	75	0.956	0.989495		-0.0316891	0.00265922	0.00818695	753	0.464	0.814428
KEGG_APOPTOSIS	-0.143611	7.40645e-06	0.000253621	82	0.059	0.367614		-0.0333976	3.87047e-06	3.47819e-05	1611	0.102	0.560579
KEGG_ARACHIDONIC_ACID_METABOLISM	0.124024	0.00135682	0.0137117	56	0.073	0.400505		-0.0153577	0.214672	0.317944	546	0.534	0.851833
KEGG_ARGININE_AND_PROLINE_METABOLISM	0.10642	0.00747714	0.0466676	53	0.067	0.386933		-0.0121653	0.169995	0.266233	1068	0.588	0.87128
KEGG_ARRHYTHMOGENIC_RIGHT_VENTRICULAR_CARDIOMYOPATHY_ARVC	0.0680807	0.0463619	0.150189	72	0.233	0.587121		-0.00709518	0.125428	0.21063	3995	0.55	0.861602
KEGG_ASCORBATE_AND_ALDARATE_METABOLISM	0.218129	0.00185804	0.0168153	17	0.349	0.690278		0.0394898	0.255936	0.367201	69	0.466	0.814428
KEGG_ASTHMA	-0.0270356	0.620826	0.805104	28	0.801	0.937737		-0.0159094	0.310088	0.424937	340	0.691	0.913549
KEGG_AUTOIMMUNE_THYROID_DISEASE	0.00258062	0.949261	0.979468	51	0.996	0.998482		-0.0435253	0.0025367	0.00786435	402	0.129	0.585728
KEGG_AXON_GUIDANCE	0.0380925	0.151393	0.331861	120	0.442	0.741994		0.00174642	0.61185	0.707003	7406	0.893	0.966488
KEGG_B_CELL_RECEPTOR_SIGNALING_PATHWAY	-0.0740814	0.0325481	0.121234	70	0.144	0.4828		-0.029403	5.15816e-05	0.000300892	1597	0.09	0.526217
KEGG_BASAL_CELL_CARCINOMA	-0.0826193	0.0344173	0.126031	55	0.192	0.546566		-0.00499885	0.407056	0.517173	2329	0.839	0.953735
KEGG_BASAL_TRANSCRIPTION_FACTORS	-0.120627	0.0246984	0.100945	29	0.137	0.472454		-0.0277113	0.0460874	0.0906049	433	0.171	0.63175
KEGG_BASE_EXCISION_REPAIR	-0.0522402	0.306971	0.507744	32	0.332	0.673486		0.0195229	0.0952699	0.167621	611	0.465	0.814428
KEGG_BETA_ALANINE_METABOLISM	0.105896	0.0857694	0.226868	22	0.274	0.621582		-0.0044789	0.716955	0.793303	548	0.903	0.97008
KEGG_BIOSYNTHESIS_OF_UNSATURATED_FATTY_ACIDS	0.166927	0.00813849	0.0495743	21	0.152	0.499902		0.00566798	0.782475	0.844032	198	0.862	0.958608
KEGG_BLADDER_CANCER	-0.0888501	0.0521787	0.164454	40	0.167	0.512898		-0.0297593	0.00132754	0.00455058	976	0.365	0.781348
KEGG_BUTANOATE_METABOLISM	0.18809	0.000150054	0.00264053	34	0.051	0.34778		-0.00513634	0.741685	0.813225	344	0.78	0.934595
KEGG_CALCIUM_SIGNALING_PATHWAY	0.0457953	0.0401455	0.137992	171	0.354	0.693633		-0.0120712	0.00543789	0.0148509	4560	0.368	0.781853
KEGG_CARDIAC_MUSCLE_CONTRACTION	-0.0040155	0.908411	0.966378	69	0.946	0.989447		-0.00147252	0.810162	0.863394	2252	0.952	0.989213
KEGG_CELL_ADHESION_MOLECULES_CAMS	-0.0131452	0.605221	0.789717	131	0.738	0.908945		0.0109384	0.00810592	0.0210976	5055	0.434	0.809007
KEGG_CELL_CYCLE	-0.177926	6.41301e-11	5.80377e-09	114	0.005	0.147195		-0.0398861	1.84387e-11	1.29071e-09	2403	0.003	0.19
KEGG_CHEMOKINE_SIGNALING_PATHWAY	-0.0611408	0.00558685	0.0378532	175	0.055	0.360788		-0.0267133	2.8576e-08	5.0008e-07	3689	0.273	0.717569
KEGG_CHRONIC_MYELOID_LEUKEMIA	-0.0897158	0.00963267	0.0544506	70	0.104	0.436743		-0.0563193	3.12563e-21	3.01303e-18	2389	0.008	0.272821
KEGG_CIRCADIAN_RHYTHM_MAMMAL	-0.0096894	0.903758	0.964668	13	0.925	0.985415		0.00544747	0.749441	0.817683	287	0.894	0.966488
KEGG_CITRATE_CYCLE_TCA_CYCLE	0.22299	2.41294e-05	0.000636916	30	0.011	0.19242		-0.0124598	0.316302	0.428278	541	0.626	0.878249
KEGG_COLORECTAL_CANCER	-0.0838316	0.0289192	0.112051	57	0.072	0.400505		-0.0133965	0.0372026	0.076951	2044	0.248	0.705772
KEGG_COMPLEMENT_AND_COAGULATION_CASCADES	-0.10314	0.00335019	0.0248227	68	0.325	0.668271		0.0233444	0.0281073	0.0600044	741	0.286	0.724533
KEGG_CYSTEINE_AND_METHIONINE_METABOLISM	0.0982012	0.0548069	0.168545	32	0.044	0.314249		-0.0204059	0.120905	0.204066	483	0.593	0.87128
KEGG_CYTOKINE_CYTOKINE_RECEPTOR_INTERACTION	-0.202269	5.43577e-28	1.37742e-25	253	0.001	0.04828		-0.00732196	0.114767	0.196196	3973	0.722	0.915405
KEGG_CYTOSOLIC_DNA_SENSING_PATHWAY	-0.100253	0.0102703	0.056576	55	0.177	0.524912		-0.0169382	0.185048	0.283263	512	0.402	0.807214
KEGG_DILATED_CARDIOMYOPATHY	0.039095	0.211618	0.406243	86	0.462	0.753362		-0.00675686	0.16851	0.264603	3546	0.6	0.87128
KEGG_DNA_REPLICATION	-0.1023	0.0338899	0.124821	36	0.108	0.436743		-0.00761641	0.454785	0.557478	807	0.772	0.930879
KEGG_DORSO_VENTRAL_AXIS_FORMATION	-0.0274225	0.649182	0.820871	23	0.615	0.857165		0.0138682	0.270948	0.381334	527	0.721	0.91501
KEGG_DRUG_METABOLISM_CYTOCHROME_P450	0.18557	7.03106e-07	3.71181e-05	60	0.272	0.621582		0.0197312	0.193375	0.292593	363	0.537	0.851833
KEGG_DRUG_METABOLISM_OTHER_ENZYMES	0.109189	0.0157082	0.0745406	41	0.569	0.814654		-0.0045729	0.676731	0.76227	696	0.875	0.958608
KEGG_ECM_RECEPTOR_INTERACTION	0.111287	0.00047613	0.00621418	83	0.038	0.294013		-0.00444326	0.439497	0.544256	2567	0.716	0.914613
KEGG_ENDOCYTOSIS	-0.00505327	0.820848	0.910925	171	0.861	0.958042		-0.022185	1.71539e-07	2.4271e-06	4782	0.295	0.73311
KEGG_ENDOMETRIAL_CANCER	-0.0888886	0.0299747	0.114048	50	0.084	0.427479		-0.0142923	0.0256539	0.0557511	2060	0.212	0.655764
KEGG_EPITHELIAL_CELL_SIGNALING_IN_HELICOBACTER_PYLORI_INFECTION	-0.0371222	0.294569	0.496963	67	0.564	0.814654		-0.0322141	0.000156252	0.000755831	1157	0.113	0.572151
KEGG_ERBB_SIGNALING_PATHWAY	-0.0334761	0.287589	0.489698	85	0.429	0.733432		-0.00204119	0.701051	0.782212	3009	0.896	0.966488
KEGG_ETHER_LIPID_METABOLISM	0.0813783	0.111515	0.269124	32	0.119	0.448421		-0.0419259	0.000372087	0.00153212	603	0.073	0.478276
KEGG_FATTY_ACID_METABOLISM	0.163743	0.000246175	0.00385066	42	0.303	0.65025		-0.00330846	0.817177	0.868781	408	0.908	0.97008
KEGG_FC_EPSILON_RI_SIGNALING_PATHWAY	-0.00507257	0.879614	0.950103	75	0.883	0.968012		-0.0289618	8.66045e-05	0.000460736	1547	0.187	0.647682
KEGG_FC_GAMMA_R_MEDIATED_PHAGOCYTOSIS	0.001195	0.969022	0.985354	89	0.968	0.989495		-0.0309044	2.01816e-07	2.73893e-06	2396	0.136	0.587273
KEGG_FOCAL_ADHESION	0.0237664	0.262153	0.460677	190	0.489	0.773111		-0.0178282	3.58279e-06	3.28628e-05	5863	0.113	0.572151
KEGG_FOLATE_BIOSYNTHESIS	0.014986	0.8634	0.936951	11	0.897	0.976266		-0.017999	0.383031	0.494593	196	0.648	0.889856
KEGG_FRUCTOSE_AND_MANNOSE_METABOLISM	0.0522099	0.299842	0.502139	33	0.463	0.753362		0.0446557	7.51912e-05	0.00041154	658	0.283	0.721054
KEGG_GALACTOSE_METABOLISM	0.00442205	0.937845	0.973807	26	0.969	0.989495		0.00923733	0.509575	0.610572	426	0.729	0.918543
KEGG_GAP_JUNCTION	0.0119101	0.708468	0.858623	83	0.76	0.920941		-0.0125132	0.0338599	0.0713688	2436	0.402	0.807214
KEGG_GLIOMA	-0.0722899	0.0533109	0.166778	60	0.198	0.555781		-0.02576	0.000194958	0.000895468	1764	0.21	0.655764
KEGG_GLUTATHIONE_METABOLISM	0.107381	0.00943803	0.0541085	49	0.075	0.404129		0.008526	0.492501	0.593859	542	0.704	0.914613
KEGG_GLYCEROLIPID_METABOLISM	0.0418281	0.311955	0.513307	49	0.484	0.769681		-0.013732	0.109618	0.188118	1140	0.477	0.82498
KEGG_GLYCEROPHOSPHOLIPID_METABOLISM	0.0404997	0.226565	0.424928	75	0.453	0.749229		-0.0240812	0.000868626	0.00315648	1611	0.114	0.572151
KEGG_GLYCINE_SERINE_AND_THREONINE_METABOLISM	0.0839147	0.106251	0.258885	31	0.301	0.65025		0.0143187	0.217036	0.321088	622	0.701	0.914613
KEGG_GLYCOLYSIS_GLUCONEOGENESIS	0.143579	0.000141145	0.00251874	59	0.078	0.411118		-0.0325374	0.00162394	0.00537275	786	0.189	0.649535
KEGG_GLYCOSAMINOGLYCAN_BIOSYNTHESIS_CHONDROITIN_SULFATE	0.0782728	0.204096	0.397524	22	0.305	0.65025		0.045187	0.000147908	0.000728582	590	0.17	0.631564
KEGG_GLYCOSAMINOGLYCAN_BIOSYNTHESIS_HEPARAN_SULFATE	0.0748089	0.18711	0.374914	26	0.375	0.70006		0.0460815	7.75328e-09	1.6632e-07	1320	0.04	0.382734
KEGG_GLYCOSAMINOGLYCAN_BIOSYNTHESIS_KERATAN_SULFATE	-0.0401681	0.590317	0.778908	15	0.793	0.933806		0.00328642	0.839046	0.887774	319	0.926	0.981339
KEGG_GLYCOSAMINOGLYCAN_DEGRADATION	-0.0442219	0.483276	0.68653	21	0.667	0.881784		0.039201	0.00402393	0.0116092	450	0.143	0.596207
KEGG_GLYCOSPHINGOLIPID_BIOSYNTHESIS_GANGLIO_SERIES	-0.077724	0.297531	0.499963	15	0.383	0.703624		-0.0278626	0.0280139	0.059901	520	0.596	0.87128
KEGG_GLYCOSPHINGOLIPID_BIOSYNTHESIS_GLOBO_SERIES	-0.116908	0.144589	0.321394	13	0.134	0.467451		-0.0390401	0.141974	0.231688	118	0.283	0.721054
KEGG_GLYCOSPHINGOLIPID_BIOSYNTHESIS_LACTO_AND_NEOLACTO_SERIES	-0.15774	0.00540964	0.0370487	26	0.044	0.314249		0.021123	0.184924	0.283263	329	0.35	0.772541
KEGG_GLYCOSYLPHOSPHATIDYLINOSITOL_GPI_ANCHOR_BIOSYNTHESIS	-0.146471	0.0113136	0.0612084	25	0.043	0.312657		-0.0326081	0.0124611	0.0300239	491	0.202	0.652212
KEGG_GLYOXYLATE_AND_DICARBOXYLATE_METABOLISM	0.0815582	0.258935	0.457128	16	0.358	0.694121		0.00500327	0.762744	0.826294	304	0.838	0.953413
KEGG_GNRH_SIGNALING_PATHWAY	0.0442662	0.141523	0.317517	93	0.26	0.616491		-0.0226132	0.000171527	0.000808976	2338	0.333	0.763603
KEGG_GRAFT_VERSUS_HOST_DISEASE	0.00681559	0.889161	0.955527	35	0.97	0.989679		-0.034426	0.0895171	0.159381	203	0.288	0.726597
KEGG_HEDGEHOG_SIGNALING_PATHWAY	-0.0872082	0.0283842	0.110918	53	0.169	0.513811		-0.0123226	0.0465028	0.0912222	2208	0.598	0.87128
KEGG_HEMATOPOIETIC_CELL_LINEAGE	-0.149701	1.97946e-06	9.64605e-05	85	0.056	0.365362		-0.00212787	0.785127	0.844837	1381	0.933	0.983273
KEGG_HISTIDINE_METABOLISM	0.0334703	0.533141	0.732635	29	0.632	0.8637		0.00176516	0.905737	0.938185	376	0.925	0.981061
KEGG_HOMOLOGOUS_RECOMBINATION	-0.101815	0.0673267	0.197004	27	0.177	0.524912		-0.0280608	0.00429783	0.0122139	868	0.218	0.666529
KEGG_HUNTINGTONS_DISEASE	-0.00910315	0.694723	0.84799	158	0.864	0.9585		-0.0367732	9.78593e-16	1.85933e-13	4086	0.049	0.409874
KEGG_HYPERTROPHIC_CARDIOMYOPATHY_HCM	0.044682	0.168372	0.351023	80	0.394	0.712981		-0.00953213	0.0558242	0.107142	3434	0.508	0.840348
KEGG_INOSITOL_PHOSPHATE_METABOLISM	-0.0176415	0.654481	0.823518	54	0.664	0.881681		-0.00308493	0.703555	0.782381	1279	0.855	0.957197
KEGG_INSULIN_SIGNALING_PATHWAY	-0.00761717	0.76626	0.8842	129	0.844	0.952776		-0.0152003	0.00323062	0.0096773	3197	0.486	0.826391
KEGG_INTESTINAL_IMMUNE_NETWORK_FOR_IGA_PRODUCTION	-0.135784	0.00146826	0.0142893	46	0.022	0.255138		-0.0195956	0.0558268	0.107142	798	0.392	0.804138
KEGG_JAK_STAT_SIGNALING_PATHWAY	-0.157189	5.27695e-11	5.143e-09	148	0.002	0.0754375		-0.0267863	3.39868e-06	3.15337e-05	2550	0.155	0.615373
KEGG_LEISHMANIA_INFECTION	-0.0744307	0.0329713	0.122148	69	0.072	0.400505		-0.0289128	0.00143409	0.00485251	1020	0.133	0.585728
KEGG_LEUKOCYTE_TRANSENDOTHELIAL_MIGRATION	0.0409224	0.141592	0.317517	109	0.39	0.712981		-0.00978414	0.0596925	0.113578	3154	0.555	0.864344
KEGG_LINOLEIC_ACID_METABOLISM	0.177433	0.00215293	0.0185562	25	0.032	0.274697		-0.0272196	0.175206	0.272543	207	0.314	0.744421
KEGG_LONG_TERM_DEPRESSION	0.0196159	0.582495	0.77467	66	0.649	0.873292		-0.031144	1.62359e-07	2.32191e-06	2396	0.088	0.5225
KEGG_LONG_TERM_POTENTIATION	0.0316057	0.398191	0.599965	60	0.526	0.799638		-0.0106047	0.0844486	0.152191	2240	0.625	0.878249
KEGG_LYSINE_DEGRADATION	-0.0540138	0.2211	0.418735	43	0.365	0.699294		-0.0226413	0.0423506	0.0849687	673	0.411	0.808624
KEGG_LYSOSOME	-0.031746	0.237686	0.437716	117	0.619	0.859762		-0.0182179	0.010565	0.0263629	1660	0.458	0.814428
KEGG_MAPK_SIGNALING_PATHWAY	-0.0124644	0.49666	0.696864	256	0.738	0.908945		-0.029546	4.94464e-19	2.19212e-16	8019	0.035	0.372803
KEGG_MATURITY_ONSET_DIABETES_OF_THE_YOUNG	0.0547837	0.353269	0.556076	24	0.317	0.66063		0.012937	0.176799	0.273739	914	0.592	0.87128
KEGG_MELANOGENESIS	-0.049151	0.102601	0.253402	93	0.237	0.593483		-0.0158343	0.00180132	0.00591546	3312	0.458	0.814428
KEGG_MELANOMA	-0.0869393	0.0127455	0.0664551	69	0.156	0.500777		-0.0188738	0.00121409	0.00423817	2491	0.318	0.748566
KEGG_METABOLISM_OF_XENOBIOTICS_BY_CYTOCHROME_P450	0.20266	1.28367e-07	8.56005e-06	57	0.225	0.574154		0.00108868	0.943421	0.963709	355	0.972	0.993666
KEGG_MISMATCH_REPAIR	-0.143437	0.0173408	0.0796511	23	0.085	0.427479		0.00861635	0.55207	0.649951	398	0.695	0.914613
KEGG_MTOR_SIGNALING_PATHWAY	-0.0671473	0.101097	0.252145	50	0.199	0.556002		-0.0311973	0.000255323	0.00112444	1154	0.259	0.708429
KEGG_N_GLYCAN_BIOSYNTHESIS	-0.0117999	0.786865	0.896424	44	0.867	0.959183		0.00925417	0.312588	0.42684	999	0.538	0.851833
KEGG_NATURAL_KILLER_CELL_MEDIATED_CYTOTOXICITY	-0.0232821	0.382534	0.582724	119	0.71	0.901125		-0.0196304	0.00493858	0.0137412	1729	0.289	0.726597
KEGG_NEUROACTIVE_LIGAND_RECEPTOR_INTERACTION	0.0654619	0.000262324	0.00395672	268	0.193	0.54812		0.00932795	0.0147074	0.0346211	5938	0.411	0.808624
KEGG_NEUROTROPHIN_SIGNALING_PATHWAY	-0.0613561	0.0242519	0.0997637	114	0.11	0.436743		-0.0248698	1.19975e-06	1.36382e-05	3248	0.177	0.639701
KEGG_NICOTINATE_AND_NICOTINAMIDE_METABOLISM	0.0199863	0.751366	0.877949	21	0.847	0.952776		-0.0144365	0.292716	0.405533	444	0.616	0.877173
KEGG_NITROGEN_METABOLISM	-0.0179389	0.771008	0.888061	22	0.809	0.941483		0.0158033	0.2982	0.412273	362	0.604	0.87128
KEGG_NOD_LIKE_RECEPTOR_SIGNALING_PATHWAY	-0.116639	0.00166897	0.0154257	61	0.026	0.255138		-0.0201438	0.0715275	0.132441	670	0.25	0.705772
KEGG_NON_HOMOLOGOUS_END_JOINING	0.0250138	0.754925	0.87832	13	0.856	0.958042		-0.0307004	0.0478454	0.0937179	347	0.385	0.797586
KEGG_NON_SMALL_CELL_LUNG_CANCER	-0.0661128	0.0997505	0.249771	52	0.28	0.626754		0.00737935	0.232462	0.337877	2215	0.59	0.87128
KEGG_NOTCH_SIGNALING_PATHWAY	-0.0808232	0.0556551	0.170739	47	0.186	0.538374		-0.0265487	0.000591124	0.00227224	1409	0.402	0.807214
KEGG_NUCLEOTIDE_EXCISION_REPAIR	-0.104599	0.0206637	0.0901912	41	0.067	0.386933		-0.00145649	0.886828	0.924666	800	0.94	0.985185
KEGG_O_GLYCAN_BIOSYNTHESIS	-0.111157	0.0457867	0.149515	27	0.159	0.506367		0.0337648	0.00138772	0.00470832	751	0.118	0.579114
KEGG_OLFACTORY_TRANSDUCTION	0.270003	1.20813e-69	1.53071e-66	373	0.065	0.382707		-0.00955013	1.53826e-06	1.70491e-05	25501	0.651	0.889856
KEGG_ONE_CARBON_POOL_BY_FOLATE	0.0924224	0.187309	0.374914	17	0.25	0.602295		0.00721766	0.665815	0.754931	299	0.791	0.937099
KEGG_OOCYTE_MEIOSIS	-0.10557	0.0004547	0.00606426	93	0	0		-0.0342875	4.6141e-09	1.09585e-07	2476	0.013	0.310333
KEGG_OTHER_GLYCAN_DEGRADATION	-0.178871	0.01329	0.0682026	16	0.12	0.448421		0.0204404	0.286422	0.397227	227	0.522	0.850809
KEGG_OXIDATIVE_PHOSPHORYLATION	0.0325371	0.238311	0.438229	111	0.634	0.8637		-0.0191822	0.00368634	0.0107283	1935	0.264	0.712211
KEGG_P53_SIGNALING_PATHWAY	-0.132342	0.000186447	0.00314506	67	0.025	0.255138		-0.0589068	6.59349e-12	5.48083e-10	1141	0.001	0.147778
KEGG_PANCREATIC_CANCER	-0.0855851	0.0181654	0.0819057	64	0.136	0.471701		-0.0321444	2.57831e-06	2.48489e-05	1805	0.065	0.467297
KEGG_PANTOTHENATE_AND_COA_BIOSYNTHESIS	-0.0218141	0.762693	0.88169	16	0.792	0.933806		-0.0290584	0.0204724	0.0462279	532	0.539	0.852402
KEGG_PARKINSONS_DISEASE	0.020542	0.464696	0.668298	107	0.767	0.924766		-0.0306759	1.64493e-06	1.80807e-05	2063	0.051	0.418704
KEGG_PATHOGENIC_ESCHERICHIA_COLI_INFECTION	0.0611073	0.152285	0.332664	46	0.283	0.626754		0.0197184	0.0379501	0.0781326	929	0.332	0.763603
KEGG_PATHWAYS_IN_CANCER	-0.0699392	2.57061e-05	0.000664688	314	0.028	0.261984		-0.0190151	2.52416e-11	1.53281e-09	11091	0.128	0.585728
KEGG_PENTOSE_AND_GLUCURONATE_INTERCONVERSIONS	0.171468	0.00971258	0.0544506	19	0.276	0.622677		0.00315955	0.906602	0.93835	115	0.941	0.985457
KEGG_PENTOSE_PHOSPHATE_PATHWAY	0.146918	0.00957703	0.0544506	26	0.026	0.255138		-0.00386192	0.754375	0.819555	549	0.887	0.965393
KEGG_PEROXISOME	0.156003	2.75019e-06	0.000124446	76	0.086	0.430365		0.000226879	0.976462	0.982684	1423	0.996	0.997
KEGG_PHENYLALANINE_METABOLISM	0.0908513	0.194918	0.383479	17	0.281	0.626754		-0.00329698	0.841809	0.889989	306	0.909	0.97008
KEGG_PHOSPHATIDYLINOSITOL_SIGNALING_SYSTEM	-0.0189766	0.576112	0.769161	73	0.688	0.895516		-0.0171145	0.00454929	0.0127875	2327	0.317	0.747535
KEGG_PORPHYRIN_AND_CHLOROPHYLL_METABOLISM	0.11427	0.0232593	0.0969392	33	0.274	0.621582		0.00764558	0.607064	0.703919	378	0.846	0.954351
KEGG_PPAR_SIGNALING_PATHWAY	0.0954224	0.00626002	0.0417445	69	0.273	0.621582		0.00725159	0.421752	0.530681	1030	0.795	0.937099
KEGG_PRIMARY_BILE_ACID_BIOSYNTHESIS	0.00730499	0.91946	0.967554	16	0.964	0.989495		0.0256248	0.134365	0.221719	285	0.314	0.744421
KEGG_PRIMARY_IMMUNODEFICIENCY	-0.143604	0.00332007	0.0248227	35	0.096	0.436743		-0.00936282	0.438813	0.543915	572	0.797	0.937099
KEGG_PRION_DISEASES	-0.0735492	0.144147	0.321088	33	0.213	0.563796		0.00437697	0.667332	0.756006	808	0.809	0.941356
KEGG_PROGESTERONE_MEDIATED_OOCYTE_MATURATION	-0.103106	0.00129249	0.0133137	82	0.01	0.188594		-0.0363849	3.15412e-07	4.11273e-06	1665	0.032	0.370087
KEGG_PROPANOATE_METABOLISM	0.153284	0.00317192	0.0242098	31	0.206	0.560005		0.0227281	0.0540769	0.104538	601	0.44	0.809007
KEGG_PROSTATE_CANCER	-0.12625	6.05744e-05	0.00123787	85	0.007	0.16898		-0.0325368	2.25486e-09	5.88031e-08	2869	0.063	0.4655
KEGG_PROTEASOME	-0.0686382	0.172882	0.357123	33	0.237	0.593483		-0.0353939	6.34018e-05	0.000351352	1072	0.047	0.409874
KEGG_PROTEIN_EXPORT	-0.169725	0.008641	0.0513997	20	0.021	0.25096		0.0143396	0.26231	0.374326	511	0.528	0.851833
KEGG_PROXIMAL_TUBULE_BICARBONATE_RECLAMATION	-0.057217	0.376023	0.576401	20	0.424	0.729014		0.0128977	0.256806	0.368052	647	0.744	0.924527
KEGG_PURINE_METABOLISM	0.029886	0.21363	0.408865	147	0.334	0.675273		-0.0073409	0.120503	0.203646	3827	0.438	0.809007
KEGG_PYRIMIDINE_METABOLISM	-0.0430653	0.166398	0.349628	87	0.299	0.65025		-0.0057063	0.40007	0.5109	1835	0.711	0.914613
KEGG_PYRUVATE_METABOLISM	0.148234	0.0015899	0.0151459	38	0.059	0.367614		0.00818237	0.447713	0.551664	721	0.637	0.885277
KEGG_REGULATION_OF_ACTIN_CYTOSKELETON	-0.0117567	0.574278	0.768208	195	0.721	0.902746		-0.00160666	0.677042	0.76227	5830	0.931	0.981943
KEGG_REGULATION_OF_AUTOPHAGY	0.0958193	0.0695934	0.199943	30	0.556	0.811478		-0.0182783	0.159194	0.252658	496	0.513	0.844418
KEGG_RENAL_CELL_CARCINOMA	-0.0502526	0.165435	0.348851	64	0.362	0.696568		-0.0194597	0.00559525	0.0151871	1709	0.345	0.771176
KEGG_RENIN_ANGIOTENSIN_SYSTEM	-0.0185276	0.791525	0.897792	17	0.788	0.933806		-0.043922	0.00689686	0.0183457	316	0.161	0.622471
KEGG_RETINOL_METABOLISM	0.159604	6.03174e-05	0.00123787	53	0.32	0.663643		-0.0141894	0.249038	0.359632	552	0.523	0.851395
KEGG_RIBOFLAVIN_METABOLISM	-0.0326124	0.651691	0.822403	16	0.698	0.897875		-0.0369041	0.0245455	0.0534296	310	0.302	0.736991
KEGG_RIBOSOME	-0.0381573	0.387368	0.589189	43	0.564	0.814654		-0.0151303	0.070684	0.131299	1199	0.569	0.867856
KEGG_RIG_I_LIKE_RECEPTOR_SIGNALING_PATHWAY	-0.0836113	0.0151146	0.0728146	71	0.11	0.436743		-0.0418945	6.78008e-06	5.56636e-05	968	0.008	0.272821
KEGG_RNA_DEGRADATION	0.0608674	0.153901	0.334463	46	0.323	0.666429		-0.00711199	0.429856	0.536816	1034	0.696	0.914613
KEGG_RNA_POLYMERASE	-0.00666984	0.9119	0.967554	23	0.93	0.985522		-0.00282381	0.849553	0.895605	377	0.928	0.981667
KEGG_SELENOAMINO_ACID_METABOLISM	0.0912857	0.114436	0.274602	25	0.129	0.46066		-0.00914505	0.480337	0.581299	498	0.711	0.914613
KEGG_SMALL_CELL_LUNG_CANCER	-0.0937259	0.00325574	0.0247008	83	0.044	0.314249		-0.00729162	0.17377	0.270943	2959	0.577	0.870079
KEGG_SNARE_INTERACTIONS_IN_VESICULAR_TRANSPORT	0.0985625	0.0409653	0.140241	36	0.084	0.427479		-0.0069079	0.452106	0.554942	994	0.785	0.937099
KEGG_SPHINGOLIPID_METABOLISM	-0.0556689	0.229629	0.427225	39	0.54	0.807658		-0.0282527	0.0219642	0.048932	550	0.26	0.708429
KEGG_SPLICEOSOME	-0.0621236	0.0471539	0.151635	86	0.363	0.696568		-0.0175392	0.00341199	0.010062	2360	0.409	0.808624
KEGG_STARCH_AND_SUCROSE_METABOLISM	0.119794	0.00731424	0.0463357	42	0.302	0.65025		-0.0292824	0.00733553	0.0194736	702	0.113	0.572151
KEGG_STEROID_BIOSYNTHESIS	0.076718	0.288274	0.489698	16	0.471	0.757996		-0.0422817	0.0666153	0.124261	157	0.27	0.716766
KEGG_STEROID_HORMONE_BIOSYNTHESIS	0.00826034	0.849875	0.928858	44	0.955	0.989495		0.0209811	0.0888806	0.15846	550	0.246	0.705129
KEGG_SULFUR_METABOLISM	0.0597792	0.455671	0.657557	13	0.611	0.853561		0.0323348	0.0625354	0.117975	277	0.456	0.814428
KEGG_SYSTEMIC_LUPUS_ERYTHEMATOSUS	-0.00754321	0.8053	0.903357	90	0.891	0.973246		-0.0079608	0.362832	0.474967	1097	0.77	0.930154
KEGG_T_CELL_RECEPTOR_SIGNALING_PATHWAY	-0.0683376	0.0175238	0.0801542	102	0.166	0.512898		-0.0318038	6.15044e-08	9.85553e-07	2456	0.034	0.372803
KEGG_TASTE_TRANSDUCTION	0.0286234	0.493424	0.696179	48	0.662	0.881681		0.00911131	0.442668	0.547672	594	0.79	0.937099
KEGG_TAURINE_AND_HYPOTAURINE_METABOLISM	0.041467	0.649873	0.820926	10	0.525	0.799638		-0.053034	0.00567811	0.0153806	227	0.079	0.495613
KEGG_TERPENOID_BACKBONE_BIOSYNTHESIS	0.130535	0.0801923	0.218502	15	0.326	0.669187		-0.0440929	0.00478111	0.013359	342	0.187	0.647682
KEGG_TGF_BETA_SIGNALING_PATHWAY	-0.0515172	0.116791	0.278147	78	0.332	0.673486		-0.0216715	0.000114611	0.000581804	2689	0.16	0.622471
KEGG_THYROID_CANCER	-0.0460913	0.407556	0.611093	27	0.419	0.725236		-0.00175016	0.849815	0.895605	982	0.948	0.989213
KEGG_TIGHT_JUNCTION	0.0553751	0.0355041	0.128893	122	0.127	0.457579		0.00409189	0.356548	0.468586	4359	0.694	0.914613
KEGG_TOLL_LIKE_RECEPTOR_SIGNALING_PATHWAY	-0.124843	1.72706e-05	0.000475693	100	0.01	0.188594		-0.0237499	0.00242832	0.00761715	1371	0.098	0.547647
KEGG_TRYPTOPHAN_METABOLISM	0.0659353	0.149615	0.32853	40	0.548	0.809555		0.00997006	0.384409	0.495588	637	0.702	0.914613
KEGG_TYPE_I_DIABETES_MELLITUS	-0.00459482	0.919033	0.967554	41	0.965	0.989495		0.0113281	0.438384	0.543891	391	0.703	0.914613
KEGG_TYPE_II_DIABETES_MELLITUS	-0.0178039	0.683303	0.839713	44	0.782	0.930198		-0.0196041	0.0155988	0.0363334	1279	0.478	0.825636
KEGG_TYROSINE_METABOLISM	0.00226702	0.96	0.981695	41	0.978	0.991971		0.000490008	0.965848	0.977609	639	0.985	0.995479
KEGG_UBIQUITIN_MEDIATED_PROTEOLYSIS	-0.128582	2.58472e-06	0.00012129	113	0.006	0.157435		-0.031543	9.24885e-09	1.9196e-07	2817	0.004	0.221667
KEGG_VALINE_LEUCINE_AND_ISOLEUCINE_BIOSYNTHESIS	0.0953891	0.273463	0.474627	11	0.37	0.70006		-0.00122126	0.95439	0.971633	183	0.976	0.994697
KEGG_VALINE_LEUCINE_AND_ISOLEUCINE_DEGRADATION	0.196296	6.86111e-06	0.000248372	44	0.125	0.454443		-0.0192242	0.0953279	0.167621	630	0.382	0.796332
KEGG_VASCULAR_SMOOTH_MUSCLE_CONTRACTION	0.0714724	0.0121271	0.0642888	104	0.077	0.409423		-0.0138083	0.00753239	0.0197986	3190	0.483	0.826391
KEGG_VASOPRESSIN_REGULATED_WATER_REABSORPTION	0.0149675	0.753034	0.877949	37	0.8	0.937476		-0.0498756	1.75329e-11	1.29071e-09	1531	0.018	0.321538
KEGG_VEGF_SIGNALING_PATHWAY	-0.00888447	0.799079	0.900741	69	0.821	0.947136		-0.0355516	1.32867e-06	1.49757e-05	1558	0.122	0.582171
KEGG_VIBRIO_CHOLERAE_INFECTION	0.0405465	0.327012	0.529152	49	0.579	0.82218		-0.00769283	0.41589	0.525491	938	0.84	0.954056
KEGG_VIRAL_MYOCARDITIS	0.0770802	0.0295275	0.112685	67	0.376	0.70006		-0.008107	0.272016	0.382432	1546	0.598	0.87128
KEGG_WNT_SIGNALING_PATHWAY	-0.0292982	0.240597	0.440908	136	0.514	0.794364		-0.0216657	5.35415e-07	6.35806e-06	4605	0.162	0.622717
NABA_BASEMENT_MEMBRANES	0.0454809	0.320271	0.524946	40	0.548	0.809555		0.0177847	0.0226818	0.0501943	1381	0.342	0.770949
NABA_COLLAGENS	0.152247	0.00048556	0.00621418	44	0.061	0.371854		-0.00622923	0.423955	0.530942	1386	0.756	0.924527
NABA_CORE_MATRISOME	0.0560712	0.00163961	0.0153881	272	0.186	0.538374		-0.0046184	0.165628	0.261001	7935	0.71	0.914613
NABA_ECM_AFFILIATED	0.0725275	0.00165448	0.0154134	160	0.093	0.435081		0.0341534	1.35644e-14	2.00451e-12	4365	0.002	0.16625
NABA_ECM_GLYCOPROTEINS	0.0357227	0.0886353	0.231548	194	0.455	0.749229		-0.00437525	0.252944	0.364241	5927	0.719	0.914613
NABA_ECM_REGULATORS	-0.00187225	0.923262	0.967554	227	0.954	0.989495		-0.0046995	0.315177	0.428278	3910	0.707	0.914613
NABA_MATRISOME	-0.00433188	0.6582	0.824103	991	0.88	0.966479		0.00528077	0.0109653	0.0270573	22873	0.582	0.871225
NABA_MATRISOME_ASSOCIATED	-0.0282519	0.0122657	0.0647525	719	0.331	0.673486		0.010251	3.23381e-05	0.000202876	15277	0.352	0.772541
NABA_PROTEOGLYCANS	0.0387299	0.435033	0.637948	34	0.475	0.760378		-0.00297913	0.788623	0.846428	678	0.906	0.97008
NABA_SECRETED_FACTORS	-0.0925557	1.06407e-08	8.42608e-07	332	0	0		0.000758848	0.827159	0.87729	7255	0.975	0.994697
PID_A6B1_A6B4_INTEGRIN_PATHWAY	0.0178416	0.689544	0.844925	42	0.708	0.901125		-0.0321724	5.92333e-05	0.000331009	1310	0.098	0.547647
PID_AJDISS_2PATHWAY	-0.0300548	0.486167	0.688239	45	0.547	0.809555		-0.0203477	0.0020144	0.00655048	1945	0.107	0.570748
PID_ALK1_PATHWAY	-0.129394	0.0318363	0.119693	23	0.177	0.524912		-0.0350166	0.000662726	0.0024899	792	0.14	0.591577
PID_ALK2_PATHWAY	-0.0301973	0.74097	0.874123	10	NA	NA		-0.0502915	0.00214726	0.00688158	311	0.073	0.478276
PID_ALPHA_SYNUCLEIN_PATHWAY	-0.0254982	0.623558	0.806171	31	0.622	0.861945		-0.0288107	0.00214454	0.00688158	952	0.348	0.7714
PID_AMB2_NEUTROPHILS_PATHWAY	-0.0378152	0.420498	0.623827	38	0.529	0.799638		0.00957525	0.284171	0.39493	1050	0.812	0.941552
PID_ANGIOPOIETIN_RECEPTOR_PATHWAY	-0.0119591	0.772511	0.888177	49	0.793	0.933806		-0.0270746	0.000281444	0.00121407	1515	0.09	0.526217
PID_ANTHRAX_PATHWAY	-0.197173	0.00634833	0.0419197	16	0.004	0.130486		-0.0125274	0.428248	0.53531	334	0.561	0.867593
PID_AP1_PATHWAY	-0.0759729	0.0319443	0.119744	67	0.122	0.450318		-0.0189159	0.00329911	0.00979714	2039	0.365	0.781348
PID_AR_NONGENOMIC_PATHWAY	-0.0459577	0.408916	0.612408	27	0.438	0.739393		-0.0377659	0.000156281	0.000755831	840	0.259	0.708429
PID_AR_PATHWAY	-0.0781202	0.0367757	0.132005	60	0.1	0.436743		-0.0355112	1.91834e-07	2.6303e-06	1814	0.134	0.58625
PID_AR_TF_PATHWAY	-0.0569682	0.160091	0.343789	51	0.261	0.616491		-0.0115537	0.15653	0.249323	1264	0.616	0.877173
PID_ARF_3PATHWAY	0.0313884	0.654286	0.823518	17	0.63	0.8637		-0.0193366	0.166926	0.262735	427	0.628	0.878275
PID_ARF6_PATHWAY	-0.0300032	0.551311	0.745477	33	0.578	0.82218		-0.0189993	0.0358352	0.0745865	1024	0.169	0.631376
PID_ARF6_TRAFFICKING_PATHWAY	0.0196681	0.648576	0.820871	45	0.696	0.897875		0.00712465	0.322016	0.434362	1628	0.633	0.882484
PID_ATF2_PATHWAY	-0.0805712	0.0391397	0.136236	55	0.097	0.436743		-0.0285007	3.07651e-05	0.00019767	1804	0.065	0.467297
PID_ATM_PATHWAY	-0.208218	4.66374e-05	0.00103666	32	0.008	0.172429		-0.0131639	0.254902	0.366112	626	0.586	0.87128
PID_ATR_PATHWAY	-0.198688	3.78575e-05	0.000888249	36	0.002	0.0754375		0.00924057	0.343768	0.457211	880	0.638	0.885741
PID_AURORA_A_PATHWAY	-0.22035	4.07961e-05	0.000939793	29	0.007	0.16898		-0.0334578	0.00478098	0.013359	595	0.28	0.721054
PID_AURORA_B_PATHWAY	-0.210698	7.17606e-06	0.000252557	38	0.014	0.213899		-0.0266257	0.00559292	0.0151871	908	0.251	0.705772
PID_AVB3_INTEGRIN_PATHWAY	0.0446508	0.188353	0.376408	73	0.454	0.749229		-0.0316176	2.71711e-07	3.57797e-06	2238	0.026	0.3458
PID_AVB3_OPN_PATHWAY	-0.0442153	0.418503	0.622351	28	0.524	0.799638		-0.0355398	0.000315833	0.0013251	861	0.146	0.601176
PID_BARD1_PATHWAY	-0.181855	0.00108426	0.0116664	27	0.026	0.255138		-0.00305566	0.798663	0.853876	583	0.858	0.957332
PID_BCR_5PATHWAY	-0.0973385	0.00721757	0.0459531	64	0.055	0.360788		-0.0321871	1.736e-05	0.00012152	1500	0.05	0.415625
PID_BETA_CATENIN_DEG_PATHWAY	-0.00223602	0.974551	0.988245	17	0.978	0.991971		-0.00993791	0.473404	0.574478	435	0.799	0.937099
PID_BETA_CATENIN_NUC_PATHWAY	-0.0651987	0.0547524	0.168545	73	0.077	0.409423		-0.030458	9.38305e-09	1.9196e-07	3023	0.025	0.342784
PID_BMP_PATHWAY	-0.0589851	0.191912	0.381481	41	0.304	0.65025		-0.0143089	0.0613271	0.116522	1439	0.348	0.7714
PID_CASPASE_PATHWAY	-0.0472109	0.249006	0.447137	50	0.31	0.655289		-0.0230308	0.00739232	0.0195463	1136	0.211	0.655764
PID_CD40_PATHWAY	-0.189815	0.000258433	0.00394499	31	0.001	0.04828		-0.0457157	5.68484e-05	0.000320846	649	0.044	0.409231
PID_CD8_TCR_DOWNSTREAM_PATHWAY	-0.0973122	0.00819476	0.0496783	62	0.108	0.436743		-0.0377171	1.03525e-05	7.735e-05	1148	0.076	0.493073
PID_CD8_TCR_PATHWAY	-0.0528624	0.192396	0.381481	51	0.482	0.769542		-0.0254038	0.00132597	0.00455058	1343	0.4	0.807214
PID_CDC42_PATHWAY	-0.00449311	0.900546	0.962051	65	0.906	0.980958		-0.0117692	0.0768407	0.140382	1908	0.41	0.808624
PID_CDC42_REG_PATHWAY	-0.0658931	0.227946	0.426599	28	0.206	0.560005		-0.016852	0.103714	0.179401	781	0.561	0.867593
PID_CERAMIDE_PATHWAY	-0.0812397	0.0544062	0.168226	47	0.177	0.524912		-0.0505853	9.82773e-08	1.48533e-06	931	0.006	0.266
PID_CIRCADIAN_PATHWAY	-0.0348692	0.640246	0.812991	15	0.699	0.897875		-0.0148813	0.316205	0.428278	379	0.677	0.904935
PID_CMYB_PATHWAY	-0.0567039	0.0804531	0.218743	80	0.088	0.431772		-0.00190942	0.718937	0.794835	3022	0.93	0.981667
PID_CONE_PATHWAY	0.0875619	0.146356	0.323619	23	0.42	0.725236		-0.00760288	0.588578	0.686072	423	0.754	0.924527
PID_CXCR3_PATHWAY	-0.139945	0.00222643	0.0188059	40	0.025	0.255138		-0.0232716	0.014573	0.0344264	924	0.401	0.807214
PID_CXCR4_PATHWAY	-0.0299726	0.311935	0.513307	96	0.438	0.739393		-0.0178685	0.00146157	0.00492125	2692	0.444	0.81227
PID_DELTA_NP63_PATHWAY	-0.00947106	0.824415	0.911115	46	0.848	0.953013		0.00989091	0.20651	0.307912	1372	0.682	0.907968
PID_DNA_PK_PATHWAY	-0.125902	0.0915105	0.23423	15	0.239	0.593687		-0.0251348	0.0875608	0.15716	386	0.388	0.800062
PID_E2F_PATHWAY	-0.138668	4.95974e-05	0.00108345	72	0.041	0.303601		-0.0184953	0.00602393	0.0162842	1861	0.448	0.813583
PID_ECADHERIN_KERATINOCYTE_PATHWAY	0.0340882	0.607194	0.791476	19	0.559	0.813888		0.014029	0.19424	0.293567	717	0.472	0.820196
PID_ECADHERIN_NASCENT_AJ_PATHWAY	0.004951	0.922869	0.967554	32	0.937	0.986015		-0.0250932	0.00513077	0.0142165	1044	0.281	0.721054
PID_ECADHERIN_STABILIZATION_PATHWAY	0.0123159	0.790415	0.897362	39	0.811	0.941483		0.00618816	0.365382	0.475996	1805	0.594	0.87128
PID_ENDOTHELIN_PATHWAY	0.0117678	0.75309	0.877949	60	0.774	0.926441		-0.01677	0.018042	0.0413721	1676	0.394	0.804518
PID_EPHA_FWDPATHWAY	0.0207961	0.679633	0.836827	33	0.757	0.920941		-0.0144737	0.0283679	0.0604637	1937	0.424	0.809007
PID_EPHA2_FWD_PATHWAY	-0.0300106	0.659543	0.824103	18	0.69	0.895516		-0.0116178	0.31654	0.428278	622	0.757	0.924527
PID_EPHB_FWD_PATHWAY	-0.0476885	0.322707	0.527	36	0.454	0.749229		-0.0133712	0.0499199	0.0974941	1814	0.616	0.877173
PID_EPHRINB_REV_PATHWAY	-0.0180561	0.732403	0.865128	30	0.76	0.920941		0.007164	0.390725	0.503047	1206	0.789	0.937099
PID_EPO_PATHWAY	-0.0344313	0.494146	0.696422	33	0.508	0.793216		-0.075201	6.51055e-14	7.90391e-12	833	0	0.147778
PID_ER_NONGENOMIC_PATHWAY	-0.0434134	0.355064	0.556076	38	0.417	0.725236		-0.0441009	7.34106e-08	1.1353e-06	1252	0.04	0.382734
PID_ERA_GENOMIC_PATHWAY	-0.0179614	0.631136	0.811003	60	0.635	0.864087		0.0317983	2.07113e-05	0.000139121	1509	0.01	0.295556
PID_ERB_GENOMIC_PATHWAY	-0.0189737	0.820034	0.910925	12	0.83	0.947136		0.00417338	0.807696	0.861456	284	0.911	0.97008
PID_ERBB_NETWORK_PATHWAY	-0.115611	0.121251	0.286613	15	0.212	0.563621		0.0166686	0.052748	0.102267	1134	0.44	0.809007
PID_ERBB1_DOWNSTREAM_PATHWAY	-0.0461677	0.133528	0.304281	89	0.22	0.568608		-0.0313718	1.55291e-09	4.21503e-08	3155	0.011	0.304792
PID_ERBB1_INTERNALIZATION_PATHWAY	-0.0480524	0.325813	0.528732	35	0.356	0.694121		-0.0380951	2.01728e-05	0.000136887	1051	0.089	0.526089
PID_ERBB1_RECEPTOR_PROXIMAL_PATHWAY	-0.0157833	0.753961	0.878004	33	0.748	0.916585		-0.0351494	0.000662682	0.0024899	786	0.093	0.530858
PID_ERBB2_ERBB3_PATHWAY	-0.0563063	0.212882	0.408051	41	0.314	0.657983		-0.0438425	2.36177e-08	4.30295e-07	1364	0.122	0.582171
PID_ERBB4_PATHWAY	-0.0764986	0.107808	0.261671	37	0.189	0.54315		0.00947587	0.115424	0.197037	2337	0.676	0.904507
PID_FAK_PATHWAY	-0.00425235	0.914093	0.967554	54	0.921	0.983956		-0.00662648	0.355408	0.468013	1639	0.749	0.924527
PID_FANCONI_PATHWAY	-0.224039	2.08782e-07	1.2024e-05	45	0	0		0.0091759	0.345797	0.458535	885	0.624	0.878249
PID_FAS_PATHWAY	-0.152869	0.00112803	0.0118395	38	0.033	0.274697		-0.0427194	0.000577342	0.00222963	543	0.073	0.478276
PID_FCER1_PATHWAY	-0.0640231	0.0870046	0.229109	60	0.072	0.400505		-0.0436783	1.69592e-08	3.22224e-07	1403	0.021	0.321538
PID_FGF_PATHWAY	-0.0311173	0.429872	0.633311	54	0.524	0.799638		-0.0244099	0.000103439	0.000533232	2139	0.26	0.708429
PID_FOXM1_PATHWAY	-0.169474	0.000254999	0.00394004	39	0.017	0.23317		-0.0224026	0.0131114	0.0314768	1029	0.316	0.746501
PID_FOXO_PATHWAY	-0.100418	0.0229158	0.095823	43	0.133	0.467451		-0.020079	0.0355518	0.0741127	919	0.224	0.672506
PID_FRA_PATHWAY	-0.0451348	0.342719	0.546195	37	0.551	0.809555		-0.0210469	0.0491043	0.0960423	732	0.371	0.785717
PID_GLYPICAN_1PATHWAY	-0.100246	0.0771061	0.213981	26	0.101	0.436743		-0.00937255	0.280551	0.390985	1113	0.797	0.937099
PID_GMCSF_PATHWAY	-0.0345332	0.49287	0.696172	33	0.514	0.794364		-0.0722753	2.49149e-11	1.53281e-09	714	0.016	0.317612
PID_HDAC_CLASSI_PATHWAY	-0.0348509	0.347588	0.551872	61	0.441	0.741994		-0.0338379	1.85423e-06	1.95724e-05	1674	0.162	0.622717
PID_HDAC_CLASSII_PATHWAY	-0.0566726	0.291313	0.492781	29	0.36	0.694121		-0.0502995	1.65091e-11	1.29071e-09	1509	0.093	0.530858
PID_HDAC_CLASSIII_PATHWAY	-0.0572519	0.322158	0.527	25	0.462	0.753362		-0.0254301	0.0108528	0.0268794	841	0.381	0.795495
PID_HEDGEHOG_2PATHWAY	-0.119487	0.0525422	0.165189	22	0.119	0.448421		0.0079831	0.391856	0.503059	965	0.763	0.925059
PID_HEDGEHOG_GLI_PATHWAY	-0.0792579	0.0693516	0.199701	44	0.167	0.512898		0.00153723	0.844077	0.891154	1377	0.947	0.989213
PID_HES_HEY_PATHWAY	-0.105342	0.0126215	0.0663546	47	0.033	0.274697		-0.0167945	0.0214407	0.0480879	1580	0.462	0.814428
PID_HIF1_TFPATHWAY	-0.0608662	0.0981857	0.247319	62	0.273	0.621582		-0.0180944	0.00633244	0.0169801	1922	0.472	0.820196
PID_HIF1A_PATHWAY	-0.12712	0.0884192	0.231461	15	0.149	0.492721		-0.0287569	0.116276	0.198011	249	0.516	0.846215
PID_HIF2PATHWAY	-0.114923	0.0224831	0.0950159	33	0.039	0.296057		-0.016255	0.0888126	0.15846	919	0.486	0.826391
PID_HIV_NEF_PATHWAY	-0.146018	0.00282848	0.022398	35	0.075	0.404129		-0.0662103	2.69805e-08	4.78454e-07	590	0.013	0.310333
PID_HNF3A_PATHWAY	-0.0720576	0.106664	0.259392	42	0.075	0.404129		-0.00594646	0.408062	0.517371	1631	0.838	0.953413
PID_HNF3B_PATHWAY	0.0762466	0.0841211	0.224855	43	0.222	0.570115		-0.0338502	0.000326704	0.00136212	945	0.314	0.744421
PID_IFNG_PATHWAY	-0.110207	0.0188902	0.0836848	38	0.024	0.255138		-0.0271973	0.00418199	0.0119526	930	0.388	0.800062
PID_IGF1_PATHWAY	0.00067026	0.990391	0.992741	27	0.993	0.997131		-0.0610923	7.63901e-10	2.36276e-08	850	0.002	0.16625
PID_IL1_PATHWAY	-0.147919	0.00440924	0.0310361	31	0.059	0.367614		-0.0525493	4.71028e-06	4.06797e-05	635	0.022	0.321538
PID_IL12_2PATHWAY	-0.171697	3.08689e-06	0.000130369	62	0	0		-0.0270195	0.00233844	0.00735254	1065	0.207	0.655764
PID_IL12_STAT4_PATHWAY	-0.143408	0.0050402	0.0350875	32	0.021	0.25096		-0.0552838	4.91481e-07	6.0525e-06	693	0.034	0.372803
PID_IL2_1PATHWAY	-0.0170402	0.671374	0.833135	52	0.664	0.881681		-0.0617002	7.69973e-17	2.04813e-14	1537	0	0.147778
PID_IL2_PI3K_PATHWAY	-0.0973191	0.0498228	0.158209	34	0.176	0.524912		-0.0527697	4.72872e-08	7.86149e-07	898	0.006	0.266
PID_IL2_STAT5_PATHWAY	-0.155018	0.0033289	0.0248227	30	0.068	0.390838		-0.0795019	3.86933e-17	1.28655e-14	940	0.001	0.147778
PID_IL23_PATHWAY	-0.206525	1.41525e-05	0.000417462	37	0.006	0.157435		-0.0704385	5.392e-09	1.23644e-07	574	0.014	0.310333
PID_IL27_PATHWAY	-0.237767	2.75569e-05	0.000684601	26	0.025	0.255138		-0.0362207	0.0119954	0.0291129	402	0.328	0.76
PID_IL3_PATHWAY	-0.0907887	0.132054	0.303599	23	0.206	0.560005		-0.0694826	9.7385e-10	2.8157e-08	648	0.024	0.339574
PID_IL4_2PATHWAY	-0.0892946	0.0144676	0.0709292	63	0.174	0.524912		-0.0337158	2.11972e-06	2.15209e-05	1667	0.133	0.585728
PID_IL5_PATHWAY	-0.0512808	0.506654	0.706972	14	0.556	0.811478		-0.0738944	5.48098e-06	4.55607e-05	316	0.079	0.495613
PID_IL6_7_PATHWAY	-0.085287	0.0457226	0.149515	46	0.103	0.436743		-0.0115678	0.156024	0.248816	1264	0.656	0.892106
PID_IL8_CXCR1_PATHWAY	-0.0648309	0.244047	0.443327	27	0.332	0.673486		-0.0274793	0.00376896	0.0109448	932	0.501	0.833955
PID_IL8_CXCR2_PATHWAY	-0.055145	0.288469	0.489698	31	0.357	0.694121		-0.0214064	0.0153217	0.0358135	1077	0.585	0.87128
PID_ILK_PATHWAY	-0.0498215	0.259051	0.457128	43	0.269	0.620743		-0.0109708	0.205949	0.307767	1116	0.698	0.914613
PID_INSULIN_GLUCOSE_PATHWAY	0.00449499	0.943192	0.975574	21	0.965	0.989495		-0.0562455	5.29827e-06	4.43188e-05	548	0.019	0.321538
PID_INSULIN_PATHWAY	-0.0143182	0.742845	0.874679	44	0.776	0.926441		-0.0140008	0.0614716	0.116629	1502	0.461	0.814428
PID_INTEGRIN_A4B1_PATHWAY	-0.0546753	0.292595	0.49429	31	0.412	0.725236		-0.00956323	0.365814	0.475996	749	0.729	0.918543
PID_INTEGRIN_A9B1_PATHWAY	-0.0850634	0.1413	0.317517	25	0.376	0.70006		-0.0122915	0.302399	0.416778	589	0.715	0.914613
PID_INTEGRIN_CS_PATHWAY	-0.00568481	0.920149	0.967554	26	0.947	0.989495		-0.0105872	0.332	0.446021	703	0.61	0.872366
PID_INTEGRIN1_PATHWAY	0.0498423	0.162459	0.346872	66	0.453	0.749229		-0.00885677	0.183598	0.282295	1903	0.583	0.871225
PID_INTEGRIN2_PATHWAY	-0.00794287	0.882424	0.951516	29	0.944	0.989258		0.0260114	0.0617732	0.116902	431	0.432	0.809007
PID_INTEGRIN3_PATHWAY	-0.0166653	0.712357	0.859424	41	0.857	0.958042		-0.00592874	0.448772	0.552143	1373	0.728	0.918543
PID_INTEGRIN4_PATHWAY	0.227397	0.0090371	0.0522831	11	0.118	0.448421		0.010758	0.502816	0.604106	324	0.743	0.924527
PID_INTEGRIN5_PATHWAY	0.0100512	0.885975	0.952912	17	0.923	0.984153		0.00364254	0.751218	0.81828	634	0.829	0.950818
PID_KIT_PATHWAY	-0.0570433	0.155534	0.337434	52	0.149	0.492721		-0.0482485	7.59464e-10	2.36276e-08	1368	0.017	0.321538
PID_LIS1_PATHWAY	0.00493907	0.931936	0.973153	25	0.965	0.989495		-0.00275813	0.72685	0.80225	1349	0.922	0.980224
PID_LKB1_PATHWAY	-0.0132058	0.767476	0.884798	42	0.82	0.94712		-0.0369853	2.30138e-05	0.000151527	1100	0.204	0.652212
PID_LPA4_PATHWAY	-0.00673662	0.930484	0.973153	14	0.945	0.989258		-0.0271681	0.0579543	0.110746	407	0.335	0.76555
PID_LYMPH_ANGIOGENESIS_PATHWAY	-0.0036349	0.951919	0.979757	23	0.952	0.989495		-0.0295052	0.0044895	0.0126505	777	0.069	0.478276
PID_LYSOPHOSPHOLIPID_PATHWAY	-0.0572725	0.11393	0.273907	64	0.263	0.618734		-0.0363695	1.35243e-07	1.97663e-06	1772	0.022	0.321538
PID_MAPK_TRK_PATHWAY	-0.0432085	0.413216	0.615211	30	0.499	0.783216		-0.0254888	0.00248846	0.00773283	1183	0.18	0.645283
PID_MET_PATHWAY	-0.0207833	0.534893	0.734246	75	0.63	0.8637		-0.0257563	9.0078e-05	0.000475412	1952	0.145	0.601176
PID_MTOR_4PATHWAY	0.0484283	0.203037	0.396376	58	0.369	0.70006		-0.0319606	8.89136e-06	6.8753e-05	1628	0.126	0.583902
PID_MYC_ACTIV_PATHWAY	-0.112619	0.00098317	0.0109416	72	0.024	0.255138		-0.0282787	4.1313e-05	0.000249756	1773	0.133	0.585728
PID_MYC_PATHWAY	-0.0785517	0.183189	0.369587	24	0.267	0.620743		-0.0323825	0.00313134	0.00940109	697	0.123	0.582171
PID_MYC_REPRESS_PATHWAY	-0.0655065	0.0824716	0.222322	59	0.143	0.4828		-0.0546924	9.66033e-17	2.14137e-14	1949	0.003	0.19
PID_NCADHERIN_PATHWAY	0.0388594	0.454457	0.656779	31	0.442	0.741994		-0.0133566	0.135376	0.22311	1049	0.473	0.820196
PID_NECTIN_PATHWAY	0.0402124	0.461864	0.665597	28	0.49	0.773111		0.0321044	0.000824237	0.00302827	910	0.141	0.591577
PID_NEPHRIN_NEPH1_PATHWAY	-0.0453564	0.382627	0.582724	31	0.529	0.799638		-0.015144	0.188519	0.287205	631	0.38	0.795495
PID_NETRIN_PATHWAY	-0.00720071	0.893341	0.957583	29	0.92	0.983956		0.00114195	0.877391	0.91832	1537	0.951	0.989213
PID_NFAT_3PATHWAY	-0.0521539	0.221797	0.419428	46	0.242	0.593687		-0.053219	9.41291e-13	9.58961e-11	1515	0.008	0.272821
PID_NFAT_TFPATHWAY	-0.197258	3.00225e-06	0.000130369	47	0	0		-0.016577	0.0260253	0.0562823	1518	0.361	0.781348
PID_NFKAPPAB_ATYPICAL_PATHWAY	-0.131901	0.0678877	0.197406	16	0.151	0.49797		-0.0598521	0.000153787	0.00074922	334	0.065	0.467297
PID_NFKAPPAB_CANONICAL_PATHWAY	-0.167676	0.00785736	0.0483266	21	0.039	0.296057		-0.0167924	0.258052	0.36944	379	0.453	0.814428
PID_NOTCH_PATHWAY	-0.0871124	0.024435	0.100192	56	0.11	0.436743		-0.0212471	0.00268769	0.00825549	1682	0.414	0.809007
PID_P38_ALPHA_BETA_DOWNSTREAM_PATHWAY	-0.00581425	0.906712	0.966193	34	0.917	0.983956		-0.0280121	0.000279121	0.00121317	1416	0.158	0.618059
PID_P38_ALPHA_BETA_PATHWAY	-0.0623997	0.245282	0.443327	29	0.404	0.721343		-0.0442905	2.02876e-06	2.07558e-05	965	0.051	0.418704
PID_P38_GAMMA_DELTA_PATHWAY	0.107289	0.218047	0.414814	11	0.242	0.593687		-0.0142263	0.457145	0.558313	228	0.64	0.886667
PID_P38_MK2_PATHWAY	-0.0247407	0.732008	0.865128	16	0.718	0.902746		-0.0643246	2.18705e-06	2.18521e-05	453	0.031	0.368125
PID_P38_MKK3_6PATHWAY	-0.0658931	0.245254	0.443327	26	0.249	0.601086		-0.0557936	5.71887e-06	4.72428e-05	553	0.013	0.310333
PID_P53_DOWNSTREAM_PATHWAY	-0.0594486	0.0185145	0.0831838	133	0.164	0.512819		-0.0329558	2.66601e-10	1.07448e-08	3128	0.029	0.363868
PID_P53_REGULATION_PATHWAY	-0.150156	0.000160591	0.00278724	53	0.001	0.04828		-0.0150318	0.103181	0.179153	986	0.565	0.867856
PID_P73PATHWAY	-0.0725059	0.02932	0.112458	76	0.088	0.431772		-0.0182512	0.00346873	0.0101617	2169	0.401	0.807214
PID_P75_NTR_PATHWAY	-0.0363765	0.311645	0.513307	65	0.544	0.809555		-0.0111927	0.152866	0.245249	1372	0.651	0.889856
PID_PDGFRA_PATHWAY	-0.0733347	0.234106	0.432974	22	0.438	0.739393		-0.0474633	3.61131e-05	0.000223359	634	0.041	0.386738
PID_PDGFRB_PATHWAY	-0.0213182	0.433717	0.637494	114	0.494	0.778405		-0.0220776	1.47856e-05	0.00010516	3281	0.281	0.721054
PID_PI3K_PLC_TRK_PATHWAY	-0.0196694	0.709533	0.858623	30	0.761	0.920941		-0.0467969	1.21745e-07	1.81934e-06	1073	0.061	0.460966
PID_PI3KCI_AKT_PATHWAY	-0.0468758	0.366891	0.570369	31	0.469	0.756795		-0.0273487	0.00208605	0.006748	1063	0.346	0.7714
PID_PI3KCI_PATHWAY	-0.0560021	0.204566	0.397524	43	0.396	0.714127		-0.0143905	0.0993686	0.173666	1101	0.573	0.867984
PID_PLK1_PATHWAY	-0.238199	1.93573e-07	1.16789e-05	40	0.002	0.0754375		-0.0344927	0.000773717	0.00285845	796	0.124	0.582756
PID_PRL_SIGNALING_EVENTS_PATHWAY	-0.1112	0.0853494	0.226328	20	0.119	0.448421		-0.01831	0.199111	0.299906	411	0.423	0.809007
PID_PS1_PATHWAY	-0.07603	0.0814809	0.220912	44	0.19	0.543436		-0.0339279	2.17458e-05	0.00014389	1317	0.062	0.463258
PID_PTP1B_PATHWAY	-0.0513259	0.210117	0.405203	50	0.33	0.673486		-0.0195876	0.0139398	0.0330481	1325	0.355	0.774016
PID_RAC1_PATHWAY	-0.0142676	0.730171	0.865128	49	0.732	0.908945		-0.0259398	0.00127883	0.00440634	1296	0.131	0.585728
PID_RAC1_REG_PATHWAY	0.0351014	0.454613	0.656779	38	0.571	0.814654		-0.00726448	0.335258	0.449293	1481	0.72	0.914613
PID_RAS_PATHWAY	0.0122457	0.819634	0.910925	29	0.827	0.947136		-0.0455102	2.54229e-06	2.48489e-05	896	0.071	0.478276
PID_RB_1PATHWAY	-0.133476	0.00028729	0.00418387	62	0.025	0.255138		-0.0152517	0.011578	0.0283586	2320	0.341	0.770949
PID_REELIN_PATHWAY	0.0120973	0.824822	0.911115	28	0.837	0.949975		-0.00464366	0.522202	0.621898	1600	0.862	0.958608
PID_REG_GR_PATHWAY	-0.0672561	0.0419009	0.142171	77	0.112	0.440339		-0.033913	3.6743e-07	4.69886e-06	1898	0.102	0.560579
PID_RET_PATHWAY	-0.029587	0.54518	0.743534	35	0.61	0.853152		-0.0316396	8.18664e-05	0.000444418	1303	0.04	0.382734
PID_RETINOIC_ACID_PATHWAY	-0.0391884	0.473347	0.676134	28	0.609	0.852741		0.0121101	0.155217	0.247826	1157	0.599	0.87128
PID_RHOA_PATHWAY	0.0359012	0.421496	0.623873	42	0.527	0.799638		-0.00384347	0.652474	0.741701	1153	0.853	0.956883
PID_RHOA_REG_PATHWAY	-0.0166985	0.705222	0.857654	43	0.79	0.933806		-0.00364637	0.636424	0.727186	1414	0.866	0.958608
PID_RHODOPSIN_PATHWAY	0.129235	0.0285394	0.110918	24	0.279	0.626754		0.00443423	0.765503	0.827739	378	0.911	0.97008
PID_RXR_VDR_PATHWAY	0.0500177	0.377772	0.578064	26	0.496	0.779521		-0.0103177	0.227105	0.33302	1151	0.752	0.924527
PID_S1P_META_PATHWAY	-0.0725886	0.249841	0.447137	21	0.262	0.617645		-0.0180733	0.214581	0.317944	394	0.598	0.87128
PID_S1P_S1P1_PATHWAY	-0.0744644	0.26144	0.460062	19	0.266	0.619811		-0.0154846	0.226103	0.331918	511	0.702	0.914613
PID_S1P_S1P2_PATHWAY	-0.0424798	0.490678	0.69385	22	0.552	0.809555		-0.0313083	0.00950472	0.0239418	574	0.207	0.655764
PID_S1P_S1P3_PATHWAY	-0.0919592	0.098455	0.247505	27	0.163	0.512346		-0.0103596	0.31596	0.428278	785	0.763	0.925059
PID_S1P_S1P4_PATHWAY	-0.042498	0.62562	0.80719	11	NA	NA		-0.00604007	0.699131	0.780726	342	0.893	0.966488
PID_SHP2_PATHWAY	-0.123011	0.00163706	0.0153881	55	0.048	0.331063		-0.0155729	0.0132122	0.0315479	2141	0.369	0.782727
PID_SMAD2_3NUCLEAR_PATHWAY	-0.105548	0.00140891	0.013946	77	0.059	0.367614		-0.032465	5.57879e-09	1.25759e-07	2737	0.027	0.352059
PID_SMAD2_3PATHWAY	-0.168712	0.0352578	0.128367	13	0.034	0.27917		-0.0791086	3.83924e-07	4.86304e-06	344	0.012	0.310333
PID_SYNDECAN_1_PATHWAY	0.106261	0.0138079	0.0699783	45	0.189	0.54315		-0.0227349	0.00455734	0.0127875	1309	0.279	0.721054
PID_SYNDECAN_2_PATHWAY	-0.0775186	0.142109	0.318113	30	0.197	0.554263		-0.0267592	0.00749078	0.0197282	837	0.272	0.717569
PID_SYNDECAN_3_PATHWAY	-0.0816734	0.243927	0.443327	17	0.247	0.598653		-0.0112695	0.422693	0.530861	423	0.748	0.924527
PID_SYNDECAN_4_PATHWAY	0.039032	0.452455	0.655155	31	0.488	0.773111		-0.0279454	0.00345629	0.0101476	918	0.217	0.665
PID_TAP63_PATHWAY	-0.0420361	0.290714	0.492426	53	0.354	0.693633		-0.0207837	0.00969801	0.0243825	1302	0.403	0.807214
PID_TCPTP_PATHWAY	-0.118867	0.00778098	0.0480903	42	0.081	0.421409		-0.0456691	1.83202e-07	2.53811e-06	1095	0.036	0.372803
PID_TCR_CALCIUM_PATHWAY	-0.18377	0.00119285	0.012388	26	0.002	0.0754375		-0.0555305	5.59588e-07	6.5863e-06	680	0.015	0.311719
PID_TCR_JNK_PATHWAY	-0.00391159	0.959602	0.981695	14	0.969	0.989495		-0.0500818	0.000931649	0.00333692	365	0.109	0.570748
PID_TCR_PATHWAY	-0.00821018	0.822099	0.910925	63	0.899	0.977561		-0.0283947	5.49832e-05	0.000316274	1701	0.279	0.721054
PID_TCR_RAS_PATHWAY	-0.00529174	0.949408	0.979468	12	NA	NA		-0.000293232	0.985139	0.987367	337	0.997	0.997
PID_TELOMERASE_PATHWAY	-0.149104	5.0974e-05	0.00109465	62	0.001	0.04828		-0.0281536	8.53857e-05	0.000457915	1641	0.173	0.635608
PID_TGFBR_PATHWAY	-0.02608	0.532617	0.732635	48	0.667	0.881784		-0.0306957	4.27837e-05	0.000256317	1496	0.064	0.467297
PID_THROMBIN_PAR1_PATHWAY	0.0022731	0.959893	0.981695	41	0.964	0.989495		-0.0315496	0.000260457	0.0011395	1125	0.299	0.736426
PID_THROMBIN_PAR4_PATHWAY	-0.00328552	0.967296	0.984388	13	0.968	0.989495		-0.0360373	0.0518461	0.100667	243	0.168	0.629408
PID_TNF_PATHWAY	-0.0967977	0.0248998	0.101441	45	0.09	0.43452		-0.0485402	4.08345e-07	5.12358e-06	913	0.023	0.3325
PID_TOLL_ENDOGENOUS_PATHWAY	-0.171783	0.00437697	0.0309811	23	0.053	0.359388		0.00566688	0.741459	0.813225	283	0.875	0.958608
PID_TRAIL_PATHWAY	-0.198201	0.00047396	0.00621418	26	0.008	0.172429		-0.035012	0.0257125	0.0557874	339	0.168	0.629408
PID_TRKR_PATHWAY	-0.0267287	0.486098	0.688239	57	0.683	0.895516		-0.000344448	0.957691	0.973799	2004	0.991	0.996747
PID_TXA2PATHWAY	-0.0669907	0.0892285	0.232365	54	0.233	0.587121		-0.0269301	0.000255213	0.00112444	1553	0.327	0.76
PID_UPA_UPAR_PATHWAY	0.0282629	0.52686	0.727951	42	0.71	0.901125		0.00149836	0.877583	0.91832	886	0.967	0.992889
PID_VEGF_VEGFR_PATHWAY	-0.118431	0.194816	0.383479	10	0.258	0.615427		0.0062884	0.605614	0.703464	564	0.894	0.966488
PID_VEGFR1_2_PATHWAY	-0.0038794	0.914729	0.967554	64	0.917	0.983956		-0.035993	5.44491e-08	8.83138e-07	1926	0.073	0.478276
PID_VEGFR1_PATHWAY	-0.0981497	0.0896472	0.232401	25	0.123	0.451249		-0.00977255	0.277566	0.388546	1036	0.735	0.91875
PID_WNT_CANONICAL_PATHWAY	-0.0227849	0.724447	0.861853	20	0.769	0.924766		-0.0330927	0.0107309	0.0266768	497	0.269	0.716766
PID_WNT_NONCANONICAL_PATHWAY	0.0863693	0.101925	0.252972	30	0.084	0.427479		-0.00972899	0.265231	0.376878	1101	0.603	0.87128
PID_WNT_SIGNALING_PATHWAY	-0.0327133	0.549462	0.745477	28	0.643	0.869094		-0.030099	0.00157127	0.00522446	925	0.203	0.652212
REACTOME_3_UTR_MEDIATED_TRANSLATIONAL_REGULATION	-0.0140143	0.714961	0.859461	57	0.82	0.94712		-0.0228944	0.00155153	0.00517177	1610	0.329	0.760991
REACTOME_A_TETRASACCHARIDE_LINKER_SEQUENCE_IS_REQUIRED_FOR_GAG_SYNTHESIS	-0.00894554	0.877065	0.948967	25	0.93	0.985522		0.0234773	0.00232998	0.0073433	1415	0.25	0.705772
REACTOME_ABACAVIR_TRANSPORT_AND_METABOLISM	0.0370609	0.684959	0.840933	10	NA	NA		0.000873667	0.979095	0.984276	75	0.986	0.995733
REACTOME_ABC_FAMILY_PROTEINS_MEDIATED_TRANSPORT	0.157728	0.00203898	0.0180656	32	0.014	0.213899		-0.00356525	0.763681	0.82644	595	0.87	0.958608
REACTOME_ABCA_TRANSPORTERS_IN_LIPID_HOMEOSTASIS	0.143849	0.0464673	0.150189	16	0.099	0.436743		-0.0281819	0.124513	0.209358	248	0.322	0.753979
REACTOME_ABORTIVE_ELONGATION_OF_HIV1_TRANSCRIPT_IN_THE_ABSENCE_OF_TAT	-0.209683	0.0119312	0.063784	12	NA	NA		-0.0218121	0.205729	0.307767	281	0.575	0.869557
REACTOME_ACETYLCHOLINE_BINDING_AND_DOWNSTREAM_EVENTS	0.216013	0.00378871	0.0272744	15	0.07	0.398538		-0.0124497	0.606222	0.703557	143	0.756	0.924527
REACTOME_ACTIVATED_AMPK_STIMULATES_FATTY_ACID_OXIDATION_IN_MUSCLE	0.0901492	0.185717	0.372905	18	0.35	0.690278		-0.0491299	0.0048847	0.0136198	274	0.212	0.655764
REACTOME_ACTIVATED_NOTCH1_TRANSMITS_SIGNAL_TO_THE_NUCLEUS	-0.0232423	0.693712	0.847573	24	0.817	0.946371		-0.0235048	0.0445919	0.0883864	611	0.517	0.84681
REACTOME_ACTIVATED_POINT_MUTANTS_OF_FGFR2	0.00164188	0.981868	0.991257	16	0.987	0.996078		-0.00734703	0.528129	0.627153	617	0.845	0.954351
REACTOME_ACTIVATED_TAK1_MEDIATES_P38_MAPK_ACTIVATION	-0.0954951	0.173065	0.357123	17	0.386	0.706983		-0.0593439	0.000167265	0.000794511	336	0.006	0.266
REACTOME_ACTIVATED_TLR4_SIGNALLING	-0.138239	1.425e-05	0.000417462	83	0	0		-0.0350272	7.49293e-08	1.14547e-06	1992	0.019	0.321538
REACTOME_ACTIVATION_OF_ATR_IN_RESPONSE_TO_REPLICATION_STRESS	-0.177888	0.000275312	0.00405606	35	0.028	0.261984		-0.00501575	0.673094	0.7593	592	0.838	0.953413
REACTOME_ACTIVATION_OF_BH3_ONLY_PROTEINS	-0.00857672	0.914765	0.967554	13	0.93	0.985522		-0.0449435	0.00216495	0.00692161	389	0.32	0.750617
REACTOME_ACTIVATION_OF_CHAPERONE_GENES_BY_XBP1S	0.0725491	0.0927482	0.236919	45	0.118	0.448421		-0.000266153	0.976773	0.982684	1004	0.993	0.996747
REACTOME_ACTIVATION_OF_CHAPERONES_BY_ATF6_ALPHA	-0.0806401	0.354553	0.556076	11	NA	NA		-0.111677	4.22378e-09	1.02139e-07	231	0.007	0.266
REACTOME_ACTIVATION_OF_GENES_BY_ATF4	0.0340436	0.564046	0.757528	24	0.558	0.813413		-0.064125	4.88364e-05	0.000287739	335	0.015	0.311719
REACTOME_ACTIVATION_OF_IRF3_IRF7_MEDIATED_BY_TBK1_IKK_EPSILON	-0.226157	0.013296	0.0682026	10	0.035	0.281633		-0.00236684	0.90328	0.937831	220	0.928	0.981667
REACTOME_ACTIVATION_OF_KAINATE_RECEPTORS_UPON_GLUTAMATE_BINDING	0.0228064	0.717691	0.860279	21	0.763	0.920941		0.00273766	0.752721	0.818577	1112	0.896	0.966488
REACTOME_ACTIVATION_OF_NF_KAPPAB_IN_B_CELLS	-0.102449	0.0152758	0.0733124	47	0.036	0.285868		-0.0291734	5.71732e-05	0.000320846	1603	0.053	0.429817
REACTOME_ACTIVATION_OF_NMDA_RECEPTOR_UPON_GLUTAMATE_BINDING_AND_POSTSYNAPTIC_EVENTS	-0.0305402	0.550348	0.745477	32	0.684	0.895516		-0.00792102	0.343614	0.457211	1201	0.656	0.892106
REACTOME_ACTIVATION_OF_RAC	0.163703	0.0410652	0.140241	13	0.059	0.367614		-0.0544182	4.62094e-06	4.01689e-05	593	0.109	0.570748
REACTOME_ACTIVATION_OF_THE_MRNA_UPON_BINDING_OF_THE_CAP_BINDING_COMPLEX_AND_EIFS_AND_SUBSEQUENT_BINDING_TO_43S	0.026409	0.622905	0.80615	29	0.708	0.901125		-0.0240112	0.00875727	0.0225284	1000	0.244	0.702424
REACTOME_ACTIVATION_OF_THE_PRE_REPLICATIVE_COMPLEX	-0.157785	0.0028081	0.0223765	30	0.09	0.43452		-0.0115143	0.267777	0.378876	776	0.643	0.887585
REACTOME_ACYL_CHAIN_REMODELLING_OF_PC	0.0730069	0.236203	0.435618	22	0.324	0.667352		-0.00749205	0.707043	0.785604	210	0.818	0.942756
REACTOME_ACYL_CHAIN_REMODELLING_OF_PE	0.0567777	0.368073	0.571506	21	0.437	0.739393		0.00322764	0.87047	0.913753	213	0.906	0.97008
REACTOME_ACYL_CHAIN_REMODELLING_OF_PG	0.15764	0.0291084	0.11244	16	0.09	0.43452		-0.00600022	0.816314	0.868558	125	0.858	0.957332
REACTOME_ACYL_CHAIN_REMODELLING_OF_PI	0.109935	0.140623	0.317517	15	0.22	0.568608		-0.034755	0.175038	0.272543	127	0.357	0.777103
REACTOME_ACYL_CHAIN_REMODELLING_OF_PS	0.142681	0.0558292	0.170752	15	0.092	0.435081		0.000907515	0.967516	0.978552	168	0.979	0.994706
REACTOME_ADAPTIVE_IMMUNE_SYSTEM	-0.048193	0.000549493	0.00689315	454	0.055	0.360788		-0.0209259	1.00943e-12	9.58961e-11	10404	0.209	0.655764
REACTOME_ADENYLATE_CYCLASE_ACTIVATING_PATHWAY	0.0255989	0.779301	0.891664	10	0.831	0.947136		0.0131886	0.53021	0.628503	189	0.749	0.924527
REACTOME_ADENYLATE_CYCLASE_INHIBITORY_PATHWAY	0.00929782	0.90763	0.966359	13	0.922	0.983956		0.0190373	0.245331	0.355436	311	0.619	0.877687
REACTOME_ADHERENS_JUNCTIONS_INTERACTIONS	0.0553206	0.320203	0.524946	27	0.469	0.756795		0.021807	0.000204637	0.0009289	2457	0.405	0.807571
REACTOME_ADP_SIGNALLING_THROUGH_P2RY1	0.0137465	0.835768	0.918625	19	0.855	0.958042		-0.0677905	4.97498e-06	4.21448e-05	379	0.015	0.311719
REACTOME_ADP_SIGNALLING_THROUGH_P2RY12	-0.0354156	0.635016	0.811914	15	NA	NA		-0.0454871	0.003065	0.00922764	354	0.185	0.647682
REACTOME_ADVANCED_GLYCOSYLATION_ENDPRODUCT_RECEPTOR_SIGNALING	-0.108908	0.21118	0.406243	11	0.101	0.436743		-0.0183161	0.423928	0.530942	159	0.535	0.851833
REACTOME_AKT_PHOSPHORYLATES_TARGETS_IN_THE_CYTOSOL	-0.123821	0.137637	0.311403	12	0.235	0.590927		-0.0145947	0.400543	0.5109	277	0.835	0.953262
REACTOME_ALPHA_LINOLENIC_ACID_ALA_METABOLISM	0.338235	0.000103121	0.00195006	11	0.026	0.255138		-0.0406472	0.167846	0.263871	96	0.389	0.800882
REACTOME_AMINE_COMPOUND_SLC_TRANSPORTERS	0.115421	0.0380828	0.133611	27	0.172	0.520311		-0.00631045	0.569824	0.665964	679	0.833	0.951796
REACTOME_AMINE_DERIVED_HORMONES	-0.0779392	0.296195	0.498379	15	0.176	0.524912		0.0312406	0.037871	0.0780906	369	0.21	0.655764
REACTOME_AMINE_LIGAND_BINDING_RECEPTORS	0.140638	0.0031121	0.0241844	37	0.054	0.360788		0.0152463	0.170047	0.266233	678	0.485	0.826391
REACTOME_AMINO_ACID_AND_OLIGOPEPTIDE_SLC_TRANSPORTERS	-0.012379	0.764754	0.883266	49	0.88	0.966479		0.0052719	0.619276	0.714343	744	0.807	0.939851
REACTOME_AMINO_ACID_SYNTHESIS_AND_INTERCONVERSION_TRANSAMINATION	0.0393973	0.585527	0.776328	16	0.688	0.895516		0.000944706	0.960619	0.974541	228	0.983	0.995479
REACTOME_AMINO_ACID_TRANSPORT_ACROSS_THE_PLASMA_MEMBRANE	0.00102964	0.984187	0.992017	31	0.99	0.996606		0.0222126	0.080429	0.145803	518	0.489	0.826391
REACTOME_AMYLOIDS	0.0504098	0.253469	0.451046	43	0.37	0.70006		-0.000162615	0.990868	0.991613	414	0.994	0.996998
REACTOME_ANDROGEN_BIOSYNTHESIS	-0.279887	0.00218459	0.0186974	10	0.035	0.281633		-0.0468285	0.0721232	0.133228	123	0.256	0.708429
REACTOME_ANTIGEN_ACTIVATES_B_CELL_RECEPTOR_LEADING_TO_GENERATION_OF_SECOND_MESSENGERS	-0.0442874	0.434825	0.637948	26	0.525	0.799638		-0.0168572	0.0820745	0.148516	892	0.5	0.833955
REACTOME_ANTIGEN_PRESENTATION_FOLDING_ASSEMBLY_AND_PEPTIDE_LOADING_OF_CLASS_I_MHC	0.066559	0.303111	0.503332	20	0.604	0.849683		-0.0508866	0.00126978	0.00439795	335	0.305	0.737283
REACTOME_ANTIGEN_PROCESSING_CROSS_PRESENTATION	-0.00130564	0.972623	0.98743	58	0.976	0.991971		-0.0314321	4.15039e-05	0.000249775	1431	0.13	0.585728
REACTOME_ANTIGEN_PROCESSING_UBIQUITINATION_PROTEASOME_DEGRADATION	-0.0733588	0.00111757	0.0118395	168	0.087	0.430365		-0.0181466	4.8894e-05	0.000287739	4298	0.198	0.652212
REACTOME_ANTIVIRAL_MECHANISM_BY_IFN_STIMULATED_GENES	-0.05805	0.123839	0.291644	59	0.256	0.611865		-0.0513426	7.2099e-09	1.57199e-07	1066	0.011	0.304792
REACTOME_APC_C_CDC20_MEDIATED_DEGRADATION_OF_CYCLIN_B	-0.139777	0.0530193	0.166276	16	0.166	0.512898		-0.053553	0.000883314	0.00319961	322	0.04	0.382734
REACTOME_APC_C_CDC20_MEDIATED_DEGRADATION_OF_MITOTIC_PROTEINS	-0.117268	0.00350347	0.0258076	52	0.015	0.226312		-0.0356286	3.71253e-06	3.35896e-05	1419	0.027	0.352059
REACTOME_APC_C_CDH1_MEDIATED_DEGRADATION_OF_CDC20_AND_OTHER_APC_C_CDH1_TARGETED_PROTEINS_IN_LATE_MITOSIS_EARLY_G1	-0.119745	0.00314951	0.0241844	51	0.013	0.206461		-0.0353697	1.17911e-05	8.66417e-05	1290	0.037	0.372803
REACTOME_APC_CDC20_MEDIATED_DEGRADATION_OF_NEK2A	-0.162601	0.0169899	0.0788507	18	0.072	0.400505		-0.0343038	0.0147841	0.0347394	422	0.154	0.615075
REACTOME_APOPTOSIS	-0.0249841	0.333257	0.536112	127	0.394	0.712981		-0.0165643	0.00148258	0.00497936	3134	0.172	0.633684
REACTOME_APOPTOSIS_INDUCED_DNA_FRAGMENTATION	0.00622284	0.940522	0.975156	12	0.939	0.987259		0.0097362	0.668858	0.75654	161	0.794	0.937099
REACTOME_APOPTOTIC_CLEAVAGE_OF_CELL_ADHESION_PROTEINS	0.224555	0.00709207	0.0456124	12	0.041	0.303601		0.0083207	0.714714	0.792142	161	0.804	0.939509
REACTOME_APOPTOTIC_CLEAVAGE_OF_CELLULAR_PROTEINS	0.0614975	0.190179	0.37946	38	0.339	0.679689		-0.0117321	0.267239	0.378673	749	0.461	0.814428
REACTOME_APOPTOTIC_EXECUTION_PHASE	0.0391729	0.334066	0.536454	51	0.377	0.70006		-0.012024	0.206404	0.307912	926	0.429	0.809007
REACTOME_AQUAPORIN_MEDIATED_TRANSPORT	-0.0197377	0.662357	0.826637	41	0.689	0.895516		-0.013841	0.141152	0.230913	948	0.569	0.867856
REACTOME_ARMS_MEDIATED_ACTIVATION	0.0445043	0.564409	0.757528	14	0.554	0.810519		-0.031504	0.0279034	0.0598572	407	0.237	0.694295
REACTOME_ASPARAGINE_N_LINKED_GLYCOSYLATION	0.00680102	0.835971	0.918625	78	0.906	0.980958		0.00169606	0.806393	0.861448	1761	0.909	0.97008
REACTOME_ASSEMBLY_OF_THE_PRE_REPLICATIVE_COMPLEX	-0.115269	0.00447746	0.0313422	51	0.032	0.274697		-0.0281272	0.000353234	0.00145901	1357	0.126	0.583902
REACTOME_ASSOCIATION_OF_LICENSING_FACTORS_WITH_THE_PRE_REPLICATIVE_COMPLEX	-0.275238	0.00157827	0.0151459	11	0.034	0.27917		-0.0232936	0.129424	0.215721	354	0.418	0.809007
REACTOME_ASSOCIATION_OF_TRIC_CCT_WITH_TARGET_PROTEINS_DURING_BIOSYNTHESIS	0.0147992	0.794118	0.897792	26	0.839	0.949975		0.00700853	0.569822	0.665964	550	0.715	0.914613
REACTOME_AUTODEGRADATION_OF_CDH1_BY_CDH1_APC_C	-0.105661	0.0166836	0.0777136	43	0.031	0.274697		-0.0351966	2.49663e-05	0.000162771	1205	0.046	0.409874
REACTOME_AUTODEGRADATION_OF_THE_E3_UBIQUITIN_LIGASE_COP1	-0.0926988	0.0580238	0.175456	35	0.074	0.404129		-0.0328103	0.000244354	0.00108693	1049	0.122	0.582171
REACTOME_AXON_GUIDANCE	0.022184	0.255767	0.453861	225	0.59	0.835833		-0.00926361	0.00324655	0.00970317	8955	0.336	0.766518
REACTOME_BASE_EXCISION_REPAIR	-0.0635398	0.337942	0.540853	19	0.304	0.65025		-0.00939821	0.536698	0.635061	361	0.818	0.942756
REACTOME_BASE_FREE_SUGAR_PHOSPHATE_REMOVAL_VIA_THE_SINGLE_NUCLEOTIDE_REPLACEMENT_PATHWAY	-0.109929	0.228824	0.426993	10	NA	NA		0.00597539	0.774966	0.836611	191	0.869	0.958608
REACTOME_BASIGIN_INTERACTIONS	-0.0260967	0.658352	0.824103	24	0.799	0.937214		-0.00142629	0.91842	0.944701	431	0.965	0.992889
REACTOME_BETA_DEFENSINS	-0.211904	1.47062e-05	0.000417462	35	0.104	0.436743		0.0951449	0.000617173	0.00235838	108	0.02	0.321538
REACTOME_BILE_ACID_AND_BILE_SALT_METABOLISM	0.0576009	0.300662	0.502139	27	0.7	0.897875		0.0213016	0.104007	0.179648	487	0.118	0.579114
REACTOME_BILE_SALT_AND_ORGANIC_ANION_SLC_TRANSPORTERS	0.0512266	0.556457	0.75063	11	0.666	0.881784		0.0320945	0.229325	0.335536	117	0.435	0.809007
REACTOME_BIOLOGICAL_OXIDATIONS	0.118423	4.51353e-06	0.000173292	127	0.194	0.549667		0.00884722	0.248773	0.359632	1430	0.594	0.87128
REACTOME_BIOSYNTHESIS_OF_THE_N_GLYCAN_PRECURSOR_DOLICHOL_LIPID_LINKED_OLIGOSACCHARIDE_LLO_AND_TRANSFER_TO_A_NASCENT_PROTEIN	-0.0695504	0.211397	0.406243	27	0.232	0.587121		-0.0171042	0.18508	0.283263	502	0.536	0.851833
REACTOME_BMAL1_CLOCK_NPAS2_ACTIVATES_CIRCADIAN_EXPRESSION	0.000734104	0.988195	0.992741	34	0.984	0.994714		-0.00753918	0.335788	0.449293	1371	0.726	0.917852
REACTOME_BOTULINUM_NEUROTOXICITY	0.177164	0.0141961	0.0708182	16	0.027	0.260712		0.0309499	0.00667301	0.0178573	643	0.425	0.809007
REACTOME_BRANCHED_CHAIN_AMINO_ACID_CATABOLISM	0.211352	0.00256692	0.020848	17	0.118	0.448421		-0.0244896	0.127761	0.213562	323	0.362	0.781348
REACTOME_CA_DEPENDENT_EVENTS	-0.0700738	0.245064	0.443327	23	0.338	0.678812		-0.013509	0.218404	0.322394	695	0.675	0.904079
REACTOME_CALNEXIN_CALRETICULIN_CYCLE	0.0337975	0.698005	0.851176	11	0.73	0.908361		-0.0564666	0.00124246	0.00432585	273	0.264	0.712211
REACTOME_CASPASE_MEDIATED_CLEAVAGE_OF_CYTOSKELETAL_PROTEINS	0.148764	0.0744682	0.209669	12	0.137	0.472454		-0.0174035	0.43482	0.540983	168	0.57	0.867984
REACTOME_CD28_CO_STIMULATION	-0.111478	0.0347653	0.126938	30	0.213	0.563796		-0.00748717	0.445869	0.550098	869	0.718	0.914613
REACTOME_CD28_DEPENDENT_PI3K_AKT_SIGNALING	-0.0993839	0.115137	0.275763	21	0.377	0.70006		-0.00118026	0.913154	0.941469	715	0.955	0.989213
REACTOME_CD28_DEPENDENT_VAV1_PATHWAY	-0.138476	0.129547	0.299571	10	NA	NA		-0.0267899	0.141827	0.231688	251	0.328	0.76
REACTOME_CDC6_ASSOCIATION_WITH_THE_ORC_ORIGIN_COMPLEX	-0.235968	0.00674774	0.044069	11	0.114	0.446747		-0.0156472	0.338866	0.452501	312	0.619	0.877687
REACTOME_CDK_MEDIATED_PHOSPHORYLATION_AND_REMOVAL_OF_CDC6	-0.0802517	0.105774	0.258218	34	0.142	0.4828		-0.0298256	0.000605149	0.00231945	1110	0.19	0.649693
REACTOME_CDT1_ASSOCIATION_WITH_THE_CDC6_ORC_ORIGIN_COMPLEX	-0.123617	0.00564392	0.0380364	42	0.029	0.265174		-0.0311222	0.000202082	0.000923607	1198	0.108	0.570748
REACTOME_CELL_CELL_COMMUNICATION	0.0817894	0.00225109	0.0188883	118	0.021	0.25096		0.0263361	2.53547e-11	1.53281e-09	5556	0.056	0.445988
REACTOME_CELL_CELL_JUNCTION_ORGANIZATION	0.0402326	0.298685	0.501236	56	0.421	0.725924		0.0155302	0.00329882	0.00979714	3046	0.406	0.808353
REACTOME_CELL_CYCLE	-0.171489	2.23355e-27	4.71652e-25	348	0	0		-0.017882	5.13993e-07	6.21465e-06	6891	0.186	0.647682
REACTOME_CELL_CYCLE_CHECKPOINTS	-0.150767	2.77089e-07	1.5264e-05	98	0	0		-0.0201407	0.00125468	0.00435698	2170	0.192	0.651429
REACTOME_CELL_CYCLE_MITOTIC	-0.170028	4.95307e-22	8.96506e-20	278	0	0		-0.0165226	9.77068e-06	7.43689e-05	6232	0.201	0.652212
REACTOME_CELL_DEATH_SIGNALLING_VIA_NRAGE_NRIF_AND_NADE	-0.0449632	0.249687	0.447137	55	0.427	0.732087		0.00640796	0.350985	0.464475	1787	0.725	0.917852
REACTOME_CELL_EXTRACELLULAR_MATRIX_INTERACTIONS	-0.00767238	0.920858	0.967554	14	0.93	0.985522		0.0151082	0.280745	0.390985	426	0.61	0.872366
REACTOME_CELL_JUNCTION_ORGANIZATION	0.0554541	0.0934468	0.238224	77	0.181	0.532846		0.0162129	0.000897391	0.00322576	3583	0.26	0.708429
REACTOME_CELL_SURFACE_INTERACTIONS_AT_THE_VASCULAR_WALL	-0.0659575	0.0395579	0.136566	82	0.415	0.725236		-0.00329829	0.60866	0.705155	2036	0.844	0.954351
REACTOME_CGMP_EFFECTS	-0.0310211	0.639908	0.812991	19	0.76	0.920941		-0.0477695	4.27443e-06	3.79e-05	776	0.047	0.409874
REACTOME_CHEMOKINE_RECEPTORS_BIND_CHEMOKINES	-0.159306	5.31283e-05	0.00112189	54	0.014	0.213899		0.00656155	0.651887	0.741667	395	0.871	0.958608
REACTOME_CHOLESTEROL_BIOSYNTHESIS	0.112345	0.0749141	0.210411	21	0.318	0.66063		-0.019313	0.317049	0.428531	224	0.67	0.900101
REACTOME_CHONDROITIN_SULFATE_BIOSYNTHESIS	-0.00107905	0.987017	0.992741	19	0.989	0.99643		-0.00597861	0.640244	0.730923	511	0.827	0.949836
REACTOME_CHONDROITIN_SULFATE_DERMATAN_SULFATE_METABOLISM	0.0231695	0.583276	0.77467	47	0.693	0.89748		0.023937	0.00019349	0.000893549	2049	0.121	0.582171
REACTOME_CHROMOSOME_MAINTENANCE	-0.160749	6.84789e-08	5.10369e-06	95	0.003	0.1065		-0.0224393	0.00209036	0.006748	1584	0.272	0.717569
REACTOME_CHYLOMICRON_MEDIATED_LIPID_TRANSPORT	0.0208685	0.779706	0.891664	15	0.862	0.958042		0.0388598	0.0179021	0.0411222	310	0.328	0.76
REACTOME_CIRCADIAN_CLOCK	-0.0156681	0.713587	0.859424	46	0.762	0.920941		-0.00843018	0.182203	0.280799	2117	0.644	0.887585
REACTOME_CIRCADIAN_REPRESSION_OF_EXPRESSION_BY_REV_ERBA	0.00534723	0.932445	0.973153	21	0.933	0.986015		-0.0109798	0.190365	0.289355	1195	0.666	0.900101
REACTOME_CITRIC_ACID_CYCLE_TCA_CYCLE	0.24758	0.000188654	0.00314506	19	0.024	0.255138		-0.0377981	0.0160391	0.0371637	339	0.272	0.717569
REACTOME_CLASS_A1_RHODOPSIN_LIKE_RECEPTORS	0.0232	0.17977	0.365289	289	0.569	0.814654		0.00327205	0.502319	0.604055	3590	0.814	0.942228
REACTOME_CLASS_B_2_SECRETIN_FAMILY_RECEPTORS	-0.0378154	0.240811	0.440908	81	0.418	0.725236		-0.0309039	2.20164e-06	2.18521e-05	1982	0.24	0.696943
REACTOME_CLASS_C_3_METABOTROPIC_GLUTAMATE_PHEROMONE_RECEPTORS	0.208973	0.00680833	0.0442367	14	0.028	0.261984		0.0324975	0.00344971	0.0101476	678	0.257	0.708429
REACTOME_CLASS_I_MHC_MEDIATED_ANTIGEN_PROCESSING_PRESENTATION	-0.0494349	0.0160025	0.0754067	203	0.164	0.512819		-0.0187685	8.43314e-06	6.55911e-05	4852	0.234	0.68854
REACTOME_CLEAVAGE_OF_GROWING_TRANSCRIPT_IN_THE_TERMINATION_REGION_	-0.0744287	0.158696	0.342744	30	0.453	0.749229		-0.0418703	0.000116779	0.000588318	709	0.15	0.611963
REACTOME_COLLAGEN_FORMATION	0.136276	0.000485141	0.00621418	55	0.047	0.326029		-0.00993397	0.159677	0.252826	1689	0.608	0.872319
REACTOME_COMMON_PATHWAY	-0.0408854	0.596499	0.782409	14	0.776	0.926441		0.0825106	0.00261063	0.00805601	111	0.064	0.467297
REACTOME_COMPLEMENT_CASCADE	-0.0964406	0.0776302	0.214286	28	0.462	0.753362		0.0296233	0.0404053	0.0824363	400	0.198	0.652212
REACTOME_CONVERSION_FROM_APC_C_CDC20_TO_APC_C_CDH1_IN_LATE_ANAPHASE	-0.138806	0.0628245	0.186414	15	0.126	0.456703		-0.0420018	0.0131542	0.0315227	291	0.109	0.570748
REACTOME_COSTIMULATION_BY_THE_CD28_FAMILY	-0.101004	0.00693467	0.0448277	60	0.035	0.281633		-0.0136345	0.093495	0.165577	1272	0.481	0.826391
REACTOME_CREB_PHOSPHORYLATION_THROUGH_THE_ACTIVATION_OF_CAMKII	0.0579184	0.506091	0.706965	11	NA	NA		-0.00095868	0.937368	0.958999	562	0.976	0.994697
REACTOME_CREB_PHOSPHORYLATION_THROUGH_THE_ACTIVATION_OF_RAS	-0.0111673	0.85622	0.932786	22	0.894	0.974759		-0.00858338	0.416047	0.525491	752	0.71	0.914613
REACTOME_CRMPS_IN_SEMA3A_SIGNALING	0.0855005	0.268215	0.468729	14	0.372	0.70006		0.0627403	1.03826e-08	2.06101e-07	697	0.088	0.5225
REACTOME_CROSS_PRESENTATION_OF_SOLUBLE_EXOGENOUS_ANTIGENS_ENDOSOMES	-0.0734021	0.122823	0.289789	37	0.153	0.500777		-0.0272952	0.00224416	0.0071405	1052	0.167	0.629408
REACTOME_CS_DS_DEGRADATION	-0.0647786	0.437326	0.639125	12	0.632	0.8637		-0.0351022	0.0359954	0.0748029	298	0.363	0.781348
REACTOME_CTLA4_INHIBITORY_SIGNALING	-0.193522	0.00275227	0.0220704	20	0.028	0.261984		-0.012678	0.308349	0.423224	540	0.633	0.882484
REACTOME_CTNNB1_PHOSPHORYLATION_CASCADE	-0.148822	0.0539596	0.167678	14	NA	NA		-0.00795473	0.645631	0.73644	279	0.753	0.924527
REACTOME_CYCLIN_A_B1_ASSOCIATED_EVENTS_DURING_G2_M_TRANSITION	-0.126764	0.0893146	0.232365	15	0.204	0.560005		-0.040925	0.0237035	0.0518844	255	0.281	0.721054
REACTOME_CYCLIN_E_ASSOCIATED_EVENTS_DURING_G1_S_TRANSITION_	-0.092086	0.0275706	0.110196	48	0.094	0.436377		-0.0213241	0.00529563	0.014552	1439	0.278	0.721054
REACTOME_CYTOCHROME_P450_ARRANGED_BY_SUBSTRATE_TYPE	0.0715751	0.090123	0.232558	47	0.563	0.814654		0.00291011	0.795195	0.851697	666	0.884	0.964495
REACTOME_CYTOKINE_SIGNALING_IN_IMMUNE_SYSTEM	-0.0835433	6.13984e-06	0.000228799	252	0.011	0.19242		-0.0288857	1.26663e-10	6.01649e-09	4253	0.061	0.460966
REACTOME_CYTOSOLIC_SULFONATION_OF_SMALL_MOLECULES	0.156925	0.0421451	0.142171	14	0.271	0.621582		0.0765002	0.000282067	0.00121407	188	0.17	0.631564
REACTOME_CYTOSOLIC_TRNA_AMINOACYLATION	0.256447	1.39083e-05	0.000417462	24	0.008	0.172429		-0.0196716	0.13772	0.226133	476	0.597	0.87128
REACTOME_DAG_AND_IP3_SIGNALING	-0.079164	0.162723	0.346872	26	0.313	0.657983		-0.0202603	0.0354029	0.0739182	904	0.367	0.781853
REACTOME_DARPP_32_EVENTS	-0.00556315	0.934913	0.973807	18	0.944	0.989258		-0.0373302	0.000103362	0.000533232	907	0.095	0.539957
REACTOME_DCC_MEDIATED_ATTRACTIVE_SIGNALING	0.0166511	0.841752	0.922578	12	0.854	0.957972		0.0189937	0.0591819	0.11293	827	0.426	0.809007
REACTOME_DEADENYLATION_DEPENDENT_MRNA_DECAY	0.0210997	0.675221	0.833353	33	0.72	0.902746		-0.0347981	0.00219995	0.00701664	648	0.234	0.68854
REACTOME_DEADENYLATION_OF_MRNA	-0.0252657	0.743535	0.874679	14	0.729	0.908361		-0.0447388	0.00907408	0.0230756	284	0.213	0.655764
REACTOME_DEFENSINS	-0.193756	2.89997e-05	0.000706588	39	0.136	0.471701		0.091256	3.79994e-05	0.000231831	170	0.009	0.278372
REACTOME_DEGRADATION_OF_THE_EXTRACELLULAR_MATRIX	0.101108	0.0643138	0.189501	28	0.233	0.587121		-0.0141451	0.396525	0.508561	300	0.61	0.872366
REACTOME_DEPOSITION_OF_NEW_CENPA_CONTAINING_NUCLEOSOMES_AT_THE_CENTROMERE	-0.160614	0.000380432	0.00535564	41	0.06	0.367614		-0.0255126	0.0861492	0.154836	378	0.447	0.813583
REACTOME_DESTABILIZATION_OF_MRNA_BY_AUF1_HNRNP_D0	-0.0885786	0.0591679	0.177644	38	0.11	0.436743		-0.0415777	2.16282e-06	2.1792e-05	1090	0.032	0.370087
REACTOME_DESTABILIZATION_OF_MRNA_BY_BRF1	-0.029061	0.678427	0.836154	17	0.73	0.908361		-0.0124638	0.487532	0.588935	259	0.772	0.930879
REACTOME_DESTABILIZATION_OF_MRNA_BY_KSRP	0.0612502	0.396542	0.598831	16	0.528	0.799638		-0.0212673	0.295396	0.40882	202	0.549	0.861602
REACTOME_DESTABILIZATION_OF_MRNA_BY_TRISTETRAPROLIN_TTP	0.0101279	0.885111	0.952791	17	0.907	0.980958		-0.0198752	0.267349	0.378673	260	0.611	0.872857
REACTOME_DEVELOPMENTAL_BIOLOGY	-0.000786423	0.959602	0.981695	362	0.991	0.996781		-0.0120793	1.97338e-06	2.05047e-05	14302	0.158	0.618059
REACTOME_DIABETES_PATHWAYS	0.0182102	0.482369	0.68653	126	0.627	0.8637		-0.0109887	0.0404124	0.0824363	2958	0.608	0.872319
REACTOME_DNA_REPAIR	-0.125893	2.16465e-05	0.000583535	96	0.011	0.19242		0.00593425	0.351325	0.464475	2085	0.735	0.91875
REACTOME_DNA_REPLICATION	-0.182604	3.35944e-16	4.72935e-14	170	0	0		-0.0169108	0.000379483	0.00155775	3777	0.239	0.695558
REACTOME_DNA_STRAND_ELONGATION	-0.0952138	0.0713755	0.203677	30	0.211	0.563621		-0.00754382	0.493444	0.594457	690	0.767	0.927373
REACTOME_DOPAMINE_NEUROTRANSMITTER_RELEASE_CYCLE	0.110438	0.226677	0.424928	10	NA	NA		0.0216104	0.105898	0.182677	468	0.603	0.87128
REACTOME_DOUBLE_STRAND_BREAK_REPAIR	-0.104223	0.0908341	0.232969	22	0.304	0.65025		0.0154682	0.254304	0.365647	454	0.565	0.867856
REACTOME_DOWNREGULATION_OF_SMAD2_3_SMAD4_TRANSCRIPTIONAL_ACTIVITY	-0.137075	0.0871592	0.229109	13	0.134	0.467451		-0.0513644	0.000427243	0.00172192	393	0.049	0.409874
REACTOME_DOWNREGULATION_OF_TGF_BETA_RECEPTOR_SIGNALING	-0.089329	0.216283	0.412075	16	0.394	0.712981		-0.0483164	0.000149638	0.000734384	515	0.123	0.582171
REACTOME_DOWNSTREAM_SIGNAL_TRANSDUCTION	-0.0338875	0.284524	0.488471	84	0.64	0.867955		-0.0267752	4.89555e-06	4.17377e-05	2468	0.132	0.585728
REACTOME_DOWNSTREAM_SIGNALING_EVENTS_OF_B_CELL_RECEPTOR_BCR	-0.0861026	0.00965899	0.0544506	76	0.073	0.400505		-0.0256969	6.83046e-06	5.57332e-05	2600	0.079	0.495613
REACTOME_DOWNSTREAM_SIGNALING_OF_ACTIVATED_FGFR	-0.0630542	0.0393552	0.136566	90	0.306	0.65025		-0.0231792	1.54814e-05	0.000109522	2956	0.269	0.716766
REACTOME_DOWNSTREAM_TCR_SIGNALING	-0.0335454	0.498969	0.699329	34	0.521	0.799638		-0.0475633	3.67973e-05	0.000225532	630	0.014	0.310333
REACTOME_DSCAM_INTERACTIONS	0.206351	0.0178349	0.080992	11	NA	NA		0.0468222	3.21616e-05	0.000202876	660	0.118	0.579114
REACTOME_E2F_ENABLED_INHIBITION_OF_PRE_REPLICATION_COMPLEX_FORMATION	-0.292721	0.00135341	0.0137117	10	NA	NA		-0.0646304	0.0053381	0.0146084	155	0.22	0.668023
REACTOME_E2F_MEDIATED_REGULATION_OF_DNA_REPLICATION	-0.180976	0.000401453	0.00550984	32	0.012	0.198411		-0.015455	0.147936	0.238203	734	0.547	0.860959
REACTOME_EARLY_PHASE_OF_HIV_LIFE_CYCLE	-0.081378	0.329189	0.531315	12	0.347	0.690278		-0.0278566	0.0955315	0.167621	299	0.308	0.740486
REACTOME_EFFECTS_OF_PIP2_HYDROLYSIS	-0.0787516	0.191426	0.381346	23	0.447	0.74727		-0.0391734	1.38516e-05	0.00010067	1033	0.022	0.321538
REACTOME_EGFR_DOWNREGULATION	-0.00668685	0.919674	0.967554	19	0.922	0.983956		-0.0315193	0.00879633	0.0225416	578	0.14	0.591577
REACTOME_EICOSANOID_LIGAND_BINDING_RECEPTORS	-0.00398254	0.95887	0.981695	14	0.969	0.989495		-0.0258053	0.300989	0.415264	134	0.407	0.808624
REACTOME_ELONGATION_ARREST_AND_RECOVERY	-0.146012	0.0276653	0.110226	19	0.031	0.274697		-0.0302092	0.0363742	0.0754722	401	0.429	0.809007
REACTOME_ENDOGENOUS_STEROLS	-0.0630278	0.39824	0.599965	15	0.643	0.869094		0.0248729	0.11906	0.201977	328	0.251	0.705772
REACTOME_ENDOSOMAL_SORTING_COMPLEX_REQUIRED_FOR_TRANSPORT_ESCRT	0.177843	0.00390803	0.0279745	22	0.01	0.188594		-0.0121884	0.397309	0.509076	403	0.656	0.892106
REACTOME_ENERGY_DEPENDENT_REGULATION_OF_MTOR_BY_LKB1_AMPK	0.0371063	0.596533	0.782409	17	0.654	0.87904		-0.0529561	0.000972416	0.00345224	324	0.183	0.647682
REACTOME_ENOS_ACTIVATION_AND_REGULATION	-0.0544769	0.450814	0.653525	16	0.571	0.814654		-0.0182983	0.1863	0.284803	436	0.487	0.826391
REACTOME_ER_PHAGOSOME_PATHWAY	-0.0159371	0.714973	0.859461	44	0.745	0.914766		-0.0353054	1.94248e-05	0.00013317	1230	0.114	0.572151
REACTOME_ERK_MAPK_TARGETS	-0.0513302	0.438867	0.639867	19	0.512	0.794364		-0.0568687	5.0884e-07	6.20878e-06	653	0.048	0.409874
REACTOME_ERKS_ARE_INACTIVATED	-0.046773	0.608635	0.792539	10	NA	NA		-0.0258382	0.146224	0.237169	264	0.449	0.813583
REACTOME_ETHANOL_OXIDATION	0.107193	0.240622	0.440908	10	0.523	0.799638		-0.0989647	0.00793191	0.0207258	60	0.047	0.409874
REACTOME_EXTENSION_OF_TELOMERES	-0.141862	0.0108005	0.0589836	27	0.041	0.303601		-0.0104206	0.327328	0.440634	740	0.746	0.924527
REACTOME_EXTRACELLULAR_MATRIX_ORGANIZATION	0.124964	8.73782e-05	0.0017032	83	0.016	0.23317		-0.0106112	0.103464	0.179401	1989	0.487	0.826391
REACTOME_EXTRINSIC_PATHWAY_FOR_APOPTOSIS	-0.354702	9.58276e-06	0.000319509	13	0.023	0.255138		0.00288307	0.919685	0.944764	102	0.953	0.989213
REACTOME_FACILITATIVE_NA_INDEPENDENT_GLUCOSE_TRANSPORTERS	0.121576	0.144915	0.321553	12	0.305	0.65025		-0.0602601	0.0301156	0.0639837	108	0.429	0.809007
REACTOME_FACTORS_INVOLVED_IN_MEGAKARYOCYTE_DEVELOPMENT_AND_PLATELET_PRODUCTION	-0.0728429	0.00888534	0.0522831	109	0.013	0.206461		-0.0248295	1.99258e-06	2.05436e-05	3121	0.059	0.456221
REACTOME_FANCONI_ANEMIA_PATHWAY	-0.348298	1.49912e-07	9.49693e-06	19	0.001	0.04828		-0.00618028	0.678428	0.76273	376	0.811	0.941552
REACTOME_FATTY_ACID_TRIACYLGLYCEROL_AND_KETONE_BODY_METABOLISM	0.0603526	0.00805273	0.0492889	164	0.158	0.504513		-0.0066268	0.153519	0.245475	3972	0.579	0.870655
REACTOME_FATTY_ACYL_COA_BIOSYNTHESIS	0.141802	0.0373796	0.133033	18	0.197	0.554263		0.0536753	0.000131749	0.00065383	424	0.048	0.409874
REACTOME_FGFR_LIGAND_BINDING_AND_ACTIVATION	-0.0576614	0.349504	0.552391	22	0.562	0.814654		-0.015398	0.144565	0.235627	752	0.706	0.914613
REACTOME_FGFR1_LIGAND_BINDING_AND_ACTIVATION	0.0336654	0.662875	0.826637	14	0.746	0.915063		0.00908245	0.465933	0.567483	539	0.804	0.939509
REACTOME_FGFR2C_LIGAND_BINDING_AND_ACTIVATION	0.00506414	0.951582	0.979757	12	NA	NA		-0.00255334	0.844251	0.891154	495	0.957	0.990008
REACTOME_FGFR4_LIGAND_BINDING_AND_ACTIVATION	-0.05524	0.50775	0.707721	12	NA	NA		-0.0217618	0.129769	0.21601	405	0.696	0.914613
REACTOME_FORMATION_OF_ATP_BY_CHEMIOSMOTIC_COUPLING	0.127201	0.144198	0.321088	11	0.371	0.70006		-0.0844388	8.02473e-05	0.000437413	182	0.02	0.321538
REACTOME_FORMATION_OF_FIBRIN_CLOT_CLOTTING_CASCADE	-0.0753324	0.147038	0.324559	31	0.483	0.769681		0.0173988	0.310236	0.424937	284	0.536	0.851833
REACTOME_FORMATION_OF_INCISION_COMPLEX_IN_GG_NER	-0.0687399	0.287543	0.489698	20	0.369	0.70006		-0.0118451	0.378544	0.490228	462	0.65	0.889856
REACTOME_FORMATION_OF_RNA_POL_II_ELONGATION_COMPLEX_	-0.109062	0.0357879	0.129552	31	0.092	0.435081		-0.0225688	0.0547785	0.105588	606	0.435	0.809007
REACTOME_FORMATION_OF_THE_HIV1_EARLY_ELONGATION_COMPLEX	-0.104356	0.0904234	0.232816	22	0.176	0.524912		-0.0207201	0.123068	0.207454	463	0.437	0.809007
REACTOME_FORMATION_OF_THE_TERNARY_COMPLEX_AND_SUBSEQUENTLY_THE_43S_COMPLEX	0.0362517	0.547599	0.745477	23	0.638	0.867191		-0.0201672	0.0414279	0.0835996	857	0.328	0.76
REACTOME_FORMATION_OF_TRANSCRIPTION_COUPLED_NER_TC_NER_REPAIR_COMPLEX	-0.0700774	0.255539	0.453861	22	0.351	0.691121		-0.000662875	0.96015	0.974541	475	0.99	0.996745
REACTOME_FORMATION_OF_TUBULIN_FOLDING_INTERMEDIATES_BY_CCT_TRIC	-0.0148937	0.817756	0.910925	20	0.86	0.958042		0.00545116	0.738586	0.811834	313	0.889	0.965989
REACTOME_FRS2_MEDIATED_CASCADE	-0.0300507	0.54473	0.743534	34	0.688	0.895516		-0.0219795	0.0160965	0.037232	1006	0.498	0.833955
REACTOME_G_ALPHA_I_SIGNALLING_EVENTS	0.0232524	0.280134	0.482242	184	0.608	0.852741		-0.00468608	0.400653	0.5109	2731	0.801	0.938617
REACTOME_G_ALPHA_Q_SIGNALLING_EVENTS	0.0211353	0.342186	0.546033	172	0.549	0.809555		-0.0270393	3.28393e-08	5.59953e-07	3566	0.035	0.372803
REACTOME_G_ALPHA_S_SIGNALLING_EVENTS	-0.00867211	0.752238	0.877949	112	0.806	0.939944		-0.0157586	0.00605411	0.0163326	2573	0.187	0.647682
REACTOME_G_ALPHA_Z_SIGNALLING_EVENTS	0.00205013	0.965165	0.983466	38	0.965	0.989495		-0.0213178	0.0184136	0.0419352	1026	0.438	0.809007
REACTOME_G_ALPHA1213_SIGNALLING_EVENTS	-0.037751	0.301204	0.502139	63	0.427	0.732087		-0.0178761	0.00878019	0.0225416	1813	0.296	0.73311
REACTOME_G_BETA_GAMMA_SIGNALLING_THROUGH_PI3KGAMMA	0.00569774	0.933342	0.973288	18	0.949	0.989495		-0.0194474	0.157301	0.250235	442	0.548	0.861513
REACTOME_G_BETA_GAMMA_SIGNALLING_THROUGH_PLC_BETA	0.00242146	0.974985	0.988245	14	NA	NA		-0.0624694	3.14203e-05	0.000200909	371	0.011	0.304792
REACTOME_G_PROTEIN_ACTIVATION	0.0338678	0.591336	0.778908	21	0.656	0.879769		-0.0316468	0.014893	0.0348726	495	0.306	0.737283
REACTOME_G_PROTEIN_BETA_GAMMA_SIGNALLING	0.00741569	0.906416	0.966193	21	0.921	0.983956		-0.0243937	0.041027	0.0830531	587	0.434	0.809007
REACTOME_G0_AND_EARLY_G1	-0.102254	0.0971023	0.245077	22	0.246	0.598633		-0.0193238	0.165238	0.260696	431	0.5	0.833955
REACTOME_G1_PHASE	-0.128727	0.0165344	0.077346	29	0.178	0.526583		-0.0392023	8.60125e-05	0.000459424	841	0.129	0.585728
REACTOME_G1_S_SPECIFIC_TRANSCRIPTION	-0.172324	0.0139508	0.070421	17	0.017	0.23317		-0.0143607	0.303537	0.417913	429	0.714	0.914613
REACTOME_G1_S_TRANSITION	-0.116695	0.000125983	0.00231334	91	0.01	0.188594		-0.0173811	0.00407408	0.0117284	2312	0.256	0.708429
REACTOME_G2_M_CHECKPOINTS	-0.180771	6.35467e-05	0.00127799	41	0.023	0.255138		-0.0145936	0.203312	0.305543	636	0.56	0.867593
REACTOME_GAB1_SIGNALOSOME	-0.0968643	0.0476256	0.152764	35	0.166	0.512898		-0.0212767	0.0116433	0.0284139	1181	0.313	0.744421
REACTOME_GABA_A_RECEPTOR_ACTIVATION	-0.169574	0.0420278	0.142171	12	0.144	0.4828		-0.000857408	0.962575	0.97513	250	0.983	0.995479
REACTOME_GABA_B_RECEPTOR_ACTIVATION	-0.0192478	0.706615	0.857654	32	0.759	0.920941		-0.0138995	0.176566	0.273739	792	0.628	0.878275
REACTOME_GABA_RECEPTOR_ACTIVATION	-0.0464772	0.27625	0.477502	46	0.437	0.739393		-0.0129196	0.146914	0.237516	1058	0.594	0.87128
REACTOME_GABA_SYNTHESIS_RELEASE_REUPTAKE_AND_DEGRADATION	0.124833	0.0840035	0.224855	16	0.094	0.436377		0.0233468	0.0556676	0.107142	562	0.515	0.846215
REACTOME_GAMMA_CARBOXYLATION_TRANSPORT_AND_AMINO_TERMINAL_CLEAVAGE_OF_PROTEINS	-0.0340698	0.709178	0.858623	10	NA	NA		0.0546368	0.063764	0.120122	96	0.211	0.655764
REACTOME_GAP_JUNCTION_ASSEMBLY	0.0424552	0.533135	0.732635	18	0.66	0.881217		-0.00873598	0.602362	0.700299	297	0.779	0.934238
REACTOME_GAP_JUNCTION_TRAFFICKING	0.0432902	0.445239	0.648411	26	0.567	0.814654		-0.0119943	0.380418	0.491696	447	0.668	0.900101
REACTOME_GASTRIN_CREB_SIGNALLING_PATHWAY_VIA_PKC_AND_MAPK	0.0192188	0.364534	0.567401	190	0.567	0.814654		-0.0293607	1.81104e-10	8.02894e-09	4041	0.013	0.310333
REACTOME_GENERATION_OF_SECOND_MESSENGER_MOLECULES	0.032693	0.5569	0.75063	27	0.632	0.8637		-0.0136511	0.39884	0.510546	319	0.711	0.914613
REACTOME_GENERIC_TRANSCRIPTION_PATHWAY	-0.124765	1.72645e-13	1.82285e-11	302	0.033	0.274697		-0.00895932	0.0237186	0.0518844	5516	0.642	0.887585
REACTOME_GLOBAL_GENOMIC_NER_GG_NER	-0.0501206	0.327013	0.529152	32	0.467	0.755588		-0.00883874	0.445691	0.550098	623	0.669	0.900101
REACTOME_GLUCAGON_SIGNALING_IN_METABOLIC_REGULATION	-0.0481403	0.395935	0.598627	26	0.352	0.691961		-0.0265363	0.022366	0.0496608	620	0.355	0.774016
REACTOME_GLUCAGON_TYPE_LIGAND_RECEPTORS	-0.0611526	0.27184	0.473107	27	0.27	0.620743		-0.0319214	0.00906783	0.0230756	559	0.201	0.652212
REACTOME_GLUCONEOGENESIS	0.129093	0.0144993	0.0709292	30	0.155	0.500777		-0.026032	0.0220944	0.0491398	647	0.161	0.622471
REACTOME_GLUCOSE_METABOLISM	0.120946	0.00147742	0.0142893	58	0.085	0.427479		-0.0340624	1.79813e-05	0.000124558	1333	0.018	0.321538
REACTOME_GLUCOSE_TRANSPORT	0.0264895	0.572555	0.766837	38	0.718	0.902746		-0.0487069	5.5537e-05	0.000317014	573	0.079	0.495613
REACTOME_GLUCURONIDATION	0.207242	0.0173473	0.0796511	11	NA	NA		-0.0141169	0.742915	0.813902	45	0.874	0.958608
REACTOME_GLUTAMATE_NEUROTRANSMITTER_RELEASE_CYCLE	0.0937539	0.224725	0.423701	14	0.232	0.587121		0.00586566	0.631886	0.723866	558	0.832	0.951796
REACTOME_GLUTATHIONE_CONJUGATION	0.121054	0.0446314	0.147645	23	0.122	0.450318		-0.0159091	0.391655	0.503059	242	0.529	0.851833
REACTOME_GLYCEROPHOSPHOLIPID_BIOSYNTHESIS	0.0771844	0.0160098	0.0754067	82	0.214	0.563969		-0.0090218	0.285966	0.397009	1175	0.652	0.890308
REACTOME_GLYCOGEN_BREAKDOWN_GLYCOGENOLYSIS	0.198162	0.0134022	0.0684701	13	0.106	0.436743		-0.031513	0.0503775	0.0982436	322	0.41	0.808624
REACTOME_GLYCOLYSIS	0.0775504	0.179906	0.365289	25	0.411	0.725236		-0.0210712	0.138524	0.227071	413	0.473	0.820196
REACTOME_GLYCOPROTEIN_HORMONES	-0.16391	0.0493761	0.157185	12	0.221	0.568757		0.0159615	0.361384	0.473538	273	0.687	0.91007
REACTOME_GLYCOSAMINOGLYCAN_METABOLISM	-0.00991191	0.723032	0.861853	108	0.878	0.96604		0.0291941	3.35596e-10	1.23984e-08	3964	0.031	0.368125
REACTOME_GLYCOSPHINGOLIPID_METABOLISM	-0.0095537	0.840828	0.922363	37	0.913	0.983956		-0.00454905	0.703417	0.782381	586	0.863	0.958608
REACTOME_GOLGI_ASSOCIATED_VESICLE_BIOGENESIS	0.0588469	0.168032	0.351023	46	0.17	0.515553		-0.00087507	0.921117	0.945282	1075	0.968	0.992889
REACTOME_GPCR_DOWNSTREAM_SIGNALING	0.13153	3.4255e-33	1.4467e-30	767	0.021	0.25096		-0.0112133	4.72493e-10	1.65373e-08	33121	0.397	0.806122
REACTOME_GPCR_LIGAND_BINDING	0.0173708	0.24986	0.447137	384	0.626	0.8637		-0.00428562	0.253051	0.364241	6186	0.746	0.924527
REACTOME_GPVI_MEDIATED_ACTIVATION_CASCADE	-0.0334308	0.54074	0.739868	28	0.73	0.908361		-0.00568456	0.553285	0.650623	912	0.83	0.950818
REACTOME_GRB2_EVENTS_IN_ERBB2_SIGNALING	-0.0756835	0.241616	0.441743	20	0.275	0.621582		-0.0052576	0.549484	0.647884	1088	0.793	0.937099
REACTOME_GRB2_SOS_PROVIDES_LINKAGE_TO_MAPK_SIGNALING_FOR_INTERGRINS_	0.160082	0.0381747	0.133611	14	0.091	0.435081		-0.00618438	0.702743	0.782381	318	0.795	0.937099
REACTOME_GROWTH_HORMONE_RECEPTOR_SIGNALING	-0.0380381	0.528044	0.728792	23	0.7	0.897875		-0.0623586	3.64207e-06	3.31777e-05	461	0.009	0.278372
REACTOME_HDL_MEDIATED_LIPID_TRANSPORT	0.136076	0.078051	0.214513	14	0.249	0.601086		0.0368443	0.079511	0.144664	189	0.379	0.795495
REACTOME_HEMOSTASIS	-0.0479978	0.000984489	0.0109416	414	0.054	0.360788		-0.0188719	1.04776e-10	5.16119e-09	10511	0.147	0.601569
REACTOME_HEPARAN_SULFATE_HEPARIN_HS_GAG_METABOLISM	0.0175654	0.664913	0.828325	51	0.806	0.939944		0.0391681	9.42197e-13	9.58961e-11	2822	0.037	0.372803
REACTOME_HIGHLY_CALCIUM_PERMEABLE_POSTSYNAPTIC_NICOTINIC_ACETYLCHOLINE_RECEPTORS	0.275812	0.000942747	0.0106648	12	0.013	0.206461		-0.0252384	0.401851	0.511937	92	0.576	0.869557
REACTOME_HIV_INFECTION	-0.0492153	0.0344152	0.126031	157	0.203	0.560005		-0.0223171	5.11645e-06	4.30688e-05	3565	0.154	0.615075
REACTOME_HIV_LIFE_CYCLE	-0.0409257	0.167375	0.351023	96	0.455	0.749229		-0.0256551	0.000298525	0.00126445	1675	0.154	0.615075
REACTOME_HOMOLOGOUS_RECOMBINATION_REPAIR_OF_REPLICATION_INDEPENDENT_DOUBLE_STRAND_BREAKS	-0.12068	0.0948349	0.241277	16	0.242	0.593687		0.0358938	0.0258297	0.0559503	322	0.207	0.655764
REACTOME_HORMONE_LIGAND_BINDING_RECEPTORS	-0.099789	0.274662	0.476057	10	0.459	0.753362		-0.00523386	0.783509	0.844462	230	0.868	0.958608
REACTOME_HORMONE_SENSITIVE_LIPASE_HSL_MEDIATED_TRIACYLGLYCEROL_HYDROLYSIS	0.0720181	0.430474	0.633462	10	NA	NA		-0.0696996	0.000486516	0.00193154	209	0.01	0.295556
REACTOME_HOST_INTERACTIONS_OF_HIV_FACTORS	-0.0520729	0.0774345	0.214213	97	0.168	0.513357		-0.0235556	5.51696e-05	0.000316274	2484	0.168	0.629408
REACTOME_HS_GAG_BIOSYNTHESIS	0.0609577	0.24835	0.447137	30	0.548	0.809555		0.0470876	6.53347e-15	1.08619e-12	2319	0.044	0.409231
REACTOME_HS_GAG_DEGRADATION	-0.0159003	0.805677	0.903357	20	0.874	0.962516		0.0367912	3.41417e-06	3.15337e-05	1340	0.191	0.649693
REACTOME_HYALURONAN_METABOLISM	-0.176735	0.0221013	0.0948375	14	0.033	0.274697		-0.029577	0.08845	0.158116	277	0.339	0.768092
REACTOME_HYALURONAN_UPTAKE_AND_DEGRADATION	-0.235069	0.0100735	0.0562255	10	0.02	0.25096		-0.0285706	0.145153	0.236296	217	0.516	0.846215
REACTOME_IL_2_SIGNALING	-0.0769054	0.101364	0.252315	38	0.189	0.54315		-0.0585758	3.52016e-08	5.92634e-07	742	0.073	0.478276
REACTOME_IL_3_5_AND_GM_CSF_SIGNALING	-0.0863155	0.0561872	0.170913	41	0.185	0.538374		-0.0292034	0.00351762	0.0102597	837	0.309	0.740486
REACTOME_IL_6_SIGNALING	-0.22401	0.0141972	0.0708182	10	NA	NA		-0.041307	0.044207	0.088017	198	0.366	0.781348
REACTOME_IL_7_SIGNALING	-0.152822	0.0793469	0.217603	11	0.293	0.641835		-0.064917	8.50536e-05	0.000457915	306	0.098	0.547647
REACTOME_IL_RECEPTOR_SHC_SIGNALING	-0.139198	0.014104	0.0708182	26	0.118	0.448421		-0.0481936	0.000224777	0.0010134	490	0.199	0.652212
REACTOME_IL1_SIGNALING	-0.115576	0.0165436	0.077346	36	0.038	0.294013		-0.00152435	0.882547	0.922789	787	0.944	0.987821
REACTOME_IMMUNE_SYSTEM	-0.0863828	4.7855e-16	6.06323e-14	819	0	0		-0.0230364	4.53088e-21	3.01303e-18	15572	0.088	0.5225
REACTOME_IMMUNOREGULATORY_INTERACTIONS_BETWEEN_A_LYMPHOID_AND_A_NON_LYMPHOID_CELL	0.019549	0.610449	0.794085	57	0.859	0.958042		-0.000662871	0.95483	0.971633	611	0.984	0.995479
REACTOME_INCRETIN_SYNTHESIS_SECRETION_AND_INACTIVATION	-0.0997469	0.13251	0.303599	19	0.097	0.436743		-0.00456062	0.7158	0.792685	533	0.905	0.97008
REACTOME_INFLAMMASOMES	-0.0977635	0.175985	0.359633	16	0.287	0.632133		-0.0240915	0.14606	0.237169	304	0.568	0.867856
REACTOME_INFLUENZA_LIFE_CYCLE	-0.0350905	0.27061	0.471614	83	0.462	0.753362		-0.029456	1.05082e-05	7.76438e-05	1889	0.267	0.715948
REACTOME_INFLUENZA_VIRAL_RNA_TRANSCRIPTION_AND_REPLICATION	-0.0459985	0.261369	0.460062	50	0.434	0.738841		-0.0196743	0.011617	0.0284018	1384	0.494	0.831671
REACTOME_INHIBITION_OF_INSULIN_SECRETION_BY_ADRENALINE_NORADRENALINE	0.0172943	0.794236	0.897792	19	0.82	0.94712		-0.0129011	0.310866	0.425362	516	0.659	0.895271
REACTOME_INHIBITION_OF_REPLICATION_INITIATION_OF_DAMAGED_DNA_BY_RB1_E2F1	-0.132792	0.127377	0.296666	11	NA	NA		-0.0289754	0.0409199	0.0830531	416	0.436	0.809007
REACTOME_INHIBITION_OF_THE_PROTEOLYTIC_ACTIVITY_OF_APC_C_REQUIRED_FOR_THE_ONSET_OF_ANAPHASE_BY_MITOTIC_SPINDLE_CHECKPOINT_COMPONENTS	-0.161849	0.020939	0.0905452	17	0.067	0.386933		-0.0339881	0.0229623	0.0505627	374	0.199	0.652212
REACTOME_INHIBITION_OF_VOLTAGE_GATED_CA2_CHANNELS_VIA_GBETA_GAMMA_SUBUNITS	-0.0387314	0.559149	0.75286	19	0.644	0.869472		-0.0351614	0.00765352	0.0200378	481	0.202	0.652212
REACTOME_INITIAL_TRIGGERING_OF_COMPLEMENT	-0.0558401	0.503151	0.703633	12	0.721	0.902746		0.0358158	0.084177	0.151907	194	0.435	0.809007
REACTOME_INNATE_IMMUNE_SYSTEM	-0.122127	7.02039e-11	5.92989e-09	245	0.005	0.147195		-0.0232949	4.51633e-07	5.61376e-06	4019	0.041	0.386738
REACTOME_INSULIN_RECEPTOR_RECYCLING	-0.0036019	0.953398	0.980483	22	0.966	0.989495		0.00258605	0.875002	0.917786	309	0.955	0.989213
REACTOME_INSULIN_RECEPTOR_SIGNALLING_CASCADE	-0.0192358	0.550736	0.745477	81	0.705	0.901125		-0.0280562	1.42968e-05	0.000102782	2021	0.249	0.705772
REACTOME_INSULIN_SYNTHESIS_AND_PROCESSING	0.0780359	0.251986	0.449672	18	0.27	0.620743		0.0350796	0.00088771	0.00319961	752	0.297	0.734219
REACTOME_INTEGRATION_OF_ENERGY_METABOLISM	-0.00243132	0.931999	0.973153	104	0.965	0.989495		-0.010126	0.0658497	0.123065	2803	0.573	0.867984
REACTOME_INTEGRIN_ALPHAIIB_BETA3_SIGNALING	0.064085	0.258446	0.457128	26	0.305	0.65025		-0.0239006	0.0238122	0.0520036	749	0.422	0.809007
REACTOME_INTEGRIN_CELL_SURFACE_INTERACTIONS	0.0191197	0.563013	0.757259	77	0.742	0.91201		-0.0216535	0.000568181	0.00220315	2142	0.119	0.579744
REACTOME_INTERACTION_BETWEEN_L1_AND_ANKYRINS	0.138155	0.0285133	0.110918	21	0.212	0.563621		-0.0447167	3.33618e-05	0.000208316	721	0.031	0.368125
REACTOME_INTERACTIONS_OF_VPR_WITH_HOST_CELLULAR_PROTEINS	-0.0287517	0.579961	0.772672	31	0.757	0.920941		-0.0507744	0.000388402	0.00158946	408	0.046	0.409874
REACTOME_INTERFERON_ALPHA_BETA_SIGNALING	-0.0582499	0.113506	0.273407	62	0.549	0.809555		-0.0219613	0.071598	0.132441	563	0.466	0.814428
REACTOME_INTERFERON_GAMMA_SIGNALING	-0.0347946	0.352319	0.555901	60	0.629	0.8637		0.0022287	0.825821	0.87657	817	0.908	0.97008
REACTOME_INTERFERON_SIGNALING	-0.0583799	0.0147909	0.0715268	148	0.261	0.616491		-0.0271779	2.03118e-05	0.000137131	2078	0.195	0.652212
REACTOME_INTRINSIC_PATHWAY	-0.0403211	0.576765	0.769222	16	0.69	0.895516		-0.00316318	0.887123	0.924666	168	0.937	0.985146
REACTOME_INTRINSIC_PATHWAY_FOR_APOPTOSIS	-0.0193934	0.732364	0.865128	26	0.763	0.920941		-0.0366027	0.00113372	0.0039996	662	0.237	0.694295
REACTOME_INWARDLY_RECTIFYING_K_CHANNELS	0.0255136	0.659072	0.824103	25	0.759	0.920941		-0.0356262	0.00386601	0.0112022	550	0.166	0.629408
REACTOME_ION_CHANNEL_TRANSPORT	-0.014703	0.711715	0.859424	53	0.79	0.933806		0.00812691	0.316124	0.428278	1279	0.755	0.924527
REACTOME_ION_TRANSPORT_BY_P_TYPE_ATPASES	-0.00480709	0.925104	0.968683	32	0.952	0.989495		0.0110435	0.274351	0.385285	821	0.745	0.924527
REACTOME_IRON_UPTAKE_AND_TRANSPORT	0.00664958	0.890326	0.955969	36	0.937	0.986015		0.0150742	0.274624	0.385285	439	0.641	0.887128
REACTOME_JNK_C_JUN_KINASES_PHOSPHORYLATION_AND_ACTIVATION_MEDIATED_BY_ACTIVATED_HUMAN_TAK1	-0.0958305	0.184685	0.371637	16	0.317	0.66063		-0.053411	0.00173972	0.00574149	287	0.02	0.321538
REACTOME_KERATAN_SULFATE_BIOSYNTHESIS	-0.0488578	0.388932	0.59086	26	0.609	0.852741		-0.00745241	0.627092	0.720235	355	0.81	0.941552
REACTOME_KERATAN_SULFATE_DEGRADATION	-0.0985375	0.257942	0.457081	11	0.36	0.694121		-0.00157459	0.949865	0.968804	133	0.967	0.992889
REACTOME_KERATAN_SULFATE_KERATIN_METABOLISM	-0.0662167	0.209858	0.405203	30	0.5	0.783766		-0.00824734	0.560643	0.656965	416	0.784	0.937099
REACTOME_KINESINS	-0.125146	0.0378953	0.133611	23	0.211	0.563621		-0.0184653	0.108855	0.18705	631	0.463	0.814428
REACTOME_L1CAM_INTERACTIONS	-0.000611418	0.985149	0.992197	78	0.987	0.996078		-0.0198177	0.000511172	0.00201142	2608	0.232	0.687216
REACTOME_LAGGING_STRAND_SYNTHESIS	-0.13464	0.0423067	0.142171	19	0.108	0.436743		-0.0105692	0.366064	0.475996	612	0.733	0.91875
REACTOME_LATE_PHASE_OF_HIV_LIFE_CYCLE	-0.0349716	0.269398	0.470147	84	0.57	0.814654		-0.0250685	0.00134474	0.0045859	1376	0.146	0.601176
REACTOME_LATENT_INFECTION_OF_HOMO_SAPIENS_WITH_MYCOBACTERIUM_TUBERCULOSIS	0.0309775	0.550983	0.745477	31	0.647	0.871573		-0.00877467	0.543281	0.641708	401	0.816	0.942756
REACTOME_LIGAND_GATED_ION_CHANNEL_TRANSPORT	-0.029645	0.638385	0.812898	21	0.733	0.908945		0.00052824	0.968507	0.97881	467	0.989	0.996745
REACTOME_LIPID_DIGESTION_MOBILIZATION_AND_TRANSPORT	0.0906394	0.0424156	0.142171	42	0.24	0.593687		0.0067739	0.523188	0.621898	744	0.794	0.937099
REACTOME_LIPOPROTEIN_METABOLISM	0.0582159	0.295531	0.497922	27	0.514	0.794364		0.039918	0.00287925	0.00881858	466	0.282	0.721054
REACTOME_LOSS_OF_NLP_FROM_MITOTIC_CENTROSOMES	-0.153484	0.000207069	0.00332097	49	0.001	0.04828		-0.0100417	0.230677	0.336897	1197	0.618	0.877687
REACTOME_LYSOSOME_VESICLE_BIOGENESIS	0.0162048	0.802033	0.902998	20	0.789	0.933806		-0.00899969	0.510453	0.611073	447	0.753	0.924527
REACTOME_M_G1_TRANSITION	-0.121801	0.000641287	0.00788366	66	0.017	0.23317		-0.0240125	0.000317526	0.00132802	1898	0.184	0.647682
REACTOME_MAP_KINASE_ACTIVATION_IN_TLR_CASCADE	-0.0748511	0.079521	0.217609	46	0.129	0.46066		-0.0527385	3.52738e-11	2.03975e-09	1326	0.002	0.16625
REACTOME_MAPK_TARGETS_NUCLEAR_EVENTS_MEDIATED_BY_MAP_KINASES	-0.0475562	0.392814	0.59533	27	0.52	0.799638		-0.0497758	1.79563e-07	2.51388e-06	922	0.035	0.372803
REACTOME_MEIOSIS	-0.104553	0.00192798	0.0173245	74	0.066	0.386709		-0.020967	0.020611	0.0464621	1023	0.211	0.655764
REACTOME_MEIOTIC_RECOMBINATION	-0.0638406	0.126633	0.296023	48	0.375	0.70006		-0.00823141	0.505241	0.606471	548	0.697	0.914613
REACTOME_MEIOTIC_SYNAPSIS	-0.101228	0.0144043	0.0709292	49	0.059	0.367614		-0.0343046	0.00445506	0.0126069	575	0.069	0.478276
REACTOME_MEMBRANE_TRAFFICKING	0.0795758	0.00333781	0.0248227	115	0.029	0.265174		-0.0128001	0.0279639	0.0598904	2499	0.536	0.851833
REACTOME_METABOLISM_OF_AMINO_ACIDS_AND_DERIVATIVES	0.0495113	0.020786	0.0901912	186	0.238	0.593687		-0.0151375	0.00115989	0.00408108	3943	0.273	0.717569
REACTOME_METABOLISM_OF_CARBOHYDRATES	0.0387941	0.0459423	0.149637	227	0.216	0.566765		0.00581546	0.119254	0.202049	6244	0.646	0.88942
REACTOME_METABOLISM_OF_LIPIDS_AND_LIPOPROTEINS	0.0359952	0.00933734	0.0537746	461	0.349	0.690278		-0.0082769	0.00924773	0.0234276	8759	0.372	0.786582
REACTOME_METABOLISM_OF_MRNA	-0.0346723	0.161889	0.346475	138	0.418	0.725236		-0.0281275	8.90721e-09	1.88041e-07	3569	0.239	0.695558
REACTOME_METABOLISM_OF_NON_CODING_RNA	-0.0242641	0.591405	0.778908	41	0.782	0.930198		-0.0267775	0.0147013	0.0346211	695	0.188	0.649455
REACTOME_METABOLISM_OF_NUCLEOTIDES	0.0712901	0.0441265	0.146741	67	0.274	0.621582		-0.012057	0.124275	0.209222	1367	0.5	0.833955
REACTOME_METABOLISM_OF_POLYAMINES	0.0623572	0.403279	0.605431	15	0.41	0.725236		0.00213975	0.912323	0.941469	221	0.94	0.985185
REACTOME_METABOLISM_OF_PORPHYRINS	-0.0247655	0.757281	0.878641	13	0.768	0.924766		-0.0105312	0.611602	0.707003	194	0.872	0.958608
REACTOME_METABOLISM_OF_PROTEINS	-0.0105462	0.499814	0.69974	357	0.705	0.901125		-0.00746378	0.0263427	0.0568763	7790	0.464	0.814428
REACTOME_METABOLISM_OF_RNA	-0.0266014	0.226653	0.424928	176	0.53	0.799638		-0.0291069	1.33466e-10	6.12102e-09	4176	0.203	0.652212
REACTOME_METABOLISM_OF_STEROID_HORMONES_AND_VITAMINS_A_AND_D	-0.108233	0.0268863	0.108143	35	0.205	0.560005		0.015464	0.232704	0.337877	498	0.494	0.831671
REACTOME_METABOLISM_OF_VITAMINS_AND_COFACTORS	-0.00613945	0.880836	0.950613	50	0.903	0.980958		0.034264	0.000284058	0.00121544	941	0.106	0.568468
REACTOME_METAL_ION_SLC_TRANSPORTERS	-0.0779253	0.206111	0.399913	22	0.296	0.646061		-0.00729189	0.635007	0.726816	354	0.713	0.914613
REACTOME_MHC_CLASS_II_ANTIGEN_PRESENTATION	0.00556686	0.86374	0.936951	80	0.917	0.983956		-0.0173177	0.0134347	0.0320217	1718	0.338	0.768092
REACTOME_MICRORNA_MIRNA_BIOGENESIS	-0.181892	0.036778	0.132005	11	NA	NA		-0.0457608	0.00245445	0.00766295	366	0.196	0.652212
REACTOME_MITOCHONDRIAL_FATTY_ACID_BETA_OXIDATION	0.260648	0.0007375	0.00881522	14	0.163	0.512346		0.00462116	0.795344	0.851697	263	0.91	0.97008
REACTOME_MITOCHONDRIAL_PROTEIN_IMPORT	0.0516981	0.230946	0.429045	45	0.294	0.642859		-0.0223967	0.0153857	0.0359001	982	0.193	0.651497
REACTOME_MITOCHONDRIAL_TRNA_AMINOACYLATION	-0.00271948	0.965613	0.983466	21	0.981	0.994179		0.0480758	0.00305682	0.00922764	317	0.083	0.512477
REACTOME_MITOTIC_G1_G1_S_PHASES	-0.120693	1.02008e-05	0.000331396	113	0.008	0.172429		-0.0268137	6.80095e-07	7.86544e-06	2917	0.119	0.579744
REACTOME_MITOTIC_G2_G2_M_PHASES	-0.149053	1.4827e-05	0.000417462	71	0.001	0.04828		-0.0116804	0.109773	0.188141	1579	0.501	0.833955
REACTOME_MITOTIC_M_M_G1_PHASES	-0.195582	2.03827e-16	3.2281e-14	150	0	0		-0.0178674	0.000313361	0.00132308	3472	0.198	0.652212
REACTOME_MITOTIC_PROMETAPHASE	-0.245781	3.53879e-14	4.07604e-12	80	0.002	0.0754375		-0.00703526	0.345631	0.458535	1513	0.654	0.892106
REACTOME_MRNA_3_END_PROCESSING	-0.087707	0.129347	0.299571	25	0.394	0.712981		-0.0391104	0.000973376	0.00345224	595	0.228	0.67991
REACTOME_MRNA_CAPPING	-0.0978585	0.104519	0.25664	23	0.22	0.568608		-0.016422	0.218201	0.322394	470	0.595	0.87128
REACTOME_MRNA_DECAY_BY_3_TO_5_EXORIBONUCLEASE	0.118128	0.175044	0.358289	11	0.242	0.593687		0.024598	0.306772	0.421494	144	0.573	0.867984
REACTOME_MRNA_PROCESSING	-0.0658127	0.0117704	0.0631911	124	0.255	0.611865		-0.03591	5.16254e-10	1.76056e-08	2539	0.153	0.615075
REACTOME_MRNA_SPLICING	-0.0894561	0.00756226	0.0469675	75	0.204	0.560005		-0.0358347	1.59161e-07	2.30092e-06	1805	0.288	0.726597
REACTOME_MRNA_SPLICING_MINOR_PATHWAY	-0.109588	0.0753946	0.210872	22	0.11	0.436743		-0.0183452	0.12632	0.21186	581	0.532	0.851833
REACTOME_MTORC1_MEDIATED_SIGNALLING	0.0573034	0.510618	0.710156	11	NA	NA		-0.0239471	0.268687	0.379759	178	0.501	0.833955
REACTOME_MUSCLE_CONTRACTION	0.128501	0.00555434	0.0378352	39	0.107	0.436743		-0.0122478	0.101741	0.177347	1503	0.489	0.826391
REACTOME_MYD88_MAL_CASCADE_INITIATED_ON_PLASMA_MEMBRANE	-0.126975	0.000165787	0.00283855	74	0	0		-0.0366198	5.05356e-08	8.29782e-07	1869	0.026	0.3458
REACTOME_MYOGENESIS	-0.0305095	0.590575	0.778908	26	0.675	0.889438		-0.0263342	0.000447261	0.00179715	1496	0.13	0.585728
REACTOME_N_GLYCAN_ANTENNAE_ELONGATION	0.1076	0.163513	0.347357	14	0.42	0.725236		0.0616633	2.1341e-05	0.000141918	397	0.001	0.147778
REACTOME_N_GLYCAN_ANTENNAE_ELONGATION_IN_THE_MEDIAL_TRANS_GOLGI	0.101383	0.136683	0.310354	18	0.384	0.704389		0.0525372	1.97324e-05	0.000134585	552	0.014	0.310333
REACTOME_N_GLYCAN_TRIMMING_IN_THE_ER_AND_CALNEXIN_CALRETICULIN_CYCLE	0.015057	0.850956	0.928858	13	0.864	0.9585		-0.0557149	0.00066046	0.0024899	312	0.243	0.702424
REACTOME_NA_CL_DEPENDENT_NEUROTRANSMITTER_TRANSPORTERS	0.224107	0.00138715	0.0138388	17	0.016	0.23317		0.0318529	0.0650935	0.122108	280	0.464	0.814428
REACTOME_NCAM_SIGNALING_FOR_NEURITE_OUT_GROWTH	0.0653905	0.0780082	0.214513	61	0.217	0.566924		-0.00430884	0.515944	0.616537	1919	0.726	0.917852
REACTOME_NCAM1_INTERACTIONS	0.0259972	0.574792	0.768208	39	0.712	0.901767		0.0205934	0.0112994	0.0277785	1272	0.134	0.58625
REACTOME_NEF_MEDIATES_DOWN_MODULATION_OF_CELL_SURFACE_RECEPTORS_BY_RECRUITING_THEM_TO_CLATHRIN_ADAPTERS	-0.062825	0.39976	0.60154	15	0.488	0.773111		-0.0393266	0.00933664	0.0235699	365	0.351	0.772541
REACTOME_NEGATIVE_REGULATION_OF_FGFR_SIGNALING	-0.0730068	0.153377	0.334355	32	0.348	0.690278		-0.00580637	0.511523	0.611804	1073	0.875	0.958608
REACTOME_NEGATIVE_REGULATORS_OF_RIG_I_MDA5_SIGNALING	-0.0936155	0.120437	0.285221	23	0.264	0.618734		-0.041113	0.000130589	0.000650502	725	0.071	0.478276
REACTOME_NEP_NS2_INTERACTS_WITH_THE_CELLULAR_EXPORT_MACHINERY	-0.0118336	0.834704	0.918625	26	0.913	0.983956		-0.0506168	0.00103398	0.00365743	351	0.067	0.473989
REACTOME_NEPHRIN_INTERACTIONS	0.0586743	0.37623	0.576401	19	0.419	0.725236		0.0430299	4.50243e-06	3.93963e-05	953	0.141	0.591577
REACTOME_NETRIN1_SIGNALING	0.0128478	0.789913	0.897362	36	0.867	0.959183		-0.012108	0.041006	0.0830531	2413	0.455	0.814428
REACTOME_NEURONAL_SYSTEM	0.0475668	0.00895922	0.0522831	260	0.313	0.657983		-0.00106601	0.752269	0.818577	7708	0.937	0.985146
REACTOME_NEUROTRANSMITTER_RECEPTOR_BINDING_AND_DOWNSTREAM_TRANSMISSION_IN_THE_POSTSYNAPTIC_CELL	0.00469647	0.859036	0.934248	121	0.936	0.986015		-0.00287071	0.552214	0.649951	3664	0.849	0.955305
REACTOME_NEUROTRANSMITTER_RELEASE_CYCLE	0.0915371	0.0691065	0.199701	33	0.154	0.500777		0.00636889	0.523236	0.621898	842	0.847	0.954669
REACTOME_NFKB_ACTIVATION_THROUGH_FADD_RIP1_PATHWAY_MEDIATED_BY_CASPASE_8_AND10	-0.152431	0.0675946	0.197333	12	0.392	0.712981		-0.0107803	0.672796	0.7593	128	0.756	0.924527
REACTOME_NFKB_AND_MAP_KINASES_ACTIVATION_MEDIATED_BY_TLR4_SIGNALING_REPERTOIRE	-0.112861	0.00199592	0.0178087	63	0.002	0.0754375		-0.0387457	6.96101e-08	1.08919e-06	1632	0.028	0.354667
REACTOME_NGF_SIGNALLING_VIA_TRKA_FROM_THE_PLASMA_MEMBRANE	-0.0368079	0.163946	0.347357	121	0.518	0.799522		-0.0250148	6.59324e-08	1.04393e-06	3994	0.028	0.354667
REACTOME_NITRIC_OXIDE_STIMULATES_GUANYLATE_CYCLASE	-0.00310619	0.957163	0.981695	25	0.963	0.989495		-0.0433732	7.95635e-06	6.22467e-05	889	0.039	0.382734
REACTOME_NOD1_2_SIGNALING_PATHWAY	-0.0618999	0.249083	0.447137	29	0.48	0.767364		-0.0590542	5.71558e-05	0.000320846	388	0.009	0.278372
REACTOME_NONSENSE_MEDIATED_DECAY_ENHANCED_BY_THE_EXON_JUNCTION_COMPLEX	-0.0311536	0.420972	0.623827	56	0.571	0.814654		-0.0187706	0.00739176	0.0195463	1717	0.528	0.851833
REACTOME_NOTCH_HLH_TRANSCRIPTION_PATHWAY	-0.207878	0.0126838	0.0664063	12	0.023	0.255138		-0.0382699	0.000933333	0.00333692	626	0.38	0.795495
REACTOME_NOTCH1_INTRACELLULAR_DOMAIN_REGULATES_TRANSCRIPTION	-0.119864	0.0096922	0.0544506	39	0.017	0.23317		-0.019152	0.00330171	0.00979714	1988	0.314	0.744421
REACTOME_NRAGE_SIGNALS_DEATH_THROUGH_JNK	-0.0343577	0.436377	0.639125	43	0.55	0.809555		0.0151776	0.0412258	0.0833288	1523	0.441	0.809007
REACTOME_NRIF_SIGNALS_CELL_DEATH_FROM_THE_NUCLEUS	-0.164861	0.0480708	0.153802	12	0.105	0.436743		0.00496774	0.735623	0.809246	386	0.857	0.957332
REACTOME_NUCLEAR_EVENTS_KINASE_AND_TRANSCRIPTION_FACTOR_ACTIVATION	-0.044216	0.483335	0.68653	21	0.539	0.807658		-0.0556501	2.20107e-07	2.957e-06	726	0.039	0.382734
REACTOME_NUCLEAR_RECEPTOR_TRANSCRIPTION_PATHWAY	0.013278	0.753221	0.877949	47	0.759	0.920941		0.00948977	0.0953147	0.167621	2621	0.717	0.914613
REACTOME_NUCLEAR_SIGNALING_BY_ERBB4	-0.0656294	0.17353	0.357499	36	0.282	0.626754		0.0187983	0.0039191	0.0113313	1989	0.439	0.809007
REACTOME_NUCLEOTIDE_BINDING_DOMAIN_LEUCINE_RICH_REPEAT_CONTAINING_RECEPTOR_NLR_SIGNALING_PATHWAYS	-0.0680019	0.119185	0.283317	44	0.374	0.70006		-0.0438078	6.98036e-05	0.000383631	690	0.058	0.456221
REACTOME_NUCLEOTIDE_EXCISION_REPAIR	-0.0755823	0.0905908	0.232816	42	0.161	0.510045		0.000213711	0.98285	0.985815	848	0.988	0.996745
REACTOME_NUCLEOTIDE_LIKE_PURINERGIC_RECEPTORS	0.00587018	0.937288	0.973807	15	0.942	0.989258		0.00276678	0.905068	0.938185	155	0.955	0.989213
REACTOME_O_LINKED_GLYCOSYLATION_OF_MUCINS	-0.0628681	0.136596	0.310354	47	0.292	0.640807		0.0119912	0.148985	0.239601	1217	0.582	0.871225
REACTOME_OLFACTORY_SIGNALING_PATHWAY	0.287952	2.93312e-67	1.85813e-64	314	0.062	0.37417		-0.00871646	1.47152e-05	0.00010516	24723	0.679	0.905787
REACTOME_OPIOID_SIGNALLING	0.00469706	0.897647	0.960573	63	0.909	0.982241		-0.0244393	8.75648e-05	0.000463989	2179	0.155	0.615373
REACTOME_ORC1_REMOVAL_FROM_CHROMATIN	-0.107032	0.00714099	0.0456951	53	0.033	0.274697		-0.0291537	0.000229442	0.00102797	1343	0.11	0.571484
REACTOME_ORGANIC_CATION_ANION_ZWITTERION_TRANSPORT	-0.0282946	0.724019	0.861853	13	0.836	0.949975		-0.0352727	0.0881694	0.157827	195	0.535	0.851833
REACTOME_OTHER_SEMAPHORIN_INTERACTIONS	0.0834203	0.263529	0.462452	15	0.345	0.689429		0.0387016	2.7715e-05	0.000178937	984	0.204	0.652212
REACTOME_P130CAS_LINKAGE_TO_MAPK_SIGNALING_FOR_INTEGRINS	0.146015	0.05865	0.176507	14	0.078	0.411118		-0.00386254	0.811323	0.863939	319	0.901	0.97008
REACTOME_P2Y_RECEPTORS	-0.021785	0.802507	0.902998	11	0.825	0.947136		0.00944491	0.733938	0.80841	108	0.816	0.942756
REACTOME_P38MAPK_EVENTS	0.14169	0.103804	0.255379	11	NA	NA		-0.0244255	0.23178	0.337627	200	0.385	0.797586
REACTOME_P53_DEPENDENT_G1_DNA_DAMAGE_RESPONSE	-0.115641	0.0105169	0.0576834	41	0.02	0.25096		-0.0280746	0.000885451	0.00319961	1178	0.179	0.643432
REACTOME_P53_INDEPENDENT_G1_S_DNA_DAMAGE_CHECKPOINT	-0.103035	0.0326288	0.121234	36	0.059	0.367614		-0.0317878	0.00050331	0.00198636	1005	0.104	0.562276
REACTOME_P75_NTR_RECEPTOR_MEDIATED_SIGNALLING	-0.049436	0.142568	0.318577	74	0.314	0.657983		0.0169846	0.00415029	0.0119208	2413	0.311	0.743939
REACTOME_P75NTR_SIGNALS_VIA_NFKB	-0.191122	0.0282214	0.110918	11	0.096	0.436743		0.0104551	0.541311	0.639949	285	0.709	0.914613
REACTOME_PACKAGING_OF_TELOMERE_ENDS	-0.0951766	0.0815998	0.220912	28	0.212	0.563621		-0.0306098	0.182818	0.281422	158	0.365	0.781348
REACTOME_PASSIVE_TRANSPORT_BY_AQUAPORINS	0.0164453	0.857132	0.932977	10	0.827	0.947136		0.0349374	0.0775558	0.141494	213	0.305	0.737283
REACTOME_PD1_SIGNALING	-0.0403501	0.553634	0.747819	18	0.716	0.902746		-0.0372135	0.0939567	0.166174	169	0.428	0.809007
REACTOME_PEPTIDE_CHAIN_ELONGATION	-0.0311153	0.496525	0.696864	40	0.67	0.883814		-0.0188465	0.0244161	0.053235	1198	0.509	0.840957
REACTOME_PEPTIDE_HORMONE_BIOSYNTHESIS	-0.171467	0.0263919	0.106832	14	0.13	0.4615		0.000510071	0.974812	0.982197	320	0.99	0.996745
REACTOME_PEPTIDE_LIGAND_BINDING_RECEPTORS	-0.00584935	0.788656	0.896973	179	0.889	0.972822		0.00522759	0.432767	0.538965	1901	0.759	0.925059
REACTOME_PERK_REGULATED_GENE_EXPRESSION	0.0270937	0.626372	0.807338	27	0.633	0.8637		-0.0611471	5.30414e-05	0.000308057	365	0.016	0.317612
REACTOME_PEROXISOMAL_LIPID_METABOLISM	0.316624	9.64565e-07	4.88841e-05	20	0.006	0.157435		-0.00531044	0.797907	0.853754	194	0.842	0.954351
REACTOME_PHASE_II_CONJUGATION	0.160341	1.32208e-05	0.000417462	62	0.055	0.360788		0.0189752	0.0962789	0.168488	643	0.365	0.781348
REACTOME_PHASE1_FUNCTIONALIZATION_OF_COMPOUNDS	0.0816394	0.0221389	0.0948375	66	0.472	0.758594		-0.00528936	0.599273	0.697317	827	0.761	0.925059
REACTOME_PHOSPHOLIPASE_C_MEDIATED_CASCADE	-0.069512	0.0962696	0.24346	48	0.302	0.65025		-0.0181523	0.0109425	0.0270511	1656	0.448	0.813583
REACTOME_PHOSPHOLIPID_METABOLISM	0.0194876	0.354189	0.556076	193	0.633	0.8637		-0.0130306	0.00933936	0.0235699	3394	0.306	0.737283
REACTOME_PHOSPHORYLATION_OF_CD3_AND_TCR_ZETA_CHAINS	0.00713421	0.921337	0.967554	16	0.972	0.990882		-0.00644147	0.739724	0.812413	222	0.873	0.958608
REACTOME_PHOSPHORYLATION_OF_THE_APC_C	-0.148747	0.0395012	0.136566	16	0.116	0.448421		-0.0595996	0.00073333	0.00272438	268	0.067	0.473989
REACTOME_PI_3K_CASCADE	-0.07164	0.0717605	0.20402	53	0.42	0.725236		-0.0189794	0.00518862	0.0143351	1830	0.434	0.809007
REACTOME_PI_METABOLISM	-0.0185545	0.667241	0.829632	45	0.686	0.895516		-0.0113682	0.198902	0.299906	1072	0.48	0.826391
REACTOME_PI3K_AKT_ACTIVATION	-0.0698241	0.159334	0.342744	34	0.418	0.725236		-0.0238033	0.00415882	0.0119208	1218	0.249	0.705772
REACTOME_PI3K_CASCADE	-0.0221017	0.532599	0.732635	67	0.716	0.902746		-0.0244166	0.000491448	0.00194531	1718	0.302	0.736991
REACTOME_PI3K_EVENTS_IN_ERBB2_SIGNALING	-0.105616	0.019462	0.0859176	41	0.103	0.436743		-0.0109671	0.0932055	0.165284	1979	0.439	0.809007
REACTOME_PI3K_EVENTS_IN_ERBB4_SIGNALING	-0.0845635	0.0837794	0.224855	35	0.27	0.620743		-0.0069694	0.313489	0.427631	1764	0.672	0.901877
REACTOME_PIP3_ACTIVATES_AKT_SIGNALING	-0.0770116	0.174458	0.358289	26	0.418	0.725236		-0.0144423	0.132862	0.220607	908	0.594	0.87128
REACTOME_PKA_MEDIATED_PHOSPHORYLATION_OF_CREB	-0.0391166	0.600082	0.785437	15	0.602	0.848848		-0.00700307	0.65079	0.741403	349	0.812	0.941552
REACTOME_PKB_MEDIATED_EVENTS	0.0241946	0.657986	0.824103	28	0.691	0.895851		-0.037861	0.0029946	0.00909319	514	0.241	0.698322
REACTOME_PLATELET_ACTIVATION_SIGNALING_AND_AGGREGATION	-0.0296877	0.172506	0.357123	180	0.397	0.714127		-0.0167231	0.000103389	0.000533232	4637	0.264	0.712211
REACTOME_PLATELET_ADHESION_TO_EXPOSED_COLLAGEN	-0.079647	0.36051	0.563213	11	0.375	0.70006		0.00867937	0.55987	0.656638	377	0.626	0.878249
REACTOME_PLATELET_AGGREGATION_PLUG_FORMATION	0.0338164	0.495508	0.696791	34	0.633	0.8637		-0.0176449	0.0728985	0.134473	866	0.512	0.844418
REACTOME_PLATELET_CALCIUM_HOMEOSTASIS	0.0692072	0.338087	0.540853	16	0.42	0.725236		-0.0282505	0.0266242	0.057391	515	0.126	0.583902
REACTOME_PLATELET_HOMEOSTASIS	0.0096023	0.78476	0.895758	68	0.866	0.959183		-0.03648	9.52585e-09	1.9196e-07	2092	0.007	0.266
REACTOME_PLATELET_SENSITIZATION_BY_LDL	-0.0291551	0.705771	0.857654	14	0.719	0.902746		-0.020355	0.145685	0.236872	427	0.663	0.898869
REACTOME_PLC_BETA_MEDIATED_EVENTS	-0.0189993	0.693591	0.847573	36	0.77	0.924766		-0.00941877	0.258937	0.370307	1207	0.719	0.914613
REACTOME_POL_SWITCHING	-0.110218	0.169001	0.351023	13	0.22	0.568608		-0.0236776	0.0796688	0.144753	458	0.513	0.844418
REACTOME_POST_CHAPERONIN_TUBULIN_FOLDING_PATHWAY	-0.0302996	0.665537	0.828325	17	0.72	0.902746		-0.00703149	0.687622	0.771111	273	0.872	0.958608
REACTOME_POST_NMDA_RECEPTOR_ACTIVATION_EVENTS	-0.0259783	0.63455	0.811914	28	0.71	0.901125		-0.0178838	0.0686258	0.127832	869	0.421	0.809007
REACTOME_POST_TRANSLATIONAL_MODIFICATION_SYNTHESIS_OF_GPI_ANCHORED_PROTEINS	-0.124181	0.0285389	0.110918	26	0.058	0.367614		-0.0100465	0.311388	0.425639	851	0.52	0.849631
REACTOME_POST_TRANSLATIONAL_PROTEIN_MODIFICATION	-0.0400581	0.0718176	0.20402	172	0.368	0.70006		0.00160923	0.729257	0.804239	3961	0.833	0.951796
REACTOME_POTASSIUM_CHANNELS	0.0463057	0.126095	0.29531	92	0.465	0.753362		-0.00904372	0.10746	0.185132	2689	0.503	0.836237
REACTOME_PPARA_ACTIVATES_GENE_EXPRESSION	-0.000660851	0.981851	0.991257	100	0.978	0.991971		-0.0173036	0.00187025	0.00611164	2743	0.258	0.708429
REACTOME_PRE_NOTCH_EXPRESSION_AND_PROCESSING	-0.0973379	0.0381221	0.133611	38	0.161	0.510045		-0.0259019	0.00260174	0.00804725	1135	0.333	0.763603
REACTOME_PRE_NOTCH_PROCESSING_IN_GOLGI	0.0340951	0.636971	0.811914	16	0.66	0.881217		-0.0220169	0.153525	0.245475	351	0.381	0.795495
REACTOME_PRE_NOTCH_TRANSCRIPTION_AND_TRANSLATION	-0.221923	0.000231974	0.00367388	23	0.011	0.19242		-0.0306648	0.00203925	0.00661512	848	0.366	0.781348
REACTOME_PREFOLDIN_MEDIATED_TRANSFER_OF_SUBSTRATE_TO_CCT_TRIC	0.0179919	0.75104	0.877949	26	0.822	0.947136		-0.00623272	0.62779	0.720415	506	0.853	0.956883
REACTOME_PRESYNAPTIC_NICOTINIC_ACETYLCHOLINE_RECEPTORS	0.197321	0.0179845	0.0813797	12	0.156	0.500777		-0.0400545	0.138633	0.227071	114	0.418	0.809007
REACTOME_PROCESSING_OF_CAPPED_INTRON_CONTAINING_PRE_MRNA	-0.0783407	0.00596904	0.0400147	104	0.208	0.561647		-0.0365824	3.79333e-09	9.34283e-08	2195	0.204	0.652212
REACTOME_PROCESSING_OF_CAPPED_INTRONLESS_PRE_MRNA	-0.074424	0.302934	0.503332	16	0.551	0.809555		-0.0361202	0.0309439	0.0654298	298	0.36	0.781077
REACTOME_PROCESSING_OF_INTRONLESS_PRE_MRNAS	-0.104665	0.229513	0.427225	11	NA	NA		-0.0238093	0.26353	0.375263	184	0.632	0.882484
REACTOME_PROCESSIVE_SYNTHESIS_ON_THE_LAGGING_STRAND	-0.142623	0.0559289	0.170752	15	0.098	0.436743		-0.0160421	0.190911	0.289524	556	0.644	0.887585
REACTOME_PROLACTIN_RECEPTOR_SIGNALING	-0.0742241	0.373481	0.574624	12	0.633	0.8637		-0.00151005	0.916275	0.943224	405	0.97	0.993149
REACTOME_PROLONGED_ERK_ACTIVATION_EVENTS	0.0265184	0.713572	0.859424	16	0.701	0.898203		-0.0211166	0.117641	0.20008	459	0.342	0.770949
REACTOME_PROSTACYCLIN_SIGNALLING_THROUGH_PROSTACYCLIN_RECEPTOR	0.00209643	0.979128	0.990085	13	NA	NA		-0.0568344	0.00120339	0.00421186	271	0.059	0.456221
REACTOME_PROTEIN_FOLDING	0.00837595	0.837948	0.92	50	0.872	0.961191		-0.00580745	0.519567	0.619752	1032	0.761	0.925059
REACTOME_PROTEOLYTIC_CLEAVAGE_OF_SNARE_COMPLEX_PROTEINS	0.16822	0.0293794	0.112458	14	0.041	0.303601		0.0112753	0.423553	0.530942	421	0.824	0.947208
REACTOME_PTM_GAMMA_CARBOXYLATION_HYPUSINE_FORMATION_AND_ARYLSULFATASE_ACTIVATION	-0.0308874	0.585983	0.776328	26	0.687	0.895516		-0.00532482	0.743646	0.813925	315	0.877	0.960008
REACTOME_PURINE_METABOLISM	0.138591	0.00672312	0.044069	32	0.167	0.512898		-0.02562	0.0324618	0.0685304	583	0.246	0.705129
REACTOME_PURINE_RIBONUCLEOSIDE_MONOPHOSPHATE_BIOSYNTHESIS	0.142423	0.102027	0.252972	11	0.204	0.560005		0.000410545	0.988322	0.98981	106	0.992	0.996747
REACTOME_PURINE_SALVAGE	0.166281	0.0379817	0.133611	13	0.206	0.560005		-0.0656873	0.000102548	0.000533232	292	0.053	0.429817
REACTOME_PYRIMIDINE_CATABOLISM	0.078022	0.370393	0.573001	11	0.509	0.793751		-0.0316401	0.0199838	0.0452785	452	0.481	0.826391
REACTOME_PYRIMIDINE_METABOLISM	0.015753	0.793846	0.897792	23	0.853	0.95774		-0.0104003	0.358297	0.47042	653	0.799	0.937099
REACTOME_PYRUVATE_METABOLISM	0.0693668	0.308546	0.509684	18	0.41	0.725236		-0.000356589	0.982417	0.985815	319	0.995	0.997
REACTOME_PYRUVATE_METABOLISM_AND_CITRIC_ACID_TCA_CYCLE	0.154921	0.000710457	0.00857285	40	0.046	0.322802		-0.0148186	0.176672	0.273739	696	0.591	0.87128
REACTOME_RAP1_SIGNALLING	0.112825	0.159143	0.342744	13	0.284	0.627817		-0.0683334	4.40037e-10	1.58175e-08	698	0.021	0.321538
REACTOME_RAS_ACTIVATION_UOPN_CA2_INFUX_THROUGH_NMDA_RECEPTOR	0.00813805	0.916072	0.967554	14	0.92	0.983956		-0.000460791	0.969899	0.978879	561	0.981	0.995479
REACTOME_RECRUITMENT_OF_MITOTIC_CENTROSOME_PROTEINS_AND_COMPLEXES	-0.158042	4.45712e-05	0.00100842	56	0	0		-0.00691965	0.39948	0.510873	1246	0.718	0.914613
REACTOME_RECYCLING_OF_BILE_ACIDS_AND_SALTS	0.0793988	0.362009	0.564164	11	0.682	0.895516		0.0117592	0.571707	0.667578	193	0.62	0.878168
REACTOME_RECYCLING_PATHWAY_OF_L1	-0.12126	0.0442707	0.146835	23	0.103	0.436743		-0.0432969	0.000528072	0.00205964	536	0.045	0.409874
REACTOME_REGULATED_PROTEOLYSIS_OF_P75NTR	-0.194105	0.0335984	0.124109	10	NA	NA		0.00212233	0.90809	0.93916	247	0.951	0.989213
REACTOME_REGULATION_OF_AMPK_ACTIVITY_VIA_LKB1	0.0895407	0.246252	0.444446	14	0.358	0.694121		-0.0550163	0.00138695	0.00470832	282	0.151	0.612287
REACTOME_REGULATION_OF_APOPTOSIS	-0.0142134	0.744661	0.874679	44	0.738	0.908945		-0.0131466	0.0742229	0.136349	1553	0.392	0.804138
REACTOME_REGULATION_OF_BETA_CELL_DEVELOPMENT	0.0102637	0.848438	0.928858	29	0.894	0.974759		0.0187309	0.0227273	0.0502116	1243	0.45	0.814286
REACTOME_REGULATION_OF_COMPLEMENT_CASCADE	-0.136866	0.100782	0.251857	12	0.378	0.700244		0.00737367	0.786991	0.845475	112	0.875	0.958608
REACTOME_REGULATION_OF_GENE_EXPRESSION_IN_BETA_CELLS	0.0120363	0.85596	0.932786	19	0.871	0.960966		0.0159342	0.147153	0.237516	693	0.568	0.867856
REACTOME_REGULATION_OF_GLUCOKINASE_BY_GLUCOKINASE_REGULATORY_PROTEIN	0.0248203	0.655604	0.823857	27	0.79	0.933806		-0.0526822	0.000762347	0.00282429	341	0.058	0.456221
REACTOME_REGULATION_OF_HYPOXIA_INDUCIBLE_FACTOR_HIF_BY_OXYGEN	-0.197157	0.00635247	0.0419197	16	0.021	0.25096		-0.0182644	0.172677	0.269754	466	0.591	0.87128
REACTOME_REGULATION_OF_IFNA_SIGNALING	-0.0656705	0.265822	0.465188	24	0.607	0.852741		-0.0506	0.020845	0.0468307	174	0.213	0.655764
REACTOME_REGULATION_OF_IFNG_SIGNALING	-0.17609	0.0279878	0.110918	13	0.125	0.454443		-0.0464898	0.0215281	0.0481217	204	0.146	0.601176
REACTOME_REGULATION_OF_INSULIN_LIKE_GROWTH_FACTOR_IGF_ACTIVITY_BY_INSULIN_LIKE_GROWTH_FACTOR_BINDING_PROTEINS_IGFBPS	0.0122267	0.865608	0.938174	16	0.937	0.986015		-0.0356912	0.00920852	0.0233728	445	0.157	0.617781
REACTOME_REGULATION_OF_INSULIN_SECRETION	-0.0175634	0.592857	0.779993	78	0.699	0.897875		-0.0140989	0.021648	0.0483085	2245	0.507	0.840348
REACTOME_REGULATION_OF_INSULIN_SECRETION_BY_ACETYLCHOLINE	0.022527	0.805216	0.903357	10	NA	NA		-0.0376771	0.0144532	0.0342042	352	0.131	0.585728
REACTOME_REGULATION_OF_INSULIN_SECRETION_BY_GLUCAGON_LIKE_PEPTIDE1	-0.0152276	0.758908	0.878919	34	0.806	0.939944		-0.0168328	0.0650407	0.122108	1008	0.457	0.814428
REACTOME_REGULATION_OF_KIT_SIGNALING	-0.163512	0.0236169	0.098107	16	0.108	0.436743		-0.000689423	0.95873	0.97411	471	0.979	0.994706
REACTOME_REGULATION_OF_MITOTIC_CELL_CYCLE	-0.135589	0.000204603	0.00332097	63	0.006	0.157435		-0.0267831	0.000109245	0.000558828	1760	0.084	0.512477
REACTOME_REGULATION_OF_MRNA_STABILITY_BY_PROTEINS_THAT_BIND_AU_RICH_ELEMENTS	-0.0578479	0.102396	0.253391	67	0.2	0.556221		-0.0364673	3.5722e-07	4.61265e-06	1642	0.091	0.526217
REACTOME_REGULATION_OF_ORNITHINE_DECARBOXYLASE_ODC	-0.0802092	0.0875147	0.229568	38	0.13	0.4615		-0.0296445	0.000844979	0.00307896	1064	0.115	0.572846
REACTOME_REGULATION_OF_PYRUVATE_DEHYDROGENASE_PDH_COMPLEX	0.0217412	0.794337	0.897792	12	0.825	0.947136		-0.00181585	0.915955	0.943224	282	0.961	0.991567
REACTOME_REGULATION_OF_RHEB_GTPASE_ACTIVITY_BY_AMPK	0.0408775	0.654525	0.823518	10	NA	NA		-0.0532065	0.00901993	0.0230702	201	0.239	0.695558
REACTOME_REGULATION_OF_SIGNALING_BY_CBL	-0.0948427	0.163845	0.347357	18	0.268	0.620743		-0.00052841	0.970047	0.978879	422	0.984	0.995479
REACTOME_REGULATION_OF_WATER_BALANCE_BY_RENAL_AQUAPORINS	-0.0364709	0.462293	0.665597	34	0.51	0.794284		-0.0197585	0.0435244	0.0867879	875	0.418	0.809007
REACTOME_REGULATORY_RNA_PATHWAYS	-0.193845	0.0120668	0.064238	14	0.06	0.367614		-0.0394038	0.00688452	0.0183457	393	0.261	0.708429
REACTOME_REMOVAL_OF_THE_FLAP_INTERMEDIATE_FROM_THE_C_STRAND	-0.0885565	0.332332	0.535706	10	NA	NA		0.00316839	0.8618	0.906799	252	0.924	0.981061
REACTOME_REPAIR_SYNTHESIS_FOR_GAP_FILLING_BY_DNA_POL_IN_TC_NER	-0.0136285	0.859916	0.934403	14	0.896	0.976058		0.0213791	0.218992	0.322904	276	0.454	0.814428
REACTOME_RESOLUTION_OF_AP_SITES_VIA_THE_MULTIPLE_NUCLEOTIDE_PATCH_REPLACEMENT_PATHWAY	-0.0912569	0.192932	0.381525	17	0.14	0.478697		-0.00829673	0.6098	0.705861	316	0.849	0.955305
REACTOME_RESOLUTION_OF_AP_SITES_VIA_THE_SINGLE_NUCLEOTIDE_REPLACEMENT_PATHWAY	-0.0629474	0.450393	0.653525	12	0.438	0.739393		0.00157674	0.933183	0.956189	236	0.969	0.992889
REACTOME_RESPIRATORY_ELECTRON_TRANSPORT	0.0480423	0.199062	0.389817	60	0.618	0.859362		-0.0308098	0.000802612	0.00295699	993	0.088	0.5225
REACTOME_RESPIRATORY_ELECTRON_TRANSPORT_ATP_SYNTHESIS_BY_CHEMIOSMOTIC_COUPLING_AND_HEAT_PRODUCTION_BY_UNCOUPLING_PROTEINS_	0.0703166	0.0370126	0.132098	74	0.474	0.760378		-0.0389524	4.48736e-06	3.93963e-05	1165	0.032	0.370087
REACTOME_RESPONSE_TO_ELEVATED_PLATELET_CYTOSOLIC_CA2_	-0.0157118	0.636773	0.811914	76	0.772	0.926247		0.00312264	0.670064	0.757167	1568	0.887	0.965393
REACTOME_RETROGRADE_NEUROTROPHIN_SIGNALLING	-0.0607734	0.485356	0.688239	11	NA	NA		-0.0245732	0.129433	0.215721	318	0.348	0.7714
REACTOME_REVERSIBLE_HYDRATION_OF_CARBON_DIOXIDE	-0.00607283	0.941953	0.975574	12	0.945	0.989258		-0.0135813	0.591833	0.689263	130	0.83	0.950818
REACTOME_RIG_I_MDA5_MEDIATED_INDUCTION_OF_IFN_ALPHA_BETA_PATHWAYS	-0.128154	0.000404432	0.00550984	64	0.039	0.296057		-0.0318597	0.000175344	0.000821155	1165	0.062	0.463258
REACTOME_RIP_MEDIATED_NFKB_ACTIVATION_VIA_DAI	-0.223467	0.00143167	0.0140614	17	0.008	0.172429		0.0185541	0.330061	0.443864	230	0.583	0.871225
REACTOME_RNA_POL_I_PROMOTER_OPENING	0.00791843	0.891086	0.955975	25	0.916	0.983956		-0.00288783	0.890683	0.927649	189	0.94	0.985185
REACTOME_RNA_POL_I_RNA_POL_III_AND_MITOCHONDRIAL_TRANSCRIPTION	-0.0724858	0.0254445	0.103327	80	0.125	0.454443		0.00750771	0.350337	0.464091	1301	0.65	0.889856
REACTOME_RNA_POL_I_TRANSCRIPTION	-0.00956193	0.819033	0.910925	48	0.847	0.952776		0.00888144	0.455779	0.558183	590	0.683	0.90839
REACTOME_RNA_POL_I_TRANSCRIPTION_INITIATION	-0.0258009	0.675496	0.833353	22	0.717	0.902746		0.0278916	0.0504592	0.0982587	411	0.296	0.73311
REACTOME_RNA_POL_I_TRANSCRIPTION_TERMINATION	0.000948258	0.98859	0.992741	19	0.995	0.998308		0.0112936	0.452298	0.554942	370	0.703	0.914613
REACTOME_RNA_POL_II_PRE_TRANSCRIPTION_EVENTS	-0.098277	0.0227725	0.095823	45	0.146	0.48546		-0.0238722	0.0172457	0.0396831	834	0.247	0.705772
REACTOME_RNA_POL_II_TRANSCRIPTION	-0.0779705	0.0199083	0.0875829	75	0.252	0.605904		-0.0340671	3.16351e-06	2.98402e-05	1576	0.117	0.579114
REACTOME_RNA_POL_II_TRANSCRIPTION_PRE_INITIATION_AND_PROMOTER_OPENING	-0.0624105	0.22228	0.419715	32	0.434	0.738841		-0.023665	0.0459742	0.0906049	595	0.201	0.652212
REACTOME_RNA_POL_III_CHAIN_ELONGATION	-0.0124044	0.872385	0.944711	14	0.885	0.969324		0.00563855	0.767726	0.829468	229	0.846	0.954351
REACTOME_RNA_POL_III_TRANSCRIPTION	-0.105819	0.0450795	0.148353	30	0.209	0.561833		0.0129281	0.223664	0.3287	742	0.554	0.863798
REACTOME_RNA_POL_III_TRANSCRIPTION_INITIATION_FROM_TYPE_2_PROMOTER	-0.0768516	0.234428	0.432974	20	0.401	0.719178		0.019775	0.209077	0.311044	337	0.572	0.867984
REACTOME_RNA_POL_III_TRANSCRIPTION_INITIATION_FROM_TYPE_3_PROMOTER	-0.115944	0.0544378	0.168226	23	0.146	0.48546		-0.00565487	0.714333	0.792142	350	0.842	0.954351
REACTOME_RNA_POL_III_TRANSCRIPTION_TERMINATION	0.016477	0.819591	0.910925	16	0.831	0.947136		0.0142246	0.262916	0.374789	518	0.731	0.91875
REACTOME_ROLE_OF_DCC_IN_REGULATING_APOPTOSIS	0.15502	0.0896955	0.232401	10	0.087	0.430365		0.0262029	0.0415193	0.0835996	506	0.398	0.806921
REACTOME_RORA_ACTIVATES_CIRCADIAN_EXPRESSION	0.0400757	0.515547	0.716226	22	0.57	0.814654		-0.00779465	0.352764	0.465452	1194	0.762	0.925059
REACTOME_S_PHASE	-0.108789	0.00032591	0.00469236	92	0.011	0.19242		-0.0179705	0.00244217	0.00764255	2409	0.304	0.737283
REACTOME_SCF_BETA_TRCP_MEDIATED_DEGRADATION_OF_EMI1	-0.0835599	0.0831361	0.223638	36	0.104	0.436743		-0.0165036	0.0452517	0.0894276	1237	0.417	0.809007
REACTOME_SCFSKP2_MEDIATED_DEGRADATION_OF_P27_P21	-0.114402	0.0135582	0.0689887	39	0.03	0.270224		-0.0245816	0.00295109	0.00900219	1229	0.261	0.708429
REACTOME_SEMA3A_PAK_DEPENDENT_AXON_REPULSION	0.0609666	0.42983	0.633311	14	0.46	0.753362		0.0716548	2.62784e-10	1.07448e-08	651	0.088	0.5225
REACTOME_SEMA3A_PLEXIN_REPULSION_SIGNALING_BY_INHIBITING_INTEGRIN_ADHESION	0.082902	0.300881	0.502139	13	0.366	0.70006		0.0743447	4.81584e-11	2.66878e-09	655	0.074	0.482451
REACTOME_SEMA4D_IN_SEMAPHORIN_SIGNALING	-0.0806948	0.180699	0.366312	23	0.26	0.616491		-0.0226973	0.0342049	0.0718681	729	0.425	0.809007
REACTOME_SEMA4D_INDUCED_CELL_MIGRATION_AND_GROWTH_CONE_COLLAPSE	-0.0186807	0.783911	0.895595	18	0.828	0.947136		-0.00221418	0.858149	0.903673	545	0.962	0.991829
REACTOME_SEMAPHORIN_INTERACTIONS	-0.00803622	0.832705	0.917424	58	0.89	0.973034		0.0108635	0.074585	0.136825	2280	0.667	0.900101
REACTOME_SEROTONIN_RECEPTORS	0.168555	0.043277	0.144675	12	0.087	0.430365		-0.0305828	0.118885	0.201937	217	0.345	0.771176
REACTOME_SHC_MEDIATED_CASCADE	-0.0498549	0.370344	0.573001	27	0.56	0.814361		-0.0232839	0.0158499	0.0368539	900	0.563	0.867856
REACTOME_SHC_MEDIATED_SIGNALLING	-0.0374348	0.640389	0.812991	13	0.595	0.840943		-0.0587564	0.000624484	0.00236628	283	0.176	0.639701
REACTOME_SHC_RELATED_EVENTS	-0.0634324	0.411411	0.613966	14	0.337	0.677932		-0.0521649	0.00176774	0.00581954	300	0.208	0.655764
REACTOME_SHC1_EVENTS_IN_EGFR_SIGNALING	-0.0405389	0.612933	0.796499	13	0.546	0.809555		-0.0491199	0.00350477	0.0102447	295	0.225	0.673986
REACTOME_SHC1_EVENTS_IN_ERBB4_SIGNALING	-0.0548619	0.420617	0.623827	18	0.408	0.725236		-0.00680994	0.447968	0.551664	1042	0.734	0.91875
REACTOME_SIGNAL_AMPLIFICATION	-0.0269634	0.641024	0.812991	25	0.687	0.895516		-0.0462431	0.00021107	0.000954842	537	0.071	0.478276
REACTOME_SIGNAL_ATTENUATION	-0.0537451	0.519302	0.719864	12	0.528	0.799638		-0.034557	0.0449869	0.0890366	281	0.411	0.808624
REACTOME_SIGNAL_REGULATORY_PROTEIN_SIRP_FAMILY_INTERACTIONS	0.17456	0.036346	0.131198	12	0.037	0.291889		0.0331591	0.0198974	0.0451597	412	0.253	0.708429
REACTOME_SIGNAL_TRANSDUCTION_BY_L1	-0.0679171	0.198388	0.389098	30	0.215	0.56537		-0.007426	0.418917	0.527613	994	0.76	0.925059
REACTOME_SIGNALING_BY_ACTIVATED_POINT_MUTANTS_OF_FGFR1	0.0327762	0.706701	0.857654	11	NA	NA		0.020887	0.134083	0.221529	430	0.568	0.867856
REACTOME_SIGNALING_BY_BMP	-0.0604853	0.349369	0.552391	20	0.514	0.794364		-0.0165421	0.0906551	0.160976	877	0.405	0.807571
REACTOME_SIGNALING_BY_CONSTITUTIVELY_ACTIVE_EGFR	-0.092929	0.22883	0.426993	14	0.282	0.626754		-0.0517174	0.000204082	0.0009289	431	0.1	0.554167
REACTOME_SIGNALING_BY_EGFR_IN_CANCER	-0.0570962	0.0579277	0.175456	93	0.247	0.598653		-0.029945	2.05621e-08	3.85178e-07	2982	0.114	0.572151
REACTOME_SIGNALING_BY_ERBB2	-0.0902696	0.00353199	0.0258672	88	0.08	0.418009		-0.0178389	0.000456813	0.00183001	3290	0.184	0.647682
REACTOME_SIGNALING_BY_ERBB4	-0.0697375	0.0315659	0.11903	80	0.128	0.45981		-0.00206186	0.680371	0.764213	3405	0.895	0.966488
REACTOME_SIGNALING_BY_FGFR	-0.0612296	0.0369048	0.132086	98	0.298	0.649253		-0.0199222	9.61113e-05	0.00050326	3266	0.348	0.7714
REACTOME_SIGNALING_BY_FGFR_IN_DISEASE	-0.0529317	0.0539959	0.167678	112	0.336	0.677932		-0.0185606	0.000115192	0.000582531	3689	0.438	0.809007
REACTOME_SIGNALING_BY_FGFR_MUTANTS	-0.0216852	0.627299	0.807711	42	0.75	0.918103		-0.0204837	0.00796406	0.020769	1412	0.532	0.851833
REACTOME_SIGNALING_BY_FGFR1_FUSION_MUTANTS	-0.00178076	0.979145	0.990085	18	0.984	0.994714		-0.021671	0.0786002	0.143203	551	0.601	0.87128
REACTOME_SIGNALING_BY_FGFR1_MUTANTS	0.0113534	0.832575	0.917424	29	0.859	0.958042		-0.00301789	0.74416	0.813925	981	0.93	0.981667
REACTOME_SIGNALING_BY_FGFR3_MUTANTS	-0.0212321	0.80742	0.90451	11	NA	NA		0.0132735	0.335517	0.449293	440	0.776	0.934009
REACTOME_SIGNALING_BY_GPCR	0.116205	4.78793e-29	1.51658e-26	865	0.047	0.326029		-0.0121089	4.79304e-12	4.24983e-10	35822	0.292	0.73
REACTOME_SIGNALING_BY_HIPPO	-0.0313416	0.636456	0.811914	19	0.634	0.8637		-0.0419409	0.000542259	0.00210878	569	0.14	0.591577
REACTOME_SIGNALING_BY_ILS	-0.120625	3.59954e-05	0.000860494	99	0.01	0.188594		-0.0265547	3.62748e-05	0.000223359	2044	0.153	0.615075
REACTOME_SIGNALING_BY_INSULIN_RECEPTOR	-0.0121223	0.67347	0.833353	102	0.776	0.926441		-0.0251102	3.44715e-05	0.000214239	2303	0.3	0.736991
REACTOME_SIGNALING_BY_NODAL	-0.0913727	0.220697	0.418597	15	0.358	0.694121		-0.0562236	3.22268e-05	0.000202876	457	0.02	0.321538
REACTOME_SIGNALING_BY_NOTCH	-0.0741999	0.0147709	0.0715268	91	0.184	0.538374		-0.0186068	0.000327957	0.00136307	3174	0.319	0.749594
REACTOME_SIGNALING_BY_NOTCH1	-0.0833214	0.0224978	0.0950159	63	0.109	0.436743		-0.0195785	0.00067125	0.00251482	2559	0.257	0.708429
REACTOME_SIGNALING_BY_NOTCH2	-0.114836	0.168538	0.351023	12	0.355	0.694121		-0.0188207	0.188479	0.287205	408	0.709	0.914613
REACTOME_SIGNALING_BY_NOTCH3	-0.11558	0.165794	0.348938	12	0.368	0.70006		0.00192756	0.901411	0.937354	345	0.971	0.993408
REACTOME_SIGNALING_BY_NOTCH4	-0.0797641	0.338871	0.541425	12	0.548	0.809555		0.00267604	0.863843	0.90823	343	0.958	0.990008
REACTOME_SIGNALING_BY_PDGF	0.0105298	0.702741	0.856127	111	0.837	0.949975		-0.0209598	6.31756e-05	0.000351352	3101	0.084	0.512477
REACTOME_SIGNALING_BY_RHO_GTPASES	-0.0306405	0.277688	0.479334	106	0.452	0.749229		-0.00598259	0.211189	0.313834	3734	0.661	0.897071
REACTOME_SIGNALING_BY_ROBO_RECEPTOR	0.145317	0.0090233	0.0522831	27	0.026	0.255138		-0.0477071	1.60704e-09	4.27472e-08	1345	0.063	0.4655
REACTOME_SIGNALING_BY_SCF_KIT	-0.0636413	0.0625772	0.186116	72	0.246	0.598633		-0.0288471	9.97106e-06	7.53495e-05	1981	0.105	0.565385
REACTOME_SIGNALING_BY_TGF_BETA_RECEPTOR_COMPLEX	-0.102667	0.0113528	0.0612084	51	0.156	0.500777		-0.0381563	1.11808e-06	1.28193e-05	1370	0.091	0.526217
REACTOME_SIGNALING_BY_THE_B_CELL_RECEPTOR_BCR	-0.075761	0.00844903	0.0509758	102	0.098	0.436743		-0.0233157	2.57258e-06	2.48489e-05	3471	0.136	0.587273
REACTOME_SIGNALING_BY_WNT	-0.0926835	0.0265794	0.107249	48	0.073	0.400505		-0.0153868	0.0423566	0.0849687	1465	0.418	0.809007
REACTOME_SIGNALLING_BY_NGF	-0.0426927	0.0413546	0.14085	195	0.318	0.66063		-0.0105371	0.00444794	0.0126069	6345	0.385	0.797586
REACTOME_SIGNALLING_TO_ERKS	0.0543832	0.287552	0.489698	32	0.318	0.66063		-0.00409806	0.680896	0.764213	844	0.837	0.953413
REACTOME_SIGNALLING_TO_P38_VIA_RIT_AND_RIN	0.00785563	0.921907	0.967554	13	0.907	0.980958		-0.00646443	0.656301	0.745415	396	0.788	0.937099
REACTOME_SIGNALLING_TO_RAS	0.0515225	0.382657	0.582724	24	0.397	0.714127		-0.02332	0.057943	0.110746	553	0.447	0.813583
REACTOME_SLC_MEDIATED_TRANSMEMBRANE_TRANSPORT	0.0266929	0.159107	0.342744	239	0.603	0.849266		-0.00898471	0.0445121	0.0883864	4292	0.586	0.87128
REACTOME_SMAD2_SMAD3_SMAD4_HETEROTRIMER_REGULATES_TRANSCRIPTION	-0.223498	0.000395491	0.00550646	21	0.009	0.188594		-0.0737753	2.15099e-10	9.22843e-09	620	0.035	0.372803
REACTOME_SMOOTH_MUSCLE_CONTRACTION	0.0374488	0.604208	0.789208	16	0.657	0.880132		-0.0227698	0.0577621	0.110697	581	0.404	0.807571
REACTOME_SOS_MEDIATED_SIGNALLING	0.010599	0.898873	0.961073	12	NA	NA		-0.0800728	3.26268e-06	3.05589e-05	282	0.001	0.147778
REACTOME_SPHINGOLIPID_DE_NOVO_BIOSYNTHESIS	-0.0448405	0.395796	0.598627	30	0.526	0.799638		-0.0301965	0.0104283	0.0260708	602	0.036	0.372803
REACTOME_SPHINGOLIPID_METABOLISM	-0.0254664	0.472111	0.675893	67	0.7	0.897875		-0.0171595	0.0415484	0.0835996	1185	0.233	0.68854
REACTOME_SRP_DEPENDENT_COTRANSLATIONAL_PROTEIN_TARGETING_TO_MEMBRANE	-0.0533825	0.153587	0.334355	60	0.348	0.690278		-0.0155912	0.0370464	0.0767473	1506	0.538	0.851833
REACTOME_STEROID_HORMONES	-0.156419	0.00358523	0.0261062	29	0.092	0.435081		0.00533485	0.697408	0.780708	444	0.821	0.944576
REACTOME_STRIATED_MUSCLE_CONTRACTION	0.138493	0.0128269	0.0666053	27	0.11	0.436743		-0.000536823	0.953242	0.971504	1001	0.978	0.994706
REACTOME_SULFUR_AMINO_ACID_METABOLISM	0.0899825	0.127337	0.296666	24	0.163	0.512346		-0.0246711	0.119837	0.202777	332	0.485	0.826391
REACTOME_SYNTHESIS_AND_INTERCONVERSION_OF_NUCLEOTIDE_DI_AND_TRIPHOSPHATES	-0.00452195	0.950091	0.979468	16	0.951	0.989495		0.0251813	0.24216	0.351225	180	0.449	0.813583
REACTOME_SYNTHESIS_OF_BILE_ACIDS_AND_BILE_SALTS	0.061349	0.354861	0.556076	19	0.668	0.88214		0.0205325	0.205868	0.307767	317	0.351	0.772541
REACTOME_SYNTHESIS_OF_BILE_ACIDS_AND_BILE_SALTS_VIA_24_HYDROXYCHOLESTEROL	0.000577138	0.994959	0.996532	10	0.999	0.999828		0.0391347	0.126737	0.212293	127	0.283	0.721054
REACTOME_SYNTHESIS_OF_BILE_ACIDS_AND_BILE_SALTS_VIA_7ALPHA_HYDROXYCHOLESTEROL	0.160614	0.0313399	0.11853	15	0.342	0.684567		0.014398	0.519461	0.619752	167	0.605	0.87133
REACTOME_SYNTHESIS_OF_DNA	-0.100577	0.00219882	0.0186974	78	0.022	0.255138		-0.0225574	0.000522103	0.00204258	1998	0.197	0.652212
REACTOME_SYNTHESIS_OF_GLYCOSYLPHOSPHATIDYLINOSITOL_GPI	-0.169792	0.0154182	0.0734392	17	0.025	0.255138		-0.0172432	0.135564	0.223144	627	0.395	0.804518
REACTOME_SYNTHESIS_OF_PA	0.171395	0.00207169	0.0181023	27	0.012	0.198411		-0.00134632	0.929283	0.952927	363	0.935	0.9846
REACTOME_SYNTHESIS_OF_PC	0.00545962	0.936122	0.973807	18	0.963	0.989495		-0.0269052	0.0650078	0.122108	393	0.27	0.716766
REACTOME_SYNTHESIS_OF_PE	0.0676514	0.437349	0.639125	11	0.548	0.809555		-0.0224058	0.317577	0.42881	166	0.458	0.814428
REACTOME_SYNTHESIS_OF_PIPS_AT_THE_EARLY_ENDOSOME_MEMBRANE	-0.0782588	0.348065	0.551938	12	0.399	0.716656		-0.00459985	0.754853	0.819555	385	0.873	0.958608
REACTOME_SYNTHESIS_OF_PIPS_AT_THE_GOLGI_MEMBRANE	-0.0241679	0.745995	0.875163	15	0.792	0.933806		-0.00315066	0.832603	0.88236	376	0.865	0.958608
REACTOME_SYNTHESIS_OF_PIPS_AT_THE_LATE_ENDOSOME_MEMBRANE	0.0256609	0.77878	0.891664	10	0.783	0.930198		-0.0108651	0.546607	0.645064	257	0.716	0.914613
REACTOME_SYNTHESIS_OF_PIPS_AT_THE_PLASMA_MEMBRANE	-0.0453942	0.389988	0.591755	30	0.411	0.725236		-0.00776711	0.477593	0.578506	700	0.686	0.91007
REACTOME_SYNTHESIS_OF_SUBSTRATES_IN_N_GLYCAN_BIOSYTHESIS	-0.00337496	0.96514	0.983466	14	0.957	0.989495		-0.0172317	0.324444	0.437194	273	0.714	0.914613
REACTOME_SYNTHESIS_OF_VERY_LONG_CHAIN_FATTY_ACYL_COAS	0.138453	0.0729904	0.206426	14	0.24	0.593687		0.0239932	0.204909	0.307248	233	0.475	0.822591
REACTOME_SYNTHESIS_SECRETION_AND_DEACYLATION_OF_GHRELIN	-0.242607	0.00168015	0.0154257	14	0.006	0.157435		-0.0313099	0.0829423	0.149882	256	0.306	0.737283
REACTOME_SYNTHESIS_SECRETION_AND_INACTIVATION_OF_GIP	-0.190617	0.0222803	0.0948375	12	NA	NA		-0.0056685	0.703367	0.782381	377	0.879	0.961406
REACTOME_SYNTHESIS_SECRETION_AND_INACTIVATION_OF_GLP1	-0.110029	0.116467	0.277897	17	0.093	0.435081		0.0127439	0.384547	0.495588	389	0.73	0.918543
REACTOME_TAK1_ACTIVATES_NFKB_BY_PHOSPHORYLATION_AND_ACTIVATION_OF_IKKS_COMPLEX	-0.181991	0.00314928	0.0241844	22	0.01	0.188594		-0.0224793	0.133609	0.221105	372	0.26	0.708429
REACTOME_TANDEM_PORE_DOMAIN_POTASSIUM_CHANNELS	-0.0997776	0.231554	0.429544	12	0.337	0.677932		-0.0200283	0.304906	0.419364	219	0.604	0.87128
REACTOME_TCA_CYCLE_AND_RESPIRATORY_ELECTRON_TRANSPORT	0.0925589	0.000838938	0.00984199	110	0.224	0.572814		-0.0312898	4.13867e-06	3.69425e-05	1827	0.061	0.460966
REACTOME_TCR_SIGNALING	-0.0248963	0.539273	0.738659	51	0.62	0.860161		-0.0338094	0.000406869	0.00165036	917	0.054	0.432651
REACTOME_TELOMERE_MAINTENANCE	-0.118502	0.00241509	0.0199994	55	0.024	0.255138		-0.0140091	0.147106	0.237516	898	0.636	0.884812
REACTOME_TERMINATION_OF_O_GLYCAN_BIOSYNTHESIS	0.0255054	0.724058	0.861853	16	0.783	0.930198		-0.0278681	0.04612	0.0906049	428	0.565	0.867856
REACTOME_TGF_BETA_RECEPTOR_SIGNALING_ACTIVATES_SMADS	-0.0736461	0.279654	0.48207	18	0.465	0.753362		-0.0485777	8.30064e-05	0.000448775	549	0.104	0.562276
REACTOME_TGF_BETA_RECEPTOR_SIGNALING_IN_EMT_EPITHELIAL_TO_MESENCHYMAL_TRANSITION	0.0236378	0.795818	0.898372	10	NA	NA		0.00751526	0.614144	0.709037	376	0.863	0.958608
REACTOME_THE_ACTIVATION_OF_ARYLSULFATASES	-0.0258897	0.756237	0.878641	12	NA	NA		-0.0225091	0.344705	0.458	147	0.597	0.87128
REACTOME_THE_NLRP3_INFLAMMASOME	-0.109794	0.20749	0.401629	11	0.322	0.665503		0.0183356	0.499721	0.601474	113	0.64	0.886667
REACTOME_THE_ROLE_OF_NEF_IN_HIV1_REPLICATION_AND_DISEASE_PATHOGENESIS	0.00287304	0.96282	0.983449	22	0.963	0.989495		-0.0221955	0.0393109	0.08056	722	0.42	0.809007
REACTOME_THROMBIN_SIGNALLING_THROUGH_PROTEINASE_ACTIVATED_RECEPTORS_PARS	-0.0419547	0.468142	0.671728	25	0.49	0.773111		-0.0534038	9.58067e-05	0.00050326	446	0.047	0.409874
REACTOME_THROMBOXANE_SIGNALLING_THROUGH_TP_RECEPTOR	-0.0131531	0.851148	0.928858	17	0.862	0.958042		-0.0754429	1.96963e-06	2.05047e-05	332	0.008	0.272821
REACTOME_TIE2_SIGNALING	-0.11228	0.120146	0.285065	16	0.348	0.690278		-0.0436856	0.000163737	0.000784278	623	0.141	0.591577
REACTOME_TIGHT_JUNCTION_INTERACTIONS	0.0259114	0.629471	0.809685	29	0.697	0.897875		-0.0111485	0.341959	0.455717	608	0.69	0.913134
REACTOME_TOLL_RECEPTOR_CASCADES	-0.129678	4.34382e-06	0.000171988	106	0	0		-0.0287838	2.41643e-06	2.38063e-05	2271	0.025	0.342784
REACTOME_TRAF3_DEPENDENT_IRF_ACTIVATION_PATHWAY	-0.206902	0.00737857	0.0465107	14	0.042	0.30911		-0.0247581	0.190839	0.289524	233	0.388	0.800062
REACTOME_TRAF6_MEDIATED_INDUCTION_OF_NFKB_AND_MAP_KINASES_UPON_TLR7_8_OR_9_ACTIVATION	-0.121118	0.000571064	0.00709351	68	0.003	0.1065		-0.0421504	1.25046e-09	3.46481e-08	1751	0.014	0.310333
REACTOME_TRAF6_MEDIATED_INDUCTION_OF_TAK1_COMPLEX	-0.206398	0.0238562	0.0987773	10	0.115	0.448421		-0.0304768	0.0739681	0.136069	287	0.335	0.76555
REACTOME_TRAF6_MEDIATED_IRF7_ACTIVATION	-0.113902	0.0310065	0.11762	30	0.322	0.665503		-0.0283882	0.0653565	0.122428	352	0.177	0.639701
REACTOME_TRAF6_MEDIATED_NFKB_ACTIVATION	-0.199121	0.00206481	0.0181023	20	0.005	0.147195		-0.00780713	0.626246	0.719885	325	0.773	0.931241
REACTOME_TRAFFICKING_AND_PROCESSING_OF_ENDOSOMAL_TLR	-0.0592075	0.477755	0.680895	12	0.641	0.868336		-0.009639	0.786234	0.845345	66	0.817	0.942756
REACTOME_TRAFFICKING_OF_AMPA_RECEPTORS	0.0344939	0.550849	0.745477	25	0.662	0.881681		-0.00395422	0.668941	0.75654	981	0.907	0.97008
REACTOME_TRAFFICKING_OF_GLUR2_CONTAINING_AMPA_RECEPTORS	0.026074	0.744892	0.874679	13	0.807	0.940202		-0.00777577	0.487302	0.588935	668	0.778	0.934238
REACTOME_TRANS_GOLGI_NETWORK_VESICLE_BUDDING	0.0507426	0.202172	0.395295	53	0.207	0.5602		-0.00172673	0.834192	0.88334	1235	0.938	0.985185
REACTOME_TRANSCRIPTION	-0.0761425	0.00183852	0.0167583	142	0.132	0.46586		-0.0145436	0.0106668	0.0265671	2615	0.419	0.809007
REACTOME_TRANSCRIPTION_COUPLED_NER_TC_NER	-0.0553415	0.24468	0.443327	37	0.363	0.696568		0.00785329	0.456804	0.558313	752	0.707	0.914613
REACTOME_TRANSCRIPTIONAL_ACTIVITY_OF_SMAD2_SMAD3_SMAD4_HETEROTRIMER	-0.184018	0.00049255	0.00624061	30	0.012	0.198411		-0.0623252	8.30108e-10	2.50919e-08	813	0.022	0.321538
REACTOME_TRANSCRIPTIONAL_REGULATION_OF_WHITE_ADIPOCYTE_DIFFERENTIATION	-0.0530558	0.1285	0.298733	69	0.264	0.618734		-0.0211542	0.000330007	0.00136732	2441	0.278	0.721054
REACTOME_TRANSFERRIN_ENDOCYTOSIS_AND_RECYCLING	0.0308704	0.59346	0.779993	25	0.751	0.918396		0.0213749	0.170149	0.266233	344	0.554	0.863798
REACTOME_TRANSLATION	0.00641399	0.831313	0.917424	93	0.904	0.980958		-0.0147982	0.0183481	0.0418575	2148	0.489	0.826391
REACTOME_TRANSLOCATION_OF_ZAP_70_TO_IMMUNOLOGICAL_SYNAPSE	0.0693619	0.369081	0.572369	14	0.739	0.909249		-0.0206356	0.417055	0.526264	129	0.68	0.906212
REACTOME_TRANSMEMBRANE_TRANSPORT_OF_SMALL_MOLECULES	0.0288574	0.0521324	0.164454	397	0.536	0.804667		-0.00435875	0.204884	0.307248	7422	0.806	0.939509
REACTOME_TRANSMISSION_ACROSS_CHEMICAL_SYNAPSES	0.0238986	0.28695	0.489698	169	0.626	0.8637		-0.00371488	0.365199	0.475996	5129	0.792	0.937099
REACTOME_TRANSPORT_OF_GLUCOSE_AND_OTHER_SUGARS_BILE_SALTS_AND_ORGANIC_ACIDS_METAL_IONS_AND_AMINE_COMPOUNDS	0.035757	0.24523	0.443327	89	0.567	0.814654		-0.0123081	0.101417	0.177014	1491	0.561	0.867593
REACTOME_TRANSPORT_OF_INORGANIC_CATIONS_ANIONS_AND_AMINO_ACIDS_OLIGOPEPTIDES	0.053498	0.0771818	0.213981	92	0.359	0.694121		0.00784299	0.223433	0.3287	2036	0.674	0.903649
REACTOME_TRANSPORT_OF_MATURE_MRNA_DERIVED_FROM_AN_INTRONLESS_TRANSCRIPT	-0.0514565	0.314284	0.516469	32	0.579	0.82218		-0.0380574	0.00905324	0.0230756	393	0.168	0.629408
REACTOME_TRANSPORT_OF_MATURE_TRANSCRIPT_TO_CYTOPLASM	-0.0592031	0.160973	0.345098	47	0.431	0.735809		-0.0386452	0.00011351	0.000578425	836	0.111	0.572151
REACTOME_TRANSPORT_OF_ORGANIC_ANIONS	-0.125891	0.148372	0.326366	11	0.307	0.651228		-0.0289739	0.277825	0.388546	117	0.438	0.809007
REACTOME_TRANSPORT_OF_RIBONUCLEOPROTEINS_INTO_THE_HOST_NUCLEUS	-0.0265202	0.633694	0.811914	27	0.803	0.939168		-0.0517063	0.000620625	0.00235838	366	0.072	0.478276
REACTOME_TRANSPORT_OF_VITAMINS_NUCLEOSIDES_AND_RELATED_MOLECULES	-0.0181442	0.726896	0.863956	31	0.812	0.941483		-0.0233653	0.115556	0.197037	379	0.508	0.840348
REACTOME_TRANSPORT_TO_THE_GOLGI_AND_SUBSEQUENT_MODIFICATION	0.0487078	0.33343	0.536112	33	0.592	0.837683		0.0313412	0.0015292	0.005123	857	0.037	0.372803
REACTOME_TRIF_MEDIATED_TLR3_SIGNALING	-0.121713	0.00064712	0.00788366	66	0	0		-0.042526	2.32089e-09	5.93613e-08	1663	0.007	0.266
REACTOME_TRIGLYCERIDE_BIOSYNTHESIS	0.165425	0.000425143	0.00573039	38	0.027	0.260712		0.0390863	0.000284212	0.00121544	722	0.08	0.499531
REACTOME_TRNA_AMINOACYLATION	0.133986	0.00270021	0.0217909	42	0.121	0.449375		0.00382775	0.713809	0.792142	769	0.894	0.966488
REACTOME_TRYPTOPHAN_CATABOLISM	-0.0301526	0.729216	0.86509	11	0.843	0.952716		-0.00757636	0.785123	0.844837	108	0.79	0.937099
REACTOME_UNBLOCKING_OF_NMDA_RECEPTOR_GLUTAMATE_BINDING_AND_ACTIVATION	0.0258942	0.728544	0.86509	15	0.829	0.947136		0.00943331	0.35996	0.472137	789	0.72	0.914613
REACTOME_UNFOLDED_PROTEIN_RESPONSE	0.0528445	0.109921	0.26629	77	0.217	0.566924		-0.0210301	0.00523394	0.0144123	1484	0.536	0.851833
REACTOME_UNWINDING_OF_DNA	-0.0267333	0.758909	0.878919	11	0.81	0.941483		0.0161704	0.620893	0.715587	78	0.764	0.925428
REACTOME_VEGF_LIGAND_RECEPTOR_INTERACTIONS	-0.097828	0.284205	0.488471	10	0.404	0.721343		0.0240441	0.0427754	0.085508	594	0.486	0.826391
REACTOME_VIF_MEDIATED_DEGRADATION_OF_APOBEC3G	-0.080281	0.105646	0.258218	34	0.132	0.46586		-0.0329217	0.000281827	0.00121407	1021	0.084	0.512477
REACTOME_VITAMIN_B5_PANTOTHENATE_METABOLISM	-0.0814638	0.349658	0.552391	11	0.277	0.623767		0.00625546	0.807155	0.861456	127	0.846	0.954351
REACTOME_VOLTAGE_GATED_POTASSIUM_CHANNELS	0.103798	0.0187034	0.0833517	43	0.207	0.5602		0.00910786	0.20676	0.30794	1619	0.553	0.863798
REACTOME_XENOBIOTICS	0.188294	0.0239639	0.0989	12	0.415	0.725236		0.0299137	0.422262	0.530821	60	0.779	0.934238
REACTOME_YAP1_AND_WWTR1_TAZ_STIMULATED_GENE_EXPRESSION	0.014618	0.8084	0.904808	23	0.838	0.949975		-0.023937	0.0168147	0.0387584	836	0.459	0.814428
REACTOME_ZINC_TRANSPORTERS	-0.0791563	0.288717	0.489698	15	0.397	0.714127		0.0153617	0.366124	0.475996	289	0.536	0.851833
SA_B_CELL_RECEPTOR_COMPLEXES	-0.0745979	0.215913	0.412075	23	0.192	0.546566		-0.0359142	0.000717916	0.00267459	743	0.185	0.647682
SA_CASPASE_CASCADE	-0.105711	0.110886	0.268116	19	0.283	0.626754		-0.0194042	0.266301	0.377993	274	0.533	0.851833
SA_G1_AND_S_PHASES	-0.172367	0.0387589	0.135282	12	NA	NA		-0.0380296	0.0148099	0.0347394	343	0.437	0.809007
SA_MMP_CYTOKINE_CONNECTION	-0.251134	0.000762729	0.00903157	15	0.018	0.238747		0.0140829	0.432793	0.538965	259	0.668	0.900101
SA_PROGRAMMED_CELL_DEATH	-0.0296814	0.721924	0.861853	12	0.715	0.902746		-0.056843	0.000399396	0.00162944	324	0.157	0.617781
SA_PTEN_PATHWAY	-0.0379184	0.599681	0.785437	16	0.598	0.844194		0.000686886	0.962666	0.97513	388	0.985	0.995479
SA_REG_CASCADE_OF_CYCLIN_EXPR	-0.219067	0.00862216	0.0513997	12	0.073	0.400505		-0.0386179	0.0308262	0.0652848	261	0.302	0.736991
SA_TRKA_RECEPTOR	-0.0958072	0.184792	0.371637	16	0.246	0.598633		0.0272938	0.0296449	0.0630844	531	0.456	0.814428
SIG_BCR_SIGNALING_PATHWAY	-0.0327211	0.448332	0.652165	45	0.446	0.746632		-0.0381737	4.88298e-06	4.17377e-05	1204	0.187	0.647682
SIG_CD40PATHWAYMAP	-0.0608757	0.226718	0.424928	33	0.33	0.673486		-0.0095134	0.379029	0.490378	716	0.67	0.900101
SIG_CHEMOTAXIS	-0.0405164	0.375935	0.576401	40	0.503	0.786426		-0.0135206	0.0949782	0.167621	1282	0.601	0.87128
SIG_IL4RECEPTOR_IN_B_LYPHOCYTES	-0.0736059	0.1943	0.383455	26	0.241	0.593687		-0.0459144	9.78538e-06	7.43689e-05	777	0.256	0.708429
SIG_INSULIN_RECEPTOR_PATHWAY_IN_CARDIAC_MYOCYTES	0.00302681	0.944706	0.976299	44	0.949	0.989495		-0.0444193	2.4281e-09	6.09315e-08	1519	0.048	0.409874
SIG_PIP3_SIGNALING_IN_B_LYMPHOCYTES	-0.00516575	0.914693	0.967554	36	0.922	0.983956		-0.0224945	0.0137275	0.0326028	1007	0.354	0.774016
SIG_PIP3_SIGNALING_IN_CARDIAC_MYOCTES	-0.0531917	0.15169	0.331937	61	0.197	0.554263		-0.0423984	6.53707e-14	7.90391e-12	2653	0.002	0.16625
SIG_REGULATION_OF_THE_ACTIN_CYTOSKELETON_BY_RHO_GTPASES	0.0161047	0.77229	0.888177	27	0.839	0.949975		-0.0135851	0.196539	0.296705	757	0.596	0.87128
ST_ADRENERGIC	-0.0447229	0.360454	0.563213	35	0.428	0.73276		-0.00786644	0.427714	0.535145	852	0.757	0.924527
ST_B_CELL_ANTIGEN_RECEPTOR	-0.079943	0.0845026	0.22496	39	0.14	0.478697		-0.00817445	0.407128	0.517173	862	0.755	0.924527
ST_DIFFERENTIATION_PATHWAY_IN_PC12_CELLS	-0.0767842	0.0819576	0.221408	43	0.143	0.4828		-0.0482687	3.21564e-10	1.22194e-08	1428	0.024	0.339574
ST_ERK1_ERK2_MAPK_PATHWAY	-0.0700359	0.192209	0.381481	29	0.103	0.436743		-0.0406451	7.42201e-06	5.93302e-05	1020	0.179	0.643432
ST_FAS_SIGNALING_PATHWAY	-0.088277	0.017351	0.0796511	61	0.119	0.448421		-0.0310198	5.68448e-05	0.000320846	1417	0.296	0.73311
ST_G_ALPHA_I_PATHWAY	-0.000137301	0.997792	0.997792	34	0.998	0.999656		0.00939248	0.279315	0.38981	1114	0.748	0.924527
ST_G_ALPHA_S_PATHWAY	-0.0552367	0.474434	0.676923	14	0.471	0.757996		-0.0509925	1.65265e-05	0.000116298	597	0.133	0.585728
ST_GA12_PATHWAY	0.0492994	0.423782	0.626524	22	0.393	0.712981		-0.00112152	0.919902	0.944764	673	0.969	0.992889
ST_GA13_PATHWAY	-0.0526086	0.275299	0.476509	36	0.221	0.568757		-0.0365029	6.85738e-05	0.000378436	998	0.135	0.586765
ST_GAQ_PATHWAY	-0.045046	0.409813	0.613027	28	0.449	0.749229		-0.011215	0.269591	0.380632	812	0.747	0.924527
ST_GRANULE_CELL_SURVIVAL_PATHWAY	0.0109028	0.850456	0.928858	25	0.869	0.959637		-0.0353236	0.000314925	0.0013251	872	0.189	0.649535
ST_INTEGRIN_SIGNALING_PATHWAY	-0.00173675	0.958101	0.981695	77	0.969	0.989495		-0.0121453	0.0387511	0.0795355	2454	0.498	0.833955
ST_INTERFERON_GAMMA_PATHWAY	-0.0859067	0.347003	0.551634	10	0.38	0.700244		-0.0603816	0.0159023	0.0369111	133	0.112	0.572151
ST_INTERLEUKIN_4_PATHWAY	-0.0126969	0.822837	0.910925	26	0.846	0.952776		-0.0229508	0.0617913	0.116902	554	0.551	0.862153
ST_JNK_MAPK_PATHWAY	-0.0515887	0.265595	0.465188	39	0.379	0.700244		-0.042574	1.23655e-07	1.82735e-06	1297	0.028	0.354667
ST_MYOCYTE_AD_PATHWAY	0.0186855	0.741779	0.874264	26	0.738	0.908945		-0.00844179	0.408567	0.517518	803	0.777	0.934238
ST_P38_MAPK_PATHWAY	-0.0744649	0.133394	0.304281	34	0.144	0.4828		-0.0549379	9.26746e-10	2.73905e-08	1042	0.014	0.310333
ST_PHOSPHOINOSITIDE_3_KINASE_PATHWAY	-0.0263501	0.600797	0.785562	33	0.664	0.881681		-0.0470886	1.72326e-06	1.86336e-05	865	0.142	0.593899
ST_STAT3_PATHWAY	-0.119092	0.171547	0.355728	11	0.19	0.543436		-0.0323577	0.103729	0.179401	211	0.393	0.804138
ST_T_CELL_SIGNAL_TRANSDUCTION	-0.0783911	0.0724532	0.205365	44	0.209	0.561833		-0.00653539	0.456467	0.558313	1090	0.799	0.937099
ST_TUMOR_NECROSIS_FACTOR_PATHWAY	-0.225631	2.65438e-05	0.000672621	29	0.004	0.130486		-0.0386326	0.0053187	0.0145853	435	0.161	0.622471
ST_WNT_BETA_CATENIN_PATHWAY	0.0134262	0.786693	0.896424	34	0.828	0.947136		-0.0110044	0.230762	0.336897	995	0.701	0.914613
ST_WNT_CA2_CYCLIC_GMP_PATHWAY	0.0635392	0.325576	0.528732	20	0.333	0.674381		0.0187614	0.110646	0.189393	605	0.579	0.870655
WNT_SIGNALING	-0.0170714	0.583295	0.77467	87	0.736	0.908945		-0.0204502	0.00017249	0.000810643	2867	0.352	0.772541

## Sheet: GO
	Genes							Noncoding Regions
Pathway	stat	pval	p.adju	num.genes	permPval	permPadj		stat	pval	p.adj	num.genes	permPval	permPadj
A.band	0.190184	0.0225302	0.129574	12	0.071	0.484292		0.0285009	0.0601658	0.180281	363	0.505	0.991234
acetylcholine.gated.cation.selective.channel.activity	0.240952	0.00123294	0.0182926	15	0.044	0.415806		-0.00263832	0.911497	0.954908	148	0.959	0.995934
acetylcholine.gated.channel.complex	0.23916	0.000640081	0.0107992	17	0.027	0.374158		-0.0244914	0.221316	0.417436	208	0.602	0.991234
acetylcholine.receptor.binding	-0.00331894	0.968243	0.992991	12	0.974	0.999241		-0.0193052	0.117567	0.278471	549	0.51	0.991234
acetylgalactosaminyltransferase.activity	-0.0219367	0.734137	0.88922	20	0.706	0.921614		0.0140776	0.419815	0.614497	274	0.586	0.991234
acetylglucosaminyltransferase.activity	0.0228435	0.730304	0.886767	19	0.728	0.927049		0.0383147	0.00152231	0.0124134	572	0.089	0.952057
acetyltransferase.activity	-0.109673	0.155351	0.402414	14	0.255	0.661265		-0.0368648	0.0137258	0.0638487	373	0.204	0.973919
acrosomal.membrane	-0.262617	7.4001e-05	0.00217051	19	0.011	0.279464		-0.030921	0.0241432	0.0959835	444	0.252	0.978302
acrosomal.vesicle	-0.119246	0.000208474	0.00458785	81	0.088	0.503308		-0.0124935	0.0791957	0.21734	1657	0.706	0.99426
acrosome.assembly	-0.123879	0.12196	0.353908	13	0.255	0.661265		-0.0182319	0.284107	0.486435	288	0.44	0.989697
acrosome.reaction	-0.0685546	0.327766	0.605165	17	0.543	0.855237		0.0233915	0.240512	0.439389	210	0.436	0.989697
actin.binding	0.0594681	0.0011739	0.0174847	252	0.037	0.402863		-0.00544275	0.108788	0.266575	7477	0.701	0.99426
actin.cortical.patch	0.0819056	0.306512	0.586057	13	0.214	0.633686		-0.0236019	0.080137	0.218886	459	0.521	0.991234
actin.cytoskeleton	0.018494	0.38245	0.656052	188	0.524	0.848668		-0.00694397	0.0810805	0.220846	5385	0.731	0.99426
actin.cytoskeleton.organization	0.020998	0.388117	0.660075	142	0.6	0.886847		-0.0153609	0.00047398	0.00502921	4398	0.471	0.991234
actin.cytoskeleton.reorganization	0.00255417	0.949208	0.982662	52	0.954	0.993974		-0.0118093	0.0483077	0.155523	2354	0.64	0.993185
actin.dependent.ATPase.activity	0.228063	0.0125081	0.0883213	10	0.08	0.494134		0.00418279	0.808875	0.895506	279	0.893	0.994939
actin.filament	0.0310913	0.421055	0.691166	56	0.542	0.854814		-0.00450667	0.516741	0.69689	1738	0.84	0.994939
actin.filament.based.movement	0.151374	0.0261849	0.141101	18	0.069	0.482862		-0.00544914	0.654055	0.795136	565	0.882	0.994939
actin.filament.binding	0.142541	3.08426e-11	4.05528e-09	183	0.002	0.13749		-0.00372158	0.373212	0.572708	4874	0.873	0.994939
actin.filament.bundle.assembly	0.0529903	0.271266	0.545824	36	0.301	0.700269		-0.0137537	0.134492	0.304276	991	0.386	0.984478
actin.filament.capping	0.338711	2.35027e-05	0.000861691	13	0.002	0.13749		-0.0801177	7.5851e-07	2.81784e-05	318	0.011	0.792811
actin.filament.organization	-0.0154624	0.634836	0.83643	79	0.754	0.938487		-0.0109985	0.0602167	0.180309	2459	0.633	0.991698
actin.filament.polymerization	0.0603822	0.277496	0.554266	27	0.458	0.807314		0.00423058	0.679784	0.813826	796	0.874	0.994939
actin.monomer.binding	0.0501482	0.426294	0.696279	21	0.437	0.791794		0.00830703	0.456679	0.647336	671	0.8	0.99426
actin.nucleation	0.356392	9.50951e-05	0.00262752	10	0	0		0.0363559	0.0465677	0.15167	250	0.199	0.971127
actin.polymerization.or.depolymerization	0.0732065	0.360736	0.638277	13	0.394	0.765723		0.00559281	0.760413	0.867079	248	0.84	0.994939
actinin.binding	0.00621012	0.940619	0.979137	12	0.942	0.98941		-0.0233661	0.196415	0.386991	255	0.581	0.991234
action.potential	0.00302779	0.966552	0.992317	16	0.971	0.998486		-0.0343962	0.00152435	0.0124171	710	0.205	0.974825
activating.transcription.factor.binding	-0.0518349	0.31023	0.588271	32	0.539	0.852383		-0.0266849	0.000266752	0.00319694	1566	0.501	0.991234
activation.of.adenylate.cyclase.activity	0.111654	0.0222692	0.128461	35	0.034	0.394715		0.014997	0.136827	0.307231	823	0.309	0.97849
activation.of.cysteine.type.endopeptidase.activity	0.0175537	0.826531	0.930957	13	0.839	0.962005		0.00532793	0.791673	0.884818	205	0.906	0.995797
activation.of.cysteine.type.endopeptidase.activity.involved.in.apoptotic.process	-0.0968137	0.00399639	0.042804	74	0.085	0.494212		-0.0322484	1.30459e-05	0.000297865	1533	0.156	0.955333
activation.of.GTPase.activity	0.0655811	0.0413951	0.185715	81	0.065	0.471822		-0.00426811	0.434876	0.629008	2824	0.854	0.994939
activation.of.innate.immune.response	-0.155439	0.0116082	0.084286	22	0.041	0.41188		0.0262886	0.097295	0.24802	332	0.44	0.989697
activation.of.JNKK.activity	-0.0675066	0.438156	0.707919	11	0.341	0.731221		-0.0568349	0.000268869	0.00321492	343	0.129	0.952057
activation.of.JUN.kinase.activity	-0.0271948	0.572344	0.799972	36	0.484	0.826951		-0.0282304	0.00186933	0.0144163	1016	0.285	0.978302
activation.of.MAPK.activity	-0.0324759	0.237504	0.508194	111	0.343	0.731928		-0.00993003	0.0352827	0.126023	3808	0.611	0.991234
activation.of.MAPKK.activity	-0.0175301	0.704854	0.87477	39	0.748	0.936603		-0.0190795	0.0360019	0.127796	1011	0.257	0.978302
activation.of.MAPKKK.activity	-0.133462	0.125323	0.35929	11	0.171	0.598927		-0.0408095	0.0174674	0.0759284	283	0.258	0.978302
activation.of.NF.kappaB.inducing.kinase.activity	-0.14076	0.0386819	0.176852	18	0.129	0.55118		-0.0951995	1.58337e-07	7.45902e-06	253	0	0.401026
activation.of.phospholipase.C.activity	-0.0682558	0.188443	0.447963	31	0.249	0.658846		-0.0425452	6.33298e-05	0.00107383	739	0.051	0.887495
activation.of.protein.kinase.A.activity	0.0231737	0.74079	0.889837	17	0.733	0.928431		-0.0065998	0.666885	0.804213	355	0.84	0.994939
activation.of.protein.kinase.activity	-0.0461122	0.128621	0.365647	91	0.204	0.628492		-0.0267041	3.32107e-06	9.72689e-05	2555	0.083	0.940415
activation.of.protein.kinase.B.activity	0.021354	0.685636	0.865385	30	0.779	0.943737		0.00628668	0.472186	0.660436	1095	0.802	0.99426
activation.of.transmembrane.receptor.protein.tyrosine.kinase.activity	-0.00360504	0.964101	0.990765	13	0.962	0.995952		0.0111033	0.206661	0.399132	1083	0.77	0.99426
activin.binding	-0.11584	0.148113	0.390024	13	0.383	0.759501		-0.0429207	0.000332598	0.00382083	584	0.194	0.971127
activin.receptor.signaling.pathway	-0.0410271	0.595051	0.813731	14	0.72	0.924659		-0.036603	0.00179401	0.0140432	608	0.236	0.978302
actomyosin	0.117577	0.142126	0.382176	13	0.374	0.755325		0.0248397	0.0828465	0.223824	407	0.59	0.991234
actomyosin.structure.organization	0.0332633	0.535286	0.779025	29	0.637	0.899445		0.0148641	0.0849183	0.227487	1125	0.536	0.991234
acute.inflammatory.response	-0.0676451	0.380821	0.655478	14	0.445	0.797548		0.0105405	0.59084	0.752972	217	0.79	0.99426
acute.phase.response	-0.101726	0.0464329	0.197379	32	0.216	0.634783		-0.0382789	0.00709462	0.0388923	413	0.157	0.955333
acyl.CoA.hydrolase.activity	0.084844	0.289485	0.566635	13	0.537	0.852296		-0.0215637	0.39634	0.592163	129	0.434	0.989697
acyl.CoA.ligase.activity	0.229526	0.00208445	0.0266962	15	0.055	0.454788		-0.00311876	0.884798	0.940251	180	0.931	0.995934
acyl.CoA.metabolic.process	0.237712	2.72383e-05	0.00097065	26	0.017	0.315354		-0.00665206	0.658276	0.798157	369	0.779	0.99426
Ada2.Gcn5.Ada3.transcription.activator.complex	-0.115396	0.185066	0.44521	11	NA	NA		-0.0725862	5.07498e-05	0.000901963	260	0.023	0.856986
adaptive.immune.response	-0.0383536	0.0904633	0.293844	164	0.626	0.892877		-0.020688	0.000694689	0.0067867	2262	0.26	0.978302
adenylate.cyclase.activating.adrenergic.receptor.signaling.pathway	0.193904	0.00343219	0.0380434	19	0.01	0.263609		0.0534214	0.000484928	0.00512104	356	0.033	0.857677
adenylate.cyclase.activating.G.protein.coupled.receptor.signaling.pathway	0.00367509	0.91126	0.969754	77	0.942	0.98941		0.0118247	0.0440241	0.146068	2443	0.375	0.980897
adenylate.cyclase.activity	-0.0094952	0.917185	0.971422	10	0.942	0.98941		0.00496191	0.813758	0.897544	188	0.91	0.995797
adenylate.cyclase.binding	0.134397	0.141086	0.380508	10	0.097	0.522399		-0.00687482	0.583237	0.746857	532	0.777	0.99426
adenylate.cyclase.inhibiting.dopamine.receptor.signaling.pathway	0.191649	0.0358422	0.169351	10	NA	NA		0.0651767	0.0020272	0.0154284	187	0.185	0.966137
adenylate.cyclase.inhibiting.G.protein.coupled.receptor.signaling.pathway	0.0888876	0.0192405	0.116528	58	0.171	0.598927		0.00964723	0.241867	0.440561	1233	0.685	0.994068
adenylate.cyclase.modulating.G.protein.coupled.receptor.signaling.pathway	0.061305	0.119239	0.348513	54	0.276	0.682891		-0.0168312	0.0384092	0.133109	1268	0.57	0.991234
adherens.junction	-0.00689269	0.855961	0.940571	58	0.849	0.963923		0.00253642	0.608812	0.763456	3444	0.824	0.994939
adherens.junction.organization	0.0553086	0.250851	0.52302	36	0.331	0.724398		0.0108308	0.0517128	0.163293	2721	0.609	0.991234
adipose.tissue.development	0.0237557	0.67502	0.859383	26	0.759	0.939638		-0.0326329	8.84451e-05	0.00139163	1209	0.244	0.978302
ADP.binding	0.127384	0.0175885	0.109762	29	0.011	0.279464		-0.0193738	0.102639	0.256351	593	0.589	0.991234
adrenal.gland.development	-0.0697356	0.29264	0.569885	19	0.237	0.652215		-0.058887	3.33665e-12	5.32502e-10	1171	0.04	0.879887
adrenergic.receptor.activity	0.185423	0.00812242	0.0688541	17	0.016	0.309923		0.0494248	0.00231715	0.0170222	317	0.04	0.879887
adult.behavior	0.0489663	0.361439	0.638425	29	0.524	0.848668		0.0238126	0.000107104	0.00162316	2227	0.407	0.985625
adult.feeding.behavior	0.106515	0.243441	0.513976	10	NA	NA		0.0372373	0.0558289	0.17148	220	0.551	0.991234
adult.heart.development	0.0538357	0.485506	0.746683	14	0.53	0.850037		0.00610776	0.592412	0.753707	642	0.801	0.99426
adult.locomotory.behavior	0.0736492	0.0807179	0.277027	47	0.225	0.639513		0.00633893	0.327001	0.528883	2010	0.738	0.99426
adult.walking.behavior	0.127431	0.0175469	0.109682	29	0.068	0.480661		0.00589773	0.441352	0.634621	1429	0.837	0.994939
aerobic.respiration	0.134439	0.0176574	0.110012	26	0.084	0.494134		-0.0134011	0.317809	0.519984	464	0.626	0.991544
aggresome	0.0202551	0.65364	0.850221	41	0.72	0.924659		-0.00204555	0.805886	0.893167	1209	0.946	0.995934
aging	0.0517154	0.0228547	0.12968	163	0.112	0.533722		-0.0167831	0.000359727	0.00403886	3830	0.328	0.980206
alcohol.dehydrogenase..NADP...activity	0.161488	0.0769902	0.271023	10	NA	NA		0.0736525	0.0802966	0.219193	47	0.221	0.97695
aldehyde.dehydrogenase..NAD..activity	0.247677	0.00198692	0.0259827	13	0.07	0.484063		-0.0148956	0.475951	0.664118	191	0.658	0.993993
alditol.NADP..1.oxidoreductase.activity	0.153453	0.0780013	0.271861	11	0.329	0.724089		0.0379943	0.312097	0.514606	59	0.427	0.989697
aldo.keto.reductase..NADP..activity	0.157506	0.0845609	0.284833	10	NA	NA		0.000991788	0.968167	0.984534	135	0.982	0.999685
alpha.actinin.binding	0.0827879	0.237283	0.508007	17	0.419	0.782223		0.0102849	0.329355	0.531207	752	0.701	0.99426
alpha.catenin.binding	0.20234	0.0267062	0.142507	10	NA	NA		0.0445655	8.58906e-05	0.00135964	649	0.049	0.887495
alpha.linolenic.acid.metabolic.process	0.310566	0.000105611	0.00289709	13	0.037	0.402863		-0.0139121	0.541012	0.716575	161	0.752	0.99426
alpha.tubulin.binding	-0.0431574	0.413307	0.685191	30	0.378	0.756432		-0.0053748	0.538973	0.715188	1094	0.843	0.994939
amelogenesis	0.0931918	0.307479	0.586435	10	NA	NA		-0.0146486	0.533055	0.710682	151	0.723	0.99426
amino.acid.binding	0.109379	0.108138	0.326469	18	0.157	0.576983		-0.00469549	0.724355	0.843127	471	0.856	0.994939
amino.acid.transmembrane.transport	0.0549986	0.260203	0.53283	35	0.421	0.783038		0.0206955	0.0577058	0.175309	703	0.538	0.991234
amino.acid.transmembrane.transporter.activity	-0.0163695	0.737542	0.889607	35	0.831	0.957753		0.00292819	0.80855	0.895463	572	0.91	0.995797
amino.acid.transport	-0.0189552	0.689928	0.867208	37	0.809	0.950978		-0.00899191	0.402051	0.597783	726	0.787	0.99426
aminoacyl.tRNA.editing.activity	0.130015	0.135381	0.373251	11	0.391	0.764128		0.0570154	0.00900729	0.0463096	175	0.188	0.967898
aminoacyl.tRNA.synthetase.multienzyme.complex	0.261069	0.00173857	0.0233385	12	0.049	0.43273		-0.0314226	0.0782551	0.215667	262	0.317	0.979216
aminopeptidase.activity	0.0293279	0.611751	0.824782	25	0.584	0.875378		0.0214925	0.0505142	0.160545	692	0.25	0.978302
AMP.binding	0.11548	0.149378	0.391836	13	0.188	0.613142		0.00439166	0.781783	0.879771	332	0.951	0.995934
AMPA.glutamate.receptor.complex	0.0364571	0.528066	0.774724	25	0.769	0.94102		-0.000577381	0.952751	0.976474	881	0.99	0.999685
amyloid.beta.binding	0.0325047	0.327414	0.605165	76	0.527	0.849109		0.00434827	0.431607	0.626714	2759	0.762	0.99426
amyloid.beta.clearance	-0.0766815	0.338392	0.616716	13	0.494	0.832275		-0.028986	0.0587024	0.177172	355	0.485	0.991234
amyloid.beta.metabolic.process	0.196621	0.0140978	0.0946393	13	0.028	0.379027		-0.0244567	0.273767	0.475745	167	0.526	0.991234
amyloid.precursor.protein.metabolic.process	-0.0242726	0.780421	0.90809	11	NA	NA		-0.0450541	0.0129188	0.060785	254	0.29	0.978302
anaphase.promoting.complex	-0.11791	0.0923408	0.297732	17	0.23	0.645327		-0.0262835	0.0968585	0.247285	333	0.299	0.978302
anaphase.promoting.complex.dependent.catabolic.process	-0.114245	0.00133368	0.0191725	66	0.008	0.252685		-0.0397279	3.05557e-08	1.74413e-06	1631	0.034	0.857677
anatomical.structure.development	-0.0603237	0.204213	0.467008	37	0.295	0.695541		-0.0224495	0.00212051	0.0159753	1572	0.278	0.978302
anatomical.structure.morphogenesis	-0.0618977	0.0316937	0.156135	101	0.249	0.658846		0.0247582	1.07723e-07	5.36554e-06	3904	0.192	0.971127
anchored.component.of.external.side.of.plasma.membrane	-0.170679	0.0180892	0.110891	16	0.069	0.482862		-0.000322927	0.974662	0.988091	809	0.995	0.999685
anchored.component.of.membrane	-0.0580225	0.0545471	0.217107	92	0.171	0.598927		0.0385872	2.85078e-15	8.10659e-13	3545	0.146	0.954615
anchored.component.of.plasma.membrane	-0.0472886	0.37004	0.644276	30	0.504	0.837055		0.0155021	0.021632	0.0885434	1844	0.462	0.991234
anchored.component.of.synaptic.vesicle.membrane	0.040474	0.627324	0.833471	12	NA	NA		-0.0842455	5.20911e-06	0.00014268	244	0.003	0.701702
androgen.biosynthetic.process	-0.201525	0.0273239	0.144302	10	0.172	0.599939		-0.0273765	0.333588	0.53611	104	0.549	0.991234
androgen.metabolic.process	0.109773	0.141008	0.380508	15	0.323	0.719008		-0.015784	0.249727	0.448729	444	0.637	0.99309
androgen.receptor.binding	-0.0808614	0.066598	0.246064	43	0.184	0.610024		-0.0100988	0.12847	0.295306	1904	0.729	0.99426
androgen.receptor.signaling.pathway	-0.0792637	0.115093	0.338879	33	0.22	0.635878		0.0110588	0.254281	0.453783	889	0.564	0.991234
angiogenesis	-0.0417183	0.0352764	0.1673	215	0.29	0.690251		-0.0155727	3.15174e-06	9.28309e-05	7723	0.481	0.991234
angiogenesis.involved.in.wound.healing	-0.0251674	0.772545	0.905572	11	0.771	0.94102		0.00971763	0.596225	0.756061	248	0.837	0.994939
angiotensin.maturation	0.0290486	0.738664	0.889607	11	0.773	0.94102		-0.0540191	0.00586453	0.0337583	217	0.158	0.955333
animal.organ.morphogenesis	-0.0129004	0.641924	0.841988	109	0.735	0.929286		1.23695e-06	0.999774	0.999838	4444	1	1
animal.organ.regeneration	0.018241	0.686144	0.865454	41	0.77	0.94102		-0.0309517	0.000607188	0.00613254	1027	0.174	0.962125
anion.anion.antiporter.activity	-0.00495136	0.938896	0.978145	20	0.948	0.99185		-0.00916187	0.471444	0.659987	516	0.731	0.99426
anion.transmembrane.transport	0.0842943	0.0801069	0.275763	36	0.173	0.599939		0.0106008	0.221859	0.417766	1112	0.635	0.992346
anion.transport	-0.0908652	0.296678	0.574814	11	0.363	0.748634		0.0251498	0.202705	0.394321	214	0.483	0.991234
ankyrin.binding	0.184198	0.0054418	0.0536165	19	0.089	0.506485		-0.0271036	0.0158546	0.0705649	662	0.416	0.985625
anoikis	-0.03921	0.652475	0.850078	11	0.727	0.927049		-0.0517599	0.0056976	0.0330039	238	0.136	0.952057
anterior.posterior.axis.specification	-0.0860711	0.233252	0.502861	16	0.278	0.684939		0.0118694	0.229582	0.427203	857	0.673	0.993993
anterior.posterior.pattern.specification	-0.0221261	0.465921	0.732119	91	0.761	0.940032		-0.00542172	0.285614	0.487831	3279	0.831	0.994939
anterograde.axonal.transport	0.154731	0.00538912	0.053235	27	0.004	0.171024		-0.00941058	0.436562	0.63023	571	0.667	0.993993
anterograde.synaptic.vesicle.transport	0.174842	0.0290464	0.149143	13	0.064	0.468443		0.0034257	0.818866	0.900638	373	0.921	0.995934
antibacterial.humoral.response	0.0941804	0.19212	0.453314	16	0.401	0.767835		-0.0627043	0.0057149	0.0330796	162	0.129	0.952057
antigen.binding	0.00462835	0.947322	0.981507	17	0.978	0.999241		-0.0535116	0.0214708	0.0880681	154	0.202	0.972086
antigen.processing.and.presentation	-0.000954097	0.989133	0.999237	17	0.986	1		-0.0717426	6.65028e-06	0.000173507	329	0.011	0.792811
antigen.processing.and.presentation.of.exogenous.peptide.antigen.via.MHC.class.I..TAP.dependent	0.0540913	0.131637	0.369069	65	0.256	0.662388		-0.0364887	2.80155e-06	8.46141e-05	1382	0.138	0.952057
antigen.processing.and.presentation.of.exogenous.peptide.antigen.via.MHC.class.II	0.0257862	0.411415	0.684288	85	0.674	0.910965		-0.0303383	7.40988e-06	0.000187423	1833	0.15	0.955333
antigen.processing.and.presentation.of.peptide.antigen.via.MHC.class.I	0.0926318	0.0957209	0.305205	27	0.446	0.797548		-0.0573065	4.81063e-05	0.000860849	420	0.221	0.97695
antimicrobial.humoral.immune.response.mediated.by.antimicrobial.peptide	-0.042915	0.298776	0.577705	49	0.581	0.873493		-0.00731898	0.606269	0.761793	414	0.849	0.994939
antimicrobial.humoral.response	0.0453134	0.28773	0.565524	46	0.628	0.893575		-0.0419505	0.0143861	0.0658317	284	0.347	0.980215
antioxidant.activity	0.171133	0.0326351	0.15885	13	0.107	0.530481		-0.0122322	0.522491	0.70186	228	0.736	0.99426
antiporter.activity	-0.0218789	0.728527	0.88603	21	0.816	0.951096		0.0175068	0.304536	0.506372	287	0.705	0.99426
aorta.development	0.0571144	0.376561	0.652234	20	0.459	0.808264		-0.0644323	4.26496e-17	1.90583e-14	1427	0.036	0.867951
aorta.morphogenesis	0.122462	0.112609	0.335978	14	0.13	0.55118		0.0133085	0.17372	0.358791	874	0.499	0.991234
aortic.valve.morphogenesis	0.0238415	0.662372	0.854503	28	0.745	0.93644		-0.0428037	1.18261e-10	1.41191e-08	1903	0.117	0.952057
apical.dendrite	0.113109	0.129321	0.366074	15	0.2	0.627064		-0.00336756	0.74944	0.860401	752	0.937	0.995934
apical.junction.complex	0.0398088	0.619188	0.82899	13	0.548	0.861178		0.0271996	0.00216708	0.0161166	1064	0.371	0.980796
apical.part.of.cell	-0.000279071	0.993746	0.999237	66	0.991	1		0.00477451	0.426524	0.620889	2335	0.83	0.994939
apical.plasma.membrane	0.0447925	0.00837047	0.069651	294	0.351	0.735568		0.00657623	0.0457255	0.149891	7967	0.665	0.993993
apical.protein.localization	-0.0391885	0.667817	0.854503	10	NA	NA		-0.0393172	0.0365058	0.128883	236	0.182	0.966137
apicolateral.plasma.membrane	0.0516177	0.47469	0.739376	16	0.485	0.82745		0.000582335	0.971915	0.986145	305	0.984	0.999685
apolipoprotein.binding	0.0988278	0.171095	0.424729	16	0.219	0.635878		-0.0179561	0.211613	0.404451	404	0.634	0.992346
apoptotic.cell.clearance	0.0393608	0.552528	0.790243	19	0.625	0.892877		0.0143528	0.235792	0.434164	570	0.626	0.991544
apoptotic.DNA.fragmentation	-0.0714545	0.337962	0.616284	15	0.277	0.684399		-0.0271721	0.105582	0.261364	296	0.527	0.991234
apoptotic.mitochondrial.changes	0.00653125	0.921487	0.971422	19	0.913	0.982498		-0.0629056	0.00136894	0.0113763	216	0.093	0.952057
apoptotic.process	-0.0322586	0.0129772	0.0902958	510	0.111	0.533722		-0.0259447	1.62953e-23	1.96045e-20	13109	0.016	0.815583
apoptotic.signaling.pathway	-0.095243	0.0137117	0.0928642	56	0.181	0.606099		-0.0188061	0.0468146	0.152144	935	0.366	0.980796
arachidonic.acid.epoxygenase.activity	0.230524	0.00282117	0.0328964	14	0.381	0.756819		0.0597896	0.0691958	0.19763	77	0.472	0.991234
arachidonic.acid.metabolic.process	0.143083	0.0267439	0.142507	20	0.214	0.633686		-0.00050595	0.976618	0.989268	280	0.988	0.999685
arachidonic.acid.secretion	0.0812169	0.168433	0.422245	24	0.177	0.602964		0.00758631	0.630258	0.778736	336	0.783	0.99426
ARF.guanyl.nucleotide.exchange.factor.activity	0.0911517	0.180609	0.437802	18	0.266	0.671415		-0.00350706	0.792035	0.884942	472	0.917	0.995934
armadillo.repeat.domain.binding	0.0622607	0.495362	0.754356	10	NA	NA		0.000563023	0.965635	0.982854	489	0.988	0.999685
aromatase.activity	0.195424	0.024804	0.137467	11	0.15	0.569156		0.0934128	0.00254715	0.0182073	87	0.151	0.955333
Arp2.3.complex.mediated.actin.nucleation	-0.00255496	0.972668	0.993682	15	0.972	0.998486		-0.00883653	0.601777	0.75822	291	0.78	0.99426
artery.morphogenesis	-0.072071	0.231515	0.500555	23	0.351	0.735568		-0.00315745	0.719519	0.840047	1083	0.959	0.995934
arylsulfatase.activity	0.0851819	0.269774	0.543682	14	0.45	0.799645		0.0212069	0.275019	0.477444	221	0.469	0.991234
aspartic.type.endopeptidase.activity	0.0571699	0.401054	0.671807	18	0.569	0.872314		0.00477919	0.813606	0.897544	203	0.863	0.994939
associative.learning	0.0202076	0.731843	0.887569	24	0.792	0.948795		-0.00579659	0.547692	0.721192	900	0.809	0.99426
astrocyte.activation	-0.101589	0.147004	0.388922	17	0.292	0.692192		-0.0151452	0.386303	0.583916	273	0.62	0.991544
astrocyte.development	0.0134449	0.861719	0.944176	14	0.851	0.964404		-0.0440804	0.000434898	0.00466836	532	0.282	0.978302
ATP.binding	0.011587	0.155733	0.402995	1363	0.373	0.755325		-0.0142745	5.10249e-16	1.85588e-13	31083	0.341	0.980215
ATP.dependent.chromatin.remodeling	-0.0104155	0.84608	0.937276	29	0.91	0.982498		-0.0650316	3.54338e-10	3.64595e-08	778	0.077	0.918596
ATP.dependent.microtubule.motor.activity..minus.end.directed	0.0429379	0.539914	0.781881	17	0.747	0.936603		-0.0022623	0.878681	0.937868	380	0.956	0.995934
ATP.dependent.microtubule.motor.activity..plus.end.directed	0.039305	0.59814	0.815662	15	0.609	0.890018		-0.00161625	0.902878	0.950038	476	0.952	0.995934
ATP.metabolic.process	0.109994	0.0312965	0.15518	32	0.083	0.494134		-0.0125294	0.283584	0.486001	612	0.618	0.991234
ATP.transport	0.0389189	0.640612	0.840555	12	0.715	0.921614		-0.0276673	0.306279	0.507936	114	0.468	0.991234
ATPase.activator.activity	-0.104804	0.0818799	0.279921	23	0.107	0.530481		0.00522275	0.721443	0.841011	389	0.843	0.994939
ATPase.activity	0.0373245	0.085352	0.286738	179	0.281	0.687979		-0.0211764	2.2474e-06	7.18799e-05	4235	0.218	0.97695
ATPase.activity..coupled	0.0757718	0.229347	0.499715	21	0.452	0.800764		-0.0489328	0.000596086	0.00606952	411	0.024	0.856986
ATPase.activity..coupled.to.transmembrane.movement.of.substances	0.156439	0.000130212	0.00330202	50	0.014	0.293916		0.000394525	0.969295	0.985062	796	0.986	0.999685
ATPase.binding	-0.0229232	0.504357	0.761327	71	0.579	0.872732		-0.0280063	0.000218598	0.00278184	1461	0.153	0.955333
atrial.septum.morphogenesis	-0.189161	0.0298177	0.150789	11	0.061	0.464926		-0.0315643	0.0115323	0.0557542	535	0.411	0.985625
autophagosome	0.0354058	0.339008	0.616716	61	0.473	0.820883		-0.0226338	0.00178197	0.013998	1599	0.132	0.952057
autophagosome.assembly	0.0508825	0.208831	0.473127	51	0.271	0.674805		-0.0521869	7.44693e-09	5.19956e-07	1027	0.011	0.792811
autophagosome.maturation	0.0201242	0.755371	0.896989	20	0.733	0.928431		-0.0305452	0.0199225	0.0835448	485	0.353	0.980215
autophagosome.membrane	0.0451972	0.425049	0.695287	26	0.408	0.774471		-0.00998293	0.366479	0.56748	684	0.729	0.99426
autophagy	0.0186811	0.512658	0.766274	103	0.451	0.800205		-0.0134982	0.0136916	0.0637309	2814	0.305	0.978302
autophagy.of.mitochondrion	0.0798816	0.123752	0.356127	31	0.182	0.608286		-0.0529859	2.00772e-07	9.23552e-06	805	0.093	0.952057
axolemma	0.182299	0.0228492	0.12968	13	0.038	0.403721		-0.0124394	0.202775	0.394321	877	0.652	0.993185
axon	0.0784631	1.05658e-05	0.000437908	267	0.025	0.366736		0.000646815	0.817918	0.900038	11091	0.957	0.995934
axon.cytoplasm	0.0903545	0.0256323	0.13931	51	0.04	0.407674		-0.0320021	1.33692e-05	0.000303036	1553	0.028	0.857677
axon.development	-0.00822564	0.921401	0.971422	12	0.939	0.989385		-0.00492725	0.802018	0.890751	216	0.926	0.995934
axon.extension	0.0384336	0.497569	0.755567	26	0.598	0.884636		0.0225802	0.00525946	0.0311229	1280	0.645	0.993185
axon.guidance	0.0398165	0.054923	0.218375	196	0.43	0.789722		-0.00649289	0.0157155	0.0701058	12176	0.606	0.991234
axon.initial.segment	0.121379	0.0602159	0.231222	20	0.175	0.60152		-0.021945	0.0184453	0.0790368	965	0.296	0.978302
axon.regeneration	-0.0147238	0.84348	0.936933	15	0.864	0.9681		-0.0280529	0.0126679	0.0599109	660	0.15	0.955333
axon.terminus	0.0328903	0.421164	0.691166	50	0.572	0.872314		-0.0156409	0.0210014	0.0868027	1829	0.293	0.978302
axonal.fasciculation	0.0124373	0.847307	0.93799	20	0.859	0.966823		0.00603445	0.465037	0.654475	1228	0.846	0.994939
axonal.growth.cone	0.0910345	0.101581	0.313627	27	0.215	0.63397		-0.0106855	0.222562	0.418575	1091	0.672	0.993993
axonemal.dynein.complex	-0.143473	0.11615	0.341464	10	0.529	0.849599		-0.0177387	0.299862	0.502655	285	0.693	0.99426
axonemal.dynein.complex.assembly	-0.234098	0.0103603	0.0786929	10	0.079	0.494134		-0.00987979	0.618423	0.769408	212	0.76	0.99426
axoneme	-0.0349353	0.280239	0.557698	80	0.628	0.893575		0.00474367	0.403596	0.599169	2613	0.752	0.99426
axoneme.assembly	-0.14295	0.0743121	0.264293	13	0.157	0.576983		0.0464315	0.000729379	0.00702864	442	0.099	0.952057
axonogenesis	0.0678429	0.0466164	0.197718	72	0.134	0.551413		-0.0170347	0.000429932	0.00463095	3617	0.34	0.980215
azurophil.granule.lumen	0.0541091	0.0965185	0.305966	79	0.409	0.775949		-0.00747351	0.373454	0.572867	1188	0.702	0.99426
azurophil.granule.membrane	-0.0177833	0.648326	0.847469	55	0.765	0.94102		0.00204542	0.838347	0.91265	832	0.928	0.995934
B.cell.activation	-0.0874839	0.115631	0.340202	27	0.212	0.633686		-0.0564512	1.37084e-09	1.21652e-07	964	0.07	0.902063
B.cell.differentiation	-0.0693698	0.0448331	0.1936	70	0.197	0.625052		-0.0492961	1.80745e-13	3.62417e-11	1874	0.016	0.815583
B.cell.homeostasis	0.0182895	0.771707	0.905572	21	0.773	0.94102		-0.0434491	7.7047e-05	0.00125522	692	0.004	0.747003
B.cell.proliferation	-0.0824511	0.101198	0.312952	33	0.486	0.82835		-0.040498	0.000178224	0.00236222	716	0.046	0.887495
B.cell.receptor.signaling.pathway	-0.0425579	0.376933	0.652234	36	0.407	0.77425		-0.049005	4.05934e-08	2.2355e-06	1050	0.009	0.786369
barbed.end.actin.filament.capping	0.169322	0.0282591	0.146748	14	0.088	0.503308		-0.0526353	0.000586873	0.00599523	356	0.057	0.902063
basal.part.of.cell	-0.043141	0.576217	0.801969	14	0.593	0.881314		-0.0315592	0.051029	0.161623	319	0.341	0.980215
basal.plasma.membrane	0.0202372	0.691978	0.868504	32	0.74	0.933252		-0.0110082	0.150987	0.32769	1427	0.492	0.991234
base.excision.repair	-0.080023	0.123089	0.35529	31	0.152	0.571794		0.00606744	0.548949	0.722108	816	0.768	0.99426
basement.membrane	0.0973306	0.00232305	0.0285735	82	0.033	0.394715		-0.000983087	0.856033	0.924308	2874	0.926	0.995934
basement.membrane.organization	0.0114323	0.895539	0.962426	11	0.921	0.985962		-0.0181676	0.353007	0.554822	218	0.587	0.991234
basolateral.plasma.membrane	0.0348548	0.10065	0.312014	187	0.544	0.856043		-0.0127321	0.000961226	0.0086875	5747	0.535	0.991234
behavioral.fear.response	0.0293219	0.591262	0.812719	28	0.71	0.921614		-0.0326276	0.000129927	0.00185745	1152	0.053	0.887495
behavioral.response.to.cocaine	0.145762	0.024027	0.134136	20	0.042	0.412471		0.0337637	0.0104729	0.0519921	480	0.476	0.991234
behavioral.response.to.ethanol	0.0579736	0.525521	0.774088	10	NA	NA		-0.0278775	0.166953	0.349682	205	0.345	0.980215
behavioral.response.to.pain	0.142249	0.087949	0.290597	12	0.212	0.633686		-0.0411363	0.0559925	0.171778	180	0.295	0.978302
beta.catenin.binding	-0.0351692	0.283091	0.560001	78	0.408	0.774471		-0.0111444	0.0149346	0.0675273	4046	0.316	0.979216
beta.catenin.destruction.complex	-0.0668951	0.463829	0.730517	10	NA	NA		-0.0164325	0.343725	0.546326	277	0.69	0.994068
beta.catenin.destruction.complex.disassembly	-0.0597741	0.343	0.621901	21	0.486	0.82835		-0.0205306	0.0910433	0.237438	566	0.382	0.98313
beta.catenin.TCF.complex.assembly	-0.0231105	0.666665	0.854503	29	0.737	0.930472		-0.0103665	0.211128	0.403866	1219	0.626	0.991544
beta.tubulin.binding	0.00510158	0.920447	0.971422	32	0.885	0.974195		-0.00550062	0.471331	0.659948	1438	0.785	0.99426
bHLH.transcription.factor.binding	-0.169041	0.006057	0.0573085	22	0.056	0.455536		-0.048918	1.23017e-09	1.09942e-07	1293	0.021	0.833604
bicarbonate.transmembrane.transporter.activity	0.0289143	0.728715	0.88603	12	0.807	0.950978		0.00743956	0.694184	0.822628	233	0.784	0.99426
bicarbonate.transport	0.0283118	0.54071	0.782625	39	0.634	0.89774		-0.00132995	0.888611	0.942928	928	0.96	0.996112
bicellular.tight.junction	0.0266336	0.33052	0.608533	112	0.476	0.820883		0.00927662	0.0550507	0.169955	3621	0.546	0.991234
bicellular.tight.junction.assembly	0.00533398	0.916836	0.971422	32	0.924	0.986858		0.00148345	0.881055	0.938632	851	0.965	0.997396
bile.acid.and.bile.salt.transport	0.0120452	0.83815	0.935284	24	0.913	0.982498		-0.0273062	0.0264373	0.102473	552	0.276	0.978302
bile.acid.biosynthetic.process	0.115665	0.0375069	0.173771	27	0.28	0.68601		0.0359959	0.00499523	0.029906	508	0.052	0.887495
bile.acid.metabolic.process	0.185005	0.0336054	0.161994	11	0.122	0.542119		0.0310372	0.124796	0.289714	204	0.427	0.989697
bile.acid.transmembrane.transporter.activity	-0.108354	0.2354	0.505424	10	0.374	0.755325		-0.0483402	0.0310265	0.115208	166	0.345	0.980215
binding.of.sperm.to.zona.pellucida	-0.129813	0.00881034	0.0716286	34	0.141	0.561119		-0.0118309	0.366769	0.56761	486	0.694	0.99426
biological_process	-0.00339606	0.798133	0.914743	487	0.853	0.964404		-0.0105949	0.000188778	0.002479	10860	0.418	0.985754
biomineral.tissue.development	0.0846798	0.120938	0.351477	28	0.278	0.684939		-8.30407e-05	0.996266	0.998117	265	0.997	0.999685
bitter.taste.receptor.activity	-0.00720313	0.906895	0.968083	22	0.953	0.993974		0.0123929	0.754661	0.863289	53	0.834	0.994939
blastocyst.development	-0.206992	0.00414787	0.0440885	16	0.012	0.28427		0.0407559	0.0103813	0.0516915	330	0.223	0.977774
blastocyst.formation	-0.205971	0.00433702	0.0455566	16	0.015	0.297119		-0.0715888	0.000104629	0.00159028	245	0.066	0.902063
blastocyst.hatching	0.00724703	0.902191	0.964953	24	0.913	0.982498		-0.0477381	0.000299744	0.00350635	479	0.354	0.980215
bleb.assembly	0.079017	0.386874	0.658844	10	NA	NA		-0.081235	1.07081e-05	0.000253749	245	0.013	0.815583
blood.circulation	-0.0230812	0.636562	0.83762	35	0.698	0.920341		-0.0296026	0.000514045	0.00537052	1153	0.256	0.978302
blood.coagulation	-0.0281611	0.222341	0.488778	158	0.539	0.852383		-0.0171781	0.000584678	0.00597671	3389	0.232	0.978302
blood.coagulation..intrinsic.pathway	-0.0325223	0.652414	0.850078	16	0.742	0.934765		-0.00635834	0.765823	0.870834	183	0.861	0.994939
blood.microparticle	0.0305608	0.296077	0.574479	98	0.704	0.921614		-0.00493867	0.52543	0.704829	1386	0.822	0.994939
blood.vessel.development	-0.0804428	0.0904384	0.293844	37	0.09	0.506485		-0.0207361	0.00837993	0.0437165	1355	0.468	0.991234
blood.vessel.morphogenesis	0.0878984	0.184695	0.444976	19	0.17	0.598927		0.00496208	0.682423	0.815884	568	0.839	0.994939
blood.vessel.remodeling	-0.0136637	0.789095	0.911473	32	0.861	0.966901		-0.0280855	0.000271796	0.00324	1409	0.253	0.978302
BMP.receptor.binding	0.0340717	0.695566	0.869572	11	0.662	0.910316		0.0343548	0.00927056	0.0473519	479	0.217	0.97695
BMP.signaling.pathway	-0.064258	0.0498526	0.205994	78	0.086	0.497551		-0.0308144	1.96613e-08	1.22511e-06	2801	0.092	0.952057
bone.development	-0.00391764	0.931685	0.975848	40	0.96	0.995952		-0.0208395	0.0116359	0.0561858	1228	0.22	0.97695
bone.mineralization	-0.0234943	0.594048	0.813674	43	0.659	0.908861		-0.00746621	0.272546	0.474547	1814	0.794	0.99426
bone.morphogenesis	-0.0113617	0.829478	0.93236	30	0.87	0.969863		-0.0187828	0.0368394	0.129534	1034	0.548	0.991234
bone.remodeling	0.0589212	0.429452	0.698891	15	0.542	0.854814		-0.0249164	0.0338401	0.122457	606	0.53	0.991234
bone.resorption	0.0121793	0.839767	0.935993	23	0.873	0.969886		-0.000680652	0.956598	0.978816	534	0.976	0.999685
brain.development	0.0417315	0.0458758	0.196204	193	0.205	0.62881		-0.00403354	0.189765	0.378996	9172	0.74	0.99426
brain.morphogenesis	-0.00437889	0.945949	0.981507	20	0.944	0.990028		-0.0146636	0.0869759	0.230599	1141	0.588	0.991234
branched.chain.amino.acid.catabolic.process	0.244273	0.000227611	0.00471674	19	0.061	0.464926		-0.0254179	0.101715	0.254938	346	0.374	0.980897
branching.involved.in.blood.vessel.morphogenesis	-0.0579421	0.288614	0.566407	28	0.467	0.816609		-0.0158035	0.0729363	0.20587	1078	0.633	0.991698
branching.involved.in.mammary.gland.duct.morphogenesis	-0.0411862	0.607113	0.821488	13	0.655	0.907273		0.0140084	0.314178	0.516872	431	0.722	0.99426
branching.involved.in.salivary.gland.morphogenesis	0.141719	0.103602	0.317297	11	0.138	0.554849		-0.0119032	0.44941	0.641311	337	0.742	0.99426
branching.involved.in.ureteric.bud.morphogenesis	0.00161274	0.9715	0.993405	41	0.975	0.999241		-0.00401849	0.470153	0.659065	2724	0.86	0.994939
branching.morphogenesis.of.an.epithelial.tube	-0.0783182	0.214075	0.479594	21	0.287	0.689234		-0.0287471	0.00430136	0.0269632	825	0.27	0.978302
brown.fat.cell.differentiation	0.0831341	0.134876	0.372937	27	0.256	0.662388		-0.00256407	0.792333	0.885086	882	0.929	0.995934
brush.border	0.154427	0.000214955	0.00459935	48	0.044	0.415806		0.00382316	0.590266	0.752508	1665	0.872	0.994939
brush.border.membrane	0.0274765	0.501585	0.75985	50	0.784	0.946523		0.00278417	0.776333	0.876668	871	0.937	0.995934
C.C.chemokine.binding	-0.188001	0.00360679	0.039411	20	0.085	0.494212		-0.0125808	0.428175	0.622713	331	0.744	0.99426
C.C.chemokine.receptor.activity	-0.176223	0.00636593	0.0593479	20	0.101	0.52616		-0.014371	0.419737	0.614497	263	0.717	0.99426
C21.steroid.hormone.biosynthetic.process	0.0940493	0.303049	0.583011	10	NA	NA		0.00594726	0.780562	0.879602	183	0.921	0.995934
C2H2.zinc.finger.domain.binding	-0.00174721	0.98194	0.996842	14	0.989	1		-0.0464075	7.90125e-06	0.0001961	775	0.307	0.97849
cadherin.binding	0.0631445	0.000264193	0.00538699	283	0.036	0.401962		-0.000860597	0.783096	0.880033	8868	0.939	0.995934
cadherin.binding.involved.in.cell.cell.adhesion	0.219596	0.00125736	0.0185109	18	0.002	0.13749		0.0248733	0.0762983	0.212105	424	0.363	0.980796
Cajal.body	-0.0742158	0.092255	0.297732	43	0.176	0.602594		-0.00769704	0.378096	0.576582	1098	0.693	0.99426
calcineurin.NFAT.signaling.cascade	-0.0590423	0.517916	0.768897	10	NA	NA		-0.0280793	0.0537198	0.167166	394	0.377	0.980897
calcium.activated.cation.channel.activity	0.0136584	0.859545	0.942065	14	0.897	0.978799		-0.0810013	6.65237e-08	3.52688e-06	371	0.036	0.867951
calcium.activated.potassium.channel.activity	0.128444	0.108806	0.327967	13	0.064	0.468443		0.0148579	0.276447	0.478754	448	0.694	0.99426
calcium.channel.activity	0.121336	0.00330549	0.0371795	49	0.091	0.509658		-0.0088101	0.298991	0.501686	1164	0.687	0.994068
calcium.channel.complex	0.150725	0.036849	0.172188	16	0.082	0.494134		-0.0296022	0.00234215	0.0171653	884	0.014	0.815583
calcium.channel.regulator.activity	0.0458683	0.376793	0.652234	31	0.507	0.840048		-0.0345638	7.22619e-06	0.000185275	1413	0.154	0.955333
calcium.dependent.cell.cell.adhesion.via.plasma.membrane.cell.adhesion.molecules	0.0672474	0.1228	0.354724	44	0.392	0.764378		0.0185065	0.00271808	0.019029	2208	0.359	0.980215
calcium.dependent.cysteine.type.endopeptidase.activity	0.117297	0.104275	0.318349	16	0.214	0.633686		0.0551854	0.00153354	0.0124815	275	0.3	0.978302
calcium.dependent.phospholipase.A2.activity	0.137805	0.0646088	0.241007	15	0.15	0.569156		-0.0323304	0.207029	0.399593	127	0.38	0.981374
calcium.dependent.phospholipid.binding	0.229829	1.89882e-08	1.62682e-06	50	0	0		0.0121895	0.138891	0.309966	1235	0.645	0.993185
calcium.dependent.protein.binding	0.103109	0.00818241	0.0690255	55	0.063	0.468443		0.00720605	0.395199	0.591474	1166	0.768	0.99426
calcium.independent.cell.cell.adhesion.via.plasma.membrane.cell.adhesion.molecules	0.113999	0.0705313	0.255324	21	0.162	0.585538		-0.00503674	0.756975	0.864925	315	0.912	0.995797
calcium.ion.binding	0.0714947	1.14659e-09	1.1816e-07	628	0.007	0.250429		-0.00178223	0.414744	0.610018	19020	0.854	0.994939
calcium.ion.homeostasis	-0.033493	0.595189	0.813731	21	0.572	0.872314		0.00353159	0.751136	0.861273	674	0.84	0.994939
calcium.ion.import	0.17192	0.00431612	0.0454624	23	0.126	0.546728		-0.013317	0.188901	0.377801	814	0.76	0.99426
calcium.ion.regulated.exocytosis	0.169752	0.00187792	0.0249352	28	0.017	0.315354		0.00791088	0.382744	0.581459	1019	0.782	0.99426
calcium.ion.regulated.exocytosis.of.neurotransmitter	0.11541	0.149623	0.391836	13	0.197	0.625052		0.0191667	0.0992822	0.250925	618	0.549	0.991234
calcium.ion.transmembrane.transport	0.0709605	0.00985011	0.0768067	111	0.215	0.63397		-0.0164207	0.00101774	0.00901836	3386	0.409	0.985625
calcium.ion.transport	0.12435	0.000322819	0.0062167	70	0.012	0.28427		-0.0120133	0.0718815	0.203477	1886	0.69	0.994068
calcium.ion.transport.into.cytosol	0.0859679	0.302443	0.582137	12	0.474	0.820883		0.0193744	0.130405	0.298309	509	0.564	0.991234
calcium.mediated.signaling	-0.046848	0.16944	0.423158	72	0.313	0.710277		-0.0228013	0.000821858	0.00766937	1808	0.083	0.940415
calcium.mediated.signaling.using.intracellular.calcium.source	-0.0588544	0.362195	0.638978	20	0.399	0.767835		-0.0607619	4.86852e-05	0.00086922	373	0.137	0.952057
calcium.release.channel.activity	0.119666	0.135178	0.373251	13	0.34	0.730417		-0.00223516	0.879347	0.938066	385	0.943	0.995934
calcium.transporting.ATPase.activity	0.083126	0.362666	0.638978	10	NA	NA		-0.0408838	0.0458241	0.149966	199	0.363	0.980796
calmodulin.binding	0.064634	0.00188338	0.0249352	195	0.119	0.541134		1.57176e-05	0.996902	0.998434	5203	1	1
calmodulin.dependent.protein.kinase.activity	0.0201056	0.733144	0.888706	24	0.773	0.94102		0.0114843	0.309292	0.5114	655	0.745	0.99426
calyx.of.Held	0.130633	0.043128	0.191057	20	0.106	0.530151		-0.0101612	0.373499	0.572867	641	0.79	0.99426
camera.type.eye.development	-0.00467833	0.918463	0.971422	40	0.925	0.986858		-0.0157081	0.0160472	0.0712398	1975	0.389	0.984918
camera.type.eye.morphogenesis	0.141089	0.0440032	0.192344	17	0.035	0.39712		0.0496253	6.24539e-09	4.51008e-07	1148	0.142	0.952057
cAMP.binding	0.0560583	0.352042	0.632283	23	0.446	0.797548		-0.0260128	0.00973325	0.0492169	826	0.267	0.978302
cAMP.biosynthetic.process	-0.0094952	0.917185	0.971422	10	0.942	0.98941		0.00496191	0.813758	0.897544	188	0.91	0.995797
cAMP.dependent.protein.kinase.complex	-0.102358	0.239764	0.509316	11	0.348	0.732786		-0.0632555	1.87593e-05	0.000397556	382	0.051	0.887495
cAMP.mediated.signaling	0.122099	0.0311659	0.15518	26	0.09	0.506485		-0.0266088	0.000970997	0.00874792	1288	0.081	0.934248
cAMP.response.element.binding	-0.119106	0.137014	0.376258	13	0.177	0.602964		-0.0425104	0.000208383	0.0026824	636	0.042	0.880536
canonical.glycolysis	0.138947	0.0124568	0.0881217	27	0.155	0.575667		-0.025758	0.0731505	0.206251	404	0.46	0.991234
canonical.Wnt.signaling.pathway	-0.0473008	0.165353	0.418262	72	0.416	0.782223		-0.032294	3.36919e-08	1.90921e-06	2462	0.204	0.973919
carbohydrate.binding	-0.00377723	0.870793	0.949209	156	0.952	0.993974		0.00225046	0.662862	0.800991	3171	0.828	0.994939
carbohydrate.metabolic.process	-0.0199619	0.465807	0.732119	112	0.637	0.899445		-0.0142289	0.0396838	0.135994	1755	0.519	0.991234
carbohydrate.phosphorylation	-0.0451718	0.495449	0.754356	19	0.644	0.903103		-0.0326748	0.0268765	0.103739	383	0.312	0.979216
carbohydrate.transport	0.0292849	0.634435	0.83643	22	0.621	0.892877		0.0129779	0.337001	0.539477	457	0.742	0.99426
carbonate.dehydratase.activity	0.0127587	0.86415	0.945516	15	0.866	0.968675		0.0721005	7.26947e-06	0.000185587	323	0.119	0.952057
carboxylic.ester.hydrolase.activity	0.0824928	0.130841	0.367822	28	0.299	0.697932		-0.0100033	0.499713	0.683446	380	0.57	0.991234
carboxypeptidase.activity	0.0947108	0.189629	0.449661	16	0.265	0.670339		-0.0469777	0.00171157	0.0135608	372	0.216	0.97695
CARD.domain.binding	-0.0762431	0.323262	0.603041	14	0.695	0.920193		0.0396378	0.176358	0.362372	97	0.39	0.984918
cardiac.conduction	0.0618225	0.160774	0.41088	43	0.502	0.836905		-0.00945925	0.150249	0.326783	1944	0.637	0.99309
cardiac.epithelial.to.mesenchymal.transition	0.00820891	0.918371	0.971422	13	0.917	0.983783		0.0155623	0.187978	0.376968	598	0.447	0.99065
cardiac.left.ventricle.morphogenesis	-0.00792223	0.930866	0.975848	10	NA	NA		-0.0308867	0.0783547	0.21579	271	0.473	0.991234
cardiac.muscle.cell.action.potential.involved.in.contraction	0.00283713	0.968657	0.992991	16	0.983	1		-0.00826499	0.459963	0.650219	668	0.731	0.99426
cardiac.muscle.cell.differentiation	-0.0756495	0.2301	0.499852	21	0.242	0.655175		-0.0168839	0.0423591	0.142381	1211	0.662	0.993993
cardiac.muscle.cell.proliferation	0.0725167	0.36528	0.640075	13	0.397	0.766877		0.0198362	0.0890544	0.234263	614	0.614	0.991234
cardiac.muscle.contraction	0.0324408	0.467012	0.732756	42	0.669	0.910316		-0.0200054	0.00642491	0.0360422	1557	0.321	0.979216
cardiac.muscle.fiber.development	0.225707	0.00127304	0.0186202	17	0.025	0.366736		-0.0168596	0.171688	0.355891	549	0.628	0.991544
cardiac.muscle.hypertrophy.in.response.to.stress	0.0607296	0.431405	0.700812	14	0.488	0.830145		-0.0511208	7.3184e-06	0.000185869	643	0.203	0.973305
cardiac.muscle.tissue.development	0.092423	0.187053	0.447316	17	0.255	0.661265		0.0233475	0.0486179	0.156223	596	0.322	0.979782
cardiac.muscle.tissue.morphogenesis	0.137129	0.043987	0.192344	18	0.143	0.562691		-0.00529636	0.633593	0.780452	677	0.873	0.994939
cardiac.myofibril.assembly	0.200274	0.00326385	0.0369481	18	0.017	0.315354		-0.0282372	0.0174581	0.0759284	592	0.451	0.99065
cardiac.right.ventricle.morphogenesis	0.0113334	0.896437	0.96312	11	0.919	0.984723		0.023149	0.0578242	0.175572	561	0.449	0.99065
cardiac.septum.development	-0.0234889	0.797007	0.914743	10	NA	NA		-0.0264645	0.0617432	0.182925	416	0.252	0.978302
cardiac.septum.morphogenesis	-0.0148964	0.852463	0.939705	13	0.845	0.963751		0.0111381	0.357137	0.558667	571	0.667	0.993993
cardiovascular.system.development	0.0184165	0.825162	0.92977	12	0.824	0.955655		-0.0172573	0.167635	0.350603	534	0.694	0.99426
cargo.loading.into.COPII.coated.vesicle	0.103189	0.215796	0.480626	12	0.38	0.756819		-0.0236889	0.267147	0.468302	183	0.487	0.991234
cargo.receptor.activity	-0.0206291	0.796755	0.914743	13	0.826	0.956708		0.0560732	0.000167593	0.00224606	376	0.051	0.887495
carnitine.shuttle	0.0286506	0.742117	0.89012	11	0.787	0.947763		0.0342511	0.0396728	0.135994	301	0.276	0.978302
cartilage.condensation	0.0793035	0.23141	0.500555	19	0.245	0.655202		-0.0247714	0.0175926	0.0762395	768	0.504	0.991234
cartilage.development	-0.0440383	0.258708	0.531577	55	0.252	0.658846		-0.0183388	0.000968393	0.00873453	2730	0.537	0.991234
caspase.binding	-0.030436	0.738909	0.889607	10	NA	NA		-0.0393774	0.311777	0.514366	55	0.469	0.991234
catalytic.activity	0.0689285	0.113717	0.337697	44	0.2	0.627064		0.0378643	5.08564e-07	2.03426e-05	1476	0.017	0.815583
catalytic.step.2.spliceosome	-0.0318595	0.381956	0.656052	63	0.54	0.853195		-0.0189515	0.0124607	0.0592176	1458	0.395	0.985042
catenin.complex	0.0826472	0.130122	0.367097	28	0.246	0.655875		0.0166748	0.0138216	0.0641075	1831	0.459	0.991234
cation.channel.activity	0.238904	0.000937442	0.0144715	16	0.003	0.156985		-0.0326018	0.0337336	0.122185	354	0.327	0.980206
cation.channel.complex	0.0472164	0.605116	0.821398	10	0.609	0.890018		-0.0477608	0.0193472	0.0818484	200	0.198	0.971127
cation.transmembrane.transport	0.0408632	0.537466	0.780708	19	0.703	0.921614		0.00500069	0.739855	0.854373	368	0.881	0.994939
cation.transport	0.156695	0.0013375	0.0191725	35	0.064	0.468443		-0.031225	0.00624288	0.0353251	641	0.282	0.978302
caveola	-0.053572	0.144712	0.385697	62	0.474	0.820883		-0.0235387	6.24964e-05	0.00106475	2436	0.171	0.962029
CCR.chemokine.receptor.binding	-0.075902	0.172228	0.426431	27	0.387	0.761404		0.0508613	0.089365	0.234587	93	0.278	0.978302
CCR4.NOT.complex	0.159505	0.0669643	0.246939	11	NA	NA		-0.00996938	0.608658	0.763323	220	0.781	0.99426
CD40.receptor.complex	-0.0683712	0.432312	0.701494	11	0.487	0.828846		-0.0473602	0.0300455	0.112691	175	0.261	0.978302
CDP.diacylglycerol.biosynthetic.process	0.00491601	0.954975	0.986654	11	0.971	0.998486		0.00536096	0.831723	0.908403	131	0.897	0.995585
cell	-0.0400724	0.2273	0.496388	76	0.459	0.808264		-0.010813	0.166112	0.348591	1375	0.73	0.99426
cell.adhesion	0.0375469	0.0102722	0.0781795	399	0.251	0.658846		0.019378	6.07119e-15	1.63713e-12	14411	0.062	0.902063
cell.adhesion.mediated.by.integrin	0.0265193	0.689016	0.866831	19	0.777	0.943737		-0.0506515	1.79685e-05	0.000385902	599	0.047	0.887495
cell.adhesion.molecule.binding	0.109317	0.00812597	0.0688541	49	0.056	0.455536		0.00893303	0.0367679	0.129485	4648	0.596	0.991234
cell.aging	-0.0419932	0.467365	0.732756	25	0.376	0.755448		-0.0237571	0.0288982	0.109649	707	0.554	0.991234
cell.body	-0.0489271	0.186412	0.447316	61	0.332	0.724777		-0.0120368	0.127608	0.294132	1343	0.641	0.993185
cell.cell.adherens.junction	0.109023	0.000208438	0.00458785	97	0.017	0.315354		0.0217004	3.56852e-07	1.52909e-05	4681	0.108	0.952057
cell.cell.adhesion	0.063879	0.00865232	0.071102	142	0.079	0.494134		-0.00256666	0.472022	0.660436	6740	0.865	0.994939
cell.cell.adhesion.mediated.by.cadherin	0.0519074	0.359604	0.637738	26	0.432	0.790676		0.00879127	0.200463	0.392176	1781	0.675	0.993993
cell.cell.adhesion.mediator.activity	-0.0338106	0.600654	0.817747	20	0.638	0.900494		0.0161657	0.0371837	0.13016	1393	0.597	0.991234
cell.cell.adhesion.via.plasma.membrane.adhesion.molecules	0.10597	0.223581	0.490514	11	0.181	0.606099		0.0220768	0.0904952	0.236403	491	0.537	0.991234
cell.cell.contact.zone	0.167336	0.0447237	0.1936	12	0.074	0.489517		0.0466289	2.23851e-05	0.000465562	691	0.027	0.857677
cell.cell.junction	0.056666	0.0156597	0.101895	153	0.122	0.542119		0.00174805	0.653509	0.794775	5633	0.879	0.994939
cell.cell.junction.assembly	0.110804	0.0110022	0.0817768	44	0.055	0.454788		0.00826664	0.183085	0.370602	2182	0.617	0.991234
cell.cell.junction.organization	0.0277526	0.683535	0.863591	18	0.704	0.921614		0.0494945	8.31302e-05	0.00132236	528	0.215	0.97695
cell.cell.signaling	-0.0346132	0.0864822	0.288501	207	0.27	0.674805		0.00620376	0.135243	0.305427	4937	0.758	0.99426
cell.chemotaxis	-0.117381	0.00116803	0.0174655	64	0.071	0.484292		0.0108024	0.12782	0.294341	1668	0.605	0.991234
cell.communication	0.0687193	0.225192	0.492856	26	0.334	0.726429		0.00924479	0.374063	0.57317	773	0.754	0.99426
cell.communication.by.electrical.coupling.involved.in.cardiac.conduction	-0.113596	0.156128	0.403331	13	0.09	0.506485		-0.000478013	0.968587	0.984897	567	0.991	0.999685
cell.cortex	0.0518108	0.0510844	0.209221	119	0.056	0.455536		-0.00524837	0.24236	0.44127	4212	0.726	0.99426
cell.cortex.region	-0.0173227	0.842302	0.936814	11	0.876	0.970381		0.00292931	0.855613	0.924141	322	0.905	0.995797
cell.cycle	-0.0732778	0.000172223	0.00400418	222	0.051	0.440409		-0.00686331	0.0918448	0.238416	5142	0.652	0.993185
cell.cycle.arrest	-0.0761255	0.00385151	0.0416029	121	0.027	0.374158		-0.0234482	2.09595e-06	6.74486e-05	3463	0.102	0.952057
cell.death	0.0385356	0.465099	0.731912	30	0.539	0.852383		0.00411994	0.665725	0.803266	920	0.817	0.994939
cell.development	-0.0791785	0.0724625	0.259096	43	0.099	0.524311		-0.00755252	0.295814	0.499498	1608	0.722	0.99426
cell.differentiation	-0.00982401	0.461175	0.728163	483	0.791	0.948795		-0.00906035	0.000285289	0.00336866	14244	0.652	0.993185
cell.division	-0.125455	3.16078e-14	6.34318e-12	311	0.003	0.156985		-0.0110775	0.00126245	0.0106844	7291	0.351	0.980215
cell.fate.commitment	-0.0083667	0.839467	0.935993	49	0.902	0.980464		-0.043104	4.18694e-16	1.55914e-13	3006	0.06	0.902063
cell.fate.determination	0.0906374	0.195714	0.457956	17	0.339	0.730417		0.0129102	0.0965652	0.246818	1389	0.682	0.994068
cell.fate.specification	-0.0985908	0.0536002	0.214682	32	0.098	0.524311		-0.0368779	1.42481e-05	0.000318798	1160	0.303	0.978302
cell.junction	0.0824964	2.77107e-10	3.20184e-08	503	0.039	0.406946		-0.00173435	0.418972	0.61443	19796	0.88	0.994939
cell.junction.assembly	0.0359386	0.629852	0.834683	15	0.603	0.888285		-0.0380712	0.0129034	0.0607551	356	0.186	0.966137
cell.leading.edge	0.0241588	0.636254	0.83762	32	0.689	0.917383		-0.00664181	0.395501	0.591757	1372	0.754	0.99426
cell.matrix.adhesion	0.00443742	0.885649	0.95584	88	0.944	0.990028		-0.0102539	0.0972253	0.247978	2201	0.623	0.991544
cell.maturation	-0.00531532	0.912129	0.969754	36	0.927	0.986858		-0.016633	0.0353265	0.126114	1342	0.648	0.993185
cell.migration	-0.0060068	0.767176	0.90369	205	0.867	0.968675		-0.00174955	0.615743	0.767489	7075	0.862	0.994939
cell.migration.involved.in.sprouting.angiogenesis	-0.153119	0.0151374	0.0998292	21	0.032	0.389556		-0.0312215	0.000299718	0.00350635	1123	0.235	0.978302
cell.morphogenesis	0.0460467	0.14479	0.385697	84	0.154	0.573777		-0.0114278	0.0157444	0.0701547	3783	0.334	0.980206
cell.motility	0.135819	0.0212685	0.124191	24	0.018	0.323631		0.00720216	0.463158	0.652961	868	0.797	0.99426
cell.periphery	0.0414223	0.440101	0.709859	29	0.585	0.875378		-0.0194497	0.0400987	0.136852	932	0.401	0.985467
cell.projection	-0.00852182	0.778845	0.90809	91	0.771	0.94102		-0.0160503	0.00540629	0.0317628	2531	0.425	0.987961
cell.projection.assembly	0.0933357	0.210706	0.475312	15	0.243	0.655202		-0.0514389	0.000879973	0.00809578	349	0.175	0.962125
cell.projection.organization	0.0536304	0.286362	0.563934	33	0.286	0.689234		0.0174958	0.148761	0.324314	569	0.347	0.980215
cell.proliferation	-0.0878406	3.19321e-05	0.00109691	189	0	0		-0.0102023	0.0101101	0.0506314	5424	0.567	0.991234
cell.proliferation.in.forebrain	-0.0269516	0.756912	0.89798	11	NA	NA		-0.0354305	0.00120499	0.0102535	698	0.232	0.978302
cell.recognition	-0.00545257	0.952387	0.985201	10	0.953	0.993974		0.0284019	0.014346	0.0657557	621	0.546	0.991234
cell.redox.homeostasis	0.00162762	0.961926	0.990093	72	0.983	1		-0.0365873	1.30649e-05	0.000297865	1189	0.086	0.948547
cell.substrate.adhesion	-0.00036415	0.995732	0.999237	18	0.995	1		0.0411743	0.000161095	0.00217388	702	0.219	0.97695
cell.surface	-0.00585078	0.633876	0.836321	572	0.863	0.9681		-0.00252667	0.26259	0.463324	17749	0.797	0.99426
cell.surface.receptor.signaling.pathway	-0.0839635	0.000113612	0.00305074	178	0.164	0.589094		-0.00533826	0.245267	0.444082	4018	0.681	0.994068
cell.volume.homeostasis	0.206303	0.00322953	0.0367588	17	0.005	0.203837		-0.0573441	8.50754e-05	0.0013481	392	0.087	0.951524
cellular.amino.acid.biosynthetic.process	0.121913	0.0429804	0.191007	23	0.132	0.55118		-0.00903921	0.543529	0.718275	377	0.664	0.993993
cellular.amino.acid.metabolic.process	0.0947753	0.0882851	0.291203	27	0.24	0.65449		0.022476	0.128891	0.29584	381	0.478	0.991234
cellular.calcium.ion.homeostasis	0.0205803	0.490686	0.751399	94	0.679	0.912097		-0.0149138	0.0135298	0.0631096	2308	0.348	0.980215
cellular.copper.ion.homeostasis	-0.0301411	0.706691	0.875728	13	0.79	0.948795		0.0638254	0.0177683	0.0768306	115	0.059	0.902063
cellular.defense.response	-0.0582679	0.162606	0.41362	48	0.37	0.754198		-0.00024152	0.983469	0.99248	615	0.992	0.999685
cellular.glucose.homeostasis	0.00671409	0.919297	0.971422	19	0.916	0.983783		-0.0325496	0.00541667	0.0317886	610	0.181	0.966137
cellular.homeostasis	0.018352	0.833065	0.933074	11	0.841	0.962005		-0.0160747	0.229813	0.42733	466	0.619	0.991544
cellular.iron.ion.homeostasis	-0.0187388	0.637066	0.83762	53	0.791	0.948795		-0.00483113	0.641851	0.786351	775	0.884	0.994939
cellular.lipid.metabolic.process	0.0755158	0.281036	0.558993	17	0.204	0.628492		-0.0348397	0.0999081	0.251783	186	0.239	0.978302
cellular.oxidant.detoxification	0.0998272	0.00415101	0.0440885	69	0.15	0.569156		-0.0186921	0.0516264	0.163083	907	0.307	0.97849
cellular.potassium.ion.homeostasis	-0.0936405	0.242373	0.513133	13	0.299	0.697932		0.0203344	0.11241	0.272025	509	0.611	0.991234
cellular.protein.catabolic.process	-0.0240856	0.755007	0.896835	14	0.714	0.921614		-0.0185535	0.403596	0.599169	169	0.642	0.993185
cellular.protein.containing.complex.assembly	0.136991	0.0441996	0.192609	18	0.074	0.489517		-0.00429201	0.692226	0.821366	711	0.873	0.994939
cellular.protein.localization	-0.0102547	0.833722	0.933074	35	0.88	0.972048		-0.0242538	0.000545463	0.00564223	1706	0.264	0.978302
cellular.protein.metabolic.process	0.0246826	0.247509	0.519153	185	0.605	0.890018		-0.023084	1.06236e-06	3.82275e-05	3786	0.231	0.978302
cellular.protein.modification.process	-0.049998	0.131966	0.369168	76	0.174	0.601029		-0.00403943	0.59708	0.756061	1436	0.879	0.994939
cellular.respiration	-0.0255605	0.678127	0.859607	22	0.723	0.925799		-0.0210084	0.0391617	0.134791	806	0.319	0.979216
cellular.response.to.amino.acid.starvation	0.0269097	0.560941	0.796113	39	0.639	0.900779		-0.00396331	0.684208	0.817058	881	0.777	0.99426
cellular.response.to.amyloid.beta	-0.0277041	0.570614	0.799972	35	0.663	0.910316		-0.0189198	0.0153549	0.0689567	1376	0.273	0.978302
cellular.response.to.angiotensin	-0.150648	0.0835973	0.283844	11	0.148	0.568956		0.000862821	0.954749	0.977563	361	0.981	0.999685
cellular.response.to.ATP	0.0530712	0.46234	0.729075	16	0.575	0.872706		-0.0359581	0.0365753	0.12902	282	0.304	0.978302
cellular.response.to.BMP.stimulus	0.0506577	0.321346	0.600689	32	0.333	0.725154		-0.00499832	0.492923	0.677564	1579	0.817	0.994939
cellular.response.to.cadmium.ion	0.0518739	0.295241	0.573778	34	0.394	0.765723		-0.0499193	0.000655041	0.00651763	389	0.159	0.955333
cellular.response.to.calcium.ion	0.112673	0.000496738	0.0087284	80	0.038	0.403721		-0.0131833	0.0199714	0.0837181	2626	0.444	0.99065
cellular.response.to.cAMP	0.0704787	0.0879267	0.290597	49	0.162	0.585538		-0.0156456	0.0287405	0.109208	1640	0.352	0.980215
cellular.response.to.chemokine	0.100346	0.193586	0.455228	14	0.259	0.663297		0.00895	0.544349	0.718752	383	0.707	0.99426
cellular.response.to.cholesterol	0.195178	0.00533333	0.0528207	17	0.008	0.252685		0.0403871	0.00236888	0.0172885	473	0.261	0.978302
cellular.response.to.copper.ion	0.00180634	0.976077	0.994196	23	0.981	0.999241		-0.0120679	0.44384	0.637024	336	0.688	0.994068
cellular.response.to.cytokine.stimulus	-0.0462451	0.262846	0.535647	49	0.242	0.655175		-0.010996	0.0978798	0.24912	1904	0.432	0.989697
cellular.response.to.dexamethasone.stimulus	0.00136017	0.979775	0.995704	29	0.98	0.999241		0.00768329	0.502335	0.685473	637	0.736	0.99426
cellular.response.to.DNA.damage.stimulus	-0.135001	1.33036e-11	1.87876e-09	212	0	0		-0.0127928	0.000361033	0.00405061	6672	0.494	0.991234
cellular.response.to.dopamine	-0.0702161	0.399641	0.6707	12	0.401	0.767835		0.016715	0.291033	0.49372	333	0.732	0.99426
cellular.response.to.drug	-0.0314648	0.423924	0.694339	54	0.436	0.791209		-0.0341603	7.75642e-06	0.000193478	1437	0.032	0.857677
cellular.response.to.electrical.stimulus	0.0567962	0.514206	0.766672	11	NA	NA		0.0184544	0.244433	0.443192	332	0.647	0.993185
cellular.response.to.epidermal.growth.factor.stimulus	-0.0624349	0.166629	0.419932	41	0.23	0.645327		-0.00767896	0.26803	0.469487	1747	0.838	0.994939
cellular.response.to.epinephrine.stimulus	-0.00143087	0.985747	0.998243	13	0.98	0.999241		-0.0484315	0.000107752	0.00163141	534	0.155	0.955333
cellular.response.to.estradiol.stimulus	-0.0545954	0.285168	0.562518	32	0.209	0.63114		-0.00275203	0.750925	0.861214	1114	0.896	0.995485
cellular.response.to.estrogen.stimulus	-0.0656002	0.395386	0.666341	14	0.466	0.816082		-0.0170691	0.173122	0.357962	532	0.598	0.991234
cellular.response.to.ethanol	-0.0190566	0.811946	0.921628	13	0.8	0.949492		-0.0516385	0.000229312	0.002883	425	0.036	0.867951
cellular.response.to.exogenous.dsRNA	-0.0905957	0.209592	0.473726	16	0.397	0.766877		-0.0440478	0.00613678	0.0348635	323	0.154	0.955333
cellular.response.to.extracellular.stimulus	-0.0951947	0.174174	0.428907	17	0.27	0.674805		-0.00650008	0.637404	0.78348	439	0.838	0.994939
cellular.response.to.fatty.acid	0.0161013	0.798391	0.914743	21	0.82	0.954069		-0.00979024	0.425701	0.620095	553	0.753	0.99426
cellular.response.to.fibroblast.growth.factor.stimulus	-0.0104626	0.850746	0.93917	27	0.86	0.966901		0.00731807	0.465184	0.654506	833	0.84	0.994939
cellular.response.to.fluid.shear.stress	0.0535271	0.538715	0.781755	11	NA	NA		-0.0412364	0.00236046	0.0172432	454	0.329	0.980206
cellular.response.to.follicle.stimulating.hormone.stimulus	0.153796	0.0773383	0.271289	11	0.108	0.530481		-0.0243572	0.0204676	0.0852983	757	0.548	0.991234
cellular.response.to.forskolin	0.0895971	0.303471	0.583463	11	NA	NA		-0.0441321	0.000179631	0.00237604	602	0.379	0.980897
cellular.response.to.gamma.radiation	-0.125291	0.0242382	0.13492	27	0.035	0.39712		-0.0245279	0.0600075	0.180008	491	0.353	0.980215
cellular.response.to.glucagon.stimulus	-0.00805995	0.889061	0.957624	25	0.874	0.969886		0.00549565	0.63485	0.781604	624	0.832	0.994939
cellular.response.to.glucocorticoid.stimulus	-0.0660761	0.306309	0.586029	20	0.251	0.658846		-0.00935739	0.453504	0.64528	536	0.718	0.99426
cellular.response.to.glucose.starvation	-0.0231202	0.612919	0.825739	40	0.618	0.892877		-0.01718	0.076721	0.21294	888	0.285	0.978302
cellular.response.to.glucose.stimulus	0.0832985	0.0359686	0.169738	53	0.08	0.494134		-0.0136478	0.0353727	0.126222	1998	0.561	0.991234
cellular.response.to.growth.factor.stimulus	-0.00542983	0.89973	0.964213	45	0.907	0.981161		-0.0044123	0.570774	0.737648	1384	0.881	0.994939
cellular.response.to.heat	-0.00139194	0.971781	0.993405	54	0.979	0.999241		-0.0308474	0.000155129	0.00212639	1260	0.162	0.955333
cellular.response.to.hepatocyte.growth.factor.stimulus	0.0247987	0.739475	0.889607	15	0.684	0.915307		-0.0295944	0.0500283	0.159357	366	0.389	0.984918
cellular.response.to.hormone.stimulus	0.0770457	0.0840912	0.284255	42	0.04	0.407674		-0.050883	3.38924e-11	4.41731e-09	1423	0.029	0.857677
cellular.response.to.hydrogen.peroxide	-0.0222391	0.538489	0.781755	64	0.538	0.852383		-0.0157513	0.0264823	0.102597	1666	0.49	0.991234
cellular.response.to.hypoxia	-0.0528902	0.0625292	0.237002	104	0.101	0.52616		-0.037768	1.39476e-13	2.87804e-11	3242	0.018	0.818372
cellular.response.to.insulin.stimulus	0.0149678	0.633511	0.836321	85	0.617	0.892877		-0.0556928	5.88293e-20	4.18223e-17	2270	0.006	0.747003
cellular.response.to.interferon.alpha	-0.15211	0.0957667	0.305205	10	0.102	0.527451		0.0437502	0.129717	0.297082	100	0.48	0.991234
cellular.response.to.interferon.beta	-0.150636	0.0433812	0.191057	15	0.105	0.529683		-0.0446596	0.0557533	0.171414	153	0.225	0.978302
cellular.response.to.interferon.gamma	-0.017846	0.567462	0.799524	86	0.708	0.921614		0.0207264	0.00803581	0.0423879	1371	0.274	0.978302
cellular.response.to.interleukin.1	-0.0489306	0.143044	0.383024	75	0.376	0.755448		-0.0232685	0.00164114	0.013109	1536	0.411	0.985625
cellular.response.to.interleukin.4	-0.127984	0.0267597	0.142507	25	0.029	0.379381		0.000572149	0.96515	0.982552	487	0.986	0.999685
cellular.response.to.interleukin.6	0.010652	0.88272	0.954422	16	0.875	0.969886		0.0379148	0.000188659	0.002479	811	0.281	0.978302
cellular.response.to.ionizing.radiation	-0.0165112	0.746522	0.893717	32	0.798	0.949492		-0.00308289	0.772081	0.874858	738	0.939	0.995934
cellular.response.to.leptin.stimulus	0.0836151	0.359849	0.637738	10	NA	NA		0.0245162	0.125448	0.290666	326	0.508	0.991234
cellular.response.to.leucine	-0.0244007	0.789309	0.911473	10	NA	NA		-0.0132722	0.525336	0.704774	191	0.667	0.993993
cellular.response.to.leukemia.inhibitory.factor	-0.0699375	0.0204902	0.120384	92	0.056	0.455536		-0.0154213	0.00572611	0.0331199	2707	0.188	0.967898
cellular.response.to.light.stimulus	0.211153	0.00838442	0.069651	13	0.027	0.374158		0.00986763	0.621345	0.771379	209	0.816	0.994939
cellular.response.to.lipopolysaccharide	-0.0825835	0.000658991	0.0110208	143	0.044	0.415806		-0.026552	7.37629e-07	2.75993e-05	2935	0.204	0.973919
cellular.response.to.lipoteichoic.acid	-0.13873	0.128712	0.365647	10	NA	NA		-0.00298089	0.889251	0.943274	182	0.949	0.995934
cellular.response.to.lithium.ion	-0.106235	0.184736	0.444976	13	0.082	0.494134		-0.0272351	0.0600333	0.180008	398	0.467	0.991234
cellular.response.to.low.density.lipoprotein.particle.stimulus	0.0294624	0.683249	0.863516	16	0.652	0.906029		-0.00534188	0.782393	0.879953	223	0.926	0.995934
cellular.response.to.mechanical.stimulus	-0.0771654	0.0209077	0.122648	75	0.335	0.727701		-0.0223574	0.00329439	0.0219252	1449	0.365	0.980796
cellular.response.to.nerve.growth.factor.stimulus	-0.0508155	0.319841	0.600002	32	0.418	0.782223		-0.0183993	0.0262732	0.101995	1222	0.416	0.985625
cellular.response.to.nitric.oxide	-0.0658957	0.39326	0.664084	14	0.371	0.754919		-0.0608927	0.000355223	0.00400266	287	0.051	0.887495
cellular.response.to.nutrient.levels	0.0376082	0.62609	0.833471	14	0.622	0.892877		-0.027655	0.140467	0.312104	237	0.592	0.991234
cellular.response.to.organic.cyclic.compound	-0.0338328	0.427334	0.696883	46	0.53	0.850037		0.0127528	0.112489	0.272073	1298	0.642	0.993185
cellular.response.to.organic.substance	0.0230555	0.695819	0.869603	24	0.695	0.920193		-0.0343004	0.00115051	0.00993043	751	0.4	0.985042
cellular.response.to.osmotic.stress	0.227595	0.0126901	0.0888142	10	0.013	0.292167		-0.0368446	0.0367771	0.129485	268	0.494	0.991234
cellular.response.to.oxidative.stress	0.0205931	0.502119	0.760056	89	0.494	0.832275		-0.00729308	0.218432	0.413794	2398	0.627	0.991544
cellular.response.to.oxidised.low.density.lipoprotein.particle.stimulus	-0.199843	0.0286373	0.147624	10	NA	NA		0.0146876	0.429852	0.624745	241	0.682	0.994068
cellular.response.to.peptide	-0.0102716	0.897961	0.9639	13	0.92	0.985192		-0.0236462	0.138824	0.309862	327	0.506	0.991234
cellular.response.to.peptide.hormone.stimulus	0.00143143	0.983225	0.997294	18	0.986	1		-0.0352681	0.00438893	0.0273914	545	0.216	0.97695
cellular.response.to.platelet.derived.growth.factor.stimulus	-0.0532733	0.433917	0.702858	18	0.329	0.724089		-0.00335973	0.784576	0.880033	553	0.914	0.995797
cellular.response.to.prostaglandin.E.stimulus	-0.0430559	0.563685	0.798162	15	0.645	0.903103		0.0011226	0.929147	0.964803	524	0.957	0.995934
cellular.response.to.reactive.oxygen.species	-0.051081	0.31732	0.597796	32	0.285	0.689234		-0.0316779	0.00124328	0.0105392	869	0.065	0.902063
cellular.response.to.retinoic.acid	-0.0037553	0.919224	0.971422	61	0.929	0.986858		-0.0141849	0.00759826	0.0407456	2990	0.472	0.991234
cellular.response.to.starvation	0.0158643	0.665817	0.854503	62	0.707	0.921614		-0.0279572	0.000132449	0.0018849	1568	0.217	0.97695
cellular.response.to.steroid.hormone.stimulus	-0.096126	0.230098	0.499852	13	0.315	0.711133		0.018282	0.240503	0.439389	344	0.665	0.993993
cellular.response.to.thyroid.hormone.stimulus	-0.0788997	0.343932	0.623295	12	0.428	0.788113		-0.021072	0.131365	0.299628	428	0.594	0.991234
cellular.response.to.transforming.growth.factor.beta.stimulus	0.0167443	0.670449	0.855564	54	0.747	0.936603		-0.0382128	2.00399e-14	4.97626e-12	3390	0.129	0.952057
cellular.response.to.tumor.necrosis.factor	-0.0392984	0.14401	0.384801	116	0.317	0.712894		-0.0152964	0.0072847	0.0396564	2594	0.517	0.991234
cellular.response.to.unfolded.protein	-0.00494742	0.931765	0.975848	25	0.956	0.995171		-0.030173	0.0060071	0.0342637	693	0.341	0.980215
cellular.response.to.UV	-0.0756989	0.0757334	0.267877	46	0.17	0.598927		-0.0358312	3.20292e-05	0.00062617	1128	0.029	0.857677
cellular.response.to.vascular.endothelial.growth.factor.stimulus	-0.044094	0.419351	0.690687	28	0.39	0.764128		-0.034029	9.13021e-05	0.00143083	1107	0.403	0.985625
cellular.response.to.virus	-0.0727564	0.272233	0.546905	19	0.432	0.790676		-0.00941339	0.535861	0.712675	361	0.782	0.99426
cellular.response.to.vitamin.D	0.032978	0.692414	0.868579	12	0.684	0.915307		-0.0334737	0.0256365	0.100189	371	0.17	0.962029
cellular.response.to.X.ray	0.000120766	0.998945	0.999433	10	NA	NA		0.00330683	0.868838	0.932324	208	0.913	0.995797
cellular.response.to.zinc.ion	0.0512915	0.427137	0.696883	20	0.58	0.873493		-0.0125274	0.488562	0.674235	255	0.69	0.994068
cellular.senescence	-0.0741663	0.218229	0.484065	23	0.293	0.693157		-0.0157316	0.169929	0.353463	636	0.662	0.993993
cellular.sodium.ion.homeostasis	-0.118749	0.0900473	0.293666	17	0.082	0.494134		-0.018678	0.245954	0.444604	322	0.693	0.99426
cellular.zinc.ion.homeostasis	-0.00549265	0.92131	0.971422	27	0.94	0.989385		0.00127393	0.934158	0.967506	351	0.965	0.997396
cellular_component	-0.00516124	0.74387	0.890821	341	0.773	0.94102		-0.0046333	0.139753	0.311004	8801	0.758	0.99426
CENP.A.containing.nucleosome.assembly	-0.323373	4.16563e-08	3.30907e-06	24	0.001	0.08765		-0.0286841	0.0454601	0.149306	406	0.3	0.978302
central.nervous.system.development	0.00678118	0.785764	0.910674	135	0.861	0.966901		-0.000927853	0.812973	0.897407	5552	0.957	0.995934
central.nervous.system.myelination	-0.0444331	0.564846	0.79828	14	0.562	0.87146		0.025838	0.122564	0.286155	298	0.637	0.99309
central.nervous.system.neuron.development	0.0201878	0.801011	0.915903	13	0.801	0.950357		-0.00246541	0.846345	0.917929	516	0.928	0.995934
centriolar.satellite	-0.0253117	0.642959	0.84265	28	0.699	0.921314		0.00335033	0.738561	0.853347	830	0.917	0.995934
centriole	-0.0790475	0.0026909	0.0321643	121	0.118	0.539385		-0.0158616	0.00591812	0.0339599	2537	0.386	0.984478
centriole.replication	-0.160086	0.026618	0.142348	16	0.074	0.489517		-0.0246206	0.125587	0.290817	323	0.35	0.980215
centrosome	-0.094031	4.39244e-11	5.58279e-09	420	0	0		-0.017739	2.52581e-09	2.05749e-07	9825	0.27	0.978302
centrosome.cycle	-0.187855	6.15582e-05	0.00189291	38	0.001	0.08765		-0.0108709	0.257941	0.457912	906	0.568	0.991234
centrosome.duplication	-0.137022	0.066143	0.244858	15	0.155	0.575667		-0.0195855	0.342397	0.545247	196	0.555	0.991234
centrosome.localization	0.0440383	0.568309	0.799524	14	0.574	0.872321		0.109825	1.03996e-11	1.50601e-09	320	0.036	0.867951
ceramide.biosynthetic.process	0.0722346	0.170914	0.424556	30	0.358	0.744895		-0.0206144	0.14806	0.323326	411	0.397	0.985042
ceramide.metabolic.process	-0.0788169	0.260539	0.53283	17	0.34	0.730417		-0.0391208	0.0475311	0.153974	214	0.254	0.978302
cerebellar.Purkinje.cell.layer.development	-0.0206539	0.821063	0.927517	10	0.841	0.962005		0.0338376	0.0305457	0.113991	341	0.458	0.99075
cerebellum.development	0.0398906	0.359996	0.637738	44	0.425	0.786306		-0.00313762	0.64929	0.792098	1764	0.845	0.994939
cerebral.cortex.development	0.0301355	0.408245	0.68036	63	0.533	0.851731		-0.00409676	0.480709	0.667933	2496	0.784	0.99426
cerebral.cortex.neuron.differentiation	-0.0820213	0.346187	0.625721	11	NA	NA		-0.0168602	0.279752	0.482177	343	0.633	0.991698
cGMP.binding	0.0487235	0.513512	0.766672	15	0.564	0.872247		-0.0385775	0.00163209	0.01305	557	0.118	0.952057
cGMP.biosynthetic.process	0.0762695	0.403597	0.674668	10	0.419	0.782223		0.00247066	0.907614	0.952781	184	0.939	0.995934
cGMP.mediated.signaling	0.0483276	0.432638	0.70168	22	0.508	0.840513		-0.0311852	0.00523545	0.0310278	670	0.199	0.971127
channel.activity	-0.0136446	0.875475	0.951629	11	0.863	0.9681		-0.0523894	0.00287964	0.0198373	270	0.192	0.971127
chaperone.binding	-0.00985869	0.738656	0.889607	96	0.794	0.948795		-0.017866	0.010757	0.0530343	1711	0.464	0.991234
chaperone.cofactor.dependent.protein.refolding	0.0123699	0.823948	0.929514	27	0.883	0.973215		-0.0149471	0.249835	0.448819	495	0.612	0.991234
chaperone.mediated.protein.complex.assembly	-0.0957981	0.198916	0.461635	15	0.116	0.533722		-0.0581404	0.00177807	0.0139814	241	0.053	0.887495
chaperone.mediated.protein.folding	0.107605	0.0878152	0.290597	21	0.03	0.381087		-0.02068	0.116913	0.277594	480	0.529	0.991234
chaperonin.containing.T.complex	-0.000344182	0.996993	0.999383	10	NA	NA		0.047616	0.0301043	0.112855	173	0.194	0.971127
chemical.synaptic.transmission	0.121473	1.9636e-10	2.33975e-08	232	0.003	0.156985		0.00324814	0.344618	0.547191	7285	0.779	0.99426
chemoattractant.activity	-0.0767608	0.14565	0.387282	30	0.186	0.610024		-0.00741133	0.498241	0.682433	698	0.771	0.99426
chemokine.activity	-0.103116	0.0179718	0.110855	44	0.171	0.598927		0.0141449	0.425341	0.619918	265	0.747	0.99426
chemokine.binding	-0.174353	0.00567598	0.0553516	21	0.124	0.545766		-0.0236028	0.169251	0.352658	283	0.551	0.991234
chemokine.mediated.signaling.pathway	-0.101855	0.00518783	0.0517832	63	0.149	0.569156		0.0380511	0.00966637	0.0489738	386	0.259	0.978302
chemokine.receptor.activity	-0.126524	0.0897573	0.293666	15	0.321	0.717694		0.0545316	0.11667	0.277396	69	0.183	0.966137
chemorepellent.activity	0.117182	0.0350741	0.166547	27	0.104	0.527676		-0.00643577	0.31238	0.514927	2072	0.819	0.994939
chemotaxis	-0.0704801	0.0107082	0.0804765	110	0.175	0.60152		-0.0208235	0.00532798	0.0314333	1502	0.362	0.980796
chloride.channel.activity	0.0144554	0.731749	0.887569	47	0.807	0.950978		0.000143386	0.989405	0.994762	717	0.995	0.999685
chloride.channel.complex	0.0651613	0.134847	0.372937	44	0.216	0.634783		0.00196247	0.835399	0.910702	938	0.929	0.995934
chloride.channel.inhibitor.activity	0.144563	0.113404	0.337029	10	NA	NA		-0.0024699	0.891385	0.943763	255	0.958	0.995934
chloride.ion.binding	0.108955	0.173744	0.428515	13	0.186	0.610024		0.0118979	0.580438	0.744896	180	0.622	0.991544
chloride.ion.homeostasis	0.232142	0.00767269	0.0671009	11	0.001	0.08765		-0.057988	0.000950138	0.00861958	271	0.016	0.815583
chloride.transmembrane.transport	0.0803873	0.010907	0.0813865	84	0.045	0.41628		-0.0133956	0.0636165	0.186812	1609	0.425	0.987961
chloride.transmembrane.transporter.activity	0.134801	0.0706574	0.255371	15	0.197	0.625052		8.76724e-05	0.995933	0.998117	282	0.996	0.999685
chloride.transport	0.0835384	0.107469	0.325311	31	0.214	0.633686		0.000128025	0.991315	0.995516	604	0.994	0.999685
cholesterol.binding	0.0549564	0.183317	0.442678	49	0.236	0.651509		-0.00561171	0.545116	0.719462	973	0.851	0.994939
cholesterol.biosynthetic.process	0.165985	0.000335187	0.00635854	39	0.082	0.494134		0.00889122	0.508383	0.69032	462	0.762	0.99426
cholesterol.catabolic.process	0.0590372	0.461084	0.728163	13	0.571	0.872314		0.00144255	0.934476	0.967506	271	0.97	0.998473
cholesterol.efflux	0.0703379	0.253428	0.525746	22	0.456	0.805815		-0.00846939	0.601669	0.75822	317	0.804	0.99426
cholesterol.homeostasis	0.0224877	0.50375	0.761014	74	0.71	0.921614		-0.0355759	6.12651e-09	4.51008e-07	2247	0.107	0.952057
cholesterol.metabolic.process	0.031437	0.373701	0.648577	67	0.511	0.841901		0.0128115	0.0998683	0.251723	1383	0.6	0.991234
cholesterol.transport	0.0184967	0.780148	0.90809	19	0.822	0.954598		-0.0238515	0.0942188	0.242605	411	0.335	0.980215
cholinergic.synapse	0.191263	0.0362171	0.170137	10	0.097	0.522399		-0.0119502	0.481868	0.668715	289	0.794	0.99426
chondrocyte.development	0.118697	0.0901869	0.293666	17	0.123	0.543121		-0.00300739	0.778247	0.877899	733	0.901	0.995797
chondrocyte.differentiation	-0.0436098	0.400738	0.671767	31	0.434	0.791209		-0.0135138	0.0456137	0.149686	1838	0.5	0.991234
chondroitin.sulfate.biosynthetic.process	0.0424402	0.453838	0.72254	26	0.569	0.872314		-0.00625594	0.577102	0.742009	664	0.842	0.994939
chondroitin.sulfate.catabolic.process	-0.00300693	0.968925	0.992991	14	0.978	0.999241		-0.0419966	0.00987285	0.0498423	315	0.299	0.978302
chromatin	-0.150616	1.2124e-06	7.00438e-05	87	0.01	0.263609		-0.0240982	0.000115585	0.00172196	2153	0.308	0.97849
chromatin.binding	-0.0634141	4.23529e-05	0.00137627	355	0.116	0.533722		-0.0102407	5.51324e-05	0.000966671	13742	0.562	0.991234
chromatin.DNA.binding	-0.0258339	0.458209	0.72707	69	0.624	0.892877		-0.0396	1.42187e-10	1.62894e-08	2207	0.083	0.940415
chromatin.mediated.maintenance.of.transcription	-0.054257	0.552406	0.790243	10	NA	NA		-0.00518193	0.70552	0.830585	444	0.878	0.994939
chromatin.organization	-0.0953481	0.000494751	0.0087284	112	0.036	0.401962		-0.0372686	7.47624e-11	9.06422e-09	2572	0.036	0.867951
chromatin.remodeling	-0.0541129	0.0670602	0.247054	96	0.399	0.767835		-0.0227946	4.517e-06	0.00012729	3424	0.105	0.952057
chromatin.silencing	-0.0101097	0.875624	0.951629	20	0.892	0.977782		-0.0394929	0.00224474	0.0165925	500	0.274	0.978302
chromatoid.body	-0.0744423	0.352686	0.632817	13	0.595	0.881314		0.00955904	0.656978	0.797387	180	0.836	0.994939
chromocenter	-0.242696	0.00531403	0.0527666	11	0.03	0.381087		-0.0136884	0.286664	0.488762	506	0.658	0.993993
chromosome	-0.135402	9.44412e-07	5.76056e-05	110	0.004	0.171024		-0.0385159	2.89567e-08	1.67116e-06	1742	0.08	0.93234
chromosome..centromeric.region	-0.246423	3.51792e-09	3.35346e-07	48	0.001	0.08765		0.00564845	0.515104	0.695401	1112	0.742	0.99426
chromosome..telomeric.region	-0.19436	4.3002e-05	0.00137627	37	0.01	0.263609		-0.0169399	0.0849544	0.227515	865	0.615	0.991234
chromosome.condensation	0.0864755	0.191905	0.453087	19	0.197	0.625052		-0.0822536	7.16359e-08	3.75968e-06	358	0.015	0.815583
chromosome.organization	-0.252612	0.0024443	0.0298528	12	0.029	0.379381		-0.0231851	0.180792	0.367649	278	0.369	0.980796
chromosome.segregation	-0.197155	1.63708e-07	1.20042e-05	59	0.003	0.156985		0.00148166	0.856842	0.924718	1242	0.947	0.995934
chylomicron	0.0277644	0.739103	0.889607	12	0.816	0.951096		0.0403238	0.0882826	0.233078	149	0.521	0.991234
ciliary.basal.body	-0.0353863	0.204188	0.467008	108	0.536	0.851866		0.00488557	0.359476	0.561042	2970	0.619	0.991544
ciliary.basal.body.plasma.membrane.docking	-0.136155	1.62008e-05	0.000605623	84	0.002	0.13749		-0.0131993	0.0472232	0.153091	1899	0.46	0.991234
ciliary.base	-0.0207483	0.709035	0.876637	27	0.745	0.93644		0.0144378	0.164805	0.346989	774	0.519	0.991234
ciliary.membrane	0.0184795	0.6513	0.849609	50	0.848	0.963923		-0.0195361	0.0364946	0.128872	959	0.386	0.984478
ciliary.rootlet	-0.030602	0.737537	0.889607	10	0.744	0.936276		-0.0435468	0.00746185	0.0402703	315	0.202	0.972086
ciliary.tip	0.0470962	0.290999	0.567849	42	0.666	0.910316		-0.0151182	0.0740913	0.207892	1169	0.521	0.991234
ciliary.transition.zone	-0.095736	0.111985	0.334377	23	0.271	0.674805		-0.0299604	0.0188708	0.0805071	513	0.463	0.991234
cilium	-0.0126799	0.56773	0.799524	171	0.809	0.950978		-0.0163994	0.000359491	0.00403886	4015	0.27	0.978302
cilium.assembly	-0.0526666	0.0233361	0.13124	156	0.342	0.731575		-0.0312404	1.11658e-11	1.60214e-09	4007	0.001	0.401026
cilium.dependent.cell.motility	-0.13132	0.0782398	0.271861	15	0.365	0.750992		-0.00575313	0.662709	0.800991	480	0.867	0.994939
cilium.movement	-0.19424	0.000988187	0.0150718	24	0.158	0.578838		0.028327	0.00666587	0.0369172	767	0.332	0.980206
cilium.movement.involved.in.cell.motility	-0.147237	0.106881	0.324215	10	0.398	0.767835		0.00526053	0.780539	0.879602	234	0.877	0.994939
cilium.organization	-0.165172	0.0475591	0.199862	12	0.138	0.554849		-0.00238904	0.880582	0.938488	330	0.958	0.995934
circadian.regulation.of.gene.expression	-0.00954055	0.803298	0.91695	57	0.816	0.951096		-0.0123728	0.0352849	0.126023	2438	0.531	0.991234
circadian.rhythm	0.0089549	0.788676	0.911473	75	0.807	0.950978		-0.00400186	0.495346	0.6797	2445	0.829	0.994939
cis.Golgi.network	0.00702997	0.866214	0.946925	48	0.898	0.979153		-0.0246021	0.0024653	0.0178146	1269	0.147	0.955333
class.I.DNA..apurinic.or.apyrimidinic.site..endonuclease.activity	-0.179775	0.0489898	0.204823	10	NA	NA		0.0267549	0.258074	0.458004	149	0.552	0.991234
clathrin.binding	0.119146	0.0110451	0.0819358	38	0.04	0.407674		0.00374277	0.66737	0.804571	1104	0.878	0.994939
clathrin.coat.assembly	0.105484	0.132121	0.369168	17	0.149	0.569156		-0.0698094	5.79871e-06	0.000155561	352	0.002	0.638367
clathrin.coated.endocytic.vesicle	0.0825493	0.190345	0.450799	21	0.232	0.646062		-0.0510463	0.000132633	0.0018858	468	0.209	0.97695
clathrin.coated.endocytic.vesicle.membrane	0.08646	0.0957195	0.305205	31	0.57	0.872314		-0.00178496	0.873306	0.93481	667	0.943	0.995934
clathrin.coated.pit	0.052826	0.205532	0.468686	48	0.287	0.689234		-0.0213412	0.0105124	0.0521123	1204	0.485	0.991234
clathrin.coated.vesicle	0.165298	4.44934e-05	0.00140209	51	0.006	0.23636		-0.0206238	0.000689552	0.00675303	2279	0.376	0.980897
clathrin.coated.vesicle.membrane	0.0292303	0.465999	0.732119	52	0.66	0.908861		0.00157462	0.823775	0.90392	1679	0.94	0.995934
clathrin.dependent.endocytosis	0.000368053	0.995232	0.999237	22	0.993	1		-0.0605768	3.01604e-05	0.0005971	396	0.051	0.887495
cleavage.furrow	0.0119704	0.801085	0.915903	37	0.79	0.948795		-0.00882481	0.299843	0.502655	1156	0.752	0.99426
co.receptor.binding	-0.0768418	0.337383	0.615602	13	0.462	0.811103		-0.0163975	0.191907	0.381328	529	0.673	0.993993
co.SMAD.binding	-0.0895206	0.326927	0.605165	10	NA	NA		-0.0172748	0.255914	0.455436	361	0.731	0.99426
cobalamin.metabolic.process	0.0899621	0.174598	0.42951	19	0.296	0.69556		0.00959335	0.598015	0.756344	252	0.706	0.99426
cochlea.development	0.0043287	0.933527	0.976554	31	0.957	0.995325		-0.00696797	0.35987	0.561489	1448	0.696	0.99426
cochlea.morphogenesis	0.0811	0.178187	0.434138	23	0.184	0.610024		0.00752831	0.364801	0.565628	1214	0.768	0.99426
coenzyme.A.biosynthetic.process	0.115078	0.2076	0.47127	10	NA	NA		0.0519564	0.0280741	0.107486	149	0.352	0.980215
coenzyme.binding	0.0603647	0.508585	0.762953	10	NA	NA		0.0394939	0.0017063	0.0135389	527	0.633	0.991698
cofactor.binding	0.0980269	0.149905	0.392034	18	0.208	0.630837		0.0293935	0.00524871	0.0310711	754	0.643	0.993185
cognition	0.0690622	0.126034	0.360245	41	0.136	0.553793		-0.0410107	1.07259e-06	3.83874e-05	1185	0.022	0.84958
collagen.activated.tyrosine.kinase.receptor.signaling.pathway	-0.103237	0.258255	0.531137	10	0.514	0.844977		-0.0122916	0.537399	0.714218	210	0.803	0.99426
collagen.binding	0.0493968	0.193308	0.455228	58	0.418	0.782223		0.0114848	0.106289	0.262594	1660	0.523	0.991234
collagen.catabolic.process	-0.00119624	0.979117	0.995454	40	0.988	1		-0.0114127	0.257573	0.457518	823	0.627	0.991544
collagen.containing.extracellular.matrix	0.0768784	2.38622e-06	0.000122955	320	0.083	0.494134		-0.0120377	0.00035068	0.00396002	7599	0.206	0.975145
collagen.fibril.organization	0.111636	0.0104155	0.0787986	44	0.119	0.541134		0.0108845	0.191561	0.380832	1206	0.614	0.991234
collagen.metabolic.process	0.113691	0.191641	0.452743	11	0.274	0.67938		-0.0161918	0.255337	0.454889	412	0.5	0.991234
collagen.trimer	0.125231	0.000796233	0.0129193	60	0.013	0.292167		0.0215648	0.00495031	0.0296866	1424	0.176	0.962125
commissural.neuron.axon.guidance	0.107039	0.199155	0.461853	12	0.304	0.702587		0.0138661	0.136688	0.307087	964	0.564	0.991234
complement.activation	-0.0698004	0.209353	0.473669	27	0.529	0.849599		0.0197049	0.17802	0.364432	390	0.437	0.989697
complement.activation..alternative.pathway	-0.131809	0.0998455	0.311341	13	0.4	0.767835		0.0276394	0.202904	0.39436	177	0.395	0.985042
complement.activation..classical.pathway	-0.0528138	0.279615	0.557039	35	0.643	0.903103		0.0424118	0.00313606	0.0211322	405	0.141	0.952057
complement.activation..lectin.pathway	0.0750906	0.38846	0.660229	11	0.484	0.826951		-0.0120106	0.577915	0.74269	179	0.652	0.993185
complement.receptor.mediated.signaling.pathway	-0.156984	0.0596908	0.230599	12	0.144	0.563464		-0.020387	0.515056	0.695396	85	0.637	0.99309
condensed.chromosome	-0.18845	0.00221467	0.0276788	22	0.014	0.293916		-0.0231902	0.0832029	0.224086	466	0.604	0.991234
condensed.nuclear.chromosome	-0.0323583	0.575464	0.801405	25	0.608	0.890018		-0.0335448	0.00575987	0.033266	566	0.112	0.952057
connexin.complex	0.0441152	0.494609	0.754356	20	0.616	0.892877		0.00795113	0.590171	0.752504	383	0.852	0.994939
COP9.signalosome	-0.0993152	0.215004	0.479944	13	NA	NA		-0.0194336	0.290307	0.492986	247	0.512	0.991234
COPI.vesicle.coat	0.0891579	0.305847	0.585977	11	0.359	0.745648		-0.0402759	0.00650722	0.0363865	381	0.331	0.980206
COPII.coated.ER.to.Golgi.transport.vesicle	-0.00367956	0.93827	0.97798	37	0.93	0.986858		-0.036545	0.00165845	0.0132269	619	0.229	0.978302
COPII.vesicle.coat	0.0915841	0.235414	0.505424	14	0.413	0.780581		-0.0423527	0.0242778	0.0963327	236	0.305	0.978302
COPII.vesicle.coating	0.0300346	0.432963	0.701909	57	0.392	0.764378		-0.035651	2.45459e-05	0.000502854	1173	0.277	0.978302
copper.ion.binding	0.00449773	0.910686	0.969754	52	0.929	0.986858		-0.0104367	0.315622	0.517706	773	0.563	0.991234
copper.ion.transport	0.0727228	0.346106	0.625721	14	0.514	0.844977		-0.0027488	0.934727	0.967506	74	0.941	0.995934
coreceptor.activity	-0.0926015	0.0743736	0.264293	31	0.282	0.688025		-0.012508	0.179893	0.366539	962	0.624	0.991544
cornification	0.328484	6.65455e-33	2.53738e-30	111	0	0		0.053615	4.54415e-06	0.000127825	611	0.065	0.902063
cornified.envelope	0.255	2.6001e-12	3.81314e-10	63	0.014	0.293916		0.0504225	0.000305953	0.00356565	428	0.09	0.952057
coronary.vasculature.development	-0.0501282	0.405302	0.676924	23	0.554	0.865949		-0.0244922	0.00234814	0.0171692	1293	0.403	0.985625
corpus.callosum.development	0.0794215	0.384448	0.656471	10	NA	NA		-0.00077848	0.950646	0.97564	528	0.988	0.999685
cortical.actin.cytoskeleton	0.105426	0.0227294	0.12968	39	0.04	0.407674		0.00551627	0.57198	0.738109	878	0.816	0.994939
cortical.actin.cytoskeleton.organization	0.163017	0.00478261	0.0488904	25	0.004	0.171024		-0.011635	0.221941	0.417766	922	0.639	0.993185
cortical.cytoskeleton	0.0938382	0.156755	0.404358	19	0.309	0.707612		-0.0114474	0.444736	0.637535	372	0.851	0.994939
costamere	0.120149	0.0775947	0.271861	18	0.199	0.627064		-0.0370633	5.05058e-05	0.000898648	1001	0.096	0.952057
cristae.formation	-0.0201746	0.816768	0.924409	11	0.815	0.951096		0.0325304	0.0319279	0.117274	363	0.402	0.985467
Cul2.RING.ubiquitin.ligase.complex	-0.0950364	0.254291	0.526682	12	0.474	0.820883		-0.0283104	0.0597879	0.179479	369	0.406	0.985625
Cul3.RING.ubiquitin.ligase.complex	0.0168037	0.750083	0.895017	30	0.835	0.959839		-0.0207502	0.0830268	0.224017	583	0.325	0.980206
Cul4.RING.E3.ubiquitin.ligase.complex	-0.120353	0.0457152	0.196077	23	0.156	0.576329		-0.0452217	0.00105524	0.00928228	438	0.037	0.868455
cullin.family.protein.binding	-0.0162512	0.833243	0.933074	14	0.867	0.968675		-0.0488876	0.0124453	0.0591625	218	0.251	0.978302
cullin.RING.ubiquitin.ligase.complex	-0.142325	0.102132	0.314248	11	NA	NA		-0.0393917	0.0992938	0.250925	146	0.226	0.978302
cyclin.binding	-0.0204639	0.712844	0.878398	27	0.746	0.93644		-0.0217678	0.00799201	0.0422313	1244	0.284	0.978302
cyclin.dependent.protein.kinase.holoenzyme.complex	-0.138525	0.011181	0.0824629	28	0.108	0.530481		-0.0671491	1.98788e-09	1.65375e-07	667	0.023	0.856986
cyclin.dependent.protein.serine.threonine.kinase.activity	0.0281194	0.606563	0.821488	28	0.656	0.907273		-0.0502785	2.39687e-07	1.07722e-05	883	0.014	0.815583
cyclin.dependent.protein.serine.threonine.kinase.inhibitor.activity	-0.138746	0.096052	0.305205	12	0.222	0.636412		0.00600287	0.788836	0.882911	166	0.877	0.994939
cyclin.dependent.protein.serine.threonine.kinase.regulator.activity	-0.128159	0.0169126	0.106945	29	0.135	0.553579		-0.0360966	0.00564371	0.0327524	491	0.153	0.955333
cyclooxygenase.pathway	0.0334219	0.714367	0.878899	10	0.747	0.936603		-0.0477618	0.0291367	0.110339	174	0.404	0.985625
cyclosporin.A.binding	0.121369	0.145432	0.386973	12	NA	NA		-0.0228889	0.0295167	0.111292	756	0.4	0.985042
cysteine.type.endopeptidase.activator.activity.involved.in.apoptotic.process	-0.175008	0.0357929	0.169328	12	0.132	0.55118		-0.0189356	0.439453	0.633253	139	0.677	0.993993
cysteine.type.endopeptidase.activity	-0.046871	0.18804	0.447743	66	0.359	0.745648		-0.0245058	0.00710361	0.038928	1010	0.283	0.978302
cysteine.type.endopeptidase.activity.involved.in.apoptotic.process	-0.0631505	0.448745	0.717428	12	0.625	0.892877		-0.00752022	0.805903	0.893167	89	0.909	0.995797
cysteine.type.endopeptidase.inhibitor.activity	0.0323585	0.532952	0.777112	31	0.656	0.907273		-0.00628135	0.709729	0.833094	293	0.896	0.995485
cysteine.type.endopeptidase.inhibitor.activity.involved.in.apoptotic.process	-0.0334275	0.570812	0.799972	24	0.576	0.872712		-0.0548649	3.50452e-05	0.000673351	475	0.061	0.902063
cysteine.type.peptidase.activity	-0.00388684	0.945309	0.981507	26	0.948	0.99185		-0.0519269	0.000163521	0.00219903	440	0.1	0.952057
cytidine.deaminase.activity	0.0685647	0.452749	0.721108	10	NA	NA		-0.107056	0.00153465	0.0124815	73	0.172	0.962125
cytidine.deamination	0.0685647	0.452749	0.721108	10	NA	NA		-0.107056	0.00153465	0.0124815	73	0.172	0.962125
cytidine.to.uridine.editing	0.0720941	0.429826	0.699032	10	NA	NA		-0.0742464	0.0090628	0.0464881	103	0.198	0.971127
cytochrome.c.oxidase.activity	-0.0672353	0.383714	0.656471	14	0.411	0.77848		-0.0445974	0.00729682	0.0397085	302	0.055	0.888636
cytokine.activity	-0.0948918	2.80685e-05	0.000981884	164	0.048	0.426046		-0.0220127	2.56565e-05	0.000521126	3088	0.312	0.979216
cytokine.binding	-0.216443	3.90248e-06	0.000190771	38	0.017	0.315354		-0.00203591	0.814918	0.89819	1107	0.939	0.995934
cytokine.mediated.signaling.pathway	-0.086692	1.08138e-06	6.44265e-05	268	0.065	0.471822		-0.0215261	7.88028e-08	4.0946e-06	5308	0.361	0.980215
cytokine.production	-0.131849	0.0199642	0.119249	26	0.022	0.345883		-0.0192341	0.149886	0.326311	468	0.552	0.991234
cytokine.receptor.activity	-0.325455	2.9432e-13	4.91162e-11	42	0	0		-0.00958352	0.396556	0.592373	654	0.761	0.99426
cytokine.receptor.binding	-0.130064	0.135232	0.373251	11	0.308	0.707612		-0.121515	0.000323206	0.00373059	73	0.017	0.815583
cytolysis	-0.0476695	0.471919	0.735962	19	0.697	0.920341		0.0310908	0.0826245	0.223459	260	0.266	0.978302
cytoplasm	-0.00137564	0.794798	0.913096	3894	0.903	0.980464		-0.0147133	7.74531e-32	1.78591e-28	82838	0.199	0.971127
cytoplasmic.dynein.complex	0.00725789	0.917481	0.971422	17	0.922	0.986129		-0.0381322	0.00447589	0.0277459	464	0.24	0.978302
cytoplasmic.exosome..RNase.complex.	0.173254	0.0466108	0.197718	11	0.128	0.550636		0.0553874	0.0176693	0.0764869	153	0.257	0.978302
cytoplasmic.microtubule	-0.0113582	0.81106	0.921231	37	0.763	0.940935		-0.0489572	3.93226e-07	1.65324e-05	898	0.034	0.857677
cytoplasmic.microtubule.organization	-0.0225992	0.620945	0.829867	40	0.552	0.864751		-0.0271276	0.00744266	0.0401806	814	0.209	0.97695
cytoplasmic.mRNA.processing.body.assembly	0.0802548	0.37948	0.655027	10	NA	NA		-0.0627271	0.00406054	0.0259	175	0.137	0.952057
cytoplasmic.ribonucleoprotein.granule	-0.0769566	0.0426995	0.190425	58	0.076	0.492525		-0.0367174	8.80628e-07	3.2105e-05	1504	0.072	0.903031
cytoplasmic.sequestering.of.transcription.factor	-0.14288	0.100804	0.312042	11	0.132	0.55118		-0.0262511	0.0982791	0.249689	331	0.613	0.991234
cytoplasmic.side.of.plasma.membrane	0.0590473	0.144715	0.385697	51	0.151	0.570481		-0.0223221	0.0138739	0.0642594	1017	0.336	0.980215
cytoplasmic.stress.granule	-0.0138426	0.717803	0.879721	57	0.821	0.954069		-0.0224978	0.00479942	0.0291167	1317	0.38	0.981374
cytoplasmic.translation	-0.00274597	0.96286	0.990093	24	0.976	0.999241		-0.0358254	0.0064935	0.0363487	482	0.31	0.979216
cytoplasmic.vesicle	0.0166059	0.389396	0.661318	227	0.563	0.87224		-0.0181449	5.25873e-06	0.000143788	5375	0.373	0.980897
cytoplasmic.vesicle.membrane	0.0795378	0.00253092	0.0304954	121	0.02	0.343725		-0.00796335	0.123844	0.287974	3155	0.719	0.99426
cytoskeletal.adaptor.activity	0.117097	0.143764	0.384412	13	0.073	0.489517		0.0574203	0.000361361	0.00405138	322	0.212	0.97695
cytoskeletal.anchoring.at.plasma.membrane	0.249158	0.00636271	0.0593479	10	NA	NA		-0.0323349	0.0327323	0.119581	364	0.217	0.97695
cytoskeletal.protein.binding	0.0881405	0.00877809	0.071574	74	0.063	0.468443		-0.00186568	0.724301	0.843127	3018	0.887	0.994939
cytoskeleton	0.0194355	0.225295	0.492856	331	0.309	0.707612		-0.00841802	0.00474386	0.0288805	9794	0.523	0.991234
cytoskeleton.dependent.intracellular.transport	0.014754	0.843163	0.936933	15	0.814	0.950978		-0.038996	0.0262505	0.101977	271	0.298	0.978302
cytoskeleton.organization	0.052429	0.0362763	0.170137	134	0.057	0.457304		-0.0142264	0.00158901	0.0128236	4182	0.429	0.989697
cytosol	0.0185274	0.000222113	0.00462795	4571	0.233	0.647818		-0.0167889	5.59096e-42	1.74885e-38	88313	0.235	0.978302
cytosolic.large.ribosomal.subunit	-0.0411053	0.368409	0.642608	40	0.432	0.790676		-0.0260956	0.00959046	0.0486838	824	0.446	0.99065
cytosolic.small.ribosomal.subunit	-0.0291382	0.726698	0.884988	12	NA	NA		-0.0243632	0.0289171	0.109693	672	0.402	0.985467
damaged.DNA.binding	-0.117603	0.00306644	0.0354313	53	0.037	0.402863		0.00151483	0.869464	0.932611	985	0.939	0.995934
deacetylase.activity	-0.0385591	0.643703	0.842871	12	0.678	0.912097		0.0105405	0.282118	0.484499	871	0.815	0.994939
death.receptor.binding	-0.0934068	0.226224	0.494369	14	0.53	0.850037		-0.0586781	0.00415444	0.0262952	199	0.211	0.97695
decidualization	-0.0757956	0.218444	0.484259	22	0.2	0.627064		-0.0446476	0.000874089	0.00805109	464	0.247	0.978302
defense.response.to.bacterium	-0.11747	2.29239e-05	0.00084863	109	0.113	0.533722		-0.0106924	0.186856	0.375151	1277	0.615	0.991234
defense.response.to.fungus	0.0422368	0.483189	0.745854	23	0.648	0.904325		-0.00978858	0.639476	0.785348	191	0.822	0.994939
defense.response.to.Gram.negative.bacterium	-0.0837646	0.0169491	0.106998	68	0.258	0.662673		0.0236522	0.0246955	0.09751	754	0.36	0.980215
defense.response.to.Gram.positive.bacterium	-0.00648799	0.842044	0.936814	79	0.912	0.982498		-0.00485822	0.609673	0.764106	924	0.876	0.994939
defense.response.to.protozoan	-0.128389	0.0330546	0.160149	23	0.083	0.494134		-0.0434444	0.0149084	0.0674483	262	0.27	0.978302
defense.response.to.virus	-0.0520769	0.0163753	0.105116	179	0.369	0.753474		-0.0138625	0.0214006	0.0878955	2319	0.53	0.991234
definitive.hemopoiesis	0.0313935	0.663724	0.854503	16	0.714	0.921614		-0.0463283	2.27405e-06	7.25839e-05	871	0.052	0.887495
delayed.rectifier.potassium.channel.activity	0.16374	0.00271067	0.0322415	28	0.082	0.494134		0.0202411	0.0413033	0.139672	850	0.348	0.980215
dendrite	0.0603247	4.96213e-05	0.00155087	386	0.1	0.525637		0.00203347	0.427986	0.62267	13446	0.868	0.994939
dendrite.cytoplasm	0.0726701	0.199645	0.462202	26	0.283	0.689234		-0.0254777	0.00502238	0.0300267	1015	0.166	0.955333
dendrite.development	0.0448416	0.358629	0.637738	35	0.336	0.728885		-0.00487849	0.459832	0.650219	1929	0.824	0.994939
dendrite.membrane	-0.0105935	0.8489	0.938491	27	0.883	0.973215		-0.0117038	0.324941	0.52768	591	0.654	0.993643
dendrite.morphogenesis	0.120778	0.0148088	0.0982015	34	0.042	0.412471		0.0278562	0.000221712	0.00281459	1474	0.119	0.952057
dendrite.self.avoidance	-0.00296927	0.967198	0.992713	16	0.97	0.998486		0.00870073	0.398021	0.593823	789	0.872	0.994939
dendritic.cell.chemotaxis	-0.103184	0.152995	0.398477	16	0.215	0.63397		-0.0440406	0.010055	0.0504686	285	0.036	0.867951
dendritic.cell.differentiation	-0.125362	0.132644	0.369715	12	0.126	0.546728		-0.111114	2.2624e-07	1.02562e-05	181	0.008	0.749222
dendritic.shaft	0.0674361	0.180056	0.437016	33	0.349	0.73357		0.00601105	0.3885	0.585622	1728	0.803	0.99426
dendritic.spine	0.0429489	0.0796235	0.274755	140	0.34	0.730417		-0.0155722	3.89978e-05	0.000731326	5969	0.443	0.99065
dendritic.spine.development	0.0563486	0.465371	0.732038	14	0.636	0.899119		0.0608034	2.29736e-08	1.37348e-06	706	0.128	0.952057
dendritic.spine.maintenance	-0.105842	0.246433	0.518031	10	NA	NA		-0.00550496	0.721473	0.841011	350	0.818	0.994939
dendritic.spine.membrane	0.110071	0.186723	0.447316	12	0.424	0.7857		-0.00911039	0.514701	0.695157	427	0.796	0.99426
dendritic.spine.morphogenesis	-0.00463545	0.947241	0.981507	17	0.957	0.995325		0.0168126	0.0811934	0.220923	900	0.615	0.991234
dense.core.granule	0.175038	0.0443984	0.193034	11	0.083	0.494134		0.0457117	0.000917629	0.00836347	439	0.275	0.978302
dentate.gyrus.development	0.057234	0.442782	0.711773	15	0.566	0.872262		-0.0318251	0.00111961	0.00970662	877	0.258	0.978302
dephosphorylation	0.033325	0.312205	0.591082	77	0.4	0.767835		-0.03209	6.39825e-06	0.000168182	1660	0.077	0.918596
dermatan.sulfate.biosynthetic.process	-0.0435463	0.601426	0.818087	12	0.568	0.872314		-0.00833678	0.606806	0.762188	318	0.731	0.99426
desmosome	0.265846	6.53933e-06	0.000289936	24	0.003	0.156985		0.0256143	0.121481	0.284867	305	0.261	0.978302
detection.of.calcium.ion	0.114679	0.209178	0.473631	10	NA	NA		0.00798192	0.516813	0.696927	551	0.74	0.99426
detection.of.chemical.stimulus.involved.in.sensory.perception.of.bitter.taste	0.0230276	0.618793	0.828989	39	0.816	0.951096		0.000774136	0.963976	0.982188	284	0.99	0.999685
detection.of.chemical.stimulus.involved.in.sensory.perception.of.smell	0.301463	4.21097e-87	8.02821e-84	367	0.045	0.41628		-0.0141183	3.4578e-13	6.67655e-11	24795	0.493	0.991234
detection.of.light.stimulus.involved.in.visual.perception	0.167162	0.0140745	0.0946393	18	0.045	0.41628		0.0346188	0.00179266	0.0140397	680	0.15	0.955333
detection.of.mechanical.stimulus	0.0695597	0.385157	0.657094	13	0.446	0.797548		-0.0296902	0.139117	0.310119	207	0.584	0.991234
detection.of.mechanical.stimulus.involved.in.sensory.perception.of.pain	0.0549953	0.509456	0.763569	12	0.619	0.892877		-0.0144032	0.28453	0.486877	461	0.483	0.991234
detection.of.mechanical.stimulus.involved.in.sensory.perception.of.sound	0.168921	0.0643392	0.240792	10	0.055	0.454788		-0.0315199	0.0194422	0.0821825	459	0.352	0.980215
detection.of.temperature.stimulus.involved.in.sensory.perception.of.pain	0.0360131	0.629143	0.834306	15	0.746	0.93644		0.0156035	0.218695	0.414141	519	0.707	0.99426
detection.of.visible.light	0.220786	0.00808747	0.0688338	12	0.034	0.394715		0.00884864	0.686079	0.818106	174	0.829	0.994939
determination.of.adult.lifespan	-0.150581	0.0370288	0.172511	16	0.039	0.406946		-0.0202712	0.233672	0.431939	288	0.554	0.991234
determination.of.left.right.symmetry	-0.0239002	0.539896	0.781881	55	0.671	0.910316		-0.00441561	0.526434	0.705784	1728	0.783	0.99426
detoxification.of.copper.ion	0.0421967	0.598323	0.815662	13	0.749	0.936851		-0.0595631	0.0937359	0.241799	66	0.358	0.980215
developmental.growth	-0.136422	0.0304493	0.152969	21	0.024	0.35806		0.0202203	0.0256802	0.100309	1019	0.651	0.993185
developmental.process	0.0618636	0.363517	0.639636	18	0.235	0.650798		0.0109585	0.472938	0.661133	358	0.71	0.99426
diacylglycerol.binding	0.201034	0.0158889	0.103035	12	0.01	0.263609		-0.0382323	0.0214448	0.0879876	302	0.424	0.987544
diacylglycerol.kinase.activity	-0.14787	0.0894546	0.293666	11	0.132	0.55118		-0.0464945	0.00010137	0.00155282	584	0.07	0.902063
diacylglycerol.metabolic.process	-0.0836709	0.296204	0.574479	13	0.402	0.768072		-0.0495588	1.84665e-05	0.000393483	624	0.077	0.918596
diet.induced.thermogenesis	0.14127	0.0901558	0.293666	12	0.169	0.598927		0.0165399	0.353986	0.555913	262	0.662	0.993993
digestion	0.14411	0.00830837	0.0694733	28	0.11	0.530481		-0.00323019	0.810321	0.896074	461	0.901	0.995797
digestive.tract.development	-0.0935191	0.0715471	0.257367	31	0.251	0.658846		-0.0189517	0.0388904	0.134241	994	0.507	0.991234
digestive.tract.morphogenesis	-0.0796687	0.319911	0.600002	13	0.317	0.712894		-0.0413116	0.00458875	0.0281554	393	0.329	0.980206
dioxygenase.activity	-0.0486083	0.419692	0.690687	23	0.511	0.841901		-0.0709525	2.70525e-06	8.32257e-05	365	0.034	0.857677
dipeptidase.activity	0.0146851	0.87224	0.949972	10	0.907	0.981161		0.0453876	0.0534329	0.166574	151	0.182	0.966137
dipeptidyl.peptidase.activity	-0.166639	0.045621	0.195893	12	0.115	0.533722		-0.0557448	0.00296553	0.020236	237	0.27	0.978302
disordered.domain.specific.binding	-0.0269196	0.634711	0.83643	26	0.621	0.892877		-0.0193693	0.0856721	0.228342	658	0.382	0.98313
DNA..apurinic.or.apyrimidinic.site..endonuclease.activity	-0.0800697	0.357783	0.637489	11	NA	NA		-0.0277103	0.104124	0.259109	287	0.536	0.991234
DNA.binding	-0.103715	1.88837e-34	9.00043e-32	1256	0.001	0.08765		-0.0193866	2.11715e-27	4.13903e-24	29972	0.147	0.955333
DNA.binding..bending	-0.0708944	0.32618	0.605165	16	0.483	0.826451		-0.00762681	0.495976	0.680146	666	0.809	0.99426
DNA.binding.transcription.activator.activity..RNA.polymerase.II.specific	-0.0701786	9.51784e-07	5.76056e-05	417	0.115	0.533722		-0.0111532	4.83931e-07	1.94568e-05	18442	0.65	0.993185
DNA.binding.transcription.factor.activity	-0.0849999	1.12344e-12	1.78487e-10	606	0.056	0.455536		-0.0186959	3.3078e-21	2.87411e-18	23748	0.337	0.980215
DNA.binding.transcription.factor.activity..RNA.polymerase.II.specific	-0.0928044	5.22151e-31	1.80996e-28	1419	0.015	0.297119		-0.00998829	4.6045e-11	5.80761e-09	44972	0.555	0.991234
DNA.binding.transcription.repressor.activity..RNA.polymerase.II.specific	-0.0725535	0.000148783	0.00357552	231	0.125	0.545766		-0.0172873	4.00561e-09	3.16403e-07	10096	0.283	0.978302
DNA.biosynthetic.process	-0.0759302	0.197883	0.460922	24	0.251	0.658846		0.00806427	0.528582	0.70743	510	0.784	0.99426
DNA.damage.checkpoint	-0.160684	0.00274619	0.0322415	29	0.012	0.28427		0.0200186	0.122515	0.286155	497	0.463	0.991234
DNA.damage.response..detection.of.DNA.damage	-0.0854477	0.0943751	0.302651	32	0.141	0.561119		-0.0188072	0.0804924	0.219589	722	0.391	0.985042
DNA.damage.response..signal.transduction.by.p53.class.mediator	-0.155351	0.0265789	0.142348	17	0.044	0.415806		-0.0187231	0.208286	0.401231	377	0.41	0.985625
DNA.damage.response..signal.transduction.by.p53.class.mediator.resulting.in.cell.cycle.arrest	-0.0701491	0.0831548	0.282845	51	0.156	0.576329		-0.048684	7.58148e-08	3.95248e-06	1021	0.031	0.857677
DNA.damage.response..signal.transduction.by.p53.class.mediator.resulting.in.transcription.of.p21.class.mediator	-0.0913456	0.25411	0.526682	13	0.331	0.724398		-0.00537581	0.736099	0.851565	328	0.917	0.995934
DNA.dealkylation.involved.in.DNA.repair	-0.169733	0.0630674	0.238331	10	0.06	0.463348		0.0132082	0.255993	0.455436	618	0.869	0.994939
DNA.demethylation	-0.0419756	0.561016	0.796113	16	0.606	0.890018		-0.0333029	0.0153899	0.0690669	442	0.567	0.991234
DNA.dependent.ATPase.activity	-0.0843527	0.0887476	0.291971	34	0.222	0.636412		-0.0257643	0.00411796	0.026149	1038	0.365	0.980796
DNA.dependent.DNA.replication	-0.141043	0.0252536	0.137954	21	0.103	0.527676		-0.00752514	0.611638	0.765089	380	0.833	0.994939
DNA.directed.DNA.polymerase.activity	-0.0794087	0.207764	0.47127	21	0.397	0.766877		-0.0304637	0.0102095	0.05108	594	0.298	0.978302
DNA.double.strand.break.processing	-0.220542	0.0081578	0.0689705	12	0.083	0.494134		-0.0332121	0.0668645	0.192945	254	0.121	0.952057
DNA.duplex.unwinding	-0.129871	0.000112781	0.00304988	74	0.013	0.292167		-0.0228104	0.000984827	0.00879149	1752	0.2	0.971127
DNA.helicase.activity	-0.117999	0.0046871	0.0482097	48	0.061	0.464926		-0.0315252	0.000103357	0.00157554	1271	0.096	0.952057
DNA.metabolic.process	-0.188395	0.00222127	0.0276788	22	0.001	0.08765		-0.0010834	0.933794	0.967506	491	0.98	0.999685
DNA.methylation	-0.19815	0.00129395	0.0188314	22	0.022	0.345883		-0.00278412	0.799876	0.889257	693	0.955	0.995934
DNA.methylation.involved.in.gamete.generation	0.0367561	0.569314	0.799524	20	0.791	0.948795		-0.0106708	0.492042	0.676947	346	0.787	0.99426
DNA.polymerase.binding	-0.0109578	0.887107	0.956744	14	0.902	0.980464		-0.0434257	0.00356165	0.0232877	376	0.397	0.985042
DNA.recombination	-0.0856937	0.0240251	0.134136	58	0.051	0.440409		-0.0304867	8.75649e-05	0.00137917	1388	0.215	0.97695
DNA.repair	-0.151431	1.45062e-13	2.76561e-11	201	0	0		-0.0265728	5.92489e-10	5.72008e-08	4618	0.248	0.978302
DNA.replication	-0.153269	1.23611e-09	1.24034e-07	132	0.001	0.08765		-0.0192311	0.000156759	0.002134	3266	0.387	0.984478
DNA.replication.initiation	-0.169394	0.0015932	0.0216188	29	0.023	0.3506		-0.0190019	0.080117	0.21887	709	0.443	0.99065
DNA.replication.origin.binding	-0.103482	0.0792904	0.274102	24	0.245	0.655202		-0.0263088	0.0264064	0.102428	595	0.392	0.985042
DNA.strand.elongation.involved.in.DNA.replication	0.0235849	0.777248	0.907702	12	0.819	0.953325		-0.0354779	0.0205005	0.0854098	356	0.325	0.980206
DNA.synthesis.involved.in.DNA.repair	-0.160975	0.0779338	0.271861	10	0.077	0.494134		-0.0320044	0.0308191	0.114601	380	0.453	0.9907
DNA.templated.transcription..initiation	-0.131666	0.0880419	0.290652	14	0.144	0.563464		-0.0553038	2.1049e-05	0.000440705	494	0.14	0.952057
DNA.unwinding.involved.in.DNA.replication	-0.113065	0.175019	0.430269	12	0.22	0.635878		0.0388327	0.0397133	0.136031	234	0.39	0.984918
dolichol.linked.oligosaccharide.biosynthetic.process	-0.111884	0.147191	0.388922	14	0.285	0.689234		-0.0297734	0.0891326	0.234263	272	0.194	0.971127
dopamine.binding	0.176538	0.0275225	0.14483	13	0.047	0.424696		0.0815949	0.000759479	0.00723668	142	0.093	0.952057
dopamine.biosynthetic.process	-0.0508906	0.577327	0.802825	10	NA	NA		0.0171244	0.377003	0.575532	222	0.649	0.993185
dopamine.metabolic.process	-0.0465859	0.57629	0.801969	12	0.572	0.872314		-0.0132764	0.37226	0.571996	377	0.672	0.993993
dopamine.receptor.signaling.pathway	-0.0734528	0.359123	0.637738	13	0.331	0.724398		0.00159389	0.906748	0.95242	451	0.977	0.999685
dopaminergic.neuron.differentiation	-0.0118828	0.857688	0.941654	19	0.883	0.973215		-0.0154446	0.0893042	0.234467	1013	0.584	0.991234
dopaminergic.synapse	0.1514	0.0587327	0.228579	13	0.208	0.630837		-0.00968677	0.607919	0.762948	234	0.829	0.994939
dorsal.ventral.neural.tube.patterning	-0.0828483	0.364271	0.639961	10	0.419	0.782223		-0.0154418	0.311861	0.514396	358	0.731	0.99426
dorsal.ventral.pattern.formation	0.0178304	0.735369	0.889582	30	0.81	0.950978		-0.0147493	0.037833	0.131754	1664	0.712	0.99426
dosage.compensation.by.inactivation.of.X.chromosome	-0.200438	0.0281667	0.146721	10	NA	NA		-0.00539266	0.813268	0.897439	160	0.893	0.994939
double.strand.break.repair	-0.133504	0.000491281	0.0087284	57	0.01	0.263609		-0.0211606	0.0141817	0.0652018	1125	0.357	0.980215
double.strand.break.repair.via.homologous.recombination	-0.151355	5.89166e-06	0.000269672	75	0.015	0.297119		-0.0151348	0.0220513	0.0899257	1923	0.419	0.98601
double.strand.break.repair.via.nonhomologous.end.joining	-0.104927	0.0201021	0.119765	41	0.152	0.571794		-0.0229093	0.00762601	0.0408536	1136	0.244	0.978302
double.stranded.DNA.binding	-0.0651128	0.0441663	0.192609	80	0.06	0.463348		-0.021249	0.000498891	0.00523668	2259	0.218	0.97695
double.stranded.RNA.binding	-0.017108	0.628315	0.8336	67	0.792	0.948795		-0.0431595	1.12927e-08	7.4209e-07	1468	0.031	0.857677
drug.binding	0.0220073	0.5831	0.807907	52	0.644	0.903103		-0.00292735	0.702254	0.827988	1430	0.887	0.994939
drug.metabolic.process	0.151993	0.0116272	0.084286	23	0.456	0.805815		0.00923852	0.653437	0.794775	197	0.84	0.994939
drug.transmembrane.transport	0.106706	0.2426	0.513133	10	0.384	0.759765		-0.00079373	0.97978	0.990739	85	0.988	0.999685
dynactin.binding	0.0376537	0.665413	0.854503	11	NA	NA		-0.0153647	0.534916	0.712371	136	0.625	0.991544
dynein.complex	-0.0176871	0.773973	0.905572	22	0.882	0.973215		-0.0205015	0.0889704	0.234263	575	0.557	0.991234
dynein.complex.binding	-0.0815335	0.244465	0.515567	17	0.309	0.707612		-0.0488018	0.00307544	0.0208044	307	0.081	0.934248
dynein.heavy.chain.binding	-0.0594483	0.441188	0.710789	14	0.496	0.833242		-0.0200064	0.123119	0.287196	496	0.432	0.989697
dynein.intermediate.chain.binding	-0.0145605	0.797194	0.914743	26	0.877	0.970569		-0.0181693	0.135804	0.306264	563	0.606	0.991234
dynein.light.chain.binding	-0.0599142	0.299769	0.578743	25	0.653	0.907011		-0.010567	0.306522	0.508195	783	0.649	0.993185
dynein.light.intermediate.chain.binding	-0.0584065	0.293521	0.571309	27	0.536	0.851866		-0.00601039	0.613501	0.765958	590	0.875	0.994939
dystroglycan.binding	0.138008	0.130712	0.367822	10	0.085	0.494212		-0.027362	0.0129166	0.060785	690	0.449	0.99065
dystrophin.associated.glycoprotein.complex	0.118144	0.101795	0.313779	16	0.233	0.647818		0.0131853	0.160269	0.339986	949	0.642	0.993185
E.box.binding	-0.0189331	0.656901	0.85254	46	0.815	0.951096		-0.0132969	0.0420929	0.141729	1964	0.702	0.99426
ear.development	-0.0395206	0.665173	0.854503	10	NA	NA		-0.0407644	0.00409624	0.0260427	414	0.267	0.978302
early.endosome	0.0380863	0.0586569	0.228579	208	0.159	0.581287		-0.00312029	0.405426	0.601075	6085	0.83	0.994939
early.endosome.membrane	0.0877273	0.000531472	0.00925345	131	0.003	0.156985		-0.00136466	0.798177	0.888613	2964	0.926	0.995934
early.endosome.to.late.endosome.transport	0.0326414	0.596118	0.814403	22	0.608	0.890018		0.0214202	0.0916227	0.238076	518	0.463	0.991234
early.phagosome	-0.0621551	0.496094	0.754356	10	NA	NA		-0.0258154	0.139033	0.310054	274	0.487	0.991234
eating.behavior	0.138434	0.0188984	0.114927	24	0.084	0.494134		0.00830276	0.527754	0.706984	483	0.83	0.994939
ectoderm.development	-0.00213469	0.978738	0.995446	13	0.981	0.999241		0.0352359	0.0470492	0.152634	265	0.346	0.980215
electron.transfer.activity	0.125544	0.000209359	0.00458785	73	0.049	0.43273		-0.0128401	0.163626	0.345261	985	0.56	0.991234
electron.transport.chain	0.0803989	0.0229048	0.129771	67	0.193	0.620218		-0.0118507	0.204804	0.396723	958	0.581	0.991234
embryo.development.ending.in.birth.or.egg.hatching	0.0788668	0.222076	0.488619	20	0.207	0.629984		-0.000970541	0.922106	0.960809	849	0.973	0.999302
embryo.implantation	-0.0154356	0.752009	0.895017	35	0.806	0.950978		-0.0234597	0.0234629	0.0938995	780	0.258	0.978302
embryonic.brain.development	-0.0714948	0.41158	0.684288	11	NA	NA		-0.0191184	0.246966	0.445595	306	0.606	0.991234
embryonic.camera.type.eye.development	0.0150371	0.856858	0.941014	12	0.866	0.968675		-0.0242533	0.0857603	0.228499	419	0.6	0.991234
embryonic.camera.type.eye.morphogenesis	0.00824839	0.91798	0.971422	13	0.93	0.986858		0.0116315	0.355528	0.557307	527	0.753	0.99426
embryonic.cranial.skeleton.morphogenesis	-0.0247395	0.644733	0.843929	29	0.708	0.921614		-0.0107422	0.157939	0.337039	1449	0.667	0.993993
embryonic.digestive.tract.development	0.0383225	0.607321	0.821488	15	0.526	0.848668		0.0384042	6.61048e-05	0.00110339	903	0.191	0.971127
embryonic.digestive.tract.morphogenesis	-0.154202	0.0235131	0.131981	18	0.078	0.494134		-0.0140442	0.170349	0.354159	797	0.705	0.99426
embryonic.digit.morphogenesis	-0.0196173	0.628	0.833471	51	0.729	0.927049		-0.00833299	0.169383	0.352796	2289	0.778	0.99426
embryonic.forelimb.morphogenesis	-0.0500966	0.326736	0.605165	32	0.485	0.82745		-0.0141856	0.0355284	0.126546	1845	0.653	0.993185
embryonic.heart.tube.development	-0.0293984	0.703296	0.87433	14	0.761	0.940032		0.0116906	0.41954	0.614497	398	0.702	0.99426
embryonic.hemopoiesis	-0.29462	7.78783e-05	0.00226679	15	0.002	0.13749		-0.0392405	0.000689519	0.00675303	625	0.418	0.985754
embryonic.hindlimb.morphogenesis	-0.0348961	0.522761	0.772393	28	0.578	0.872732		0.00197736	0.758362	0.865703	2035	0.924	0.995934
embryonic.limb.morphogenesis	-0.0124315	0.796333	0.914583	36	0.852	0.964404		-0.030504	1.09079e-06	3.87856e-05	2148	0.215	0.97695
embryonic.morphogenesis	-0.019407	0.831699	0.933074	10	NA	NA		-0.0298772	0.106132	0.262435	244	0.325	0.980206
embryonic.organ.development	-0.0828052	0.169235	0.423142	23	0.201	0.627064		-0.00407167	0.681117	0.814798	852	0.87	0.994939
embryonic.pattern.specification	-0.167954	0.0077121	0.0671376	21	0.018	0.323631		-0.0137466	0.0785385	0.21616	1373	0.531	0.991234
embryonic.placenta.development	-0.0520322	0.432339	0.701494	19	0.532	0.851297		-0.0457856	0.0011486	0.0099249	421	0.226	0.978302
embryonic.skeletal.joint.morphogenesis	0.032492	0.72198	0.882291	10	NA	NA		-0.0248934	0.0204363	0.0852101	725	0.603	0.991234
embryonic.skeletal.system.development	0.0340888	0.525205	0.774088	29	0.627	0.892877		-0.0136102	0.0415997	0.140523	1883	0.696	0.99426
embryonic.skeletal.system.morphogenesis	-0.0290839	0.519385	0.77029	41	0.714	0.921614		-0.0158659	0.0205791	0.0856231	1789	0.558	0.991234
embryonic.viscerocranium.morphogenesis	0.107581	0.238757	0.509316	10	NA	NA		-0.0334159	0.00452859	0.0279177	603	0.321	0.979216
enamel.mineralization	0.123586	0.155787	0.402995	11	0.268	0.67259		0.0523317	0.000914482	0.00835426	335	0.122	0.952057
endocardial.cushion.morphogenesis	-0.077694	0.267391	0.541569	17	0.294	0.694117		-0.0227301	0.0155479	0.0695369	948	0.473	0.991234
endochondral.ossification	0.0614019	0.269463	0.543631	27	0.31	0.708052		-0.00186003	0.809462	0.895711	1409	0.918	0.995934
endocrine.pancreas.development	-0.0513323	0.384038	0.656471	24	0.437	0.791794		0.000730201	0.940401	0.969792	877	0.99	0.999685
endocytic.recycling	0.0121248	0.821216	0.927517	29	0.85	0.964404		-0.0240779	0.0113964	0.0553772	924	0.548	0.991234
endocytic.vesicle	0.0494635	0.221807	0.488307	51	0.3	0.699335		-0.0114843	0.148907	0.324542	1324	0.724	0.99426
endocytic.vesicle.lumen	0.138554	0.0631691	0.238479	15	0.201	0.627064		0.0322521	0.0882809	0.233078	233	0.545	0.991234
endocytic.vesicle.membrane	0.0174288	0.632447	0.836321	63	0.832	0.957961		-0.0282367	2.05058e-05	0.000431063	1912	0.313	0.979216
endocytosis	0.00214639	0.923169	0.972656	170	0.923	0.986597		-0.0371228	6.35687e-17	2.68707e-14	4305	0.172	0.962125
endoderm.development	-0.0630104	0.341675	0.619794	19	0.363	0.748634		0.000965785	0.918339	0.95848	943	0.962	0.996403
endodermal.cell.differentiation	0.0718269	0.188357	0.447963	28	0.333	0.725154		-0.0333532	0.000486681	0.00513263	915	0.1	0.952057
endolysosome.membrane	-0.176946	0.0337946	0.162495	12	0.062	0.468443		-0.0735568	0.000338471	0.00386917	198	0.163	0.955333
endomembrane.system	0.0791713	0.0230058	0.129957	69	0.096	0.519407		0.0185419	0.00227989	0.0167958	2279	0.504	0.991234
endonuclease.activity	-0.0369738	0.442709	0.711773	36	0.494	0.832275		0.0331144	0.00453053	0.0279187	614	0.436	0.989697
endopeptidase.activity	0.0593108	0.0982984	0.309239	65	0.198	0.627064		-0.0248729	0.000843056	0.00782516	1511	0.188	0.967898
endopeptidase.inhibitor.activity	0.000914694	0.985938	0.998243	31	0.991	1		-0.0151707	0.36301	0.56376	300	0.605	0.991234
endoplasmic.reticulum	0.0121162	0.230743	0.500375	860	0.447	0.797548		-0.0120278	2.84933e-08	1.6505e-06	19374	0.305	0.978302
endoplasmic.reticulum.calcium.ion.homeostasis	-0.048223	0.532129	0.776209	14	0.59	0.879481		-0.0952661	6.65104e-11	8.25208e-09	392	0.039	0.87764
endoplasmic.reticulum.chaperone.complex	0.133896	0.142575	0.382523	10	NA	NA		-0.0266051	0.235226	0.433683	166	0.438	0.989697
endoplasmic.reticulum.exit.site	0.0221346	0.731831	0.887569	20	0.732	0.928431		0.000169985	0.989728	0.994762	479	0.99	0.999685
endoplasmic.reticulum.Golgi.intermediate.compartment	0.0311015	0.386004	0.658066	65	0.348	0.732786		-0.00362481	0.659103	0.798758	1241	0.864	0.994939
endoplasmic.reticulum.Golgi.intermediate.compartment.membrane	0.0298682	0.412415	0.684903	63	0.477	0.822204		-0.042205	9.97906e-09	6.68103e-07	1547	0.05	0.887495
endoplasmic.reticulum.lumen	0.0301411	0.078509	0.272388	289	0.425	0.786306		-0.00781105	0.0312729	0.115765	6519	0.621	0.991544
endoplasmic.reticulum.mannose.trimming	0.0702728	0.380304	0.655478	13	0.358	0.744895		-0.000944027	0.966102	0.983138	169	0.984	0.999685
endoplasmic.reticulum.membrane	0.0450329	1.11994e-05	0.000454289	835	0.004	0.171024		-0.0168522	7.93864e-13	1.39506e-10	16189	0.262	0.978302
endoplasmic.reticulum.organization	-0.000198931	0.996942	0.999383	31	0.994	1		-0.0274813	0.0244454	0.0967178	560	0.374	0.980897
endoplasmic.reticulum.quality.control.compartment	0.0501376	0.415602	0.686906	22	0.401	0.767835		-0.0359401	0.0139038	0.0643423	391	0.206	0.975145
endoplasmic.reticulum.tubular.network	-0.0380435	0.662164	0.854503	11	NA	NA		-0.0508042	0.0071287	0.0390139	234	0.144	0.952057
endoplasmic.reticulum.unfolded.protein.response	-0.0476349	0.285515	0.562778	42	0.38	0.756819		-0.0485902	6.05956e-07	2.3575e-05	882	0.09	0.952057
endoribonuclease.activity	0.0849814	0.149558	0.391836	24	0.185	0.610024		0.005597	0.610051	0.764388	694	0.902	0.995797
endosomal.transport	0.0780113	0.0284526	0.147032	66	0.064	0.468443		-0.00732103	0.36408	0.564901	1288	0.776	0.99426
endosome	0.0316215	0.0940918	0.301997	237	0.313	0.710277		-0.00364791	0.355514	0.557307	5476	0.775	0.99426
endosome.lumen	-0.0619998	0.390532	0.66241	16	0.516	0.844977		-0.0179165	0.270232	0.471805	316	0.447	0.99065
endosome.membrane	0.0320153	0.123681	0.356127	195	0.313	0.710277		-0.0123143	0.00761905	0.0408368	3982	0.417	0.985625
endosome.organization	0.00763084	0.877631	0.952307	34	0.912	0.982498		-0.0176185	0.105163	0.260842	707	0.534	0.991234
endosome.to.lysosome.transport	0.11792	0.00899411	0.0725522	41	0.031	0.386783		0.0199443	0.0634436	0.186445	724	0.584	0.991234
endosome.transport.via.multivesicular.body.sorting.pathway	0.17758	0.0414	0.185715	11	NA	NA		-0.0157622	0.454244	0.645853	188	0.756	0.99426
endothelial.cell.differentiation	0.060241	0.489022	0.749152	11	NA	NA		-0.033618	0.00936023	0.0476388	499	0.425	0.987961
endothelial.cell.migration	0.0569793	0.324066	0.603646	25	0.363	0.748634		0.00553527	0.543755	0.71835	1007	0.845	0.994939
endothelial.cell.morphogenesis	-0.070235	0.41987	0.690687	11	0.474	0.820883		-0.0494408	0.00147898	0.0121233	345	0.118	0.952057
endothelial.cell.proliferation	0.0149493	0.841114	0.936814	15	0.853	0.964404		-0.0216912	0.221522	0.417683	265	0.497	0.991234
energy.homeostasis	0.0927955	0.0650795	0.24186	33	0.076	0.492525		-0.00850707	0.35703	0.558562	981	0.707	0.99426
energy.reserve.metabolic.process	0.0569914	0.460296	0.728163	14	0.595	0.881314		0.0324262	0.064594	0.188691	271	0.347	0.980215
engulfment.of.apoptotic.cell	0.145737	0.110502	0.331247	10	0.145	0.564229		-0.00616823	0.658377	0.798157	429	0.793	0.99426
enhancer.binding	-0.0554856	0.488484	0.749152	13	0.555	0.867126		-0.0515863	2.13843e-05	0.000447125	567	0.148	0.955333
enhancer.sequence.specific.DNA.binding	-0.0333484	0.605642	0.821488	20	0.607	0.890018		0.0223265	0.00922152	0.0471295	1139	0.348	0.980215
enteric.nervous.system.development	-0.0887559	0.287033	0.564736	12	0.365	0.750992		-0.00141109	0.930694	0.965828	317	0.958	0.995934
entrainment.of.circadian.clock.by.photoperiod	-0.0156803	0.817843	0.925352	18	0.829	0.957337		-0.0426033	0.00638661	0.0359304	342	0.428	0.989697
enzyme.activator.activity	-0.0585578	0.179037	0.435176	44	0.255	0.661265		-0.011779	0.236715	0.435351	844	0.616	0.991234
enzyme.binding	-0.0313335	0.0587484	0.228579	309	0.079	0.494134		-0.0141814	1.13643e-05	0.000265676	8281	0.463	0.991234
enzyme.inhibitor.activity	-0.0509489	0.377902	0.653488	25	0.369	0.753474		0.0368424	0.00560738	0.0326141	472	0.321	0.979216
enzyme.regulator.activity	-0.0272387	0.705997	0.875436	16	0.73	0.927648		-0.0186803	0.289719	0.492309	268	0.644	0.993185
eosinophil.chemotaxis	-0.0966142	0.144851	0.385697	19	0.268	0.67259		0.0462519	0.128588	0.295448	90	0.374	0.980897
ephrin.receptor.binding	-0.0647558	0.253087	0.525324	26	0.34	0.730417		-0.0406004	1.30323e-08	8.28556e-07	1646	0.062	0.902063
ephrin.receptor.signaling.pathway	0.0364975	0.27149	0.545988	76	0.532	0.851297		-0.00943141	0.0481823	0.155184	3717	0.539	0.991234
epidermal.growth.factor.receptor.binding	-0.0677234	0.184912	0.44512	32	0.176	0.602594		-0.0146831	0.0672295	0.193784	1302	0.353	0.980215
epidermal.growth.factor.receptor.signaling.pathway	-0.000309807	0.994201	0.999237	46	0.995	1		-0.0381311	2.69927e-06	8.32257e-05	1269	0.026	0.857677
epidermis.development	0.187195	3.23753e-08	2.62653e-06	73	0.001	0.08765		0.0341173	4.56938e-05	0.000828102	1196	0.081	0.934248
epithelial.cell.cell.adhesion	0.112632	0.217422	0.483117	10	NA	NA		-0.0190681	0.206086	0.398415	367	0.493	0.991234
epithelial.cell.development	-0.0357107	0.668389	0.854503	12	0.698	0.920341		-0.00939805	0.432803	0.627734	582	0.658	0.993993
epithelial.cell.differentiation	0.0987788	0.00486548	0.0493406	68	0.03	0.381087		0.00237528	0.735732	0.851474	1695	0.932	0.995934
epithelial.cell.morphogenesis	0.0763497	0.290334	0.567133	16	0.31	0.708052		-0.00488765	0.702507	0.828081	510	0.92	0.995934
epithelial.cell.proliferation	-0.034669	0.677509	0.859607	12	0.728	0.927049		-0.0264764	0.0218215	0.0891091	627	0.454	0.9907
epithelial.cilium.movement	-0.0351816	0.637082	0.83762	15	0.797	0.949492		0.00102545	0.944839	0.972126	380	0.972	0.999282
epithelial.to.mesenchymal.transition	-0.0132373	0.780547	0.90809	37	0.785	0.947078		-0.0276691	0.000398653	0.00435704	1373	0.245	0.978302
epithelial.to.mesenchymal.transition.involved.in.endocardial.cushion.formation	-0.0938311	0.260364	0.53283	12	0.315	0.711133		-0.0357601	0.0181989	0.078131	364	0.343	0.980215
epithelial.tube.branching.involved.in.lung.morphogenesis	0.0256886	0.730484	0.886767	15	0.771	0.94102		-0.0388701	0.00032144	0.00371844	716	0.101	0.952057
epoxygenase.P450.pathway	0.202009	0.00300509	0.034828	18	0.376	0.755448		-0.0272928	0.288703	0.491115	126	0.587	0.991234
ER.associated.misfolded.protein.catabolic.process	0.0373196	0.682774	0.863203	10	NA	NA		0.00307879	0.892724	0.944585	160	0.936	0.995934
ER.membrane.protein.complex	-0.0643168	0.481233	0.744398	10	NA	NA		-0.0489104	0.0435524	0.144958	142	0.207	0.975145
ER.overload.response	-0.00156392	0.986336	0.99838	10	NA	NA		-0.052682	0.00203991	0.01551	286	0.132	0.952057
ER.to.Golgi.transport.vesicle.membrane	0.134319	0.000808348	0.0130052	52	0.145	0.564229		-0.00962571	0.273407	0.475279	1084	0.529	0.991234
ER.to.Golgi.vesicle.mediated.transport	0.0286238	0.198392	0.461544	170	0.258	0.662673		-0.0388789	1.17967e-17	5.95162e-15	4108	0.004	0.747003
ERAD.pathway	0.0626095	0.452641	0.721108	12	0.481	0.825446		-0.0178394	0.328781	0.530665	250	0.626	0.991544
ERBB2.signaling.pathway	-0.0587842	0.265147	0.538915	30	0.324	0.719863		-0.0183946	0.0183997	0.0788632	1377	0.258	0.978302
ERK1.and.ERK2.cascade	-0.138465	0.014534	0.096885	26	0.011	0.279464		-0.0344485	0.000857571	0.00793164	783	0.193	0.971127
error.free.translesion.synthesis	-0.0183539	0.805586	0.918022	15	0.835	0.959839		0.0176797	0.272109	0.47413	322	0.55	0.991234
error.prone.translesion.synthesis	-0.071504	0.307384	0.586435	17	0.503	0.837055		0.0148073	0.337614	0.540238	350	0.541	0.991234
erythrocyte.development	0.0183482	0.793382	0.912293	17	0.83	0.957753		-0.0308982	0.00592265	0.0339644	663	0.404	0.985625
erythrocyte.differentiation	-0.1199	0.00790398	0.0680314	41	0.01	0.263609		0.0129436	0.148906	0.324542	1041	0.603	0.991234
erythrocyte.maturation	0.0287405	0.719732	0.880442	13	0.708	0.921614		0.0109209	0.63133	0.7796	161	0.823	0.994939
ESCRT.I.complex	0.150006	0.100447	0.312001	10	NA	NA		-0.0413537	0.0384479	0.133154	209	0.524	0.991234
ESCRT.III.complex.disassembly	0.192999	0.0345587	0.165128	10	NA	NA		-0.0156828	0.526495	0.705784	136	0.604	0.991234
establishment.of.cell.polarity	0.0300805	0.543881	0.784646	34	0.61	0.891108		0.0485082	2.60599e-13	5.1592e-11	1910	0.144	0.952057
establishment.of.endothelial.barrier	0.0114561	0.877905	0.952334	15	0.892	0.977782		-0.00785123	0.543927	0.718397	499	0.806	0.99426
establishment.of.epithelial.cell.apical.basal.polarity	-0.0449604	0.58967	0.812668	12	0.671	0.910316		-0.0245632	0.120755	0.283746	333	0.587	0.991234
establishment.of.epithelial.cell.polarity	0.236045	0.00463408	0.0480156	12	NA	NA		0.0168317	0.197294	0.388087	490	0.59	0.991234
establishment.of.mitotic.spindle.orientation	-0.0890871	0.102771	0.315482	28	0.203	0.627064		-0.000593259	0.957324	0.978982	680	0.984	0.999685
establishment.of.planar.polarity	-0.0501872	0.530939	0.775065	13	0.492	0.832275		-0.0317008	0.0156975	0.0700455	485	0.318	0.979216
establishment.of.protein.localization	-0.0250348	0.613458	0.825959	34	0.651	0.905357		-0.00463955	0.518801	0.698404	1623	0.807	0.99426
establishment.of.skin.barrier	0.149491	0.0152133	0.0998292	22	0.082	0.494134		-0.0102371	0.411317	0.606943	538	0.683	0.994068
establishment.or.maintenance.of.cell.polarity	0.0599716	0.226246	0.494369	34	0.205	0.62881		-0.0146285	0.0960144	0.245834	1084	0.481	0.991234
establishment.or.maintenance.of.epithelial.cell.apical.basal.polarity	-0.027229	0.68919	0.866831	18	0.728	0.927049		0.00360493	0.631573	0.779607	1484	0.889	0.994939
establishment.or.maintenance.of.transmembrane.electrochemical.gradient	-0.0848741	0.289313	0.566635	13	0.316	0.712015		0.017316	0.327293	0.529056	267	0.794	0.99426
estradiol.17.beta.dehydrogenase.activity	0.00338988	0.968944	0.992991	11	0.97	0.998486		-0.0124804	0.556666	0.727514	185	0.711	0.99426
estrogen.biosynthetic.process	0.0199903	0.802917	0.916898	13	0.859	0.966823		1.25216e-05	0.999496	0.999797	212	1	1
estrogen.metabolic.process	0.0816277	0.243921	0.514703	17	0.613	0.892145		-0.0991041	5.29545e-06	0.000144287	176	0.014	0.815583
estrogen.receptor.binding	0.020292	0.665155	0.854503	38	0.687	0.916872		-0.00720881	0.386287	0.583916	1210	0.728	0.99426
estrous.cycle	0.177133	0.0141604	0.0948922	16	0.013	0.292167		-0.017771	0.228683	0.426445	383	0.608	0.991234
ethanol.catabolic.process	0.162731	0.0509372	0.208842	12	0.304	0.702587		0.0795134	0.000159926	0.00216933	188	0.256	0.978302
ethanol.oxidation	0.17059	0.0407297	0.184008	12	0.34	0.730417		-0.0433499	0.159002	0.338524	88	0.374	0.980897
eukaryotic.43S.preinitiation.complex	0.113416	0.141733	0.381658	14	0.218	0.635878		-0.0208898	0.217328	0.412201	291	0.597	0.991234
eukaryotic.48S.preinitiation.complex	0.109768	0.154994	0.401981	14	0.221	0.636412		-0.0390293	0.0269632	0.103945	268	0.34	0.980215
eukaryotic.translation.initiation.factor.3.complex	0.122014	0.127681	0.363319	13	0.188	0.613142		-0.0447588	0.0100438	0.0504285	276	0.259	0.978302
eukaryotic.translation.initiation.factor.4F.complex	-0.0930801	0.308059	0.586435	10	NA	NA		-0.0405602	0.00995372	0.0501373	337	0.327	0.980206
excitatory.postsynaptic.potential	0.121201	0.000880868	0.0138791	63	0.057	0.457304		-0.0372018	1.94784e-09	1.6291e-07	2190	0.033	0.857677
excitatory.synapse	0.12404	0.016844	0.10683	31	0.098	0.524311		-0.00982005	0.196303	0.386868	1452	0.704	0.99426
excretion	0.0354012	0.51676	0.768897	28	0.761	0.940032		0.0139729	0.229113	0.426942	619	0.576	0.991234
execution.phase.of.apoptosis	-0.000505584	0.993913	0.999237	19	0.994	1		-0.080926	5.09343e-06	0.000139757	265	0.035	0.867951
exit.from.mitosis	0.163856	0.0598523	0.230621	11	NA	NA		-0.00513708	0.82866	0.906058	148	0.858	0.994939
exocyst	0.0521281	0.48453	0.746327	15	0.487	0.828846		0.0141167	0.177767	0.364053	762	0.66	0.993993
exocytic.vesicle	0.117782	0.0457907	0.19618	24	0.122	0.542119		0.00645113	0.527797	0.706984	801	0.822	0.994939
exocytosis	0.104777	0.00111996	0.0168126	81	0.004	0.171024		0.00797727	0.169299	0.352668	2501	0.711	0.99426
exogenous.drug.catabolic.process	0.248698	7.96877e-05	0.00230189	21	0.133	0.55118		-0.00412379	0.868696	0.932264	134	0.922	0.995934
exonuclease.activity	-0.1637	0.0409789	0.184914	13	0.036	0.401962		0.00279259	0.877062	0.936971	256	0.95	0.995934
exonucleolytic.nuclear.transcribed.mRNA.catabolic.process.involved.in.deadenylation.dependent.decay	0.0664874	0.259541	0.532345	24	0.342	0.731575		-0.0204865	0.118467	0.280267	485	0.488	0.991234
exosome..RNase.complex.	0.0445881	0.549891	0.789132	15	0.591	0.880598		0.00627714	0.689977	0.820028	337	0.875	0.994939
exploration.behavior	-0.0369785	0.671058	0.856053	11	0.734	0.929027		-0.0246006	0.0828341	0.223824	415	0.439	0.989697
external.side.of.plasma.membrane	-0.0903831	3.52149e-07	2.44136e-05	269	0.133	0.55118		-0.00566897	0.131209	0.29949	6067	0.719	0.99426
extracellular.exosome	0.0587542	1.59921e-16	3.38767e-14	1849	0.084	0.494134		-0.00995944	1.85812e-09	1.57086e-07	35948	0.52	0.991234
extracellular.matrix	0.0637006	0.00124157	0.0183492	217	0.156	0.576329		-0.0183569	5.61818e-07	2.21283e-05	6368	0.093	0.952057
extracellular.matrix.assembly	-0.0220005	0.809615	0.920137	10	NA	NA		-0.0321642	0.0525992	0.164794	303	0.169	0.961849
extracellular.matrix.binding	0.0667678	0.247867	0.519581	25	0.225	0.639513		0.0182631	0.0628292	0.185231	868	0.325	0.980206
extracellular.matrix.disassembly	0.109586	0.00360725	0.039411	59	0.11	0.530481		-0.0217552	0.0341274	0.123283	793	0.452	0.99065
extracellular.matrix.organization	0.0530769	0.00616099	0.0581481	225	0.285	0.689234		-0.012621	0.000920989	0.00838921	5895	0.411	0.985625
extracellular.matrix.structural.constituent	0.118989	3.39702e-06	0.000170432	128	0.022	0.345883		-0.0162567	0.000714763	0.00693479	3669	0.28	0.978302
extracellular.matrix.structural.constituent.conferring.compression.resistance	0.162098	0.0297256	0.150723	15	0.106	0.530151		-0.0222238	0.202814	0.394333	274	0.579	0.991234
extracellular.matrix.structural.constituent.conferring.tensile.strength	0.172664	0.000130765	0.00330202	41	0.053	0.449923		-0.0107071	0.175485	0.361558	1342	0.621	0.991544
extracellular.region	0.00282361	0.707381	0.876014	1634	0.917	0.983783		-0.000905508	0.593683	0.754711	33917	0.934	0.995934
extracellular.space	0.0293781	0.000363364	0.00679171	1335	0.377	0.755724		-0.00824023	1.37553e-05	0.00030999	26169	0.515	0.991234
extracellular.vesicle	0.0247304	0.529684	0.774922	54	0.724	0.926065		0.00940366	0.293649	0.496881	1044	0.697	0.99426
extrinsic.apoptotic.signaling.pathway	-0.189128	2.7928e-05	0.000981884	41	0.014	0.293916		-0.00940802	0.255277	0.454834	1225	0.861	0.994939
extrinsic.apoptotic.signaling.pathway.in.absence.of.ligand	-0.034079	0.518281	0.768951	30	0.645	0.903103		-0.0346846	0.000127789	0.00183501	1021	0.089	0.952057
extrinsic.apoptotic.signaling.pathway.via.death.domain.receptors	-0.0517137	0.33513	0.613127	29	0.468	0.81795		-0.0527184	1.72736e-07	7.99286e-06	822	0.214	0.97695
extrinsic.component.of.cytoplasmic.side.of.plasma.membrane	0.0559216	0.147853	0.38978	56	0.192	0.618706		-0.00984595	0.198522	0.389964	1430	0.702	0.99426
extrinsic.component.of.membrane	0.0825223	0.0235371	0.131981	63	0.014	0.293916		0.000924089	0.901944	0.949223	1491	0.956	0.995934
extrinsic.component.of.plasma.membrane	-0.0142325	0.797975	0.914743	27	0.799	0.949492		0.0123119	0.368745	0.568636	445	0.747	0.99426
eye.development	0.0285759	0.581895	0.807117	31	0.656	0.907273		0.0221383	0.00328405	0.021875	1479	0.274	0.978302
eye.photoreceptor.cell.development	-0.0124533	0.854861	0.940571	18	0.84	0.962005		-0.00730678	0.4977	0.681822	720	0.795	0.99426
eyelid.development.in.camera.type.eye	-0.0612509	0.44445	0.713553	13	0.401	0.767835		-0.0278977	0.0334999	0.121674	485	0.295	0.978302
face.development	-0.0500564	0.50206	0.760056	15	0.516	0.844977		-0.00391875	0.720267	0.840592	698	0.932	0.995934
face.morphogenesis	-0.0275159	0.595977	0.814403	31	0.698	0.920341		-0.0517244	6.0867e-10	5.84024e-08	1199	0.013	0.815583
FAD.binding	0.0329953	0.524923	0.774088	31	0.662	0.910316		-0.0421384	0.00325821	0.0217445	407	0.103	0.952057
fascia.adherens	0.278422	0.00229643	0.0284044	10	NA	NA		-0.0251871	0.0260995	0.101541	652	0.283	0.978302
fat.cell.differentiation	-0.0169764	0.63096	0.835508	67	0.682	0.913677		-0.0367054	2.30935e-10	2.49091e-08	2513	0.063	0.902063
fatty.acid.beta.oxidation	0.144696	0.00154437	0.0211064	40	0.241	0.65449		-0.00683148	0.594903	0.755463	506	0.775	0.99426
fatty.acid.beta.oxidation.using.acyl.CoA.oxidase	0.280855	0.000165722	0.00387667	15	0.077	0.494134		0.0443329	0.039988	0.136642	179	0.171	0.962029
fatty.acid.binding	0.202208	0.00174442	0.0233385	20	0.068	0.480661		0.0388729	0.0281662	0.107707	266	0.37	0.980796
fatty.acid.biosynthetic.process	0.176066	0.00011685	0.00309409	40	0.021	0.345883		0.011248	0.285447	0.487759	754	0.59	0.991234
fatty.acid.catabolic.process	0.0764036	0.359414	0.637738	12	0.458	0.807314		0.0105872	0.602351	0.758577	202	0.816	0.994939
fatty.acid.homeostasis	0.206219	0.0100359	0.0773744	13	0.028	0.379027		-0.0465837	0.0112519	0.0548395	247	0.369	0.980796
fatty.acid.metabolic.process	0.0966242	0.0159609	0.103326	52	0.203	0.627064		0.00439463	0.700319	0.826745	641	0.88	0.994939
fatty.acid.oxidation	0.231376	0.00272098	0.0322415	14	0.007	0.250429		-0.0149267	0.321623	0.524087	368	0.682	0.994068
fatty.acyl.CoA.binding	0.170353	0.0101487	0.0776485	19	0.139	0.556317		-0.0271117	0.0645437	0.188579	388	0.359	0.980215
fatty.acyl.CoA.biosynthetic.process	0.128	0.141541	0.38141	11	0.251	0.658846		0.0705623	1.3253e-05	0.000300837	318	0.03	0.857677
Fc.epsilon.receptor.signaling.pathway	-0.0498808	0.0930963	0.299778	95	0.131	0.55118		-0.0392794	2.64805e-12	4.36127e-10	2674	0.006	0.747003
Fc.gamma.receptor.signaling.pathway.involved.in.phagocytosis	0.0437104	0.230328	0.499852	63	0.282	0.688025		-0.019896	0.00325889	0.0217445	1837	0.422	0.986979
feeding.behavior	0.0120882	0.831056	0.932828	26	0.861	0.966901		-0.0350954	0.000561182	0.00577047	808	0.146	0.954615
female.gamete.generation	-0.148128	0.0469911	0.198489	15	0.165	0.589094		0.0350491	0.0059191	0.0339599	515	0.515	0.991234
female.gonad.development	0.0102386	0.88724	0.956744	16	0.841	0.962005		-0.0572422	5.906e-08	3.16335e-06	750	0.071	0.902063
female.pregnancy	-0.0099003	0.753888	0.896661	84	0.833	0.958798		-0.0254766	9.88315e-05	0.00152512	1963	0.349	0.980215
ferric.iron.binding	0.112771	0.216855	0.482693	10	0.214	0.633686		-0.0560691	0.0235489	0.0941476	136	0.238	0.978302
ferrous.iron.binding	-0.0159496	0.791176	0.911957	23	0.765	0.94102		-0.0258281	0.0250356	0.0985296	629	0.545	0.991234
fertilization	-0.0533172	0.28201	0.559599	34	0.307	0.706725		-0.0281155	0.00621503	0.0352156	792	0.471	0.991234
fibrillar.center	-0.096874	0.000197061	0.00444921	124	0.022	0.345883		-0.00901686	0.0491928	0.157465	4036	0.554	0.991234
fibrinolysis	0.0588807	0.350262	0.629381	21	0.627	0.892877		0.0115	0.494111	0.678548	295	0.747	0.99426
fibroblast.growth.factor.binding	-0.00437587	0.945986	0.981507	20	0.954	0.993974		-0.0349482	0.00713215	0.0390139	495	0.31	0.979216
fibroblast.growth.factor.receptor.binding	0.00803338	0.898591	0.9639	21	0.93	0.986858		0.00576734	0.59428	0.755101	713	0.776	0.99426
fibroblast.growth.factor.receptor.signaling.pathway	-0.0485059	0.166751	0.419963	68	0.388	0.762089		-0.0215434	0.000854576	0.0079133	2014	0.412	0.985625
fibronectin.binding	-0.000715581	0.990119	0.999237	25	0.994	1		-0.0217243	0.088644	0.233679	513	0.384	0.984478
ficolin.1.rich.granule.lumen	0.0599546	0.0306856	0.153549	109	0.268	0.67259		-0.017947	0.00457805	0.0281118	2099	0.414	0.985625
ficolin.1.rich.granule.membrane	-0.00429972	0.912987	0.969754	54	0.935	0.987978		0.0198865	0.0420797	0.141716	874	0.498	0.991234
filamentous.actin	0.0701644	0.224622	0.492515	25	0.226	0.639513		0.00528253	0.661204	0.800281	575	0.883	0.994939
filamin.binding	-0.0491667	0.59029	0.812673	10	0.593	0.881314		0.00535278	0.774945	0.875986	238	0.879	0.994939
filopodium	0.0522071	0.162028	0.412701	60	0.154	0.573777		-0.00306658	0.561698	0.73074	3024	0.913	0.995797
filopodium.assembly	-0.0376966	0.590492	0.812673	17	0.74	0.933252		-0.0328075	0.0195301	0.0824975	423	0.388	0.984478
filopodium.membrane	-0.0286709	0.682335	0.862933	17	0.681	0.913035		-0.016105	0.100693	0.253192	869	0.536	0.991234
filopodium.tip	0.0675759	0.349336	0.628014	16	0.407	0.77425		0.0130689	0.252007	0.45127	642	0.606	0.991234
flagellated.sperm.motility	-0.12055	0.00198976	0.0259827	55	0.19	0.616226		-0.00898977	0.265065	0.465852	1288	0.734	0.99426
flavin.adenine.dinucleotide.binding	0.143561	0.000263871	0.00538699	54	0.125	0.545766		-0.0114835	0.195045	0.385311	1066	0.707	0.99426
Flemming.body	0.00014479	0.998041	0.999433	24	0.999	1		0.0191564	0.0548867	0.169616	840	0.543	0.991234
FMN.binding	0.0124829	0.86706	0.947306	15	0.901	0.980418		0.0298679	0.0686874	0.196465	310	0.349	0.980215
focal.adhesion	0.0289127	0.0656504	0.24327	345	0.302	0.701665		-0.0107664	0.000332979	0.00382083	9661	0.522	0.991234
focal.adhesion.assembly	-0.0430009	0.439308	0.708879	27	0.539	0.852383		-0.0377401	1.29636e-05	0.000296862	1118	0.04	0.879887
folic.acid.binding	0.0460255	0.597082	0.815015	11	0.665	0.910316		-0.0400428	0.066611	0.192767	175	0.452	0.99065
folic.acid.metabolic.process	0.12436	0.0677509	0.248391	18	0.125	0.545766		-0.000998635	0.952811	0.976474	293	0.971	0.998714
forebrain.development	0.0015874	0.970615	0.993013	45	0.973	0.998635		-0.0122629	0.0596299	0.179142	1983	0.557	0.991234
forelimb.morphogenesis	-0.00933519	0.918576	0.971422	10	NA	NA		0.00165305	0.877655	0.937274	725	0.96	0.996112
formation.of.cytoplasmic.translation.initiation.complex	0.108889	0.144237	0.385136	15	0.237	0.652215		-0.0225883	0.188333	0.377341	283	0.569	0.991234
frizzled.binding	0.00922919	0.841937	0.936814	39	0.891	0.97773		-0.0388861	1.16421e-06	4.10097e-05	1310	0.105	0.952057
fructose.metabolic.process	0.119298	0.191412	0.452482	10	0.335	0.727701		0.0226103	0.385161	0.583731	123	0.635	0.992346
fucosylation	-0.209028	0.0163648	0.105116	11	0.038	0.403721		-0.0317839	0.266253	0.46733	102	0.511	0.991234
fusion.of.sperm.to.egg.plasma.membrane.involved.in.single.fertilization	-0.217847	0.00653289	0.0601688	13	0.107	0.530481		0.0256761	0.316307	0.518233	127	0.599	0.991234
G.protein.alpha.subunit.binding	0.0747588	0.214574	0.47992	23	0.277	0.684399		-0.0773063	6.40143e-09	4.55084e-07	471	0.001	0.401026
G.protein.beta.gamma.subunit.complex.binding	0.0907	0.160251	0.410368	20	0.311	0.709412		-0.0170908	0.194138	0.384343	482	0.661	0.993993
G.protein.beta.subunit.binding	0.115588	0.134261	0.372566	14	0.137	0.554005		-0.0318367	0.0960231	0.245834	228	0.333	0.980206
G.protein.coupled.acetylcholine.receptor.signaling.pathway	0.0188483	0.807083	0.918903	14	0.832	0.957961		-0.0540952	1.96929e-05	0.000414531	520	0.164	0.955333
G.protein.coupled.glutamate.receptor.signaling.pathway	0.137964	0.0643008	0.240792	15	0.18	0.604483		0.0306618	0.00232415	0.0170554	825	0.273	0.978302
G.protein.coupled.peptide.receptor.activity	0.0701452	0.13462	0.372772	38	0.316	0.712015		0.000972449	0.924933	0.962344	785	0.971	0.998714
G.protein.coupled.photoreceptor.activity	0.250996	0.00172664	0.0232639	13	0.006	0.23636		0.0137246	0.478923	0.666649	222	0.748	0.99426
G.protein.coupled.purinergic.nucleotide.receptor.activity	0.0240051	0.773387	0.905572	12	0.794	0.948795		-0.0478117	0.129092	0.29591	84	0.263	0.978302
G.protein.coupled.purinergic.nucleotide.receptor.signaling.pathway	0.0461943	0.564127	0.798162	13	0.593	0.881314		-0.032225	0.28179	0.484248	93	0.464	0.991234
G.protein.coupled.receptor.activity	0.205807	6.58367e-67	8.36785e-64	610	0.022	0.345883		-0.0112737	4.02064e-10	4.10999e-08	29383	0.51	0.991234
G.protein.coupled.receptor.binding	0.052976	0.149234	0.391836	62	0.255	0.661265		-0.0192796	0.0152713	0.0686526	1327	0.599	0.991234
G.protein.coupled.receptor.internalization	-0.0455137	0.569882	0.799524	13	0.574	0.872321		0.00936187	0.603336	0.75939	257	0.788	0.99426
G.protein.coupled.receptor.signaling.pathway	0.142651	4.134e-52	3.15259e-49	1006	0.007	0.250429		-0.0130828	1.78105e-15	5.35685e-13	36638	0.315	0.979216
G.protein.coupled.receptor.signaling.pathway..coupled.to.cyclic.nucleotide.second.messenger	0.141122	0.000122051	0.00314446	62	0.008	0.252685		-0.0110886	0.23667	0.435319	953	0.521	0.991234
G.protein.coupled.serotonin.receptor.activity	0.191235	0.000181342	0.00414046	32	0.009	0.260777		-0.0294814	0.0255608	0.100093	479	0.151	0.955333
G.protein.coupled.serotonin.receptor.signaling.pathway	0.189755	0.000643199	0.010804	27	0.018	0.323631		-0.0275795	0.0535549	0.166753	409	0.254	0.978302
G1.S.transition.of.mitotic.cell.cycle	-0.123901	2.50159e-05	0.000908436	97	0.008	0.252685		-0.0250505	3.69587e-05	0.000703205	2283	0.162	0.955333
G2.M.transition.of.mitotic.cell.cycle	-0.125383	3.81248e-06	0.000188792	114	0.001	0.08765		-0.00967748	0.0653748	0.190084	3062	0.504	0.991234
GABA.A.receptor.complex	-0.0592961	0.38377	0.656471	18	0.565	0.872262		-0.0116833	0.464571	0.653985	327	0.687	0.994068
GABA.ergic.synapse	0.0836512	0.0197221	0.118613	65	0.271	0.674805		-0.0141544	0.00191344	0.0146868	4078	0.304	0.978302
GABA.gated.chloride.ion.channel.activity	-0.137229	0.0997428	0.311341	12	0.329	0.724089		-0.0016759	0.934269	0.967506	202	0.978	0.999685
GABA.receptor.binding	0.0910255	0.274887	0.551364	12	0.38	0.756819		-0.030705	0.0464556	0.151368	351	0.402	0.985467
galactosyltransferase.activity	0.00264303	0.969032	0.992991	18	0.965	0.997726		-0.0220047	0.240841	0.439682	237	0.579	0.991234
galanin.receptor.activity	0.201552	0.0273031	0.144302	10	0.13	0.55118		-0.0382732	0.267391	0.468676	70	0.505	0.991234
gamete.generation	-0.130315	0.0556023	0.220616	18	0.062	0.468443		-0.0714764	1.37232e-06	4.69728e-05	381	0.029	0.857677
gamma.aminobutyric.acid.signaling.pathway	-0.0127035	0.83297	0.933074	23	0.893	0.977782		-0.00680146	0.560186	0.729198	613	0.808	0.99426
gamma.catenin.binding	0.109477	0.189112	0.448993	12	0.222	0.636412		0.0294835	0.000714693	0.00693479	1103	0.069	0.902063
gamma.tubulin.binding	-0.0951674	0.0995469	0.311341	25	0.064	0.468443		-0.00722197	0.566566	0.734385	526	0.778	0.99426
gamma.tubulin.complex	-0.0650383	0.476327	0.740271	10	NA	NA		-0.0640175	0.0024348	0.0176489	187	0.281	0.978302
gap.junction	0.154325	0.0325746	0.15885	16	0.112	0.533722		-0.0131679	0.476372	0.664448	244	0.752	0.99426
gastrulation	-0.0303273	0.622424	0.830601	22	0.603	0.888285		-0.00577634	0.629427	0.778077	583	0.832	0.994939
gastrulation.with.mouth.forming.second	-0.0109304	0.876008	0.951629	17	0.918	0.983952		0.0183423	0.0747969	0.209271	789	0.609	0.991234
GDP.binding	0.0261498	0.506332	0.762553	54	0.583	0.874999		-0.0344642	2.97659e-06	8.85054e-05	1542	0.048	0.887495
GDP.dissociation.inhibitor.activity	0.0346536	0.690634	0.867387	11	0.665	0.910316		0.00769548	0.802568	0.890856	88	0.918	0.995934
gene.silencing.by.miRNA	-0.162182	0.0625115	0.237002	11	NA	NA		-0.0202809	0.338182	0.540605	186	0.544	0.991234
gene.silencing.by.RNA	-0.0176432	0.751009	0.895017	27	0.845	0.963751		0.0363076	0.00360076	0.0234552	537	0.399	0.985042
generation.of.precursor.metabolites.and.energy	0.0403385	0.33877	0.616716	47	0.469	0.818881		-0.0251211	0.00532633	0.0314333	1030	0.217	0.97695
germ.cell.development	-0.127633	0.0111727	0.0824629	33	0.079	0.494134		0.00105592	0.893753	0.945112	1341	0.952	0.995934
glial.cell.differentiation	0.138856	0.0720246	0.258496	14	0.08	0.494134		-0.000750813	0.934625	0.967506	999	0.983	0.999685
glial.cell.projection	-0.0606606	0.506509	0.762553	10	NA	NA		-0.00697671	0.752063	0.861879	171	0.771	0.99426
global.genome.nucleotide.excision.repair	-0.0679168	0.281288	0.558995	21	0.22	0.635878		-0.0501477	0.0025538	0.0182333	302	0.014	0.815583
glucocorticoid.biosynthetic.process	-0.197401	0.0306416	0.15353	10	NA	NA		0.0226048	0.269526	0.470992	199	0.575	0.991234
glucocorticoid.receptor.binding	0.089303	0.231094	0.500375	15	0.212	0.633686		0.00120928	0.91717	0.957644	618	0.957	0.995934
gluconeogenesis	0.180232	3.53739e-05	0.00119363	44	0.026	0.37359		-0.0192119	0.0214276	0.0879602	1201	0.201	0.972086
glucose.6.phosphate.metabolic.process	-0.0858009	0.324417	0.604006	11	0.38	0.756819		0.0148695	0.434926	0.629022	230	0.789	0.99426
glucose.binding	0.0467885	0.591016	0.812673	11	0.715	0.921614		-0.0550751	0.0250552	0.0985819	138	0.173	0.962125
glucose.homeostasis	0.023307	0.41629	0.687314	102	0.526	0.848668		-0.0229704	1.87137e-05	0.000397127	2930	0.254	0.978302
glucose.metabolic.process	0.0474571	0.232138	0.501212	53	0.238	0.652407		-0.00591329	0.509627	0.691502	1041	0.761	0.99426
glucose.transmembrane.transport	0.108609	0.0778236	0.271861	22	0.22	0.635878		-0.0328458	0.113167	0.273053	194	0.428	0.989697
glucose.transmembrane.transporter.activity	0.137544	0.114179	0.338277	11	0.243	0.655202		-0.0900715	0.0029217	0.020033	91	0.272	0.978302
glucuronosyltransferase.activity	0.218227	0.00250868	0.0304637	16	0.162	0.585538		0.0145722	0.372907	0.572355	312	0.619	0.991544
glutamate.binding	0.0694674	0.446821	0.715853	10	NA	NA		0.014808	0.328124	0.529822	364	0.482	0.991234
glutamate.metabolic.process	0.094035	0.25933	0.532345	12	0.338	0.730147		-0.0379919	0.0992554	0.250925	157	0.305	0.978302
glutamate.receptor.activity	0.197004	0.00636479	0.0593479	16	0.116	0.533722		0.0301949	3.0028e-05	0.000595756	1603	0.165	0.955333
glutamate.receptor.signaling.pathway	0.0697939	0.333746	0.611667	16	0.56	0.870284		-0.000611688	0.934979	0.967506	1492	0.971	0.998714
glutamate.secretion	0.0774519	0.171638	0.425801	26	0.28	0.68601		-0.019102	0.0436847	0.145213	933	0.388	0.984478
glutamatergic.synapse	0.0679764	3.58341e-05	0.00119583	314	0.2	0.627064		-0.00149494	0.528786	0.707549	15888	0.863	0.994939
glutamine.metabolic.process	0.045643	0.502586	0.760387	18	0.571	0.872314		0.0273719	0.104802	0.26034	293	0.343	0.980215
glutathione.binding	0.160419	0.0789656	0.273495	10	0.129	0.55118		0.0245158	0.252106	0.451343	182	0.387	0.984478
glutathione.biosynthetic.process	0.15545	0.0440148	0.192344	14	0.059	0.462761		-0.0675219	0.000973169	0.00876244	199	0.098	0.952057
glutathione.derivative.biosynthetic.process	0.165913	0.0102086	0.0778506	20	0.178	0.602964		-0.0269176	0.151358	0.327963	237	0.336	0.980215
glutathione.metabolic.process	0.188164	0.000146633	0.00357552	34	0.012	0.28427		0.0507464	0.000831738	0.00773906	362	0.091	0.952057
glutathione.peroxidase.activity	0.118144	0.067382	0.248	20	0.207	0.629984		-0.00957972	0.587864	0.750658	267	0.72	0.99426
glutathione.transferase.activity	0.149362	0.0113139	0.0829612	24	0.19	0.616226		-0.00841572	0.629608	0.778117	274	0.779	0.99426
glycerol.metabolic.process	0.0405092	0.627024	0.833471	12	0.737	0.930472		-0.0228235	0.190892	0.380119	274	0.654	0.993643
glycerolipid.metabolic.process	-0.179111	0.0498316	0.205994	10	0.104	0.527676		-0.0527278	1.44893e-05	0.000323271	565	0.042	0.880536
glycerophospholipid.catabolic.process	-0.057082	0.459584	0.727738	14	0.516	0.844977		-0.00796473	0.732143	0.848139	154	0.845	0.994939
glycine.binding	0.115614	0.165494	0.418262	12	0.123	0.543121		-0.0211111	0.140954	0.312475	406	0.346	0.980215
glycogen.biosynthetic.process	0.147553	0.0259707	0.140862	19	0.099	0.524311		-0.0398385	0.00507759	0.0302759	413	0.114	0.952057
glycogen.catabolic.process	0.129846	0.0816436	0.27945	15	0.228	0.644132		-0.0213627	0.203243	0.394823	296	0.587	0.991234
glycogen.metabolic.process	0.0409295	0.478719	0.742619	25	0.423	0.785507		-0.0348815	0.00132637	0.0110814	708	0.299	0.978302
glycolytic.process	0.122883	0.0178946	0.110767	31	0.146	0.565609		-0.0280625	0.0269578	0.103945	519	0.399	0.985042
glycoprotein.catabolic.process	0.00603224	0.947332	0.981507	10	NA	NA		0.027859	0.243728	0.442524	146	0.45	0.99065
glycoprotein.metabolic.process	0.0247268	0.786562	0.910866	10	NA	NA		-0.0222609	0.103743	0.25845	446	0.67	0.993993
glycosaminoglycan.binding	-0.0199445	0.735203	0.889582	24	0.762	0.940032		-0.0204322	0.0671358	0.193621	671	0.249	0.978302
glycosaminoglycan.biosynthetic.process	0.0302061	0.508635	0.762953	40	0.704	0.921614		0.0273708	1.44868e-05	0.000323271	2111	0.144	0.952057
glycosaminoglycan.catabolic.process	-0.00437689	0.939618	0.978629	25	0.962	0.995952		0.0295938	0.000121502	0.00177763	1414	0.227	0.978302
glycosaminoglycan.metabolic.process	0.0650232	0.476429	0.740271	10	NA	NA		0.0499374	0.00195374	0.0149274	321	0.233	0.978302
glycosphingolipid.metabolic.process	-0.000426523	0.992647	0.999237	39	0.999	1		-0.0288396	0.00240065	0.0174796	927	0.148	0.955333
GMP.metabolic.process	-0.00835396	0.927109	0.974653	10	NA	NA		-0.03315	0.00684077	0.0376857	556	0.278	0.978302
Golgi.apparatus	-0.000294787	0.976738	0.994208	860	0.987	1		-0.00879256	1.56285e-05	0.000344267	22263	0.499	0.991234
Golgi.associated.vesicle	-0.0563643	0.449745	0.718423	15	0.395	0.765968		-0.0139736	0.33644	0.538721	395	0.595	0.991234
Golgi.associated.vesicle.membrane	0.141889	0.0371471	0.172734	18	0.042	0.412471		-0.0374179	0.020109	0.0841823	322	0.185	0.966137
Golgi.cis.cisterna	0.192695	0.00761482	0.0668526	16	0.219	0.635878		-0.00287964	0.820086	0.901409	521	0.942	0.995934
Golgi.cisterna	0.0835487	0.36023	0.637738	10	NA	NA		-0.037746	0.0311456	0.115485	272	0.44	0.989697
Golgi.cisterna.membrane	0.0449259	0.167615	0.421581	79	0.344	0.732092		-0.0133967	0.0731187	0.206236	1501	0.668	0.993993
Golgi.lumen	0.000461859	0.98799	0.998729	89	0.99	1		0.00356716	0.532068	0.710029	2586	0.77	0.99426
Golgi.membrane	0.0266749	0.0319007	0.156749	558	0.18	0.604483		-0.00187321	0.479148	0.666893	12580	0.884	0.994939
Golgi.organization	0.0229843	0.439056	0.708794	95	0.627	0.892877		-0.019623	0.000792284	0.00748268	2463	0.378	0.980897
Golgi.ribbon.formation	0.111707	0.18026	0.437235	12	0.127	0.547678		-0.00977493	0.423107	0.617986	561	0.748	0.99426
Golgi.stack	0.023471	0.651086	0.849609	31	0.642	0.902145		-0.0231833	0.0317867	0.116936	717	0.197	0.971127
Golgi.to.endosome.transport	0.0785793	0.366802	0.640979	11	NA	NA		0.00843632	0.557281	0.727597	404	0.805	0.99426
Golgi.to.plasma.membrane.protein.transport	0.0633675	0.254432	0.526682	27	0.276	0.682891		-0.0596503	4.49082e-08	2.44726e-06	703	0.024	0.856986
Golgi.to.plasma.membrane.transport	0.0196438	0.76103	0.900065	20	0.799	0.949492		0.0106808	0.23792	0.436506	1022	0.686	0.994068
Golgi.transport.complex	-0.0234376	0.797441	0.914743	10	0.858	0.966629		0.0122039	0.582745	0.746509	169	0.758	0.99426
gonad.development	0.024451	0.778849	0.90809	11	0.8	0.949492		-0.00925102	0.460753	0.650905	531	0.777	0.99426
GPI.anchor.biosynthetic.process	-0.10427	0.0834509	0.283599	23	0.1	0.525637		-0.0587474	2.47216e-06	7.77586e-05	537	0.023	0.856986
grooming.behavior	-0.0187081	0.80849	0.919407	14	0.799	0.949492		-0.0381286	0.0277428	0.106426	278	0.433	0.989697
growth.cone	0.0322803	0.236179	0.506495	113	0.373	0.755325		0.000505119	0.89857	0.947329	5435	0.984	0.999685
growth.factor.activity	-0.0402696	0.085895	0.288001	153	0.24	0.65449		-0.0048041	0.2612	0.461445	4652	0.832	0.994939
growth.factor.binding	-0.0792858	0.132856	0.370036	30	0.271	0.674805		-0.0232173	0.00412645	0.0261582	1279	0.365	0.980796
growth.hormone.receptor.signaling.pathway	0.00067184	0.99357	0.999237	12	0.999	1		-0.099577	1.33518e-07	6.48134e-06	234	0	0.401026
growth.plate.cartilage.chondrocyte.morphogenesis	0.149238	0.0283737	0.146996	18	0.09	0.506485		-0.00536802	0.767524	0.87163	253	0.858	0.994939
GTP.binding	0.0116516	0.485657	0.746683	304	0.676	0.911911		-0.0220146	6.56769e-10	6.18787e-08	6757	0.175	0.962125
GTP.dependent.protein.binding	-0.0103508	0.866533	0.947002	22	0.864	0.9681		-0.0292825	0.0111315	0.0543841	628	0.345	0.980215
GTP.metabolic.process	0.0227218	0.794124	0.912597	11	NA	NA		-0.0410721	0.0432527	0.144545	202	0.192	0.971127
GTP.Rho.binding	-0.0121594	0.850678	0.93917	20	0.873	0.969886		-0.0142611	0.348965	0.550682	360	0.476	0.991234
GTPase.activating.protein.binding	0.0413727	0.579028	0.804897	15	0.576	0.872712		-0.0447393	0.000516459	0.00538854	503	0.275	0.978302
GTPase.activator.activity	0.0524108	0.00603496	0.057242	232	0.108	0.530481		-0.0102828	0.00182689	0.0142223	7930	0.488	0.991234
GTPase.activity	0.0347299	0.0575782	0.225638	253	0.293	0.693157		-0.0286708	4.30657e-13	8.214e-11	5451	0.147	0.955333
GTPase.binding	0.101837	0.0461957	0.196809	32	0.1	0.525637		-0.0145415	0.177763	0.364053	718	0.437	0.989697
GTPase.inhibitor.activity	0.019476	0.800791	0.915903	14	0.851	0.964404		-0.0489194	0.000562492	0.00577934	415	0.316	0.979216
GTPase.regulator.activity	0.0347954	0.652137	0.850078	14	0.624	0.892877		0.0534708	0.00202527	0.0154213	278	0.142	0.952057
guanyl.nucleotide.exchange.factor.activity	0.047984	0.126387	0.360714	85	0.264	0.669742		-0.0263417	1.3122e-05	0.000298731	2304	0.203	0.973305
hair.cycle	0.347301	1.51028e-06	8.59509e-05	16	0.003	0.156985		0.0794223	0.00100539	0.00891908	143	0.149	0.955333
hair.follicle.development	0.0764002	0.1127	0.335983	36	0.157	0.576983		0.000894684	0.907961	0.952862	1400	0.967	0.997925
hair.follicle.morphogenesis	0.0536226	0.353386	0.632957	25	0.397	0.766877		-0.00562556	0.581222	0.745352	804	0.852	0.994939
head.development	-0.0279368	0.727252	0.885381	13	0.756	0.938487		-0.0236873	0.0405017	0.137886	625	0.45	0.99065
heart.contraction	0.0562884	0.517975	0.768897	11	0.585	0.875378		0.0183452	0.183938	0.371775	438	0.629	0.991544
heart.development	-0.00793758	0.715213	0.879145	178	0.848	0.963923		-0.0153988	1.68258e-05	0.000368564	6703	0.288	0.978302
heart.looping	-0.0584602	0.123673	0.356127	58	0.203	0.627064		-0.0261857	9.12007e-05	0.00143067	1876	0.402	0.985467
heart.morphogenesis	-0.0596697	0.21541	0.480045	36	0.219	0.635878		-0.0228277	0.00544721	0.0318681	1242	0.221	0.97695
heart.trabecula.formation	-0.107971	0.214959	0.479944	11	0.267	0.672487		-0.0221884	0.132339	0.300918	384	0.353	0.980215
heat.shock.protein.binding	0.0142048	0.718104	0.879721	54	0.732	0.928431		-0.0358133	5.28162e-06	0.000144162	1355	0.223	0.977774
helicase.activity	-0.0649442	0.210793	0.475312	31	0.337	0.728885		-0.0120576	0.25156	0.45078	756	0.708	0.99426
hematopoietic.progenitor.cell.differentiation	-0.103166	0.00572488	0.0555115	60	0.01	0.263609		-0.0163824	0.0235608	0.094171	1603	0.475	0.991234
hematopoietic.stem.cell.differentiation	-0.123055	0.124464	0.357751	13	0.22	0.635878		-0.0776086	3.02659e-10	3.19837e-08	550	0.028	0.857677
hematopoietic.stem.cell.proliferation	-0.050761	0.526253	0.774088	13	0.558	0.869102		-0.0911196	4.55517e-22	4.19076e-19	940	0.06	0.902063
heme.binding	0.0785832	0.00263188	0.0315577	123	0.36	0.746399		-0.0122944	0.0825341	0.223405	1674	0.568	0.991234
heme.biosynthetic.process	-0.0279832	0.664841	0.854503	20	0.658	0.908861		0.03089	0.0373907	0.130738	379	0.294	0.978302
hemidesmosome.assembly	0.301269	0.000301735	0.00590061	12	0.003	0.156985		0.0342712	0.0471068	0.152758	280	0.284	0.978302
hemoglobin.complex	0.131849	0.14878	0.391511	10	0.472	0.820849		0.0522911	0.455162	0.646276	17	0.640641	0.993185
hemopoiesis	-0.0414237	0.301553	0.581599	52	0.346	0.732092		0.0168318	0.00891076	0.0459796	2030	0.452	0.99065
heparan.sulfate.proteoglycan.binding	0.0265441	0.713159	0.878398	16	0.767	0.94102		0.00542315	0.651367	0.793389	580	0.803	0.99426
heparan.sulfate.proteoglycan.biosynthetic.process	0.118048	0.0500264	0.205994	23	0.115	0.533722		0.0322353	0.000617363	0.00621736	944	0.305	0.978302
heparan.sulfate.proteoglycan.biosynthetic.process..polysaccharide.chain.biosynthetic.process	0.0794164	0.361719	0.638534	11	0.262	0.667082		0.0196482	0.117552	0.278471	530	0.322	0.979782
heparan.sulfate.sulfotransferase.activity	0.119379	0.170357	0.424001	11	0.272	0.676335		0.0462052	0.000318178	0.00368926	507	0.282	0.978302
heparin.binding	0.0266995	0.247278	0.519153	158	0.442	0.795101		-0.0191528	3.05629e-06	9.05309e-05	5059	0.273	0.978302
hepatocyte.apoptotic.process	0.111838	0.220682	0.487792	10	0.343	0.731928		-0.0526841	0.000681072	0.00670544	347	0.126	0.952057
hepatocyte.differentiation	0.0174538	0.827503	0.931032	13	0.769	0.94102		-0.0130479	0.275316	0.477695	584	0.715	0.99426
hepatocyte.growth.factor.receptor.signaling.pathway	-0.119504	0.151717	0.396232	12	0.211	0.633686		-0.0379553	0.00885827	0.045739	397	0.349	0.980215
heterochromatin	-0.154906	0.010122	0.0776485	23	0.067	0.479392		-0.0422213	0.00168628	0.0134148	462	0.319	0.979216
heterophilic.cell.cell.adhesion.via.plasma.membrane.cell.adhesion.molecules	0.0151329	0.737446	0.889607	41	0.758	0.939063		0.0125194	0.00573333	0.0331494	4132	0.614	0.991234
heterotrimeric.G.protein.complex	0.0411152	0.485664	0.746683	24	0.549	0.861977		-0.0299947	0.0165731	0.0730149	533	0.387	0.984478
heterotypic.cell.cell.adhesion	-0.0209055	0.701817	0.873948	28	0.83	0.957753		0.00732235	0.492642	0.677355	734	0.733	0.99426
hexose.transmembrane.transport	0.115896	0.147918	0.38978	13	0.341	0.731221		-0.0126136	0.572445	0.738332	167	0.828	0.994939
high.density.lipoprotein.particle	0.0490368	0.459304	0.727597	19	0.635	0.89843		-0.0175556	0.294925	0.498608	297	0.578	0.991234
high.density.lipoprotein.particle.assembly	0.030336	0.715941	0.879172	12	0.72	0.924659		-0.0130824	0.50558	0.688008	216	0.818	0.994939
high.density.lipoprotein.particle.binding	0.114374	0.210391	0.47525	10	NA	NA		-0.0359861	0.0875355	0.231808	188	0.398	0.985042
high.density.lipoprotein.particle.remodeling	0.116592	0.096041	0.305205	17	0.356	0.743824		-0.03126	0.123955	0.28819	202	0.471	0.991234
high.voltage.gated.calcium.channel.activity	0.204426	0.0251799	0.13788	10	NA	NA		0.00997584	0.48931	0.674959	401	0.832	0.994939
hindbrain.development	-0.0326728	0.631288	0.835508	18	0.601	0.887576		-0.0137775	0.133819	0.303411	991	0.606	0.991234
hippo.signaling	-0.0515622	0.362808	0.638978	26	0.534	0.851866		-0.0487203	7.14941e-07	2.70089e-05	866	0.05	0.887495
hippocampal.mossy.fiber.to.CA3.synapse	0.103267	0.0502872	0.206399	30	0.15	0.569156		0.00304538	0.667247	0.804544	1673	0.838	0.994939
hippocampus.development	0.035441	0.338527	0.616716	61	0.377	0.755724		0.0231712	5.3354e-06	0.000144871	3261	0.312	0.979216
histone.acetylation	-0.10845	0.0286498	0.147624	34	0.133	0.55118		-0.0191032	0.0391122	0.134739	976	0.398	0.985042
histone.acetyltransferase.activity	-0.164402	0.00530536	0.0527666	24	0.053	0.449923		-0.00639166	0.504795	0.687358	911	0.747	0.99426
histone.acetyltransferase.binding	-0.138465	0.0112165	0.0825644	28	0.059	0.462761		-0.015259	0.0558693	0.171534	1316	0.706	0.99426
histone.acetyltransferase.complex	-0.134878	0.0221821	0.128346	24	0.096	0.519407		-0.0352005	0.000790645	0.00747172	760	0.321	0.979216
histone.binding	-0.0954138	0.000327516	0.0062441	119	0.115	0.533722		-0.0292586	5.85048e-09	4.39911e-07	3347	0.284	0.978302
histone.deacetylase.activity	-0.048197	0.491442	0.752256	17	0.523	0.848121		-0.039147	0.000151759	0.00208752	783	0.209	0.97695
histone.deacetylase.binding	-0.0760887	0.00737414	0.0655422	104	0.121	0.542119		-0.0326032	2.75451e-12	4.48756e-10	3896	0.22	0.97695
histone.deacetylase.complex	-0.0444933	0.383744	0.656471	32	0.428	0.788113		-0.0342177	1.78912e-06	5.89093e-05	1635	0.167	0.955333
histone.deacetylation	-0.0794875	0.108742	0.327967	34	0.19	0.616226		-0.0600953	1.3016e-11	1.83396e-09	1062	0.026	0.857677
histone.demethylase.activity	-0.120745	0.11774	0.344811	14	0.287	0.689234		-0.017818	0.234238	0.432555	372	0.477	0.991234
histone.demethylase.activity..H3.K9.specific.	-0.198595	0.0172091	0.108052	12	0.101	0.52616		-0.0576513	0.000146606	0.00203454	362	0.044	0.887495
histone.deubiquitination	0.0718819	0.388553	0.660229	12	0.442	0.795101		-0.0171843	0.208628	0.401544	447	0.524	0.991234
histone.exchange	-0.15013	0.100167	0.311531	10	NA	NA		-0.0138033	0.460009	0.650219	239	0.885	0.994939
histone.H2A.acetylation	-0.0757578	0.326352	0.605165	14	0.386	0.761145		-0.0302421	0.0311473	0.115485	424	0.515	0.991234
histone.H2A.monoubiquitination	-0.106077	0.223113	0.48977	11	NA	NA		-0.103468	7.43695e-13	1.32175e-10	401	0.055	0.888636
histone.H3.acetylation	-0.0726619	0.126184	0.360404	37	0.293	0.693157		-0.0461157	7.05426e-08	3.71477e-06	1144	0.062	0.902063
histone.H3.deacetylation	-0.100383	0.151866	0.396347	17	0.223	0.637195		-0.0536806	1.14213e-07	5.61729e-06	816	0.078	0.924182
histone.H3.K4.methylation	-0.110033	0.0808872	0.277359	21	0.104	0.527676		-0.0698378	2.45184e-06	7.74681e-05	380	0.041	0.880536
histone.H3.K4.trimethylation	-0.0502894	0.530103	0.774922	13	0.595	0.881314		-0.0692778	4.29059e-05	0.000789468	291	0.104	0.952057
histone.H3.K9.demethylation	-0.166527	0.037614	0.173845	13	0.157	0.576983		-0.0581452	8.1958e-05	0.00130798	383	0.048	0.887495
histone.H4.acetylation	-0.0983939	0.0579706	0.22671	31	0.161	0.584939		-0.042037	6.94197e-06	0.000180054	957	0.11	0.952057
histone.H4.deacetylation	-0.082803	0.364534	0.639961	10	NA	NA		-0.0650607	1.74308e-08	1.09485e-06	627	0.092	0.952057
histone.H4.K16.acetylation	-0.148873	0.0537628	0.21493	14	0.14	0.559681		-0.0477709	0.0015829	0.0128007	365	0.366	0.980796
histone.H4.K5.acetylation	-0.0381503	0.633864	0.836321	13	0.723	0.925799		-4.61009e-05	0.997279	0.998556	457	0.999	1
histone.H4.K8.acetylation	-0.0381503	0.633864	0.836321	13	0.723	0.925799		-4.61009e-05	0.997279	0.998556	457	0.999	1
histone.lysine.methylation	-0.00416941	0.961807	0.990093	11	0.954	0.993974		-0.0115042	0.468078	0.657336	332	0.739	0.99426
histone.lysine.N.methyltransferase.activity	0.0414822	0.590972	0.812673	14	0.583	0.874999		0.00849342	0.587739	0.750632	340	0.764	0.99426
histone.methylation	-0.100246	0.178856	0.435176	15	0.243	0.655202		-0.0095091	0.490003	0.675392	440	0.685	0.994068
histone.methyltransferase.activity	-0.0420317	0.629285	0.834306	11	0.708	0.921614		-0.0216067	0.287637	0.490047	202	0.401	0.985467
histone.methyltransferase.activity..H3.K9.specific.	-0.154508	0.090649	0.294166	10	NA	NA		-0.110509	1.14466e-22	1.27875e-19	657	0.063	0.902063
histone.methyltransferase.complex	-0.107696	0.0412035	0.185489	30	0.239	0.65449		-0.0692205	7.24473e-17	2.98178e-14	1217	0.027	0.857677
histone.monoubiquitination	-0.0366467	0.660235	0.854503	12	NA	NA		0.0255009	0.16785	0.350865	244	0.395	0.985042
histone.phosphorylation	-0.0973438	0.242941	0.513488	12	0.189	0.615831		-0.110452	6.40216e-11	8.01038e-09	292	0	0.401026
HMG.box.domain.binding	-0.133718	0.0729493	0.260446	15	0.205	0.62881		-0.0251265	0.000745437	0.0071394	1511	0.341	0.980215
homeostasis.of.number.of.cells	0.00105098	0.988755	0.999237	15	0.994	1		-0.0363142	0.0172362	0.0753209	359	0.427	0.989697
homeostasis.of.number.of.cells.within.a.tissue	-0.0480145	0.379212	0.654862	28	0.346	0.732092		-0.0347911	0.00234757	0.0171692	639	0.457	0.99075
homeostatic.process	-0.0602115	0.470138	0.734989	12	0.48	0.824941		0.0117743	0.385803	0.58387	453	0.668	0.993993
homophilic.cell.adhesion.via.plasma.membrane.adhesion.molecules	0.0934247	0.000295949	0.00587736	126	0.067	0.479392		0.0398924	7.99319e-32	1.78591e-28	7458	0.012	0.812468
hormone.activity	-0.0383773	0.221523	0.488059	85	0.476	0.820883		-0.0142326	0.0479932	0.154766	1620	0.564	0.991234
hormone.binding	0.213607	0.0103986	0.0787986	12	0.003	0.156985		-0.051096	0.0061315	0.0348461	240	0.217	0.97695
hormone.biosynthetic.process	-0.00660014	0.936897	0.97798	12	0.955	0.994425		0.0501287	0.00175809	0.0138382	325	0.068	0.902063
hormone.mediated.signaling.pathway	0.0141945	0.74186	0.890092	45	0.814	0.950978		8.45084e-06	0.999181	0.999565	1235	0.999	1
hormone.metabolic.process	-0.148897	0.0740893	0.263774	12	0.104	0.527676		-0.0770171	8.21324e-07	3.0296e-05	342	0.029	0.857677
host.cell	0.00182919	0.964317	0.990765	50	0.983	1		-0.056943	1.19934e-08	7.81572e-07	838	0.051	0.887495
Hsp70.protein.binding	0.0152556	0.74168	0.890092	39	0.701	0.921614		-0.0178512	0.0811874	0.220923	798	0.545	0.991234
Hsp90.protein.binding	0.0119371	0.799028	0.915198	38	0.887	0.974866		-0.0215686	0.021691	0.0886922	948	0.569	0.991234
humoral.immune.response	-0.107612	0.00578122	0.055807	55	0.088	0.503308		-0.0342877	4.27912e-05	0.000788285	1193	0.051	0.887495
hyaluronan.catabolic.process	-0.195843	0.0144834	0.0967166	13	0.067	0.479392		-0.0397734	0.0258219	0.100762	262	0.356	0.980215
hyaluronan.metabolic.process	-0.00450428	0.958743	0.98829	11	0.972	0.998486		-0.0262921	0.188139	0.377034	209	0.56	0.991234
hyaluronic.acid.binding	-0.0432513	0.513959	0.766672	19	0.575	0.872706		-0.0401278	0.0068522	0.0377354	379	0.206	0.975145
hydrogen.peroxide.catabolic.process	0.110967	0.0501757	0.206164	26	0.348	0.732786		-0.0375963	0.061076	0.181804	207	0.437	0.989697
hydrolase.activity	-3.59286e-05	0.999171	0.999433	70	1	1		0.0100743	0.141689	0.313664	1787	0.511	0.991234
hydrolase.activity..acting.on.ester.bonds	0.0535777	0.557392	0.793925	10	NA	NA		0.0196405	0.329029	0.530955	206	0.6	0.991234
hypothalamus.development	-0.0428261	0.592876	0.813624	13	0.678	0.912097		-0.0025779	0.86336	0.929316	372	0.94	0.995934
I.band	0.224257	0.00136812	0.0194651	17	0.001	0.08765		-0.0108043	0.3579	0.559365	605	0.76	0.99426
I.kappaB.kinase.NF.kappaB.signaling	-0.17455	4.29149e-06	0.000207132	58	0.002	0.13749		-0.011988	0.170402	0.354159	1095	0.462	0.991234
I.kappaB.phosphorylation	-0.216939	0.00926154	0.0736583	12	0.044	0.415806		-0.0212619	0.167943	0.351013	351	0.484	0.991234
I.SMAD.binding	-0.0391552	0.668082	0.854503	10	NA	NA		-0.0335653	0.0394973	0.13553	314	0.419	0.98601
identical.protein.binding	0.00280361	0.769044	0.904109	971	0.874	0.969886		-0.0127592	1.25904e-10	1.45862e-08	23591	0.234	0.978302
IgG.binding	-0.0656965	0.471876	0.735962	10	NA	NA		-0.00683546	0.802177	0.890797	112	0.895	0.994939
immune.response	-0.082068	1.87921e-06	0.000103847	286	0.145	0.564229		-0.00765888	0.0939833	0.242158	4056	0.746	0.99426
immune.system.process	0.00448284	0.933414	0.976554	29	0.933	0.98765		-0.00900755	0.533455	0.711031	399	0.764	0.99426
immunoglobulin.mediated.immune.response	-0.267122	0.000853182	0.0135549	13	0.063	0.468443		0.0139317	0.517483	0.697249	180	0.775	0.99426
immunological.synapse	-0.0525189	0.303889	0.583511	32	0.623	0.892877		-0.0156742	0.122239	0.285987	813	0.686	0.994068
immunological.synapse.formation	0.0491985	0.572044	0.799972	11	0.63	0.894968		0.0510666	0.000227765	0.00286584	435	0.332	0.980206
import.into.nucleus	0.0178278	0.823866	0.929514	13	0.848	0.963923		-0.0540708	1.8546e-06	6.06818e-05	650	0.037	0.868455
in.utero.embryonic.development	-0.0260837	0.212065	0.477335	193	0.433	0.790676		-0.0106618	0.00425149	0.0267149	6156	0.696	0.99426
inactivation.of.MAPK.activity	-0.0498888	0.387906	0.660011	25	0.493	0.832275		-0.0428372	0.000171553	0.00229128	643	0.104	0.952057
inclusion.body	-0.00633755	0.927914	0.975231	17	0.936	0.988141		-0.0481638	0.0144744	0.066048	215	0.255	0.978302
induction.of.positive.chemotaxis	-0.0436621	0.60046	0.817747	12	0.633	0.897411		-0.00791616	0.571306	0.737899	427	0.843	0.994939
inflammatory.response	-0.0595236	0.000147587	0.00357552	346	0.265	0.670339		-0.0166091	3.69e-05	0.000702942	5263	0.366	0.980796
inflammatory.response.to.antigenic.stimulus	-0.0993594	0.2148	0.479944	13	0.175	0.60152		-0.0471261	0.00384247	0.0247922	314	0.286	0.978302
inhibitory.extracellular.ligand.gated.ion.channel.activity	-0.136506	0.116935	0.342978	11	0.271	0.674805		-0.0129035	0.530586	0.70902	197	0.692	0.99426
inhibitory.synapse	0.114341	0.138511	0.378478	14	0.253	0.659984		0.00962482	0.439006	0.632757	540	0.795	0.99426
innate.immune.response	-0.0557237	0.000275673	0.00553233	363	0.251	0.658846		-0.017532	3.14387e-05	0.000618595	4798	0.437	0.989697
innate.immune.response.in.mucosa	0.0292572	0.736857	0.889607	11	NA	NA		-0.0375315	0.109072	0.266879	152	0.348	0.980215
inner.cell.mass.cell.proliferation	-0.209038	0.0121599	0.0868879	12	NA	NA		-0.0374919	0.107142	0.264126	154	0.415	0.985625
inner.dynein.arm.assembly	-0.189611	0.0294304	0.149428	11	0.186	0.610024		0.0266795	0.107323	0.264419	304	0.559	0.991234
inner.ear.development	0.000572499	0.989881	0.999237	41	0.991	1		-0.0081618	0.222861	0.418986	1874	0.688	0.994068
inner.ear.morphogenesis	0.0781383	0.0470584	0.198489	54	0.164	0.589094		0.0100193	0.0891016	0.234263	2425	0.669	0.993993
inner.ear.receptor.cell.stereocilium.organization	0.110552	0.138209	0.378085	15	0.218	0.635878		-0.00639388	0.641405	0.786351	443	0.863	0.994939
innervation	0.0284908	0.667238	0.854503	19	0.692	0.918997		-0.00226597	0.832644	0.908932	727	0.937	0.995934
Ino80.complex	-0.0202435	0.800473	0.915903	13	0.819	0.953325		-0.0752777	1.29557e-05	0.000296862	280	0.133	0.952057
inorganic.anion.exchanger.activity	0.0283874	0.723033	0.882781	13	0.787	0.947763		-0.0108553	0.38365	0.582269	538	0.766	0.99426
inorganic.anion.transport	0.0584794	0.331633	0.609406	23	0.47	0.819811		0.000589139	0.959722	0.980446	614	0.974	0.999302
inositol.1.4.5.trisphosphate.binding	0.0986695	0.218001	0.484065	13	0.269	0.674134		-0.054905	0.000136282	0.00192826	403	0.072	0.903031
inositol.phosphate.biosynthetic.process	0.024849	0.775345	0.905757	11	0.805	0.950978		0.0288321	0.0942825	0.242672	281	0.459	0.991234
inositol.phosphate.dephosphorylation	0.0379921	0.62257	0.830601	14	0.65	0.904325		-0.0267617	0.134433	0.304217	261	0.523	0.991234
inositol.phosphate.mediated.signaling	0.029961	0.719302	0.880298	12	0.731	0.928246		0.00545275	0.70584	0.830682	400	0.908	0.995797
inositol.phosphate.metabolic.process	0.0255792	0.552792	0.790324	45	0.644	0.903103		-0.00702796	0.420099	0.614776	1102	0.763	0.99426
inositol.trisphosphate.biosynthetic.process	0.0576846	0.424353	0.694568	16	0.356	0.743824		-0.0352468	0.00524189	0.0310542	524	0.124	0.952057
insulin.like.growth.factor.binding	-0.00145164	0.984469	0.997815	15	0.994	1		-0.0265109	0.0906211	0.236692	340	0.485	0.991234
insulin.like.growth.factor.receptor.binding	-0.0551191	0.475164	0.739813	14	0.456	0.805815		-0.071641	8.98558e-08	4.57767e-06	465	0.011	0.792811
insulin.like.growth.factor.receptor.signaling.pathway	-0.147674	0.0652308	0.24195	13	0.142	0.561276		-0.0806919	4.08878e-11	5.24168e-09	559	0	0.401026
insulin.receptor.binding	-0.115143	0.0677559	0.248391	21	0.058	0.457991		-0.0640113	1.71927e-09	1.46166e-07	740	0.001	0.401026
insulin.receptor.signaling.pathway	-0.0234333	0.471674	0.735962	79	0.649	0.904325		-0.0312653	1.56952e-06	5.25639e-05	1983	0.137	0.952057
insulin.receptor.substrate.binding	-0.154021	0.0769059	0.271023	11	NA	NA		-0.0878161	1.3979e-07	6.7479e-06	300	0.012	0.812468
insulin.secretion	0.0987225	0.0571382	0.224335	31	0.102	0.527451		-0.00607237	0.540441	0.716048	850	0.814	0.994939
integral.component.of.endoplasmic.reticulum.membrane	0.0450367	0.119861	0.349947	100	0.244	0.655202		-0.00441821	0.525004	0.70451	1738	0.838	0.994939
integral.component.of.Golgi.membrane	-0.00572207	0.882281	0.954366	56	0.927	0.986858		-0.0099361	0.245937	0.444604	1142	0.636	0.992719
integral.component.of.lumenal.side.of.endoplasmic.reticulum.membrane	0.107397	0.0453214	0.195266	29	0.829	0.957337		-0.00100713	0.957279	0.978982	236	0.983	0.999685
integral.component.of.membrane	0.0514486	1.89569e-19	4.51766e-17	3166	0.008	0.252685		-0.00432618	0.000656563	0.00652392	78230	0.638	0.993185
integral.component.of.mitochondrial.inner.membrane	-0.0344494	0.520832	0.771835	29	0.517	0.845036		-0.0105689	0.445536	0.637994	435	0.723	0.99426
integral.component.of.mitochondrial.outer.membrane	0.03422	0.615216	0.826866	18	0.517	0.845036		-0.046779	0.00734559	0.0399183	274	0.139	0.952057
integral.component.of.nuclear.inner.membrane	0.00289045	0.970128	0.993013	14	0.977	0.999241		0.000243628	0.990577	0.995161	196	0.991	0.999685
integral.component.of.peroxisomal.membrane	0.181435	0.0149732	0.0989476	15	0.027	0.374158		-0.0255236	0.196075	0.386565	214	0.244	0.978302
integral.component.of.plasma.membrane	0.0434723	2.58853e-07	1.82779e-05	1267	0.284	0.689234		0.00645674	0.000147056	0.00203897	33741	0.542	0.991234
integral.component.of.postsynaptic.density.membrane	0.121741	0.00428732	0.0452841	46	0.191	0.618325		0.0244749	2.54686e-06	7.98253e-05	3121	0.113	0.952057
integral.component.of.postsynaptic.membrane	0.170151	9.4433e-05	0.00262752	44	0.038	0.403721		0.0105008	0.0825989	0.223459	2300	0.632	0.991698
integral.component.of.postsynaptic.specialization.membrane	0.0911349	0.107736	0.325772	26	0.248	0.658846		-0.0161944	0.0490056	0.156962	1238	0.366	0.980796
integral.component.of.presynaptic.active.zone.membrane	-0.0484538	0.530168	0.774922	14	0.577	0.872732		-0.0401374	0.000111457	0.00167276	775	0.097	0.952057
integral.component.of.presynaptic.membrane	0.101742	0.00790148	0.0680314	57	0.196	0.625052		0.00930257	0.123469	0.287489	2308	0.651	0.993185
integral.component.of.synaptic.vesicle.membrane	0.0763622	0.129007	0.365981	33	0.203	0.627064		0.0157151	0.0859966	0.228934	999	0.607	0.991234
integrator.complex	0.168392	0.0133825	0.0919415	18	0.107	0.530481		-0.0251669	0.164108	0.345749	255	0.424	0.987544
integrin.binding	0.014877	0.567522	0.799524	124	0.809	0.950978		-0.0230892	8.61962e-06	0.000209986	3137	0.186	0.966137
integrin.complex	0.0339804	0.556468	0.793497	25	0.67	0.910316		-0.0180673	0.113006	0.272876	643	0.482	0.991234
integrin.mediated.signaling.pathway	0.0401438	0.203638	0.467008	84	0.419	0.782223		-0.0116859	0.044026	0.146068	2502	0.642	0.993185
intercalated.disc	0.0594161	0.16796	0.421891	45	0.292	0.692192		-0.0266956	0.000302228	0.00353115	1537	0.03	0.857677
intercellular.bridge	-0.0504116	0.200145	0.462997	54	0.369	0.753474		-0.00577194	0.501427	0.68474	1136	0.872	0.994939
interferon.gamma.mediated.signaling.pathway	0.0053679	0.875762	0.951629	71	0.963	0.995952		0.000178247	0.983085	0.992221	1185	0.995	0.999685
interleukin.1.mediated.signaling.pathway	-0.0874824	0.0079787	0.068289	77	0.024	0.35806		-0.023877	0.000149624	0.00206907	2121	0.108	0.952057
interleukin.1.receptor.binding	-0.179736	0.0198806	0.11919	14	0.11	0.530481		-0.0137962	0.597684	0.756109	122	0.758	0.99426
interleukin.12.mediated.signaling.pathway	0.020413	0.651119	0.849609	41	0.675	0.911263		-0.0167859	0.0919486	0.238566	843	0.53	0.991234
interleukin.15.mediated.signaling.pathway	-0.0173748	0.828271	0.931347	13	0.874	0.969886		-0.0354627	0.0203781	0.0849902	357	0.383	0.984084
interleukin.2.mediated.signaling.pathway	-0.03764	0.665528	0.854503	11	0.741	0.933841		-0.0595855	0.00237228	0.0173052	217	0.395	0.985042
interleukin.27.mediated.signaling.pathway	-0.0789196	0.36473	0.639961	11	0.482	0.825949		-0.0861305	0.000110712	0.00166721	168	0.15	0.955333
interleukin.35.mediated.signaling.pathway	-0.127706	0.142457	0.382523	11	0.264	0.669742		-0.0634555	0.0046387	0.0283728	166	0.187	0.967476
interleukin.6.mediated.signaling.pathway	-0.150076	0.0376688	0.173882	16	0.042	0.412471		-0.020658	0.133706	0.303242	440	0.522	0.991234
interleukin.7.mediated.signaling.pathway	0.00479085	0.947099	0.981507	16	0.958	0.995633		-0.0717713	1.2983e-05	0.000296862	308	0.01	0.792811
intermediate.filament	0.261854	1.79764e-18	4.03199e-16	94	0	0		0.0146101	0.175728	0.361962	718	0.627	0.991544
intermediate.filament.cytoskeleton	0.0644792	0.138978	0.378478	44	0.113	0.533722		-0.00651074	0.423914	0.618516	1264	0.785	0.99426
intermediate.filament.cytoskeleton.organization	0.189245	0.00339051	0.0379502	20	0.044	0.415806		0.0228868	0.0981499	0.249597	436	0.471	0.991234
intermediate.filament.organization	0.223258	0.00104057	0.0156826	18	0.015	0.297119		0.048089	0.00277337	0.019346	323	0.264	0.978302
intermembrane.cholesterol.transfer.activity	0.108116	0.147107	0.388922	15	0.185	0.610024		0.0582075	0.00267451	0.018859	222	0.19	0.969527
interstitial.matrix	-0.0397946	0.633115	0.836321	12	0.681	0.913035		-0.0294208	0.0224154	0.090859	503	0.347	0.980215
interstrand.cross.link.repair	-0.226438	5.26874e-07	3.46375e-05	41	0.005	0.203837		0.00738441	0.423301	0.618194	984	0.79	0.99426
intestinal.absorption	0.0482616	0.54682	0.787099	13	0.711	0.921614		0.00935633	0.585818	0.748668	283	0.835	0.994939
intra.Golgi.vesicle.mediated.transport	0.0389892	0.483171	0.745854	27	0.604	0.889011		-0.0193949	0.0494939	0.158077	858	0.388	0.984478
intra.S.DNA.damage.checkpoint	-0.0504892	0.52847	0.774724	13	0.587	0.876127		0.0371767	0.0435068	0.144848	246	0.368	0.980796
intracellular	0.00896743	0.788387	0.911473	75	0.753	0.938487		-0.0120257	0.0967047	0.247054	1601	0.482	0.991234
intracellular.calcium.activated.chloride.channel.activity	0.140073	0.0523905	0.212871	16	0.038	0.403721		0.0370997	0.0368922	0.129691	264	0.314	0.979216
intracellular.cholesterol.transport	0.105268	0.249003	0.520816	10	NA	NA		0.0284345	0.249088	0.447911	137	0.472	0.991234
intracellular.estrogen.receptor.signaling.pathway	-0.0556317	0.401181	0.671807	19	0.461	0.809753		-0.0155304	0.248007	0.446612	462	0.484	0.991234
intracellular.membrane.bounded.organelle	0.0187293	0.116675	0.342744	607	0.214	0.633686		-0.00573548	0.00682708	0.0376235	20331	0.775	0.99426
intracellular.protein.transport	0.057947	0.00132204	0.0190945	260	0.077	0.494134		-0.0126061	0.000691308	0.00676599	6204	0.494	0.991234
intracellular.receptor.signaling.pathway	-0.00231922	0.962675	0.990093	34	0.968	0.998472		-0.0290681	3.10964e-05	0.000614076	1724	0.334	0.980206
intracellular.signal.transduction	-0.0016798	0.91328	0.969754	358	0.959	0.995633		-0.0210059	5.0299e-12	7.89823e-10	9386	0.092	0.952057
intracellular.transport	0.139369	0.0535871	0.214682	16	0.142	0.561276		-0.0468878	0.00343275	0.0226437	325	0.046	0.887495
intracellular.transport.of.virus	0.0238042	0.58068	0.805907	45	0.733	0.928431		-0.0517847	6.82586e-07	2.61658e-05	769	0.091	0.952057
intraciliary.retrograde.transport	0.105033	0.250063	0.522416	10	0.573	0.872314		-0.0254769	0.167381	0.350213	245	0.522	0.991234
intraciliary.transport	0.0830265	0.142827	0.382712	26	0.493	0.832275		-0.0504629	7.90666e-05	0.00128041	511	0.043	0.887495
intraciliary.transport.involved.in.cilium.assembly	0.0851199	0.0771933	0.271256	36	0.501	0.836905		-0.0379441	0.000245316	0.00303195	781	0.098	0.952057
intraciliary.transport.particle.B	0.0906232	0.195785	0.457956	17	0.593	0.881314		-0.0380118	0.0215555	0.0883461	305	0.093	0.952057
intrinsic.apoptotic.signaling.pathway	-0.0805005	0.172219	0.426431	24	0.19	0.616226		-0.0432537	0.0028556	0.0198056	397	0.453	0.9907
intrinsic.apoptotic.signaling.pathway.by.p53.class.mediator	-0.0384549	0.514331	0.766672	24	0.492	0.832275		0.041016	2.03714e-08	1.25437e-06	1569	0.137	0.952057
intrinsic.apoptotic.signaling.pathway.in.response.to.DNA.damage	-0.0599783	0.168721	0.42269	44	0.342	0.731575		-0.0197998	0.0355606	0.126577	943	0.523	0.991234
intrinsic.apoptotic.signaling.pathway.in.response.to.DNA.damage.by.p53.class.mediator	-0.187428	0.000597804	0.0102217	28	0.003	0.156985		0.00246336	0.841996	0.915201	547	0.95	0.995934
intrinsic.apoptotic.signaling.pathway.in.response.to.endoplasmic.reticulum.stress	0.0347137	0.510518	0.763675	30	0.482	0.825949		-0.0838529	4.72205e-17	2.05147e-14	838	0.017	0.815583
intrinsic.apoptotic.signaling.pathway.in.response.to.oxidative.stress	-0.0394352	0.609416	0.822841	14	0.587	0.876127		-0.0599365	0.000333411	0.00382298	299	0.197	0.971127
intrinsic.component.of.membrane	0.0875974	0.337426	0.615602	10	NA	NA		-0.0794609	0.000612969	0.00617709	155	0.025	0.857677
intrinsic.component.of.plasma.membrane	-0.0100469	0.834771	0.933904	36	0.884	0.973399		-0.0157712	0.0383618	0.132974	1446	0.393	0.985042
inward.rectifier.potassium.channel.activity	0.0291756	0.668253	0.854503	18	0.771	0.94102		-0.0347322	0.0354425	0.126355	306	0.382	0.98313
ion.channel.activity	0.134843	0.022217	0.128354	24	0.226	0.639513		0.00364725	0.798982	0.888925	407	0.943	0.995934
ion.channel.binding	0.0120511	0.664002	0.854503	109	0.762	0.940032		-0.0226472	1.66884e-06	5.56519e-05	3790	0.047	0.887495
ion.transmembrane.transport	0.0706738	0.000138323	0.0034699	246	0.099	0.524311		0.00744943	0.0557922	0.171432	5631	0.678	0.993993
ion.transport	0.0972334	0.00127455	0.0186202	92	0.075	0.490578		0.000164947	0.980461	0.991107	1852	0.995	0.999685
ionotropic.glutamate.receptor.binding	0.133464	0.0101206	0.0776485	31	0.142	0.561276		-0.0315633	0.00042377	0.00458103	1044	0.418	0.985754
ionotropic.glutamate.receptor.signaling.pathway	0.108919	0.0705774	0.255324	23	0.331	0.724398		0.021219	0.0025543	0.0182333	1697	0.305	0.978302
IRE1.mediated.unfolded.protein.response	0.0555644	0.174163	0.428907	50	0.202	0.627064		-0.0153709	0.0655885	0.190635	1202	0.7	0.99426
iron.ion.binding	0.0811278	0.00225354	0.0279894	119	0.241	0.65449		-0.0185374	0.00486645	0.0294317	1939	0.287	0.978302
iron.ion.homeostasis	-0.0911965	0.107499	0.325311	26	0.183	0.610024		-0.0489897	0.00070683	0.00687916	399	0.078	0.924182
iron.ion.transport	-0.027718	0.710118	0.877124	15	0.772	0.94102		-0.0452419	0.0340687	0.123142	183	0.215	0.97695
iron.sulfur.cluster.assembly	0.027437	0.703958	0.87433	16	0.708	0.921614		-0.0188395	0.247073	0.445601	315	0.53	0.991234
isomerase.activity	0.129953	0.0813932	0.278843	15	0.264	0.669742		-0.0189185	0.288146	0.490541	263	0.378	0.980897
isotype.switching	-0.152862	0.0291011	0.149143	17	0.099	0.524311		-0.043159	0.0137291	0.0638487	272	0.142	0.952057
JAK.STAT.cascade	-0.132161	0.0122368	0.0868879	30	0.029	0.379381		-0.069673	1.43836e-07	6.90062e-06	476	0.027	0.857677
JAK.STAT.cascade.involved.in.growth.hormone.signaling.pathway	-0.0999405	0.195393	0.457938	14	0.419	0.782223		-0.0398557	0.0211819	0.0873375	279	0.182	0.966137
JNK.cascade	-0.0891271	0.0431878	0.191057	43	0.148	0.568956		-0.0610033	1.07874e-10	1.29781e-08	937	0.02	0.833604
juxtaparanode.region.of.axon	0.138702	0.128787	0.365647	10	NA	NA		0.0116652	0.245483	0.444162	829	0.735	0.99426
K63.linked.polyubiquitin.modification.dependent.protein.binding	-0.12733	0.0614437	0.234285	18	0.032	0.389556		-0.0133967	0.415701	0.610924	308	0.713	0.99426
keratan.sulfate.biosynthetic.process	-0.00850482	0.878432	0.952634	27	0.917	0.983783		-0.00180353	0.899544	0.947589	409	0.968	0.997925
keratan.sulfate.catabolic.process	-0.0648741	0.436461	0.705778	12	0.526	0.848668		-0.00392834	0.870771	0.93331	143	0.92	0.995934
keratin.filament	0.352092	1.62596e-29	4.76907e-27	86	0	0		0.128318	1.11332e-09	1.00071e-07	188	0.009	0.786369
keratinization	0.342532	5.91809e-55	5.64142e-52	175	0	0		0.0596949	1.1402e-06	4.0437e-05	555	0.037	0.868455
keratinocyte.differentiation	0.157076	2.58288e-06	0.000131313	75	0.029	0.379381		0.0147929	0.0933901	0.241345	1077	0.662	0.993993
keratinocyte.proliferation	0.163692	0.0730435	0.260538	10	NA	NA		0.0016843	0.895083	0.945506	512	0.968	0.997925
kidney.development	0.000509341	0.986682	0.998465	90	0.978	0.999241		0.00109634	0.823584	0.903792	3499	0.935	0.995934
killing.of.cells.of.other.organism	0.032361	0.539591	0.781881	30	0.729	0.927049		0.01526	0.380115	0.578701	276	0.757	0.99426
kinase.activity	0.0133173	0.696105	0.869675	72	0.713	0.921614		-0.0202788	0.00285838	0.0198073	1817	0.355	0.980215
kinase.binding	-0.000203263	0.994864	0.999237	84	0.999	1		-0.0231047	0.000253446	0.00311138	2109	0.464	0.991234
kinesin.binding	0.0566345	0.221061	0.487792	39	0.223	0.637195		-0.0391607	2.70985e-05	0.000545457	961	0.125	0.952057
kinesin.complex	-0.0164615	0.687242	0.866343	50	0.766	0.94102		0.00568986	0.466351	0.655633	1374	0.77	0.99426
kinetochore	-0.179674	2.4803e-07	1.78441e-05	69	0.002	0.13749		-0.0118545	0.0995544	0.251255	1620	0.539	0.991234
kinetochore.assembly	-0.287709	0.00162908	0.0220273	10	0.091	0.509658		0.0272965	0.209852	0.402859	176	0.324	0.980206
L.alpha.amino.acid.transmembrane.transport	0.0732785	0.360264	0.637738	13	0.509	0.840977		0.00962816	0.565682	0.733543	297	0.832	0.994939
L.amino.acid.transmembrane.transporter.activity	0.117799	0.126971	0.36157	14	0.244	0.655202		0.0296314	0.0608528	0.18157	334	0.532	0.991234
L.ascorbic.acid.binding	-0.0349729	0.617609	0.828606	17	0.665	0.910316		-0.0269742	0.0824223	0.22318	346	0.148	0.955333
L.glutamate.transmembrane.transport	0.0979819	0.204293	0.467008	14	0.279	0.685957		-0.0423065	0.00295814	0.0202032	412	0.137	0.952057
L.glutamate.transmembrane.transporter.activity	0.100313	0.228866	0.498952	12	0.261	0.665987		-0.0441239	0.00276493	0.0193138	384	0.127	0.952057
L.phenylalanine.catabolic.process	0.204505	0.0251239	0.13788	10	NA	NA		0.00870845	0.730953	0.847262	130	0.862	0.994939
L.type.voltage.gated.calcium.channel.complex	0.155181	0.089252	0.293377	10	NA	NA		0.0118863	0.405419	0.601075	409	0.754	0.99426
labyrinthine.layer.blood.vessel.development	0.0299323	0.66917	0.854503	17	0.711	0.921614		-0.0144441	0.303316	0.505717	424	0.647	0.993185
lactation	0.0246639	0.594091	0.813674	39	0.705	0.921614		-0.0153244	0.0466631	0.151917	1413	0.306	0.97849
lamellipodium	0.0232652	0.313375	0.592387	158	0.414	0.781208		-0.00823909	0.0382951	0.132802	5395	0.63	0.991544
lamellipodium.assembly	0.00480682	0.92503	0.973541	32	0.931	0.987023		-0.020669	0.014656	0.0666144	1168	0.405	0.985625
lamellipodium.membrane	0.00949648	0.88025	0.953649	21	0.89	0.97755		-0.0223686	0.0707918	0.201219	545	0.484	0.991234
lamin.binding	0.0669888	0.353538	0.632957	16	0.407	0.77425		-0.023773	0.194015	0.384296	249	0.564	0.991234
laminin.binding	-0.0544732	0.376442	0.652234	22	0.594	0.881314		-0.0126732	0.376801	0.575336	406	0.662	0.993993
late.endosome	0.0635204	0.0214443	0.124836	110	0.061	0.464926		-0.0101214	0.0709425	0.201478	2684	0.543	0.991234
late.endosome.membrane	0.108644	0.000120976	0.00313798	105	0.011	0.279464		-0.0177018	0.00403643	0.0257989	2220	0.374	0.980897
lateral.element	-0.183715	0.0348619	0.165953	11	0.039	0.406946		-0.0247531	0.248847	0.44761	181	0.34	0.980215
lateral.plasma.membrane	0.0537852	0.175672	0.430488	53	0.203	0.627064		-0.0234789	0.0040748	0.0259197	1254	0.415	0.985625
lateral.ventricle.development	0.0363897	0.690264	0.867208	10	0.715	0.921614		-0.0176076	0.138632	0.309656	591	0.498	0.991234
layer.formation.in.cerebral.cortex	-0.0516756	0.571468	0.799972	10	NA	NA		-0.0230581	0.0538762	0.167457	584	0.35	0.980215
learning	0.000491343	0.989765	0.999237	57	0.994	1		0.0130027	0.0121035	0.0577544	3146	0.38	0.981374
learning.or.memory	0.0106984	0.787649	0.911207	53	0.852	0.964404		-0.0317342	2.44029e-06	7.74162e-05	1853	0.04	0.879887
left.right.axis.specification	-0.109824	0.170338	0.424001	13	0.203	0.627064		0.0181225	0.270115	0.471749	309	0.465	0.991234
lens.development.in.camera.type.eye	0.138304	0.00280471	0.0328047	39	0.143	0.562691		-0.00835891	0.284041	0.486429	1377	0.793	0.99426
lens.fiber.cell.differentiation	-0.0754877	0.365202	0.640075	12	0.519	0.845546		0.0237914	0.068675	0.196465	489	0.581	0.991234
lens.morphogenesis.in.camera.type.eye	0.0349013	0.702315	0.874282	10	NA	NA		0.00188946	0.889073	0.943274	455	0.963	0.996778
leukocyte.cell.cell.adhesion	-0.0578713	0.307075	0.586319	26	0.451	0.800205		-0.0397243	0.00376983	0.0244243	444	0.281	0.978302
leukocyte.chemotaxis	-0.131942	0.0321687	0.157863	22	0.072	0.488263		-0.0197548	0.340716	0.543478	194	0.717	0.99426
leukocyte.migration	-0.0562761	0.0299115	0.151063	125	0.377	0.755724		-0.0112338	0.0441757	0.146348	2706	0.523	0.991234
leukocyte.tethering.or.rolling	-0.120371	0.0770492	0.271023	18	0.202	0.627064		-0.0290177	0.102612	0.256324	264	0.244	0.978302
leukotriene.biosynthetic.process	0.237256	0.00937279	0.0741461	10	0.033	0.394715		-0.0803491	0.000130808	0.00186835	189	0.02	0.833604
leukotriene.metabolic.process	0.142341	0.0562899	0.222649	15	0.232	0.646062		-0.0327145	0.232605	0.430729	111	0.249	0.978302
Leydig.cell.differentiation	-0.0818786	0.347027	0.626224	11	0.241	0.65449		-0.0410946	0.00502669	0.0300411	389	0.222	0.97695
ligand.gated.ion.channel.activity	0.177613	0.0265921	0.142348	13	0.095	0.517994		0.00455787	0.813693	0.897544	223	0.928	0.995934
ligase.activity	-0.0521043	0.568281	0.799524	10	NA	NA		-0.0193923	0.160626	0.340544	437	0.584	0.991234
limb.bud.formation	0.0280468	0.747365	0.894445	11	NA	NA		0.0113468	0.301869	0.504567	692	0.71	0.99426
limb.development	0.0963409	0.0776626	0.271861	28	0.11	0.530481		-0.0134505	0.0988006	0.250443	1262	0.532	0.991234
limb.morphogenesis	0.000782279	0.992832	0.999237	11	0.992	1		-0.0244271	0.0152616	0.0686389	825	0.604	0.991234
linoleic.acid.metabolic.process	0.19191	0.00786497	0.0680025	16	0.131	0.55118		-0.0134689	0.477512	0.665386	232	0.776	0.99426
lipase.activity	0.0972509	0.132157	0.369168	20	0.245	0.655202		-0.0205721	0.303114	0.505621	209	0.527	0.991234
lipid.binding	0.0783934	0.00148944	0.0205769	138	0.04	0.407674		-0.000897835	0.867372	0.931217	2920	0.966	0.99777
lipid.biosynthetic.process	0.21516	0.0134697	0.0921077	11	0.104	0.527676		-0.00368617	0.858178	0.925777	196	0.887	0.994939
lipid.catabolic.process	0.0704854	0.0293639	0.149428	80	0.131	0.55118		-0.0306308	0.000116129	0.00172648	1327	0.093	0.952057
lipid.droplet	0.0882199	0.00918114	0.0735455	73	0.095	0.517994		-0.00901942	0.243318	0.44209	1403	0.682	0.994068
lipid.droplet.organization	0.12824	0.0596125	0.23053	18	0.042	0.412471		0.0221336	0.231293	0.429113	244	0.427	0.989697
lipid.glycosylation	0.11794	0.175564	0.430488	11	NA	NA		-0.0105245	0.539201	0.715195	284	0.745	0.99426
lipid.homeostasis	0.065879	0.183754	0.443452	34	0.25	0.658846		0.00754221	0.332691	0.535152	1383	0.703	0.99426
lipid.metabolic.process	0.0893069	0.000772211	0.0126916	119	0.041	0.41188		-0.00931579	0.108475	0.266251	2501	0.713	0.99426
lipid.phosphorylation	-0.161686	0.0361939	0.170137	14	0.076	0.492525		-0.0468725	7.22426e-05	0.00119311	599	0.065	0.902063
lipid.storage	0.194595	0.00202154	0.0263076	21	0.001	0.08765		-0.0240544	0.0574574	0.174866	521	0.414	0.985625
lipid.transport	0.0932677	0.014042	0.0945976	58	0.065	0.471822		-0.0147364	0.147471	0.32258	808	0.581	0.991234
lipid.transporter.activity	0.0921159	0.104	0.318259	26	0.282	0.688025		-0.0283906	0.0720579	0.203905	335	0.38	0.981374
lipopolysaccharide.binding	-0.0226529	0.657432	0.852648	32	0.768	0.94102		-0.0255381	0.0530926	0.165841	479	0.236	0.978302
lipopolysaccharide.mediated.signaling.pathway	-0.135535	0.00705255	0.0632467	33	0.105	0.529683		-0.0367216	0.00320768	0.0214853	538	0.089	0.952057
lipoprotein.metabolic.process	0.110738	0.0864445	0.288501	20	0.299	0.697932		-0.0136306	0.440649	0.634249	267	0.798	0.99426
lipoprotein.transport	0.0430995	0.620603	0.829867	11	0.619	0.892877		0.0322429	0.0202337	0.084478	433	0.488	0.991234
lipoxygenase.pathway	0.165869	0.0261285	0.141101	15	0.178	0.602964		-0.0576902	0.0144137	0.0659345	150	0.234	0.978302
liver.development	0.016054	0.642439	0.842373	70	0.65	0.904325		-0.0301121	1.14648e-07	5.62097e-06	2613	0.154	0.955333
liver.regeneration	-0.0199696	0.714568	0.878899	28	0.721	0.925266		-0.0262284	0.0104498	0.0519003	797	0.496	0.991234
locomotor.rhythm	0.0787193	0.365949	0.640075	11	NA	NA		-0.0340726	0.0138078	0.0640622	436	0.304	0.978302
locomotory.behavior	0.07023	0.029956	0.151088	80	0.192	0.618706		-0.0157424	0.00165928	0.0132269	3376	0.278	0.978302
locomotory.exploration.behavior	0.110049	0.169463	0.423158	13	0.112	0.533722		-0.0276684	0.0150665	0.0679274	645	0.337	0.980215
long.chain.fatty.acid.biosynthetic.process	0.134943	0.0250764	0.13788	23	0.235	0.650798		-0.0552626	0.00533543	0.0314493	212	0.074	0.914186
long.chain.fatty.acid.CoA.ligase.activity	0.126987	0.112876	0.335983	13	0.384	0.759765		-0.0236007	0.313641	0.516244	152	0.543	0.991234
long.chain.fatty.acid.metabolic.process	0.159209	0.00973664	0.0763906	22	0.304	0.702587		-0.0472266	0.00777602	0.0413804	265	0.116	0.952057
long.chain.fatty.acid.transport	0.177911	0.0211693	0.123802	14	0.109	0.530481		-0.00230506	0.920331	0.959982	157	0.965	0.997396
long.chain.fatty.acid.transporter.activity	0.297472	0.00063442	0.0107513	11	0.024	0.35806		-0.0307628	0.291554	0.494085	98	0.65	0.993185
long.chain.fatty.acyl.CoA.biosynthetic.process	0.119633	0.0876774	0.290597	17	0.271	0.674805		0.0163021	0.318852	0.521353	312	0.589	0.991234
long.term.memory	-0.0130534	0.798307	0.914743	32	0.904	0.980639		-0.0172347	0.0566196	0.173023	1024	0.414	0.985625
long.term.synaptic.depression	0.0454017	0.529492	0.774922	16	0.609	0.890018		0.0108177	0.466042	0.655299	379	0.695	0.99426
long.term.synaptic.potentiation	0.108739	0.011624	0.084286	45	0.093	0.514287		-0.00443281	0.496179	0.680186	1981	0.647	0.993185
low.density.lipoprotein.particle	-0.122227	0.142608	0.382523	12	0.24	0.65449		-0.016848	0.385825	0.58387	221	0.732	0.99426
low.density.lipoprotein.particle.binding	0.000519103	0.994264	0.999237	16	0.997	1		-0.0223916	0.0476107	0.154041	654	0.489	0.991234
low.density.lipoprotein.particle.clearance	0.0180909	0.768958	0.904109	22	0.828	0.957337		-0.0331853	0.0261269	0.101598	375	0.335	0.980215
low.density.lipoprotein.particle.receptor.activity	0.0895711	0.282629	0.560001	12	0.22	0.635878		-0.0194589	0.168543	0.351608	418	0.59	0.991234
low.density.lipoprotein.particle.receptor.binding	0.084124	0.204271	0.467008	19	0.345	0.732092		0.0148203	0.214139	0.407835	587	0.631	0.991544
low.density.lipoprotein.particle.remodeling	0.06867	0.391265	0.663063	13	0.533	0.851731		0.0103152	0.615252	0.767287	198	0.746	0.99426
lung.alveolus.development	-0.0313957	0.526412	0.774088	34	0.626	0.892877		-0.0158582	0.0388414	0.13419	1423	0.328	0.980206
lung.development	0.00126738	0.96974	0.993013	75	0.96	0.995952		-0.012583	0.0170028	0.0745509	3038	0.633	0.991698
lung.morphogenesis	0.0880435	0.311932	0.590858	11	NA	NA		-0.033335	0.0225223	0.0911489	391	0.327	0.980206
lyase.activity	0.0264786	0.750775	0.895017	12	0.824	0.955655		-0.0553883	0.0102864	0.0513661	179	0.214	0.97695
lymph.node.development	-0.137982	0.0488727	0.204557	17	0.167	0.593214		-0.0527886	6.05897e-05	0.0010402	482	0.093	0.952057
lymphangiogenesis	0.029566	0.72285	0.882781	12	0.779	0.943737		-0.0330305	0.0147577	0.0669014	455	0.458	0.99075
lymphocyte.chemotaxis	-0.0936898	0.0861878	0.288275	28	0.24	0.65449		0.0274197	0.330513	0.532362	105	0.547	0.991234
Lys48.specific.deubiquitinase.activity	-0.00824275	0.924579	0.973541	11	0.94	0.989385		-0.0577261	0.023173	0.0930252	129	0.167	0.955333
Lys63.specific.deubiquitinase.activity	-0.0564119	0.517057	0.768897	11	0.594	0.881314		-0.0169395	0.377926	0.576435	226	0.516	0.991234
lysine.acetylated.histone.binding	-0.0572001	0.400805	0.671767	18	0.475	0.820883		-0.0604046	3.79612e-06	0.000109339	489	0.047	0.887495
lysine.catabolic.process	0.22553	0.0135213	0.0921373	10	0.028	0.379027		-0.0396223	0.00134444	0.0111965	547	0.302	0.978302
lysophospholipase.activity	0.0101358	0.881649	0.954223	18	0.86	0.966901		-0.0024289	0.880442	0.938443	320	0.935	0.995934
lysosomal.lumen	-0.0498429	0.10428	0.318349	89	0.573	0.872314		0.00602695	0.32674	0.52868	2228	0.696	0.99426
lysosomal.membrane	0.0536751	0.00253528	0.0304954	268	0.051	0.440409		-0.00642318	0.134024	0.303721	4628	0.772	0.99426
lysosomal.transport	0.0694017	0.30801	0.586435	18	0.357	0.744895		-0.0178909	0.234852	0.433197	368	0.616	0.991234
lysosome	0.0236154	0.222959	0.489713	225	0.558	0.869102		-0.00998321	0.0251859	0.0989874	4269	0.635	0.992346
lysosome.localization	0.0297422	0.621478	0.829867	23	0.691	0.918017		-0.0144295	0.268547	0.469912	491	0.688	0.994068
lysosome.organization	0.0249549	0.594544	0.81371	38	0.639	0.900779		-0.00358981	0.739365	0.854037	718	0.901	0.995797
M.band	0.256923	5.775e-06	0.000268537	26	0	0		-0.0411252	0.000260306	0.00315841	659	0.13	0.952057
macroautophagy	0.0932328	0.00496926	0.0499941	76	0.019	0.334744		-0.0264573	0.00011726	0.00173177	1780	0.183	0.966137
macrophage.activation	-0.194886	0.0252039	0.13788	11	0.044	0.415806		0.0032656	0.772333	0.874938	656	0.967	0.997925
macrophage.chemotaxis	-0.0480781	0.564135	0.798162	12	0.564	0.872247		-0.0103022	0.676246	0.811205	137	0.793	0.99426
macrophage.differentiation	-0.170765	0.00996803	0.0773744	19	0.037	0.402863		-0.0260563	0.030211	0.113092	578	0.521	0.991234
magnesium.dependent.protein.serine.threonine.phosphatase.activity	-0.0946528	0.176638	0.431469	17	0.259	0.663297		-0.00679708	0.670488	0.806648	327	0.806	0.99426
magnesium.ion.binding	0.0173587	0.405068	0.676829	194	0.433	0.790676		-0.0334099	2.31608e-15	6.83462e-13	4786	0.078	0.924182
magnesium.ion.transmembrane.transport	0.000773134	0.991728	0.999237	15	0.993	1		-0.0187398	0.268427	0.469755	291	0.399	0.985042
magnesium.ion.transmembrane.transporter.activity	-0.0176608	0.806774	0.918903	16	0.81	0.950978		-0.0124588	0.45354	0.64528	302	0.565	0.991234
magnesium.ion.transport	-0.0779869	0.330233	0.608298	13	0.447	0.797548		-0.0339033	0.0701555	0.199933	238	0.231	0.978302
maintenance.of.gastrointestinal.epithelium	0.110184	0.168941	0.422963	13	0.307	0.706725		-0.0608911	0.0111117	0.0543766	145	0.124	0.952057
maintenance.of.protein.location.in.nucleus	-0.244157	0.00340342	0.0379502	12	0.003	0.156985		-0.0313728	0.0639191	0.18749	291	0.478	0.991234
male.genitalia.development	-0.0706323	0.286478	0.563934	19	0.351	0.735568		-0.0268863	0.00842281	0.0438688	803	0.482	0.991234
male.germ.cell.nucleus	-0.123734	0.0970637	0.30714	15	0.331	0.724398		-0.0252635	0.0903901	0.236362	375	0.225	0.978302
male.gonad.development	-0.106525	0.000516995	0.00904267	89	0	0		-0.016882	0.00170759	0.0135389	2914	0.332	0.980206
male.meiosis.I	0.0132183	0.830061	0.932535	22	0.897	0.978799		-0.0328021	0.0596723	0.1792	275	0.202	0.972086
male.meiotic.nuclear.division	-0.0597327	0.321376	0.600689	23	0.503	0.837055		-0.0642062	4.28383e-06	0.000121596	428	0.008	0.749222
male.sex.determination	-0.183108	0.0354665	0.167992	11	0.026	0.37359		-0.0291323	0.0442673	0.146585	398	0.434	0.989697
mammary.gland.alveolus.development	-0.0509825	0.494182	0.754028	15	0.442	0.795101		-0.0106661	0.283404	0.485746	846	0.526	0.991234
mammary.gland.development	-0.010918	0.859294	0.942061	22	0.884	0.973399		-0.0219171	0.00675365	0.0373241	1280	0.492	0.991234
mammary.gland.epithelial.cell.differentiation	-0.0530861	0.507481	0.762553	13	0.519	0.845546		0.0200285	0.0389543	0.134351	889	0.56	0.991234
manganese.ion.binding	0.0228597	0.54717	0.787305	58	0.47	0.819811		-0.000809417	0.924306	0.962178	1154	0.975	0.999685
mannose.binding	-0.0362862	0.555746	0.793461	22	0.645	0.903103		-0.0411842	0.0378667	0.131813	212	0.246	0.978302
mannosylation	-0.000450154	0.995875	0.999237	11	0.998	1		-0.0333698	0.115053	0.275436	186	0.313	0.979216
mannosyltransferase.activity	-0.000167664	0.997929	0.999433	20	0.996	1		-0.0154081	0.238377	0.436918	489	0.493	0.991234
MAP.kinase.activity	0.199571	0.0127173	0.0888142	13	0.08	0.494134		-0.00863103	0.682765	0.81596	187	0.778	0.99426
MAP.kinase.kinase.activity	-0.0321897	0.665987	0.854503	15	0.729	0.927049		-0.0168815	0.177893	0.364264	532	0.569	0.991234
MAP.kinase.kinase.kinase.activity	-0.031407	0.653909	0.850221	17	0.678	0.912097		-0.0522967	7.47073e-05	0.00122992	479	0.021	0.833604
MAP.kinase.tyrosine.serine.threonine.phosphatase.activity	0.0378181	0.636821	0.83762	13	0.629	0.894272		-0.0199896	0.244351	0.443141	283	0.49	0.991234
MAPK.cascade	-0.0268379	0.149457	0.391836	244	0.422	0.784066		-0.0291297	3.66164e-19	2.29072e-16	8149	0.016	0.815583
mast.cell.degranulation	-0.0590488	0.460996	0.728163	13	0.467	0.816609		0.025818	0.126036	0.291468	293	0.53	0.991234
mast.cell.granule	-0.0437218	0.487933	0.749152	21	0.526	0.848668		0.019654	0.180821	0.367659	387	0.546	0.991234
maternal.behavior	0.0362768	0.663453	0.854503	12	0.666	0.910316		-0.0294379	0.0444757	0.14703	389	0.08	0.93234
maternal.placenta.development	-0.0337176	0.698574	0.871618	11	NA	NA		-0.0351082	0.0127685	0.0602594	420	0.314	0.979216
maternal.process.involved.in.female.pregnancy	-0.0382208	0.525747	0.774088	23	0.595	0.881314		-0.0494895	1.53049e-05	0.000338091	638	0.104	0.952057
maturation.of.LSU.rRNA.from.tricistronic.rRNA.transcript..SSU.rRNA..5.8S.rRNA..LSU.rRNA.	0.00121252	0.987922	0.998729	13	0.985	1		0.0110889	0.564674	0.733002	225	0.703	0.99426
maturation.of.SSU.rRNA.from.tricistronic.rRNA.transcript..SSU.rRNA..5.8S.rRNA..LSU.rRNA.	0.03605	0.558322	0.794655	22	0.687	0.916872		0.01665	0.144151	0.317238	643	0.527	0.991234
mechanosensitive.ion.channel.activity	0.211292	0.0152375	0.0998292	11	0.12	0.542119		-0.0435751	0.0928728	0.240485	124	0.237	0.978302
mediator.complex	-0.0970458	0.0439249	0.192344	36	0.169	0.598927		-0.0350021	0.00026589	0.00319149	908	0.17	0.962029
megakaryocyte.development	-0.0950355	0.188115	0.447743	16	0.218	0.635878		-0.0316136	0.00128029	0.0108178	868	0.261	0.978302
meiotic.cell.cycle	-0.167282	7.45117e-06	0.000324253	60	0.003	0.156985		-0.00198053	0.830044	0.906937	983	0.927	0.995934
meiotic.nuclear.membrane.microtubule.tethering.complex	-0.0278738	0.74887	0.895017	11	0.784	0.946523		-0.0346399	0.110527	0.268632	177	0.478	0.991234
melanin.biosynthetic.process	0.0103343	0.901345	0.964588	12	0.91	0.982498		-0.00899276	0.664498	0.802082	194	0.796	0.99426
melanocyte.differentiation	-0.0173977	0.787657	0.911207	20	0.728	0.927049		-0.0224587	0.0150858	0.0679948	980	0.254	0.978302
melanosome	0.050335	0.0935927	0.300901	93	0.232	0.646062		-0.0124274	0.0551943	0.170251	2001	0.551	0.991234
melanosome.membrane	0.0471553	0.541249	0.782625	14	0.689	0.917383		0.0255408	0.255922	0.455436	165	0.464	0.991234
melanosome.organization	0.127251	0.0616047	0.234517	18	0.136	0.553793		0.0143667	0.335566	0.538007	375	0.633	0.991698
melanosome.transport	0.155208	0.031593	0.156135	16	0.056	0.455536		-0.0359922	0.0189076	0.0806202	355	0.09	0.952057
membrane	0.0172553	0.0162111	0.104414	1817	0.345	0.732092		-0.00798431	3.26928e-07	1.42323e-05	41604	0.614	0.991234
membrane.depolarization	0.191105	0.00191617	0.0252814	22	0.027	0.374158		-0.0211859	0.105692	0.261513	487	0.546	0.991234
membrane.depolarization.during.action.potential	0.0503228	0.485843	0.746683	16	0.681	0.913035		-0.0165453	0.241145	0.439938	419	0.675	0.993993
membrane.depolarization.during.cardiac.muscle.cell.action.potential	0.0159279	0.848479	0.938297	12	0.886	0.974683		-0.00893004	0.511627	0.692861	451	0.842	0.994939
membrane.fusion	0.122433	0.0183179	0.111933	31	0.121	0.542119		-0.0259832	0.0413177	0.139691	515	0.207	0.975145
membrane.organization	0.0262309	0.3274	0.605165	117	0.511	0.841901		-0.0117653	0.0342081	0.123492	2732	0.48	0.991234
membrane.protein.ectodomain.proteolysis	0.00551477	0.931959	0.975848	20	0.936	0.988141		-0.0656585	0.000260919	0.00316339	258	0.024	0.856986
membrane.protein.intracellular.domain.proteolysis	-0.159492	0.0228001	0.12968	17	0.109	0.530481		-0.0265594	0.0666692	0.192767	398	0.446	0.99065
membrane.protein.proteolysis	-0.199152	0.0291928	0.149413	10	NA	NA		0.0155897	0.552585	0.725392	121	0.678	0.993993
membrane.raft	-0.030654	0.130812	0.367822	205	0.565	0.872262		7.04704e-05	0.986134	0.993921	5185	0.994	0.999685
membrane.repolarization	-0.0461778	0.613078	0.825739	10	NA	NA		0.00997015	0.505668	0.688067	372	0.873	0.994939
membrane.repolarization.during.ventricular.cardiac.muscle.cell.action.potential	0.00649115	0.943331	0.980263	10	NA	NA		-0.0140662	0.368584	0.568631	341	0.81	0.99426
memory	0.0381064	0.250922	0.52302	76	0.52	0.845603		0.0120721	0.0294117	0.11098	2745	0.513	0.991234
mesoderm.development	-0.0934375	0.0991292	0.310839	26	0.258	0.662673		-0.00401249	0.670793	0.806891	939	0.862	0.994939
mesoderm.formation	-0.0868214	0.111819	0.334143	28	0.26	0.664402		-0.0498004	3.85366e-08	2.1547e-06	1020	0.184	0.966137
mesodermal.cell.differentiation	0.0334953	0.700466	0.87312	11	0.696	0.920341		-0.0584924	8.28771e-06	0.000202848	485	0.063	0.902063
mesonephros.development	0.0288345	0.740521	0.889837	11	0.773	0.94102		0.011133	0.272045	0.474073	814	0.758	0.99426
metal.ion.binding	-0.0398294	4.43231e-09	4.0239e-07	2066	0.03	0.381087		-0.0137559	3.74169e-20	2.78667e-17	46692	0.334	0.980206
metalloaminopeptidase.activity	-0.0204051	0.752068	0.895017	20	0.703	0.921614		0.00535757	0.641529	0.786351	631	0.759	0.99426
metallocarboxypeptidase.activity	0.0275818	0.607206	0.821488	29	0.572	0.872314		0.0103062	0.263289	0.464296	986	0.606	0.991234
metalloendopeptidase.activity	-0.00710222	0.80814	0.919283	98	0.848	0.963923		-0.01902	0.00195044	0.0149241	2232	0.375	0.980897
metalloendopeptidase.inhibitor.activity	-0.00404145	0.955365	0.986654	16	0.949	0.9926		0.0402542	0.00421069	0.0265117	422	0.156	0.955333
metalloexopeptidase.activity	-0.131492	0.11473	0.33861	12	0.074	0.489517		-0.0200007	0.326176	0.528313	201	0.632	0.991698
metallopeptidase.activity	-0.0317412	0.399202	0.670259	59	0.49	0.831932		-0.02613	0.000593121	0.00604326	1449	0.189	0.967898
metanephros.development	-0.071991	0.187349	0.447316	28	0.3	0.699335		-0.0428162	1.90107e-10	2.06478e-08	1859	0.021	0.833604
metaphase.plate.congression	-0.190969	0.0282874	0.146748	11	0.092	0.511987		0.0658643	0.00602262	0.0343272	145	0.067	0.902063
methyl.CpG.binding	-0.0555237	0.34642	0.625721	24	0.561	0.87068		-0.0351017	0.0104759	0.0519921	444	0.33	0.980206
methylated.histone.binding	-0.199454	4.00229e-07	2.67732e-05	54	0.014	0.293916		-0.00687273	0.444743	0.637535	1035	0.781	0.99426
methylation	0.0645279	0.0920526	0.297455	57	0.288	0.689234		-0.0161539	0.0564446	0.172713	1168	0.299	0.978302
methylation.dependent.chromatin.silencing	-0.0408589	0.624052	0.832288	12	NA	NA		-0.040208	0.137072	0.307627	114	0.341	0.980215
methyltransferase.activity	0.0092723	0.835313	0.933931	42	0.878	0.971369		-0.00347465	0.683762	0.816678	1151	0.873	0.994939
MHC.class.I.protein.binding	0.029816	0.689282	0.866831	15	0.805	0.950978		-0.0128346	0.588708	0.751318	148	0.806	0.99426
MHC.class.II.protein.complex	0.164695	0.0328652	0.159637	14	0.749	0.936851		0.111316	0.0928089	0.240359	19	0.146	0.954615
MHC.class.II.protein.complex.binding	-0.022649	0.769192	0.904109	14	0.802	0.950579		-0.000111301	0.996122	0.998117	159	0.999	1
microfibril	0.0320452	0.725648	0.884247	10	NA	NA		-0.0858745	1.22875e-10	1.45588e-08	469	0.016	0.815583
microfilament.motor.activity	0.259568	8.96488e-05	0.00253208	19	0.045	0.41628		0.0133365	0.391187	0.588118	345	0.694	0.99426
microglial.cell.activation	-0.1378	0.013201	0.0913531	27	0.097	0.522399		-0.0300927	0.0431355	0.144308	377	0.284	0.978302
microtubule	-0.0420095	0.0165138	0.105426	276	0.194	0.621154		-0.0196833	3.82347e-09	3.03549e-07	7725	0.206	0.975145
microtubule.anchoring	0.0235094	0.777942	0.907956	12	0.707	0.921614		0.0086627	0.561485	0.730665	375	0.826	0.994939
microtubule.anchoring.at.centrosome	-0.0498973	0.58478	0.808854	10	0.541	0.85439		-0.0438347	0.0630072	0.185511	150	0.166	0.955333
microtubule.associated.complex	-0.061829	0.275172	0.551647	26	0.367	0.753338		-0.0287474	0.00178745	0.014034	988	0.194	0.971127
microtubule.based.movement	-0.0279532	0.393569	0.664311	78	0.673	0.910316		-0.00866785	0.172917	0.357663	2079	0.61	0.991234
microtubule.based.process	0.0238793	0.66187	0.854503	28	0.768	0.94102		-0.0153999	0.208979	0.401972	556	0.618	0.991234
microtubule.binding	-0.0375178	0.057187	0.224335	217	0.24	0.65449		-0.016039	3.58098e-05	0.000686354	5673	0.296	0.978302
microtubule.bundle.formation	-0.122265	0.0278838	0.146045	27	0.07	0.484063		-0.00205855	0.816906	0.899409	1059	0.914	0.995797
microtubule.cytoskeleton	-0.0432171	0.106621	0.323683	117	0.2	0.627064		-0.0146717	0.00658911	0.0366739	2894	0.505	0.991234
microtubule.cytoskeleton.organization	-0.0463617	0.114782	0.33861	97	0.244	0.655202		-0.00264238	0.599527	0.757083	3339	0.884	0.994939
microtubule.depolymerization	-0.0184908	0.804165	0.91695	15	0.855	0.96542		0.0338328	0.00299994	0.0203819	643	0.12	0.952057
microtubule.motor.activity	-0.026698	0.460257	0.728163	64	0.66	0.908861		-0.000548092	0.93476	0.967506	1874	0.974	0.999302
microtubule.nucleation	-0.0776672	0.28209	0.559599	16	0.226	0.639513		-0.027672	0.180888	0.367749	195	0.342	0.980215
microtubule.organizing.center	-0.0578108	0.0183027	0.111933	140	0.08	0.494134		-0.0155742	0.0010676	0.00935471	3739	0.371	0.980796
microtubule.plus.end	-0.099354	0.156107	0.403331	17	0.252	0.658846		0.0239106	0.00766721	0.0409966	1041	0.416	0.985625
microtubule.plus.end.binding	-0.0882548	0.207725	0.47127	17	0.372	0.755201		-0.00476742	0.646673	0.789916	773	0.895	0.994939
microtubule.polymerization	-0.050538	0.561627	0.796386	11	NA	NA		-0.0246367	0.119648	0.282023	333	0.618	0.991234
microtubule.severing	-0.073246	0.40022	0.671377	11	0.45	0.799645		-0.036781	0.00573855	0.0331674	471	0.22	0.97695
microvillus	0.0656458	0.0838505	0.283992	58	0.176	0.602594		0.0196444	0.00679667	0.0375088	1593	0.393	0.985042
microvillus.membrane	-0.0633966	0.292588	0.569885	23	0.495	0.832759		0.00695224	0.688196	0.818944	278	0.783	0.99426
midbody	-0.044022	0.0821336	0.280372	131	0.212	0.633686		0.00451599	0.414055	0.609661	2759	0.812	0.99426
midbody.abscission	0.0779778	0.29571	0.574106	15	0.371	0.754919		-0.0289055	0.128234	0.295069	231	0.26	0.978302
midbrain.development	-0.107203	0.0584858	0.228256	26	0.156	0.576329		-0.043686	5.9985e-07	2.33956e-05	1093	0.032	0.857677
middle.ear.morphogenesis	0.010727	0.871404	0.949332	19	0.896	0.978799		-0.021651	0.0171707	0.075133	1014	0.419	0.98601
midgut.development	0.171146	0.0609044	0.232927	10	NA	NA		0.0242081	0.0106209	0.0525835	932	0.566	0.991234
miRNA.binding	-0.139845	0.0202548	0.120111	23	0.069	0.482862		-0.0587394	1.67875e-07	7.79098e-06	663	0.073	0.909737
miRNA.mediated.inhibition.of.translation	-0.0636062	0.465076	0.731912	11	NA	NA		-0.0332785	0.0607184	0.181401	265	0.37	0.980796
miRNA.metabolic.process	-0.0883231	0.28939	0.566635	12	0.449	0.798678		-0.0606799	0.00026172	0.00316819	302	0.112	0.952057
misfolded.protein.binding	0.0857603	0.130129	0.367097	26	0.287	0.689234		-0.0156786	0.297194	0.500821	369	0.554	0.991234
mismatch.repair	-0.0980763	0.077752	0.271861	27	0.178	0.602964		-0.00760234	0.47595	0.664118	735	0.801	0.99426
Mitochondria.associated.ER.Membrane	-0.0184366	0.824974	0.92977	12	0.829	0.957337		-0.0364248	0.0345276	0.124226	281	0.169	0.961849
mitochondrial.calcium.ion.homeostasis	0.0765092	0.358749	0.637738	12	0.384	0.759765		0.00631656	0.713938	0.835716	281	0.846	0.994939
mitochondrial.calcium.ion.transmembrane.transport	0.152884	0.0179349	0.110836	20	0.019	0.334744		0.027113	0.0605439	0.180949	400	0.44	0.989697
mitochondrial.electron.transport..cytochrome.c.to.oxygen	0.00722591	0.920286	0.971422	16	0.95	0.993053		-0.0379387	0.00784318	0.0416528	410	0.08	0.93234
mitochondrial.electron.transport..NADH.to.ubiquinone	0.0516768	0.26417	0.537375	39	0.64	0.900779		-0.0329106	0.00752007	0.0404712	551	0.145	0.952057
mitochondrial.electron.transport..ubiquinol.to.cytochrome.c	0.136559	0.116795	0.342832	11	0.26	0.664402		0.00651342	0.750974	0.861214	198	0.899	0.995797
mitochondrial.fission	0.0482616	0.54682	0.787099	13	0.518	0.845488		0.0105672	0.538271	0.71491	283	0.698	0.99426
mitochondrial.fusion	0.0743327	0.372585	0.647228	12	0.433	0.790676		0.0262872	0.10249	0.256264	322	0.502	0.991234
mitochondrial.genome.maintenance	-0.0472075	0.571212	0.799972	12	0.666	0.910316		0.0160517	0.352434	0.554143	280	0.727	0.99426
mitochondrial.inner.membrane	-0.00528276	0.737696	0.889607	342	0.916	0.983783		-0.0167457	4.38766e-06	0.000124092	6447	0.394	0.985042
mitochondrial.intermembrane.space	0.0440623	0.199373	0.461853	71	0.249	0.658846		-0.0397542	1.50103e-07	7.15736e-06	1464	0.14	0.952057
mitochondrial.large.ribosomal.subunit	-0.0699699	0.0839451	0.284013	51	0.329	0.724089		0.0137273	0.142727	0.315359	954	0.657	0.993993
mitochondrial.matrix	0.0829012	3.63379e-07	2.47422e-05	320	0.104	0.527676		-0.0136726	0.000233722	0.00292901	6202	0.536	0.991234
mitochondrial.membrane	0.00393553	0.898509	0.9639	88	0.907	0.981161		-0.00869562	0.207308	0.399938	1766	0.727	0.99426
mitochondrial.nucleoid	-0.053207	0.256437	0.528538	38	0.566	0.872262		-0.00252119	0.793486	0.885878	902	0.889	0.994939
mitochondrial.outer.membrane	0.047871	0.0532496	0.214682	137	0.187	0.611018		-0.0200891	0.000187954	0.00247233	2917	0.055	0.888636
mitochondrial.respiratory.chain	-0.0261263	0.753983	0.896661	12	0.776	0.943689		-0.02852	0.134246	0.303894	230	0.274	0.978302
mitochondrial.respiratory.chain.complex.I	0.0192719	0.677109	0.859607	39	0.868	0.968866		-0.0296025	0.0170998	0.0748715	542	0.212	0.97695
mitochondrial.respiratory.chain.complex.I.assembly	-0.0295214	0.46157	0.728464	52	0.788	0.947763		-0.0350894	0.000668921	0.00662147	786	0.071	0.902063
mitochondrial.respiratory.chain.complex.IV	0.0526267	0.564409	0.798252	10	NA	NA		-0.000407229	0.978961	0.990423	350	0.987	0.999685
mitochondrial.respiratory.chain.complex.IV.assembly	-0.0700074	0.290762	0.567679	19	0.42	0.782839		0.0247019	0.171201	0.3554	256	0.485	0.991234
mitochondrial.ribosome	-0.0736316	0.221566	0.488059	23	0.322	0.717694		0.00840684	0.591008	0.752972	341	0.825	0.994939
mitochondrial.small.ribosomal.subunit	-0.0356916	0.513327	0.766672	28	0.713	0.921614		-0.0181967	0.170387	0.354159	474	0.546	0.991234
mitochondrial.translation	-0.0229618	0.674099	0.858784	28	0.808	0.950978		0.00955415	0.460648	0.650875	498	0.805	0.99426
mitochondrial.translational.elongation	-0.0508674	0.105156	0.320512	85	0.527	0.849109		8.67992e-07	0.999906	0.999906	1557	1	1
mitochondrial.translational.termination	-0.0568029	0.0687617	0.250873	86	0.475	0.820883		-0.000249626	0.97264	0.986517	1584	0.992	0.999685
mitochondrial.transport	-0.117954	0.140854	0.380508	13	0.147	0.566977		-0.015775	0.290993	0.49372	374	0.566	0.991234
mitochondrion	0.0223211	0.0135318	0.0921373	1092	0.452	0.800764		-0.0119518	1.22028e-08	7.88644e-07	20812	0.47	0.991234
mitochondrion.morphogenesis	0.000715005	0.99095	0.999237	21	0.989	1		-0.0128741	0.337735	0.540281	463	0.629	0.991544
mitochondrion.organization	0.00949969	0.774712	0.905572	76	0.777	0.943737		-0.0271366	3.98741e-05	0.000743637	1926	0.159	0.955333
mitogen.activated.protein.kinase.binding	-0.0742929	0.238565	0.509316	21	0.146	0.565609		-0.0324954	0.010873	0.0535209	513	0.358	0.980215
mitogen.activated.protein.kinase.kinase.binding	0.14468	0.0708727	0.255665	13	0.096	0.519407		-0.000439362	0.976821	0.98941	365	0.993	0.999685
mitogen.activated.protein.kinase.kinase.kinase.binding	-0.00596266	0.932168	0.975848	17	0.947	0.991691		0.00942706	0.494245	0.678606	439	0.787	0.99426
mitotic.cell.cycle	-0.0945917	0.000368672	0.0068573	119	0.009	0.260777		-0.0153965	0.00358869	0.0234058	3021	0.446	0.99065
mitotic.cell.cycle.arrest	-0.120889	0.104994	0.320275	15	0.216	0.634783		-0.0343415	0.00238191	0.0173674	654	0.237	0.978302
mitotic.cell.cycle.checkpoint	-0.202147	0.000127166	0.00325424	30	0.002	0.13749		-0.0171962	0.162528	0.343789	551	0.552	0.991234
mitotic.cell.cycle.phase.transition	-0.145658	0.0180288	0.110855	22	0.07	0.484063		-0.0658205	2.72883e-05	0.000548573	339	0.019	0.833604
mitotic.chromosome.condensation	-0.120534	0.0950562	0.304284	16	0.207	0.629984		-0.0347357	0.0850577	0.227675	205	0.358	0.980215
mitotic.cytokinesis	-0.109781	0.00851708	0.070446	48	0.034	0.394715		-0.0285348	0.000809638	0.00758702	1154	0.129	0.952057
mitotic.DNA.replication.checkpoint	-0.145354	0.111443	0.333281	10	NA	NA		0.0682331	0.000599498	0.00609233	211	0.135	0.952057
mitotic.G2.DNA.damage.checkpoint	-0.201525	0.00903109	0.0726488	14	0.004	0.171024		-0.0467102	4.7291e-05	0.000848202	634	0.083	0.940415
mitotic.metaphase.plate.congression	-0.123777	0.0138701	0.0936046	33	0.102	0.527451		-0.0110245	0.303245	0.505678	729	0.575	0.991234
mitotic.nuclear.envelope.disassembly	-0.0381862	0.660975	0.854503	11	0.671	0.910316		-0.0511175	0.000437617	0.00469433	395	0.309	0.97849
mitotic.sister.chromatid.segregation	-0.18694	0.000493678	0.0087284	29	0.039	0.406946		-0.0250034	0.0304533	0.113782	626	0.448	0.99065
mitotic.spindle	-0.122313	0.000789174	0.0128595	63	0.009	0.260777		-0.00818788	0.251109	0.450384	1649	0.666	0.993993
mitotic.spindle.assembly	-0.0983553	0.0825841	0.281406	26	0.127	0.547678		-0.020441	0.0847877	0.227263	594	0.444	0.99065
mitotic.spindle.assembly.checkpoint	-0.255846	3.26536e-05	0.00111168	22	0.001	0.08765		0.000786339	0.955417	0.978119	422	0.984	0.999685
mitotic.spindle.midzone	-0.256774	0.00318759	0.0364994	11	0.022	0.345883		0.0185209	0.362054	0.562982	202	0.682	0.994068
mitotic.spindle.organization	-0.164804	0.000439592	0.00801993	38	0.001	0.08765		-0.0256736	0.0205724	0.0856178	680	0.334	0.980206
mitotic.spindle.pole	-0.143766	0.0225659	0.129584	21	0.057	0.457304		-0.00410932	0.749076	0.860046	506	0.89	0.994939
MKS.complex	-0.176248	0.0277784	0.145693	13	0.075	0.490578		-0.0630766	0.00440111	0.0274236	170	0.044	0.887495
MLL1.complex	-0.127573	0.0194698	0.117466	28	0.153	0.571874		-0.0646197	3.41852e-07	1.47288e-05	520	0.043	0.887495
MLL3.4.complex	-0.0461362	0.564617	0.798252	13	0.595	0.881314		-0.0913745	2.69678e-06	8.32257e-05	220	0.049	0.887495
modulation.of.chemical.synaptic.transmission	0.0815487	0.0348286	0.165953	56	0.267	0.672487		0.0118862	0.0110893	0.0542838	3870	0.395	0.985042
molecular.adaptor.activity	-0.0126921	0.781223	0.908172	40	0.868	0.968866		-0.00553695	0.482422	0.669249	1349	0.686	0.994068
molecular_function	-0.00065688	0.956223	0.986802	604	0.962	0.995952		-0.0086812	0.000724217	0.00699183	13415	0.544	0.991234
monocarboxylic.acid.transmembrane.transporter.activity	0.0202871	0.792681	0.912293	14	0.839	0.962005		-0.0564383	0.0134307	0.0627409	160	0.091	0.952057
monocarboxylic.acid.transport	0.00377461	0.962414	0.990093	13	0.959	0.995633		-0.0527246	0.0217331	0.088841	158	0.116	0.952057
monocyte.chemotaxis	-0.100966	0.0312784	0.15518	38	0.165	0.589094		0.022124	0.157306	0.335893	341	0.401	0.985467
monocyte.differentiation	-0.0247106	0.724279	0.883171	17	0.666	0.910316		-0.0400258	0.000335278	0.00384158	671	0.192	0.971127
monooxygenase.activity	0.173873	0.0014508	0.0201601	28	0.25	0.658846		-0.0039257	0.838797	0.912675	224	0.936	0.995934
monosaccharide.binding	0.022168	0.773959	0.905572	14	0.746	0.93644		-0.0298623	0.196496	0.387052	156	0.546	0.991234
morphogenesis.of.an.epithelium	0.0908147	0.208493	0.472642	16	0.287	0.689234		-0.00952607	0.459288	0.649834	504	0.705	0.99426
morphogenesis.of.embryonic.epithelium	0.0581909	0.52397	0.77318	10	NA	NA		0.0317838	0.0283881	0.108326	397	0.45	0.99065
motile.cilium	-0.0936782	0.0035756	0.039404	81	0.241	0.65449		-0.000978088	0.880762	0.938551	1977	0.973	0.999302
motile.cilium.assembly	-0.200747	0.00245054	0.0298528	19	0.032	0.389556		-0.00144167	0.918458	0.95854	421	0.977	0.999685
motor.activity	0.150158	0.00056963	0.00987272	44	0.012	0.28427		0.0127901	0.132268	0.300905	1160	0.516	0.991234
motor.neuron.axon.guidance	0.042895	0.476397	0.740271	23	0.601	0.887576		-0.0292481	3.8414e-05	0.000724722	1663	0.085	0.945519
mRNA.3..end.processing	-0.0863304	0.0385588	0.176712	48	0.34	0.730417		-0.0424706	1.09116e-06	3.87856e-05	1103	0.162	0.955333
mRNA.3..UTR.AU.rich.region.binding	0.0273946	0.649265	0.848115	23	0.679	0.912097		-0.0278794	0.00802374	0.0423411	756	0.258	0.978302
mRNA.3..UTR.binding	-0.0779624	0.0251803	0.13788	69	0.226	0.639513		-0.0232705	0.000302315	0.00353115	2027	0.155	0.955333
mRNA.5..UTR.binding	-0.0900368	0.17424	0.428907	19	0.292	0.692192		-0.0123737	0.339321	0.541915	498	0.701	0.99426
mRNA.binding	-0.0219827	0.390792	0.662557	128	0.659	0.908861		-0.0263718	6.12746e-09	4.51008e-07	4123	0.25	0.978302
mRNA.cap.binding.complex	-0.256808	0.00491949	0.0496244	10	NA	NA		8.64724e-05	0.996613	0.998273	201	0.997	0.999685
mRNA.catabolic.process	-0.130753	0.0429352	0.191007	20	0.084	0.494134		-0.0615425	1.07626e-05	0.000254656	427	0.005	0.747003
mRNA.cis.splicing..via.spliceosome	0.0473932	0.486344	0.747151	18	0.52	0.845603		-0.0224008	0.0821317	0.222624	503	0.448	0.99065
mRNA.cleavage.and.polyadenylation.specificity.factor.complex	-0.0822145	0.304691	0.584695	13	0.43	0.789722		-0.0198543	0.351043	0.55268	184	0.732	0.99426
mRNA.destabilization	-0.0430654	0.590812	0.812673	13	0.662	0.910316		-0.0346144	0.00452372	0.0278987	562	0.466	0.991234
mRNA.export.from.nucleus	-0.0331843	0.276794	0.553442	90	0.622	0.892877		-0.0489569	1.44615e-12	2.45845e-10	1756	0.115	0.952057
mRNA.methylation	-0.100974	0.246176	0.518029	11	0.337	0.728885		-0.0581509	0.00526959	0.0311711	192	0.032	0.857677
mRNA.polyadenylation	-0.0809122	0.170036	0.424001	24	0.328	0.724089		-0.0292918	0.0386669	0.133735	416	0.388	0.984478
mRNA.processing	-0.0802872	0.00203316	0.0263365	124	0.062	0.468443		-0.0271243	5.51214e-10	5.38811e-08	4445	0.175	0.962125
mRNA.splice.site.selection	0.0497906	0.504332	0.761327	15	0.624	0.892877		-0.0125348	0.23796	0.436506	741	0.658	0.993993
mRNA.splicing..via.spliceosome	-0.0680266	0.00176629	0.0235485	178	0.185	0.610024		-0.0273087	6.51748e-10	6.17778e-08	4346	0.307	0.97849
mRNA.stabilization	-0.0879347	0.196485	0.459068	18	0.231	0.645327		-0.0152751	0.286168	0.488326	407	0.674	0.993993
mRNA.transcription.by.RNA.polymerase.II	-0.0784338	0.236567	0.506759	19	0.342	0.731575		-0.0264121	0.0456865	0.149798	478	0.531	0.991234
mRNA.transport	0.0221065	0.637277	0.83762	38	0.65	0.904325		-0.0186824	0.0336867	0.122099	1082	0.471	0.991234
multicellular.organism.aging	-0.0777899	0.28133	0.558995	16	0.417	0.782223		-0.0237643	0.0813919	0.220936	449	0.356	0.980215
multicellular.organism.development	-0.0463249	0.00135067	0.0192887	409	0.199	0.627064		-0.00758707	0.00524759	0.0310711	11894	0.732	0.99426
multicellular.organism.growth	-0.0321184	0.323877	0.603589	79	0.394	0.765723		-0.0227365	3.53868e-05	0.000679079	2791	0.243	0.978302
multivesicular.body	0.148656	0.00647857	0.0600052	28	0.075	0.490578		-0.0137516	0.295143	0.498923	484	0.674	0.993993
multivesicular.body.assembly	0.233558	2.66339e-05	0.000958068	27	0.001	0.08765		-0.0109478	0.417986	0.613428	457	0.656	0.993993
multivesicular.body.membrane	0.0726103	0.426531	0.696279	10	NA	NA		-0.0746227	0.000753902	0.00721164	170	0.015	0.815583
muscle.alpha.actinin.binding	0.227319	0.000160799	0.00378473	23	0.004	0.171024		-0.00715129	0.531743	0.709761	639	0.83	0.994939
muscle.cell.cellular.homeostasis	0.0494204	0.467893	0.733104	18	0.525	0.848668		-0.0285752	0.00350942	0.0229943	873	0.307	0.97849
muscle.cell.differentiation	0.0836655	0.336605	0.614986	11	NA	NA		-0.0230701	0.0377233	0.131545	678	0.653	0.993185
muscle.contraction	0.176895	6.84907e-10	7.45355e-08	102	0.004	0.171024		-0.0204849	0.000420773	0.0045669	2497	0.4	0.985042
muscle.fiber.development	0.180971	0.00978378	0.0766028	17	0.018	0.323631		-0.0119718	0.18145	0.368507	1043	0.63	0.991544
muscle.filament.sliding	0.212619	1.34494e-05	0.000523034	35	0.034	0.394715		-0.0110878	0.189851	0.379072	1171	0.656	0.993993
muscle.myosin.complex	0.342049	4.49971e-06	0.000214468	15	0.036	0.401962		0.00951248	0.610638	0.764685	239	0.826	0.994939
muscle.organ.development	0.0100338	0.747842	0.894645	86	0.802	0.950579		-0.0200349	2.76451e-05	0.000553609	3708	0.16	0.955333
muscle.structure.development	0.102726	0.260616	0.53283	10	NA	NA		0.00616047	0.718813	0.839591	285	0.908	0.995797
MyD88.dependent.toll.like.receptor.signaling.pathway	-0.198736	0.000212222	0.00459935	29	0.038	0.403721		-0.0260043	0.0484303	0.155758	481	0.238	0.978302
MyD88.independent.toll.like.receptor.signaling.pathway	-0.206856	0.00980776	0.0766332	13	0.07	0.484063		-0.0211637	0.195635	0.386038	312	0.45	0.99065
myelin.sheath	0.0178999	0.752065	0.895017	26	0.784	0.946523		-0.0348228	0.00263985	0.0186567	623	0.278	0.978302
myelination	-0.0313056	0.443886	0.713249	50	0.607	0.890018		-0.0246278	0.00190519	0.0146423	1332	0.21	0.97695
myelination.in.peripheral.nervous.system	0.0181485	0.807719	0.919283	15	0.809	0.950978		-0.00672966	0.456895	0.647562	1023	0.825	0.994939
myeloid.cell.differentiation	-0.0471465	0.488616	0.749152	18	0.361	0.747146		-0.0133841	0.285451	0.487759	532	0.737	0.99426
myeloid.dendritic.cell.differentiation	-0.243801	0.000342184	0.00645915	18	0.001	0.08765		-0.0525559	0.000483567	0.00511358	368	0.054	0.888636
myoblast.differentiation	-0.07144	0.307817	0.586435	17	0.451	0.800205		-0.0343712	0.0047773	0.0290163	563	0.238	0.978302
myoblast.fusion	0.00761288	0.916032	0.971422	16	0.942	0.98941		0.0133083	0.243424	0.44223	642	0.566	0.991234
myofibril	0.205763	0.000215082	0.00459935	27	0.012	0.28427		-0.0121618	0.310482	0.512761	581	0.634	0.992346
myofibril.assembly	0.276441	0.000913197	0.0141545	12	0.006	0.23636		-0.0665101	0.000551782	0.00568877	225	0.012	0.812468
myosin.binding	0.179973	0.0066096	0.0605172	19	0.01	0.263609		0.00717926	0.41378	0.609618	1085	0.816	0.994939
myosin.complex	0.130125	0.0136387	0.0925345	30	0.116	0.533722		0.0383563	7.90161e-05	0.00128041	886	0.083	0.940415
myosin.filament	0.370726	6.64696e-07	4.1549e-05	15	0.016	0.309923		-0.0401524	0.0319772	0.1174	238	0.246	0.978302
myosin.II.binding	0.101528	0.266219	0.540231	10	0.398	0.767835		-0.00782854	0.709395	0.83289	189	0.85	0.994939
myosin.V.binding	0.149511	0.0859548	0.288001	11	NA	NA		-0.0571572	0.00054908	0.00567588	305	0.113	0.952057
N.acetylglucosamine.metabolic.process	-0.125928	0.130903	0.367822	12	0.242	0.655175		0.00790752	0.752144	0.861879	133	0.802	0.99426
N.glycan.processing	0.0297673	0.699753	0.872626	14	0.824	0.955655		0.0120937	0.373575	0.572867	452	0.644	0.993185
NA..24	-0.0197574	0.820492	0.927248	11	0.839	0.962005		-0.0391121	0.0426815	0.143184	224	0.467	0.991234
NA..5	0.0549609	0.461109	0.728163	15	0.557	0.868316		0.00933223	0.479239	0.666937	480	0.793	0.99426
NAD..ADP.ribosyltransferase.activity	-0.0287631	0.640485	0.840555	22	0.64	0.900779		-0.0112457	0.450384	0.642232	376	0.785	0.99426
NAD..binding	0.0715472	0.353959	0.632957	14	0.408	0.774471		-0.0630008	0.00734228	0.0399183	151	0.1	0.952057
NAD..kinase.activity	-0.170745	0.0180446	0.110855	16	0.033	0.394715		-0.0463193	3.2759e-05	0.000638842	672	0.061	0.902063
NAD.binding	0.129045	0.00474663	0.0486529	40	0.091	0.509658		-0.0249543	0.0226827	0.0916686	697	0.439	0.989697
NAD.biosynthesis.via.nicotinamide.riboside.salvage.pathway	0.0155358	0.858387	0.941961	11	0.874	0.969886		-0.0628622	8.31971e-05	0.00132236	327	0.09	0.952057
NAD.biosynthetic.process	-0.0987954	0.279302	0.556705	10	NA	NA		0.0123271	0.558371	0.728485	188	0.776	0.99426
NAD.metabolic.process	0.0803987	0.265509	0.539363	16	0.315	0.711133		0.00981423	0.645713	0.789104	183	0.76	0.99426
NADH.dehydrogenase..ubiquinone..activity	0.0302808	0.523914	0.77318	37	0.784	0.946523		-0.0286471	0.0193235	0.0817914	557	0.135	0.952057
NADP.binding	0.130804	0.00661404	0.0605172	36	0.103	0.527676		-0.0177937	0.0797275	0.218072	811	0.525	0.991234
NADP.retinol.dehydrogenase.activity	0.00576354	0.949675	0.982662	10	NA	NA		0.0283434	0.196729	0.387464	173	0.527	0.991234
NADPH.binding	0.12801	0.0972266	0.307187	14	0.285	0.689234		0.0134923	0.49435	0.678663	214	0.777	0.99426
NADPH.oxidase.complex	0.0994262	0.182434	0.441384	15	0.43	0.789722		0.00229324	0.8876	0.942051	317	0.946	0.995934
natural.killer.cell.activation	-0.12707	0.0311759	0.15518	24	0.219	0.635878		0.0141183	0.515423	0.695771	177	0.658	0.993993
natural.killer.cell.activation.involved.in.immune.response	-0.0283584	0.677013	0.859607	18	0.941	0.98941		0.0644016	0.0814763	0.221077	61	0.139	0.952057
natural.killer.cell.mediated.cytotoxicity	0.0520462	0.47103	0.735962	16	0.656	0.907273		0.0309143	0.191288	0.380677	149	0.487	0.991234
nBAF.complex	0.0504232	0.513586	0.766672	14	0.515	0.844977		-0.030593	0.00929191	0.0473991	604	0.333	0.980206
necroptotic.process	-0.170622	0.0100305	0.0773744	19	0.035	0.39712		-0.00604534	0.715194	0.836747	304	0.834	0.994939
negative.chemotaxis	0.121193	0.0118648	0.0851984	36	0.064	0.468443		-0.00807487	0.165566	0.348044	2484	0.663	0.993993
negative.regulation.by.host.of.viral.transcription	-0.0105205	0.899577	0.964213	12	0.936	0.988141		-0.043623	0.00349989	0.0229511	374	0.21	0.97695
negative.regulation.of.actin.filament.polymerization	0.0645586	0.420245	0.690687	13	0.424	0.7857		-0.0391082	0.00903232	0.046353	372	0.086	0.948547
negative.regulation.of.activated.T.cell.proliferation	-0.100686	0.247527	0.519153	11	0.214	0.633686		-0.0485313	0.0582168	0.176296	127	0.142	0.952057
negative.regulation.of.adenylate.cyclase.activity	0.0709958	0.310835	0.589072	17	0.345	0.732092		-0.0174425	0.181522	0.368554	490	0.478	0.991234
negative.regulation.of.amyloid.beta.formation	0.174426	0.0294309	0.149428	13	0.102	0.527451		-0.0372891	0.0143264	0.0657463	360	0.221	0.97695
negative.regulation.of.androgen.receptor.signaling.pathway	-0.0417754	0.57534	0.801405	15	0.622	0.892877		-0.0173933	0.0881089	0.232892	804	0.798	0.99426
negative.regulation.of.angiogenesis	0.0121532	0.716037	0.879172	75	0.745	0.93644		0.0132345	0.0257406	0.100495	2391	0.384	0.984478
negative.regulation.of.anoikis	-0.0105892	0.879848	0.953627	17	0.889	0.976758		-0.053777	3.88617e-06	0.000111727	616	0.042	0.880536
negative.regulation.of.apoptotic.process	-0.0320064	0.02049	0.120384	449	0.073	0.489517		-0.0165569	1.69325e-09	1.45508e-07	11620	0.39	0.984918
negative.regulation.of.apoptotic.signaling.pathway	0.00134482	0.981064	0.996483	26	0.986	1		-0.0265318	0.00751613	0.0404655	849	0.502	0.991234
negative.regulation.of.astrocyte.differentiation	0.0491879	0.59013	0.812673	10	NA	NA		0.0268957	0.00393019	0.0252333	962	0.487	0.991234
negative.regulation.of.ATPase.activity	-0.0650685	0.476122	0.740271	10	NA	NA		-0.0167957	0.386232	0.583916	222	0.68	0.994068
negative.regulation.of.autophagosome.assembly	0.0533043	0.522562	0.772393	12	0.561	0.87068		-0.0190714	0.251241	0.450483	302	0.602	0.991234
negative.regulation.of.autophagy	-0.000104512	0.998086	0.999433	44	1	1		-0.037667	3.60289e-05	0.000689709	1007	0.07	0.902063
negative.regulation.of.axon.extension	0.0117921	0.870272	0.948913	16	0.865	0.968601		-0.0100232	0.450151	0.642018	474	0.778	0.99426
negative.regulation.of.axon.extension.involved.in.axon.guidance	0.16972	0.00274075	0.0322415	26	0.037	0.402863		0.00417741	0.590921	0.752972	1388	0.897	0.995585
negative.regulation.of.axon.regeneration	0.101576	0.243375	0.513976	11	0.332	0.724777		-0.026941	0.048698	0.156297	447	0.419	0.98601
negative.regulation.of.axonogenesis	0.0509848	0.429906	0.699032	20	0.517	0.845036		0.0141806	0.0973018	0.24802	1145	0.713	0.99426
negative.regulation.of.B.cell.proliferation	-0.0243223	0.736232	0.889607	16	0.758	0.939063		-0.00899666	0.650142	0.79235	212	0.75	0.99426
negative.regulation.of.blood.coagulation	-0.0944616	0.221025	0.487792	14	0.428	0.788113		0.00652714	0.713493	0.835695	264	0.8	0.99426
negative.regulation.of.blood.pressure	0.048404	0.384007	0.656471	27	0.507	0.840048		-0.0213931	0.0769519	0.213361	571	0.25	0.978302
negative.regulation.of.blood.vessel.endothelial.cell.migration	-0.00265969	0.970617	0.993013	16	0.967	0.998028		-0.0545935	5.49616e-06	0.00014872	579	0.125	0.952057
negative.regulation.of.BMP.signaling.pathway	-0.0682359	0.113317	0.337029	45	0.137	0.554005		-0.026771	8.12592e-05	0.00130081	1820	0.231	0.978302
negative.regulation.of.bone.mineralization	-0.0454847	0.528739	0.77482	16	0.586	0.876126		-0.0593376	1.01606e-05	0.000242244	462	0.294	0.978302
negative.regulation.of.bone.resorption	0.0145619	0.855739	0.940571	13	0.884	0.973399		-0.0178153	0.385385	0.58377	198	0.522	0.991234
negative.regulation.of.calcineurin.NFAT.signaling.cascade	-0.023902	0.76539	0.902757	13	0.813	0.950978		-0.0624884	0.00333426	0.0221619	184	0.055	0.888636
negative.regulation.of.calcium.ion.transport	0.0310361	0.67727	0.859607	15	0.645	0.903103		-0.0534053	0.00167201	0.0133206	289	0.097	0.952057
negative.regulation.of.cAMP.mediated.signaling	0.0154074	0.847463	0.93799	13	0.857	0.966123		-0.0257463	0.0280738	0.107486	608	0.182	0.966137
negative.regulation.of.canonical.Wnt.signaling.pathway	-0.0347705	0.138093	0.378085	153	0.354	0.74097		-0.0314335	2.514e-16	9.58998e-14	5810	0.023	0.856986
negative.regulation.of.cardiac.muscle.cell.apoptotic.process	-0.0421489	0.493746	0.753965	22	0.492	0.832275		-0.0033493	0.769438	0.872852	640	0.932	0.995934
negative.regulation.of.cardiac.muscle.cell.proliferation	0.0815873	0.308395	0.586782	13	0.324	0.719863		-0.0398915	0.000396588	0.00434662	659	0.24	0.978302
negative.regulation.of.cardiac.muscle.hypertrophy	-0.0545425	0.495904	0.754356	13	0.56	0.870284		0.0121964	0.510372	0.69212	243	0.74	0.99426
negative.regulation.of.catalytic.activity	-0.0298109	0.479601	0.743684	47	0.534	0.851866		0.0162534	0.105204	0.260842	831	0.514	0.991234
negative.regulation.of.cell.adhesion	0.0171478	0.697272	0.870563	43	0.765	0.94102		0.0254518	4.21787e-05	0.000779757	2178	0.298	0.978302
negative.regulation.of.cell.cell.adhesion	0.0449626	0.546546	0.787099	15	0.521	0.846836		0.01981	0.120889	0.28389	512	0.521	0.991234
negative.regulation.of.cell.cycle	0.0565366	0.240483	0.510559	36	0.315	0.711133		-0.00987494	0.221577	0.417683	1284	0.528	0.991234
negative.regulation.of.cell.cycle.arrest	-0.104643	0.114308	0.338398	19	0.101	0.52616		-0.0450531	0.000471535	0.00501006	503	0.311	0.979216
negative.regulation.of.cell.death	0.0265928	0.515443	0.768029	50	0.569	0.872314		-0.012765	0.0912507	0.23786	1468	0.385	0.984478
negative.regulation.of.cell.differentiation	-0.10637	0.0199354	0.119249	40	0.111	0.533722		-0.0346163	0.000709725	0.00690276	800	0.125	0.952057
negative.regulation.of.cell.growth	-0.0431603	0.114824	0.33861	112	0.108	0.530481		-0.0262748	6.40015e-07	2.46547e-05	3032	0.326	0.980206
negative.regulation.of.cell.matrix.adhesion	0.0373039	0.594368	0.81371	17	0.563	0.87224		-0.0238835	0.0228712	0.0921683	759	0.357	0.980215
negative.regulation.of.cell.migration	-0.0103023	0.720676	0.881032	101	0.753	0.938487		-0.0224266	5.44482e-08	2.92636e-06	5005	0.04	0.879887
negative.regulation.of.cell.migration.involved.in.sprouting.angiogenesis	-0.0581498	0.45123	0.719891	14	0.598	0.884636		0.0191589	0.113523	0.273433	570	0.55	0.991234
negative.regulation.of.cell.motility	0.136592	0.101325	0.313088	12	0.124	0.545766		0.064588	3.28636e-05	0.000639354	345	0.02	0.833604
negative.regulation.of.cell.proliferation	0.00355031	0.816504	0.924385	364	0.893	0.977782		-0.003018	0.278649	0.481076	11291	0.849	0.994939
negative.regulation.of.cell.substrate.adhesion	0.0449354	0.533729	0.777826	16	0.572	0.872314		-0.023852	0.0378978	0.131892	633	0.444	0.99065
negative.regulation.of.cellular.senescence	-0.128139	0.059813	0.230621	18	0.034	0.394715		-0.0674088	9.1647e-09	6.25921e-07	607	0.026	0.857677
negative.regulation.of.chondrocyte.differentiation	-0.0065132	0.919679	0.971422	20	0.926	0.986858		0.00224134	0.825733	0.904512	807	0.93	0.995934
negative.regulation.of.chromatin.silencing	0.0508275	0.495496	0.754356	15	0.579	0.872732		0.0253983	0.215906	0.41043	198	0.632	0.991698
negative.regulation.of.cold.induced.thermogenesis	0.0168302	0.692946	0.868654	46	0.737	0.930472		-0.0214573	0.00268088	0.0188784	1643	0.416	0.985625
negative.regulation.of.cyclin.dependent.protein.serine.threonine.kinase.activity	-0.106678	0.0467834	0.198072	29	0.099	0.524311		-0.0272481	0.0198019	0.0832755	611	0.47	0.991234
negative.regulation.of.cysteine.type.endopeptidase.activity.involved.in.apoptotic.process	-0.0354384	0.323266	0.603041	65	0.392	0.764378		-0.00540017	0.432017	0.627015	1778	0.843	0.994939
negative.regulation.of.cytokine.production	0.0195792	0.806889	0.918903	13	0.793	0.948795		-0.088236	3.77965e-06	0.000109339	229	0.046	0.887495
negative.regulation.of.cytokine.production.involved.in.inflammatory.response	-0.0955252	0.172684	0.427006	17	0.217	0.635878		0.0106918	0.556783	0.727553	252	0.751	0.99426
negative.regulation.of.cytokine.secretion	-0.0612344	0.427586	0.696883	14	0.495	0.832759		-0.0940012	3.87732e-14	9.05095e-12	541	0.041	0.880536
negative.regulation.of.cytosolic.calcium.ion.concentration	0.0476696	0.584046	0.80863	11	0.679	0.912097		-0.0224467	0.0718935	0.203477	537	0.554	0.991234
negative.regulation.of.DNA.binding	-0.106614	0.0432836	0.191057	30	0.04	0.407674		-0.01754	0.0522644	0.164272	1025	0.468	0.991234
[truncated: 2,010 more rows]

## Sheet: MGI
	Genes							Noncoding Regions
[truncated: 4,575 more rows]

## Sheet: gTex tissue
	Genes							Noncoding Regions
[truncated: 32 more rows]

## Sheet: miRNA
	stat	pval	p.adj	num.genes	permPval	permPadj
[truncated: 741 more rows]
