# Supplementary figures and images for: Complementary evolution of coding and noncoding sequence underlies mammalian hairlessness
Source: eLife journal article supplement (doi:10.7554/elife.76911), 2022-11-07

MYH4: rho = 0.297, p.adj = 0.205

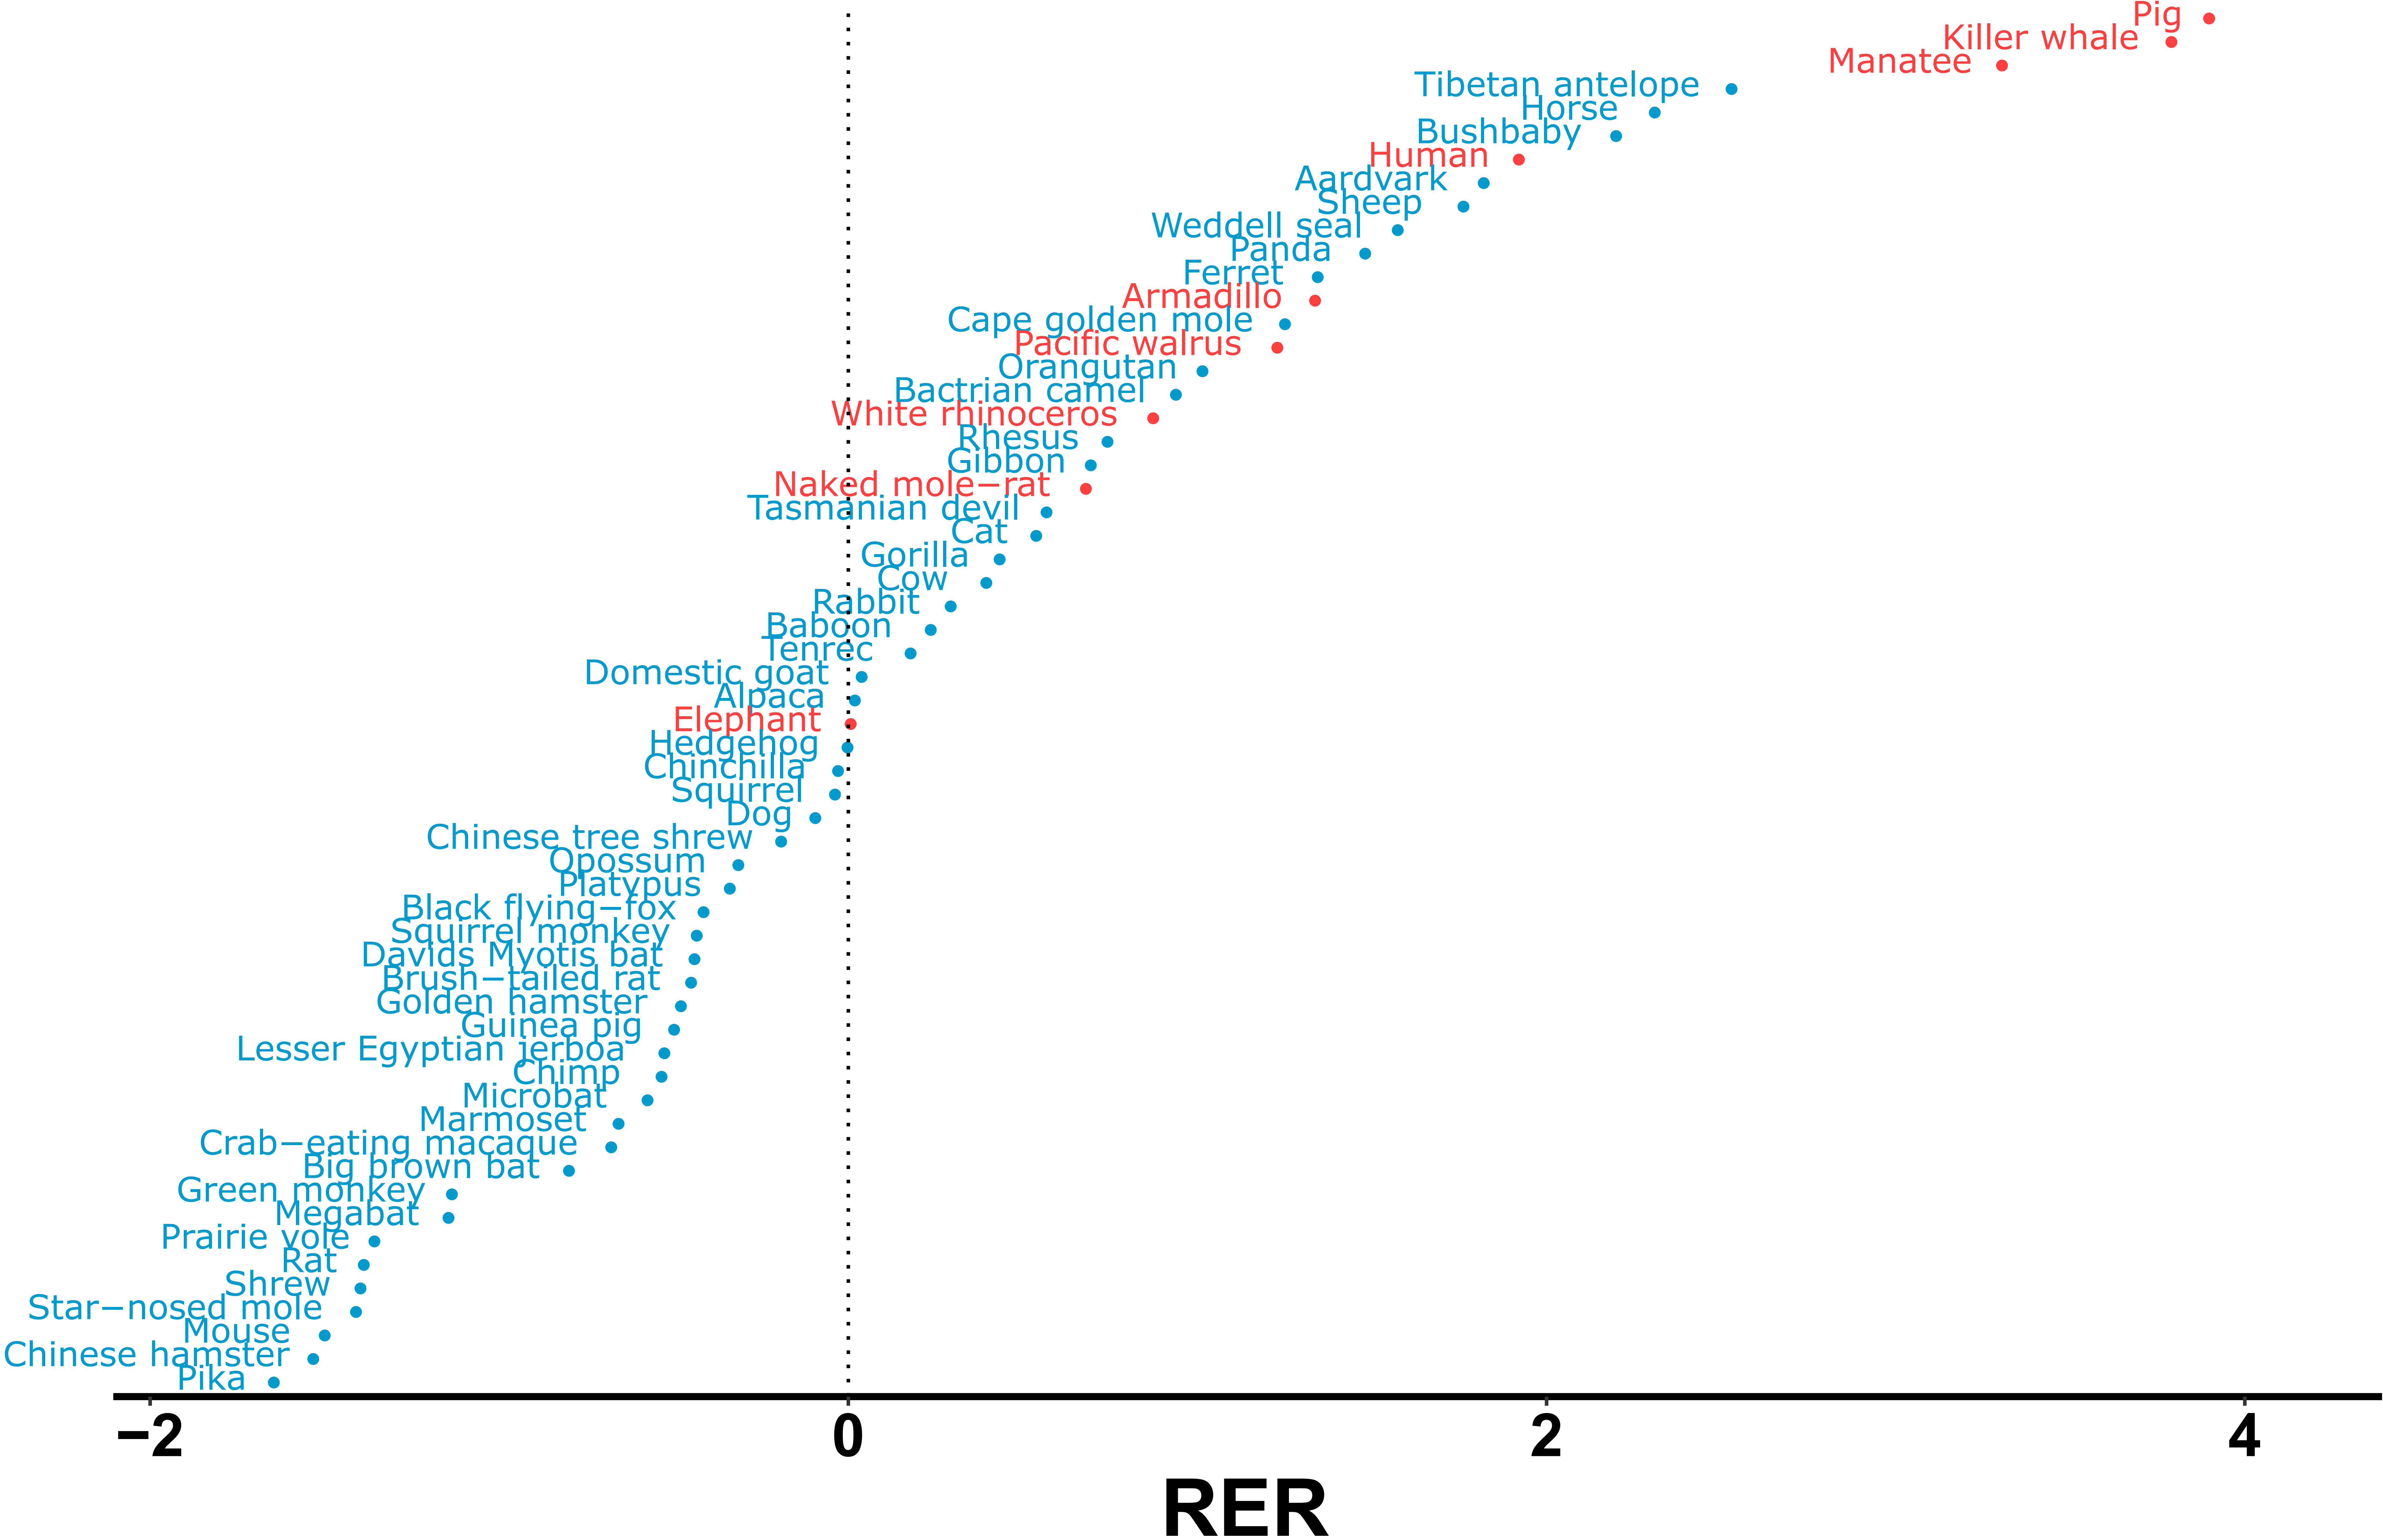

Supplement: supp [file elife_poa_e76911_Figure_1_figure_supplement_10.pdf › elife_poa_e76911_Figure_1_figure_supplement_10.pdf]

KRT35: rho = 0.293, p.adj = 0.205

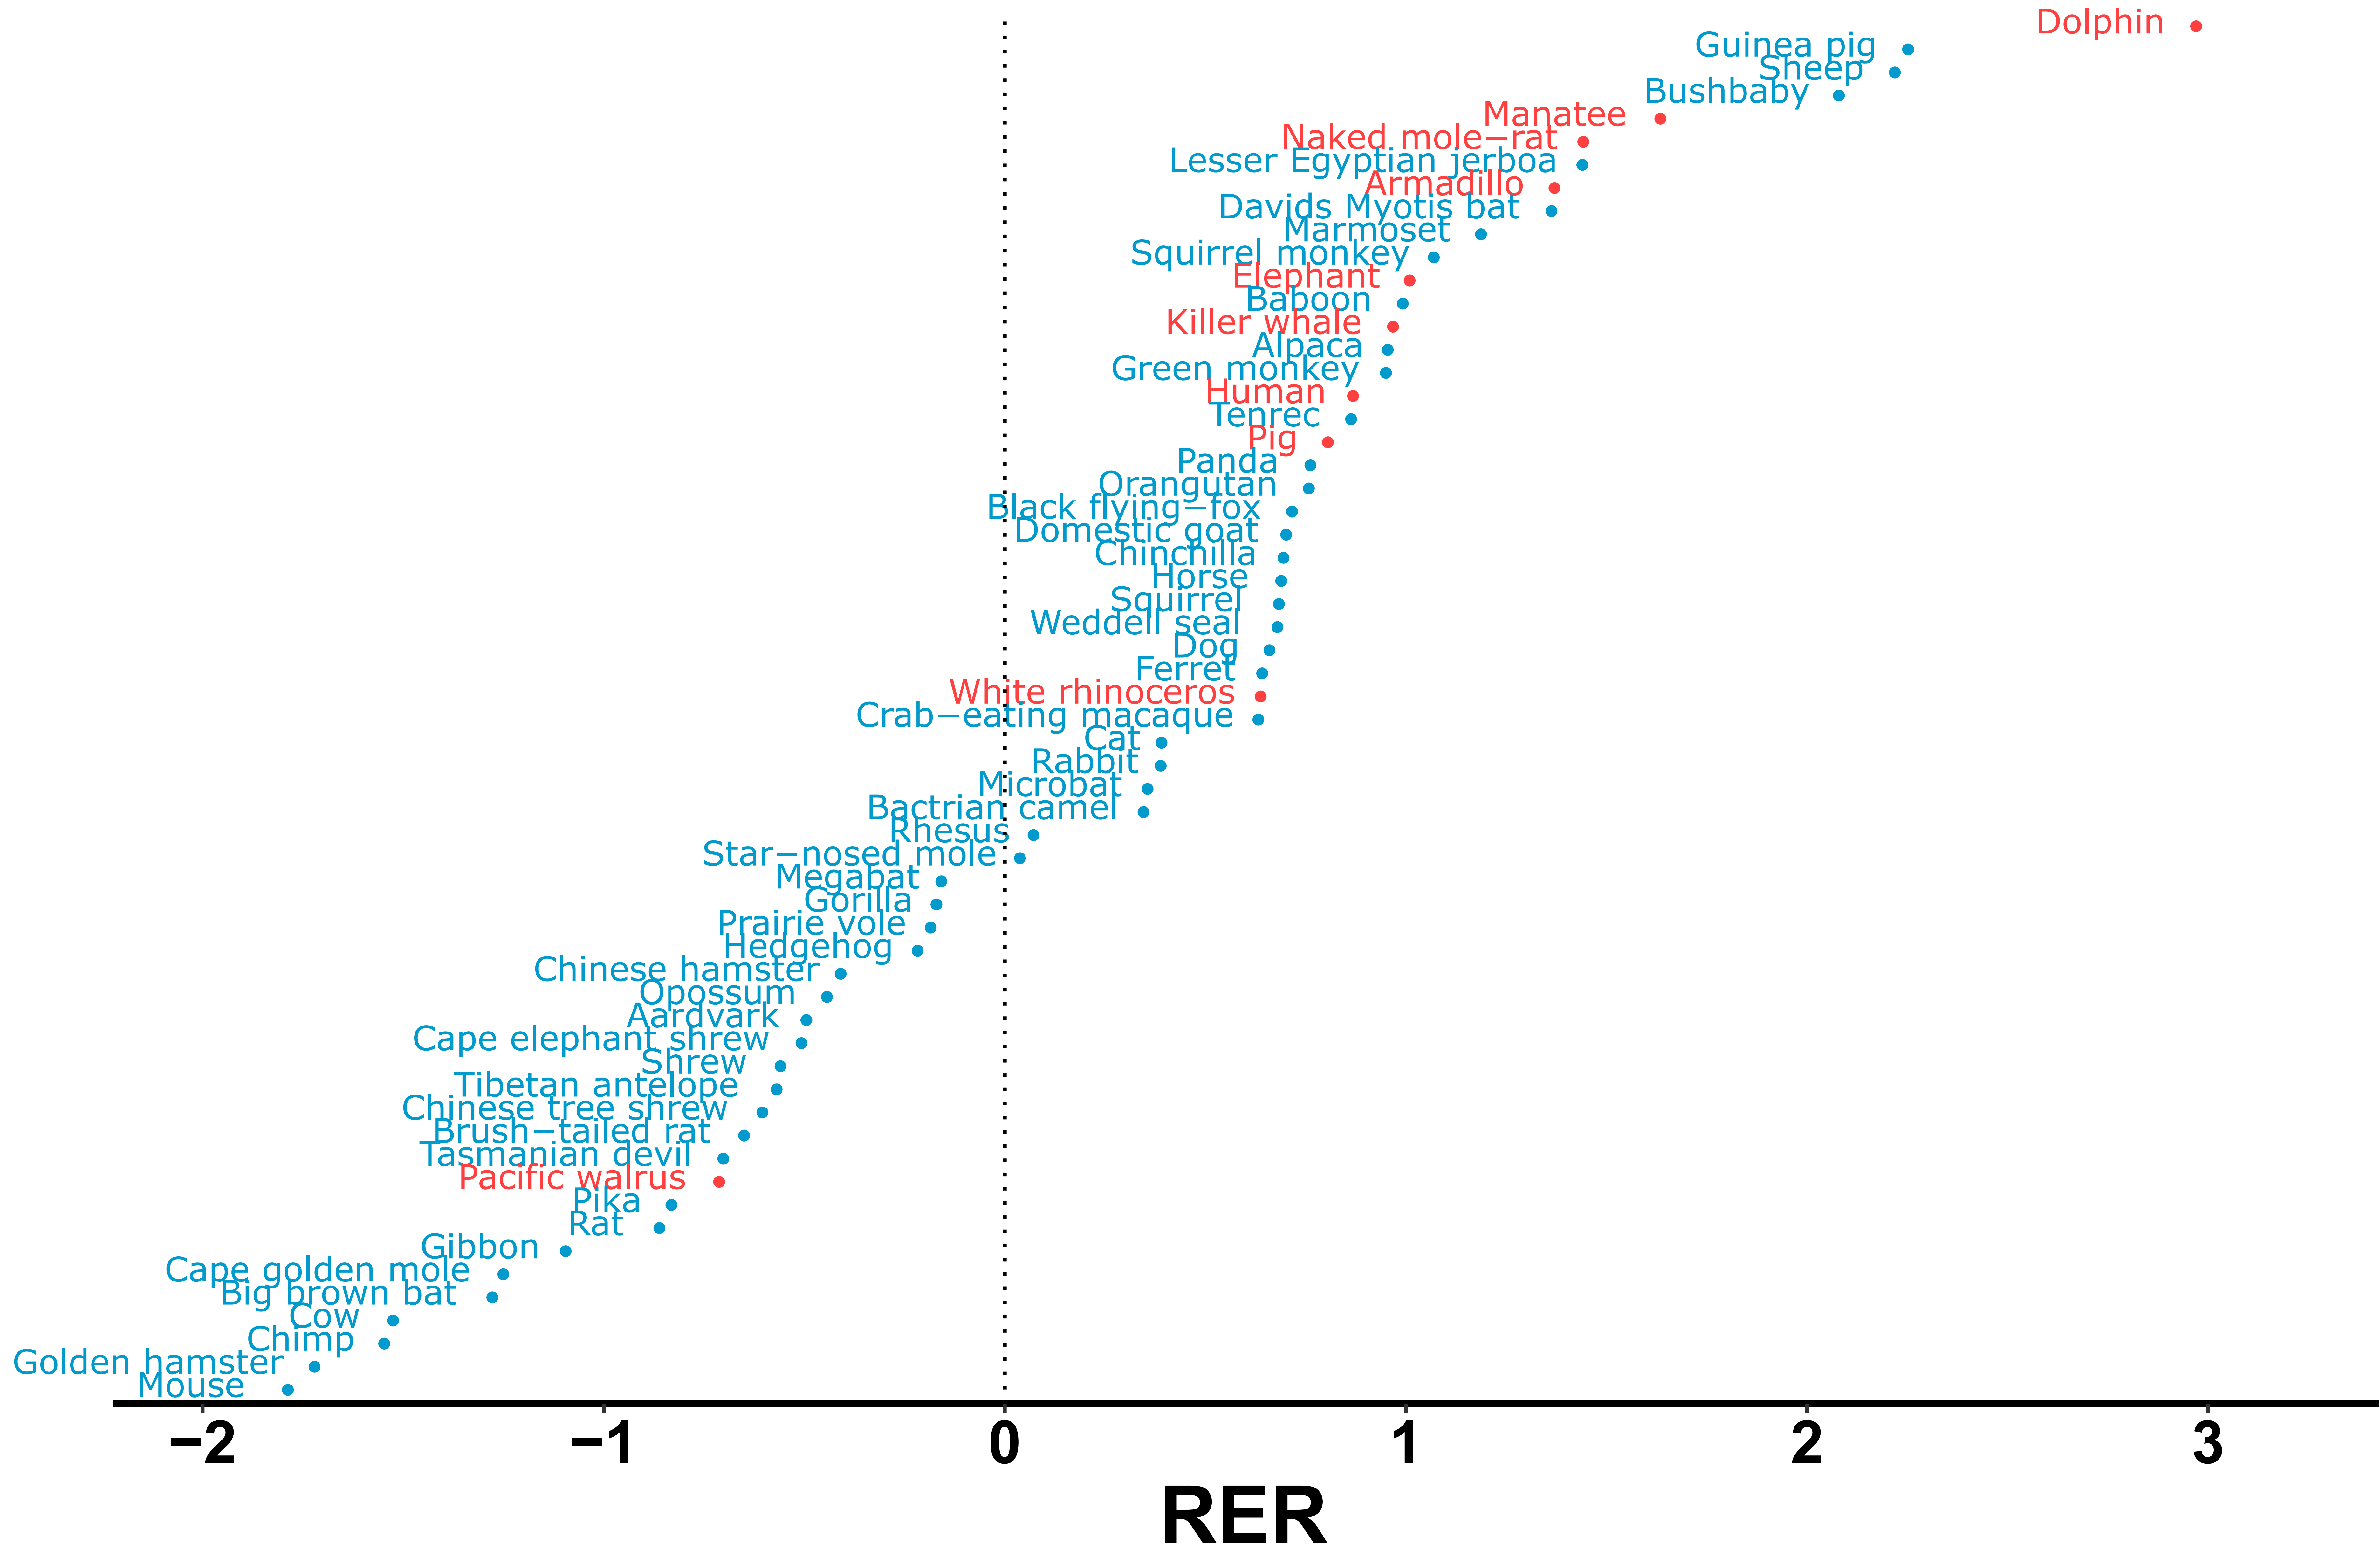

Supplement: supp [file elife_poa_e76911_Figure_1_figure_supplement_11.pdf › elife_poa_e76911_Figure_1_figure_supplement_11.pdf]

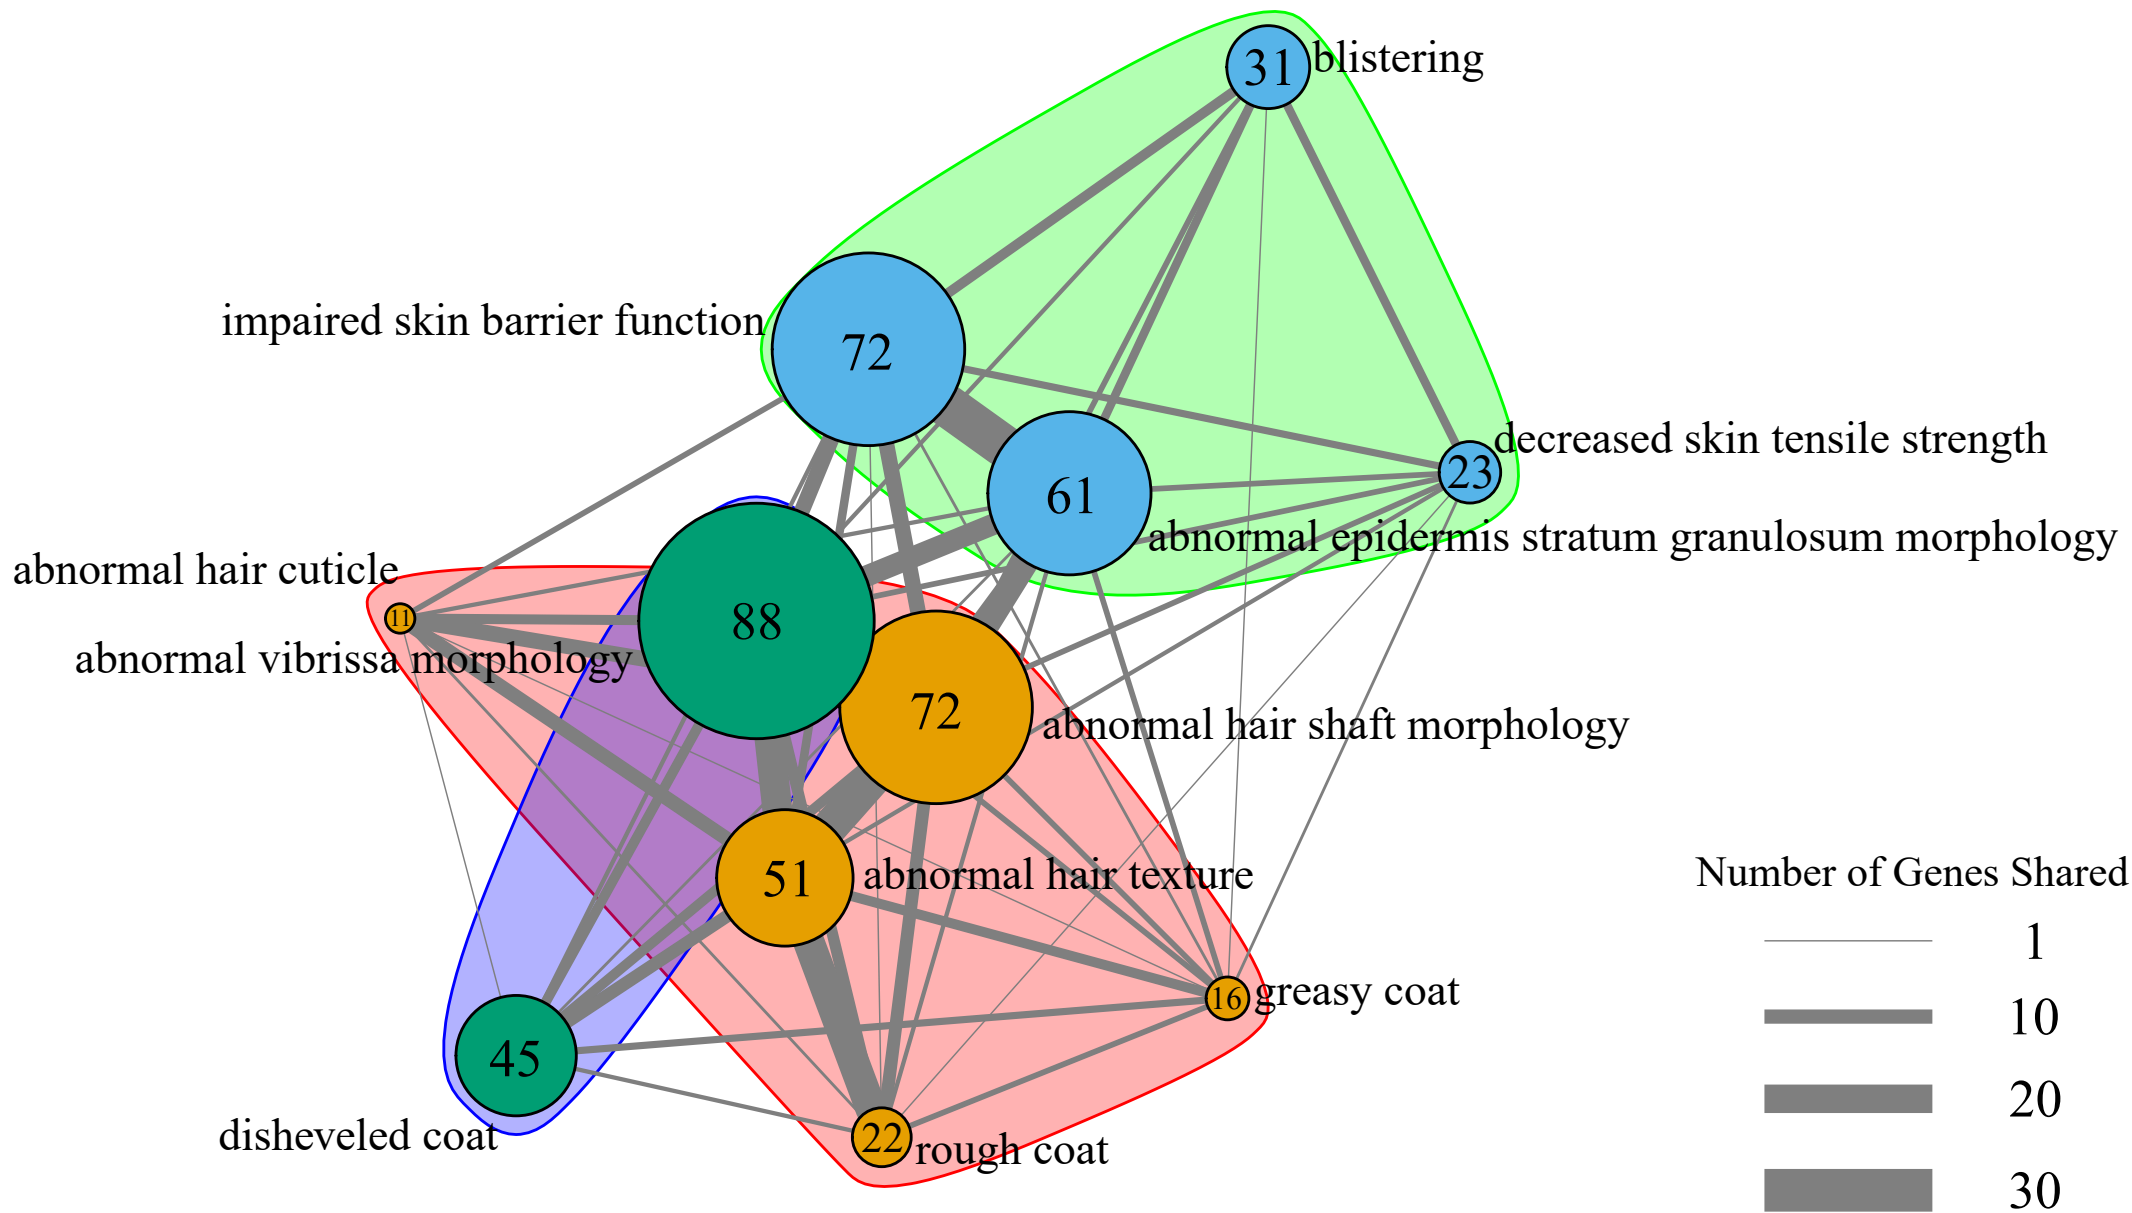

Supplement: supp [file elife_poa_e76911_Figure_1_figure_supplement_2.pdf › elife_poa_e76911_Figure_1_figure_supplement_2.pdf]

Number of Genes Shared

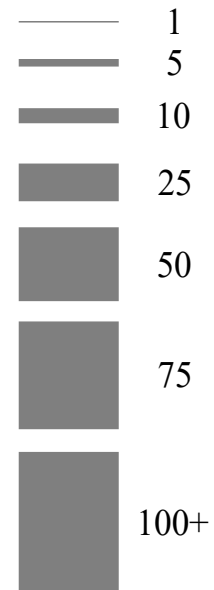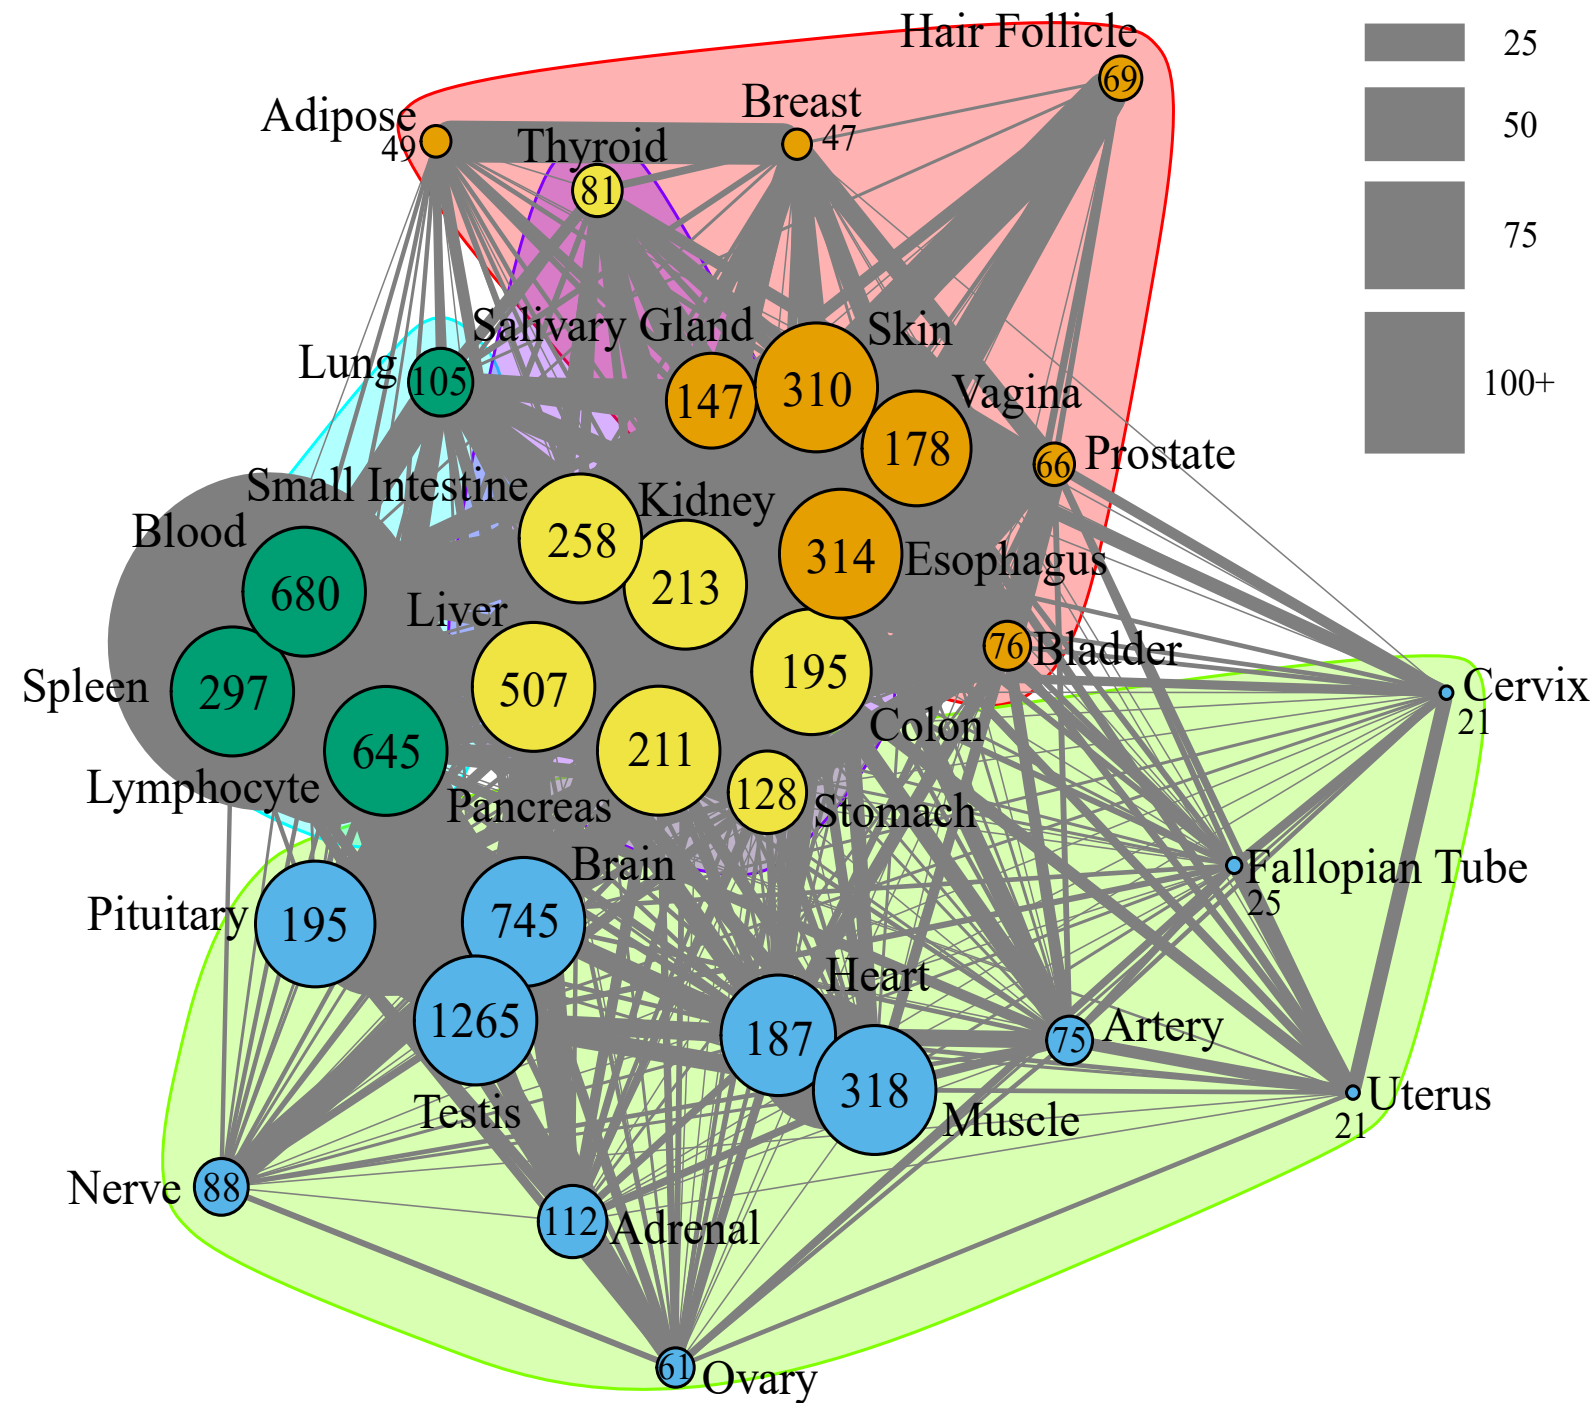

Supplement: supp [file elife_poa_e76911_Figure_1_figure_supplement_3.pdf › elife_poa_e76911_Figure_1_figure_supplement_3.pdf]

**FGF11: rho = 0.403, p.adj = 0.205**

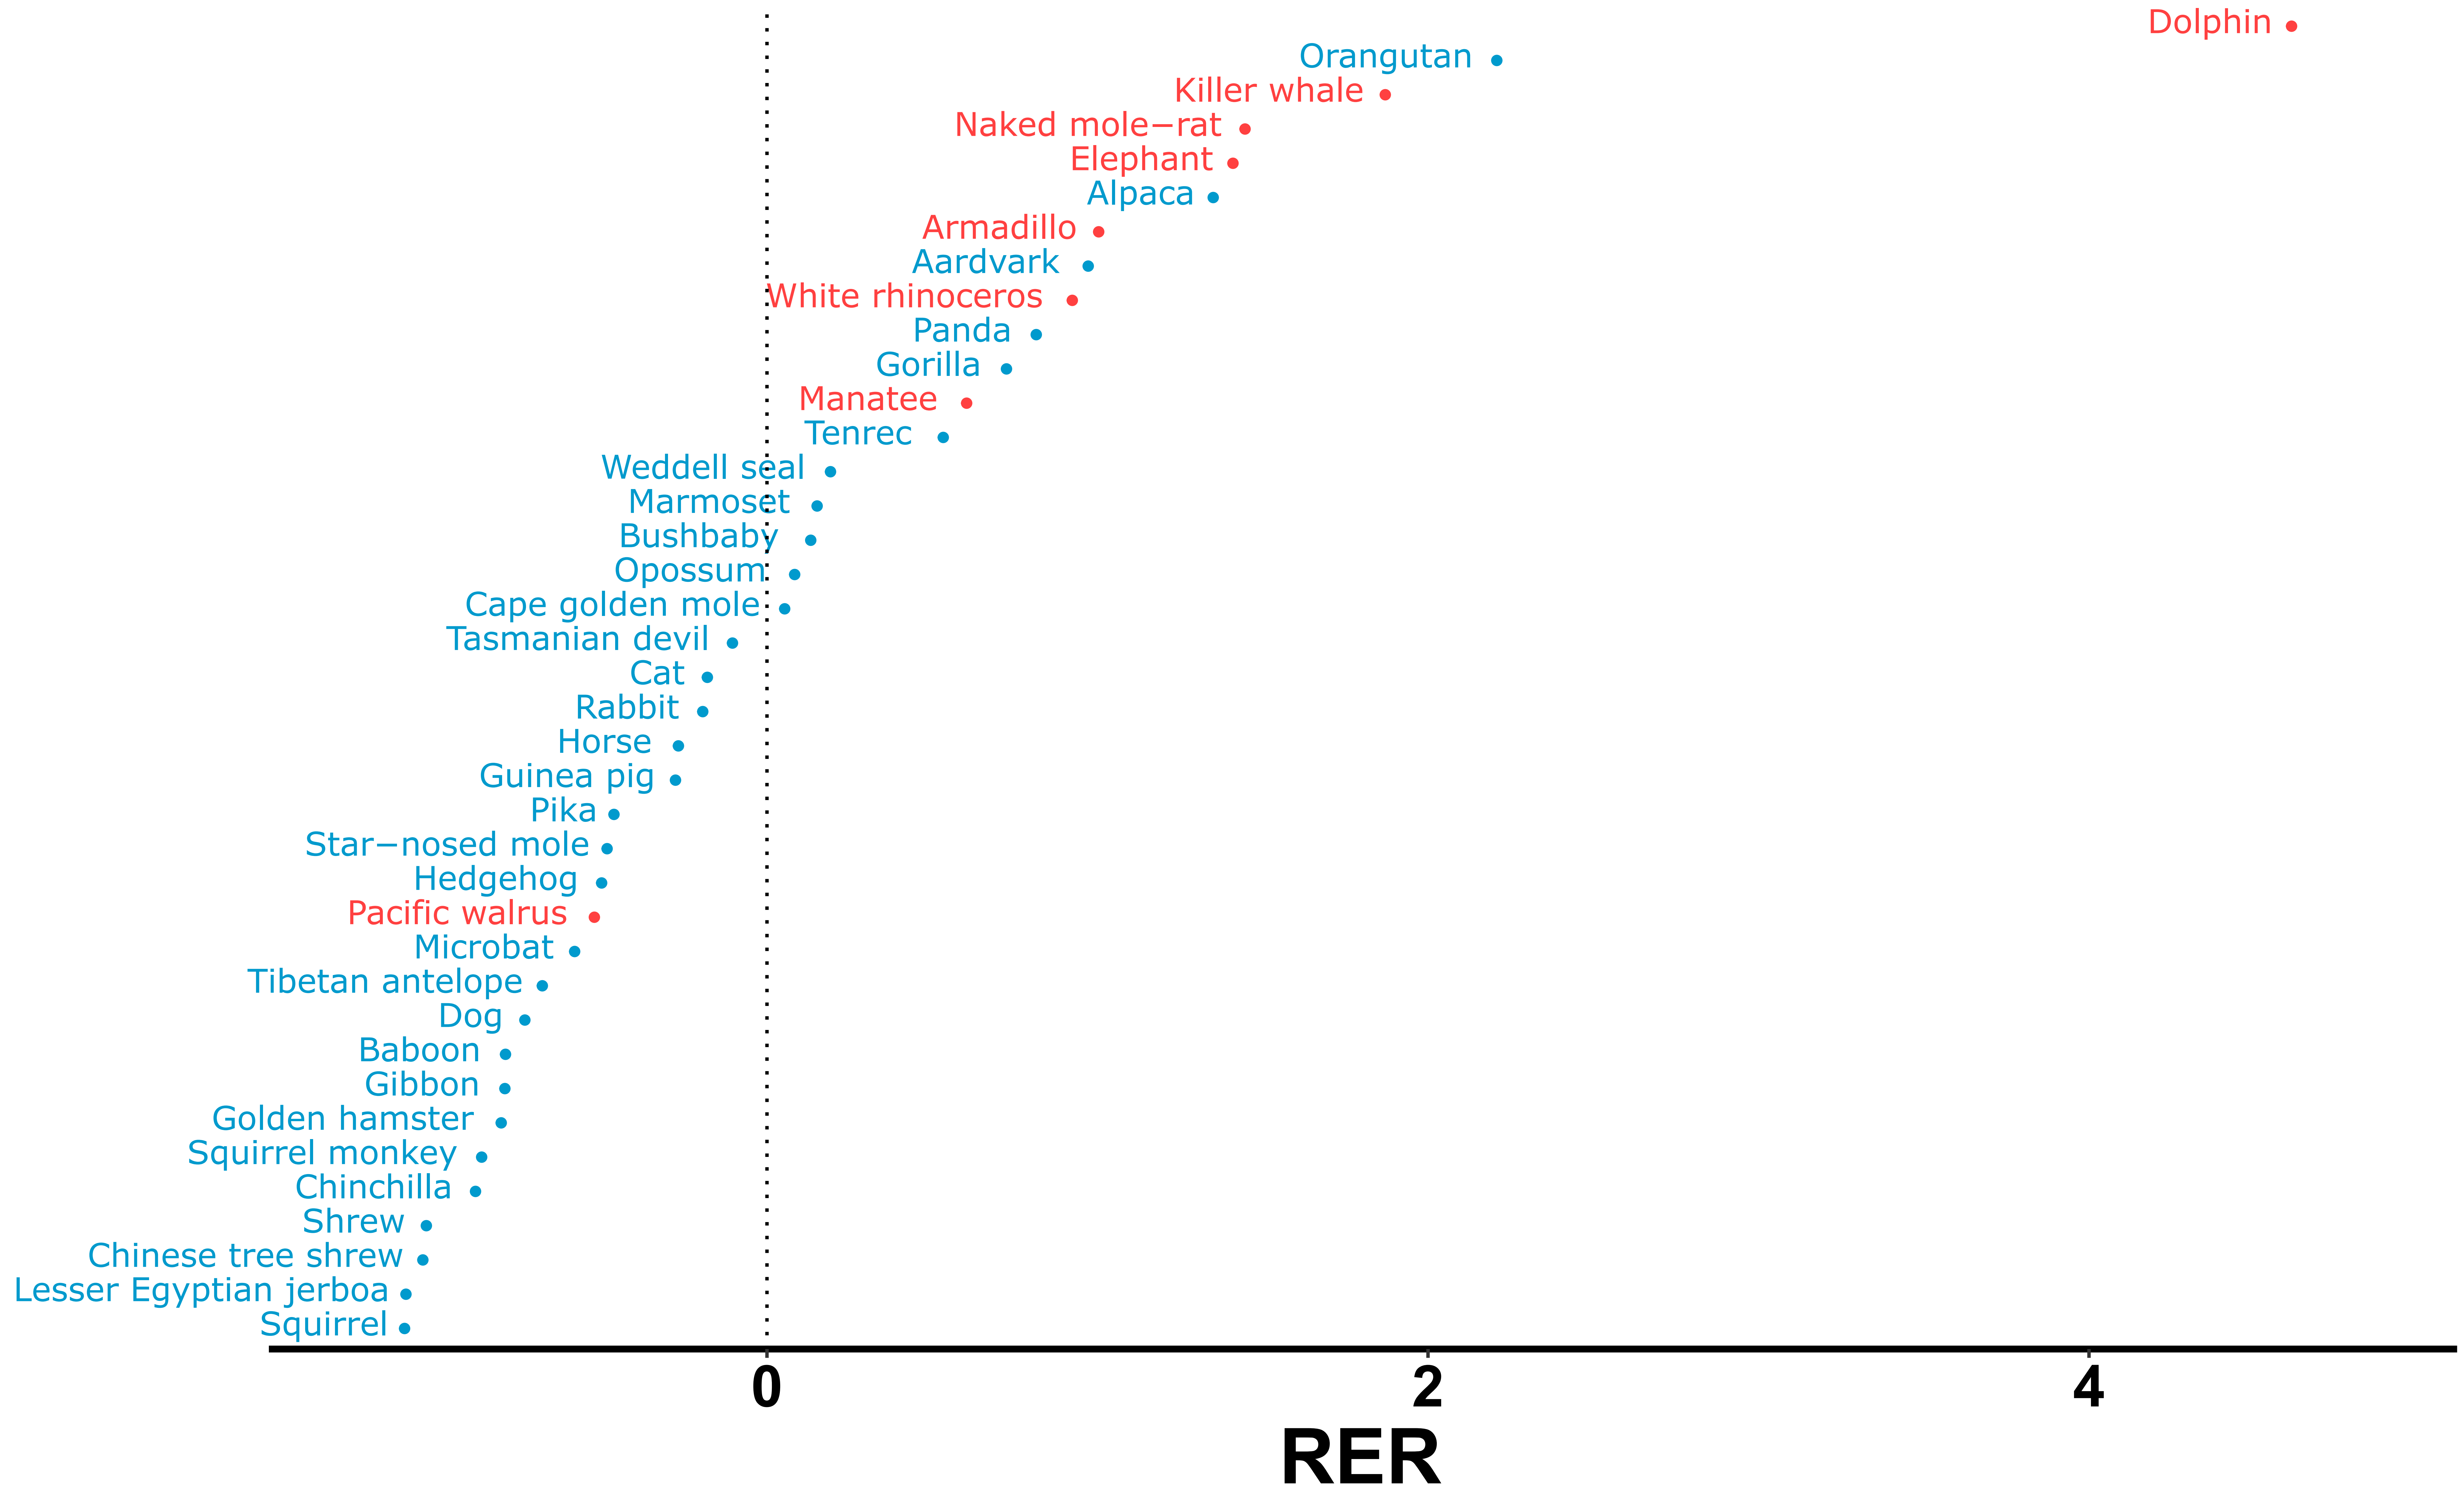

Supplement: supp [file elife_poa_e76911_Figure_1_figure_supplement_4.pdf › elife_poa_e76911_Figure_1_figure_supplement_4.pdf]

GLRA4: rho = 0.332, p.adj = 0.179

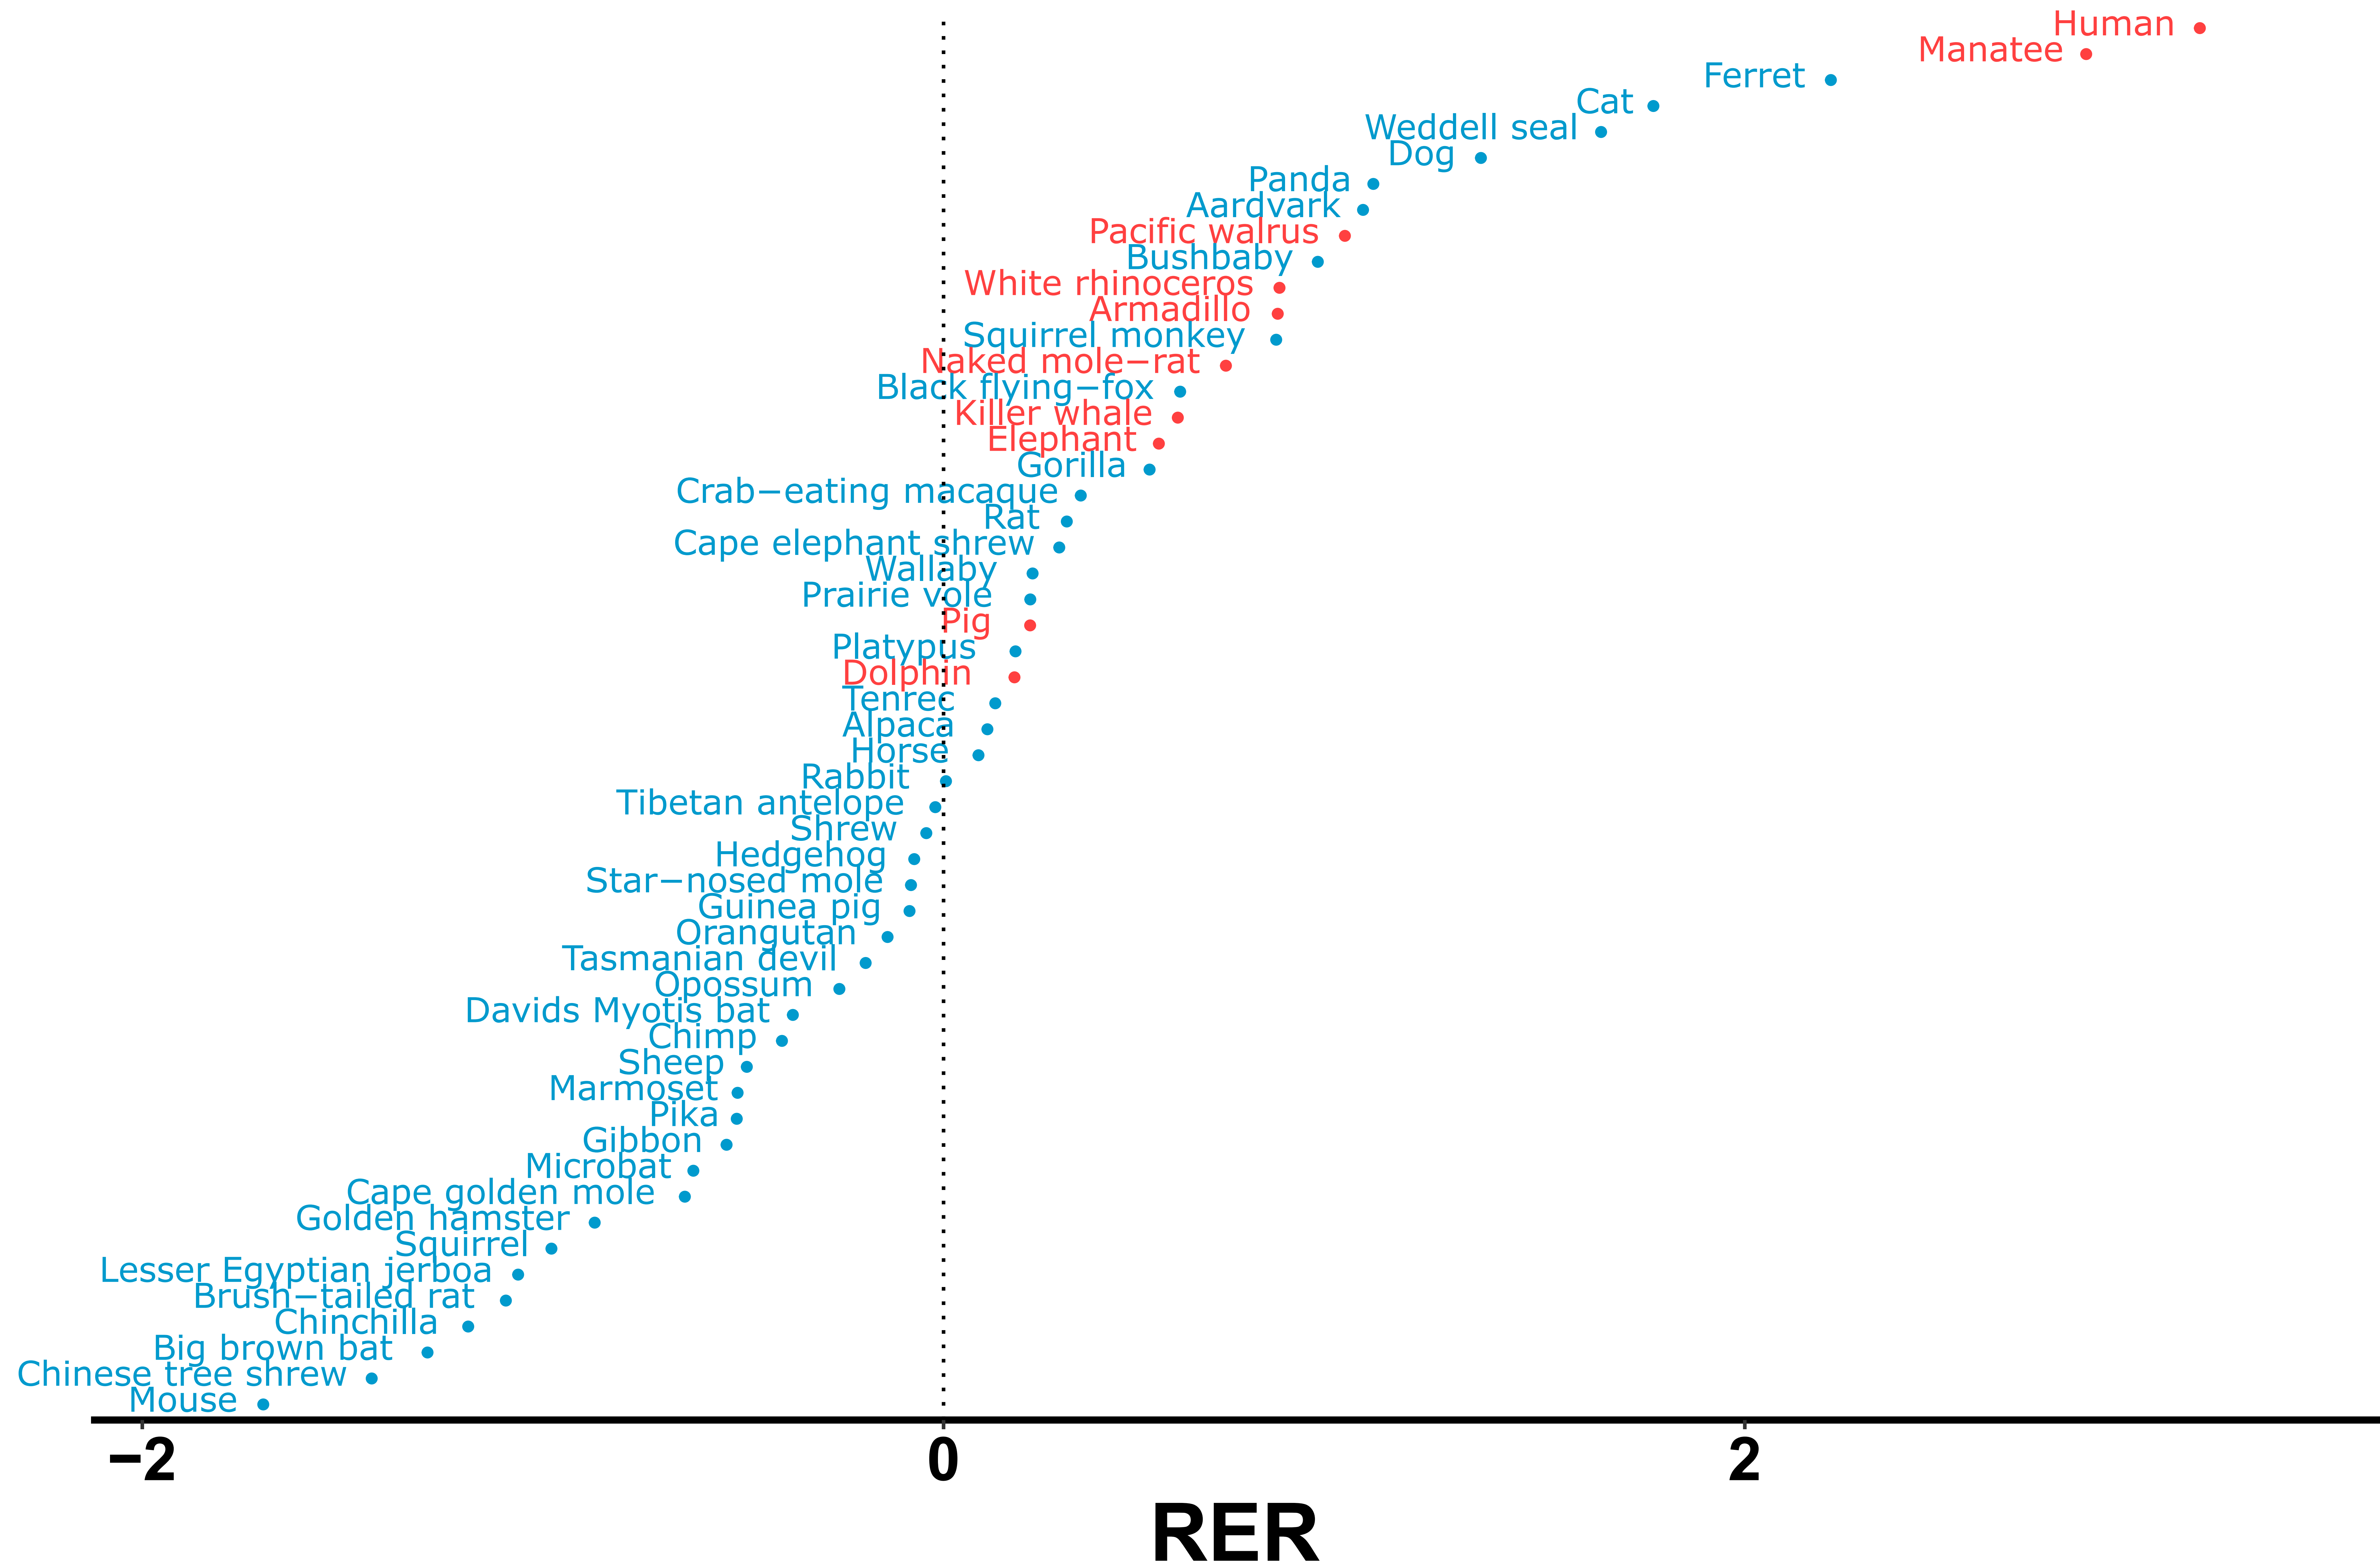

Supplement: supp [file elife_poa_e76911_Figure_1_figure_supplement_5.pdf › elife_poa_e76911_Figure_1_figure_supplement_5.pdf]

**ANXA11: rho = 0.328, p.adj = 0.179**

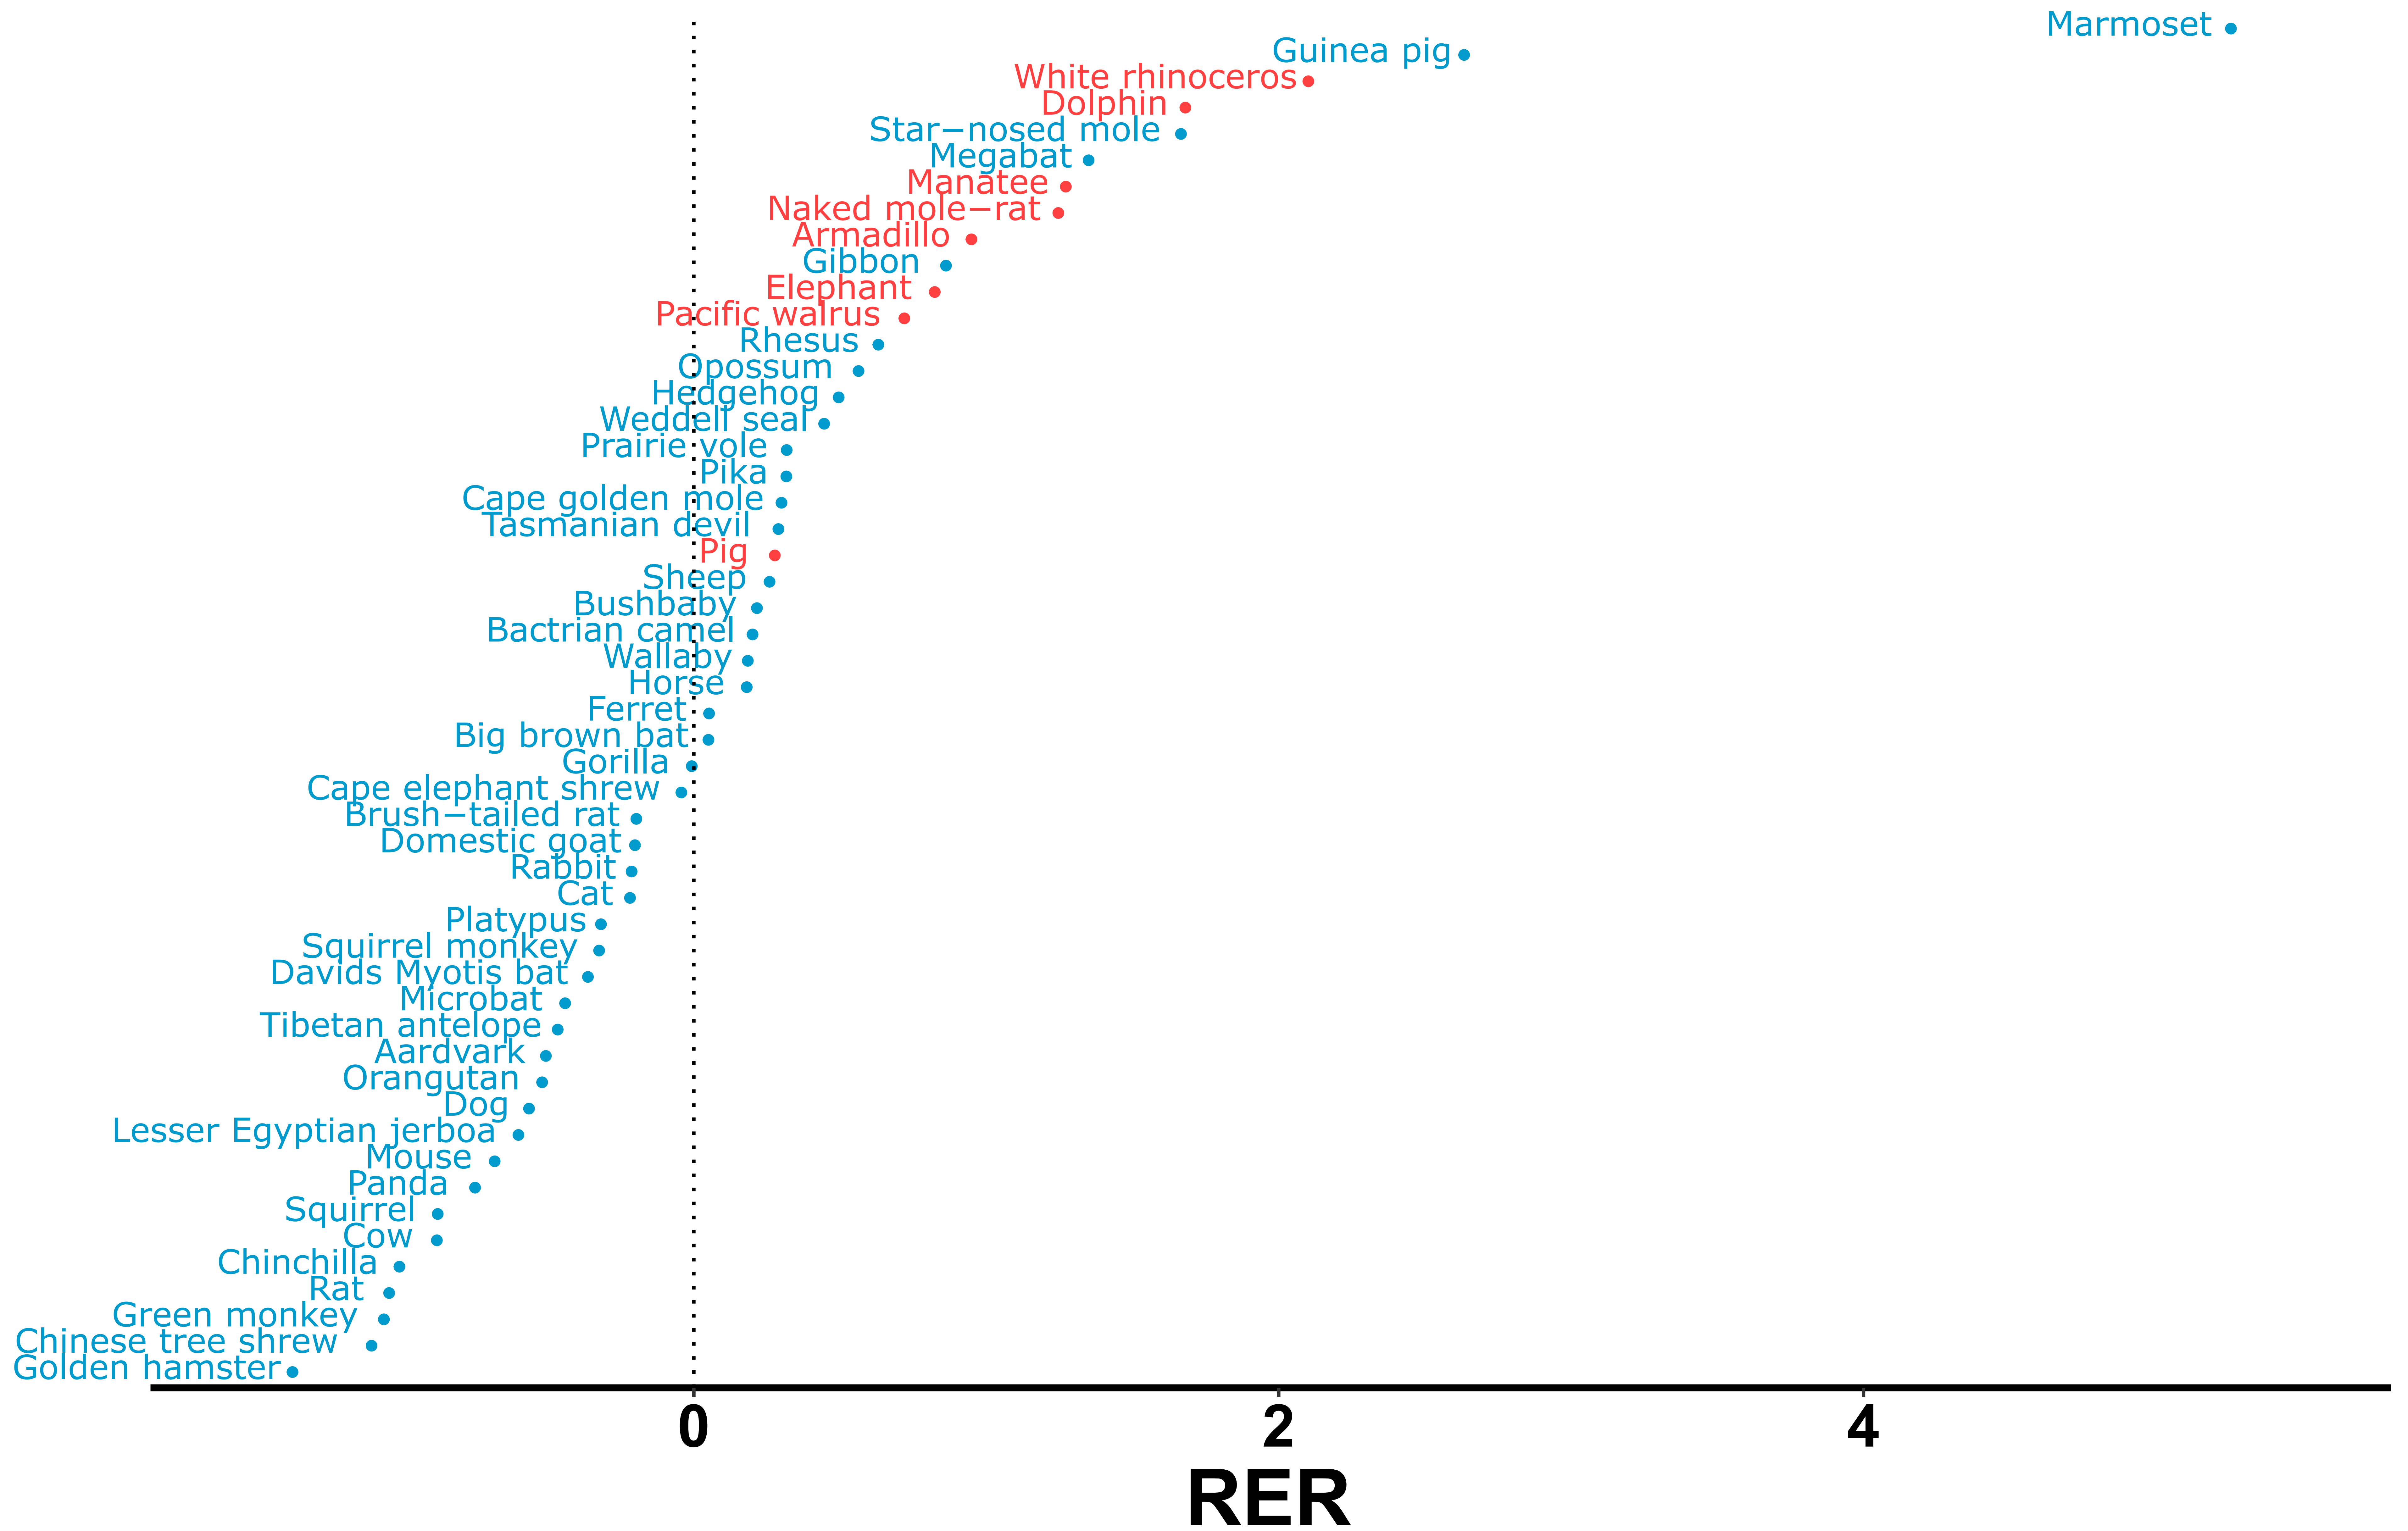

Supplement: supp [file elife_poa_e76911_Figure_1_figure_supplement_6.pdf › elife_poa_e76911_Figure_1_figure_supplement_6.pdf]

**PTPRM: rho = 0.326, p.adj = 0.179**

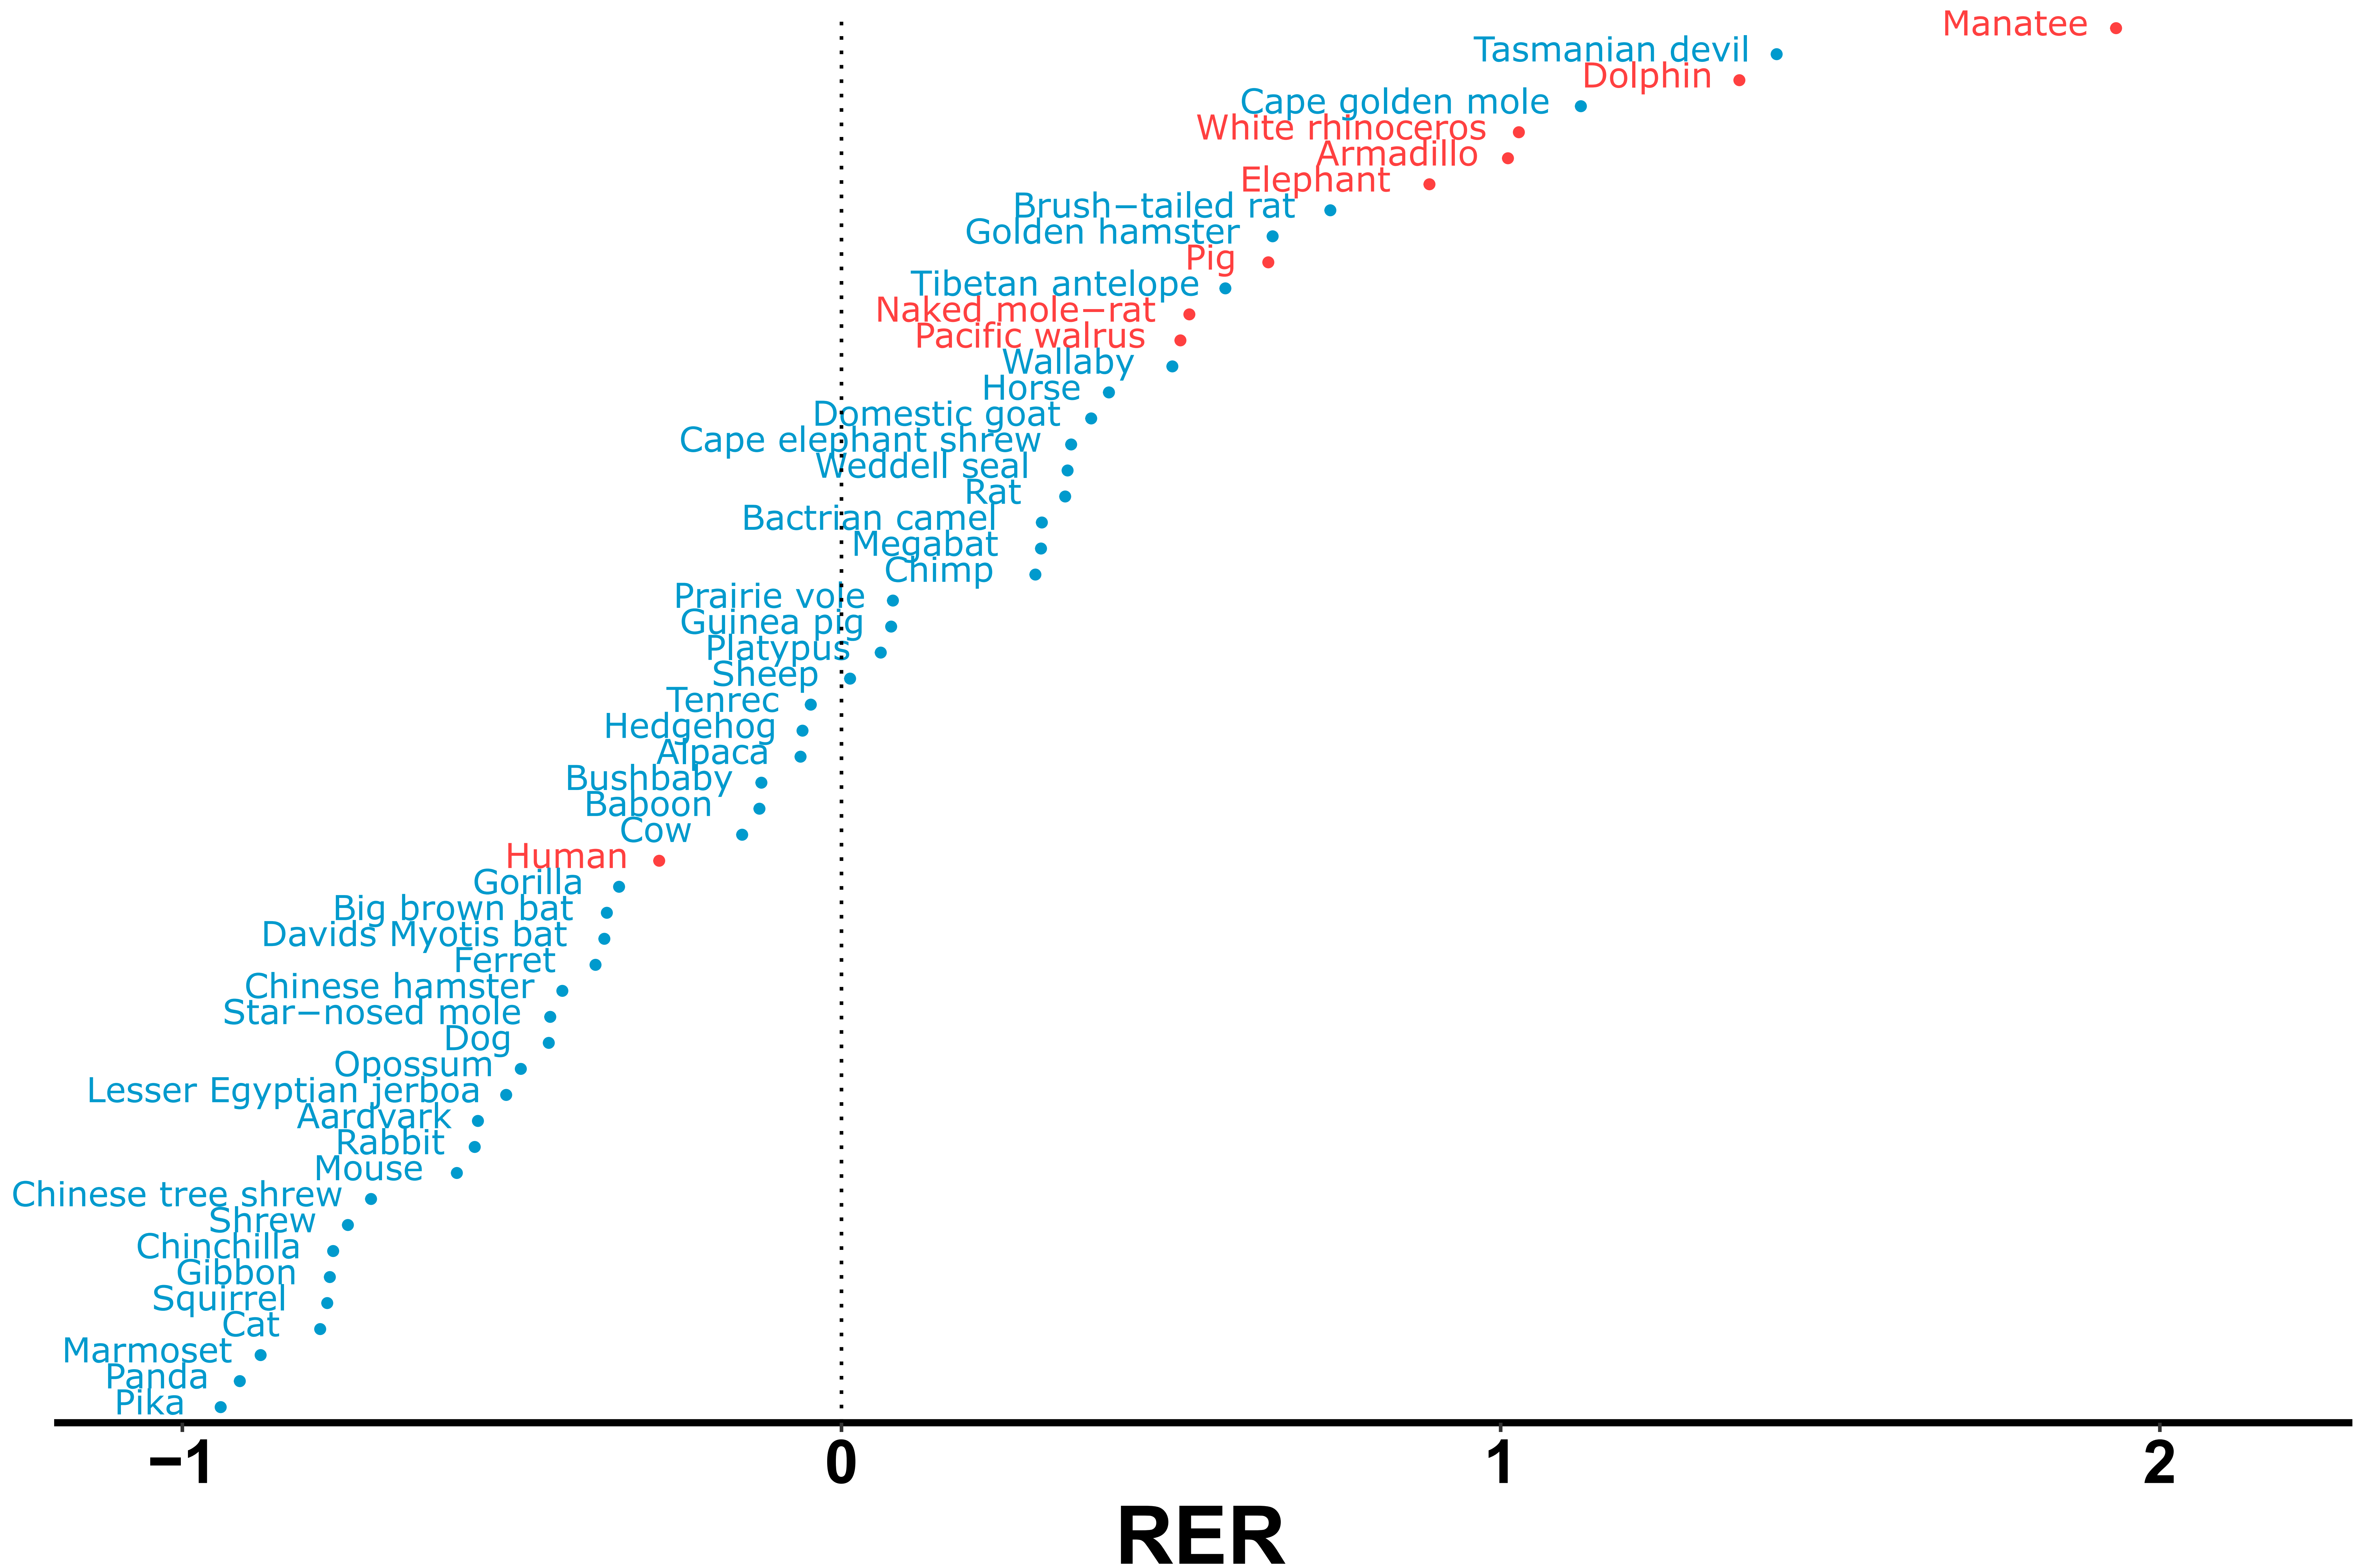

Supplement: supp [file elife_poa_e76911_Figure_1_figure_supplement_7.pdf › elife_poa_e76911_Figure_1_figure_supplement_7.pdf]

PKP1: rho = 0.323, p.adj = 0.179

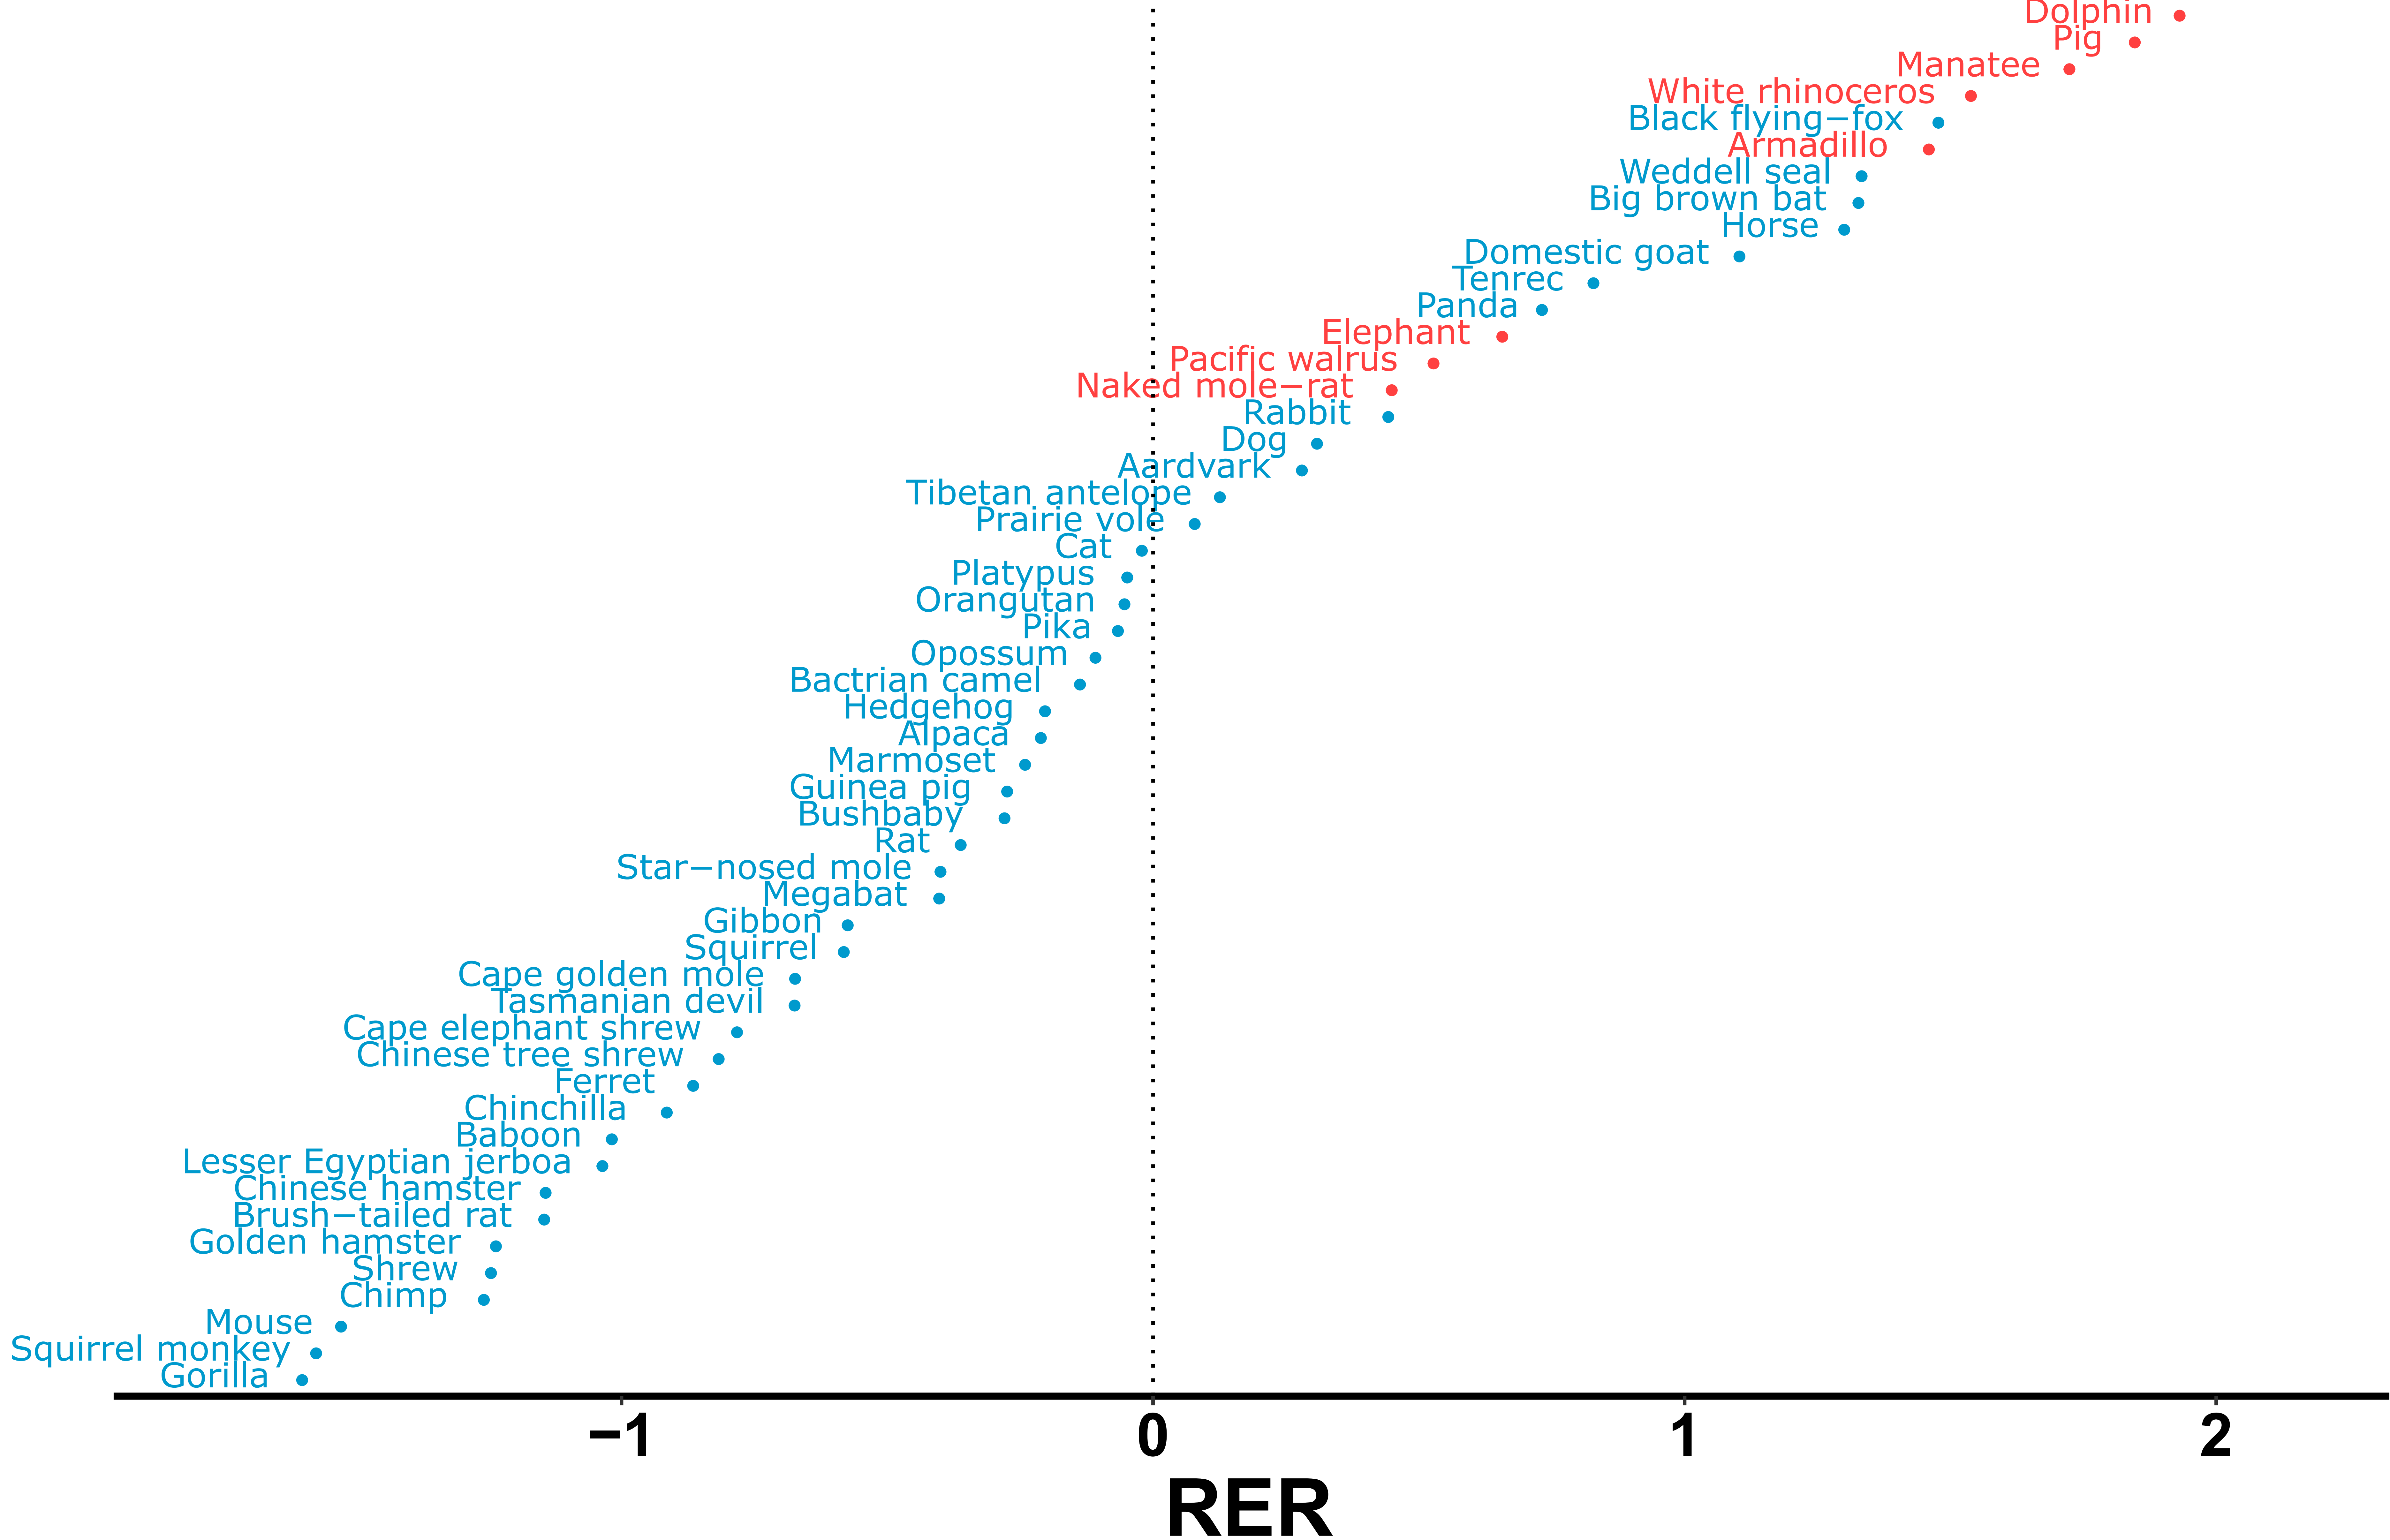

Supplement: supp [file elife_poa_e76911_Figure_1_figure_supplement_8.pdf › elife_poa_e76911_Figure_1_figure_supplement_8.pdf]

KRT2: rho = 0.304, p.adj = 0.205

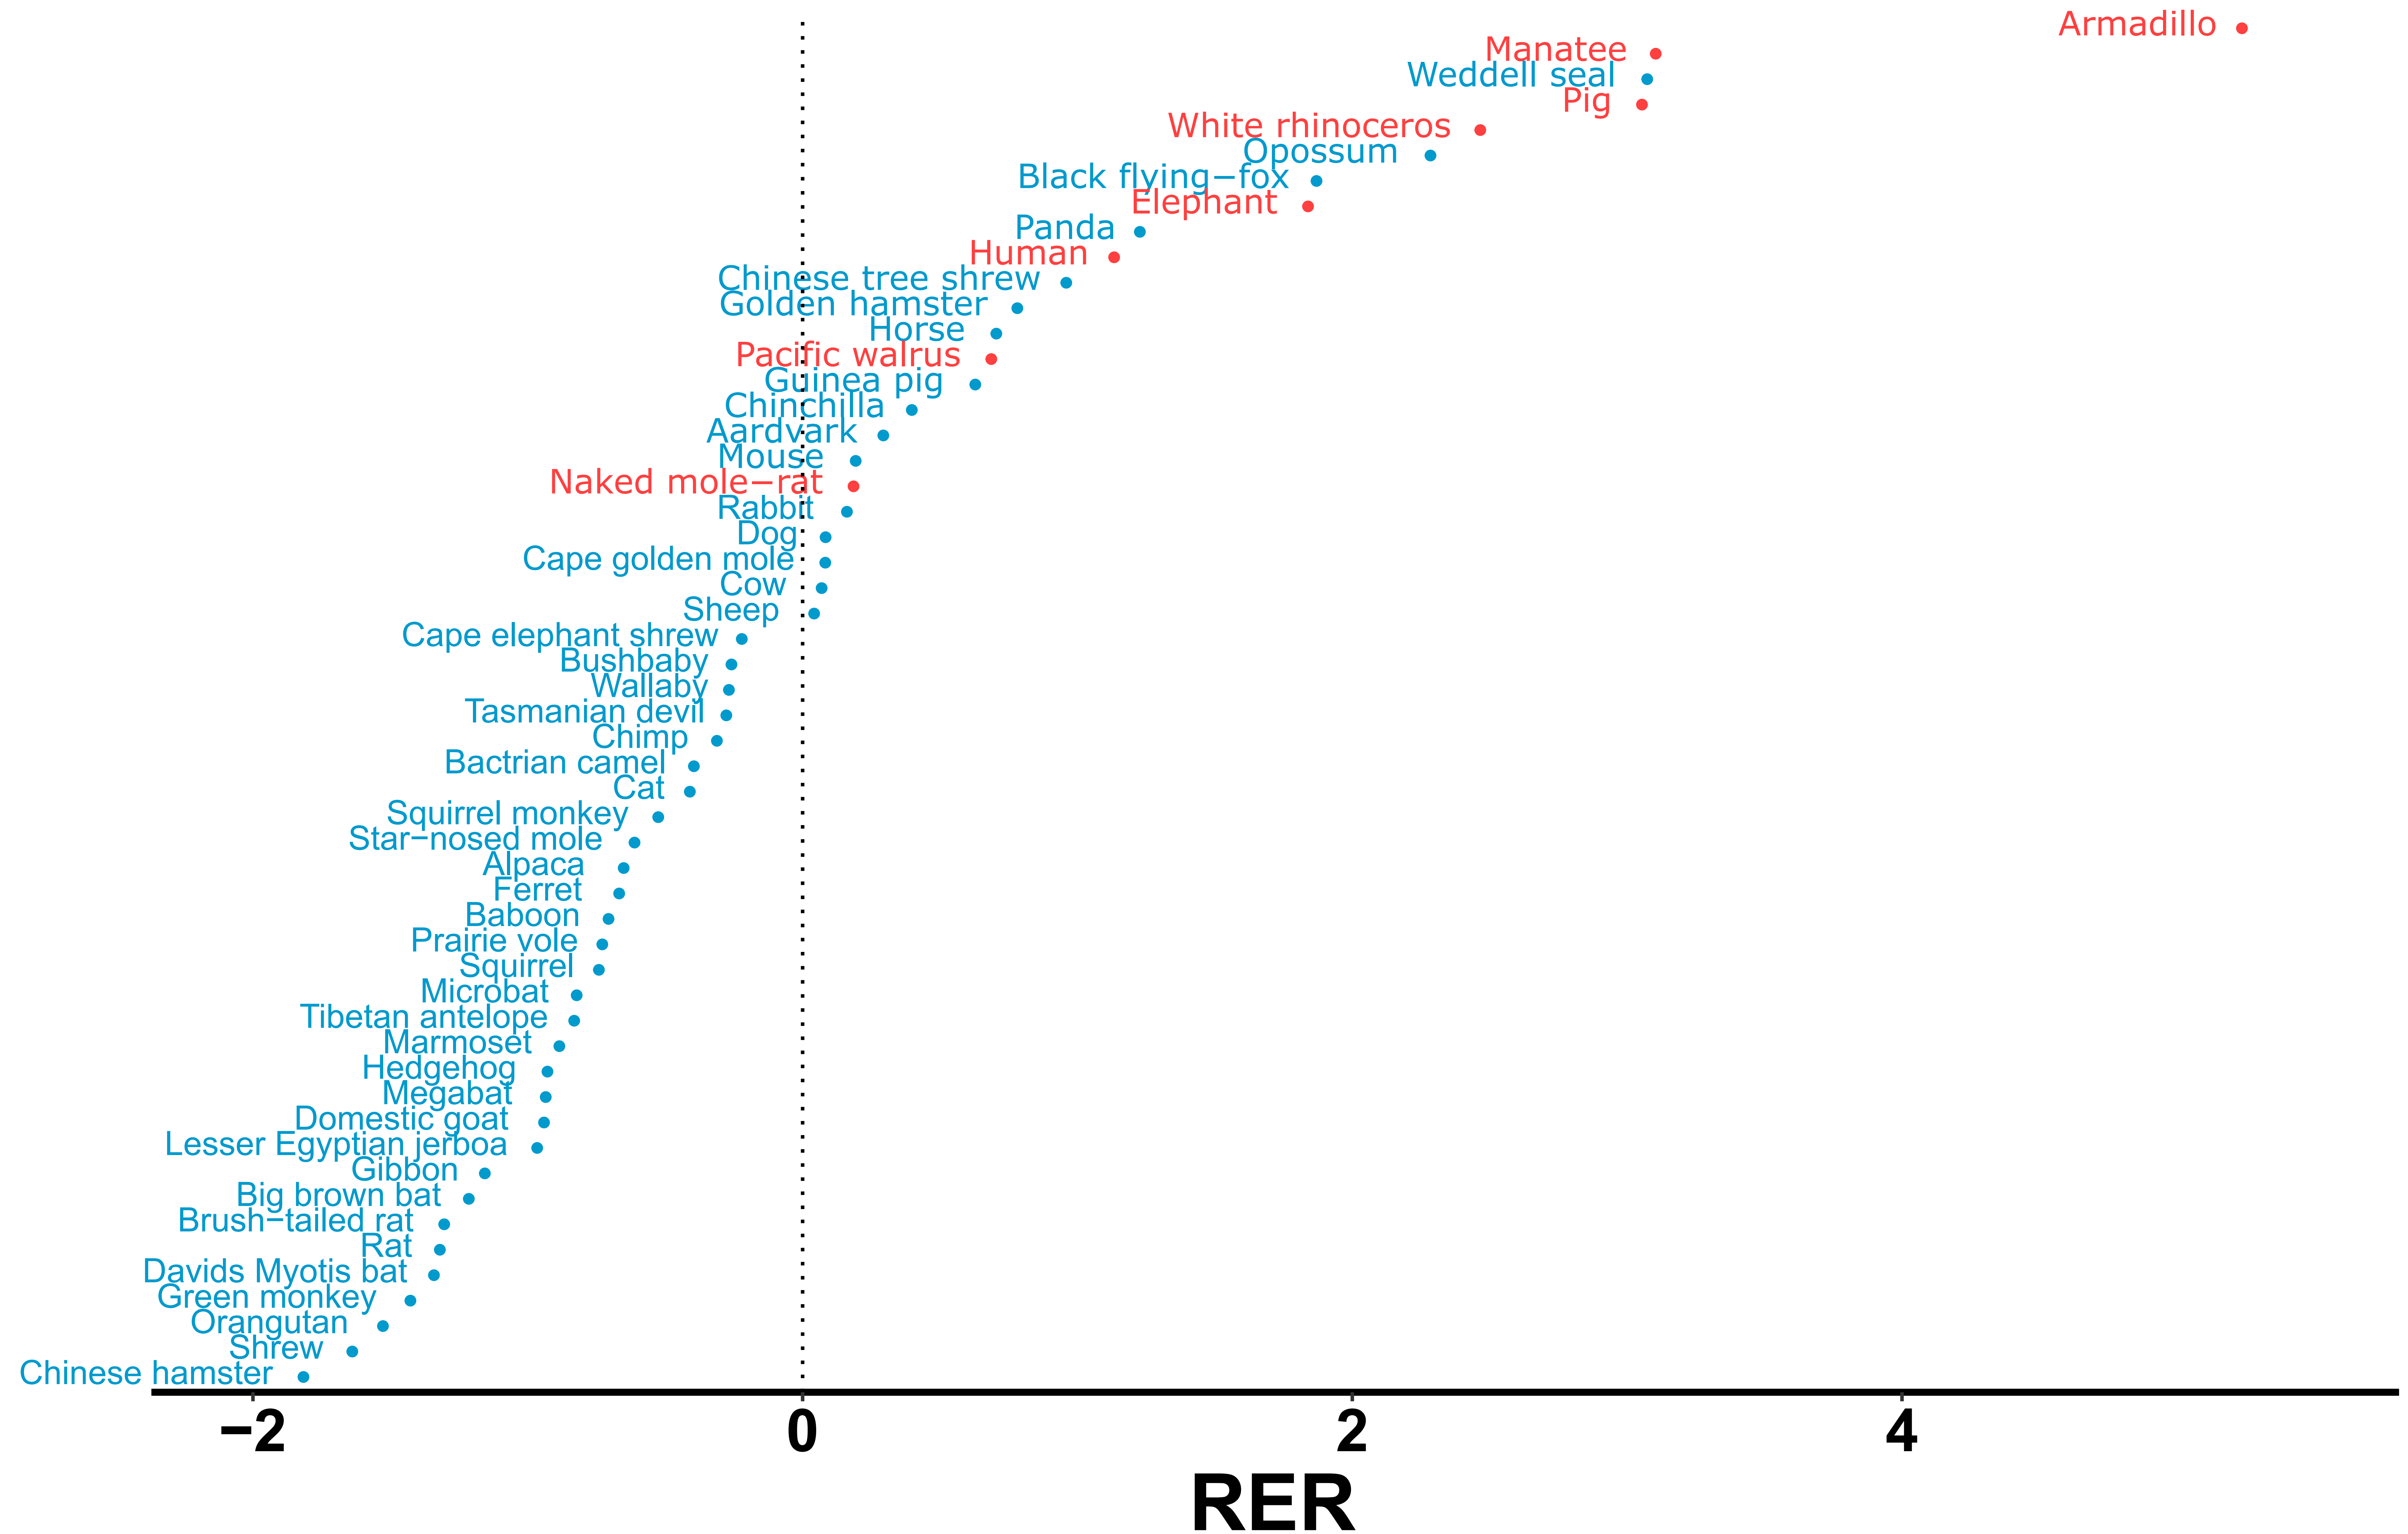

Supplement: supp [file elife_poa_e76911_Figure_1_figure_supplement_9.pdf › elife_poa_e76911_Figure_1_figure_supplement_9.pdf]
